# Supplementary material for: Oxidative addition of the C–I bond on aluminum nanoclusters
Source: Royal Society of Chemistry journal article supplement (doi:10.1039/c5nr02278a), 2015-01-01
Supplement: c5nr02278a1.pdf [file c5nr02278a1.pdf]

Supplementary Information for

**Oxidative addition of C–I bond on aluminum nanoclusters**

**Turbasu Sengupta, Susanta Das\* and Sourav Pal\***

Physical Chemistry Division, CSIR–National Chemical Laboratory, Pune 411008, India

## **Content Index**

|                                                                                |         |
|--------------------------------------------------------------------------------|---------|
| 1. Cartesian coordinates for the optimized structures and harmonic frequencies | 3-106   |
| 2. Sample IRC data and plot                                                    | 107-108 |
| 3. Grid data for Three Dimensional Potential energy surface and contour plot   | 109-169 |
| 4. Data for BOMD Simulation                                                    | 170-478 |

Cartesian coordinates for the optimized structures and harmonic frequencies in  $\text{cm}^{-1}$ .

$\text{Al}_3 \dots \text{C}_2\text{H}_5\text{I}$  (M062X/TZVP, LANL2DZ level of theory)

Reactant optimized geometry

| Center Number | Atomic Number | Atomic Type | Coordinates (Angstroms) |           |           |
|---------------|---------------|-------------|-------------------------|-----------|-----------|
|               |               |             | X                       | Y         | Z         |
| 1             | 13            | 0           | 1.519309                | 0.090764  | -1.270445 |
| 2             | 13            | 0           | 3.756342                | 0.846369  | -0.484031 |
| 3             | 13            | 0           | 2.278066                | -0.437632 | 1.158000  |
| 4             | 6             | 0           | -1.471668               | 1.319835  | 1.006452  |
| 5             | 6             | 0           | -1.668765               | 2.351913  | -0.075863 |
| 6             | 1             | 0           | -0.497045               | 1.394033  | 1.482564  |
| 7             | 1             | 0           | -1.669732               | 3.344982  | 0.380966  |
| 8             | 1             | 0           | -0.857233               | 2.319722  | -0.804300 |
| 9             | 1             | 0           | -2.614936               | 2.212432  | -0.597474 |
| 10            | 1             | 0           | -2.260375               | 1.321268  | 1.751620  |
| 11            | 53            | 0           | -1.509694               | -0.706199 | 0.194044  |

-----

Low frequencies ( $\text{cm}^{-1}$ ): 15.5864      31.2037      32.2296  
46.3841      76.2302      92.2754

Coordinate of TS

| Center Number | Atomic Number | Atomic Type | Coordinates (Angstroms) |           |           |
|---------------|---------------|-------------|-------------------------|-----------|-----------|
|               |               |             | X                       | Y         | Z         |
| 1             | 13            | 0           | 1.147854                | -0.942350 | -0.374098 |
| 2             | 13            | 0           | 3.319124                | 0.105899  | -1.054777 |
| 3             | 13            | 0           | 2.779371                | 0.154797  | 1.489428  |
| 4             | 6             | 0           | -1.740387               | 1.914644  | 0.183683  |
| 5             | 6             | 0           | -0.514883               | 2.543475  | -0.365042 |
| 6             | 1             | 0           | -1.896564               | 1.984788  | 1.253735  |
| 7             | 1             | 0           | -0.473813               | 3.601926  | -0.088313 |
| 8             | 1             | 0           | 0.399057                | 2.081687  | 0.037725  |
| 9             | 1             | 0           | -0.469826               | 2.468082  | -1.451953 |
| 10            | 1             | 0           | -2.648912               | 1.973437  | -0.402242 |
| 11            | 53            | 0           | -1.426054               | -0.565983 | 0.017963  |

-----

Low frequencies ( $\text{cm}^{-1}$ ): -362.5345      24.6195      34.2472  
44.5154      63.7185      83.4455

Optimized geometry after C-I dissociation

| Center Number | Atomic Number | Atomic Type | Coordinates (Angstroms) |   |   |
|---------------|---------------|-------------|-------------------------|---|---|
|               |               |             | X                       | Y | Z |

|    |    |   |           |           |           |
|----|----|---|-----------|-----------|-----------|
| 1  | 13 | 0 | 0.168081  | 0.883227  | 0.033298  |
| 2  | 13 | 0 | -2.482281 | 0.159843  | -0.299708 |
| 3  | 13 | 0 | -1.704179 | 2.543560  | 0.079677  |
| 4  | 6  | 0 | -3.660059 | -1.408545 | -0.511689 |
| 5  | 6  | 0 | -4.712680 | -1.500854 | 0.605514  |
| 6  | 1  | 0 | -3.044297 | -2.313328 | -0.529404 |
| 7  | 1  | 0 | -5.367345 | -2.364893 | 0.474056  |
| 8  | 1  | 0 | -4.247609 | -1.593799 | 1.589279  |
| 9  | 1  | 0 | -5.349839 | -0.614184 | 0.632612  |
| 10 | 1  | 0 | -4.148642 | -1.356675 | -1.489716 |
| 11 | 53 | 0 | 2.351568  | -0.394847 | 0.022411  |

Low frequencies (cm<sup>-1</sup>): 28.5723      45.1573      55.5322  
58.0566      94.0193      159.0976

Al<sub>3</sub> .... C<sub>2</sub>H<sub>3</sub>I (B3PW91/TZVP, LANL2DZ level of theory)

Reactant optimized geometry

| Center Number | Atomic Number | Atomic Type | Coordinates (Angstroms) |           |           |
|---------------|---------------|-------------|-------------------------|-----------|-----------|
|               |               |             | X                       | Y         | Z         |
| 1             | 13            | 0           | 1.612522                | -0.249456 | -0.860435 |
| 2             | 13            | 0           | 3.883740                | 0.675308  | -0.630411 |
| 3             | 13            | 0           | 2.868423                | -0.522300 | 1.382519  |
| 4             | 6             | 0           | -1.501207               | 1.350954  | 0.889898  |
| 5             | 6             | 0           | -1.847469               | 2.466364  | -0.057386 |
| 6             | 1             | 0           | -0.488529               | 1.420864  | 1.282000  |
| 7             | 1             | 0           | -1.829216               | 3.410060  | 0.498856  |
| 8             | 1             | 0           | -1.122545               | 2.546182  | -0.868822 |
| 9             | 1             | 0           | -2.843462               | 2.347910  | -0.486134 |
| 10            | 1             | 0           | -2.215736               | 1.226729  | 1.699220  |
| 11            | 53            | 0           | -1.512252               | -0.615129 | -0.107772 |

Low frequencies (cm<sup>-1</sup>): 17.9104      24.3624      28.0112  
39.7559      50.9824      85.4436

Coordinate of TS

| Center Number | Atomic Number | Atomic Type | Coordinates (Angstroms) |           |           |
|---------------|---------------|-------------|-------------------------|-----------|-----------|
|               |               |             | X                       | Y         | Z         |
| 1             | 13            | 0           | 1.218589                | -0.756153 | -0.316367 |
| 2             | 13            | 0           | 3.366903                | 0.211563  | -1.113292 |
| 3             | 13            | 0           | 3.026975                | 0.070088  | 1.440409  |
| 4             | 6             | 0           | -1.901153               | 1.761638  | 0.319450  |
| 5             | 6             | 0           | -0.793199               | 2.555117  | -0.266964 |

|    |    |   |           |           |           |
|----|----|---|-----------|-----------|-----------|
| 6  | 1  | 0 | -1.981039 | 1.772339  | 1.401815  |
| 7  | 1  | 0 | -0.842677 | 3.585859  | 0.103518  |
| 8  | 1  | 0 | 0.195644  | 2.167418  | 0.024961  |
| 9  | 1  | 0 | -0.835024 | 2.579977  | -1.356955 |
| 10 | 1  | 0 | -2.863965 | 1.809141  | -0.177888 |
| 11 | 53 | 0 | -1.442809 | -0.597108 | -0.008493 |

-----  
 Low frequencies (cm<sup>-1</sup>): -232.0238                    11.5189                    37.0917  
                                  41.3360                    63.9515                    72.2028

Optimized geometry after C-I dissociation

-----

| Center<br>Number | Atomic<br>Number | Atomic<br>Type | Coordinates (Angstroms) |           |           |
|------------------|------------------|----------------|-------------------------|-----------|-----------|
|                  |                  |                | X                       | Y         | Z         |
| 1                | 13               | 0              | 0.196584                | 0.869450  | -0.000272 |
| 2                | 13               | 0              | -2.464417               | 0.103279  | -0.057739 |
| 3                | 13               | 0              | -1.684722               | 2.513330  | 0.006181  |
| 4                | 6                | 0              | -3.606825               | -1.519844 | -0.108116 |
| 5                | 6                | 0              | -5.101702               | -1.266768 | 0.126822  |
| 6                | 1                | 0              | -3.217202               | -2.223302 | 0.638427  |
| 7                | 1                | 0              | -5.678226               | -2.195947 | 0.087203  |
| 8                | 1                | 0              | -5.289790               | -0.814031 | 1.104151  |
| 9                | 1                | 0              | -5.524541               | -0.594862 | -0.625048 |
| 10               | 1                | 0              | -3.450897               | -2.006993 | -1.078846 |
| 11               | 53               | 0              | 2.392359                | -0.391773 | 0.008220  |

-----  
 Low frequencies (cm<sup>-1</sup>): 4.8641                    35.3897                    62.2832  
                                  70.6395                    79.0590                    154.2336

Al<sub>3</sub> .... C<sub>2</sub>H<sub>5</sub>I (BHandHLYP/TZVP, LANL2DZ level of theory)

Optimized geometry of reactant

-----

| Center<br>Number | Atomic<br>Number | Atomic<br>Type | Coordinates (Angstroms) |           |           |
|------------------|------------------|----------------|-------------------------|-----------|-----------|
|                  |                  |                | X                       | Y         | Z         |
| 1                | 13               | 0              | 2.064621                | 0.069160  | -1.133321 |
| 2                | 13               | 0              | 4.315253                | 0.650110  | -0.175131 |
| 3                | 13               | 0              | 2.747608                | -0.815231 | 1.187117  |
| 4                | 6                | 0              | -1.609301               | 1.300177  | 0.929280  |
| 5                | 6                | 0              | -1.995706               | 2.452322  | 0.042933  |
| 6                | 1                | 0              | -0.597795               | 1.376569  | 1.293722  |
| 7                | 1                | 0              | -1.959375               | 3.370109  | 0.624478  |
| 8                | 1                | 0              | -1.314307               | 2.558774  | -0.791678 |
| 9                | 1                | 0              | -2.999771               | 2.339705  | -0.346190 |
| 10               | 1                | 0              | -2.286963               | 1.161665  | 1.755366  |

11 53 0 -1.657906 -0.605176 -0.128144

-----  
Low frequencies (cm<sup>-1</sup>): 8.9337 18.9867 21.2675  
28.0830 35.4792 63.0301

Coordinate of TS

-----  
Center Atomic Atomic Coordinates (Angstroms)  
Number Number Type X Y Z  
-----  
1 13 0 1.016002 -1.214427 -0.110394  
2 13 0 3.000425 -0.034909 -1.228729  
3 13 0 2.882616 0.097153 1.360797  
4 6 0 -1.390562 2.099868 -0.012451  
5 6 0 -0.005743 2.539871 -0.144235  
6 1 0 -1.876480 2.201710 0.939058  
7 1 0 0.286179 3.203444 0.660576  
8 1 0 0.717848 1.681869 -0.086464  
9 1 0 0.186081 3.012216 -1.098721  
10 1 0 -2.045060 2.176503 -0.859084  
11 53 0 -1.482609 -0.474260 0.020811  
-----

Low frequencies (cm<sup>-1</sup>): -122.2417 34.6578 43.5606  
55.6969 61.3758 134.0113

Optimized geometry after C-I dissociation

-----  
Center Atomic Atomic Coordinates (Angstroms)  
Number Number Type X Y Z  
-----  
1 13 0 0.181778 0.866517 0.014330  
2 13 0 -2.506031 0.189632 -0.246716  
3 13 0 -1.658255 2.548781 0.075967  
4 6 0 -3.693077 -1.370194 -0.489355  
5 6 0 -4.809138 -1.505532 0.550154  
6 1 0 -3.072995 -2.265609 -0.489578  
7 1 0 -5.428909 -2.376550 0.360171  
8 1 0 -4.412663 -1.608368 1.555399  
9 1 0 -5.465249 -0.640685 0.551663  
10 1 0 -4.121421 -1.312720 -1.489076  
11 53 0 2.363908 -0.403883 0.022266  
-----

Low frequencies (cm<sup>-1</sup>): 17.6379 42.0571 63.2690  
68.0642 92.2068 158.5390

Al<sub>3</sub> .... C<sub>2</sub>H<sub>3</sub>I (M062X/TZVP, LANL2DZ level of theory)

Reactant optimized geometry

| Center<br>Number | Atomic<br>Number | Atomic<br>Type | Coordinates (Angstroms) |           |           |
|------------------|------------------|----------------|-------------------------|-----------|-----------|
|                  |                  |                | X                       | Y         | Z         |
| 1                | 13               | 0              | 2.426670                | 1.297453  | 0.012143  |
| 2                | 13               | 0              | 1.691839                | -1.207514 | 0.023703  |
| 3                | 13               | 0              | 4.093343                | -0.616029 | -0.012343 |
| 4                | 6                | 0              | -1.094417               | 1.466142  | 0.527112  |
| 5                | 6                | 0              | -0.640063               | 2.351226  | -0.343430 |
| 6                | 1                | 0              | -0.609473               | 2.167251  | -1.410214 |
| 7                | 1                | 0              | -0.303035               | 3.319616  | 0.010453  |
| 8                | 1                | 0              | -1.136530               | 1.629280  | 1.594126  |
| 9                | 53               | 0              | -1.779210               | -0.437381 | -0.030226 |

Low frequencies (cm<sup>-1</sup>): 22.6802      36.9542      39.8806  
 44.0451      73.6529      114.0207

Coordinate of TS

| Center<br>Number | Atomic<br>Number | Atomic<br>Type | Coordinates (Angstroms) |           |           |
|------------------|------------------|----------------|-------------------------|-----------|-----------|
|                  |                  |                | X                       | Y         | Z         |
| 1                | 13               | 0              | -1.595522               | 0.039812  | -0.004564 |
| 2                | 13               | 0              | -3.838357               | -1.184129 | 0.263477  |
| 3                | 13               | 0              | -3.869276               | 1.231608  | -0.030152 |
| 4                | 6                | 0              | 3.535360                | -0.205785 | -0.208964 |
| 5                | 6                | 0              | 4.253149                | 0.347811  | 0.737266  |
| 6                | 1                | 0              | 3.805933                | 0.883679  | 1.567434  |
| 7                | 1                | 0              | 5.339741                | 0.285467  | 0.718949  |
| 8                | 1                | 0              | 3.859987                | -0.762816 | -1.077675 |
| 9                | 53               | 0              | 1.154798                | -0.045156 | -0.138725 |

Low frequencies (cm<sup>-1</sup>): -253.0738      18.2910      32.8905  
 54.2218      73.9196      82.7070

Optimized geometry after C-I dissociation

| Center<br>Number | Atomic<br>Number | Atomic<br>Type | Coordinates (Angstroms) |           |           |
|------------------|------------------|----------------|-------------------------|-----------|-----------|
|                  |                  |                | X                       | Y         | Z         |
| 1                | 13               | 0              | 0.085358                | 0.824867  | 0.002624  |
| 2                | 13               | 0              | -2.551389               | 0.009086  | -0.037949 |
| 3                | 13               | 0              | -1.833317               | 2.434392  | 0.000182  |
| 4                | 6                | 0              | -3.701278               | -1.572163 | -0.052391 |
| 5                | 6                | 0              | -5.023181               | -1.425099 | 0.071031  |

|   |    |   |           |           |           |
|---|----|---|-----------|-----------|-----------|
| 6 | 1  | 0 | -5.492073 | -0.449707 | 0.183399  |
| 7 | 1  | 0 | -5.711032 | -2.266806 | 0.067696  |
| 8 | 1  | 0 | -3.323478 | -2.587531 | -0.158937 |
| 9 | 53 | 0 | 2.316318  | -0.362280 | 0.004771  |

-----  
 Low frequencies (cm<sup>-1</sup>): 38.1472                    43.8860                    58.4384  
                                          70.4151                    95.3583                    152.9613

Al<sub>3</sub> .... C<sub>2</sub>H<sub>3</sub>I (B3PW91/TZVP, LANL2DZ level of theory)

Reactant optimized geometry

| -----  |        |        |                         |           |           |  |
|--------|--------|--------|-------------------------|-----------|-----------|--|
| Center | Atomic | Atomic | Coordinates (Angstroms) |           |           |  |
| Number | Number | Type   | X                       | Y         | Z         |  |
| -----  |        |        |                         |           |           |  |
| 1      | 13     | 0      | 3.022611                | -0.322474 | 1.401899  |  |
| 2      | 13     | 0      | 3.053118                | -0.930044 | -1.045717 |  |
| 3      | 13     | 0      | 3.045152                | 1.493048  | -0.347107 |  |
| 4      | 6      | 0      | -3.277613               | -0.287667 | 0.002145  |  |
| 5      | 6      | 0      | -4.099533               | 0.745401  | -0.002684 |  |
| 6      | 1      | 0      | -3.756301               | 1.772988  | -0.009416 |  |
| 7      | 1      | 0      | -5.172795               | 0.577985  | 0.000099  |  |
| 8      | 1      | 0      | -3.614258               | -1.316048 | 0.008857  |  |
| 9      | 53     | 0      | -1.165382               | -0.130344 | -0.002156 |  |

-----  
 Low frequencies (cm<sup>-1</sup>): 18.6641                    10.9623                    14.5503  
                                          26.7839                    35.0649                    35.7510

Coordinate of TS

| -----  |        |        |                         |           |           |  |
|--------|--------|--------|-------------------------|-----------|-----------|--|
| Center | Atomic | Atomic | Coordinates (Angstroms) |           |           |  |
| Number | Number | Type   | X                       | Y         | Z         |  |
| -----  |        |        |                         |           |           |  |
| 1      | 13     | 0      | 1.606446                | 0.003781  | -0.001064 |  |
| 2      | 13     | 0      | 3.845388                | 1.227693  | 0.100629  |  |
| 3      | 13     | 0      | 3.844645                | -1.217107 | 0.153198  |  |
| 4      | 6      | 0      | -3.551601               | -0.030347 | -0.260499 |  |
| 5      | 6      | 0      | -4.275338               | 0.054872  | 0.828588  |  |
| 6      | 1      | 0      | -3.842695               | 0.138530  | 1.820521  |  |
| 7      | 1      | 0      | -5.364339               | 0.044201  | 0.770516  |  |
| 8      | 1      | 0      | -3.862971               | -0.116922 | -1.293290 |  |
| 9      | 53     | 0      | -1.147596               | -0.007542 | -0.150796 |  |

-----  
 Low frequencies (cm<sup>-1</sup>): -219.2564                    7.3363                    10.8490  
                                          23.6434                    63.5098                    86.5933

Optimized geometry after C-I dissociation

-----



| Center<br>Number | Atomic<br>Number | Atomic<br>Type | Coordinates (Angstroms) |           |           |
|------------------|------------------|----------------|-------------------------|-----------|-----------|
|                  |                  |                | X                       | Y         | Z         |
| 1                | 13               | 0              | 0.087197                | 0.837478  | 0.000880  |
| 2                | 13               | 0              | -2.560820               | 0.050456  | -0.000958 |
| 3                | 13               | 0              | -1.810653               | 2.466736  | -0.000097 |
| 4                | 6                | 0              | -3.681504               | -1.560908 | -0.000284 |
| 5                | 6                | 0              | -5.017586               | -1.498014 | 0.000775  |
| 6                | 1                | 0              | -5.559139               | -0.553847 | 0.001120  |
| 7                | 1                | 0              | -5.646522               | -2.386726 | 0.001335  |
| 8                | 1                | 0              | -3.234634               | -2.556498 | -0.000508 |
| 9                | 53               | 0              | 2.308121                | -0.372832 | -0.000049 |

Low frequencies (cm<sup>-1</sup>): 17.6073                      36.1267                      63.3411  
75.5139                      84.5415                      156.8040

Al<sub>3</sub> .... C<sub>2</sub>H<sub>3</sub>I (BHandHLYP/TZVP, LANL2DZ level of theory)

Optimized geometry of reactant

| Center<br>Number | Atomic<br>Number | Atomic<br>Type | Coordinates (Angstroms) |           |           |
|------------------|------------------|----------------|-------------------------|-----------|-----------|
|                  |                  |                | X                       | Y         | Z         |
| 1                | 13               | 0              | -2.723164               | 1.286148  | -0.203915 |
| 2                | 13               | 0              | -2.157990               | -1.205355 | 0.019307  |
| 3                | 13               | 0              | -4.554473               | -0.437360 | 0.094316  |
| 4                | 6                | 0              | 1.543697                | 1.526381  | -0.395514 |
| 5                | 6                | 0              | 1.037251                | 2.358455  | 0.481902  |
| 6                | 1                | 0              | 0.796352                | 2.075136  | 1.490098  |
| 7                | 1                | 0              | 0.853902                | 3.381110  | 0.197652  |
| 8                | 1                | 0              | 1.788714                | 1.802911  | -1.402293 |
| 9                | 53               | 0              | 1.957330                | -0.489298 | 0.006981  |

Low frequencies (cm<sup>-1</sup>): 5.2281                      22.3763                      23.6223  
27.3595                      31.5191                      59.9244

Coordinate of TS

| Center<br>Number | Atomic<br>Number | Atomic<br>Type | Coordinates (Angstroms) |           |           |
|------------------|------------------|----------------|-------------------------|-----------|-----------|
|                  |                  |                | X                       | Y         | Z         |
| 1                | 13               | 0              | 1.657892                | 0.002547  | 0.022350  |
| 2                | 13               | 0              | 3.962030                | 1.247625  | 0.038647  |
| 3                | 13               | 0              | 3.962127                | -1.242282 | 0.061251  |
| 4                | 6                | 0              | -3.518610               | -0.015890 | -0.421170 |

|   |    |   |           |           |           |
|---|----|---|-----------|-----------|-----------|
| 5 | 6  | 0 | -4.358039 | 0.028085  | 0.576649  |
| 6 | 1  | 0 | -4.039843 | 0.071554  | 1.604056  |
| 7 | 1  | 0 | -5.423750 | 0.021989  | 0.397758  |
| 8 | 1  | 0 | -3.744452 | -0.060374 | -1.469713 |
| 9 | 53 | 0 | -1.209409 | -0.003942 | -0.057627 |

-----  
 Low frequencies (cm<sup>-1</sup>): -286.9154                      9.6565                      17.4843  
                                          23.8661                      72.7740                      73.2770

Optimized geometry after C-I dissociation

| Center<br>Number | Atomic<br>Number | Atomic<br>Type | Coordinates (Angstroms) |           |           |
|------------------|------------------|----------------|-------------------------|-----------|-----------|
|                  |                  |                | X                       | Y         | Z         |
| 1                | 13               | 0              | 0.088194                | 0.803125  | 0.000045  |
| 2                | 13               | 0              | -2.582728               | 0.043718  | -0.000001 |
| 3                | 13               | 0              | -1.794835               | 2.440106  | -0.000026 |
| 4                | 6                | 0              | -3.731206               | -1.537067 | -0.000036 |
| 5                | 6                | 0              | -5.056666               | -1.447397 | 0.000028  |
| 6                | 1                | 0              | -5.573625               | -0.499574 | 0.000104  |
| 7                | 1                | 0              | -5.699113               | -2.315010 | 0.000007  |
| 8                | 1                | 0              | -3.313087               | -2.535395 | -0.000110 |
| 9                | 53               | 0              | 2.322167                | -0.367426 | -0.000003 |

-----  
 Low frequencies (cm<sup>-1</sup>): 22.6896                      37.9963                      65.8635  
                                          78.7546                      91.5416                      155.0018

Al<sub>3</sub> .... C<sub>6</sub>H<sub>5</sub>I (M062X/TZVP, LANL2DZ level of theory)

Optimized geometry of reactant

| Center<br>Number | Atomic<br>Number | Atomic<br>Type | Coordinates (Angstroms) |           |           |
|------------------|------------------|----------------|-------------------------|-----------|-----------|
|                  |                  |                | X                       | Y         | Z         |
| 1                | 13               | 0              | 2.190142                | -1.593684 | 0.000023  |
| 2                | 13               | 0              | 2.326024                | 0.999896  | -0.000018 |
| 3                | 13               | 0              | 4.390212                | -0.454671 | -0.000005 |
| 4                | 6                | 0              | -1.129969               | 0.696875  | -0.000001 |
| 5                | 6                | 0              | -1.003444               | 1.366834  | 1.209529  |
| 6                | 6                | 0              | -0.775696               | 2.738561  | 1.201504  |
| 7                | 6                | 0              | -0.663680               | 3.425475  | 0.000011  |
| 8                | 6                | 0              | -0.775695               | 2.738572  | -1.201489 |
| 9                | 6                | 0              | -1.003446               | 1.366843  | -1.209526 |
| 10               | 1                | 0              | -1.088358               | 0.831991  | 2.145925  |
| 11               | 1                | 0              | -0.676341               | 3.264052  | 2.142457  |
| 12               | 1                | 0              | -0.482743               | 4.492207  | 0.000016  |
| 13               | 1                | 0              | -0.676338               | 3.264071  | -2.142437 |
| 14               | 1                | 0              | -1.088359               | 0.832007  | -2.145927 |
| 15               | 53               | 0              | -1.503004               | -1.378365 | -0.000004 |

Low frequencies (cm<sup>-1</sup>): 16.0116            34.3228            36.0911  
                                  38.1985            60.8072            64.3629

Coordinate of TS

| Center Number | Atomic Number | Atomic Type | Coordinates (Angstroms) |           |           |
|---------------|---------------|-------------|-------------------------|-----------|-----------|
|               |               |             | X                       | Y         | Z         |
| 1             | 13            | 0           | -2.257699               | -0.370295 | -0.292727 |
| 2             | 13            | 0           | -2.689511               | 1.715988  | 1.459295  |
| 3             | 13            | 0           | -3.479645               | 1.701592  | -1.040680 |
| 4             | 6             | 0           | 1.744096                | 0.122281  | -0.032888 |
| 5             | 6             | 0           | 1.310419                | 1.410176  | -0.192204 |
| 6             | 6             | 0           | 2.270507                | 2.420073  | -0.232843 |
| 7             | 6             | 0           | 3.617671                | 2.101069  | -0.111860 |
| 8             | 6             | 0           | 4.015958                | 0.778707  | 0.048578  |
| 9             | 6             | 0           | 3.065210                | -0.240407 | 0.089665  |
| 10            | 1             | 0           | 0.248914                | 1.643616  | -0.289843 |
| 11            | 1             | 0           | 1.963606                | 3.451623  | -0.359770 |
| 12            | 1             | 0           | 4.362037                | 2.886459  | -0.144562 |
| 13            | 1             | 0           | 5.067797                | 0.536087  | 0.142705  |
| 14            | 1             | 0           | 3.365462                | -1.274326 | 0.213635  |
| 15            | 53            | 0           | -0.030224               | -1.630369 | 0.026238  |

Low frequencies (cm<sup>-1</sup>): -178.3803            15.0783            29.6036  
                                  36.3005            45.0782            68.9862

Optimized geometry after C-I dissociation

| Center Number | Atomic Number | Atomic Type | Coordinates (Angstroms) |           |           |
|---------------|---------------|-------------|-------------------------|-----------|-----------|
|               |               |             | X                       | Y         | Z         |
| 1             | 13            | 0           | -1.427025               | 1.106665  | 0.008094  |
| 2             | 13            | 0           | 1.322700                | 1.298544  | 0.018889  |
| 3             | 13            | 0           | -0.223282               | 3.301288  | 0.080165  |
| 4             | 6             | 0           | 2.892793                | 0.127631  | 0.004845  |
| 5             | 6             | 0           | 2.758087                | -1.259857 | 0.147636  |
| 6             | 6             | 0           | 3.866066                | -2.097382 | 0.142484  |
| 7             | 6             | 0           | 5.138731                | -1.559815 | -0.005672 |
| 8             | 6             | 0           | 5.299712                | -0.187488 | -0.149155 |
| 9             | 6             | 0           | 4.187063                | 0.643608  | -0.143639 |
| 10            | 1             | 0           | 1.773566                | -1.704384 | 0.266119  |
| 11            | 1             | 0           | 3.738294                | -3.167179 | 0.254157  |
| 12            | 1             | 0           | 6.004757                | -2.210055 | -0.009504 |
| 13            | 1             | 0           | 6.291098                | 0.233201  | -0.265349 |
| 14            | 1             | 0           | 4.339446                | 1.712993  | -0.257755 |
| 15            | 53            | 0           | -3.070622               | -0.812249 | -0.025653 |

Low frequencies (cm<sup>-1</sup>): 15.7963            19.4106            45.0489  
                                  52.1904            62.2680            139.6541



28.3708            43.4648            47.6266

Optimized geometry after C-I dissociation

| Center<br>Number | Atomic<br>Number | Atomic<br>Type | Coordinates (Angstroms) |           |           |
|------------------|------------------|----------------|-------------------------|-----------|-----------|
|                  |                  |                | X                       | Y         | Z         |
| 1                | 13               | 0              | 1.437168                | 1.102069  | -0.004451 |
| 2                | 13               | 0              | -1.321253               | 1.265409  | -0.008947 |
| 3                | 13               | 0              | 0.209730                | 3.279481  | -0.017667 |
| 4                | 6                | 0              | -2.913731               | 0.110249  | -0.003930 |
| 5                | 6                | 0              | -2.803617               | -1.287790 | -0.039919 |
| 6                | 6                | 0              | -3.929666               | -2.101208 | -0.035746 |
| 7                | 6                | 0              | -5.196691               | -1.531129 | 0.004632  |
| 8                | 6                | 0              | -5.333797               | -0.148616 | 0.040778  |
| 9                | 6                | 0              | -4.204045               | 0.659666  | 0.036475  |
| 10               | 1                | 0              | -1.824739               | -1.759708 | -0.071858 |
| 11               | 1                | 0              | -3.820048               | -3.180062 | -0.063827 |
| 12               | 1                | 0              | -6.077103               | -2.164519 | 0.008004  |
| 13               | 1                | 0              | -6.321639               | 0.298560  | 0.072419  |
| 14               | 1                | 0              | -4.338944               | 1.738101  | 0.065330  |
| 15               | 53               | 0              | 3.102611                | -0.802828 | 0.007170  |

-----

Low frequencies (cm<sup>-1</sup>): 8.0226            22.2909            45.7255  
61.2105            62.8176            144.2999

Al<sub>3</sub> .... C<sub>6</sub>H<sub>5</sub>I (BHandHLYP/TZVP, LANL2DZ level of theory)

Optimized geometry of reactant

| Center<br>Number | Atomic<br>Number | Atomic<br>Type | Coordinates (Angstroms) |           |           |
|------------------|------------------|----------------|-------------------------|-----------|-----------|
|                  |                  |                | X                       | Y         | Z         |
| 1                | 13               | 0              | 2.800763                | -1.358936 | 0.001832  |
| 2                | 13               | 0              | 2.655527                | 1.199276  | -0.004517 |
| 3                | 13               | 0              | 4.900543                | 0.040187  | 0.001272  |
| 4                | 6                | 0              | -1.416257               | 0.577873  | 0.000406  |
| 5                | 6                | 0              | -1.399312               | 1.258310  | 1.201626  |
| 6                | 6                | 0              | -1.371618               | 2.640757  | 1.195607  |
| 7                | 6                | 0              | -1.359606               | 3.334401  | 0.001394  |
| 8                | 6                | 0              | -1.373050               | 2.641658  | -1.193316 |
| 9                | 6                | 0              | -1.400757               | 1.259213  | -1.200327 |
| 10               | 1                | 0              | -1.409218               | 0.723671  | 2.132782  |
| 11               | 1                | 0              | -1.358554               | 3.171557  | 2.130607  |
| 12               | 1                | 0              | -1.338276               | 4.409124  | 0.001770  |
| 13               | 1                | 0              | -1.361137               | 3.173156  | -2.127926 |
| 14               | 1                | 0              | -1.411818               | 0.725273  | -2.131862 |
| 15               | 53               | 0              | -1.468608               | -1.526847 | -0.000365 |

Low frequencies (cm<sup>-1</sup>): 8.7789                    15.1250                    19.2197  
                                  19.3653                    23.8769                    25.9248

Coordinate of TS

| Center<br>Number | Atomic<br>Number | Atomic<br>Type | Coordinates (Angstroms) |           |           |
|------------------|------------------|----------------|-------------------------|-----------|-----------|
|                  |                  |                | X                       | Y         | Z         |
| 1                | 13               | 0              | -2.732122               | -0.003100 | -0.003195 |
| 2                | 13               | 0              | -4.993791               | 0.171954  | -1.212480 |
| 3                | 13               | 0              | -4.985568               | -0.167992 | 1.218505  |
| 4                | 6                | 0              | 2.468500                | 0.000383  | 0.000035  |
| 5                | 6                | 0              | 3.126195                | -1.197948 | -0.122749 |
| 6                | 6                | 0              | 4.511902                | -1.189981 | -0.121184 |
| 7                | 6                | 0              | 5.201159                | 0.001820  | 0.001591  |
| 8                | 6                | 0              | 4.510492                | 1.192887  | 0.123547  |
| 9                | 6                | 0              | 3.124767                | 1.199384  | 0.123563  |
| 10               | 1                | 0              | 2.587191                | -2.122796 | -0.218448 |
| 11               | 1                | 0              | 5.049106                | -2.117363 | -0.216166 |
| 12               | 1                | 0              | 6.276391                | 0.002382  | 0.002232  |
| 13               | 1                | 0              | 5.046604                | 2.120851  | 0.219163  |
| 14               | 1                | 0              | 2.584559                | 2.123653  | 0.218506  |
| 15               | 53               | 0              | 0.114100                | -0.001079 | -0.001338 |

Low frequencies (cm<sup>-1</sup>): -251.2043                    11.2847                    11.3261  
                                  13.8275                    59.3160                    80.6975

Optimized geometry after C-I dissociation

| Center<br>Number | Atomic<br>Number | Atomic<br>Type | Coordinates (Angstroms) |           |           |
|------------------|------------------|----------------|-------------------------|-----------|-----------|
|                  |                  |                | X                       | Y         | Z         |
| 1                | 13               | 0              | 1.427054                | 1.073292  | -0.001757 |
| 2                | 13               | 0              | -1.344008               | 1.243105  | -0.004167 |
| 3                | 13               | 0              | 0.195583                | 3.241679  | -0.007383 |
| 4                | 6                | 0              | -2.937479               | 0.105443  | -0.001851 |
| 5                | 6                | 0              | -2.838591               | -1.286339 | -0.016929 |
| 6                | 6                | 0              | -3.962782               | -2.089388 | -0.014926 |
| 7                | 6                | 0              | -5.219792               | -1.514745 | 0.002286  |
| 8                | 6                | 0              | -5.347798               | -0.138637 | 0.017433  |
| 9                | 6                | 0              | -4.218869               | 0.657792  | 0.015348  |
| 10               | 1                | 0              | -1.870905               | -1.761802 | -0.030483 |
| 11               | 1                | 0              | -3.859851               | -3.160150 | -0.026666 |
| 12               | 1                | 0              | -6.096778               | -2.137540 | 0.003918  |
| 13               | 1                | 0              | -6.324854               | 0.311393  | 0.030854  |
| 14               | 1                | 0              | -4.347709               | 1.728242  | 0.027425  |
| 15               | 53               | 0              | 3.132638                | -0.785658 | 0.003014  |

Low frequencies (cm<sup>-1</sup>): 2.1516                    21.9165                    48.9418

63.6062

65.7025

144.4903

Al<sub>5</sub> ... C<sub>2</sub>H<sub>5</sub>I (M062X/TZVP, LANL2DZ level of theory)

## Optimized geometry of reactant

| Center Number | Atomic Number | Atomic Type | Coordinates (Angstroms) |           |           |
|---------------|---------------|-------------|-------------------------|-----------|-----------|
|               |               |             | X                       | Y         | Z         |
| 1             | 13            | 0           | 3.762295                | 0.880132  | -1.087347 |
| 2             | 13            | 0           | 4.639210                | -1.252023 | 0.065170  |
| 3             | 13            | 0           | 1.608102                | 1.803435  | -0.339675 |
| 4             | 13            | 0           | 2.407079                | -0.502747 | 0.887847  |
| 5             | 13            | 0           | 0.226379                | 0.558673  | 1.600092  |
| 6             | 6             | 0           | -3.446202               | 0.596253  | 0.506875  |
| 7             | 6             | 0           | -3.280023               | 1.978751  | -0.076979 |
| 8             | 1             | 0           | -3.247267               | 0.564657  | 1.574656  |
| 9             | 1             | 0           | -4.015119               | 2.648440  | 0.376632  |
| 10            | 1             | 0           | -2.286447               | 2.379024  | 0.129481  |
| 11            | 1             | 0           | -3.435337               | 1.978664  | -1.155226 |
| 12            | 1             | 0           | -4.415406               | 0.155548  | 0.297262  |
| 13            | 53            | 0           | -2.011376               | -0.802141 | -0.347949 |

Low frequencies (cm<sup>-1</sup>): 11.2343      22.5803      34.2973  
 41.4189      45.8560      72.8031

## Coordinate of TS

| Center Number | Atomic Number | Atomic Type | Coordinates (Angstroms) |           |           |
|---------------|---------------|-------------|-------------------------|-----------|-----------|
|               |               |             | X                       | Y         | Z         |
| 1             | 13            | 0           | 4.174734                | 0.603186  | -1.019996 |
| 2             | 13            | 0           | 4.837978                | -0.689086 | 1.051882  |
| 3             | 13            | 0           | 1.796337                | 1.172525  | -1.257718 |
| 4             | 13            | 0           | 2.363502                | -0.527423 | 0.837431  |
| 5             | 13            | 0           | 0.062841                | 0.272055  | 0.554849  |
| 6             | 6             | 0           | -3.684180               | 1.116350  | 0.512282  |
| 7             | 6             | 0           | -2.808873               | 2.107597  | 1.185024  |
| 8             | 1             | 0           | -4.333326               | 0.519188  | 1.139952  |
| 9             | 1             | 0           | -3.407120               | 2.944384  | 1.560922  |
| 10            | 1             | 0           | -2.283265               | 1.675159  | 2.041200  |
| 11            | 1             | 0           | -2.063562               | 2.526193  | 0.501990  |
| 12            | 1             | 0           | -4.119074               | 1.401664  | -0.437461 |
| 13            | 53            | 0           | -2.205574               | -0.739936 | -0.323665 |

Low frequencies (cm<sup>-1</sup>): -419.7713      18.2885      27.4023  
 35.8857      44.7678      68.3376

Optimized geometry after C-I dissociation

| Center Number | Atomic Number | Atomic Type | Coordinates (Angstroms) |           |           |
|---------------|---------------|-------------|-------------------------|-----------|-----------|
|               |               |             | X                       | Y         | Z         |
| 1             | 13            | 0           | 3.651713                | -0.582773 | -0.984065 |
| 2             | 13            | 0           | 1.744635                | -2.337706 | -0.576847 |
| 3             | 13            | 0           | 2.113996                | -0.792441 | 1.585389  |
| 4             | 13            | 0           | 1.794304                | 1.154549  | 0.109306  |
| 5             | 13            | 0           | -0.164257               | -0.773587 | 0.719524  |
| 6             | 6             | 0           | 1.351004                | 2.963262  | -0.536148 |
| 7             | 6             | 0           | 0.210868                | 3.615547  | 0.258754  |
| 8             | 1             | 0           | 1.080135                | 2.877861  | -1.593561 |
| 9             | 1             | 0           | -0.037146               | 4.604830  | -0.132596 |
| 10            | 1             | 0           | -0.698062               | 3.010960  | 0.223899  |
| 11            | 1             | 0           | 0.476879                | 3.736877  | 1.310533  |
| 12            | 1             | 0           | 2.251668                | 3.582417  | -0.506629 |
| 13            | 53            | 0           | -2.476788               | -0.263591 | -0.164722 |

Low frequencies (cm<sup>-1</sup>): 6.7622      35.9549      38.6210  
43.8496      75.5636      90.5252

Al<sub>5</sub> .... C<sub>2</sub>H<sub>3</sub>I (B3PW91/TZVP, LANL2DZ level of theory)

Optimized geometry of reactant

| Center Number | Atomic Number | Atomic Type | Coordinates (Angstroms) |           |           |
|---------------|---------------|-------------|-------------------------|-----------|-----------|
|               |               |             | X                       | Y         | Z         |
| 1             | 13            | 0           | 4.116497                | 0.699446  | -0.966253 |
| 2             | 13            | 0           | 4.770886                | -1.327353 | 0.467421  |
| 3             | 13            | 0           | 1.940359                | 1.799288  | -0.548536 |
| 4             | 13            | 0           | 2.431020                | -0.532727 | 0.873751  |
| 5             | 13            | 0           | 0.320283                | 0.796881  | 1.255278  |
| 6             | 6             | 0           | -3.656415               | -0.065754 | 0.888756  |
| 7             | 6             | 0           | -4.213264               | 1.312345  | 0.649024  |
| 8             | 1             | 0           | -3.188274               | -0.174172 | 1.863993  |
| 9             | 1             | 0           | -5.007977               | 1.501748  | 1.378916  |
| 10            | 1             | 0           | -3.453089               | 2.084564  | 0.775415  |
| 11            | 1             | 0           | -4.643063               | 1.409814  | -0.348719 |
| 12            | 1             | 0           | -4.385317               | -0.857787 | 0.739591  |
| 13            | 53            | 0           | -2.049657               | -0.568032 | -0.522594 |

Low frequencies (cm<sup>-1</sup>): 14.1306      19.9839      21.6705  
34.2336      47.7104      52.5120

Coordinate of TS

| Center | Atomic | Atomic | Coordinates (Angstroms) |  |  |
|--------|--------|--------|-------------------------|--|--|
|--------|--------|--------|-------------------------|--|--|



| Number | Number | Type | X         | Y         | Z         |
|--------|--------|------|-----------|-----------|-----------|
| 1      | 13     | 0    | 4.171564  | 0.614040  | -0.974379 |
| 2      | 13     | 0    | 4.825349  | -0.791906 | 1.017459  |
| 3      | 13     | 0    | 1.798739  | 1.289468  | -1.192474 |
| 4      | 13     | 0    | 2.341454  | -0.534467 | 0.869993  |
| 5      | 13     | 0    | 0.067107  | 0.389975  | 0.552868  |
| 6      | 6      | 0    | -3.697085 | 0.863359  | 0.817164  |
| 7      | 6      | 0    | -2.956144 | 2.114035  | 1.077461  |
| 8      | 1      | 0    | -3.920587 | 0.234159  | 1.671629  |
| 9      | 1      | 0    | -3.420815 | 2.672540  | 1.898106  |
| 10     | 1      | 0    | -1.917043 | 1.917103  | 1.412096  |
| 11     | 1      | 0    | -2.901221 | 2.758887  | 0.199727  |
| 12     | 1      | 0    | -4.477422 | 0.878643  | 0.066170  |
| 13     | 53     | 0    | -2.171666 | -0.733927 | -0.380577 |

Low frequencies (cm<sup>-1</sup>): -246.3776      19.2051      25.8634  
48.8835      71.4887      74.3242

Optimized geometry after C-I dissociation

| Center Number | Atomic Number | Atomic Type | Coordinates (Angstroms) |           |           |
|---------------|---------------|-------------|-------------------------|-----------|-----------|
|               |               |             | X                       | Y         | Z         |
| 1             | 13            | 0           | 3.490025                | -1.115249 | -1.022140 |
| 2             | 13            | 0           | 1.405780                | -2.578675 | -0.425760 |
| 3             | 13            | 0           | 1.895074                | -0.939494 | 1.639162  |
| 4             | 13            | 0           | 2.112592                | 0.965001  | 0.034278  |
| 5             | 13            | 0           | -0.292505               | -0.633124 | 0.631002  |
| 6             | 6             | 0           | 2.067681                | 2.869161  | -0.526138 |
| 7             | 6             | 0           | 1.099478                | 3.770621  | 0.244837  |
| 8             | 1             | 0           | 1.837533                | 2.882383  | -1.598650 |
| 9             | 1             | 0           | 1.142941                | 4.804199  | -0.113837 |
| 10            | 1             | 0           | 0.064435                | 3.435322  | 0.142560  |
| 11            | 1             | 0           | 1.326980                | 3.789589  | 1.313813  |
| 12            | 1             | 0           | 3.095330                | 3.243189  | -0.445896 |
| 13            | 53            | 0           | -2.611561               | -0.039120 | -0.165005 |

Low frequencies (cm<sup>-1</sup>): 20.2245      32.0998      45.3815  
55.3671      81.5519      98.7903

Al<sub>5</sub> .... C<sub>2</sub>H<sub>5</sub>I (BHandHLYP/TZVP, LANL2DZ level of theory)

Optimized geometry of reactant

| Center Number | Atomic Number | Atomic Type | Coordinates (Angstroms) |          |           |
|---------------|---------------|-------------|-------------------------|----------|-----------|
|               |               |             | X                       | Y        | Z         |
| 1             | 13            | 0           | 4.286462                | 0.611448 | -1.101083 |

|    |    |   |           |           |           |
|----|----|---|-----------|-----------|-----------|
| 2  | 13 | 0 | 4.988837  | -1.383098 | 0.384933  |
| 3  | 13 | 0 | 2.147793  | 1.766432  | -0.669427 |
| 4  | 13 | 0 | 2.723012  | -0.428715 | 0.948513  |
| 5  | 13 | 0 | 0.632924  | 0.963355  | 1.309154  |
| 6  | 6  | 0 | -3.785442 | 0.292712  | 0.862555  |
| 7  | 6  | 0 | -4.302716 | 1.565172  | 0.248281  |
| 8  | 1  | 0 | -3.274217 | 0.459350  | 1.796580  |
| 9  | 1  | 0 | -5.037338 | 2.006931  | 0.916888  |
| 10 | 1  | 0 | -3.509865 | 2.286907  | 0.097617  |
| 11 | 1  | 0 | -4.782764 | 1.382071  | -0.704716 |
| 12 | 1  | 0 | -4.556042 | -0.447709 | 0.999689  |
| 13 | 53 | 0 | -2.310155 | -0.692780 | -0.398269 |

-----  
 Low frequencies (cm<sup>-1</sup>): 4.4557                    12.6221                    13.6534  
                                          22.8792                    26.8167                    34.6591

#### Coordinate of TS

| Center<br>Number | Atomic<br>Number | Atomic<br>Type | Coordinates (Angstroms) |           |           |
|------------------|------------------|----------------|-------------------------|-----------|-----------|
|                  |                  |                | X                       | Y         | Z         |
| 1                | 13               | 0              | 4.201408                | 0.553501  | -0.914500 |
| 2                | 13               | 0              | 4.849139                | -0.668653 | 1.232804  |
| 3                | 13               | 0              | 1.862747                | 1.463185  | -1.211951 |
| 4                | 13               | 0              | 2.347734                | -0.792071 | 0.591171  |
| 5                | 13               | 0              | 0.138317                | 0.318554  | 0.309862  |
| 6                | 6                | 0              | -3.673218               | 1.103226  | 0.530904  |
| 7                | 6                | 0              | -2.976228               | 1.768111  | 1.654298  |
| 8                | 1                | 0              | -4.521973               | 0.488595  | 0.768792  |
| 9                | 1                | 0              | -3.500675               | 2.684339  | 1.919359  |
| 10               | 1                | 0              | -2.926308               | 1.138025  | 2.533529  |
| 11               | 1                | 0              | -1.960423               | 2.062044  | 1.386828  |
| 12               | 1                | 0              | -3.791270               | 1.674220  | -0.372804 |
| 13               | 53               | 0              | -2.218758               | -0.691395 | -0.366848 |

-----  
 Low frequencies (cm<sup>-1</sup>): -536.2191                    21.2063                    25.8897  
                                          39.3062                    49.2164                    60.1022

#### Optimized geometry after C-I dissociation

| Center<br>Number | Atomic<br>Number | Atomic<br>Type | Coordinates (Angstroms) |           |           |
|------------------|------------------|----------------|-------------------------|-----------|-----------|
|                  |                  |                | X                       | Y         | Z         |
| 1                | 13               | 0              | 3.418013                | -1.239695 | -1.069080 |
| 2                | 13               | 0              | 1.350696                | -2.692153 | -0.324890 |
| 3                | 13               | 0              | 1.815892                | -0.926402 | 1.666961  |
| 4                | 13               | 0              | 2.190907                | 0.921348  | -0.007114 |
| 5                | 13               | 0              | -0.315681               | -0.549732 | 0.606409  |
| 6                | 6                | 0              | 2.258830                | 2.831206  | -0.506251 |
| 7                | 6                | 0              | 1.307156                | 3.762098  | 0.244251  |

|    |    |   |           |          |           |
|----|----|---|-----------|----------|-----------|
| 8  | 1  | 0 | 2.080233  | 2.894858 | -1.578584 |
| 9  | 1  | 0 | 1.419476  | 4.793384 | -0.078372 |
| 10 | 1  | 0 | 0.269553  | 3.486642 | 0.086447  |
| 11 | 1  | 0 | 1.484569  | 3.738281 | 1.314607  |
| 12 | 1  | 0 | 3.289554  | 3.155008 | -0.370451 |
| 13 | 53 | 0 | -2.639944 | 0.013175 | -0.172479 |

-----  
 Low frequencies (cm<sup>-1</sup>): 19.9122                    31.8322                    42.7904  
                                  56.9281                    73.2536                    102.2965

Al<sub>5</sub> .... C<sub>2</sub>H<sub>3</sub>I (M062X/TZVP, LANL2DZ level of theory)

Optimized geometry of reactant

| -----  |        |        |                         |           |           |  |
|--------|--------|--------|-------------------------|-----------|-----------|--|
| Center | Atomic | Atomic | Coordinates (Angstroms) |           |           |  |
| Number | Number | Type   | X                       | Y         | Z         |  |
| -----  |        |        |                         |           |           |  |
| 1      | 13     | 0      | 3.722700                | 0.710191  | -1.222451 |  |
| 2      | 13     | 0      | 4.657563                | -1.329495 | 0.088787  |  |
| 3      | 13     | 0      | 1.631281                | 1.751676  | -0.451339 |  |
| 4      | 13     | 0      | 2.460599                | -0.469611 | 0.919312  |  |
| 5      | 13     | 0      | 0.376036                | 0.747832  | 1.671593  |  |
| 6      | 53     | 0      | -2.242200               | -0.800604 | -0.278561 |  |
| 7      | 6      | 0      | -3.367434               | 0.896409  | 0.250792  |  |
| 8      | 6      | 0      | -3.000295               | 2.126428  | -0.046681 |  |
| 9      | 1      | 0      | -2.095876               | 2.353427  | -0.597462 |  |
| 10     | 1      | 0      | -3.622552               | 2.958489  | 0.263282  |  |
| 11     | 1      | 0      | -4.264903               | 0.645360  | 0.796507  |  |

-----  
 Low frequencies (cm<sup>-1</sup>): 13.6127                    25.6492                    27.5400  
                                  33.3376                    53.4152                    67.3737

Coordinate of TS

| -----  |        |        |                         |           |           |  |
|--------|--------|--------|-------------------------|-----------|-----------|--|
| Center | Atomic | Atomic | Coordinates (Angstroms) |           |           |  |
| Number | Number | Type   | X                       | Y         | Z         |  |
| -----  |        |        |                         |           |           |  |
| 1      | 13     | 0      | -4.596671               | 1.162625  | 0.132545  |  |
| 2      | 13     | 0      | -5.256573               | -1.316108 | 0.028118  |  |
| 3      | 13     | 0      | -2.193936               | 1.669163  | 0.093282  |  |
| 4      | 13     | 0      | -2.775230               | -0.992283 | -0.017692 |  |
| 5      | 13     | 0      | -0.409968               | -0.325914 | -0.059505 |  |
| 6      | 53     | 0      | 2.282636                | -0.027645 | -0.136912 |  |
| 7      | 6      | 0      | 4.691154                | 0.211445  | -0.172870 |  |
| 8      | 6      | 0      | 5.406818                | -0.337004 | 0.776292  |  |
| 9      | 1      | 0      | 4.961541                | -0.902540 | 1.587738  |  |
| 10     | 1      | 0      | 6.491246                | -0.240104 | 0.780550  |  |
| 11     | 1      | 0      | 5.000576                | 0.793902  | -1.030211 |  |

-----  
 Low frequencies (cm<sup>-1</sup>): -249.4272                    17.4034                    27.9253

35.7010                      51.8600                      77.0572

Optimized geometry after C-I dissociation

| Center<br>Number | Atomic<br>Number | Atomic<br>Type | Coordinates (Angstroms) |           |           |
|------------------|------------------|----------------|-------------------------|-----------|-----------|
|                  |                  |                | X                       | Y         | Z         |
| 1                | 13               | 0              | -3.269237               | -1.234798 | 1.274713  |
| 2                | 13               | 0              | -3.747288               | -1.035183 | -1.116520 |
| 3                | 13               | 0              | -1.184186               | -1.974320 | -0.154979 |
| 4                | 13               | 0              | -1.776051               | 0.726496  | 0.152547  |
| 5                | 13               | 0              | 0.628796                | -0.256899 | -0.183324 |
| 6                | 53               | 0              | 3.112621                | 0.091022  | 0.009200  |
| 7                | 6                | 0              | -2.206657               | 2.636785  | 0.045732  |
| 8                | 6                | 0              | -3.462143               | 3.081990  | -0.044230 |
| 9                | 1                | 0              | -4.315332               | 2.409068  | -0.027820 |
| 10               | 1                | 0              | -3.700344               | 4.139476  | -0.136468 |
| 11               | 1                | 0              | -1.416883               | 3.385766  | 0.025983  |

Low frequencies (cm<sup>-1</sup>): 17.8666                      30.9329                      39.1562  
67.6210                      79.0849                      98.6370

Al<sub>5</sub> .... C<sub>2</sub>H<sub>3</sub>I (B3PW91/TZVP, LANL2DZ level of theory)

Optimized geometry of reactant

| Center<br>Number | Atomic<br>Number | Atomic<br>Type | Coordinates (Angstroms) |           |           |
|------------------|------------------|----------------|-------------------------|-----------|-----------|
|                  |                  |                | X                       | Y         | Z         |
| 1                | 13               | 0              | 4.005041                | 0.707001  | -0.858466 |
| 2                | 13               | 0              | 4.448180                | -1.721677 | -0.099929 |
| 3                | 13               | 0              | 2.047224                | 1.910996  | 0.053826  |
| 4                | 13               | 0              | 2.332158                | -0.742157 | 0.821652  |
| 5                | 13               | 0              | 0.434834                | 0.668544  | 1.705008  |
| 6                | 53               | 0              | -2.045524               | -0.136503 | -0.622680 |
| 7                | 6                | 0              | -3.919130               | 0.195513  | 0.302026  |
| 8                | 6                | 0              | -4.460028               | -0.634110 | 1.172598  |
| 9                | 1                | 0              | -3.988777               | -1.557182 | 1.486920  |
| 10               | 1                | 0              | -5.426856               | -0.392745 | 1.604310  |
| 11               | 1                | 0              | -4.373328               | 1.120979  | -0.024094 |

Low frequencies (cm<sup>-1</sup>): 11.4071                      13.8089                      20.5735  
29.4298                      39.3115                      45.3728

Coordinate of TS

| Center Number | Atomic Number | Atomic Type | Coordinates (Angstroms) |           |           |
|---------------|---------------|-------------|-------------------------|-----------|-----------|
|               |               |             | X                       | Y         | Z         |
| 1             | 13            | 0           | -4.665158               | 1.023501  | 0.082225  |
| 2             | 13            | 0           | -5.204750               | -1.474575 | -0.028083 |
| 3             | 13            | 0           | -2.297784               | 1.731139  | 0.088503  |
| 4             | 13            | 0           | -2.734861               | -1.023015 | -0.037226 |
| 5             | 13            | 0           | -0.432783               | -0.101246 | -0.020258 |
| 6             | 53            | 0           | 2.300456                | 0.064166  | -0.057909 |
| 7             | 6             | 0           | 4.713552                | 0.165009  | -0.104305 |
| 8             | 6             | 0           | 5.434520                | -0.833855 | 0.341581  |
| 9             | 1             | 0           | 4.999048                | -1.741897 | 0.746591  |
| 10            | 1             | 0           | 6.523711                | -0.782824 | 0.319266  |
| 11            | 1             | 0           | 5.024023                | 1.111524  | -0.527434 |

Low frequencies (cm<sup>-1</sup>): -182.6383      12.4962      21.2484  
29.7281      37.9117      52.9171

Optimized geometry after C-I dissociation

| Center Number | Atomic Number | Atomic Type | Coordinates (Angstroms) |           |           |
|---------------|---------------|-------------|-------------------------|-----------|-----------|
|               |               |             | X                       | Y         | Z         |
| 1             | 13            | 0           | -3.297741               | -1.196873 | 1.246501  |
| 2             | 13            | 0           | -3.790638               | -1.063536 | -1.139227 |
| 3             | 13            | 0           | -1.215496               | -2.014296 | -0.087109 |
| 4             | 13            | 0           | -1.799334               | 0.739341  | 0.146002  |
| 5             | 13            | 0           | 0.630119                | -0.301327 | -0.152060 |
| 6             | 53            | 0           | 3.117503                | 0.082430  | -0.001164 |
| 7             | 6             | 0           | -2.135993               | 2.675611  | 0.039444  |
| 8             | 6             | 0           | -3.362105               | 3.202860  | -0.038674 |
| 9             | 1             | 0           | -4.259634               | 2.589024  | -0.020839 |
| 10            | 1             | 0           | -3.531503               | 4.275872  | -0.123337 |
| 11            | 1             | 0           | -1.297784               | 3.372493  | 0.017869  |

Low frequencies (cm<sup>-1</sup>): 28.0287      36.0104      37.7670  
70.9390      81.9523      95.5533

Al<sub>5</sub> .... C<sub>2</sub>H<sub>3</sub>I (BHandHLYP/TZVP, LANL2DZ level of theory)

Optimized geometry of reactant

| Center Number | Atomic Number | Atomic Type | Coordinates (Angstroms) |           |           |
|---------------|---------------|-------------|-------------------------|-----------|-----------|
|               |               |             | X                       | Y         | Z         |
| 1             | 13            | 0           | 4.168097                | 0.335647  | -1.252615 |
| 2             | 13            | 0           | 4.794461                | -1.566944 | 0.396486  |

|    |    |   |           |           |           |
|----|----|---|-----------|-----------|-----------|
| 3  | 13 | 0 | 2.217717  | 1.772200  | -0.776177 |
| 4  | 13 | 0 | 2.734239  | -0.263623 | 1.053532  |
| 5  | 13 | 0 | 0.817321  | 1.360589  | 1.391970  |
| 6  | 53 | 0 | -2.341089 | -0.606383 | -0.306666 |
| 7  | 6  | 0 | -4.073741 | 0.160158  | 0.595496  |
| 8  | 6  | 0 | -4.755733 | 1.174452  | 0.124435  |
| 9  | 1  | 0 | -4.480217 | 1.701825  | -0.770332 |
| 10 | 1  | 0 | -5.637320 | 1.508584  | 0.645370  |
| 11 | 1  | 0 | -4.341758 | -0.372084 | 1.487143  |

-----  
 Low frequencies (cm<sup>-1</sup>): 8.0325                    12.1599                    16.4580  
                                          17.3550                    24.2000                    37.2995

#### Coordinate of TS

| Center<br>Number | Atomic<br>Number | Atomic<br>Type | Coordinates (Angstroms) |           |           |
|------------------|------------------|----------------|-------------------------|-----------|-----------|
|                  |                  |                | X                       | Y         | Z         |
| 1                | 13               | 0              | -4.690276               | 0.980594  | 0.083117  |
| 2                | 13               | 0              | -5.241641               | -1.521399 | -0.024406 |
| 3                | 13               | 0              | -2.351462               | 1.783035  | 0.087574  |
| 4                | 13               | 0              | -2.757455               | -1.007640 | -0.037205 |
| 5                | 13               | 0              | -0.474937               | -0.000706 | -0.023284 |
| 6                | 53               | 0              | 2.347967                | 0.048029  | -0.061676 |
| 7                | 6                | 0              | 4.700489                | 0.152394  | -0.084776 |
| 8                | 6                | 0              | 5.422821                | -0.843064 | 0.347140  |
| 9                | 1                | 0              | 4.992875                | -1.751933 | 0.731130  |
| 10               | 1                | 0              | 6.501790                | -0.783509 | 0.331607  |
| 11               | 1                | 0              | 5.028245                | 1.093406  | -0.483431 |

-----  
 Low frequencies (cm<sup>-1</sup>): -262.6463                    12.7404                    19.5323  
                                          26.0887                    41.0760                    59.0175

#### Optimized geometry after C-I dissociation

| Center<br>Number | Atomic<br>Number | Atomic<br>Type | Coordinates (Angstroms) |           |           |
|------------------|------------------|----------------|-------------------------|-----------|-----------|
|                  |                  |                | X                       | Y         | Z         |
| 1                | 13               | 0              | 3.324563                | -1.164512 | -1.201624 |
| 2                | 13               | 0              | 3.755699                | -1.156236 | 1.208608  |
| 3                | 13               | 0              | 1.207454                | -2.007092 | -0.012137 |
| 4                | 13               | 0              | 1.794710                | 0.775588  | -0.162672 |
| 5                | 13               | 0              | -0.636024               | -0.283753 | 0.040614  |
| 6                | 53               | 0              | -3.123136               | 0.081528  | 0.024507  |
| 7                | 6                | 0              | 2.176625                | 2.691648  | -0.017347 |
| 8                | 6                | 0              | 3.404090                | 3.194666  | 0.046706  |
| 9                | 1                | 0              | 4.284113                | 2.572680  | 0.003444  |
| 10               | 1                | 0              | 3.591815                | 4.254090  | 0.144210  |
| 11               | 1                | 0              | 1.362758                | 3.402439  | 0.031050  |

Low frequencies (cm<sup>-1</sup>): 29.2386                    38.9461                    41.0028  
                                          67.0757                    86.1724                    91.7303

Al<sub>5</sub> .... C<sub>6</sub>H<sub>5</sub>I (M062X/TZVP, LANL2DZ level of theory)

Optimized geometry of reactant

| Center Number | Atomic Number | Atomic Type | Coordinates (Angstroms) |           |           |
|---------------|---------------|-------------|-------------------------|-----------|-----------|
|               |               |             | X                       | Y         | Z         |
| 1             | 13            | 0           | -3.099418               | 0.765918  | 1.707937  |
| 2             | 13            | 0           | -2.628560               | 2.501474  | -0.216821 |
| 3             | 13            | 0           | -3.075027               | -1.612801 | 0.973927  |
| 4             | 13            | 0           | -3.515625               | 0.284743  | -0.985721 |
| 5             | 13            | 0           | -2.553930               | -1.955673 | -1.588202 |
| 6             | 6             | 0           | 2.628736                | 0.002065  | 0.015011  |
| 7             | 6             | 0           | 3.312407                | 0.786551  | -0.902051 |
| 8             | 6             | 0           | 4.701990                | 0.780875  | -0.898765 |
| 9             | 6             | 0           | 5.398053                | -0.002899 | 0.011402  |
| 10            | 6             | 0           | 4.701587                | -0.784178 | 0.923407  |
| 11            | 6             | 0           | 3.312018                | -0.784964 | 0.930189  |
| 12            | 1             | 0           | 2.771270                | 1.395970  | -1.613951 |
| 13            | 1             | 0           | 5.238636                | 1.392124  | -1.613420 |
| 14            | 1             | 0           | 6.480295                | -0.004871 | 0.009965  |
| 15            | 1             | 0           | 5.237909                | -1.397433 | 1.636592  |
| 16            | 1             | 0           | 2.770550                | -1.392549 | 1.643391  |
| 17            | 53            | 0           | 0.500299                | 0.004424  | 0.016561  |

Low frequencies (cm<sup>-1</sup>): 19.6756                    26.7440                    28.2780  
                                          36.9770                    42.2153                    47.6542

Coordinate of TS

| Center Number | Atomic Number | Atomic Type | Coordinates (Angstroms) |           |           |
|---------------|---------------|-------------|-------------------------|-----------|-----------|
|               |               |             | X                       | Y         | Z         |
| 1             | 13            | 0           | -5.598796               | 1.300321  | 0.265476  |
| 2             | 13            | 0           | -6.412692               | -1.100446 | -0.150405 |
| 3             | 13            | 0           | -3.168504               | 1.647941  | 0.292815  |
| 4             | 13            | 0           | -3.916288               | -0.929317 | -0.171174 |
| 5             | 13            | 0           | -1.512988               | -0.426796 | -0.106689 |
| 6             | 6             | 0           | 3.593122                | 0.007541  | 0.003957  |
| 7             | 6             | 0           | 4.144779                | 1.209339  | -0.381108 |
| 8             | 6             | 0           | 5.532239                | 1.333728  | -0.338275 |
| 9             | 6             | 0           | 6.317156                | 0.268332  | 0.084825  |
| 10            | 6             | 0           | 5.724969                | -0.928498 | 0.468189  |
| 11            | 6             | 0           | 4.338934                | -1.068810 | 0.430502  |
| 12            | 1             | 0           | 3.526062                | 2.036031  | -0.707887 |
| 13            | 1             | 0           | 5.995825                | 2.266414  | -0.636641 |

|    |    |   |          |           |           |
|----|----|---|----------|-----------|-----------|
| 14 | 1  | 0 | 7.394302 | 0.371395  | 0.115763  |
| 15 | 1  | 0 | 6.338431 | -1.758455 | 0.797678  |
| 16 | 1  | 0 | 3.868641 | -1.997868 | 0.727858  |
| 17 | 53 | 0 | 1.186604 | -0.230933 | -0.067842 |

-----  
 Low frequencies (cm<sup>-1</sup>): -172.2662                      5.0511                      10.1157  
                                  21.8960                      25.4086                      51.6032

Optimized geometry after C-I dissociation

| -----  |        |        |                         |           |           |  |
|--------|--------|--------|-------------------------|-----------|-----------|--|
| Center | Atomic | Atomic | Coordinates (Angstroms) |           |           |  |
| Number | Number | Type   | X                       | Y         | Z         |  |
| -----  |        |        |                         |           |           |  |
| 1      | 13     | 0      | -0.273528               | 3.282685  | 0.405043  |  |
| 2      | 13     | 0      | -0.232237               | 1.460275  | 2.185707  |  |
| 3      | 13     | 0      | 0.034583                | 2.037137  | -1.777530 |  |
| 4      | 13     | 0      | 1.262701                | 0.500350  | 0.136838  |  |
| 5      | 13     | 0      | -1.220109               | 0.381710  | -0.061052 |  |
| 6      | 6      | 0      | 3.012494                | -0.370476 | 0.053943  |  |
| 7      | 6      | 0      | 3.236984                | -1.654042 | 0.568157  |  |
| 8      | 6      | 0      | 4.486910                | -2.254026 | 0.488531  |  |
| 9      | 6      | 0      | 5.543773                | -1.578310 | -0.109506 |  |
| 10     | 6      | 0      | 5.347688                | -0.303643 | -0.625430 |  |
| 11     | 6      | 0      | 4.094741                | 0.290242  | -0.541523 |  |
| 12     | 1      | 0      | 2.425331                | -2.200679 | 1.038400  |  |
| 13     | 1      | 0      | 4.637718                | -3.248144 | 0.891375  |  |
| 14     | 1      | 0      | 6.519194                | -2.044615 | -0.173827 |  |
| 15     | 1      | 0      | 6.170047                | 0.225812  | -1.091052 |  |
| 16     | 1      | 0      | 3.966088                | 1.288492  | -0.951374 |  |
| 17     | 53     | 0      | -3.252295               | -1.044964 | -0.481350 |  |

-----  
 Low frequencies (cm<sup>-1</sup>): 27.0171                      32.6676                      54.3337  
                                  55.0853                      94.6787                      121.4927

Al<sub>5</sub> .... C<sub>6</sub>H<sub>5</sub>I (B3PW91/TZVP, LANL2DZ level of theory)

Optimized geometry of reactant

| -----  |        |        |                         |           |           |  |
|--------|--------|--------|-------------------------|-----------|-----------|--|
| Center | Atomic | Atomic | Coordinates (Angstroms) |           |           |  |
| Number | Number | Type   | X                       | Y         | Z         |  |
| -----  |        |        |                         |           |           |  |
| 1      | 13     | 0      | -4.928618               | 0.907708  | -0.605926 |  |
| 2      | 13     | 0      | -5.484607               | -1.492825 | 0.156844  |  |
| 3      | 13     | 0      | -2.815864               | 1.945626  | 0.152626  |  |
| 4      | 13     | 0      | -3.227825               | -0.694876 | 0.898814  |  |
| 5      | 13     | 0      | -1.158629               | 0.551842  | 1.633640  |  |
| 6      | 6      | 0      | 2.965934                | -0.093084 | -0.103683 |  |



|    |    |   |          |           |           |
|----|----|---|----------|-----------|-----------|
| 7  | 6  | 0 | 3.588574 | -1.139741 | 0.559348  |
| 8  | 6  | 0 | 4.878062 | -0.954612 | 1.045043  |
| 9  | 6  | 0 | 5.529000 | 0.258993  | 0.866936  |
| 10 | 6  | 0 | 4.888979 | 1.295074  | 0.199652  |
| 11 | 6  | 0 | 3.599549 | 1.125932  | -0.292047 |
| 12 | 1  | 0 | 3.082642 | -2.086568 | 0.699069  |
| 13 | 1  | 0 | 5.370841 | -1.768506 | 1.564873  |
| 14 | 1  | 0 | 6.534296 | 0.397292  | 1.247624  |
| 15 | 1  | 0 | 5.390737 | 2.245473  | 0.056483  |
| 16 | 1  | 0 | 3.102559 | 1.934908  | -0.812331 |
| 17 | 53 | 0 | 0.996611 | -0.368021 | -0.858023 |

-----  
 Low frequencies (cm<sup>-1</sup>): 6.0590                      7.6021                      10.7369  
                                          20.7935                      31.3843                      42.1151

#### Coordinate of TS

| Center<br>Number | Atomic<br>Number | Atomic<br>Type | Coordinates (Angstroms) |           |           |
|------------------|------------------|----------------|-------------------------|-----------|-----------|
|                  |                  |                | X                       | Y         | Z         |
| 1                | 13               | 0              | 5.687282                | 1.184624  | 0.096794  |
| 2                | 13               | 0              | 6.391936                | -1.265498 | -0.121121 |
| 3                | 13               | 0              | 3.277290                | 1.725179  | 0.155667  |
| 4                | 13               | 0              | 3.897652                | -0.981167 | -0.089228 |
| 5                | 13               | 0              | 1.535942                | -0.225018 | -0.010659 |
| 6                | 6                | 0              | -3.613346               | -0.022341 | -0.006124 |
| 7                | 6                | 0              | -4.197912               | 1.210976  | -0.193498 |
| 8                | 6                | 0              | -5.590503               | 1.281040  | -0.192314 |
| 9                | 6                | 0              | -6.348899               | 0.131555  | -0.006145 |
| 10               | 6                | 0              | -5.724239               | -1.095724 | 0.179752  |
| 11               | 6                | 0              | -4.332488               | -1.182330 | 0.181090  |
| 12               | 1                | 0              | -3.601868               | 2.104618  | -0.338132 |
| 13               | 1                | 0              | -6.078274               | 2.239273  | -0.337638 |
| 14               | 1                | 0              | -7.431317               | 0.192365  | -0.006132 |
| 15               | 1                | 0              | -6.316127               | -1.993405 | 0.324817  |
| 16               | 1                | 0              | -3.840414               | -2.137067 | 0.325791  |
| 17               | 53               | 0              | -1.210547               | -0.151706 | -0.002909 |

-----  
 Low frequencies (cm<sup>-1</sup>): -128.5324                      6.5284                      8.2538  
                                          13.8929                      32.2110                      46.6585

#### Optimized geometry after C-I dissociation

| Center<br>Number | Atomic<br>Number | Atomic<br>Type | Coordinates (Angstroms) |          |           |
|------------------|------------------|----------------|-------------------------|----------|-----------|
|                  |                  |                | X                       | Y        | Z         |
| 1                | 13               | 0              | 0.277768                | 3.422327 | 0.000918  |
| 2                | 13               | 0              | 0.114800                | 1.838491 | -1.989212 |
| 3                | 13               | 0              | 0.115715                | 1.837270 | 1.990092  |
| 4                | 13               | 0              | -1.263934               | 0.530015 | 0.000569  |

|    |    |   |           |           |           |
|----|----|---|-----------|-----------|-----------|
| 5  | 13 | 0 | 1.241151  | 0.395062  | 0.000220  |
| 6  | 6  | 0 | -3.002737 | -0.384910 | 0.000187  |
| 7  | 6  | 0 | -3.116674 | -1.782841 | 0.002019  |
| 8  | 6  | 0 | -4.358464 | -2.404656 | 0.001716  |
| 9  | 6  | 0 | -5.519323 | -1.639349 | -0.000408 |
| 10 | 6  | 0 | -5.433979 | -0.252722 | -0.002243 |
| 11 | 6  | 0 | -4.188650 | 0.364072  | -0.001933 |
| 12 | 1  | 0 | -2.224888 | -2.403549 | 0.003752  |
| 13 | 1  | 0 | -4.422455 | -3.487597 | 0.003151  |
| 14 | 1  | 0 | -6.489498 | -2.124211 | -0.000637 |
| 15 | 1  | 0 | -6.337534 | 0.347675  | -0.003910 |
| 16 | 1  | 0 | -4.148856 | 1.450733  | -0.003387 |
| 17 | 53 | 0 | 3.226994  | -1.160033 | -0.000540 |

-----  
 Low frequencies (cm<sup>-1</sup>): 12.0124                    22.8492                    32.5859  
                                  54.7408                    59.1896                    86.7048

Al<sub>5</sub> .... C<sub>6</sub>H<sub>5</sub>I (BHandHLYP/TZVP, LANL2DZ level of theory)

Optimized geometry of reactant

| Center<br>Number | Atomic<br>Number | Atomic<br>Type | Coordinates (Angstroms) |           |           |
|------------------|------------------|----------------|-------------------------|-----------|-----------|
|                  |                  |                | X                       | Y         | Z         |
| 1                | 13               | 0              | 5.175590                | 0.534125  | -1.037958 |
| 2                | 13               | 0              | 5.817986                | -1.146122 | 0.829527  |
| 3                | 13               | 0              | 3.038848                | 1.762609  | -0.894995 |
| 4                | 13               | 0              | 3.563432                | -0.056717 | 1.147912  |
| 5                | 13               | 0              | 1.460449                | 1.360968  | 1.150392  |
| 6                | 6                | 0              | -3.121685               | -0.095495 | -0.020547 |
| 7                | 6                | 0              | -3.683141               | -0.374497 | 1.208784  |
| 8                | 6                | 0              | -4.877872               | 0.227171  | 1.558115  |
| 9                | 6                | 0              | -5.502765               | 1.097738  | 0.686961  |
| 10               | 6                | 0              | -4.929842               | 1.367584  | -0.540369 |
| 11               | 6                | 0              | -3.735335               | 0.772156  | -0.900901 |
| 12               | 1                | 0              | -3.200814               | -1.050932 | 1.889102  |
| 13               | 1                | 0              | -5.316872               | 0.011009  | 2.515641  |
| 14               | 1                | 0              | -6.431587               | 1.563261  | 0.962958  |
| 15               | 1                | 0              | -5.409693               | 2.043925  | -1.224942 |
| 16               | 1                | 0              | -3.293682               | 0.984823  | -1.856311 |
| 17               | 53               | 0              | -1.301424               | -1.008175 | -0.561738 |

-----  
 Low frequencies (cm<sup>-1</sup>): 1.6687                    5.5421                    10.5134  
                                  12.9911                    18.6148                    24.8233

Coordinate of TS

| Center<br>Number | Atomic<br>Number | Atomic<br>Type | Coordinates (Angstroms) |   |   |
|------------------|------------------|----------------|-------------------------|---|---|
|                  |                  |                | X                       | Y | Z |

|    |    |   |           |           |           |
|----|----|---|-----------|-----------|-----------|
| 1  | 13 | 0 | -5.731240 | 1.022396  | -0.435098 |
| 2  | 13 | 0 | -6.403625 | -1.243149 | 0.561049  |
| 3  | 13 | 0 | -3.355652 | 1.654410  | -0.697847 |
| 4  | 13 | 0 | -3.897467 | -0.877373 | 0.420449  |
| 5  | 13 | 0 | -1.566414 | -0.057236 | 0.074547  |
| 6  | 6  | 0 | 3.611834  | 0.062680  | 0.073615  |
| 7  | 6  | 0 | 4.206087  | 1.282755  | -0.130323 |
| 8  | 6  | 0 | 5.590274  | 1.345049  | -0.145198 |
| 9  | 6  | 0 | 6.340754  | 0.199440  | 0.041386  |
| 10 | 6  | 0 | 5.713192  | -1.015217 | 0.244213  |
| 11 | 6  | 0 | 4.329704  | -1.091779 | 0.261530  |
| 12 | 1  | 0 | 3.619700  | 2.171687  | -0.275148 |
| 13 | 1  | 0 | 6.078376  | 2.290782  | -0.303080 |
| 14 | 1  | 0 | 7.414551  | 0.253181  | 0.028889  |
| 15 | 1  | 0 | 6.296729  | -1.907342 | 0.389674  |
| 16 | 1  | 0 | 3.838490  | -2.034541 | 0.419016  |
| 17 | 53 | 0 | 1.266505  | -0.055824 | 0.099368  |

Low frequencies (cm<sup>-1</sup>): -200.5059                      7.5229                      10.2585  
12.1125                      35.3181                      49.6193

Optimized geometry after C-I dissociation

| Center Number | Atomic Number | Atomic Type | Coordinates (Angstroms) |           |           |
|---------------|---------------|-------------|-------------------------|-----------|-----------|
|               |               |             | X                       | Y         | Z         |
| 1             | 13            | 0           | -0.462671               | 3.453258  | 0.502456  |
| 2             | 13            | 0           | -0.204009               | 1.519900  | 2.184956  |
| 3             | 13            | 0           | -0.107319               | 2.179784  | -1.686690 |
| 4             | 13            | 0           | 1.309621                | 0.603214  | 0.051026  |
| 5             | 13            | 0           | -1.192371               | 0.321697  | -0.074460 |
| 6             | 6             | 0           | 3.043558                | -0.304595 | -0.010131 |
| 7             | 6             | 0           | 3.283001                | -1.476942 | 0.707532  |
| 8             | 6             | 0           | 4.507247                | -2.115667 | 0.658419  |
| 9             | 6             | 0           | 5.528161                | -1.592182 | -0.112353 |
| 10            | 6             | 0           | 5.319870                | -0.430851 | -0.831805 |
| 11            | 6             | 0           | 4.092181                | 0.201321  | -0.778541 |
| 12            | 1             | 0           | 2.504850                | -1.905792 | 1.317357  |
| 13            | 1             | 0           | 4.665384                | -3.019638 | 1.219892  |
| 14            | 1             | 0           | 6.482301                | -2.087244 | -0.151958 |
| 15            | 1             | 0           | 6.111813                | -0.019821 | -1.432942 |
| 16            | 1             | 0           | 3.957348                | 1.104970  | -1.351097 |
| 17            | 53            | 0           | -2.998159               | -1.420368 | -0.300705 |

Low frequencies (cm<sup>-1</sup>): 14.6645                      23.2099                      29.7131  
52.3532                      60.1420                      84.5540

Al<sub>6</sub> .... C<sub>2</sub>H<sub>5</sub>I (M062X/TZVP, LANL2DZ level of theory)

Optimized geometry of reactant

| Center Number | Atomic Number | Atomic Type | Coordinates (Angstroms) |           |           |
|---------------|---------------|-------------|-------------------------|-----------|-----------|
|               |               |             | X                       | Y         | Z         |
| 1             | 13            | 0           | 3.156980                | -0.290996 | 1.489440  |
| 2             | 13            | 0           | 0.884359                | 0.873943  | 1.401180  |
| 3             | 13            | 0           | 1.465472                | -1.772002 | 0.251653  |
| 4             | 13            | 0           | 3.124133                | -0.612093 | -1.354907 |
| 5             | 13            | 0           | 0.789171                | 0.462993  | -1.491420 |
| 6             | 13            | 0           | 2.556925                | 1.905611  | -0.276212 |
| 7             | 6             | 0           | -2.936883               | 1.155282  | 0.632284  |
| 8             | 6             | 0           | -2.692147               | 2.275890  | -0.346287 |
| 9             | 1             | 0           | -2.476930               | 1.329689  | 1.600978  |
| 10            | 1             | 0           | -3.143259               | 3.191722  | 0.044054  |
| 11            | 1             | 0           | -1.624553               | 2.458790  | -0.478618 |
| 12            | 1             | 0           | -3.134902               | 2.062886  | -1.319085 |
| 13            | 1             | 0           | -3.986705               | 0.907502  | 0.753551  |
| 14            | 53            | 0           | -2.029453               | -0.715369 | -0.048555 |

Low frequencies (cm<sup>-1</sup>): 20.8381                      29.0251                      42.9295  
50.6311                      63.2304                      72.5669

Coordinate of TS

| Center Number | Atomic Number | Atomic Type | Coordinates (Angstroms) |           |           |
|---------------|---------------|-------------|-------------------------|-----------|-----------|
|               |               |             | X                       | Y         | Z         |
| 1             | 13            | 0           | -1.631749               | -1.855813 | 0.000266  |
| 2             | 13            | 0           | -0.445696               | 0.254222  | -1.430829 |
| 3             | 13            | 0           | -0.445906               | 0.254942  | 1.431098  |
| 4             | 13            | 0           | -2.957260               | -0.130610 | 1.497558  |
| 5             | 13            | 0           | -1.923180               | 1.976843  | -0.000527 |
| 6             | 13            | 0           | -2.957139               | -0.130845 | -1.497574 |
| 7             | 6             | 0           | 2.877170                | 1.773983  | -0.000040 |
| 8             | 6             | 0           | 1.742180                | 2.636231  | 0.000080  |
| 9             | 1             | 0           | 3.405890                | 1.557586  | -0.917326 |
| 10            | 1             | 0           | 1.616442                | 3.233557  | 0.900574  |
| 11            | 1             | 0           | 1.616648                | 3.234065  | -0.900111 |
| 12            | 1             | 0           | 0.728937                | 1.992414  | -0.000276 |
| 13            | 1             | 0           | 3.406073                | 1.557518  | 0.917122  |
| 14            | 53            | 0           | 1.815132                | -0.808114 | -0.000003 |

Low frequencies (cm<sup>-1</sup>): -131.9149                      41.2227                      42.1908  
68.2282                      77.6346                      98.4333

Optimized geometry after C-I dissociation

| Center Number | Atomic Number | Atomic Type | Coordinates (Angstroms) |   |   |
|---------------|---------------|-------------|-------------------------|---|---|
|               |               |             | X                       | Y | Z |

|    |    |   |           |           |           |
|----|----|---|-----------|-----------|-----------|
| 1  | 13 | 0 | -1.094323 | 0.348288  | 1.272631  |
| 2  | 13 | 0 | -3.589207 | -0.152739 | 0.064622  |
| 3  | 13 | 0 | 1.111049  | 0.360699  | 0.021181  |
| 4  | 13 | 0 | -0.115168 | 2.539988  | -0.004402 |
| 5  | 13 | 0 | -1.411729 | 0.093723  | -1.200119 |
| 6  | 13 | 0 | -2.773420 | 2.236842  | -0.242109 |
| 7  | 6  | 0 | -5.151515 | -1.344610 | 0.209088  |
| 8  | 6  | 0 | -4.795960 | -2.817718 | -0.039952 |
| 9  | 1  | 0 | -5.905561 | -1.008030 | -0.508297 |
| 10 | 1  | 0 | -5.674519 | -3.462181 | 0.035457  |
| 11 | 1  | 0 | -4.368356 | -2.963795 | -1.033910 |
| 12 | 1  | 0 | -4.062523 | -3.182209 | 0.682402  |
| 13 | 1  | 0 | -5.597683 | -1.222484 | 1.200130  |
| 14 | 53 | 0 | 3.347010  | -0.795243 | 0.035047  |

Low frequencies (cm<sup>-1</sup>): 31.1868                      32.7548                      55.8820  
62.9285                      88.7531                      102.6903

Al<sub>6</sub> .... C<sub>2</sub>H<sub>5</sub>I (B3PW91/TZVP, LANL2DZ level of theory)

Optimized geometry of reactant

| Center Number | Atomic Number | Atomic Type | Coordinates (Angstroms) |           |           |
|---------------|---------------|-------------|-------------------------|-----------|-----------|
|               |               |             | X                       | Y         | Z         |
| 1             | 13            | 0           | 3.195975                | -0.357481 | 1.446821  |
| 2             | 13            | 0           | 0.953920                | 0.861808  | 1.493918  |
| 3             | 13            | 0           | 1.494632                | -1.773932 | 0.161156  |
| 4             | 13            | 0           | 3.056039                | -0.504701 | -1.463551 |
| 5             | 13            | 0           | 0.711515                | 0.566524  | -1.404170 |
| 6             | 13            | 0           | 2.575249                | 1.931451  | -0.227131 |
| 7             | 6             | 0           | -3.100704               | 1.059209  | 0.612928  |
| 8             | 6             | 0           | -2.933750               | 2.214175  | -0.333102 |
| 9             | 1             | 0           | -2.703025               | 1.252964  | 1.605907  |
| 10            | 1             | 0           | -3.487227               | 3.073795  | 0.060403  |
| 11            | 1             | 0           | -1.886432               | 2.511145  | -0.426073 |
| 12            | 1             | 0           | -3.323376               | 1.988371  | -1.326810 |
| 13            | 1             | 0           | -4.120224               | 0.687609  | 0.678375  |
| 14            | 53            | 0           | -1.964307               | -0.727582 | -0.044572 |

Low frequencies (cm<sup>-1</sup>): 18.7914                      26.3833                      36.4133  
40.2529                      59.4073                      68.8871

Coordinate of TS

| Center Number | Atomic Number | Atomic Type | Coordinates (Angstroms) |           |          |
|---------------|---------------|-------------|-------------------------|-----------|----------|
|               |               |             | X                       | Y         | Z        |
| 1             | 13            | 0           | -2.825833               | -1.061471 | 1.236123 |

|    |    |   |           |           |           |
|----|----|---|-----------|-----------|-----------|
| 2  | 13 | 0 | -1.424875 | -1.514559 | -0.919261 |
| 3  | 13 | 0 | -0.450959 | -0.023460 | 1.288778  |
| 4  | 13 | 0 | -2.509122 | 1.571676  | 1.132046  |
| 5  | 13 | 0 | -1.018013 | 1.508796  | -1.042293 |
| 6  | 13 | 0 | -3.172640 | 0.256869  | -1.494896 |
| 7  | 6  | 0 | 3.385646  | 1.290592  | 0.238057  |
| 8  | 6  | 0 | 2.587467  | 2.464963  | -0.151527 |
| 9  | 1  | 0 | 4.169119  | 0.942446  | -0.424303 |
| 10 | 1  | 0 | 3.016872  | 3.374800  | 0.288467  |
| 11 | 1  | 0 | 2.536007  | 2.594295  | -1.232993 |
| 12 | 1  | 0 | 1.554262  | 2.412668  | 0.236372  |
| 13 | 1  | 0 | 3.584988  | 1.136599  | 1.292647  |
| 14 | 53 | 0 | 1.839978  | -0.803513 | -0.061997 |

-----  
Low frequencies (cm<sup>-1</sup>): -84.3360                      31.9001                      41.7371  
                                 44.9275                      81.4325                      86.2236

Optimized geometry after C-I dissociation

| Center<br>Number | Atomic<br>Number | Atomic<br>Type | Coordinates (Angstroms) |           |           |
|------------------|------------------|----------------|-------------------------|-----------|-----------|
|                  |                  |                | X                       | Y         | Z         |
| 1                | 13               | 0              | -1.011019               | 0.296278  | 1.270253  |
| 2                | 13               | 0              | -3.546560               | -0.198252 | 0.029419  |
| 3                | 13               | 0              | 1.192614                | 0.435280  | 0.017155  |
| 4                | 13               | 0              | -0.106678               | 2.580891  | 0.074987  |
| 5                | 13               | 0              | -1.355689               | 0.059079  | -1.207456 |
| 6                | 13               | 0              | -2.740086               | 2.209343  | -0.201864 |
| 7                | 6                | 0              | -5.149834               | -1.357304 | 0.172931  |
| 8                | 6                | 0              | -4.891570               | -2.855463 | -0.019543 |
| 9                | 1                | 0              | -5.874987               | -0.996024 | -0.565808 |
| 10               | 1                | 0              | -5.814681               | -3.436364 | 0.072836  |
| 11               | 1                | 0              | -4.471068               | -3.071174 | -1.005144 |
| 12               | 1                | 0              | -4.189509               | -3.246653 | 0.721672  |
| 13               | 1                | 0              | -5.605493               | -1.170681 | 1.152497  |
| 14               | 53               | 0              | 3.482653                | -0.618425 | -0.020166 |

-----  
Low frequencies (cm<sup>-1</sup>): 18.6634                      32.0345                      50.3523  
                                 63.4168                      83.4248                      89.0621

Al<sub>6</sub> .... C<sub>2</sub>H<sub>5</sub>I (BHandHLYP/TZVP, LANL2DZ level of theory)

Optimized geometry of reactant

| Center<br>Number | Atomic<br>Number | Atomic<br>Type | Coordinates (Angstroms) |   |   |
|------------------|------------------|----------------|-------------------------|---|---|
|                  |                  |                | X                       | Y | Z |

|    |    |   |           |           |           |
|----|----|---|-----------|-----------|-----------|
| 1  | 13 | 0 | 3.321593  | -0.307090 | 1.532685  |
| 2  | 13 | 0 | 1.099380  | 0.975032  | 1.397552  |
| 3  | 13 | 0 | 1.607359  | -1.765076 | 0.283425  |
| 4  | 13 | 0 | 3.286821  | -0.698195 | -1.367828 |
| 5  | 13 | 0 | 1.004182  | 0.504528  | -1.533286 |
| 6  | 13 | 0 | 2.799975  | 1.919213  | -0.311593 |
| 7  | 6  | 0 | -3.145287 | 1.119007  | 0.671886  |
| 8  | 6  | 0 | -3.160320 | 2.200190  | -0.372697 |
| 9  | 1  | 0 | -2.573794 | 1.387294  | 1.545147  |
| 10 | 1  | 0 | -3.643560 | 3.081263  | 0.041894  |
| 11 | 1  | 0 | -2.157956 | 2.479401  | -0.672152 |
| 12 | 1  | 0 | -3.711974 | 1.897410  | -1.253714 |
| 13 | 1  | 0 | -4.132614 | 0.801419  | 0.964327  |
| 14 | 53 | 0 | -2.198066 | -0.711912 | -0.045907 |

-----  
 Low frequencies (cm<sup>-1</sup>): 7.5913                    28.0395                    31.0424  
                                  37.2093                    40.2571                    50.3173

#### Coordinate of TS

| Center<br>Number | Atomic<br>Number | Atomic<br>Type | Coordinates (Angstroms) |           |           |
|------------------|------------------|----------------|-------------------------|-----------|-----------|
|                  |                  |                | X                       | Y         | Z         |
| 1                | 13               | 0              | 1.905486                | -1.558858 | -1.061082 |
| 2                | 13               | 0              | 0.255438                | -0.459822 | 0.895350  |
| 3                | 13               | 0              | 1.146756                | 1.433589  | -0.977941 |
| 4                | 13               | 0              | 3.451965                | 0.466279  | -1.386277 |
| 5                | 13               | 0              | 2.166780                | 1.399423  | 1.444505  |
| 6                | 13               | 0              | 2.676194                | -1.152603 | 1.441247  |
| 7                | 6                | 0              | -2.976223               | 2.008595  | 0.071071  |
| 8                | 6                | 0              | -1.801669               | 2.798091  | 0.018300  |
| 9                | 1                | 0              | -3.414550               | 1.722819  | 1.006719  |
| 10               | 1                | 0              | -1.720709               | 3.417143  | -0.863905 |
| 11               | 1                | 0              | -1.593287               | 3.356454  | 0.920883  |
| 12               | 1                | 0              | -0.836385               | 2.116877  | -0.055746 |
| 13               | 1                | 0              | -3.551499               | 1.806356  | -0.810935 |
| 14               | 53               | 0              | -2.095288               | -0.809884 | -0.101107 |

-----  
 Low frequencies (cm<sup>-1</sup>): -111.4255                    21.2878                    42.1379  
                                  53.8026                    70.7575                    78.6084

#### Optimized geometry after C-I dissociation

| Center<br>Number | Atomic<br>Number | Atomic<br>Type | Coordinates (Angstroms) |           |          |
|------------------|------------------|----------------|-------------------------|-----------|----------|
|                  |                  |                | X                       | Y         | Z        |
| 1                | 13               | 0              | -1.017311               | 0.231434  | 1.262439 |
| 2                | 13               | 0              | -3.519073               | -0.188603 | 0.013578 |
| 3                | 13               | 0              | 1.180880                | 0.442308  | 0.031728 |
| 4                | 13               | 0              | -0.116743               | 2.569210  | 0.050962 |

|    |    |   |           |           |           |
|----|----|---|-----------|-----------|-----------|
| 5  | 13 | 0 | -1.327860 | 0.031920  | -1.211779 |
| 6  | 13 | 0 | -2.730675 | 2.224599  | -0.157659 |
| 7  | 6  | 0 | -5.117812 | -1.335825 | 0.152742  |
| 8  | 6  | 0 | -4.865170 | -2.834377 | -0.016689 |
| 9  | 1  | 0 | -5.832024 | -0.991235 | -0.592462 |
| 10 | 1  | 0 | -5.784156 | -3.406322 | 0.073185  |
| 11 | 1  | 0 | -4.438227 | -3.061304 | -0.988196 |
| 12 | 1  | 0 | -4.176688 | -3.213830 | 0.731803  |
| 13 | 1  | 0 | -5.583406 | -1.142878 | 1.117188  |
| 14 | 53 | 0 | 3.464388  | -0.607632 | -0.019214 |

-----  
 Low frequencies (cm<sup>-1</sup>): 21.1415                    35.4164                    54.4932  
                                  62.6889                    89.3295                    93.1549

Al<sub>6</sub> .... C<sub>2</sub>H<sub>3</sub>I (M062X/TZVP, LANL2DZ level of theory)

Optimized geometry of reactant

| Center<br>Number | Atomic<br>Number | Atomic<br>Type | Coordinates (Angstroms) |           |           |
|------------------|------------------|----------------|-------------------------|-----------|-----------|
|                  |                  |                | X                       | Y         | Z         |
| 1                | 13               | 0              | -2.597721               | 1.961298  | 0.156181  |
| 2                | 13               | 0              | -0.916889               | 0.560343  | 1.524229  |
| 3                | 13               | 0              | -0.900620               | 0.815138  | -1.415997 |
| 4                | 13               | 0              | -3.209378               | -0.288974 | -1.485026 |
| 5                | 13               | 0              | -1.557545               | -1.746498 | -0.156703 |
| 6                | 13               | 0              | -3.231022               | -0.528918 | 1.373845  |
| 7                | 53               | 0              | 2.072576                | -0.644433 | -0.000830 |
| 8                | 6                | 0              | 2.742884                | 1.358398  | 0.050707  |
| 9                | 6                | 0              | 4.010905                | 1.698686  | -0.037353 |
| 10               | 1                | 0              | 4.810024                | 0.976837  | -0.142985 |
| 11               | 1                | 0              | 4.279070                | 2.748658  | -0.003650 |
| 12               | 1                | 0              | 1.912930                | 2.045917  | 0.155622  |

-----  
 Low frequencies (cm<sup>-1</sup>): 9.8717                    39.7028                    41.6846  
                                  46.0126                    62.5104                    70.0066

Coordinate of TS

| Center<br>Number | Atomic<br>Number | Atomic<br>Type | Coordinates (Angstroms) |           |           |
|------------------|------------------|----------------|-------------------------|-----------|-----------|
|                  |                  |                | X                       | Y         | Z         |
| 1                | 13               | 0              | -2.430867               | 1.892268  | -0.635412 |
| 2                | 13               | 0              | -0.791325               | 1.179867  | 1.268764  |
| 3                | 13               | 0              | -0.625452               | 0.233276  | -1.491337 |
| 4                | 13               | 0              | -3.023028               | -0.678178 | -1.281082 |
| 5                | 13               | 0              | -1.423500               | -1.599116 | 0.552896  |
| 6                | 13               | 0              | -3.075051               | 0.096099  | 1.524726  |
| 7                | 53               | 0              | 1.753546                | -0.746992 | 0.017464  |
| 8                | 6                | 0              | 2.950216                | 1.560545  | -0.039579 |



|    |   |   |          |          |           |
|----|---|---|----------|----------|-----------|
| 9  | 6 | 0 | 4.244083 | 1.658445 | 0.021147  |
| 10 | 1 | 0 | 4.898840 | 0.798529 | 0.088897  |
| 11 | 1 | 0 | 4.706301 | 2.644979 | 0.002900  |
| 12 | 1 | 0 | 2.090991 | 2.218299 | -0.108043 |

-----  
 Low frequencies (cm<sup>-1</sup>): -115.7572                    34.0661                    43.1453  
                                   50.5046                    82.2359                    89.7710

#### Optimized geometry after C-I dissociation

| Center<br>Number | Atomic<br>Number | Atomic<br>Type | Coordinates (Angstroms) |           |           |
|------------------|------------------|----------------|-------------------------|-----------|-----------|
|                  |                  |                | X                       | Y         | Z         |
| 1                | 13               | 0              | 0.103704                | -0.291707 | 1.368842  |
| 2                | 13               | 0              | -1.629955               | -1.065648 | -0.353757 |
| 3                | 13               | 0              | 0.256916                | 0.315321  | -1.405358 |
| 4                | 13               | 0              | -0.430446               | 2.302209  | 0.427115  |
| 5                | 13               | 0              | -1.939371               | 1.603020  | -1.536319 |
| 6                | 13               | 0              | -2.117003               | 0.883771  | 1.772128  |
| 7                | 53               | 0              | 2.555031                | -0.411018 | -0.008817 |
| 8                | 6                | 0              | -3.481703               | -1.638564 | -0.696148 |
| 9                | 6                | 0              | -4.388609               | -1.886009 | 0.250774  |
| 10               | 1                | 0              | -4.166950               | -1.781599 | 1.309206  |
| 11               | 1                | 0              | -5.399001               | -2.210343 | 0.013496  |
| 12               | 1                | 0              | -3.798777               | -1.787220 | -1.727604 |

-----  
 Low frequencies (cm<sup>-1</sup>): 18.3254                    45.7245                    59.8876  
                                   69.6600                    77.4382                    90.9271

Al<sub>6</sub> .... C<sub>2</sub>H<sub>3</sub>I (B3PW91/TZVP, LANL2DZ level of theory)

#### Optimized geometry of reactant

| Center<br>Number | Atomic<br>Number | Atomic<br>Type | Coordinates (Angstroms) |           |           |
|------------------|------------------|----------------|-------------------------|-----------|-----------|
|                  |                  |                | X                       | Y         | Z         |
| 1                | 13               | 0              | -2.657898               | 1.945515  | 0.116844  |
| 2                | 13               | 0              | -0.904293               | 0.649900  | 1.516246  |
| 3                | 13               | 0              | -0.898957               | 0.839946  | -1.430579 |
| 4                | 13               | 0              | -3.171735               | -0.338517 | -1.495546 |
| 5                | 13               | 0              | -1.528975               | -1.752693 | -0.116129 |
| 6                | 13               | 0              | -3.184932               | -0.516144 | 1.413617  |
| 7                | 53               | 0              | 1.987129                | -0.607591 | -0.001384 |
| 8                | 6                | 0              | 2.955565                | 1.286407  | 0.013566  |
| 9                | 6                | 0              | 4.264269                | 1.432442  | -0.010965 |
| 10               | 1                | 0              | 4.957825                | 0.600896  | -0.039796 |
| 11               | 1                | 0              | 4.683650                | 2.434145  | -0.002323 |
| 12               | 1                | 0              | 2.229948                | 2.090102  | 0.041961  |

Low frequencies (cm<sup>-1</sup>): 12.4934                    34.0605                    36.1143  
                                          50.3110                    52.8575                    63.3918

Coordinate of TS

| Center<br>Number | Atomic<br>Number | Atomic<br>Type | Coordinates (Angstroms) |           |           |
|------------------|------------------|----------------|-------------------------|-----------|-----------|
|                  |                  |                | X                       | Y         | Z         |
| 1                | 13               | 0              | 2.696463                | 1.022871  | 1.401079  |
| 2                | 13               | 0              | 1.036416                | 1.816386  | -0.429001 |
| 3                | 13               | 0              | 0.508644                | -0.257906 | 1.558034  |
| 4                | 13               | 0              | 2.476433                | -1.600851 | 0.413237  |
| 5                | 13               | 0              | 0.602917                | -0.886675 | -1.331603 |
| 6                | 13               | 0              | 2.878243                | 0.254666  | -1.520857 |
| 7                | 53               | 0              | -1.855679               | -0.790040 | 0.034771  |
| 8                | 6                | 0              | -2.056448               | 1.941472  | -0.605155 |
| 9                | 6                | 0              | -2.529118               | 2.893367  | 0.150642  |
| 10               | 1                | 0              | -3.495394               | 2.782959  | 0.639630  |
| 11               | 1                | 0              | -2.002864               | 3.828059  | 0.347612  |
| 12               | 1                | 0              | -1.225884               | 1.721684  | -1.284574 |

Low frequencies (cm<sup>-1</sup>): -134.1297                    22.6819                    36.5193  
                                          52.6555                    68.6254                    81.9091

Optimized geometry after C-I dissociation

| Center<br>Number | Atomic<br>Number | Atomic<br>Type | Coordinates (Angstroms) |           |           |
|------------------|------------------|----------------|-------------------------|-----------|-----------|
|                  |                  |                | X                       | Y         | Z         |
| 1                | 13               | 0              | 0.121766                | -0.048582 | -1.392732 |
| 2                | 13               | 0              | -1.901643               | 0.757060  | -0.000297 |
| 3                | 13               | 0              | 0.121673                | -0.048112 | 1.392554  |
| 4                | 13               | 0              | -0.400593               | -2.494191 | 0.000340  |
| 5                | 13               | 0              | -1.918893               | -1.514561 | 1.815534  |
| 6                | 13               | 0              | -1.918836               | -1.515088 | -1.815229 |
| 7                | 53               | 0              | 2.508573                | 0.503001  | -0.000011 |
| 8                | 6                | 0              | -3.632459               | 1.688708  | -0.000305 |
| 9                | 6                | 0              | -3.731759               | 3.019606  | 0.000070  |
| 10               | 1                | 0              | -2.861653               | 3.672154  | 0.000461  |
| 11               | 1                | 0              | -4.693775               | 3.529806  | 0.000019  |
| 12               | 1                | 0              | -4.558812               | 1.114269  | -0.000691 |

Low frequencies (cm<sup>-1</sup>): 23.4554                    46.2049                    57.9063  
                                          64.3769                    72.6553                    91.0538

AL<sub>6</sub> .... C<sub>2</sub>H<sub>3</sub>I (BHandHLYP/TZVP, LANL2DZ level of theory)

Optimized geometry of reactant

| Center | Atomic | Atomic | Coordinates (Angstroms) |  |  |
|--------|--------|--------|-------------------------|--|--|
|--------|--------|--------|-------------------------|--|--|

| Number | Number | Type | X         | Y         | Z         |
|--------|--------|------|-----------|-----------|-----------|
| 1      | 13     | 0    | -2.830888 | 1.960364  | 0.147344  |
| 2      | 13     | 0    | -1.102989 | 0.627068  | 1.544871  |
| 3      | 13     | 0    | -1.085940 | 0.870284  | -1.428036 |
| 4      | 13     | 0    | -3.346159 | -0.357236 | -1.521946 |
| 5      | 13     | 0    | -1.682464 | -1.767168 | -0.149156 |
| 6      | 13     | 0    | -3.368122 | -0.591077 | 1.406969  |
| 7      | 53     | 0    | 2.232982  | -0.616032 | -0.000508 |
| 8      | 6      | 0    | 3.032629  | 1.328708  | 0.030237  |
| 9      | 6      | 0    | 4.314770  | 1.586393  | -0.025716 |
| 10     | 1      | 0    | 5.066888  | 0.821838  | -0.092187 |
| 11     | 1      | 0    | 4.648598  | 2.610238  | -0.005141 |
| 12     | 1      | 0    | 2.267379  | 2.077941  | 0.096522  |

-----  
 Low frequencies (cm<sup>-1</sup>): 8.8953                    22.9455                    29.5930  
                                  34.5288                    41.2436                    46.0014

#### Coordinate of TS

| Center Number | Atomic Number | Atomic Type | Coordinates (Angstroms) |           |           |
|---------------|---------------|-------------|-------------------------|-----------|-----------|
|               |               |             | X                       | Y         | Z         |
| 1             | 13            | 0           | 2.710876                | -1.710767 | 0.588399  |
| 2             | 13            | 0           | 2.097046                | 0.438521  | 1.955418  |
| 3             | 13            | 0           | 0.251340                | -1.009445 | 0.574858  |
| 4             | 13            | 0           | 1.773805                | -0.750237 | -1.732154 |
| 5             | 13            | 0           | 1.162634                | 1.734407  | -0.098018 |
| 6             | 13            | 0           | 3.441139                | 1.058429  | -1.015542 |
| 7             | 53            | 0           | -2.214781               | -0.672528 | -0.125086 |
| 8             | 6             | 0           | -1.834670               | 2.017649  | 0.541672  |
| 9             | 6             | 0           | -2.353101               | 3.018823  | -0.086594 |
| 10            | 1             | 0           | -3.361575               | 2.961023  | -0.466325 |
| 11            | 1             | 0           | -1.821627               | 3.941614  | -0.271296 |
| 12            | 1             | 0           | -0.985710               | 1.630710  | 1.088224  |

-----  
 Low frequencies (cm<sup>-1</sup>): -218.1910                    23.3759                    31.5344  
                                  60.8332                    64.2373                    72.0173

#### Optimized geometry after C-I dissociation

| Center Number | Atomic Number | Atomic Type | Coordinates (Angstroms) |           |           |
|---------------|---------------|-------------|-------------------------|-----------|-----------|
|               |               |             | X                       | Y         | Z         |
| 1             | 13            | 0           | -1.687269               | -0.656357 | -1.504060 |
| 2             | 13            | 0           | -1.869561               | 1.226580  | 0.216241  |
| 3             | 13            | 0           | 0.398200                | -0.231489 | -0.096451 |
| 4             | 13            | 0           | -1.238468               | -2.044073 | 0.962114  |
| 5             | 13            | 0           | -0.963735               | -0.024947 | 2.473885  |
| 6             | 13            | 0           | -2.978623               | -2.856063 | -0.831074 |

|    |    |   |           |          |           |
|----|----|---|-----------|----------|-----------|
| 7  | 53 | 0 | 2.886947  | 0.166267 | -0.202051 |
| 8  | 6  | 0 | -2.672216 | 3.007292 | 0.235291  |
| 9  | 6  | 0 | -3.175641 | 3.586009 | -0.847976 |
| 10 | 1  | 0 | -3.175090 | 3.105168 | -1.813515 |
| 11 | 1  | 0 | -3.612793 | 4.573285 | -0.826143 |
| 12 | 1  | 0 | -2.720246 | 3.572130 | 1.155976  |

-----  
 Low frequencies (cm<sup>-1</sup>): 26.7786            34.3017            47.2387  
                                  60.1413            70.3541            88.6181

Al<sub>6</sub> .... C<sub>6</sub>H<sub>5</sub>I (M062X/TZVP, LANL2DZ level of theory)

Optimized geometry of reactant

| Center<br>Number | Atomic<br>Number | Atomic<br>Type | Coordinates (Angstroms) |           |           |
|------------------|------------------|----------------|-------------------------|-----------|-----------|
|                  |                  |                | X                       | Y         | Z         |
| 1                | 13               | 0              | 3.886149                | 0.160513  | -1.430343 |
| 2                | 13               | 0              | 2.601500                | -1.540808 | 0.008882  |
| 3                | 13               | 0              | 1.379445                | 0.681411  | -1.477776 |
| 4                | 13               | 0              | 2.739169                | 2.316061  | -0.005298 |
| 5                | 13               | 0              | 1.369203                | 0.691622  | 1.469679  |
| 6                | 13               | 0              | 3.876182                | 0.171679  | 1.443943  |
| 7                | 6                | 0              | -2.611755               | 0.052792  | -0.000271 |
| 8                | 6                | 0              | -3.919926               | -0.404094 | 0.009362  |
| 9                | 6                | 0              | -4.951458               | 0.526388  | 0.010533  |
| 10               | 6                | 0              | -4.671031               | 1.886726  | 0.001990  |
| 11               | 6                | 0              | -3.353266               | 2.320627  | -0.007662 |
| 12               | 6                | 0              | -2.309453               | 1.402095  | -0.008973 |
| 13               | 1                | 0              | -4.137464               | -1.463840 | 0.016115  |
| 14               | 1                | 0              | -5.977289               | 0.180439  | 0.018124  |
| 15               | 1                | 0              | -5.479511               | 2.606153  | 0.002950  |
| 16               | 1                | 0              | -3.126036               | 3.379169  | -0.014293 |
| 17               | 1                | 0              | -1.280777               | 1.743694  | -0.016151 |
| 18               | 53               | 0              | -1.040925               | -1.384887 | -0.002920 |

-----  
 Low frequencies (cm<sup>-1</sup>): 10.5960            10.7142            28.1399  
                                  36.0051            51.4584            60.1787

Coordinate of TS

| Center<br>Number | Atomic<br>Number | Atomic<br>Type | Coordinates (Angstroms) |           |           |
|------------------|------------------|----------------|-------------------------|-----------|-----------|
|                  |                  |                | X                       | Y         | Z         |
| 1                | 13               | 0              | 0.204130                | -1.157022 | 0.000132  |
| 2                | 13               | 0              | 2.243074                | -1.806401 | 1.497328  |
| 3                | 13               | 0              | 2.000977                | 0.717531  | 1.394441  |
| 4                | 13               | 0              | 2.000982                | 0.717655  | -1.394292 |
| 5                | 13               | 0              | 4.161121                | -0.484079 | -0.000100 |
| 6                | 13               | 0              | 2.242906                | -1.806280 | -1.497326 |

|    |    |   |           |           |           |
|----|----|---|-----------|-----------|-----------|
| 7  | 6  | 0 | -2.122394 | -0.214732 | -0.000019 |
| 8  | 6  | 0 | -2.729145 | -0.511626 | -1.213569 |
| 9  | 6  | 0 | -3.937631 | -1.196785 | -1.207180 |
| 10 | 6  | 0 | -4.537227 | -1.540536 | 0.000006  |
| 11 | 6  | 0 | -3.937803 | -1.196431 | 1.207176  |
| 12 | 6  | 0 | -2.729316 | -0.511274 | 1.213534  |
| 13 | 1  | 0 | -2.249628 | -0.244488 | -2.149300 |
| 14 | 1  | 0 | -4.411256 | -1.462001 | -2.144337 |
| 15 | 1  | 0 | -5.480905 | -2.070867 | 0.000017  |
| 16 | 1  | 0 | -4.411566 | -1.461359 | 2.144345  |
| 17 | 1  | 0 | -2.249937 | -0.243851 | 2.149254  |
| 18 | 53 | 0 | -0.534473 | 1.625521  | -0.000038 |

-----  
 Low frequencies (cm<sup>-1</sup>): -335.7710                          26.6987                          49.1629  
                                  49.8966                          72.8247                          77.5660

#### Optimized geometry after C-I dissociation

| -----  |        |        |                         |           |           |  |
|--------|--------|--------|-------------------------|-----------|-----------|--|
| Center | Atomic | Atomic | Coordinates (Angstroms) |           |           |  |
| Number | Number | Type   | X                       | Y         | Z         |  |
| -----  |        |        |                         |           |           |  |
| 1      | 13     | 0      | -1.655556               | 2.022306  | 0.463363  |  |
| 2      | 13     | 0      | -2.220086               | 0.146927  | 2.228424  |  |
| 3      | 13     | 0      | -0.403604               | -0.341140 | 0.423145  |  |
| 4      | 13     | 0      | -1.915467               | -1.228982 | -1.720726 |  |
| 5      | 13     | 0      | -3.241946               | -1.103604 | 0.403973  |  |
| 6      | 13     | 0      | -3.030444               | 1.096033  | -1.466975 |  |
| 7      | 6      | 0      | 0.394954                | 1.692439  | 0.080735  |  |
| 8      | 6      | 0      | 0.916349                | 1.861475  | -1.220281 |  |
| 9      | 6      | 0      | 2.227270                | 2.250865  | -1.433107 |  |
| 10     | 6      | 0      | 3.062471                | 2.497427  | -0.348008 |  |
| 11     | 6      | 0      | 2.580439                | 2.365071  | 0.947227  |  |
| 12     | 6      | 0      | 1.267674                | 1.968558  | 1.153831  |  |
| 13     | 1      | 0      | 0.280299                | 1.662305  | -2.075618 |  |
| 14     | 1      | 0      | 2.605151                | 2.355731  | -2.442229 |  |
| 15     | 1      | 0      | 4.091399                | 2.791174  | -0.515002 |  |
| 16     | 1      | 0      | 3.229959                | 2.557287  | 1.791757  |  |
| 17     | 1      | 0      | 0.911618                | 1.848128  | 2.172627  |  |
| 18     | 53     | 0      | 1.665264                | -1.787163 | 0.031706  |  |

-----  
 Low frequencies (cm<sup>-1</sup>): 29.5386                          36.0431                          44.7590  
                                  68.9027                          78.1892                          94.2723

Al<sub>6</sub> .... C<sub>6</sub>H<sub>5</sub>I (B3PW91/TZVP, LANL2DZ level of theory)

#### Optimized geometry of reactant

| -----  |        |        |                         |   |   |  |
|--------|--------|--------|-------------------------|---|---|--|
| Center | Atomic | Atomic | Coordinates (Angstroms) |   |   |  |
| Number | Number | Type   | X                       | Y | Z |  |

|    |    |   |           |           |           |
|----|----|---|-----------|-----------|-----------|
| 1  | 13 | 0 | 3.849283  | 0.145588  | -1.458867 |
| 2  | 13 | 0 | 2.587185  | -1.551903 | 0.000005  |
| 3  | 13 | 0 | 1.354995  | 0.722308  | -1.474807 |
| 4  | 13 | 0 | 2.784480  | 2.309208  | 0.000328  |
| 5  | 13 | 0 | 1.354159  | 0.721936  | 1.474207  |
| 6  | 13 | 0 | 3.848685  | 0.145547  | 1.459494  |
| 7  | 6  | 0 | -2.628559 | 0.041293  | -0.000024 |
| 8  | 6  | 0 | -3.913759 | -0.475744 | 0.000232  |
| 9  | 6  | 0 | -4.985688 | 0.409910  | 0.000248  |
| 10 | 6  | 0 | -4.764515 | 1.781503  | 0.000059  |
| 11 | 6  | 0 | -3.466291 | 2.273532  | -0.000161 |
| 12 | 6  | 0 | -2.382826 | 1.400737  | -0.000191 |
| 13 | 1  | 0 | -4.087339 | -1.544721 | 0.000397  |
| 14 | 1  | 0 | -5.996995 | 0.018910  | 0.000434  |
| 15 | 1  | 0 | -5.604666 | 2.466266  | 0.000082  |
| 16 | 1  | 0 | -3.285545 | 3.342651  | -0.000296 |
| 17 | 1  | 0 | -1.366496 | 1.783859  | -0.000365 |
| 18 | 53 | 0 | -0.979875 | -1.340741 | -0.000111 |

Low frequencies (cm<sup>-1</sup>): 14.4804                      21.4178                      29.5447  
37.7012                      54.2675                      62.1928

Coordinate of TS

| Center<br>Number | Atomic<br>Number | Atomic<br>Type | Coordinates (Angstroms) |           |           |
|------------------|------------------|----------------|-------------------------|-----------|-----------|
|                  |                  |                | X                       | Y         | Z         |
| 1                | 13               | 0              | -0.170774               | -1.139416 | 0.006581  |
| 2                | 13               | 0              | -2.207917               | -1.791439 | -1.491794 |
| 3                | 13               | 0              | -2.162960               | 0.752875  | -1.414316 |
| 4                | 13               | 0              | -2.151278               | 0.781665  | 1.383495  |
| 5                | 13               | 0              | -4.168629               | -0.669459 | 0.007773  |
| 6                | 13               | 0              | -2.207147               | -1.762491 | 1.518286  |
| 7                | 6                | 0              | 2.156000                | -0.224875 | 0.001501  |
| 8                | 6                | 0              | 2.771378                | -0.512415 | 1.216066  |
| 9                | 6                | 0              | 3.975439                | -1.205725 | 1.207405  |
| 10               | 6                | 0              | 4.569112                | -1.560057 | -0.000593 |
| 11               | 6                | 0              | 3.967894                | -1.215757 | -1.207705 |
| 12               | 6                | 0              | 2.763700                | -0.522583 | -1.214486 |
| 13               | 1                | 0              | 2.303568                | -0.232461 | 2.154081  |
| 14               | 1                | 0              | 4.452013                | -1.466890 | 2.146140  |
| 15               | 1                | 0              | 5.512807                | -2.093522 | -0.001323 |
| 16               | 1                | 0              | 4.438567                | -1.484639 | -2.147236 |
| 17               | 1                | 0              | 2.289729                | -0.250802 | -2.151849 |
| 18               | 53               | 0              | 0.559912                | 1.636684  | -0.002703 |

Low frequencies (cm<sup>-1</sup>): -285.0504                      19.9710                      31.6774  
43.6317                      57.7318                      71.8831

Optimized geometry after C-I dissociation

| Center<br>Number | Atomic<br>Number | Atomic<br>Type | Coordinates (Angstroms) |           |           |
|------------------|------------------|----------------|-------------------------|-----------|-----------|
|                  |                  |                | X                       | Y         | Z         |
| 1                | 13               | 0              | -1.565886               | 2.055959  | 0.471324  |
| 2                | 13               | 0              | -2.159748               | 0.187137  | 2.223867  |
| 3                | 13               | 0              | -0.360411               | -0.350590 | 0.400412  |
| 4                | 13               | 0              | -2.029585               | -1.137514 | -1.708137 |
| 5                | 13               | 0              | -3.297674               | -1.049571 | 0.444872  |
| 6                | 13               | 0              | -3.051262               | 1.218045  | -1.429377 |
| 7                | 6                | 0              | 0.484840                | 1.681542  | 0.080674  |
| 8                | 6                | 0              | 1.003532                | 1.895380  | -1.216997 |
| 9                | 6                | 0              | 2.289900                | 2.367592  | -1.417063 |
| 10               | 6                | 0              | 3.103816                | 2.653050  | -0.324958 |
| 11               | 6                | 0              | 2.627041                | 2.467668  | 0.966886  |
| 12               | 6                | 0              | 1.341244                | 1.987784  | 1.163287  |
| 13               | 1                | 0              | 0.383065                | 1.675016  | -2.079068 |
| 14               | 1                | 0              | 2.664142                | 2.510834  | -2.424692 |
| 15               | 1                | 0              | 4.112676                | 3.018257  | -0.482743 |
| 16               | 1                | 0              | 3.261036                | 2.688021  | 1.818304  |
| 17               | 1                | 0              | 0.987626                | 1.836201  | 2.179343  |
| 18               | 53               | 0              | 1.613747                | -1.925499 | 0.004517  |

-----  
Low frequencies (cm<sup>-1</sup>): 31.7465                      35.8232                      51.4638  
                                         69.6590                      73.0823                      94.0954  
-----

Al<sub>6</sub> .... C<sub>6</sub>H<sub>5</sub>I (BHandHLYP/TZVP, LANL2DZ level of theory)

Optimized geometry of reactant

| Center<br>Number | Atomic<br>Number | Atomic<br>Type | Coordinates (Angstroms) |           |           |
|------------------|------------------|----------------|-------------------------|-----------|-----------|
|                  |                  |                | X                       | Y         | Z         |
| 1                | 13               | 0              | 4.093138                | 0.028114  | -1.469645 |
| 2                | 13               | 0              | 2.732883                | -1.592892 | 0.000490  |
| 3                | 13               | 0              | 1.625687                | 0.760551  | -1.491631 |
| 4                | 13               | 0              | 3.081647                | 2.302194  | 0.000040  |
| 5                | 13               | 0              | 1.624957                | 0.761206  | 1.491490  |
| 6                | 13               | 0              | 4.092315                | 0.028353  | 1.470874  |
| 7                | 6                | 0              | -2.791419               | 0.081975  | -0.000101 |
| 8                | 6                | 0              | -4.107725               | -0.331163 | 0.001857  |
| 9                | 6                | 0              | -5.110698               | 0.620149  | 0.002093  |
| 10               | 6                | 0              | -4.797779               | 1.965586  | 0.000402  |
| 11               | 6                | 0              | -3.475088               | 2.361527  | -0.001534 |
| 12               | 6                | 0              | -2.461879               | 1.420124  | -0.001815 |
| 13               | 1                | 0              | -4.355323               | -1.376036 | 0.003202  |
| 14               | 1                | 0              | -6.138075               | 0.302720  | 0.003615  |
| 15               | 1                | 0              | -5.581366               | 2.701480  | 0.000596  |
| 16               | 1                | 0              | -3.221910               | 3.406587  | -0.002857 |
| 17               | 1                | 0              | -1.434804               | 1.735567  | -0.003318 |
| 18               | 53               | 0              | -1.265267               | -1.381460 | -0.000522 |

-----  
 Low frequencies (cm<sup>-1</sup>): 11.7308                    23.9261                    24.8069  
                                  32.8527                    39.5012                    45.5366

Coordinate of TS

-----

| Center<br>Number | Atomic<br>Number | Atomic<br>Type | Coordinates (Angstroms) |           |           |
|------------------|------------------|----------------|-------------------------|-----------|-----------|
|                  |                  |                | X                       | Y         | Z         |
| 1                | 13               | 0              | 0.207787                | -1.182518 | 0.000084  |
| 2                | 13               | 0              | 2.227920                | -1.654490 | 1.574399  |
| 3                | 13               | 0              | 2.174796                | 0.908800  | 1.375404  |
| 4                | 13               | 0              | 2.174820                | 0.908639  | -1.375406 |
| 5                | 13               | 0              | 4.283717                | -0.879546 | 0.000128  |
| 6                | 13               | 0              | 2.227974                | -1.654682 | -1.574102 |
| 7                | 6                | 0              | -2.086765               | -0.327817 | -0.000015 |
| 8                | 6                | 0              | -2.713141               | -0.604615 | -1.206557 |
| 9                | 6                | 0              | -3.927620               | -1.260230 | -1.199953 |
| 10               | 6                | 0              | -4.531571               | -1.594292 | 0.000040  |
| 11               | 6                | 0              | -3.927656               | -1.260054 | 1.200003  |
| 12               | 6                | 0              | -2.713177               | -0.604439 | 1.206548  |
| 13               | 1                | 0              | -2.244064               | -0.341810 | -2.137771 |
| 14               | 1                | 0              | -4.403361               | -1.509555 | -2.131756 |
| 15               | 1                | 0              | -5.480506               | -2.099508 | 0.000063  |
| 16               | 1                | 0              | -4.403426               | -1.509243 | 2.131828  |
| 17               | 1                | 0              | -2.244129               | -0.341499 | 2.137737  |
| 18               | 53               | 0              | -0.654455               | 1.620937  | -0.000134 |

-----

Low frequencies (cm<sup>-1</sup>): -383.7791                    6.1978                    35.0091  
                                  45.4650                    67.4749                    77.9367

Optimized geometry after C-I dissociation

-----

| Center<br>Number | Atomic<br>Number | Atomic<br>Type | Coordinates (Angstroms) |           |           |
|------------------|------------------|----------------|-------------------------|-----------|-----------|
|                  |                  |                | X                       | Y         | Z         |
| 1                | 13               | 0              | -1.587374               | 2.016795  | 0.529088  |
| 2                | 13               | 0              | -2.159677               | 0.087644  | 2.202737  |
| 3                | 13               | 0              | -0.336104               | -0.380821 | 0.408294  |
| 4                | 13               | 0              | -2.105695               | -1.140094 | -1.738107 |
| 5                | 13               | 0              | -3.333997               | -1.126717 | 0.433772  |
| 6                | 13               | 0              | -3.107022               | 1.229054  | -1.368779 |
| 7                | 6                | 0              | 0.446053                | 1.703948  | 0.106140  |
| 8                | 6                | 0              | 0.938458                | 1.931185  | -1.191250 |
| 9                | 6                | 0              | 2.219829                | 2.383100  | -1.414778 |
| 10               | 6                | 0              | 3.057864                | 2.637415  | -0.343279 |
| 11               | 6                | 0              | 2.609762                | 2.442099  | 0.948985  |
| 12               | 6                | 0              | 1.327819                | 1.982047  | 1.164828  |
| 13               | 1                | 0              | 0.304198                | 1.738802  | -2.038282 |
| 14               | 1                | 0              | 2.570044                | 2.534294  | -2.420108 |

-----



|    |    |   |          |           |           |
|----|----|---|----------|-----------|-----------|
| 15 | 1  | 0 | 4.060590 | 2.985439  | -0.517176 |
| 16 | 1  | 0 | 3.260552 | 2.637828  | 1.782212  |
| 17 | 1  | 0 | 1.001684 | 1.822744  | 2.179068  |
| 18 | 53 | 0 | 1.686651 | -1.870077 | -0.012842 |

-----

Low frequencies (cm<sup>-1</sup>): 32.0063                    36.8154                    56.9590  
                                         73.0275                    75.4077                    96.6384

Al<sub>7</sub> .... C<sub>2</sub>H<sub>5</sub>I (M062X/TZVP, LANL2DZ level of theory)

Optimized geometry of reactant

| Center | Atomic | Atomic | Coordinates (Angstroms) |           |           |
|--------|--------|--------|-------------------------|-----------|-----------|
| Number | Number | Type   | X                       | Y         | Z         |
| 1      | 13     | 0      | 2.452148                | -1.739435 | -0.564668 |
| 2      | 13     | 0      | 4.139557                | -0.665295 | 1.220279  |
| 3      | 13     | 0      | 3.795269                | 0.219406  | -1.355640 |
| 4      | 13     | 0      | 1.538959                | -0.284909 | 1.561365  |
| 5      | 13     | 0      | 2.727865                | 1.728512  | 0.680174  |
| 6      | 13     | 0      | 1.379834                | 1.100075  | -1.420050 |
| 7      | 13     | 0      | 0.040783                | -0.800526 | -0.488773 |
| 8      | 6      | 0      | -2.804505               | 1.555884  | -0.469639 |
| 9      | 6      | 0      | -2.246795               | 2.329796  | 0.698770  |
| 10     | 1      | 0      | -3.779061               | 1.902598  | -0.796831 |
| 11     | 1      | 0      | -2.920520               | 2.308728  | 1.554419  |
| 12     | 1      | 0      | -1.274367               | 1.941484  | 1.003705  |
| 13     | 1      | 0      | -2.109303               | 3.370397  | 0.393091  |
| 14     | 1      | 0      | -2.116742               | 1.509576  | -1.310333 |
| 15     | 53     | 0      | -3.140747               | -0.539597 | 0.048231  |

-----

Low frequencies (cm<sup>-1</sup>): 12.2850                    22.8722                    28.1772  
                                         34.4798                    72.4008                    80.5517

Coordinate of TS

| Center | Atomic | Atomic | Coordinates (Angstroms) |           |           |
|--------|--------|--------|-------------------------|-----------|-----------|
| Number | Number | Type   | X                       | Y         | Z         |
| 1      | 13     | 0      | -2.011621               | -0.967095 | 1.398214  |
| 2      | 13     | 0      | -4.219836               | -1.087447 | -0.000711 |
| 3      | 13     | 0      | -3.385450               | 1.173528  | 1.349711  |
| 4      | 13     | 0      | -2.011952               | -0.964209 | -1.400112 |
| 5      | 13     | 0      | -3.386822               | 1.175736  | -1.347088 |
| 6      | 13     | 0      | -1.240637               | 1.606050  | 0.000554  |
| 7      | 13     | 0      | 0.115213                | -0.523344 | -0.000691 |
| 8      | 6      | 0      | 2.970561                | 1.708441  | -0.000088 |
| 9      | 6      | 0      | 4.404860                | 2.123186  | 0.000165  |
| 10     | 1      | 0      | 2.400227                | 1.890287  | 0.904597  |

|    |    |   |          |           |           |
|----|----|---|----------|-----------|-----------|
| 11 | 1  | 0 | 4.927047 | 1.765540  | 0.887531  |
| 12 | 1  | 0 | 4.927589 | 1.764568  | -0.886497 |
| 13 | 1  | 0 | 4.466436 | 3.217413  | -0.000441 |
| 14 | 1  | 0 | 2.400639 | 1.890143  | -0.905060 |
| 15 | 53 | 0 | 2.763395 | -0.733765 | 0.000019  |

-----  
 Low frequencies (cm<sup>-1</sup>): -630.0453                      3.0485                      23.8996  
                                          27.1708                      42.2941                      50.3940

Optimized geometry after C-I dissociation

| -----  |        |        |                         |           |           |  |
|--------|--------|--------|-------------------------|-----------|-----------|--|
| Center | Atomic | Atomic | Coordinates (Angstroms) |           |           |  |
| Number | Number | Type   | X                       | Y         | Z         |  |
| -----  |        |        |                         |           |           |  |
| 1      | 13     | 0      | 1.089980                | -2.437947 | 0.032879  |  |
| 2      | 13     | 0      | 3.388449                | -1.869631 | -0.974332 |  |
| 3      | 13     | 0      | 1.431715                | -0.273447 | -1.640495 |  |
| 4      | 13     | 0      | 0.971116                | -0.789714 | 1.995050  |  |
| 5      | 13     | 0      | 3.217936                | -0.249812 | 0.943720  |  |
| 6      | 13     | 0      | 1.208767                | 1.377696  | 0.346451  |  |
| 7      | 13     | 0      | -0.685746               | -0.543977 | -0.232913 |  |
| 8      | 6      | 0      | 1.161527                | 3.354723  | 0.339889  |  |
| 9      | 6      | 0      | 2.188731                | 3.975619  | -0.614937 |  |
| 10     | 1      | 0      | 1.329697                | 3.699038  | 1.363795  |  |
| 11     | 1      | 0      | 2.146401                | 5.066949  | -0.593336 |  |
| 12     | 1      | 0      | 3.207509                | 3.682288  | -0.353014 |  |
| 13     | 1      | 0      | 2.015334                | 3.660723  | -1.645862 |  |
| 14     | 1      | 0      | 0.147954                | 3.660699  | 0.066222  |  |
| 15     | 53     | 0      | -3.151647               | -0.028735 | -0.062305 |  |

-----  
 Low frequencies (cm<sup>-1</sup>): 24.4288                      29.0798                      47.2854  
                                          59.2843                      68.4504                      85.0074

Al<sub>7</sub> .... C<sub>2</sub>H<sub>5</sub>I (B3PW91/TZVP, LANL2DZ level of theory)

Optimized geometry of reactant

| -----  |        |        |                         |           |           |  |
|--------|--------|--------|-------------------------|-----------|-----------|--|
| Center | Atomic | Atomic | Coordinates (Angstroms) |           |           |  |
| Number | Number | Type   | X                       | Y         | Z         |  |
| -----  |        |        |                         |           |           |  |
| 1      | 13     | 0      | 2.215463                | -1.764424 | -0.507429 |  |
| 2      | 13     | 0      | 4.297250                | -0.844741 | 0.934289  |  |
| 3      | 13     | 0      | 3.558946                | 0.077494  | -1.579274 |  |
| 4      | 13     | 0      | 1.853257                | -0.080453 | 1.753213  |  |
| 5      | 13     | 0      | 3.200017                | 1.684212  | 0.564817  |  |
| 6      | 13     | 0      | 1.369310                | 1.439500  | -1.265098 |  |
| 7      | 13     | 0      | 0.084455                | -0.392487 | -0.090665 |  |
| 8      | 6      | 0      | -3.191829               | 1.495038  | -0.435436 |  |
| 9      | 6      | 0      | -3.139033               | 2.312913  | 0.825316  |  |
| 10     | 1      | 0      | -4.128739               | 1.583684  | -0.978343 |  |

|    |    |   |           |           |           |
|----|----|---|-----------|-----------|-----------|
| 11 | 1  | 0 | -3.958251 | 2.074561  | 1.504743  |
| 12 | 1  | 0 | -2.193970 | 2.181739  | 1.354298  |
| 13 | 1  | 0 | -3.223225 | 3.370495  | 0.552010  |
| 14 | 1  | 0 | -2.348900 | 1.675779  | -1.099841 |
| 15 | 53 | 0 | -3.050657 | -0.665703 | -0.022646 |

-----  
 Low frequencies (cm<sup>-1</sup>): 18.6330                      20.4529                      24.1010  
                                  31.3396                      41.4892                      52.9386

#### Coordinate of TS

| -----  |        |        |                         |           |           |  |
|--------|--------|--------|-------------------------|-----------|-----------|--|
| Center | Atomic | Atomic | Coordinates (Angstroms) |           |           |  |
| Number | Number | Type   | X                       | Y         | Z         |  |
| -----  |        |        |                         |           |           |  |
| 1      | 13     | 0      | 2.005183                | -0.945316 | -1.423686 |  |
| 2      | 13     | 0      | 4.201543                | -1.198309 | -0.000057 |  |
| 3      | 13     | 0      | 3.508521                | 1.121276  | -1.350820 |  |
| 4      | 13     | 0      | 2.004710                | -0.946045 | 1.422992  |  |
| 5      | 13     | 0      | 3.508090                | 1.120551  | 1.351696  |  |
| 6      | 13     | 0      | 1.399898                | 1.759785  | 0.000239  |  |
| 7      | 13     | 0      | -0.065937               | -0.292783 | -0.000484 |  |
| 8      | 6      | 0      | -3.332904               | 1.627608  | -0.000380 |  |
| 9      | 6      | 0      | -4.814959               | 1.788075  | 0.000236  |  |
| 10     | 1      | 0      | -2.811450               | 1.928011  | -0.903851 |  |
| 11     | 1      | 0      | -5.276768               | 1.352158  | -0.887216 |  |
| 12     | 1      | 0      | -5.275928               | 1.353011  | 0.888542  |  |
| 13     | 1      | 0      | -5.054740               | 2.859657  | -0.000176 |  |
| 14     | 1      | 0      | -2.810640               | 1.928509  | 0.902458  |  |
| 15     | 53     | 0      | -2.739423               | -0.716312 | 0.000050  |  |

-----  
 Low frequencies (cm<sup>-1</sup>): -336.7763                      10.1621                      26.0001  
                                  31.7408                      40.6389                      56.9481

#### Optimized geometry after C-I dissociation

| -----  |        |        |                         |           |           |  |
|--------|--------|--------|-------------------------|-----------|-----------|--|
| Center | Atomic | Atomic | Coordinates (Angstroms) |           |           |  |
| Number | Number | Type   | X                       | Y         | Z         |  |
| -----  |        |        |                         |           |           |  |
| 1      | 13     | 0      | 0.918651                | -2.513735 | 0.215125  |  |
| 2      | 13     | 0      | 3.204660                | -2.123600 | -0.907887 |  |
| 3      | 13     | 0      | 1.326599                | -0.492403 | -1.728323 |  |
| 4      | 13     | 0      | 1.034895                | -0.644958 | 1.999319  |  |
| 5      | 13     | 0      | 3.291102                | -0.305688 | 0.847087  |  |
| 6      | 13     | 0      | 1.345661                | 1.360082  | 0.113440  |  |
| 7      | 13     | 0      | -0.727229               | -0.491867 | -0.157913 |  |
| 8      | 6      | 0      | 1.299058                | 3.351352  | 0.017542  |  |
| 9      | 6      | 0      | 2.629762                | 4.019112  | -0.335299 |  |
| 10     | 1      | 0      | 0.943083                | 3.695292  | 0.995879  |  |
| 11     | 1      | 0      | 2.536088                | 5.109850  | -0.353027 |  |
| 12     | 1      | 0      | 3.412104                | 3.773242  | 0.387623  |  |

|    |    |   |           |          |           |
|----|----|---|-----------|----------|-----------|
| 13 | 1  | 0 | 2.990793  | 3.710009 | -1.319538 |
| 14 | 1  | 0 | 0.522997  | 3.626089 | -0.704204 |
| 15 | 53 | 0 | -3.190649 | 0.068320 | -0.038703 |

-----  
 Low frequencies (cm<sup>-1</sup>): 21.9069                    31.0044                    47.6784  
                                  63.3540                    73.8844                    79.1496

Al<sub>7</sub> .... C<sub>2</sub>H<sub>5</sub>I (BHandHLYP/TZVP, LANL2DZ level of theory)

Optimized geometry of reactant

| Center<br>Number | Atomic<br>Number | Atomic<br>Type | Coordinates (Angstroms) |           |           |
|------------------|------------------|----------------|-------------------------|-----------|-----------|
|                  |                  |                | X                       | Y         | Z         |
| 1                | 13               | 0              | 2.552822                | -1.818820 | -0.869832 |
| 2                | 13               | 0              | 4.558309                | -0.595863 | 0.454063  |
| 3                | 13               | 0              | 3.267851                | 0.522298  | -1.582401 |
| 4                | 13               | 0              | 2.276786                | -0.730024 | 1.875194  |
| 5                | 13               | 0              | 3.005491                | 1.515005  | 0.912563  |
| 6                | 13               | 0              | 1.162782                | 1.971080  | -0.921700 |
| 7                | 13               | 0              | 0.570861                | -0.439669 | -0.015748 |
| 8                | 6                | 0              | -3.370360               | 1.438817  | -0.359820 |
| 9                | 6                | 0              | -3.452636               | 2.185787  | 0.943142  |
| 10               | 1                | 0              | -4.259345               | 1.541573  | -0.959669 |
| 11               | 1                | 0              | -4.306309               | 1.873091  | 1.531111  |
| 12               | 1                | 0              | -2.558513               | 2.049191  | 1.538014  |
| 13               | 1                | 0              | -3.557090               | 3.247286  | 0.733101  |
| 14               | 1                | 0              | -2.504718               | 1.711452  | -0.941517 |
| 15               | 53               | 0              | -3.169996               | -0.710987 | -0.065637 |

-----  
 Low frequencies (cm<sup>-1</sup>): 9.9543                    13.3669                    17.3507  
                                  22.4708                    27.2476                    54.2600

Coordinate of TS

| Center<br>Number | Atomic<br>Number | Atomic<br>Type | Coordinates (Angstroms) |           |           |
|------------------|------------------|----------------|-------------------------|-----------|-----------|
|                  |                  |                | X                       | Y         | Z         |
| 1                | 13               | 0              | 2.003856                | -0.962306 | -1.446339 |
| 2                | 13               | 0              | 4.195184                | -1.153738 | -0.000586 |
| 3                | 13               | 0              | 3.432099                | 1.159156  | -1.346075 |
| 4                | 13               | 0              | 2.003881                | -0.963901 | 1.445336  |
| 5                | 13               | 0              | 3.431637                | 1.157979  | 1.347340  |
| 6                | 13               | 0              | 1.301373                | 1.730785  | 0.000489  |
| 7                | 13               | 0              | -0.070471               | -0.393360 | -0.000175 |
| 8                | 6                | 0              | -3.181471               | 1.688589  | 0.000007  |
| 9                | 6                | 0              | -4.644985               | 1.943093  | -0.000070 |
| 10               | 1                | 0              | -2.639015               | 1.922561  | -0.898729 |
| 11               | 1                | 0              | -5.126163               | 1.537752  | -0.881530 |
| 12               | 1                | 0              | -5.126248               | 1.537792  | 0.881363  |

|    |    |   |           |           |           |
|----|----|---|-----------|-----------|-----------|
| 13 | 1  | 0 | -4.815691 | 3.019639  | -0.000104 |
| 14 | 1  | 0 | -2.639108 | 1.922535  | 0.898806  |
| 15 | 53 | 0 | -2.727610 | -0.739629 | 0.000013  |

-----  
 Low frequencies (cm<sup>-1</sup>): -1314.1805                      14.2387                      19.6942  
                                          29.2758                      42.4615                      59.6322

Optimized geometry after C-I dissociation

-----

| Center<br>Number | Atomic<br>Number | Atomic<br>Type | Coordinates (Angstroms) |           |           |
|------------------|------------------|----------------|-------------------------|-----------|-----------|
|                  |                  |                | X                       | Y         | Z         |
| 1                | 13               | 0              | 0.966716                | -2.529593 | 0.190903  |
| 2                | 13               | 0              | 3.208179                | -2.075379 | -0.973963 |
| 3                | 13               | 0              | 1.378295                | -0.327057 | -1.718297 |
| 4                | 13               | 0              | 1.117513                | -0.700152 | 2.022377  |
| 5                | 13               | 0              | 3.349074                | -0.261345 | 0.801390  |
| 6                | 13               | 0              | 1.319919                | 1.410623  | 0.221034  |
| 7                | 13               | 0              | -0.682022               | -0.496718 | -0.197376 |
| 8                | 6                | 0              | 1.200970                | 3.383187  | 0.352748  |
| 9                | 6                | 0              | 2.144528                | 4.155632  | -0.569183 |
| 10               | 1                | 0              | 1.382944                | 3.658944  | 1.388863  |
| 11               | 1                | 0              | 2.028217                | 5.228963  | -0.449150 |
| 12               | 1                | 0              | 3.185081                | 3.921296  | -0.367514 |
| 13               | 1                | 0              | 1.960609                | 3.927168  | -1.614028 |
| 14               | 1                | 0              | 0.169296                | 3.660050  | 0.146473  |
| 15               | 53               | 0              | -3.157526               | -0.016873 | -0.043489 |

-----

Low frequencies (cm<sup>-1</sup>): 13.2126                      31.9980                      39.3039  
                                          57.0321                      75.1781                      85.4673

Al<sub>7</sub> .... C<sub>2</sub>H<sub>3</sub>I (M062X/TZVP, LANL2DZ level of theory)

Optimized geometry of reactant

-----

| Center<br>Number | Atomic<br>Number | Atomic<br>Type | Coordinates (Angstroms) |           |           |
|------------------|------------------|----------------|-------------------------|-----------|-----------|
|                  |                  |                | X                       | Y         | Z         |
| 1                | 13               | 0              | -2.474178               | -1.194959 | -1.183518 |
| 2                | 13               | 0              | -4.398278               | 0.477559  | -1.512912 |
| 3                | 13               | 0              | -4.503723               | -1.467765 | 0.369658  |
| 4                | 13               | 0              | -2.347379               | 1.550781  | -0.392645 |
| 5                | 13               | 0              | -4.394329               | 1.131385  | 1.107391  |
| 6                | 13               | 0              | -2.462878               | -0.495595 | 1.594372  |
| 7                | 13               | 0              | -0.379837               | -0.148983 | 0.021526  |
| 8                | 53               | 0              | 3.427983                | 0.070900  | 0.001347  |
| 9                | 6                | 0              | 5.514277                | 0.383840  | -0.008068 |
| 10               | 6                | 0              | 6.395884                | -0.595314 | -0.007544 |
| 11               | 1                | 0              | 5.778262                | 1.431673  | -0.013256 |

|    |   |   |          |           |           |
|----|---|---|----------|-----------|-----------|
| 12 | 1 | 0 | 7.455125 | -0.362629 | -0.012516 |
| 13 | 1 | 0 | 6.110356 | -1.639423 | -0.002302 |

-----  
 Low frequencies (cm<sup>-1</sup>): 6.1679                    13.3761                    22.2879  
                                  33.0228                    36.7963                    62.8742

Coordinate of TS

| Center<br>Number | Atomic<br>Number | Atomic<br>Type | Coordinates (Angstroms) |           |           |
|------------------|------------------|----------------|-------------------------|-----------|-----------|
|                  |                  |                | X                       | Y         | Z         |
| 1                | 13               | 0              | 2.004649                | -1.153454 | -1.177132 |
| 2                | 13               | 0              | 4.005751                | -1.471953 | 0.403029  |
| 3                | 13               | 0              | 3.992748                | 0.440036  | -1.507543 |
| 4                | 13               | 0              | 2.000224                | -0.407629 | 1.606343  |
| 5                | 13               | 0              | 3.992050                | 1.135174  | 1.102784  |
| 6                | 13               | 0              | 1.988556                | 1.630561  | -0.427493 |
| 7                | 13               | 0              | -0.022818               | 0.012081  | 0.000316  |
| 8                | 53               | 0              | -2.817741               | -0.114420 | -0.000253 |
| 9                | 6                | 0              | -5.137100               | -0.315874 | 0.001725  |
| 10               | 6                | 0              | -5.901203               | 0.750249  | -0.000440 |
| 11               | 1                | 0              | -5.441992               | -1.354029 | 0.004519  |
| 12               | 1                | 0              | -6.984751               | 0.652656  | 0.000454  |
| 13               | 1                | 0              | -5.498245               | 1.756772  | -0.003186 |

-----  
 Low frequencies (cm<sup>-1</sup>): -149.0877                    10.4271                    21.4970  
                                  43.3288                    48.4419                    60.8946

Optimized geometry after C-I dissociation

| Center<br>Number | Atomic<br>Number | Atomic<br>Type | Coordinates (Angstroms) |           |           |
|------------------|------------------|----------------|-------------------------|-----------|-----------|
|                  |                  |                | X                       | Y         | Z         |
| 1                | 13               | 0              | 0.941795                | -2.032322 | -0.794798 |
| 2                | 13               | 0              | 3.018846                | -1.688861 | 1.047330  |
| 3                | 13               | 0              | 3.227119                | -0.941407 | -1.389338 |
| 4                | 13               | 0              | 1.043773                | -0.264409 | 1.654941  |
| 5                | 13               | 0              | 3.219950                | 1.097011  | 0.816762  |
| 6                | 13               | 0              | 1.232784                | 0.648120  | -0.940542 |
| 7                | 13               | 0              | -0.928282               | -0.535826 | -0.052806 |
| 8                | 53               | 0              | -3.374964               | 0.037098  | 0.014638  |
| 9                | 6                | 0              | 2.062386                | 2.498482  | -0.704297 |
| 10               | 6                | 0              | 1.428153                | 3.463518  | -0.017451 |
| 11               | 1                | 0              | 0.678149                | 3.233445  | 0.734223  |
| 12               | 1                | 0              | 1.640812                | 4.518122  | -0.173980 |
| 13               | 1                | 0              | 2.783112                | 2.840250  | -1.445730 |

-----  
 Low frequencies (cm<sup>-1</sup>): 33.8269                    48.6653                    61.4320  
                                  84.9865                    90.2886                    128.0257

Al<sub>7</sub> .... C<sub>2</sub>H<sub>3</sub>I (B3PW91/TZVP, LANL2DZ level of theory)

Optimized geometry of reactant

| Center Number | Atomic Number | Atomic Type | Coordinates (Angstroms) |           |           |
|---------------|---------------|-------------|-------------------------|-----------|-----------|
|               |               |             | X                       | Y         | Z         |
| 1             | 13            | 0           | 2.573224                | 0.985785  | -1.430759 |
| 2             | 13            | 0           | 4.551083                | -0.665231 | -1.296737 |
| 3             | 13            | 0           | 4.443613                | 1.577305  | 0.244625  |
| 4             | 13            | 0           | 2.448218                | -1.650624 | -0.170580 |
| 5             | 13            | 0           | 4.351741                | -0.874316 | 1.395078  |
| 6             | 13            | 0           | 2.337608                | 0.740944  | 1.478509  |
| 7             | 13            | 0           | 0.423140                | 0.048582  | -0.208146 |
| 8             | 53            | 0           | -3.462860               | -0.108218 | -0.056384 |
| 9             | 6             | 0           | -5.557420               | -0.287559 | 0.210268  |
| 10            | 6             | 0           | -6.398788               | 0.726975  | 0.151602  |
| 11            | 1             | 0           | -5.858080               | -1.309013 | 0.401279  |
| 12            | 1             | 0           | -7.460201               | 0.550352  | 0.300184  |
| 13            | 1             | 0           | -6.085041               | 1.745906  | -0.040207 |

Low frequencies (cm<sup>-1</sup>): 10.6193      11.8758      15.9207  
19.8453      27.5972      32.5636

Coordinate of TS

| Center Number | Atomic Number | Atomic Type | Coordinates (Angstroms) |           |           |
|---------------|---------------|-------------|-------------------------|-----------|-----------|
|               |               |             | X                       | Y         | Z         |
| 1             | 13            | 0           | 1.980510                | 1.191755  | -1.205011 |
| 2             | 13            | 0           | 4.019593                | -0.357222 | -1.538767 |
| 3             | 13            | 0           | 4.003864                | 1.581390  | 0.346160  |
| 4             | 13            | 0           | 2.069418                | -1.623704 | -0.416262 |
| 5             | 13            | 0           | 4.087030                | -1.033534 | 1.078323  |
| 6             | 13            | 0           | 2.073387                | 0.473291  | 1.648665  |
| 7             | 13            | 0           | 0.028955                | -0.032639 | 0.067730  |
| 8             | 53            | 0           | -2.885634               | -0.137162 | 0.029791  |
| 9             | 6             | 0           | -5.157533               | -0.250658 | -0.114461 |
| 10            | 6             | 0           | -5.919966               | 0.818548  | -0.057111 |
| 11            | 1             | 0           | -5.486636               | -1.275289 | -0.233589 |
| 12            | 1             | 0           | -7.002570               | 0.725125  | -0.129709 |
| 13            | 1             | 0           | -5.523030               | 1.821041  | 0.062870  |

Low frequencies (cm<sup>-1</sup>): -80.4665      10.6353      15.1166  
18.7387      35.1319      36.5414

Optimized geometry after C-I dissociation

| Center Number | Atomic Number | Atomic Type | Coordinates (Angstroms) |   |   |
|---------------|---------------|-------------|-------------------------|---|---|
|               |               |             | X                       | Y | Z |

|    |    |   |           |           |           |
|----|----|---|-----------|-----------|-----------|
| 1  | 13 | 0 | 0.918651  | -2.513735 | 0.215125  |
| 2  | 13 | 0 | 3.204660  | -2.123600 | -0.907887 |
| 3  | 13 | 0 | 1.326599  | -0.492403 | -1.728323 |
| 4  | 13 | 0 | 1.034895  | -0.644958 | 1.999319  |
| 5  | 13 | 0 | 3.291102  | -0.305688 | 0.847087  |
| 6  | 13 | 0 | 1.345661  | 1.360082  | 0.113440  |
| 7  | 13 | 0 | -0.727229 | -0.491867 | -0.157913 |
| 8  | 6  | 0 | 1.299058  | 3.351352  | 0.017542  |
| 9  | 6  | 0 | 2.629762  | 4.019112  | -0.335299 |
| 10 | 1  | 0 | 0.943083  | 3.695292  | 0.995879  |
| 11 | 1  | 0 | 2.536088  | 5.109850  | -0.353027 |
| 12 | 1  | 0 | 3.412104  | 3.773242  | 0.387623  |
| 13 | 1  | 0 | 2.990793  | 3.710009  | -1.319538 |
| 14 | 1  | 0 | 0.522997  | 3.626089  | -0.704204 |
| 15 | 53 | 0 | -3.190649 | 0.068320  | -0.038703 |

-----  
 Low frequencies (cm<sup>-1</sup>): 21.9069                    31.0044                    47.6784  
                                   63.3540                    73.8844                    79.1496  
 -----

Al<sub>7</sub> .... C<sub>2</sub>H<sub>3</sub>I (BHandHLYP/TZVP, LANL2DZ level of theory)

Optimized geometry of reactant

| Center<br>Number | Atomic<br>Number | Atomic<br>Type | Coordinates (Angstroms) |           |           |
|------------------|------------------|----------------|-------------------------|-----------|-----------|
|                  |                  |                | X                       | Y         | Z         |
| 1                | 13               | 0              | -2.340911               | 0.821680  | 1.517805  |
| 2                | 13               | 0              | -4.248497               | -0.889337 | 1.551941  |
| 3                | 13               | 0              | -4.308518               | 1.777656  | 0.182356  |
| 4                | 13               | 0              | -2.789818               | -1.686863 | -0.392571 |
| 5                | 13               | 0              | -5.100640               | -0.509929 | -0.956031 |
| 6                | 13               | 0              | -2.843087               | 0.714124  | -1.624700 |
| 7                | 13               | 0              | -0.676746               | -0.092482 | -0.334015 |
| 8                | 53               | 0              | 3.690773                | -0.101378 | 0.014020  |
| 9                | 6                | 0              | 5.777324                | -0.252866 | 0.178597  |
| 10               | 6                | 0              | 6.612594                | 0.693119  | -0.173910 |
| 11               | 1                | 0              | 6.091389                | -1.194497 | 0.585249  |
| 12               | 1                | 0              | 7.672250                | 0.538067  | -0.057762 |
| 13               | 1                | 0              | 6.292724                | 1.634907  | -0.580895 |

-----  
 Low frequencies (cm<sup>-1</sup>): 10.7029                    6.5226                    9.2898  
 -----

Coordinate of TS

| Center<br>Number | Atomic<br>Number | Atomic<br>Type | Coordinates (Angstroms) |           |           |
|------------------|------------------|----------------|-------------------------|-----------|-----------|
|                  |                  |                | X                       | Y         | Z         |
| 1                | 13               | 0              | 2.072437                | -1.184680 | -1.227595 |
| 2                | 13               | 0              | 4.077049                | -1.445336 | 0.378829  |



|    |    |   |           |           |           |
|----|----|---|-----------|-----------|-----------|
| 3  | 13 | 0 | 4.016865  | 0.489451  | -1.508118 |
| 4  | 13 | 0 | 2.061076  | -0.455839 | 1.653219  |
| 5  | 13 | 0 | 4.006300  | 1.154022  | 1.117818  |
| 6  | 13 | 0 | 2.002006  | 1.680611  | -0.420672 |
| 7  | 13 | 0 | 0.046458  | -0.035702 | 0.005999  |
| 8  | 53 | 0 | -2.888880 | -0.140636 | 0.001571  |
| 9  | 6  | 0 | -5.173062 | -0.243974 | -0.008381 |
| 10 | 6  | 0 | -5.917265 | 0.829097  | -0.001595 |
| 11 | 1  | 0 | -5.515927 | -1.261463 | -0.019154 |
| 12 | 1  | 0 | -6.994284 | 0.748183  | -0.006707 |
| 13 | 1  | 0 | -5.505665 | 1.823386  | 0.009198  |

-----

Low frequencies (cm<sup>-1</sup>): -181.8346                    -13.1149                    7.6223  
                                         11.6027                    16.6007                    17.6246

Optimized geometry after C-I dissociation

| Center<br>Number | Atomic<br>Number | Atomic<br>Type | Coordinates (Angstroms) |           |           |
|------------------|------------------|----------------|-------------------------|-----------|-----------|
|                  |                  |                | X                       | Y         | Z         |
| 1                | 13               | 0              | 0.889607                | -2.010569 | -0.897172 |
| 2                | 13               | 0              | 3.021566                | -1.776924 | 0.957776  |
| 3                | 13               | 0              | 3.208552                | -0.950503 | -1.433427 |
| 4                | 13               | 0              | 1.048045                | -0.370467 | 1.707957  |
| 5                | 13               | 0              | 3.209645                | 1.087399  | 1.018640  |
| 6                | 13               | 0              | 1.259146                | 0.717352  | -0.925009 |
| 7                | 13               | 0              | -0.912487               | -0.496426 | -0.043501 |
| 8                | 53               | 0              | -3.367880               | 0.033656  | 0.024060  |
| 9                | 6                | 0              | 2.005161                | 2.572094  | -0.796706 |
| 10               | 6                | 0              | 1.468048                | 3.558211  | -0.077812 |
| 11               | 1                | 0              | 0.688832                | 3.384118  | 0.646591  |
| 12               | 1                | 0              | 1.785016                | 4.584834  | -0.183094 |
| 13               | 1                | 0              | 2.771589                | 2.867270  | -1.500030 |

-----

Low frequencies (cm<sup>-1</sup>): 33.3409                    45.5520                    50.6540  
                                         61.3285                    78.0575                    101.5393

Al<sub>7</sub> .... C<sub>6</sub>H<sub>5</sub>I (M062X/TZVP, LANL2DZ level of theory)

Optimized geometry of reactant

| Center<br>Number | Atomic<br>Number | Atomic<br>Type | Coordinates (Angstroms) |           |           |
|------------------|------------------|----------------|-------------------------|-----------|-----------|
|                  |                  |                | X                       | Y         | Z         |
| 1                | 13               | 0              | -3.085993               | 0.607962  | -1.684777 |
| 2                | 13               | 0              | -4.705239               | 0.499613  | 0.320208  |
| 3                | 13               | 0              | -3.609164               | -1.723944 | -0.728353 |
| 4                | 13               | 0              | -2.380323               | 1.423138  | 0.947935  |

|    |    |   |           |           |           |
|----|----|---|-----------|-----------|-----------|
| 5  | 13 | 0 | -2.888833 | -0.957041 | 1.745148  |
| 6  | 13 | 0 | -1.214649 | -0.931658 | -0.203866 |
| 7  | 13 | 0 | -0.678475 | 1.509608  | -1.066812 |
| 8  | 53 | 0 | 2.595366  | -1.602866 | -0.005353 |
| 9  | 6  | 0 | 1.988040  | 1.103099  | 1.242561  |
| 10 | 6  | 0 | 2.573055  | 0.499779  | 0.138165  |
| 11 | 6  | 0 | 3.112519  | 1.258383  | -0.891273 |
| 12 | 6  | 0 | 3.075585  | 2.644880  | -0.803403 |
| 13 | 6  | 0 | 2.495179  | 3.263277  | 0.296373  |
| 14 | 6  | 0 | 1.954465  | 2.491335  | 1.315972  |
| 15 | 1  | 0 | 1.555297  | 0.504325  | 2.033510  |
| 16 | 1  | 0 | 3.560405  | 0.776564  | -1.749685 |
| 17 | 1  | 0 | 3.495541  | 3.238769  | -1.605137 |
| 18 | 1  | 0 | 2.462871  | 4.343251  | 0.357787  |
| 19 | 1  | 0 | 1.493219  | 2.964653  | 2.173583  |

-----  
 Low frequencies (cm<sup>-1</sup>): 10.0397                    16.6349                    23.9952  
                                  34.6324                    50.0824                    64.4715

Coordinate of TS

| Center<br>Number | Atomic<br>Number | Atomic<br>Type | Coordinates (Angstroms) |           |           |
|------------------|------------------|----------------|-------------------------|-----------|-----------|
|                  |                  |                | X                       | Y         | Z         |
| 1                | 13               | 0              | -3.102358               | -1.381661 | -0.935201 |
| 2                | 13               | 0              | -5.007848               | 0.233609  | -1.541308 |
| 3                | 13               | 0              | -5.085931               | -1.280014 | 0.693904  |
| 4                | 13               | 0              | -2.914377               | 1.481933  | -0.729431 |
| 5                | 13               | 0              | -4.909374               | 1.411061  | 0.887486  |
| 6                | 13               | 0              | -3.001942               | -0.127763 | 1.658227  |
| 7                | 13               | 0              | -0.988414               | -0.140866 | -0.015672 |
| 8                | 53               | 0              | 1.835134                | -0.146780 | -0.011915 |
| 9                | 6                | 0              | 4.888181                | -1.136109 | 0.010690  |
| 10               | 6                | 0              | 4.138591                | 0.022987  | 0.001257  |
| 11               | 6                | 0              | 4.710169                | 1.279177  | -0.000032 |
| 12               | 6                | 0              | 6.099135                | 1.374331  | 0.008019  |
| 13               | 6                | 0              | 6.879159                | 0.224814  | 0.017375  |
| 14               | 6                | 0              | 6.276271                | -1.026377 | 0.018715  |
| 15               | 1                | 0              | 4.413497                | -2.109401 | 0.011779  |
| 16               | 1                | 0              | 4.097497                | 2.172193  | -0.006985 |
| 17               | 1                | 0              | 6.568678                | 2.350560  | 0.007031  |
| 18               | 1                | 0              | 7.958659                | 0.304523  | 0.023628  |
| 19               | 1                | 0              | 6.883682                | -1.923368 | 0.025851  |

-----  
 Low frequencies (cm<sup>-1</sup>): -106.5954                    10.2511                    13.2924  
                                  16.6006                    43.0802                    45.6123

Optimized geometry after C-I dissociation

| Center<br>Number | Atomic<br>Number | Atomic<br>Type | Coordinates (Angstroms) |   |   |
|------------------|------------------|----------------|-------------------------|---|---|
|                  |                  |                | X                       | Y | Z |

|    |    |   |           |           |           |
|----|----|---|-----------|-----------|-----------|
| 1  | 13 | 0 | -0.551667 | -2.135196 | 1.488864  |
| 2  | 13 | 0 | -2.183375 | -3.603279 | 0.000208  |
| 3  | 13 | 0 | -2.968777 | -1.404339 | 1.322724  |
| 4  | 13 | 0 | -0.551960 | -2.135349 | -1.488954 |
| 5  | 13 | 0 | -2.969011 | -1.404364 | -1.322350 |
| 6  | 13 | 0 | -1.329870 | 0.198263  | -0.000063 |
| 7  | 13 | 0 | 1.103407  | -0.884950 | -0.000194 |
| 8  | 6  | 0 | -1.422537 | 2.166511  | -0.000125 |
| 9  | 6  | 0 | -0.251191 | 2.932994  | 0.000545  |
| 10 | 6  | 0 | -0.297592 | 4.322077  | 0.000652  |
| 11 | 6  | 0 | -1.523043 | 4.974498  | 0.000173  |
| 12 | 6  | 0 | -2.699103 | 4.234649  | -0.000500 |
| 13 | 6  | 0 | -2.645907 | 2.846645  | -0.000670 |
| 14 | 1  | 0 | 0.721269  | 2.448630  | 0.000955  |
| 15 | 1  | 0 | 0.622422  | 4.893760  | 0.001135  |
| 16 | 1  | 0 | -1.562128 | 6.056755  | 0.000295  |
| 17 | 1  | 0 | -3.657281 | 4.740105  | -0.000893 |
| 18 | 1  | 0 | -3.576682 | 2.288695  | -0.001224 |
| 19 | 53 | 0 | 3.459527  | -0.028159 | -0.000071 |

-----  
 Low frequencies (cm<sup>-1</sup>): 18.4477                    26.1191                    38.7273  
                                  49.9300                    56.3588                    97.2314

Al<sub>7</sub> .... C<sub>6</sub>H<sub>5</sub>I (B3PW91/TZVP, LANL2DZ level of theory)

Optimized geometry of reactant

| Center<br>Number | Atomic<br>Number | Atomic<br>Type | Coordinates (Angstroms) |           |           |
|------------------|------------------|----------------|-------------------------|-----------|-----------|
|                  |                  |                | X                       | Y         | Z         |
| 1                | 13               | 0              | -2.911548               | -0.013085 | -1.586981 |
| 2                | 13               | 0              | -5.296150               | 0.762316  | -1.002377 |
| 3                | 13               | 0              | -4.349483               | -1.657585 | -0.198434 |
| 4                | 13               | 0              | -3.579543               | 2.037462  | 0.430817  |
| 5                | 13               | 0              | -4.916454               | 0.195912  | 1.651752  |
| 6                | 13               | 0              | -2.480060               | -0.540130 | 1.203306  |
| 7                | 13               | 0              | -1.102407               | 1.274775  | -0.142412 |
| 8                | 53               | 0              | 2.240282                | -1.298013 | -0.192715 |
| 9                | 6                | 0              | 4.749515                | -0.071469 | 1.033854  |
| 10               | 6                | 0              | 3.833678                | 0.085509  | 0.003518  |
| 11               | 6                | 0              | 3.941861                | 1.132050  | -0.900880 |
| 12               | 6                | 0              | 4.989570                | 2.035854  | -0.766249 |
| 13               | 6                | 0              | 5.915093                | 1.893053  | 0.259050  |
| 14               | 6                | 0              | 5.792427                | 0.839725  | 1.155626  |
| 15               | 1                | 0              | 4.656175                | -0.891398 | 1.734709  |
| 16               | 1                | 0              | 3.222526                | 1.246315  | -1.701901 |
| 17               | 1                | 0              | 5.076678                | 2.855447  | -1.470797 |
| 18               | 1                | 0              | 6.730007                | 2.600626  | 0.359148  |
| 19               | 1                | 0              | 6.510192                | 0.719708  | 1.959471  |

Low frequencies (cm<sup>-1</sup>): 6.8374                      9.4913                      11.0629  
                                  14.1858                      17.4716                      21.5092

Coordinate of TS

| Center<br>Number | Atomic<br>Number | Atomic<br>Type | Coordinates (Angstroms) |           |           |
|------------------|------------------|----------------|-------------------------|-----------|-----------|
|                  |                  |                | X                       | Y         | Z         |
| 1                | 13               | 0              | 2.759437                | -0.809731 | -1.435176 |
| 2                | 13               | 0              | 4.932228                | -0.705183 | 0.008284  |
| 3                | 13               | 0              | 3.906266                | 1.488693  | -1.352138 |
| 4                | 13               | 0              | 2.755932                | -0.789886 | 1.448479  |
| 5                | 13               | 0              | 3.906561                | 1.505593  | 1.338186  |
| 6                | 13               | 0              | 1.710472                | 1.699193  | -0.007821 |
| 7                | 13               | 0              | 0.601746                | -0.568255 | 0.001901  |
| 8                | 53               | 0              | -1.879936               | -1.562817 | -0.000635 |
| 9                | 6                | 0              | -4.610868               | 0.103871  | 0.002774  |
| 10               | 6                | 0              | -3.250627               | 0.316997  | 0.000123  |
| 11               | 6                | 0              | -2.665009               | 1.555111  | -0.002472 |
| 12               | 6                | 0              | -3.502665               | 2.668622  | -0.002233 |
| 13               | 6                | 0              | -4.882111               | 2.502892  | 0.000487  |
| 14               | 6                | 0              | -5.435237               | 1.227692  | 0.002954  |
| 15               | 1                | 0              | -5.036099               | -0.893502 | 0.004718  |
| 16               | 1                | 0              | -1.580130               | 1.672372  | -0.004692 |
| 17               | 1                | 0              | -3.069674               | 3.663387  | -0.004213 |
| 18               | 1                | 0              | -5.530454               | 3.371568  | 0.000665  |
| 19               | 1                | 0              | -6.512291               | 1.098832  | 0.005048  |

Low frequencies (cm<sup>-1</sup>): -222.1687                      2.2308                      26.2426  
                                  26.3414                      35.3059                      43.6324

Optimized geometry after C-I dissociation

| Center<br>Number | Atomic<br>Number | Atomic<br>Type | Coordinates (Angstroms) |           |           |
|------------------|------------------|----------------|-------------------------|-----------|-----------|
|                  |                  |                | X                       | Y         | Z         |
| 1                | 13               | 0              | 0.056668                | -2.227308 | -1.519222 |
| 2                | 13               | 0              | 1.281869                | -3.985899 | 0.069571  |
| 3                | 13               | 0              | 2.584738                | -2.036029 | -1.279351 |
| 4                | 13               | 0              | 0.027238                | -2.175894 | 1.558566  |
| 5                | 13               | 0              | 2.561513                | -1.984345 | 1.360110  |
| 6                | 13               | 0              | 1.352105                | -0.034169 | -0.018421 |
| 7                | 13               | 0              | -1.269200               | -0.616292 | -0.021658 |
| 8                | 6                | 0              | 1.930299                | 1.860987  | -0.001797 |
| 9                | 6                | 0              | 1.027387                | 2.878070  | 0.334141  |
| 10               | 6                | 0              | 1.415797                | 4.212774  | 0.351443  |
| 11               | 6                | 0              | 2.721794                | 4.560309  | 0.030771  |
| 12               | 6                | 0              | 3.635621                | 3.568933  | -0.306077 |
| 13               | 6                | 0              | 3.242343                | 2.236292  | -0.320617 |
| 14               | 1                | 0              | -0.000763               | 2.635721  | 0.587654  |
| 15               | 1                | 0              | 0.696643                | 4.981275  | 0.614300  |
| 16               | 1                | 0              | 3.026882                | 5.601039  | 0.042698  |

|    |    |   |           |          |           |
|----|----|---|-----------|----------|-----------|
| 17 | 1  | 0 | 4.656997  | 3.834248 | -0.558061 |
| 18 | 1  | 0 | 3.975505  | 1.480301 | -0.586021 |
| 19 | 53 | 0 | -3.432619 | 0.666838 | -0.048538 |

-----  
 Low frequencies (cm<sup>-1</sup>): 6.0898                    22.9866                    34.8784  
                                  46.8295                    55.6904                    83.9707

Al<sub>7</sub> .... C<sub>6</sub>H<sub>5</sub>I (BHandHLYP/TZVP, LANL2DZ level of theory)

Optimized geometry of reactant

| Center<br>Number | Atomic<br>Number | Atomic<br>Type | Coordinates (Angstroms) |           |           |
|------------------|------------------|----------------|-------------------------|-----------|-----------|
|                  |                  |                | X                       | Y         | Z         |
| 1                | 13               | 0              | 4.277310                | 0.078433  | 1.505757  |
| 2                | 13               | 0              | 4.812008                | 0.900167  | -0.860797 |
| 3                | 13               | 0              | 3.608873                | -1.783015 | -0.119898 |
| 4                | 13               | 0              | 2.460838                | 1.833713  | -0.435282 |
| 5                | 13               | 0              | 2.732800                | -0.213403 | -2.108224 |
| 6                | 13               | 0              | 1.388149                | -0.556016 | 0.164396  |
| 7                | 13               | 0              | 1.946484                | 1.202249  | 2.073491  |
| 8                | 53               | 0              | -2.426988               | -1.655675 | 0.081739  |
| 9                | 6                | 0              | -3.178274               | 0.934679  | -1.309986 |
| 10               | 6                | 0              | -3.122493               | 0.327907  | -0.072103 |
| 11               | 6                | 0              | -3.513045               | 1.000014  | 1.067768  |
| 12               | 6                | 0              | -3.966469               | 2.301732  | 0.961885  |
| 13               | 6                | 0              | -4.027319               | 2.922162  | -0.270420 |
| 14               | 6                | 0              | -3.633268               | 2.237003  | -1.402913 |
| 15               | 1                | 0              | -2.873070               | 0.405617  | -2.193170 |
| 16               | 1                | 0              | -3.467098               | 0.521384  | 2.027749  |
| 17               | 1                | 0              | -4.271293               | 2.827634  | 1.848956  |
| 18               | 1                | 0              | -4.379888               | 3.934738  | -0.347597 |
| 19               | 1                | 0              | -3.677083               | 2.712733  | -2.366254 |

-----  
 Low frequencies (cm<sup>-1</sup>): 4.1784                    6.6708                    14.0182  
                                  17.0611                    18.3752                    20.6285

Coordinate of TS

| Center<br>Number | Atomic<br>Number | Atomic<br>Type | Coordinates (Angstroms) |           |           |
|------------------|------------------|----------------|-------------------------|-----------|-----------|
|                  |                  |                | X                       | Y         | Z         |
| 1                | 13               | 0              | -3.115379               | -1.481173 | -0.940825 |
| 2                | 13               | 0              | -4.982405               | 0.164725  | -1.585456 |
| 3                | 13               | 0              | -5.007372               | -1.346305 | 0.793230  |
| 4                | 13               | 0              | -3.004466               | 1.555390  | -0.697673 |
| 5                | 13               | 0              | -5.112046               | 1.322310  | 0.811545  |
| 6                | 13               | 0              | -3.038498               | 0.034098  | 1.713616  |
| 7                | 13               | 0              | -1.062813               | -0.081035 | -0.019844 |

|    |    |   |          |           |           |
|----|----|---|----------|-----------|-----------|
| 8  | 53 | 0 | 1.889958 | -0.124921 | -0.046886 |
| 9  | 6  | 0 | 4.906206 | -1.138562 | 0.065770  |
| 10 | 6  | 0 | 4.167151 | 0.018984  | 0.004093  |
| 11 | 6  | 0 | 4.757422 | 1.260143  | -0.025766 |
| 12 | 6  | 0 | 6.139576 | 1.341173  | 0.005697  |
| 13 | 6  | 0 | 6.903338 | 0.191051  | 0.067005  |
| 14 | 6  | 0 | 6.287681 | -1.045832 | 0.096842  |
| 15 | 1  | 0 | 4.427416 | -2.100467 | 0.088794  |
| 16 | 1  | 0 | 4.163291 | 2.154536  | -0.073609 |
| 17 | 1  | 0 | 6.616240 | 2.305448  | -0.017708 |
| 18 | 1  | 0 | 7.976191 | 0.258462  | 0.091306  |
| 19 | 1  | 0 | 6.879577 | -1.943030 | 0.144618  |

-----

Low frequencies (cm<sup>-1</sup>): -153.3197                    8.2878                    10.0858  
                                         10.9189                    23.5624                    34.2228

Optimized geometry after C-I dissociation

-----

| Center<br>Number | Atomic<br>Number | Atomic<br>Type | Coordinates (Angstroms) |           |           |
|------------------|------------------|----------------|-------------------------|-----------|-----------|
|                  |                  |                | X                       | Y         | Z         |
| 1                | 13               | 0              | -0.023238               | -2.214438 | -1.563350 |
| 2                | 13               | 0              | 1.202057                | -4.016749 | 0.000376  |
| 3                | 13               | 0              | 2.512393                | -2.053031 | -1.317856 |
| 4                | 13               | 0              | -0.023626               | -2.214257 | 1.563592  |
| 5                | 13               | 0              | 2.512066                | -2.052888 | 1.318711  |
| 6                | 13               | 0              | 1.345340                | -0.039485 | 0.000174  |
| 7                | 13               | 0              | -1.277220               | -0.607703 | -0.000125 |
| 8                | 6                | 0              | 1.965323                | 1.830669  | 0.000144  |
| 9                | 6                | 0              | 1.053856                | 2.885634  | -0.000029 |
| 10               | 6                | 0              | 1.471968                | 4.203695  | -0.000052 |
| 11               | 6                | 0              | 2.820967                | 4.499928  | 0.000098  |
| 12               | 6                | 0              | 3.746691                | 3.473516  | 0.000271  |
| 13               | 6                | 0              | 3.320912                | 2.158970  | 0.000293  |
| 14               | 1                | 0              | -0.005335               | 2.688390  | -0.000150 |
| 15               | 1                | 0              | 0.745040                | 4.996873  | -0.000187 |
| 16               | 1                | 0              | 3.149614                | 5.524203  | 0.000081  |
| 17               | 1                | 0              | 4.799226                | 3.697292  | 0.000389  |
| 18               | 1                | 0              | 4.064283                | 1.379556  | 0.000429  |
| 19               | 53               | 0              | -3.400984               | 0.735479  | -0.000466 |

-----

Low frequencies (cm<sup>-1</sup>): 16.7738                    23.1378                    26.0381  
                                         41.8361                    55.5021                    78.2433

Al<sub>8</sub> .... C<sub>2</sub>H<sub>5</sub>I (M062X/TZVP, LANL2DZ level of theory)



| Center<br>Number | Atomic<br>Number | Atomic<br>Type | Coordinates (Angstroms) |           |           |
|------------------|------------------|----------------|-------------------------|-----------|-----------|
|                  |                  |                | X                       | Y         | Z         |
| 1                | 13               | 0              | 0.592735                | -0.606659 | 0.313927  |
| 2                | 13               | 0              | -1.359375               | -0.215710 | -1.554278 |
| 3                | 13               | 0              | -0.383121               | 1.979001  | -0.190673 |
| 4                | 13               | 0              | -1.166073               | 0.499417  | 1.742176  |
| 5                | 13               | 0              | -3.497772               | -0.527544 | 1.462048  |
| 6                | 13               | 0              | -2.899119               | 1.268965  | -0.218858 |
| 7                | 13               | 0              | -4.039372               | -1.266913 | -1.370788 |
| 8                | 13               | 0              | -1.670165               | -1.857131 | 0.356139  |
| 9                | 6                | 0              | 0.834119                | 3.442435  | -0.684679 |
| 10               | 6                | 0              | 2.041233                | 3.576937  | 0.254563  |
| 11               | 1                | 0              | 0.253510                | 4.370095  | -0.699912 |
| 12               | 1                | 0              | 2.681023                | 4.414111  | -0.033002 |
| 13               | 1                | 0              | 1.728769                | 3.742302  | 1.287555  |
| 14               | 1                | 0              | 2.657550                | 2.675731  | 0.245120  |
| 15               | 1                | 0              | 1.167026                | 3.278586  | -1.713960 |
| 16               | 53               | 0              | 3.051876                | -0.965125 | -0.066436 |

-----  
Low frequencies (cm<sup>-1</sup>): 20.6277                    28.5370                    45.7432  
                                         61.1800                    82.1011                    101.9869  
-----

Al<sub>8</sub> .... C<sub>2</sub>H<sub>5</sub>I (B3PW91/TZVP, LANL2DZ level of theory)

Optimized geometry of reactant

| Center<br>Number | Atomic<br>Number | Atomic<br>Type | Coordinates (Angstroms) |           |           |
|------------------|------------------|----------------|-------------------------|-----------|-----------|
|                  |                  |                | X                       | Y         | Z         |
| 1                | 13               | 0              | 0.021128                | 0.084509  | -0.234601 |
| 2                | 13               | 0              | 1.613206                | -1.427097 | 1.094504  |
| 3                | 13               | 0              | 0.348275                | 2.608855  | -0.374502 |
| 4                | 13               | 0              | 2.667073                | 1.851599  | -1.065846 |
| 5                | 13               | 0              | 4.162899                | 0.308151  | 0.274055  |
| 6                | 13               | 0              | 2.011661                | 1.090253  | 1.572594  |
| 7                | 13               | 0              | 3.885112                | -2.215221 | 0.281131  |
| 8                | 13               | 0              | 2.144638                | -0.665032 | -1.537303 |
| 9                | 53               | 0              | -2.901878               | -0.862893 | -0.231245 |
| 10               | 6                | 0              | -3.873995               | 1.587977  | 1.389110  |
| 11               | 6                | 0              | -3.758370               | 1.156583  | -0.046861 |
| 12               | 1                | 0              | -2.898061               | 1.637581  | 1.874214  |
| 13               | 1                | 0              | -4.310780               | 2.592392  | 1.413754  |
| 14               | 1                | 0              | -4.520381               | 0.925944  | 1.966717  |
| 15               | 1                | 0              | -4.712721               | 1.074407  | -0.560143 |
| 16               | 1                | 0              | -3.066258               | 1.767414  | -0.622463 |

-----  
Low frequencies (cm<sup>-1</sup>): 20.2398                    27.6608                    37.3973  
                                         40.4263                    47.2212                    53.9727  
-----



Coordinate of TS

| Center Number | Atomic Number | Atomic Type | Coordinates (Angstroms) |           |           |
|---------------|---------------|-------------|-------------------------|-----------|-----------|
|               |               |             | X                       | Y         | Z         |
| 1             | 13            | 0           | -0.435396               | -0.157766 | 0.004427  |
| 2             | 13            | 0           | 1.730066                | -0.693614 | 1.347159  |
| 3             | 13            | 0           | 0.573128                | 2.130959  | 0.033756  |
| 4             | 13            | 0           | 2.776480                | 1.663979  | -1.308128 |
| 5             | 13            | 0           | 4.200747                | -0.168828 | 0.000756  |
| 6             | 13            | 0           | 2.775822                | 1.626481  | 1.359856  |
| 7             | 13            | 0           | 3.417548                | -2.660383 | -0.046153 |
| 8             | 13            | 0           | 1.724582                | -0.653034 | -1.361384 |
| 9             | 53            | 0           | -2.933080               | -0.905080 | 0.000151  |
| 10            | 6             | 0           | -3.228960               | 2.476585  | -0.169104 |
| 11            | 6             | 0           | -4.153620               | 1.386410  | 0.127795  |
| 12            | 1             | 0           | -3.303261               | 2.826367  | -1.198436 |
| 13            | 1             | 0           | -3.367833               | 3.312875  | 0.522143  |
| 14            | 1             | 0           | -2.150047               | 2.184715  | -0.016003 |
| 15            | 1             | 0           | -4.468498               | 1.240134  | 1.153805  |
| 16            | 1             | 0           | -4.880372               | 1.085865  | -0.615417 |

Low frequencies (cm<sup>-1</sup>): -124.3147      20.9247      33.4922  
 45.0341      51.1110      54.0888

Optimized geometry after C-I dissociation

| Center Number | Atomic Number | Atomic Type | Coordinates (Angstroms) |           |           |
|---------------|---------------|-------------|-------------------------|-----------|-----------|
|               |               |             | X                       | Y         | Z         |
| 1             | 13            | 0           | 0.742026                | -0.577837 | 0.273687  |
| 2             | 13            | 0           | -1.279538               | -0.368625 | -1.604150 |
| 3             | 13            | 0           | -0.517356               | 1.914566  | -0.190064 |
| 4             | 13            | 0           | -1.104560               | 0.343906  | 1.776566  |
| 5             | 13            | 0           | -3.318064               | -0.928135 | 1.477461  |
| 6             | 13            | 0           | -2.952250               | 0.945462  | -0.194939 |
| 7             | 13            | 0           | -3.830929               | -1.701652 | -1.362545 |
| 8             | 13            | 0           | -1.378992               | -2.062461 | 0.326759  |
| 9             | 6             | 0           | 0.466849                | 3.556377  | -0.695698 |
| 10            | 6             | 0           | 0.186447                | 4.766098  | 0.203689  |
| 11            | 1             | 0           | 0.215172                | 3.787759  | -1.737069 |
| 12            | 1             | 0           | 0.753926                | 5.644266  | -0.119724 |
| 13            | 1             | 0           | -0.870739               | 5.045262  | 0.194421  |
| 14            | 1             | 0           | 0.459798                | 4.570936  | 1.243983  |
| 15            | 1             | 0           | 1.536415                | 3.317863  | -0.690521 |
| 16            | 53            | 0           | 3.232100                | -0.766959 | -0.046700 |

Low frequencies (cm<sup>-1</sup>): 6.9139      36.7153      46.3394  
 60.8292      80.3981      97.0932



35.4401            41.5555            47.5961

Optimized geometry after C-I dissociation

| Center<br>Number | Atomic<br>Number | Atomic<br>Type | Coordinates (Angstroms) |           |           |
|------------------|------------------|----------------|-------------------------|-----------|-----------|
|                  |                  |                | X                       | Y         | Z         |
| 1                | 13               | 0              | 0.623768                | -0.596103 | 0.265087  |
| 2                | 13               | 0              | -1.373451               | -0.212200 | -1.613171 |
| 3                | 13               | 0              | -0.450177               | 2.006265  | -0.172132 |
| 4                | 13               | 0              | -1.116368               | 0.473094  | 1.788335  |
| 5                | 13               | 0              | -3.425793               | -0.613075 | 1.515358  |
| 6                | 13               | 0              | -2.931410               | 1.211556  | -0.167949 |
| 7                | 13               | 0              | -4.053765               | -1.354096 | -1.376546 |
| 8                | 13               | 0              | -1.605584               | -1.889358 | 0.331012  |
| 9                | 6                | 0              | 0.662266                | 3.548502  | -0.687415 |
| 10               | 6                | 0              | 1.864482                | 3.834676  | 0.213366  |
| 11               | 1                | 0              | 0.006136                | 4.416700  | -0.722651 |
| 12               | 1                | 0              | 2.414275                | 4.708594  | -0.123644 |
| 13               | 1                | 0              | 1.562386                | 4.019445  | 1.239216  |
| 14               | 1                | 0              | 2.560800                | 3.002965  | 0.229686  |
| 15               | 1                | 0              | 0.992278                | 3.392514  | -1.712652 |
| 16               | 53               | 0              | 3.087354                | -0.965630 | -0.065577 |

Low frequencies (cm<sup>-1</sup>): 28.0673            36.6996            47.4837  
64.0390            78.2876            87.6885

Al<sub>8</sub> .... C<sub>2</sub>H<sub>3</sub>I (M062X/TZVP, LANL2DZ level of theory)

Optimized geometry of reactant

| Center<br>Number | Atomic<br>Number | Atomic<br>Type | Coordinates (Angstroms) |           |           |
|------------------|------------------|----------------|-------------------------|-----------|-----------|
|                  |                  |                | X                       | Y         | Z         |
| 1                | 13               | 0              | -0.043794               | 0.123934  | -0.157200 |
| 2                | 13               | 0              | -2.081494               | -0.518660 | -1.593384 |
| 3                | 13               | 0              | -0.318506               | 2.651366  | -0.006505 |
| 4                | 13               | 0              | -2.054237               | 0.909376  | 1.634474  |
| 5                | 13               | 0              | -4.125217               | 0.275532  | 0.203998  |
| 6                | 13               | 0              | -2.575176               | 1.931956  | -0.934957 |
| 7                | 13               | 0              | -3.872965               | -2.247658 | -0.051719 |
| 8                | 13               | 0              | -1.642082               | -1.539741 | 0.946131  |
| 9                | 53               | 0              | 3.032737                | -0.856038 | -0.057462 |
| 10               | 6                | 0              | 3.881204                | 1.061867  | -0.263753 |
| 11               | 6                | 0              | 3.615544                | 2.048301  | 0.566646  |
| 12               | 1                | 0              | 2.949344                | 1.942819  | 1.413506  |
| 13               | 1                | 0              | 4.075691                | 3.016783  | 0.404073  |
| 14               | 1                | 0              | 4.534559                | 1.130020  | -1.120383 |

Low frequencies (cm<sup>-1</sup>): 16.7599            26.7530            33.9522



Optimized geometry of reactant

| Center Number | Atomic Number | Atomic Type | Coordinates (Angstroms) |           |           |
|---------------|---------------|-------------|-------------------------|-----------|-----------|
|               |               |             | X                       | Y         | Z         |
| 1             | 13            | 0           | -0.059039               | 0.209941  | -0.090838 |
| 2             | 13            | 0           | -2.043668               | -0.436846 | -1.650722 |
| 3             | 13            | 0           | -0.462680               | 2.711606  | 0.136395  |
| 4             | 13            | 0           | -2.199059               | 0.854488  | 1.697728  |
| 5             | 13            | 0           | -4.195877               | 0.186450  | 0.131088  |
| 6             | 13            | 0           | -2.680655               | 1.967397  | -0.854044 |
| 7             | 13            | 0           | -3.819626               | -2.309682 | -0.171738 |
| 8             | 13            | 0           | -1.638458               | -1.550524 | 0.888904  |
| 9             | 53            | 0           | 3.032853                | -0.843655 | 0.006361  |
| 10            | 6             | 0           | 4.110589                | 0.919350  | -0.455282 |
| 11            | 6             | 0           | 4.026047                | 2.026487  | 0.253967  |
| 12            | 1             | 0           | 3.398308                | 2.127530  | 1.130398  |
| 13            | 1             | 0           | 4.606569                | 2.892383  | -0.050131 |
| 14            | 1             | 0           | 4.721918                | 0.791986  | -1.337555 |

Low frequencies (cm<sup>-1</sup>): 13.8767      22.8966      27.6765  
 35.3377      47.5275      49.3485

Coordinate of TS

| Center Number | Atomic Number | Atomic Type | Coordinates (Angstroms) |           |           |
|---------------|---------------|-------------|-------------------------|-----------|-----------|
|               |               |             | X                       | Y         | Z         |
| 1             | 13            | 0           | -0.526244               | -0.422234 | -0.000003 |
| 2             | 13            | 0           | 1.689740                | -0.615024 | 1.373517  |
| 3             | 13            | 0           | 0.494934                | 1.888020  | -0.000491 |
| 4             | 13            | 0           | 2.719405                | 1.710754  | -1.325877 |
| 5             | 13            | 0           | 4.067709                | -0.214107 | 0.000170  |
| 6             | 13            | 0           | 2.719193                | 1.711025  | 1.325604  |
| 7             | 13            | 0           | 3.317116                | -2.746759 | 0.000057  |
| 8             | 13            | 0           | 1.690006                | -0.615525 | -1.372971 |
| 9             | 53            | 0           | -3.025309               | -0.828706 | -0.000073 |
| 10            | 6             | 0           | -3.858651               | 1.874617  | 0.000344  |
| 11            | 6             | 0           | -2.866050               | 2.661526  | 0.000181  |
| 12            | 1             | 0           | -1.777305               | 2.229641  | -0.000069 |
| 13            | 1             | 0           | -2.856627               | 3.748415  | 0.000192  |
| 14            | 1             | 0           | -4.910643               | 1.676555  | 0.000490  |

Low frequencies (cm<sup>-1</sup>): -111.7779      28.4611      41.0411  
 47.4812      54.3091      85.8104

Optimized geometry after C-I dissociation

| Center Number | Atomic Number | Atomic Type | Coordinates (Angstroms) |           |          |
|---------------|---------------|-------------|-------------------------|-----------|----------|
|               |               |             | X                       | Y         | Z        |
| 1             | 13            | 0           | 0.777905                | -0.544188 | 0.232517 |

|    |    |   |           |           |           |
|----|----|---|-----------|-----------|-----------|
| 2  | 13 | 0 | -1.259436 | -0.019429 | -1.556623 |
| 3  | 13 | 0 | -0.560982 | 1.944589  | 0.303786  |
| 4  | 13 | 0 | -1.081794 | -0.008858 | 1.900603  |
| 5  | 13 | 0 | -3.267825 | -1.239884 | 1.352755  |
| 6  | 13 | 0 | -2.963557 | 0.938812  | 0.086246  |
| 7  | 13 | 0 | -3.771793 | -1.444508 | -1.588311 |
| 8  | 13 | 0 | -1.305008 | -2.069707 | -0.007680 |
| 9  | 53 | 0 | 3.269494  | -0.614798 | -0.107974 |
| 10 | 6  | 0 | 0.346694  | 3.668304  | 0.108598  |
| 11 | 6  | 0 | -0.199794 | 4.701232  | -0.538994 |
| 12 | 1  | 0 | -1.179737 | 4.645376  | -1.008390 |
| 13 | 1  | 0 | 0.303768  | 5.661807  | -0.635113 |
| 14 | 1  | 0 | 1.333713  | 3.821169  | 0.545711  |

-----  
 Low frequencies (cm<sup>-1</sup>): 16.9611                      35.7519                      48.2037  
                                  64.7594                      81.8891                      94.7918

Al<sub>8</sub> .... C<sub>2</sub>H<sub>3</sub>I (BHandHLYP/TZVP, LANL2DZ level of theory)

Optimized geometry of reactant

| Center<br>Number | Atomic<br>Number | Atomic<br>Type | Coordinates (Angstroms) |           |           |
|------------------|------------------|----------------|-------------------------|-----------|-----------|
|                  |                  |                | X                       | Y         | Z         |
| 1                | 13               | 0              | -0.289470               | 0.269768  | 0.068928  |
| 2                | 13               | 0              | -2.155896               | -0.295293 | -1.641329 |
| 3                | 13               | 0              | -0.472888               | 2.827836  | -0.026135 |
| 4                | 13               | 0              | -2.527932               | 0.564736  | 1.888927  |
| 5                | 13               | 0              | -4.404971               | 0.114239  | 0.097595  |
| 6                | 13               | 0              | -2.828228               | 1.979652  | -0.574518 |
| 7                | 13               | 0              | -3.789744               | -2.248810 | -0.553553 |
| 8                | 13               | 0              | -1.742785               | -1.683979 | 0.820197  |
| 9                | 53               | 0              | 3.260149                | -0.823543 | 0.041967  |
| 10               | 6                | 0              | 4.237217                | 0.935302  | -0.560382 |
| 11               | 6                | 0              | 4.223576                | 2.048190  | 0.129242  |
| 12               | 1                | 0              | 3.706778                | 2.154173  | 1.065057  |
| 13               | 1                | 0              | 4.749296                | 2.909639  | -0.247234 |
| 14               | 1                | 0              | 4.746149                | 0.817071  | -1.496664 |

-----  
 Low frequencies (cm<sup>-1</sup>): 5.8058                      16.1928                      18.1861  
                                  21.6044                      23.1612                      39.7907

Coordinate of TS

| Center<br>Number | Atomic<br>Number | Atomic<br>Type | Coordinates (Angstroms) |           |           |
|------------------|------------------|----------------|-------------------------|-----------|-----------|
|                  |                  |                | X                       | Y         | Z         |
| 1                | 13               | 0              | 0.514403                | -0.417370 | -0.000008 |
| 2                | 13               | 0              | -1.687135               | -0.612159 | -1.385304 |
| 3                | 13               | 0              | -0.467612               | 1.901807  | 0.000042  |



|    |    |   |           |           |           |
|----|----|---|-----------|-----------|-----------|
| 1  | 13 | 0 | 0.756767  | -0.638677 | 0.627145  |
| 2  | 13 | 0 | 3.052831  | -1.737322 | 0.769961  |
| 3  | 13 | 0 | 0.165575  | 1.773605  | 1.292020  |
| 4  | 13 | 0 | 2.050853  | 2.037687  | -0.414221 |
| 5  | 13 | 0 | 4.354186  | 0.947690  | -0.264621 |
| 6  | 13 | 0 | 2.919428  | 0.611112  | 1.850442  |
| 7  | 13 | 0 | 4.803350  | -1.445757 | -1.044334 |
| 8  | 13 | 0 | 2.170627  | -0.305099 | -1.495571 |
| 9  | 6  | 0 | -2.841151 | 0.382308  | -0.270235 |
| 10 | 6  | 0 | -2.140645 | 0.945969  | -1.327080 |
| 11 | 6  | 0 | -2.139045 | 2.328508  | -1.475798 |
| 12 | 6  | 0 | -2.820650 | 3.133250  | -0.572322 |
| 13 | 6  | 0 | -3.513767 | 2.553093  | 0.482710  |
| 14 | 6  | 0 | -3.527085 | 1.171578  | 0.640767  |
| 15 | 1  | 0 | -1.591172 | 0.322864  | -2.020552 |
| 16 | 1  | 0 | -1.586673 | 2.771976  | -2.294649 |
| 17 | 1  | 0 | -2.808823 | 4.209162  | -0.687954 |
| 18 | 1  | 0 | -4.046370 | 3.173338  | 1.192377  |
| 19 | 1  | 0 | -4.060768 | 0.720292  | 1.466484  |
| 20 | 53 | 0 | -2.784324 | -1.706565 | 0.005762  |

-----  
 Low frequencies (cm<sup>-1</sup>): 13.9902                    16.5776                    20.7895  
                                  30.9550                    41.6726                    57.4868

Coordinate of TS

| Center<br>Number | Atomic<br>Number | Atomic<br>Type | Coordinates (Angstroms) |           |           |
|------------------|------------------|----------------|-------------------------|-----------|-----------|
|                  |                  |                | X                       | Y         | Z         |
| 1                | 13               | 0              | -1.118927               | -2.197095 | -0.000012 |
| 2                | 13               | 0              | -2.237430               | -0.126651 | -1.400113 |
| 3                | 13               | 0              | -0.067062               | 0.439183  | 0.000026  |
| 4                | 13               | 0              | -1.444281               | 2.292574  | 1.275844  |
| 5                | 13               | 0              | -3.773786               | 1.491436  | 0.000003  |
| 6                | 13               | 0              | -1.444255               | 2.292606  | -1.275774 |
| 7                | 13               | 0              | -4.571005               | -1.155507 | -0.000045 |
| 8                | 13               | 0              | -2.237460               | -0.126685 | 1.400111  |
| 9                | 53               | 0              | 1.685849                | -1.909490 | 0.000003  |
| 10               | 6                | 0              | 2.786738                | 0.898525  | -1.214586 |
| 11               | 6                | 0              | 2.394182                | 0.346813  | 0.000004  |
| 12               | 6                | 0              | 2.786819                | 0.898512  | 1.214572  |
| 13               | 6                | 0              | 3.516762                | 2.079369  | 1.208315  |
| 14               | 6                | 0              | 3.873355                | 2.668987  | -0.000034 |
| 15               | 6                | 0              | 3.516681                | 2.079381  | -1.208366 |
| 16               | 1                | 0              | 2.488164                | 0.436888  | -2.149452 |
| 17               | 1                | 0              | 2.488309                | 0.436866  | 2.149454  |
| 18               | 1                | 0              | 3.804404                | 2.540779  | 2.144701  |
| 19               | 1                | 0              | 4.442317                | 3.589931  | -0.000048 |
| 20               | 1                | 0              | 3.804260                | 2.540801  | -2.144767 |

-----  
 Low frequencies (cm<sup>-1</sup>): -301.9048                    22.7376                    26.1185  
                                  41.1497                    49.7929                    68.6928



Optimized geometry after C-I dissociation

| Center<br>Number | Atomic<br>Number | Atomic<br>Type | Coordinates (Angstroms) |           |           |
|------------------|------------------|----------------|-------------------------|-----------|-----------|
|                  |                  |                | X                       | Y         | Z         |
| 1                | 13               | 0              | 0.392687                | 1.303928  | 0.222990  |
| 2                | 13               | 0              | 1.604834                | -0.425758 | -1.512396 |
| 3                | 13               | 0              | -0.160122               | -1.441942 | 0.347112  |
| 4                | 13               | 0              | 1.504171                | -0.254342 | 1.869991  |
| 5                | 13               | 0              | 3.971247                | -0.710877 | 1.344933  |
| 6                | 13               | 0              | 2.322236                | -2.202063 | 0.131222  |
| 7                | 13               | 0              | 4.445315                | -0.934032 | -1.587302 |
| 8                | 13               | 0              | 2.958615                | 1.136402  | -0.040652 |
| 9                | 6                | 0              | -1.992599               | -2.081163 | 0.145841  |
| 10               | 6                | 0              | -3.068529               | -1.315668 | 0.613830  |
| 11               | 6                | 0              | -4.379759               | -1.745635 | 0.455724  |
| 12               | 6                | 0              | -4.640620               | -2.956598 | -0.172519 |
| 13               | 6                | 0              | -3.590034               | -3.733877 | -0.644097 |
| 14               | 6                | 0              | -2.281155               | -3.296472 | -0.487770 |
| 15               | 1                | 0              | -2.888367               | -0.365280 | 1.107491  |
| 16               | 1                | 0              | -5.197238               | -1.136175 | 0.820714  |
| 17               | 1                | 0              | -5.662110               | -3.294605 | -0.295807 |
| 18               | 1                | 0              | -3.791244               | -4.678299 | -1.134782 |
| 19               | 1                | 0              | -1.475937               | -3.917691 | -0.868198 |
| 20               | 53               | 0              | -1.561806               | 2.830970  | -0.173248 |

Low frequencies (cm<sup>-1</sup>): 21.0610                      33.5463                      38.0918  
                                         49.4042                      52.1808                      101.0765

Al<sub>8</sub> .... C<sub>6</sub>H<sub>5</sub>I (B3PW91/TZVP, LANL2DZ level of theory)

Optimized geometry of reactant

| Center<br>Number | Atomic<br>Number | Atomic<br>Type | Coordinates (Angstroms) |           |           |
|------------------|------------------|----------------|-------------------------|-----------|-----------|
|                  |                  |                | X                       | Y         | Z         |
| 1                | 13               | 0              | 0.789283                | 0.157736  | -0.070349 |
| 2                | 13               | 0              | 2.571762                | -1.448953 | 0.834563  |
| 3                | 13               | 0              | 0.952888                | 2.680590  | 0.214820  |
| 4                | 13               | 0              | 3.218413                | 2.192503  | -0.829792 |
| 5                | 13               | 0              | 4.931022                | 0.562963  | 0.085754  |
| 6                | 13               | 0              | 2.898510                | 0.977441  | 1.696399  |
| 7                | 13               | 0              | 4.792591                | -1.944700 | -0.297752 |
| 8                | 13               | 0              | 2.804493                | -0.240276 | -1.678883 |
| 9                | 6                | 0              | -3.606677               | -0.020702 | -0.022280 |
| 10               | 6                | 0              | -4.884933               | -0.499591 | -0.260832 |
| 11               | 6                | 0              | -5.936678               | 0.408122  | -0.316548 |
| 12               | 6                | 0              | -5.704529               | 1.765394  | -0.136795 |
| 13               | 6                | 0              | -4.414362               | 2.220758  | 0.099780  |

|    |    |   |           |           |           |
|----|----|---|-----------|-----------|-----------|
| 14 | 6  | 0 | -3.350487 | 1.327308  | 0.160784  |
| 15 | 1  | 0 | -5.067742 | -1.557084 | -0.403229 |
| 16 | 1  | 0 | -6.940850 | 0.044245  | -0.502654 |
| 17 | 1  | 0 | -6.528742 | 2.467690  | -0.181988 |
| 18 | 1  | 0 | -4.224260 | 3.278947  | 0.239731  |
| 19 | 1  | 0 | -2.343153 | 1.684859  | 0.341268  |
| 20 | 53 | 0 | -1.999543 | -1.420969 | 0.074535  |

-----  
 Low frequencies (cm<sup>-1</sup>): 7.0026                      7.0691                      21.5589  
                                  27.8534                      32.4143                      46.8598

Coordinate of TS

| -----  |        |        |                         |           |           |  |
|--------|--------|--------|-------------------------|-----------|-----------|--|
| Center | Atomic | Atomic | Coordinates (Angstroms) |           |           |  |
| Number | Number | Type   | X                       | Y         | Z         |  |
| -----  |        |        |                         |           |           |  |
| 1      | 13     | 0      | -1.089475               | -2.175639 | -0.000002 |  |
| 2      | 13     | 0      | -2.284679               | -0.151112 | -1.418013 |  |
| 3      | 13     | 0      | -0.113695               | 0.500563  | 0.000032  |  |
| 4      | 13     | 0      | -1.556555               | 2.308153  | 1.283027  |  |
| 5      | 13     | 0      | -3.836593               | 1.444706  | 0.000011  |  |
| 6      | 13     | 0      | -1.556529               | 2.308160  | -1.282984 |  |
| 7      | 13     | 0      | -4.646779               | -1.182736 | -0.000017 |  |
| 8      | 13     | 0      | -2.284695               | -0.151130 | 1.418030  |  |
| 9      | 53     | 0      | 1.720257                | -1.906005 | -0.000014 |  |
| 10     | 6      | 0      | 2.890232                | 0.896657  | -1.214987 |  |
| 11     | 6      | 0      | 2.505574                | 0.342109  | 0.000009  |  |
| 12     | 6      | 0      | 2.890425                | 0.896566  | 1.214985  |  |
| 13     | 6      | 0      | 3.620671                | 2.079268  | 1.207830  |  |
| 14     | 6      | 0      | 3.980132                | 2.668324  | -0.000022 |  |
| 15     | 6      | 0      | 3.620475                | 2.079362  | -1.207860 |  |
| 16     | 1      | 0      | 2.603698                | 0.431585  | -2.152071 |  |
| 17     | 1      | 0      | 2.604038                | 0.431427  | 2.152081  |  |
| 18     | 1      | 0      | 3.909205                | 2.539912  | 2.146325  |  |
| 19     | 1      | 0      | 4.552532                | 3.588992  | -0.000033 |  |
| 20     | 1      | 0      | 3.908854                | 2.540078  | -2.146367 |  |

-----  
 Low frequencies (cm<sup>-1</sup>): -246.1450                      11.2627                      17.7029  
                                  35.5003                      45.5209                      58.0317

Optimized geometry after C-I dissociation

| -----  |        |        |                         |           |           |  |
|--------|--------|--------|-------------------------|-----------|-----------|--|
| Center | Atomic | Atomic | Coordinates (Angstroms) |           |           |  |
| Number | Number | Type   | X                       | Y         | Z         |  |
| -----  |        |        |                         |           |           |  |
| 1      | 13     | 0      | 0.480986                | 1.282229  | 0.191742  |  |
| 2      | 13     | 0      | 1.559314                | -0.573710 | -1.542845 |  |
| 3      | 13     | 0      | -0.352701               | -1.419032 | 0.310430  |  |
| 4      | 13     | 0      | 1.385123                | -0.386690 | 1.904373  |  |
| 5      | 13     | 0      | 3.801285                | -1.088141 | 1.397658  |  |
| 6      | 13     | 0      | 2.053248                | -2.430301 | 0.137532  |  |
| 7      | 13     | 0      | 4.340768                | -1.355318 | -1.526215 |  |

|    |    |   |           |           |           |
|----|----|---|-----------|-----------|-----------|
| 8  | 13 | 0 | 3.032676  | 0.869771  | -0.008761 |
| 9  | 6  | 0 | -2.222231 | -1.981699 | 0.116126  |
| 10 | 6  | 0 | -3.250016 | -1.375236 | 0.852373  |
| 11 | 6  | 0 | -4.571417 | -1.781652 | 0.714786  |
| 12 | 6  | 0 | -4.894051 | -2.808313 | -0.164275 |
| 13 | 6  | 0 | -3.893286 | -3.425870 | -0.904920 |
| 14 | 6  | 0 | -2.573676 | -3.014525 | -0.765121 |
| 15 | 1  | 0 | -3.022591 | -0.570109 | 1.545174  |
| 16 | 1  | 0 | -5.350443 | -1.296432 | 1.293010  |
| 17 | 1  | 0 | -5.925143 | -3.126858 | -0.272770 |
| 18 | 1  | 0 | -4.141814 | -4.227446 | -1.592339 |
| 19 | 1  | 0 | -1.809065 | -3.511770 | -1.356027 |
| 20 | 53 | 0 | -1.193056 | 3.120224  | -0.187580 |

-----  
 Low frequencies (cm<sup>-1</sup>): 12.3053                      20.7924                      34.2031  
                                  50.2546                      54.2329                      90.4693

Al<sub>8</sub> .... C<sub>6</sub>H<sub>5</sub>I (BHandHLYP/TZVP, LANL2DZ level of theory)

Optimized geometry of reactant

| Center<br>Number | Atomic<br>Number | Atomic<br>Type | Coordinates (Angstroms) |           |           |
|------------------|------------------|----------------|-------------------------|-----------|-----------|
|                  |                  |                | X                       | Y         | Z         |
| 1                | 13               | 0              | -0.920645               | -0.058974 | -0.437910 |
| 2                | 13               | 0              | -2.821639               | -1.750727 | -0.285575 |
| 3                | 13               | 0              | -0.626552               | 2.378696  | -1.179067 |
| 4                | 13               | 0              | -2.932281               | 2.308285  | -0.057460 |
| 5                | 13               | 0              | -4.918773               | 0.752271  | 0.174693  |
| 6                | 13               | 0              | -3.410047               | 0.199963  | -1.915566 |
| 7                | 13               | 0              | -4.605334               | -1.392694 | 1.473360  |
| 8                | 13               | 0              | -2.463495               | 0.358749  | 1.603106  |
| 9                | 6                | 0              | 3.423040                | 0.089640  | 0.195588  |
| 10               | 6                | 0              | 3.258284                | 0.712330  | 1.415407  |
| 11               | 6                | 0              | 3.960523                | 1.874227  | 1.677565  |
| 12               | 6                | 0              | 4.816278                | 2.402235  | 0.730949  |
| 13               | 6                | 0              | 4.970771                | 1.766336  | -0.485289 |
| 14               | 6                | 0              | 4.273236                | 0.604862  | -0.760603 |
| 15               | 1                | 0              | 2.594533                | 0.304917  | 2.154518  |
| 16               | 1                | 0              | 3.834129                | 2.363540  | 2.626656  |
| 17               | 1                | 0              | 5.360449                | 3.305413  | 0.940053  |
| 18               | 1                | 0              | 5.634802                | 2.171134  | -1.227845 |
| 19               | 1                | 0              | 4.394349                | 0.114038  | -1.707759 |
| 20               | 53               | 0              | 2.359489                | -1.684891 | -0.213394 |

-----  
 Low frequencies (cm<sup>-1</sup>): 8.6472                      10.4900                      17.9415  
                                  21.6087                      22.9476                      31.1658

Coordinate of TS

-----

| Center<br>Number | Atomic<br>Number | Atomic<br>Type | Coordinates (Angstroms) |           |           |
|------------------|------------------|----------------|-------------------------|-----------|-----------|
|                  |                  |                | X                       | Y         | Z         |
| 1                | 13               | 0              | -1.107848               | -2.227046 | -0.000003 |
| 2                | 13               | 0              | -2.271935               | -0.159586 | -1.435340 |
| 3                | 13               | 0              | -0.098512               | 0.454305  | 0.000004  |
| 4                | 13               | 0              | -1.520988               | 2.290908  | 1.277349  |
| 5                | 13               | 0              | -3.824450               | 1.434745  | 0.000036  |
| 6                | 13               | 0              | -1.521007               | 2.290922  | -1.277301 |
| 7                | 13               | 0              | -4.786426               | -1.108485 | 0.000029  |
| 8                | 13               | 0              | -2.271914               | -0.159601 | 1.435373  |
| 9                | 53               | 0              | 1.754881                | -1.883163 | -0.000023 |
| 10               | 6                | 0              | 2.821353                | 0.924925  | -1.206751 |
| 11               | 6                | 0              | 2.386711                | 0.397131  | -0.000016 |
| 12               | 6                | 0              | 2.821374                | 0.924911  | 1.206718  |
| 13               | 6                | 0              | 3.619889                | 2.050331  | 1.201420  |
| 14               | 6                | 0              | 4.012497                | 2.614392  | -0.000018 |
| 15               | 6                | 0              | 3.619867                | 2.050344  | -1.201455 |
| 16               | 1                | 0              | 2.515705                | 0.481271  | -2.137600 |
| 17               | 1                | 0              | 2.515743                | 0.481247  | 2.137567  |
| 18               | 1                | 0              | 3.935809                | 2.487013  | 2.131960  |
| 19               | 1                | 0              | 4.638154                | 3.488774  | -0.000018 |
| 20               | 1                | 0              | 3.935770                | 2.487038  | -2.131995 |

Low frequencies (cm<sup>-1</sup>): -358.1026      21.1265      38.4276  
49.2447      51.8182      68.3415

Optimized geometry after C-I dissociation

| Center<br>Number | Atomic<br>Number | Atomic<br>Type | Coordinates (Angstroms) |           |           |
|------------------|------------------|----------------|-------------------------|-----------|-----------|
|                  |                  |                | X                       | Y         | Z         |
| 1                | 13               | 0              | 0.463819                | 1.295668  | 0.185748  |
| 2                | 13               | 0              | 1.557395                | -0.546897 | -1.560869 |
| 3                | 13               | 0              | -0.316303               | -1.439218 | 0.319778  |
| 4                | 13               | 0              | 1.377989                | -0.346223 | 1.910705  |
| 5                | 13               | 0              | 3.807486                | -1.003739 | 1.424452  |
| 6                | 13               | 0              | 2.102993                | -2.373063 | 0.148221  |
| 7                | 13               | 0              | 4.386688                | -1.288277 | -1.558853 |
| 8                | 13               | 0              | 3.008060                | 0.913190  | -0.009461 |
| 9                | 6                | 0              | -2.171492               | -2.018106 | 0.122187  |
| 10               | 6                | 0              | -3.219298               | -1.350977 | 0.756802  |
| 11               | 6                | 0              | -4.529437               | -1.766337 | 0.613577  |
| 12               | 6                | 0              | -4.823148               | -2.865795 | -0.170360 |
| 13               | 6                | 0              | -3.804230               | -3.545832 | -0.810082 |
| 14               | 6                | 0              | -2.496631               | -3.123773 | -0.664081 |
| 15               | 1                | 0              | -3.018599               | -0.490475 | 1.373146  |
| 16               | 1                | 0              | -5.319684               | -1.232851 | 1.111730  |
| 17               | 1                | 0              | -5.842279               | -3.191041 | -0.282958 |
| 18               | 1                | 0              | -4.028375               | -4.402029 | -1.421759 |
| 19               | 1                | 0              | -1.721401               | -3.671068 | -1.175096 |

20 53 0 -1.261319 3.080446 -0.186221

-----  
Low frequencies (cm<sup>-1</sup>): 14.6622 22.0820 35.7222  
51.8707 56.7431 85.0300

Al<sub>13</sub> .... C<sub>2</sub>H<sub>5</sub>I (M062X/TZVP, LANL2DZ level of theory)

Optimized geometry of reactant

-----

| Center<br>Number | Atomic<br>Number | Atomic<br>Type | Coordinates (Angstroms) |           |           |
|------------------|------------------|----------------|-------------------------|-----------|-----------|
|                  |                  |                | X                       | Y         | Z         |
| 1                | 13               | 0              | -0.867836               | -0.589154 | 0.124166  |
| 2                | 13               | 0              | 0.279948                | 0.379756  | -2.156972 |
| 3                | 13               | 0              | 3.047379                | -0.598417 | -2.217957 |
| 4                | 13               | 0              | 3.389203                | -2.128034 | 0.039780  |
| 5                | 13               | 0              | 1.039006                | -2.024543 | 1.630321  |
| 6                | 13               | 0              | 0.900857                | -2.257166 | -1.099008 |
| 7                | 13               | 0              | 1.762763                | -0.005761 | 0.002824  |
| 8                | 13               | 0              | 3.196066                | -0.409104 | 2.176812  |
| 9                | 13               | 0              | 0.440409                | 0.578993  | 2.218339  |
| 10               | 13               | 0              | 0.091756                | 2.093890  | -0.028146 |
| 11               | 13               | 0              | 2.436485                | 2.003904  | -1.632105 |
| 12               | 13               | 0              | 4.420098                | 0.549356  | -0.114230 |
| 13               | 13               | 0              | 2.601602                | 2.240023  | 1.097582  |
| 14               | 6                | 0              | -4.002639               | 1.516841  | -0.477162 |
| 15               | 6                | 0              | -3.890542               | 2.311304  | 0.801413  |
| 16               | 1                | 0              | -4.852700               | 1.804562  | -1.087327 |
| 17               | 1                | 0              | -3.716875               | 3.361942  | 0.552849  |
| 18               | 1                | 0              | -4.801606               | 2.244510  | 1.395211  |
| 19               | 1                | 0              | -3.052219               | 1.967156  | 1.408654  |
| 20               | 1                | 0              | -3.091468               | 1.543702  | -1.070040 |
| 21               | 53               | 0              | -4.315408               | -0.598668 | -0.069493 |

-----

Low frequencies (cm<sup>-1</sup>): 15.1927 18.2652 28.3726  
33.8126 61.6967 70.3884

Coordinate of TS

-----

| Center<br>Number | Atomic<br>Number | Atomic<br>Type | Coordinates (Angstroms) |           |           |
|------------------|------------------|----------------|-------------------------|-----------|-----------|
|                  |                  |                | X                       | Y         | Z         |
| 1                | 13               | 0              | -0.867836               | -0.589154 | 0.124166  |
| 2                | 13               | 0              | 0.279948                | 0.379756  | -2.156972 |

-----



Al<sub>13</sub> .... C<sub>2</sub>H<sub>5</sub>I (B3PW91/TZVP, LANL2DZ level of theory)

Optimized geometry of reactant

| Center<br>Number | Atomic<br>Number | Atomic<br>Type | Coordinates (Angstroms) |           |           |
|------------------|------------------|----------------|-------------------------|-----------|-----------|
|                  |                  |                | X                       | Y         | Z         |
| 1                | 13               | 0              | -0.871158               | -0.411885 | 0.119758  |
| 2                | 13               | 0              | 0.228844                | 1.409313  | -1.603703 |
| 3                | 13               | 0              | 2.963455                | 0.412694  | -2.341540 |
| 4                | 13               | 0              | 3.226686                | -2.008156 | -1.062679 |
| 5                | 13               | 0              | 0.969198                | -2.485953 | 0.624443  |
| 6                | 13               | 0              | 0.673621                | -1.446679 | -1.899929 |
| 7                | 13               | 0              | 1.818458                | 0.014896  | 0.005489  |
| 8                | 13               | 0              | 3.316270                | -1.435695 | 1.625606  |
| 9                | 13               | 0              | 0.686088                | -0.393499 | 2.374517  |
| 10               | 13               | 0              | 0.325716                | 1.990187  | 1.087175  |
| 11               | 13               | 0              | 2.546738                | 2.518933  | -0.635388 |
| 12               | 13               | 0              | 4.523413                | 0.410517  | -0.064043 |
| 13               | 13               | 0              | 2.921072                | 1.500514  | 1.894867  |
| 14               | 6                | 0              | -4.392751               | 1.393140  | -0.749798 |
| 15               | 6                | 0              | -4.604142               | 2.404898  | 0.344704  |
| 16               | 1                | 0              | -5.210227               | 1.351276  | -1.464352 |
| 17               | 1                | 0              | -4.656190               | 3.402305  | -0.105485 |
| 18               | 1                | 0              | -5.534452               | 2.230870  | 0.886999  |
| 19               | 1                | 0              | -3.779896               | 2.403118  | 1.059160  |
| 20               | 1                | 0              | -3.448023               | 1.523649  | -1.273124 |
| 21               | 53               | 0              | -4.276586               | -0.654280 | 0.032225  |

Low frequencies (cm<sup>-1</sup>): 16.3460      18.1210      20.3875  
27.2832      40.6178      41.6290

Coordinate of TS

| Center<br>Number | Atomic<br>Number | Atomic<br>Type | Coordinates (Angstroms) |           |           |
|------------------|------------------|----------------|-------------------------|-----------|-----------|
|                  |                  |                | X                       | Y         | Z         |
| 1                | 13               | 0              | -0.913186               | -0.107120 | -0.027653 |
| 2                | 13               | 0              | 0.502703                | 1.465932  | -1.808109 |
| 3                | 13               | 0              | 3.091098                | 0.135100  | -2.314463 |
| 4                | 13               | 0              | 3.071686                | -2.189421 | -0.839902 |
| 5                | 13               | 0              | 0.690893                | -2.325653 | 0.752144  |
| 6                | 13               | 0              | 0.651405                | -1.464378 | -1.860074 |
| 7                | 13               | 0              | 1.794967                | 0.030277  | 0.008511  |
| 8                | 13               | 0              | 3.055604                | -1.460605 | 1.804562  |
| 9                | 13               | 0              | 0.533334                | -0.075505 | 2.343533  |
| 10               | 13               | 0              | 0.460201                | 2.233570  | 0.833652  |
| 11               | 13               | 0              | 2.840263                | 2.394774  | -0.761799 |
| 12               | 13               | 0              | 4.471238                | 0.162627  | 0.100918  |

|    |    |   |           |           |           |
|----|----|---|-----------|-----------|-----------|
| 13 | 13 | 0 | 2.903692  | 1.578035  | 1.855428  |
| 14 | 6  | 0 | -6.340327 | -0.303058 | -0.032830 |
| 15 | 6  | 0 | -6.798333 | 1.105593  | -0.046969 |
| 16 | 1  | 0 | -6.394450 | -0.869316 | 0.889390  |
| 17 | 1  | 0 | -7.899138 | 1.145432  | -0.053309 |
| 18 | 1  | 0 | -6.465957 | 1.653005  | 0.837226  |
| 19 | 1  | 0 | -6.456125 | 1.638313  | -0.936351 |
| 20 | 1  | 0 | -6.382654 | -0.884080 | -0.946370 |
| 21 | 53 | 0 | -3.557932 | -0.234109 | -0.008293 |

-----  
 Low frequencies (cm<sup>-1</sup>): -133.3454            17.2765            24.5457  
                                  32.9204            36.1882            41.7965

Optimized geometry after C-I dissociation

| -----  |        |        |                         |           |           |  |
|--------|--------|--------|-------------------------|-----------|-----------|--|
| Center | Atomic | Atomic | Coordinates (Angstroms) |           |           |  |
| Number | Number | Type   | X                       | Y         | Z         |  |
| -----  |        |        |                         |           |           |  |
| 1      | 13     | 0      | -1.181375               | -0.994724 | 0.216855  |  |
| 2      | 13     | 0      | -0.151436               | 2.069997  | -0.390030 |  |
| 3      | 13     | 0      | 2.161337                | 1.740391  | -1.775013 |  |
| 4      | 13     | 0      | 2.798611                | -0.975882 | -2.060335 |  |
| 5      | 13     | 0      | 0.627673                | -2.491918 | -1.094474 |  |
| 6      | 13     | 0      | 0.210159                | -0.133933 | -2.471018 |  |
| 7      | 13     | 0      | 1.235867                | -0.073249 | -0.013351 |  |
| 8      | 13     | 0      | 2.856702                | -2.133487 | 0.388653  |  |
| 9      | 13     | 0      | 0.625169                | -1.980020 | 1.870671  |  |
| 10     | 13     | 0      | 0.080706                | 0.732827  | 2.241712  |  |
| 11     | 13     | 0      | 2.093786                | 2.268683  | 1.055372  |  |
| 12     | 13     | 0      | 3.876540                | 0.530991  | -0.043300 |  |
| 13     | 13     | 0      | 2.668538                | -0.161784 | 2.299412  |  |
| 14     | 6      | 0      | -1.835722               | 3.077553  | -0.728944 |  |
| 15     | 6      | 0      | -2.445706               | 3.761024  | 0.494821  |  |
| 16     | 1      | 0      | -2.550556               | 2.389091  | -1.187329 |  |
| 17     | 1      | 0      | -3.328569               | 4.345939  | 0.216344  |  |
| 18     | 1      | 0      | -2.762068               | 3.032142  | 1.244234  |  |
| 19     | 1      | 0      | -1.742290               | 4.443571  | 0.978623  |  |
| 20     | 1      | 0      | -1.575727               | 3.812023  | -1.499368 |  |
| 21     | 53     | 0      | -3.680789               | -0.721261 | -0.024052 |  |

-----  
 Low frequencies (cm<sup>-1</sup>): 29.3257            29.8836            33.0199  
                                  44.2596            53.5186            56.4820

Al<sub>13</sub> .... C<sub>2</sub>H<sub>5</sub>I (BHandHLYP/TZVP, LANL2DZ level of theory)

Optimized geometry of reactant

| -----  |        |        |                         |           |           |  |
|--------|--------|--------|-------------------------|-----------|-----------|--|
| Center | Atomic | Atomic | Coordinates (Angstroms) |           |           |  |
| Number | Number | Type   | X                       | Y         | Z         |  |
| -----  |        |        |                         |           |           |  |
| 1      | 13     | 0      | 0.799870                | -0.402316 | -0.141267 |  |



|    |    |   |           |           |           |
|----|----|---|-----------|-----------|-----------|
| 2  | 13 | 0 | -0.179148 | 1.029651  | 1.996764  |
| 3  | 13 | 0 | -2.878629 | 0.134072  | 2.459144  |
| 4  | 13 | 0 | -3.201447 | -2.057190 | 0.773576  |
| 5  | 13 | 0 | -0.816598 | -2.442251 | -0.600691 |
| 6  | 13 | 0 | -0.708942 | -1.553169 | 1.964999  |
| 7  | 13 | 0 | -1.802028 | 0.055226  | 0.007118  |
| 8  | 13 | 0 | -2.547921 | -1.270788 | -2.270388 |
| 9  | 13 | 0 | -0.446920 | 0.387608  | -2.354443 |
| 10 | 13 | 0 | -0.170344 | 2.237285  | -0.364521 |
| 11 | 13 | 0 | -2.548442 | 2.379276  | 1.100867  |
| 12 | 13 | 0 | -4.349906 | -0.000668 | -0.730724 |
| 13 | 13 | 0 | -2.634083 | 1.953648  | -1.656867 |
| 14 | 6  | 0 | 4.313269  | 1.280498  | 0.699153  |
| 15 | 6  | 0 | 4.566640  | 2.275660  | -0.396807 |
| 16 | 1  | 0 | 5.170976  | 1.102427  | 1.326187  |
| 17 | 1  | 0 | 4.796506  | 3.235504  | 0.058602  |
| 18 | 1  | 0 | 5.405807  | 1.988225  | -1.017225 |
| 19 | 1  | 0 | 3.696785  | 2.405593  | -1.027606 |
| 20 | 1  | 0 | 3.453656  | 1.522968  | 1.302605  |
| 21 | 53 | 0 | 3.839544  | -0.706541 | -0.091378 |

-----

Low frequencies (cm<sup>-1</sup>): 7.8691                    23.1950                    29.6406  
                                         30.1774                    34.6484                    39.7908

Coordinate of TS

| Center | Atomic | Atomic | Coordinates (Angstroms) |           |           |
|--------|--------|--------|-------------------------|-----------|-----------|
| Number | Number | Type   | X                       | Y         | Z         |
| 1      | 13     | 0      | -0.820582               | -1.199979 | 0.056542  |
| 2      | 13     | 0      | 0.417180                | 2.496043  | -0.137887 |
| 3      | 13     | 0      | 2.935384                | 1.960687  | -1.385830 |
| 4      | 13     | 0      | 3.021621                | -0.565911 | -2.256547 |
| 5      | 13     | 0      | 0.819184                | -1.899050 | -1.870097 |
| 6      | 13     | 0      | 0.486362                | 0.886470  | -2.286538 |
| 7      | 13     | 0      | 1.525946                | 0.026035  | -0.000565 |
| 8      | 13     | 0      | 2.713771                | -2.401755 | 0.127774  |
| 9      | 13     | 0      | 0.811403                | -1.706816 | 2.047952  |
| 10     | 13     | 0      | 0.455755                | 1.113345  | 2.170935  |
| 11     | 13     | 0      | 2.910815                | 2.106260  | 1.185077  |
| 12     | 13     | 0      | 4.204319                | -0.163700 | 0.029164  |
| 13     | 13     | 0      | 2.992971                | -0.313347 | 2.326222  |
| 14     | 6      | 0      | -5.934247               | 0.237163  | -0.020945 |
| 15     | 6      | 0      | -6.031824               | 1.723894  | -0.028669 |
| 16     | 1      | 0      | -6.258580               | -0.259611 | 0.876535  |
| 17     | 1      | 0      | -7.082200               | 2.016612  | -0.040405 |
| 18     | 1      | 0      | -5.579589               | 2.160983  | 0.852826  |
| 19     | 1      | 0      | -5.562134               | 2.153106  | -0.904896 |
| 20     | 1      | 0      | -6.240235               | -0.267865 | -0.920235 |
| 21     | 53     | 0      | -3.578198               | -0.414476 | 0.006664  |

Low frequencies (cm<sup>-1</sup>): -291.7833                      8.0577                      8.6003  
                                          17.5803                      25.9572                      28.4224

Optimized geometry after C-I dissociation

| Center<br>Number | Atomic<br>Number | Atomic<br>Type | Coordinates (Angstroms) |           |           |
|------------------|------------------|----------------|-------------------------|-----------|-----------|
|                  |                  |                | X                       | Y         | Z         |
| 1                | 13               | 0              | 1.462099                | -0.950811 | -0.942055 |
| 2                | 13               | 0              | 0.043087                | 2.206738  | 0.543752  |
| 3                | 13               | 0              | -2.514228               | 1.941366  | 1.212723  |
| 4                | 13               | 0              | -3.181748               | -0.513738 | 1.750837  |
| 5                | 13               | 0              | -0.863138               | -2.041418 | 1.932113  |
| 6                | 13               | 0              | -0.701838               | 0.505656  | 2.667490  |
| 7                | 13               | 0              | -0.968782               | -0.128574 | 0.027506  |
| 8                | 13               | 0              | -2.938055               | -2.327127 | -0.166643 |
| 9                | 13               | 0              | -0.401193               | -2.710055 | -0.696466 |
| 10               | 13               | 0              | 0.075538                | 0.563030  | -2.463115 |
| 11               | 13               | 0              | -1.869342               | 2.025794  | -1.487081 |
| 12               | 13               | 0              | -3.596372               | 0.319065  | -0.731714 |
| 13               | 13               | 0              | -2.082539               | -0.947135 | -2.381436 |
| 14               | 6                | 0              | 1.591422                | 3.423867  | 0.661182  |
| 15               | 6                | 0              | 1.921836                | 4.239269  | -0.586973 |
| 16               | 1                | 0              | 2.445114                | 2.814432  | 0.948579  |
| 17               | 1                | 0              | 2.777487                | 4.886904  | -0.418621 |
| 18               | 1                | 0              | 2.162806                | 3.600255  | -1.429710 |
| 19               | 1                | 0              | 1.092243                | 4.870489  | -0.888405 |
| 20               | 1                | 0              | 1.402257                | 4.085178  | 1.504030  |
| 21               | 53               | 0              | 3.717268                | -0.745139 | 0.177020  |

Low frequencies (cm<sup>-1</sup>): 18.6380                      28.2342                      36.0057  
                                          41.6349                      58.9125                      63.1136

Al<sub>13</sub> ..... C<sub>2</sub>H<sub>3</sub>I (M062X/TZVP, LANL2DZ level of theory)

Optimized geometry of reactant

| Center<br>Number | Atomic<br>Number | Atomic<br>Type | Coordinates (Angstroms) |           |           |
|------------------|------------------|----------------|-------------------------|-----------|-----------|
|                  |                  |                | X                       | Y         | Z         |
| 1                | 13               | 0              | -0.822861               | -0.702475 | 0.040682  |
| 2                | 13               | 0              | 0.352185                | 0.312113  | -2.207156 |
| 3                | 13               | 0              | 3.151667                | -0.555517 | -2.188234 |
| 4                | 13               | 0              | 3.519291                | -2.056671 | 0.084225  |
| 5                | 13               | 0              | 1.115528                | -2.061272 | 1.610734  |
| 6                | 13               | 0              | 1.064272                | -2.304394 | -1.118781 |
| 7                | 13               | 0              | 1.780673                | -0.016002 | -0.001679 |
| 8                | 13               | 0              | 3.177118                | -0.349023 | 2.213476  |

|    |    |   |           |           |           |
|----|----|---|-----------|-----------|-----------|
| 9  | 13 | 0 | 0.377223  | 0.518067  | 2.173776  |
| 10 | 13 | 0 | 0.023628  | 2.013762  | -0.091195 |
| 11 | 13 | 0 | 2.425515  | 2.022363  | -1.621178 |
| 12 | 13 | 0 | 4.397201  | 0.655228  | -0.046618 |
| 13 | 13 | 0 | 2.485220  | 2.270608  | 1.110345  |
| 14 | 53 | 0 | -4.552940 | -0.504672 | -0.077022 |
| 15 | 6  | 0 | -4.219834 | 1.567489  | -0.188784 |
| 16 | 6  | 0 | -3.612958 | 2.252890  | 0.759509  |
| 17 | 1  | 0 | -3.245491 | 1.799563  | 1.671442  |
| 18 | 1  | 0 | -3.469295 | 3.320932  | 0.635598  |
| 19 | 1  | 0 | -4.589243 | 1.996615  | -1.108375 |

-----  
 Low frequencies (cm<sup>-1</sup>): 16.0217                    8.8711                    11.8405  
                                  27.2007                    61.9729                    69.7295

#### Coordinate of TS

| Center<br>Number | Atomic<br>Number | Atomic<br>Type | Coordinates (Angstroms) |           |           |
|------------------|------------------|----------------|-------------------------|-----------|-----------|
|                  |                  |                | X                       | Y         | Z         |
| 1                | 13               | 0              | -0.833559               | -0.219733 | -0.817791 |
| 2                | 13               | 0              | 1.146117                | -0.419071 | -2.606994 |
| 3                | 13               | 0              | 3.382737                | -1.454610 | -1.296905 |
| 4                | 13               | 0              | 2.724350                | -2.045453 | 1.304360  |
| 5                | 13               | 0              | 0.083762                | -1.398454 | 1.671420  |
| 6                | 13               | 0              | 0.851730                | -2.414125 | -0.766493 |
| 7                | 13               | 0              | 1.607228                | 0.035409  | 0.016715  |
| 8                | 13               | 0              | 1.733300                | 0.467011  | 2.682931  |
| 9                | 13               | 0              | -0.066632               | 1.763499  | 1.166838  |
| 10               | 13               | 0              | 0.618774                | 2.022463  | -1.485314 |
| 11               | 13               | 0              | 3.237870                | 1.206073  | -1.736782 |
| 12               | 13               | 0              | 3.962653                | 0.343713  | 1.158465  |
| 13               | 13               | 0              | 2.492744                | 2.516190  | 0.560717  |
| 14               | 53               | 0              | -3.359538               | -0.246961 | 0.045854  |
| 15               | 6                | 0              | -5.929052               | -0.110334 | -0.060519 |
| 16               | 6                | 0              | -6.472919               | 1.074804  | -0.004803 |
| 17               | 1                | 0              | -5.882786               | 1.982447  | 0.069157  |
| 18               | 1                | 0              | -7.555957               | 1.192553  | -0.029204 |
| 19               | 1                | 0              | -6.327898               | -1.110761 | -0.143473 |

-----  
 Low frequencies (cm<sup>-1</sup>): -284.5976                    -22.9351                    21.7834  
                                  23.3713                    31.5315                    36.8676

#### Optimized geometry after C-I dissociation

| Center<br>Number | Atomic<br>Number | Atomic<br>Type | Coordinates (Angstroms) |           |           |
|------------------|------------------|----------------|-------------------------|-----------|-----------|
|                  |                  |                | X                       | Y         | Z         |
| 1                | 13               | 0              | -1.210458               | -0.901092 | -0.044878 |
| 2                | 13               | 0              | -0.170586               | 1.973585  | -0.580452 |
| 3                | 13               | 0              | 2.163571                | 1.687262  | -1.783658 |
| 4                | 13               | 0              | 2.705072                | -1.018537 | -2.035642 |

|    |    |   |           |           |           |
|----|----|---|-----------|-----------|-----------|
| 5  | 13 | 0 | 0.625801  | -2.517045 | -1.042560 |
| 6  | 13 | 0 | 0.162623  | -0.142073 | -2.406812 |
| 7  | 13 | 0 | 1.240378  | -0.091367 | 0.012109  |
| 8  | 13 | 0 | 2.778966  | -2.148341 | 0.503414  |
| 9  | 13 | 0 | 0.453576  | -1.929661 | 1.818587  |
| 10 | 13 | 0 | 0.046647  | 0.749197  | 2.234640  |
| 11 | 13 | 0 | 2.061946  | 2.238248  | 0.997969  |
| 12 | 13 | 0 | 3.848577  | 0.476076  | -0.041214 |
| 13 | 13 | 0 | 2.631976  | -0.178104 | 2.329540  |
| 14 | 53 | 0 | -3.709040 | -0.590008 | 0.014953  |
| 15 | 6  | 0 | -1.839979 | 2.970408  | -0.348514 |
| 16 | 6  | 0 | -1.871232 | 4.158837  | 0.252826  |
| 17 | 1  | 0 | -0.984692 | 4.621843  | 0.676889  |
| 18 | 1  | 0 | -2.792139 | 4.728136  | 0.351089  |
| 19 | 1  | 0 | -2.771954 | 2.569081  | -0.739921 |

-----  
 Low frequencies (cm<sup>-1</sup>): 16.9938                    27.7261                    31.4142  
                                  44.3833                    66.0437                    82.7986

Al<sub>13</sub> .... C<sub>2</sub>H<sub>3</sub>I (B3PW91/TZVP, LANL2DZ level of theory)

Optimized geometry of reactant

| Center<br>Number | Atomic<br>Number | Atomic<br>Type | Coordinates (Angstroms) |           |           |
|------------------|------------------|----------------|-------------------------|-----------|-----------|
|                  |                  |                | X                       | Y         | Z         |
| 1                | 13               | 0              | -0.833503               | -0.241026 | -0.043960 |
| 2                | 13               | 0              | 0.635274                | -0.016257 | -2.348952 |
| 3                | 13               | 0              | 3.274884                | -1.263551 | -1.840475 |
| 4                | 13               | 0              | 3.218617                | -2.201538 | 0.739239  |
| 5                | 13               | 0              | 0.766340                | -1.435748 | 2.002922  |
| 6                | 13               | 0              | 0.817389                | -2.357045 | -0.587260 |
| 7                | 13               | 0              | 1.869644                | 0.011610  | 0.004927  |
| 8                | 13               | 0              | 3.079915                | 0.019298  | 2.359776  |
| 9                | 13               | 0              | 0.449684                | 1.282680  | 1.849224  |
| 10               | 13               | 0              | 0.472088                | 2.202380  | -0.735475 |
| 11               | 13               | 0              | 2.931956                | 1.456411  | -2.006402 |
| 12               | 13               | 0              | 4.573928                | 0.265585  | 0.056846  |
| 13               | 13               | 0              | 2.886094                | 2.386607  | 0.582555  |
| 14               | 53               | 0              | -4.561696               | -0.588401 | -0.122461 |
| 15               | 6                | 0              | -4.939795               | 1.489050  | -0.129497 |
| 16               | 6                | 0              | -4.660281               | 2.287255  | 0.882382  |
| 17               | 1                | 0              | -4.212672               | 1.942594  | 1.806441  |
| 18               | 1                | 0              | -4.883469               | 3.346714  | 0.798002  |
| 19               | 1                | 0              | -5.383555               | 1.815806  | -1.059886 |

-----  
 Low frequencies (cm<sup>-1</sup>): 4.7047                    10.4321                    11.8441  
                                  18.0715                    24.3508                    41.4083

Coordinate of TS

| Center Number | Atomic Number | Atomic Type | Coordinates (Angstroms) |           |           |
|---------------|---------------|-------------|-------------------------|-----------|-----------|
|               |               |             | X                       | Y         | Z         |
| 1             | 13            | 0           | -0.966520               | -0.059701 | -0.120730 |
| 2             | 13            | 0           | 0.546391                | 1.196669  | -2.043389 |
| 3             | 13            | 0           | 3.087543                | -0.264060 | -2.244684 |
| 4             | 13            | 0           | 2.971117                | -2.338487 | -0.446304 |
| 5             | 13            | 0           | 0.554013                | -2.176202 | 1.067895  |
| 6             | 13            | 0           | 0.607287                | -1.717124 | -1.648639 |
| 7             | 13            | 0           | 1.735920                | 0.017458  | 0.024397  |
| 8             | 13            | 0           | 2.899200                | -1.223901 | 2.069185  |
| 9             | 13            | 0           | 0.400828                | 0.298474  | 2.295372  |
| 10            | 13            | 0           | 0.461605                | 2.360811  | 0.451647  |
| 11            | 13            | 0           | 2.879289                | 2.208472  | -1.065360 |
| 12            | 13            | 0           | 4.406605                | 0.095956  | 0.198752  |
| 13            | 13            | 0           | 2.837158                | 1.804531  | 1.657768  |
| 14            | 53            | 0           | -3.542058               | -0.110805 | -0.087937 |
| 15            | 6             | 0           | -6.495399               | -0.208681 | -0.261498 |
| 16            | 6             | 0           | -7.181339               | 0.593850  | 0.501993  |
| 17            | 1             | 0           | -6.707004               | 1.290773  | 1.188476  |
| 18            | 1             | 0           | -8.274325               | 0.601094  | 0.485445  |
| 19            | 1             | 0           | -6.694826               | -0.967861 | -1.003069 |

Low frequencies (cm<sup>-1</sup>): -63.9649      12.6703      19.5786  
26.8456      34.8192      37.6288

Optimized geometry after C-I dissociation

| Center Number | Atomic Number | Atomic Type | Coordinates (Angstroms) |           |           |
|---------------|---------------|-------------|-------------------------|-----------|-----------|
|               |               |             | X                       | Y         | Z         |
| 1             | 13            | 0           | -1.255409               | -0.977375 | -0.108679 |
| 2             | 13            | 0           | -0.093903               | 2.112290  | -0.390049 |
| 3             | 13            | 0           | 2.214829                | 1.817451  | -1.642431 |
| 4             | 13            | 0           | 2.680940                | -0.875175 | -2.116590 |
| 5             | 13            | 0           | 0.576192                | -2.447854 | -1.288735 |
| 6             | 13            | 0           | 0.145108                | 0.083087  | -2.420089 |
| 7             | 13            | 0           | 1.185227                | -0.096857 | 0.020251  |
| 8             | 13            | 0           | 2.741901                | -2.240006 | 0.281720  |
| 9             | 13            | 0           | 0.438617                | -2.084403 | 1.695570  |
| 10            | 13            | 0           | 0.099655                | 0.567584  | 2.369046  |
| 11            | 13            | 0           | 2.116836                | 2.109052  | 1.228314  |
| 12            | 13            | 0           | 3.852840                | 0.405434  | -0.004791 |
| 13            | 13            | 0           | 2.665857                | -0.441351 | 2.299229  |
| 14            | 53            | 0           | -3.745653               | -0.590988 | 0.021571  |
| 15            | 6             | 0           | -1.744412               | 3.163588  | -0.243096 |
| 16            | 6             | 0           | -1.761550               | 4.426267  | 0.186543  |
| 17            | 1             | 0           | -0.866663               | 4.949203  | 0.514579  |
| 18            | 1             | 0           | -2.682469               | 5.005135  | 0.233465  |
| 19            | 1             | 0           | -2.688462               | 2.714536  | -0.547952 |



|    |    |   |           |           |           |
|----|----|---|-----------|-----------|-----------|
| 12 | 13 | 0 | -3.745261 | 0.723435  | 1.838776  |
| 13 | 13 | 0 | -1.003423 | 0.876084  | 2.565206  |
| 14 | 53 | 0 | 3.563645  | -0.143206 | -0.026972 |
| 15 | 6  | 0 | 5.894122  | -0.232442 | -0.204609 |
| 16 | 6  | 0 | 6.646437  | 0.732972  | 0.244943  |
| 17 | 1  | 0 | 6.244373  | 1.613191  | 0.715891  |
| 18 | 1  | 0 | 7.721857  | 0.675116  | 0.156267  |
| 19 | 1  | 0 | 6.196944  | -1.142266 | -0.686568 |

-----

Low frequencies (cm<sup>-1</sup>): -229.6669            15.4837            18.5409  
                                         22.0685            31.5174            43.3793

Optimized geometry after C-I dissociation

-----

| Center | Atomic | Atomic | Coordinates (Angstroms) |           |           |
|--------|--------|--------|-------------------------|-----------|-----------|
| Number | Number | Type   | X                       | Y         | Z         |
| 1      | 13     | 0      | 1.536382                | -0.898626 | 0.911613  |
| 2      | 13     | 0      | -0.083358               | 2.293575  | -0.471307 |
| 3      | 13     | 0      | -1.931788               | 1.874252  | 1.606119  |
| 4      | 13     | 0      | -2.006610               | -1.163960 | 2.325948  |
| 5      | 13     | 0      | -0.249914               | -2.721841 | 0.559586  |
| 6      | 13     | 0      | 0.073760                | 0.449527  | 2.514258  |
| 7      | 13     | 0      | -0.924899               | -0.128141 | -0.024701 |
| 8      | 13     | 0      | -2.794887               | -2.441175 | 0.014399  |
| 9      | 13     | 0      | -0.721662               | -1.929058 | -2.032453 |
| 10     | 13     | 0      | -0.703858               | 0.660505  | -2.620610 |
| 11     | 13     | 0      | -2.623512               | 1.914382  | -1.081193 |
| 12     | 13     | 0      | -3.574726               | 0.124148  | 0.754445  |
| 13     | 13     | 0      | -3.117022               | -0.532700 | -1.783889 |
| 14     | 53     | 0      | 3.791299                | -0.577737 | -0.171093 |
| 15     | 6      | 0      | 1.361554                | 3.602975  | -0.422020 |
| 16     | 6      | 0      | 1.406405                | 4.636646  | 0.406882  |
| 17     | 1      | 0      | 0.637080                | 4.827996  | 1.138186  |
| 18     | 1      | 0      | 2.219734                | 5.346587  | 0.398164  |
| 19     | 1      | 0      | 2.183801                | 3.496212  | -1.116353 |

-----

Low frequencies (cm<sup>-1</sup>): 18.3470            24.8539            30.8830  
                                         39.5252            57.1992            63.9233

Al<sub>13</sub> .... C<sub>6</sub>H<sub>5</sub>I (M062X/TZVP, LANL2DZ level of theory)

Optimized geometry of reactant

-----

| Center | Atomic | Atomic | Coordinates (Angstroms) |           |          |
|--------|--------|--------|-------------------------|-----------|----------|
| Number | Number | Type   | X                       | Y         | Z        |
| 1      | 13     | 0      | 0.073925                | -1.858015 | 0.305521 |
| 2      | 13     | 0      | -0.186814               | 0.785670  | 0.989036 |

|    |    |   |           |           |           |
|----|----|---|-----------|-----------|-----------|
| 3  | 13 | 0 | 1.473117  | 2.327069  | -0.826546 |
| 4  | 13 | 0 | 2.721219  | 0.552066  | -2.509342 |
| 5  | 13 | 0 | 2.010445  | -2.118294 | -1.758634 |
| 6  | 13 | 0 | 0.157622  | -0.091548 | -1.790901 |
| 7  | 13 | 0 | 2.091458  | -0.107494 | 0.013805  |
| 8  | 13 | 0 | 4.385705  | -0.986226 | -0.963844 |
| 9  | 13 | 0 | 2.686998  | -2.539160 | 0.867414  |
| 10 | 13 | 0 | 1.432662  | -0.762657 | 2.539806  |
| 11 | 13 | 0 | 2.175549  | 1.891010  | 1.804870  |
| 12 | 13 | 0 | 4.090314  | 1.660582  | -0.263654 |
| 13 | 13 | 0 | 4.012262  | -0.153118 | 1.824916  |
| 14 | 6  | 0 | -3.626817 | 0.736673  | -0.049801 |
| 15 | 6  | 0 | -3.230126 | 1.306893  | -1.251758 |
| 16 | 6  | 0 | -2.807729 | 2.631630  | -1.270898 |
| 17 | 6  | 0 | -2.779199 | 3.377302  | -0.099330 |
| 18 | 6  | 0 | -3.185072 | 2.797468  | 1.095802  |
| 19 | 6  | 0 | -3.605611 | 1.471848  | 1.128377  |
| 20 | 1  | 0 | -3.248823 | 0.726899  | -2.165502 |
| 21 | 1  | 0 | -2.488130 | 3.073034  | -2.206856 |
| 22 | 1  | 0 | -2.439751 | 4.404707  | -0.117197 |
| 23 | 1  | 0 | -3.165243 | 3.370353  | 2.014220  |
| 24 | 1  | 0 | -3.913159 | 1.019485  | 2.062149  |
| 25 | 53 | 0 | -4.187841 | -1.289130 | 0.001453  |

-----  
Low frequencies (cm<sup>-1</sup>): 13.0640                    8.2120                    18.8566  
                                         25.8991                    54.3493                    65.7507

Coordinate of TS

| Center<br>Number | Atomic<br>Number | Atomic<br>Type | Coordinates (Angstroms) |           |           |
|------------------|------------------|----------------|-------------------------|-----------|-----------|
|                  |                  |                | X                       | Y         | Z         |
| 1                | 13               | 0              | 0.007848                | 0.517860  | 0.483537  |
| 2                | 13               | 0              | -1.193964               | 1.195625  | -1.899668 |
| 3                | 13               | 0              | -3.990343               | 1.827493  | -1.295230 |
| 4                | 13               | 0              | -4.297836               | 1.539533  | 1.408622  |
| 5                | 13               | 0              | -1.895449               | 0.541160  | 2.555023  |
| 6                | 13               | 0              | -1.854480               | 2.487060  | 0.617775  |
| 7                | 13               | 0              | -2.588818               | 0.013675  | 0.013753  |
| 8                | 13               | 0              | -3.989964               | -1.129432 | 1.937715  |
| 9                | 13               | 0              | -1.198043               | -1.808591 | 1.336136  |
| 10               | 13               | 0              | -0.827127               | -1.478347 | -1.367964 |
| 11               | 13               | 0              | -3.239230               | -0.514527 | -2.535039 |
| 12               | 13               | 0              | -5.193915               | -0.503428 | -0.454795 |
| 13               | 13               | 0              | -3.270864               | -2.468915 | -0.596101 |
| 14               | 6                | 0              | 5.554775                | 0.027748  | 0.007046  |
| 15               | 6                | 0              | 6.113574                | 1.227008  | -0.341259 |
| 16               | 6                | 0              | 7.507521                | 1.288955  | -0.289146 |
| 17               | 6                | 0              | 8.246349                | 0.178644  | 0.101531  |
| 18               | 6                | 0              | 7.610971                | -1.008016 | 0.444665  |
| 19               | 6                | 0              | 6.218112                | -1.101373 | 0.403190  |
| 20               | 1                | 0              | 5.519295                | 2.078708  | -0.641457 |



|    |    |   |          |           |           |
|----|----|---|----------|-----------|-----------|
| 21 | 1  | 0 | 8.007690 | 2.212030  | -0.555147 |
| 22 | 1  | 0 | 9.326338 | 0.238765  | 0.138241  |
| 23 | 1  | 0 | 8.190721 | -1.871475 | 0.747848  |
| 24 | 1  | 0 | 5.702718 | -2.014426 | 0.665743  |
| 25 | 53 | 0 | 2.861582 | -0.135294 | -0.093591 |

-----  
 Low frequencies (cm<sup>-1</sup>): -92.0672                    14.4570                    17.1256  
                                  27.5884                    34.7910                    37.7120

Optimized geometry after C-I dissociation

| -----  |        |        |                         |           |           |  |
|--------|--------|--------|-------------------------|-----------|-----------|--|
| Center | Atomic | Atomic | Coordinates (Angstroms) |           |           |  |
| Number | Number | Type   | X                       | Y         | Z         |  |
| -----  |        |        |                         |           |           |  |
| 1      | 13     | 0      | -0.455621               | -1.342735 | -0.000222 |  |
| 2      | 13     | 0      | -0.221829               | 1.813637  | 0.000027  |  |
| 3      | 13     | 0      | 1.953702                | 2.332601  | -1.439331 |  |
| 4      | 13     | 0      | 3.215420                | -0.030759 | -2.215524 |  |
| 5      | 13     | 0      | 1.624659                | -2.191708 | -1.453388 |  |
| 6      | 13     | 0      | 0.489843                | 0.149912  | -2.357368 |  |
| 7      | 13     | 0      | 1.692478                | 0.088242  | 0.000046  |  |
| 8      | 13     | 0      | 3.770857                | -1.500307 | 0.000093  |  |
| 9      | 13     | 0      | 1.624540                | -2.191772 | 1.453282  |  |
| 10     | 13     | 0      | 0.489726                | 0.149758  | 2.357342  |  |
| 11     | 13     | 0      | 1.953667                | 2.332552  | 1.439470  |  |
| 12     | 13     | 0      | 4.029441                | 1.367688  | -0.000014 |  |
| 13     | 13     | 0      | 3.215336                | -0.030817 | 2.215600  |  |
| 14     | 6      | 0      | -2.172816               | 2.005229  | 0.000073  |  |
| 15     | 6      | 0      | -2.893513               | 2.043363  | -1.199569 |  |
| 16     | 6      | 0      | -4.281032               | 2.101329  | -1.201765 |  |
| 17     | 6      | 0      | -4.976443               | 2.124331  | 0.000025  |  |
| 18     | 6      | 0      | -4.281090               | 2.100887  | 1.201840  |  |
| 19     | 6      | 0      | -2.893577               | 2.042916  | 1.199712  |  |
| 20     | 1      | 0      | -2.371092               | 2.016495  | -2.150041 |  |
| 21     | 1      | 0      | -4.819424               | 2.121494  | -2.141246 |  |
| 22     | 1      | 0      | -6.058717               | 2.160494  | 0.000002  |  |
| 23     | 1      | 0      | -4.819541               | 2.120721  | 2.141294  |  |
| 24     | 1      | 0      | -2.371211               | 2.015752  | 2.150205  |  |
| 25     | 53     | 0      | -2.915812               | -1.834813 | -0.000043 |  |

-----  
 Low frequencies (cm<sup>-1</sup>): 10.1940                    26.1932                    28.6083  
                                  40.0863                    53.0415                    65.2469

Al<sub>13</sub> .... C<sub>6</sub>H<sub>5</sub>I (B3PW91/TZVP, LANL2DZ level of theory)

Optimized geometry of reactant

| -----  |        |        |                         |   |   |  |
|--------|--------|--------|-------------------------|---|---|--|
| Center | Atomic | Atomic | Coordinates (Angstroms) |   |   |  |
| Number | Number | Type   | X                       | Y | Z |  |
| -----  |        |        |                         |   |   |  |

|    |    |   |           |           |           |
|----|----|---|-----------|-----------|-----------|
| 1  | 13 | 0 | -0.132381 | -0.426754 | -0.083464 |
| 2  | 13 | 0 | 0.988536  | 1.001730  | 1.971710  |
| 3  | 13 | 0 | 3.295710  | 2.499616  | 0.859496  |
| 4  | 13 | 0 | 3.391345  | 1.910636  | -1.821292 |
| 5  | 13 | 0 | 1.411974  | -0.061274 | -2.461002 |
| 6  | 13 | 0 | 0.852580  | 2.034702  | -0.772713 |
| 7  | 13 | 0 | 2.527972  | 0.119393  | -0.005437 |
| 8  | 13 | 0 | 4.036274  | -0.759427 | -1.995752 |
| 9  | 13 | 0 | 1.747826  | -2.266169 | -0.869415 |
| 10 | 13 | 0 | 1.611847  | -1.669236 | 1.802822  |
| 11 | 13 | 0 | 3.598709  | 0.286878  | 2.460038  |
| 12 | 13 | 0 | 5.192236  | 0.653272  | 0.071771  |
| 13 | 13 | 0 | 4.162975  | -1.811926 | 0.771453  |
| 14 | 6  | 0 | -4.819707 | 0.275941  | 0.029093  |
| 15 | 6  | 0 | -5.345149 | 0.793339  | -1.145597 |
| 16 | 6  | 0 | -6.085860 | 1.968508  | -1.090976 |
| 17 | 6  | 0 | -6.293974 | 2.613200  | 0.121233  |
| 18 | 6  | 0 | -5.759446 | 2.080454  | 1.286889  |
| 19 | 6  | 0 | -5.017079 | 0.905581  | 1.249041  |
| 20 | 1  | 0 | -5.183086 | 0.292798  | -2.091790 |
| 21 | 1  | 0 | -6.499328 | 2.377668  | -2.005958 |
| 22 | 1  | 0 | -6.872187 | 3.529193  | 0.157564  |
| 23 | 1  | 0 | -5.916886 | 2.577643  | 2.237467  |
| 24 | 1  | 0 | -4.601464 | 0.491997  | 2.159137  |
| 25 | 53 | 0 | -3.696464 | -1.523399 | -0.041912 |

-----  
Low frequencies (cm<sup>-1</sup>): 4.7536                      7.8612                      12.7524  
                                         15.8931                      21.0195                      24.5753

Coordinate of TS

-----

| Center<br>Number | Atomic<br>Number | Atomic<br>Type | Coordinates (Angstroms) |           |           |
|------------------|------------------|----------------|-------------------------|-----------|-----------|
|                  |                  |                | X                       | Y         | Z         |
| 1                | 13               | 0              | 0.110329                | -0.075907 | 0.007227  |
| 2                | 13               | 0              | -1.281938               | 1.069346  | 2.080610  |
| 3                | 13               | 0              | -3.822314               | -0.380190 | 2.334925  |
| 4                | 13               | 0              | -3.819055               | -2.349882 | 0.419799  |
| 5                | 13               | 0              | -1.489583               | -2.114279 | -1.214815 |
| 6                | 13               | 0              | -1.390362               | -1.809293 | 1.523487  |
| 7                | 13               | 0              | -2.595955               | 0.023428  | 0.012605  |
| 8                | 13               | 0              | -3.874036               | -1.100030 | -2.033793 |
| 9                | 13               | 0              | -1.387163               | 0.429357  | -2.309511 |
| 10               | 13               | 0              | -1.322044               | 2.379145  | -0.343192 |
| 11               | 13               | 0              | -3.650732               | 2.154110  | 1.294124  |
| 12               | 13               | 0              | -5.267414               | 0.124986  | -0.022408 |
| 13               | 13               | 0              | -3.763822               | 1.918585  | -1.445287 |
| 14               | 6                | 0              | 5.818444                | 0.009519  | 0.036954  |
| 15               | 6                | 0              | 6.494696                | -1.153437 | 0.297588  |
| 16               | 6                | 0              | 7.887006                | -1.062602 | 0.377954  |
| 17               | 6                | 0              | 8.519198                | 0.163221  | 0.198776  |
| 18               | 6                | 0              | 7.778060                | 1.310911  | -0.062172 |

-----

|    |    |   |          |           |           |
|----|----|---|----------|-----------|-----------|
| 19 | 6  | 0 | 6.384706 | 1.243646  | -0.146714 |
| 20 | 1  | 0 | 5.985256 | -2.100589 | 0.435143  |
| 21 | 1  | 0 | 8.472118 | -1.953632 | 0.581448  |
| 22 | 1  | 0 | 9.599794 | 0.224612  | 0.262615  |
| 23 | 1  | 0 | 8.278845 | 2.263665  | -0.200636 |
| 24 | 1  | 0 | 5.791075 | 2.128178  | -0.348571 |
| 25 | 53 | 0 | 2.656290 | -0.134560 | -0.167799 |

-----  
 Low frequencies (cm<sup>-1</sup>): -19.7412                      7.3825                      9.0180  
                                          14.2057                      34.2019                      37.4253

Optimized geometry after C-I dissociation

| -----  |        |        |                         |           |           |  |
|--------|--------|--------|-------------------------|-----------|-----------|--|
| Center | Atomic | Atomic | Coordinates (Angstroms) |           |           |  |
| Number | Number | Type   | X                       | Y         | Z         |  |
| -----  |        |        |                         |           |           |  |
| 1      | 13     | 0      | -0.269483               | -1.638162 | -0.074042 |  |
| 2      | 13     | 0      | -0.457745               | 1.707704  | -0.197752 |  |
| 3      | 13     | 0      | 1.720179                | 2.394933  | -1.548439 |  |
| 4      | 13     | 0      | 3.222783                | 0.152556  | -2.184709 |  |
| 5      | 13     | 0      | 1.936468                | -2.174508 | -1.416058 |  |
| 6      | 13     | 0      | 0.498521                | 0.011015  | -2.398788 |  |
| 7      | 13     | 0      | 1.607484                | 0.156478  | 0.008462  |  |
| 8      | 13     | 0      | 3.913488                | -1.177821 | 0.108505  |  |
| 9      | 13     | 0      | 1.819036                | -2.053212 | 1.573266  |  |
| 10     | 13     | 0      | 0.422409                | 0.190313  | 2.393609  |  |
| 11     | 13     | 0      | 1.620296                | 2.488355  | 1.355428  |  |
| 12     | 13     | 0      | 3.836966                | 1.695308  | -0.007788 |  |
| 13     | 13     | 0      | 3.169901                | 0.324163  | 2.246226  |  |
| 14     | 6      | 0      | -2.393827               | 2.046677  | -0.099289 |  |
| 15     | 6      | 0      | -3.205118               | 1.948832  | -1.237284 |  |
| 16     | 6      | 0      | -4.563581               | 2.233766  | -1.177401 |  |
| 17     | 6      | 0      | -5.139883               | 2.624945  | 0.024567  |  |
| 18     | 6      | 0      | -4.353476               | 2.731344  | 1.164885  |  |
| 19     | 6      | 0      | -2.995299               | 2.445748  | 1.101947  |  |
| 20     | 1      | 0      | -2.777579               | 1.644046  | -2.187387 |  |
| 21     | 1      | 0      | -5.173038               | 2.148372  | -2.070685 |  |
| 22     | 1      | 0      | -6.200565               | 2.846183  | 0.072749  |  |
| 23     | 1      | 0      | -4.798397               | 3.035837  | 2.106234  |  |
| 24     | 1      | 0      | -2.400770               | 2.536499  | 2.005730  |  |
| 25     | 53     | 0      | -2.684273               | -2.328328 | 0.061431  |  |

-----  
 Low frequencies (cm<sup>-1</sup>): 10.4574                      22.9571                      24.3979  
                                          28.3258                      36.3789                      40.6392

Al<sub>13</sub> .... C<sub>6</sub>H<sub>5</sub>I (BHandHLYP/TZVP, LANL2DZ level of theory)

Optimized geometry of reactant

| -----  |        |        |                         |   |   |  |
|--------|--------|--------|-------------------------|---|---|--|
| Center | Atomic | Atomic | Coordinates (Angstroms) |   |   |  |
| Number | Number | Type   | X                       | Y | Z |  |

|    |    |   |           |           |           |
|----|----|---|-----------|-----------|-----------|
| 1  | 13 | 0 | 0.085677  | -1.064521 | 0.080725  |
| 2  | 13 | 0 | -0.572693 | 1.580250  | -0.346391 |
| 3  | 13 | 0 | -2.994332 | 2.652485  | -0.389972 |
| 4  | 13 | 0 | -2.902850 | 1.747145  | 2.047426  |
| 5  | 13 | 0 | -1.967711 | -2.127471 | 1.725176  |
| 6  | 13 | 0 | -0.761916 | 0.278174  | 2.168778  |
| 7  | 13 | 0 | -2.518555 | -0.113403 | 0.042415  |
| 8  | 13 | 0 | -4.169979 | -0.736892 | 2.082436  |
| 9  | 13 | 0 | -2.082755 | -2.595301 | -0.885079 |
| 10 | 13 | 0 | -0.979577 | -0.496074 | -2.245375 |
| 11 | 13 | 0 | -3.069382 | 1.026157  | -2.414062 |
| 12 | 13 | 0 | -4.995009 | 0.814075  | -0.041012 |
| 13 | 13 | 0 | -4.273991 | -1.346477 | -1.595270 |
| 14 | 6  | 0 | 4.331317  | 0.615401  | -0.040965 |
| 15 | 6  | 0 | 4.630508  | 1.305072  | 1.116102  |
| 16 | 6  | 0 | 4.658626  | 2.687043  | 1.090733  |
| 17 | 6  | 0 | 4.389784  | 3.370112  | -0.079073 |
| 18 | 6  | 0 | 4.091814  | 2.667029  | -1.229725 |
| 19 | 6  | 0 | 4.060537  | 1.284833  | -1.216750 |
| 20 | 1  | 0 | 4.839681  | 0.778008  | 2.027876  |
| 21 | 1  | 0 | 4.890891  | 3.226336  | 1.991586  |
| 22 | 1  | 0 | 4.411550  | 4.444757  | -0.093669 |
| 23 | 1  | 0 | 3.880163  | 3.190628  | -2.144784 |
| 24 | 1  | 0 | 3.826540  | 0.742594  | -2.113420 |
| 25 | 53 | 0 | 4.279540  | -1.490475 | -0.009375 |

Low frequencies (cm<sup>-1</sup>): 11.1432      10.7630      5.3060  
6.0031      11.4991      12.3749

Coordinate of TS

| Center Number | Atomic Number | Atomic Type | Coordinates (Angstroms) |           |           |
|---------------|---------------|-------------|-------------------------|-----------|-----------|
|               |               |             | X                       | Y         | Z         |
| 1             | 13            | 0           | 0.028262                | 0.212484  | -0.017085 |
| 2             | 13            | 0           | -1.249209               | 2.187441  | 1.086047  |
| 3             | 13            | 0           | -4.566370               | 0.170210  | 1.994242  |
| 4             | 13            | 0           | -3.549806               | -2.140287 | 1.254908  |
| 5             | 13            | 0           | -1.121929               | -2.071226 | 0.342603  |
| 6             | 13            | 0           | -1.801984               | -0.152745 | 2.296667  |
| 7             | 13            | 0           | -2.763415               | 0.127758  | -0.115299 |
| 8             | 13            | 0           | -3.273440               | -2.121932 | -1.507357 |
| 9             | 13            | 0           | -1.329049               | -0.611782 | -2.289633 |
| 10            | 13            | 0           | -1.623250               | 2.000128  | -1.610141 |
| 11            | 13            | 0           | -3.854987               | 2.464312  | 0.862846  |
| 12            | 13            | 0           | -5.292135               | -0.627109 | -0.522488 |
| 13            | 13            | 0           | -4.322212               | 1.581228  | -1.747558 |
| 14            | 6             | 0           | 5.715264                | 0.060040  | 0.046023  |
| 15            | 6             | 0           | 6.258568                | 0.066080  | 1.292216  |
| 16            | 6             | 0           | 7.612977                | 0.370233  | 1.354850  |

|    |    |   |          |           |           |
|----|----|---|----------|-----------|-----------|
| 17 | 6  | 0 | 8.322316 | 0.646018  | 0.200754  |
| 18 | 6  | 0 | 7.697772 | 0.623179  | -1.032328 |
| 19 | 6  | 0 | 6.344508 | 0.322744  | -1.130030 |
| 20 | 1  | 0 | 5.687725 | -0.150730 | 2.173859  |
| 21 | 1  | 0 | 8.103528 | 0.389612  | 2.311934  |
| 22 | 1  | 0 | 9.369447 | 0.880589  | 0.262775  |
| 23 | 1  | 0 | 8.254066 | 0.838786  | -1.927361 |
| 24 | 1  | 0 | 5.838693 | 0.299554  | -2.075362 |
| 25 | 53 | 0 | 3.063998 | -0.528827 | -0.103689 |

-----

Low frequencies (cm<sup>-1</sup>): -90.5478                    12.0381                    14.1176  
                                         14.9870                    22.5686                    31.5373

Optimized geometry after C-I dissociation

| Center<br>Number | Atomic<br>Number | Atomic<br>Type | Coordinates (Angstroms) |           |           |
|------------------|------------------|----------------|-------------------------|-----------|-----------|
|                  |                  |                | X                       | Y         | Z         |
| 1                | 13               | 0              | -0.268640               | 1.892284  | 0.921479  |
| 2                | 13               | 0              | -0.674079               | -1.786604 | -0.387809 |
| 3                | 13               | 0              | 1.210912                | -2.271880 | 1.716069  |
| 4                | 13               | 0              | 2.930614                | 0.296362  | 2.226638  |
| 5                | 13               | 0              | 2.194321                | 2.437729  | 0.404427  |
| 6                | 13               | 0              | 0.323192                | 0.036368  | 2.572515  |
| 7                | 13               | 0              | 1.322295                | -0.136537 | -0.025677 |
| 8                | 13               | 0              | 4.164122                | 0.822509  | -0.189700 |
| 9                | 13               | 0              | 2.029958                | 1.409402  | -2.135782 |
| 10               | 13               | 0              | 0.623645                | -0.797415 | -2.566903 |
| 11               | 13               | 0              | 1.676541                | -2.827342 | -0.951841 |
| 12               | 13               | 0              | 3.492731                | -1.701733 | 0.729769  |
| 13               | 13               | 0              | 3.319463                | -1.040970 | -1.850918 |
| 14               | 6                | 0              | -2.575794               | -2.196404 | -0.181577 |
| 15               | 6                | 0              | -3.041208               | -3.041862 | 0.824734  |
| 16               | 6                | 0              | -4.385917               | -3.330843 | 0.957733  |
| 17               | 6                | 0              | -5.301112               | -2.774257 | 0.084604  |
| 18               | 6                | 0              | -4.866174               | -1.931171 | -0.919677 |
| 19               | 6                | 0              | -3.519522               | -1.649581 | -1.050093 |
| 20               | 1                | 0              | -2.349451               | -3.484704 | 1.521560  |
| 21               | 1                | 0              | -4.719428               | -3.987064 | 1.742413  |
| 22               | 1                | 0              | -6.348753               | -2.995523 | 0.187553  |
| 23               | 1                | 0              | -5.574308               | -1.492080 | -1.600096 |
| 24               | 1                | 0              | -3.208618               | -0.988133 | -1.841167 |
| 25               | 53               | 0              | -2.380133               | 2.833471  | -0.081398 |

-----

Low frequencies (cm<sup>-1</sup>): 10.2242                    16.6103                    24.5625  
                                         34.0611                    40.9072                    49.9249

Al<sub>20</sub> .... C<sub>2</sub>H<sub>5</sub>I (M062X/TZVP, LANL2DZ level of theory)

Optimized geometry of reactant

| Center Number | Atomic Number | Atomic Type | Coordinates (Angstroms) |           |           |
|---------------|---------------|-------------|-------------------------|-----------|-----------|
|               |               |             | X                       | Y         | Z         |
| 1             | 13            | 0           | -0.841907               | -2.377117 | 1.344702  |
| 2             | 13            | 0           | -1.100214               | 0.261240  | 2.451478  |
| 3             | 13            | 0           | -1.344387               | 2.119814  | 0.229828  |
| 4             | 13            | 0           | -1.251637               | 0.547692  | -2.208899 |
| 5             | 13            | 0           | -0.930444               | -2.186757 | -1.482035 |
| 6             | 13            | 0           | -2.361059               | -0.439469 | 0.117233  |
| 7             | 13            | 0           | 0.099304                | -0.176967 | 0.039999  |
| 8             | 13            | 0           | 1.448788                | -2.489023 | -0.166124 |
| 9             | 13            | 0           | 1.350449                | -1.035092 | 2.248046  |
| 10            | 13            | 0           | 1.054147                | 1.765591  | 1.609650  |
| 11            | 13            | 0           | 0.956381                | 1.944183  | -1.342950 |
| 12            | 13            | 0           | 1.212096                | -0.726942 | -2.338789 |
| 13            | 13            | 0           | 3.862714                | -1.885598 | -1.560688 |
| 14            | 13            | 0           | 3.949323                | -2.118963 | 1.065116  |
| 15            | 13            | 0           | 3.850868                | 0.032592  | 2.534884  |
| 16            | 13            | 0           | 3.705777                | 2.349665  | 1.438519  |
| 17            | 13            | 0           | 3.593185                | 2.578778  | -1.110933 |
| 18            | 13            | 0           | 3.658789                | 0.496456  | -2.622665 |
| 19            | 13            | 0           | 2.617618                | 0.129015  | -0.013963 |
| 20            | 13            | 0           | 5.133547                | 0.282900  | -0.091106 |
| 21            | 6             | 0           | -5.318311               | 1.609836  | -0.695857 |
| 22            | 6             | 0           | -5.413934               | 2.567020  | 0.463862  |
| 23            | 1             | 0           | -6.166062               | 1.649222  | -1.372122 |
| 24            | 1             | 0           | -5.392866               | 3.586448  | 0.069461  |
| 25            | 1             | 0           | -6.339056               | 2.433256  | 1.023071  |
| 26            | 1             | 0           | -4.568439               | 2.454841  | 1.143332  |
| 27            | 1             | 0           | -4.383914               | 1.695954  | -1.246827 |
| 28            | 53            | 0           | -5.309048               | -0.468242 | -0.001168 |

Low frequencies (cm<sup>-1</sup>): 21.3762                      2.7087                      24.2025  
 27.8186                      54.4685                      59.6277

Coordinate of TS

| Center Number | Atomic Number | Atomic Type | Coordinates (Angstroms) |           |           |
|---------------|---------------|-------------|-------------------------|-----------|-----------|
|               |               |             | X                       | Y         | Z         |
| 1             | 13            | 0           | -1.174111               | -0.816360 | -2.341204 |
| 2             | 13            | 0           | -0.848023               | -2.823541 | -0.348165 |
| 3             | 13            | 0           | -0.943980               | -1.621066 | 2.212127  |
| 4             | 13            | 0           | -1.359284               | 1.173864  | 1.909082  |
| 5             | 13            | 0           | -1.446687               | 1.665669  | -1.015373 |
| 6             | 13            | 0           | -2.465470               | -0.621550 | 0.113395  |
| 7             | 13            | 0           | 0.005336                | -0.272913 | 0.056387  |
| 8             | 13            | 0           | 0.937693                | 0.965987  | -2.145547 |
| 9             | 13            | 0           | 1.291875                | -1.804005 | -1.711465 |
| 10            | 13            | 0           | 1.444089                | -2.305563 | 1.035868  |

|    |    |   |           |           |           |
|----|----|---|-----------|-----------|-----------|
| 11 | 13 | 0 | 1.156592  | 0.126052  | 2.435520  |
| 12 | 13 | 0 | 0.771865  | 2.248395  | 0.519612  |
| 13 | 13 | 0 | 3.404705  | 2.850252  | 0.282305  |
| 14 | 13 | 0 | 3.513718  | 1.868651  | -2.079269 |
| 15 | 13 | 0 | 3.693309  | -0.657738 | -2.477878 |
| 16 | 13 | 0 | 3.869638  | -2.256579 | -0.431807 |
| 17 | 13 | 0 | 3.799615  | -1.242880 | 2.046164  |
| 18 | 13 | 0 | 3.640351  | 1.320513  | 2.328425  |
| 19 | 13 | 0 | 2.541955  | 0.167310  | -0.026140 |
| 20 | 13 | 0 | 5.097396  | 0.385700  | -0.070330 |
| 21 | 6  | 0 | -5.406466 | 2.310095  | 0.273151  |
| 22 | 6  | 0 | -4.317981 | 3.098931  | -0.186135 |
| 23 | 1  | 0 | -5.515162 | 2.088366  | 1.325755  |
| 24 | 1  | 0 | -4.513048 | 3.655102  | -1.099200 |
| 25 | 1  | 0 | -3.845451 | 3.698808  | 0.588893  |
| 26 | 1  | 0 | -3.391860 | 2.415522  | -0.497215 |
| 27 | 1  | 0 | -6.277974 | 2.153610  | -0.346245 |
| 28 | 53 | 0 | -5.060516 | -0.472040 | -0.080873 |

-----  
 Low frequencies (cm<sup>-1</sup>): -216.6753                      20.1148                      22.3046  
                                          37.9909                      40.9230                      73.0395

Optimized geometry after C-I dissociation

-----

| Center<br>Number | Atomic<br>Number | Atomic<br>Type | Coordinates (Angstroms) |           |           |
|------------------|------------------|----------------|-------------------------|-----------|-----------|
|                  |                  |                | X                       | Y         | Z         |
| 1                | 13               | 0              | 1.395466                | 0.410538  | 2.343291  |
| 2                | 13               | 0              | 1.295924                | -2.260435 | 1.424605  |
| 3                | 13               | 0              | 1.295816                | -2.261527 | -1.423170 |
| 4                | 13               | 0              | 1.395430                | 0.408781  | -2.343846 |
| 5                | 13               | 0              | 1.398402                | 2.059441  | -0.000804 |
| 6                | 13               | 0              | 2.738521                | -0.347111 | -0.000037 |
| 7                | 13               | 0              | 0.193036                | -0.243328 | -0.000014 |
| 8                | 13               | 0              | -0.928772               | 1.688364  | 1.502515  |
| 9                | 13               | 0              | -0.937687               | -1.012555 | 2.294864  |
| 10               | 13               | 0              | -1.072298               | -2.595936 | 0.000990  |
| 11               | 13               | 0              | -0.937852               | -1.014260 | -2.294211 |
| 12               | 13               | 0              | -0.928694               | 1.687314  | -1.503895 |
| 13               | 13               | 0              | -3.639613               | 2.124203  | -1.286751 |
| 14               | 13               | 0              | -3.639790               | 2.125351  | 1.284232  |
| 15               | 13               | 0              | -3.489602               | -0.023085 | 2.639675  |
| 16               | 13               | 0              | -3.426249               | -2.264711 | 1.365744  |
| 17               | 13               | 0              | -3.426155               | -2.266332 | -1.363354 |
| 18               | 13               | 0              | -3.490291               | -0.026095 | -2.639551 |
| 19               | 13               | 0              | -2.393845               | -0.076903 | -0.000077 |
| 20               | 13               | 0              | -4.990267               | -0.230435 | 0.000184  |
| 21               | 6                | 0              | 2.165185                | 3.887076  | -0.001492 |
| 22               | 6                | 0              | 1.116743                | 5.001157  | 0.000690  |
| 23               | 1                | 0              | 2.811199                | 3.960009  | -0.879588 |
| 24               | 1                | 0              | 1.585681                | 5.988328  | -0.000071 |
| 25               | 1                | 0              | 0.468947                | 4.943276  | -0.876837 |

-----

|    |    |   |          |           |          |
|----|----|---|----------|-----------|----------|
| 26 | 1  | 0 | 0.472357 | 4.943010  | 0.880705 |
| 27 | 1  | 0 | 2.814238 | 3.959461  | 0.874403 |
| 28 | 53 | 0 | 5.260505 | -0.444908 | 0.000021 |

-----  
 Low frequencies (cm<sup>-1</sup>): -16.1165                    22.9539                    27.8923  
                                  32.1388                    44.1319                    47.3750

Al<sub>20</sub> .... C<sub>2</sub>H<sub>5</sub>I (B3PW91/TZVP, LANL2DZ level of theory)

Optimized geometry of reactant

| Center<br>Number | Atomic<br>Number | Atomic<br>Type | Coordinates (Angstroms) |           |           |
|------------------|------------------|----------------|-------------------------|-----------|-----------|
|                  |                  |                | X                       | Y         | Z         |
| 1                | 13               | 0              | 1.289706                | 1.528162  | -1.616878 |
| 2                | 13               | 0              | 1.270504                | 1.806286  | 1.340980  |
| 3                | 13               | 0              | 0.987224                | -0.838091 | 2.427616  |
| 4                | 13               | 0              | 0.849334                | -2.692822 | 0.268533  |
| 5                | 13               | 0              | 1.004970                | -1.289732 | -2.201256 |
| 6                | 13               | 0              | 2.344202                | -0.380231 | 0.055844  |
| 7                | 13               | 0              | -0.137437               | -0.135195 | 0.017563  |
| 8                | 13               | 0              | -1.142614               | 0.423603  | -2.428721 |
| 9                | 13               | 0              | -0.915062               | 2.434377  | -0.218804 |
| 10               | 13               | 0              | -1.176731               | 0.865728  | 2.305604  |
| 11               | 13               | 0              | -1.423666               | -1.910691 | 1.610098  |
| 12               | 13               | 0              | -1.420440               | -2.179383 | -1.211591 |
| 13               | 13               | 0              | -3.910039               | -1.321991 | -2.136303 |
| 14               | 13               | 0              | -3.766813               | 1.256798  | -2.403476 |
| 15               | 13               | 0              | -3.624221               | 2.799849  | -0.318374 |
| 16               | 13               | 0              | -3.776393               | 1.757220  | 2.056870  |
| 17               | 13               | 0              | -3.887839               | -0.817604 | 2.369805  |
| 18               | 13               | 0              | -3.961526               | -2.373507 | 0.259704  |
| 19               | 13               | 0              | -2.647527               | 0.156220  | -0.024368 |
| 20               | 13               | 0              | -5.166425               | 0.268041  | -0.029886 |
| 21               | 6                | 0              | 5.575688                | 1.553800  | -0.705271 |
| 22               | 6                | 0              | 5.802580                | 2.515701  | 0.426460  |
| 23               | 1                | 0              | 4.648287                | 1.732840  | -1.246806 |
| 24               | 1                | 0              | 5.913077                | 3.519492  | 0.001507  |
| 25               | 1                | 0              | 4.956400                | 2.538499  | 1.114255  |
| 26               | 1                | 0              | 6.708872                | 2.286489  | 0.988215  |
| 27               | 1                | 0              | 6.409839                | 1.477534  | -1.397285 |
| 28               | 53               | 0              | 5.336495                | -0.521006 | 0.011595  |

-----  
 Low frequencies (cm<sup>-1</sup>): 13.2547                    17.4251                    25.0723  
                                  27.2592                    44.6939                    55.3893

Coordinate of TS

| Center<br>Number | Atomic<br>Number | Atomic<br>Type | Coordinates (Angstroms) |   |   |
|------------------|------------------|----------------|-------------------------|---|---|
|                  |                  |                | X                       | Y | Z |



|    |    |   |           |           |           |
|----|----|---|-----------|-----------|-----------|
| 1  | 13 | 0 | -1.241510 | 0.257347  | -2.366523 |
| 2  | 13 | 0 | -0.882116 | -2.399773 | -1.414625 |
| 3  | 13 | 0 | -0.882185 | -2.398757 | 1.416226  |
| 4  | 13 | 0 | -1.241668 | 0.259111  | 2.366165  |
| 5  | 13 | 0 | -1.434633 | 1.958854  | -0.000954 |
| 6  | 13 | 0 | -2.446486 | -0.575246 | 0.000106  |
| 7  | 13 | 0 | 0.054584  | -0.245651 | 0.000053  |
| 8  | 13 | 0 | 0.846404  | 1.849658  | -1.527888 |
| 9  | 13 | 0 | 1.261493  | -0.904646 | -2.316749 |
| 10 | 13 | 0 | 1.470114  | -2.552210 | 0.000909  |
| 11 | 13 | 0 | 1.261350  | -0.902925 | 2.317403  |
| 12 | 13 | 0 | 0.846192  | 1.850862  | 1.526421  |
| 13 | 13 | 0 | 3.486069  | 2.534868  | 1.295455  |
| 14 | 13 | 0 | 3.486195  | 2.534069  | -1.296816 |
| 15 | 13 | 0 | 3.761544  | 0.318605  | -2.610255 |
| 16 | 13 | 0 | 3.884383  | -1.927709 | -1.333112 |
| 17 | 13 | 0 | 3.884322  | -1.926958 | 1.334382  |
| 18 | 13 | 0 | 3.761589  | 0.320116  | 2.610113  |
| 19 | 13 | 0 | 2.576854  | 0.197967  | -0.000006 |
| 20 | 13 | 0 | 5.129491  | 0.390543  | -0.000065 |
| 21 | 6  | 0 | -5.794504 | 2.142114  | 0.000497  |
| 22 | 6  | 0 | -4.689868 | 3.063052  | -0.000360 |
| 23 | 1  | 0 | -6.330498 | 1.938413  | 0.917301  |
| 24 | 1  | 0 | -4.643165 | 3.672536  | -0.902851 |
| 25 | 1  | 0 | -4.642598 | 3.673307  | 0.901594  |
| 26 | 1  | 0 | -3.656301 | 2.537148  | -0.000364 |
| 27 | 1  | 0 | -6.331874 | 1.938338  | -0.915466 |
| 28 | 53 | 0 | -5.095380 | -0.514837 | -0.000079 |

-----  
 Low frequencies (cm<sup>-1</sup>): -148.0717                      20.8980                      24.2605  
                                          36.3700                      38.0965                      64.3124

-----  
 Optimized geometry after C-I dissociation  
 -----

| Center<br>Number | Atomic<br>Number | Atomic<br>Type | Coordinates (Angstroms) |           |           |
|------------------|------------------|----------------|-------------------------|-----------|-----------|
|                  |                  |                | X                       | Y         | Z         |
| 1                | 13               | 0              | -1.391674               | 0.377294  | -2.367595 |
| 2                | 13               | 0              | -1.252491               | -2.285285 | -1.431948 |
| 3                | 13               | 0              | -1.253327               | -2.287048 | 1.428384  |
| 4                | 13               | 0              | -1.391135               | 0.372850  | 2.369103  |
| 5                | 13               | 0              | -1.420422               | 2.066515  | 0.007307  |
| 6                | 13               | 0              | -2.733652               | -0.395160 | -0.000667 |
| 7                | 13               | 0              | -0.164856               | -0.226301 | -0.000391 |
| 8                | 13               | 0              | 0.896104                | 1.739211  | -1.542673 |
| 9                | 13               | 0              | 0.976119                | -0.994857 | -2.322138 |
| 10               | 13               | 0              | 1.104477                | -2.611996 | -0.001016 |
| 11               | 13               | 0              | 0.975738                | -0.997584 | 2.320871  |
| 12               | 13               | 0              | 0.898576                | 1.736461  | 1.545407  |
| 13               | 13               | 0              | 3.625297                | 2.166369  | 1.296862  |
| 14               | 13               | 0              | 3.622471                | 2.167639  | -1.298102 |
| 15               | 13               | 0              | 3.590798                | -0.013348 | -2.653840 |

|    |    |   |           |           |           |
|----|----|---|-----------|-----------|-----------|
| 16 | 13 | 0 | 3.458323  | -2.232339 | -1.362370 |
| 17 | 13 | 0 | 3.458479  | -2.231274 | 1.361696  |
| 18 | 13 | 0 | 3.588912  | -0.012938 | 2.654413  |
| 19 | 13 | 0 | 2.416925  | -0.014503 | -0.000616 |
| 20 | 13 | 0 | 5.019024  | -0.196681 | 0.000345  |
| 21 | 6  | 0 | -2.384252 | 3.814468  | -0.001247 |
| 22 | 6  | 0 | -1.499436 | 5.059272  | -0.001455 |
| 23 | 1  | 0 | -3.043326 | 3.803448  | 0.872408  |
| 24 | 1  | 0 | -2.103890 | 5.972617  | -0.006803 |
| 25 | 1  | 0 | -0.855552 | 5.101208  | 0.880710  |
| 26 | 1  | 0 | -0.848290 | 5.095657  | -0.878530 |
| 27 | 1  | 0 | -3.036702 | 3.798389  | -0.879750 |
| 28 | 53 | 0 | -5.266378 | -0.503115 | -0.000212 |

-----  
 Low frequencies (cm<sup>-1</sup>): 8.9777                    26.8909                    33.8050  
                                  39.1673                    48.0350                    56.8045

Al<sub>20</sub> .... C<sub>2</sub>H<sub>5</sub>I (BHandHLYP/TZVP, LANL2DZ level of theory)

Optimized geometry of reactant

| Center<br>Number | Atomic<br>Number | Atomic<br>Type | Coordinates (Angstroms) |           |           |
|------------------|------------------|----------------|-------------------------|-----------|-----------|
|                  |                  |                | X                       | Y         | Z         |
| 1                | 13               | 0              | -1.296918               | 1.546194  | 1.649008  |
| 2                | 13               | 0              | -1.265887               | 1.833794  | -1.365074 |
| 3                | 13               | 0              | -1.006369               | -0.819012 | -2.433078 |
| 4                | 13               | 0              | -0.874265               | -2.683909 | -0.285935 |
| 5                | 13               | 0              | -1.002059               | -1.325530 | 2.211345  |
| 6                | 13               | 0              | -2.303635               | -0.342217 | -0.034619 |
| 7                | 13               | 0              | 0.159338                | -0.109954 | -0.004378 |
| 8                | 13               | 0              | 1.117957                | 0.422356  | 2.456442  |
| 9                | 13               | 0              | 0.889281                | 2.469697  | 0.227413  |
| 10               | 13               | 0              | 1.181724                | 0.878450  | -2.296287 |
| 11               | 13               | 0              | 1.409752                | -1.883872 | -1.620779 |
| 12               | 13               | 0              | 1.424385                | -2.181502 | 1.181736  |
| 13               | 13               | 0              | 3.953761                | -1.416026 | 2.070989  |
| 14               | 13               | 0              | 3.762337                | 1.153957  | 2.446782  |
| 15               | 13               | 0              | 3.595017                | 2.783380  | 0.418126  |
| 16               | 13               | 0              | 3.762135                | 1.827959  | -2.004040 |
| 17               | 13               | 0              | 3.859657                | -0.736651 | -2.419192 |
| 18               | 13               | 0              | 3.953855                | -2.375121 | -0.361747 |
| 19               | 13               | 0              | 2.679538                | 0.151661  | 0.035223  |
| 20               | 13               | 0              | 5.217913                | 0.280657  | 0.019135  |
| 21               | 6                | 0              | -5.660234               | 1.503946  | 0.713645  |
| 22               | 6                | 0              | -5.892167               | 2.471199  | -0.410762 |
| 23               | 1                | 0              | -4.772605               | 1.719518  | 1.286715  |
| 24               | 1                | 0              | -6.061036               | 3.455474  | 0.018525  |
| 25               | 1                | 0              | -5.033501               | 2.537127  | -1.066141 |
| 26               | 1                | 0              | -6.761356               | 2.207115  | -0.999328 |
| 27               | 1                | 0              | -6.508230               | 1.386706  | 1.367370  |

28 53 0 -5.308992 -0.534393 -0.019025

-----  
Low frequencies (cm<sup>-1</sup>): 12.1150 14.9334 26.4565  
28.8791 39.0464 51.8567

Coordinate of TS

-----

| Center Number | Atomic Number | Atomic Type | Coordinates (Angstroms) |           |           |
|---------------|---------------|-------------|-------------------------|-----------|-----------|
|               |               |             | X                       | Y         | Z         |
| 1             | 13            | 0           | -1.197416               | -0.280348 | -2.460850 |
| 2             | 13            | 0           | -0.892504               | -2.659562 | -0.906524 |
| 3             | 13            | 0           | -0.935668               | -2.038689 | 1.864480  |
| 4             | 13            | 0           | -1.292781               | 0.764670  | 2.237865  |
| 5             | 13            | 0           | -1.443895               | 1.930779  | -0.565097 |
| 6             | 13            | 0           | -2.425521               | -0.550232 | 0.044241  |
| 7             | 13            | 0           | 0.046512                | -0.210288 | 0.022245  |
| 8             | 13            | 0           | 0.872286                | 1.492096  | -1.923562 |
| 9             | 13            | 0           | 1.283198                | -1.368683 | -2.061816 |
| 10            | 13            | 0           | 1.433205                | -2.481687 | 0.529137  |
| 11            | 13            | 0           | 1.216329                | -0.383243 | 2.433562  |
| 12            | 13            | 0           | 0.762852                | 2.176960  | 1.068938  |
| 13            | 13            | 0           | 3.409198                | 2.739364  | 0.809831  |
| 14            | 13            | 0           | 3.494017                | 2.213374  | -1.735821 |
| 15            | 13            | 0           | 3.788025                | -0.221365 | -2.588335 |
| 16            | 13            | 0           | 3.850602                | -2.168639 | -0.885266 |
| 17            | 13            | 0           | 3.816569                | -1.646480 | 1.747664  |
| 18            | 13            | 0           | 3.743376                | 0.814986  | 2.532131  |
| 19            | 13            | 0           | 2.595560                | 0.201434  | -0.014410 |
| 20            | 13            | 0           | 5.183936                | 0.380220  | -0.028026 |
| 21            | 6             | 0           | -5.732644               | 2.202555  | 0.138097  |
| 22            | 6             | 0           | -4.649644               | 3.097774  | -0.096872 |
| 23            | 1             | 0           | -6.039639               | 1.964118  | 1.137099  |
| 24            | 1             | 0           | -4.752407               | 3.667263  | -1.009991 |
| 25            | 1             | 0           | -4.425033               | 3.725726  | 0.754692  |
| 26            | 1             | 0           | -3.649660               | 2.537772  | -0.251448 |
| 27            | 1             | 0           | -6.423626               | 1.957592  | -0.643830 |
| 28            | 53            | 0           | -5.045629               | -0.543681 | -0.033942 |

-----

Low frequencies (cm<sup>-1</sup>): -184.1381 3.7099 23.0531  
38.9226 43.0699 61.2539

Optimized geometry after C-I dissociation

-----

| Center Number | Atomic Number | Atomic Type | Coordinates (Angstroms) |           |           |
|---------------|---------------|-------------|-------------------------|-----------|-----------|
|               |               |             | X                       | Y         | Z         |
| 1             | 13            | 0           | -1.422638               | 0.597513  | -2.318585 |
| 2             | 13            | 0           | -1.251200               | -2.107868 | -1.671034 |

-----

|    |    |   |           |           |           |
|----|----|---|-----------|-----------|-----------|
| 3  | 13 | 0 | -1.142818 | -2.518313 | 1.172756  |
| 4  | 13 | 0 | -1.389494 | 0.011114  | 2.479849  |
| 5  | 13 | 0 | -1.439574 | 2.066179  | 0.009347  |
| 6  | 13 | 0 | -2.677112 | -0.493095 | 0.056943  |
| 7  | 13 | 0 | -0.151940 | -0.223693 | 0.028042  |
| 8  | 13 | 0 | 0.972341  | 1.997573  | -1.132755 |
| 9  | 13 | 0 | 0.975887  | -0.497320 | -2.406986 |
| 10 | 13 | 0 | 1.121705  | -2.567780 | -0.556691 |
| 11 | 13 | 0 | 1.048564  | -1.372888 | 2.134411  |
| 12 | 13 | 0 | 0.750118  | 1.517309  | 1.895627  |
| 13 | 13 | 0 | 3.428463  | 1.784477  | 2.046252  |
| 14 | 13 | 0 | 3.800008  | 2.369093  | -0.475436 |
| 15 | 13 | 0 | 3.373682  | 0.963359  | -2.564501 |
| 16 | 13 | 0 | 3.504415  | -1.596256 | -1.967410 |
| 17 | 13 | 0 | 3.412160  | -2.531128 | 0.656946  |
| 18 | 13 | 0 | 3.774949  | -0.762743 | 2.460768  |
| 19 | 13 | 0 | 2.454136  | 0.025008  | 0.065322  |
| 20 | 13 | 0 | 5.097831  | -0.212061 | -0.146542 |
| 21 | 6  | 0 | -2.558509 | 3.642559  | 0.440800  |
| 22 | 6  | 0 | -2.026808 | 4.978855  | -0.070239 |
| 23 | 1  | 0 | -2.685361 | 3.673619  | 1.518868  |
| 24 | 1  | 0 | -2.693748 | 5.795217  | 0.193392  |
| 25 | 1  | 0 | -1.052361 | 5.210352  | 0.347738  |
| 26 | 1  | 0 | -1.923154 | 4.983245  | -1.150442 |
| 27 | 1  | 0 | -3.544682 | 3.446504  | 0.028552  |
| 28 | 53 | 0 | -5.201926 | -0.540899 | -0.002333 |

-----

Low frequencies (cm<sup>-1</sup>): 13.6985                      28.9239                      30.7348  
                                         39.9869                      43.0998                      52.0540

Al<sub>20</sub> .... C<sub>2</sub>H<sub>3</sub>I (M062X/TZVP, LANL2DZ level of theory)

-----

| Center | Atomic | Atomic | Coordinates (Angstroms) |           |           |
|--------|--------|--------|-------------------------|-----------|-----------|
|        |        |        | Number                  | Type      | X         |
| 1      | 13     | 0      | 1.230871                | 1.595980  | -1.673408 |
| 2      | 13     | 0      | 1.269718                | 1.911992  | 1.235442  |
| 3      | 13     | 0      | 1.085034                | -0.718720 | 2.382253  |
| 4      | 13     | 0      | 0.957721                | -2.607941 | 0.278009  |
| 5      | 13     | 0      | 1.041278                | -1.235272 | -2.215193 |
| 6      | 13     | 0      | 2.387674                | -0.259775 | -0.013199 |
| 7      | 13     | 0      | -0.082200               | -0.111442 | -0.002050 |
| 8      | 13     | 0      | -1.178395               | 0.372999  | -2.400329 |
| 9      | 13     | 0      | -1.020565               | 2.380683  | -0.242459 |
| 10     | 13     | 0      | -1.122628               | 0.886620  | 2.257721  |
| 11     | 13     | 0      | -1.302382               | -1.864850 | 1.629579  |
| 12     | 13     | 0      | -1.326183               | -2.190269 | -1.156468 |
| 13     | 13     | 0      | -3.833079               | -1.458525 | -2.044215 |
| 14     | 13     | 0      | -3.810459               | 1.096502  | -2.399928 |
| 15     | 13     | 0      | -3.719404               | 2.703126  | -0.400079 |

|    |    |   |           |           |           |
|----|----|---|-----------|-----------|-----------|
| 16 | 13 | 0 | -3.697906 | 1.784194  | 2.001568  |
| 17 | 13 | 0 | -3.745718 | -0.775018 | 2.435366  |
| 18 | 13 | 0 | -3.832213 | -2.430274 | 0.388938  |
| 19 | 13 | 0 | -2.604871 | 0.090207  | -0.010109 |
| 20 | 13 | 0 | -5.114696 | 0.150414  | 0.037780  |
| 21 | 53 | 0 | 5.451731  | -0.448388 | -0.038158 |
| 22 | 6  | 0 | 5.606593  | 1.600842  | 0.455169  |
| 23 | 6  | 0 | 5.146461  | 2.550058  | -0.331086 |
| 24 | 1  | 0 | 4.671905  | 2.356240  | -1.285031 |
| 25 | 1  | 0 | 5.233062  | 3.583217  | -0.013088 |
| 26 | 1  | 0 | 6.074236  | 1.751480  | 1.416167  |

-----  
 Low frequencies (cm<sup>-1</sup>): 26.7450                      9.6741                      22.2692  
                                  25.0620                      44.5554                      66.0993

Coordinate of TS

| Center<br>Number | Atomic<br>Number | Atomic<br>Type | Coordinates (Angstroms) |           |           |
|------------------|------------------|----------------|-------------------------|-----------|-----------|
|                  |                  |                | X                       | Y         | Z         |
| 1                | 13               | 0              | 1.326625                | -0.321805 | -2.352638 |
| 2                | 13               | 0              | 1.796760                | 1.570386  | -0.243945 |
| 3                | 13               | 0              | 1.395631                | 0.319488  | 2.256873  |
| 4                | 13               | 0              | 0.718843                | -2.406574 | 1.763562  |
| 5                | 13               | 0              | 0.665457                | -2.815837 | -1.099717 |
| 6                | 13               | 0              | 2.409756                | -1.093750 | 0.081998  |
| 7                | 13               | 0              | 0.019494                | -0.412491 | 0.029098  |
| 8                | 13               | 0              | -1.284221               | -1.231595 | -2.151042 |
| 9                | 13               | 0              | -0.622645               | 1.531513  | -1.691260 |
| 10               | 13               | 0              | -0.591735               | 1.923264  | 1.189225  |
| 11               | 13               | 0              | -1.189622               | -0.574232 | 2.405078  |
| 12               | 13               | 0              | -1.625389               | -2.484065 | 0.374933  |
| 13               | 13               | 0              | -3.980019               | -1.921102 | -0.960510 |
| 14               | 13               | 0              | -3.658228               | 0.056800  | -2.603685 |
| 15               | 13               | 0              | -3.206340               | 2.408959  | -1.705460 |
| 16               | 13               | 0              | -3.139831               | 2.861382  | 0.812782  |
| 17               | 13               | 0              | -3.453481               | 0.980102  | 2.520412  |
| 18               | 13               | 0              | -3.905377               | -1.444751 | 1.676376  |
| 19               | 13               | 0              | -2.457604               | 0.248277  | -0.031429 |
| 20               | 13               | 0              | -4.989648               | 0.626054  | -0.011472 |
| 21               | 53               | 0              | 5.012346                | -0.201451 | -0.052400 |
| 22               | 6                | 0              | 4.321662                | 2.069821  | -0.462843 |
| 23               | 6                | 0              | 4.841831                | 2.953697  | 0.380683  |
| 24               | 1                | 0              | 4.902243                | 2.794672  | 1.449130  |
| 25               | 1                | 0              | 5.162780                | 3.916200  | -0.008629 |
| 26               | 1                | 0              | 4.330173                | 2.164661  | -1.539664 |

-----  
 Low frequencies (cm<sup>-1</sup>): -583.9606                      9.8440                      35.6502  
                                  39.1406                      43.1813                      73.2957

Optimized geometry after C-I dissociation

| Center Number | Atomic Number | Atomic Type | Coordinates (Angstroms) |           |           |
|---------------|---------------|-------------|-------------------------|-----------|-----------|
|               |               |             | X                       | Y         | Z         |
| 1             | 13            | 0           | 1.353955                | 0.434801  | -2.344229 |
| 2             | 13            | 0           | 1.381155                | 2.085341  | -0.001240 |
| 3             | 13            | 0           | 1.354081                | 0.436899  | 2.343732  |
| 4             | 13            | 0           | 1.190444                | -2.231676 | 1.425367  |
| 5             | 13            | 0           | 1.190506                | -2.232866 | -1.423490 |
| 6             | 13            | 0           | 2.676800                | -0.350895 | 0.000126  |
| 7             | 13            | 0           | 0.133843                | -0.192603 | 0.000077  |
| 8             | 13            | 0           | -1.011726               | -0.934069 | -2.295218 |
| 9             | 13            | 0           | -0.940559               | 1.766040  | -1.505754 |
| 10            | 13            | 0           | -0.940377               | 1.767460  | 1.504158  |
| 11            | 13            | 0           | -1.011744               | -0.932051 | 2.295983  |
| 12            | 13            | 0           | -1.188190               | -2.514763 | 0.000998  |
| 13            | 13            | 0           | -3.527513               | -2.123539 | -1.367010 |
| 14            | 13            | 0           | -3.542456               | 0.115391  | -2.642277 |
| 15            | 13            | 0           | -3.643801               | 2.264659  | -1.286327 |
| 16            | 13            | 0           | -3.643555               | 2.265611  | 1.284987  |
| 17            | 13            | 0           | -3.542898               | 0.116930  | 2.642106  |
| 18            | 13            | 0           | -3.527400               | -2.122803 | 1.368346  |
| 19            | 13            | 0           | -2.446408               | 0.038805  | 0.000049  |
| 20            | 13            | 0           | -5.046011               | -0.056657 | -0.000040 |
| 21            | 53            | 0           | 5.197348                | -0.516484 | -0.000049 |
| 22            | 6             | 0           | 2.321321                | 3.799799  | -0.001163 |
| 23            | 6             | 0           | 3.651411                | 3.872122  | 0.000760  |
| 24            | 1             | 0           | 4.284007                | 2.988311  | 0.002226  |
| 25            | 1             | 0           | 4.177114                | 4.823796  | 0.000878  |
| 26            | 1             | 0           | 1.757139                | 4.729850  | -0.002615 |

Low frequencies (cm<sup>-1</sup>): 6.9541 30.1234 33.6647  
38.3279 59.1907 68.8583

Al<sub>20</sub> .... C<sub>2</sub>H<sub>3</sub>I (B3PW91/TZVP, LANL2DZ level of theory)

Optimized geometry of reactant

| Center Number | Atomic Number | Atomic Type | Coordinates (Angstroms) |           |           |
|---------------|---------------|-------------|-------------------------|-----------|-----------|
|               |               |             | X                       | Y         | Z         |
| 1             | 13            | 0           | 1.193183                | 1.000167  | -2.133014 |
| 2             | 13            | 0           | 1.276633                | 2.174236  | 0.592724  |
| 3             | 13            | 0           | 1.087724                | -0.027105 | 2.463188  |
| 4             | 13            | 0           | 0.926199                | -2.444685 | 0.977718  |
| 5             | 13            | 0           | 0.968197                | -1.853348 | -1.808362 |
| 6             | 13            | 0           | 2.355260                | -0.279983 | 0.006857  |
| 7             | 13            | 0           | -0.129695               | -0.100720 | 0.000477  |
| 8             | 13            | 0           | -1.239081               | -0.335641 | -2.458456 |
| 9             | 13            | 0           | -0.983020               | 2.259710  | -0.994638 |
| 10            | 13            | 0           | -1.105040               | 1.546760  | 1.912657  |

|    |    |   |           |           |           |
|----|----|---|-----------|-----------|-----------|
| 11 | 13 | 0 | -1.332795 | -1.326411 | 2.102897  |
| 12 | 13 | 0 | -1.399926 | -2.444371 | -0.501260 |
| 13 | 13 | 0 | -3.923445 | -1.918403 | -1.586360 |
| 14 | 13 | 0 | -3.870712 | 0.479532  | -2.583757 |
| 15 | 13 | 0 | -3.705494 | 2.557286  | -1.031452 |
| 16 | 13 | 0 | -3.747199 | 2.240872  | 1.548142  |
| 17 | 13 | 0 | -3.816015 | -0.141252 | 2.583186  |
| 18 | 13 | 0 | -3.900044 | -2.237449 | 1.012940  |
| 19 | 13 | 0 | -2.637183 | 0.127268  | -0.025665 |
| 20 | 13 | 0 | -5.145141 | 0.191243  | 0.016271  |
| 21 | 53 | 0 | 5.520951  | -0.477911 | -0.041393 |
| 22 | 6  | 0 | 5.920245  | 1.546345  | 0.447991  |
| 23 | 6  | 0 | 5.547850  | 2.555864  | -0.311603 |
| 24 | 1  | 0 | 5.011906  | 2.439668  | -1.245141 |
| 25 | 1  | 0 | 5.779846  | 3.566741  | 0.010146  |
| 26 | 1  | 0 | 6.447982  | 1.629434  | 1.387318  |

-----  
 Low frequencies (cm<sup>-1</sup>): 5.9371                    10.6963                    18.2956  
                                          20.3960                    33.7943                    48.0619

Coordinate of TS

| Center | Atomic | Atomic | Coordinates (Angstroms) |           |           |
|--------|--------|--------|-------------------------|-----------|-----------|
| Number | Number | Type   | X                       | Y         | Z         |
| 1      | 13     | 0      | 1.325547                | -0.280605 | -2.350040 |
| 2      | 13     | 0      | 1.831042                | 1.559573  | -0.193866 |
| 3      | 13     | 0      | 1.371801                | 0.260203  | 2.304251  |
| 4      | 13     | 0      | 0.692642                | -2.457888 | 1.737055  |
| 5      | 13     | 0      | 0.671439                | -2.794849 | -1.163947 |
| 6      | 13     | 0      | 2.393239                | -1.091145 | 0.094597  |
| 7      | 13     | 0      | -0.017876               | -0.408036 | 0.034162  |
| 8      | 13     | 0      | -1.287749               | -1.174999 | -2.212036 |
| 9      | 13     | 0      | -0.573440               | 1.601069  | -1.681627 |
| 10     | 13     | 0      | -0.529955               | 1.958315  | 1.231579  |
| 11     | 13     | 0      | -1.240438               | -0.618531 | 2.418965  |
| 12     | 13     | 0      | -1.646173               | -2.528638 | 0.292182  |
| 13     | 13     | 0      | -3.997157               | -1.837757 | -1.149466 |
| 14     | 13     | 0      | -3.625957               | 0.258393  | -2.648262 |
| 15     | 13     | 0      | -3.162434               | 2.545471  | -1.534160 |
| 16     | 13     | 0      | -3.139960               | 2.801027  | 1.042150  |
| 17     | 13     | 0      | -3.640525               | 0.764046  | 2.554643  |
| 18     | 13     | 0      | -3.982417               | -1.578356 | 1.502922  |
| 19     | 13     | 0      | -2.470768               | 0.282788  | -0.020135 |
| 20     | 13     | 0      | -5.000135               | 0.637648  | -0.054533 |
| 21     | 53     | 0      | 5.062198                | -0.212716 | -0.034440 |
| 22     | 6      | 0      | 4.352017                | 2.024125  | -0.453511 |
| 23     | 6      | 0      | 4.905657                | 2.939356  | 0.346939  |
| 24     | 1      | 0      | 5.028413                | 2.810675  | 1.414976  |
| 25     | 1      | 0      | 5.170570                | 3.906892  | -0.074769 |
| 26     | 1      | 0      | 4.339028                | 2.105034  | -1.533076 |

Low frequencies (cm<sup>-1</sup>): -472.9188      10.2987      27.8786  
                                  31.1404      39.4897      64.7853

Optimized geometry after C-I dissociation

| Center<br>Number | Atomic<br>Number | Atomic<br>Type | Coordinates (Angstroms)<br>X    Y    Z |           |           |
|------------------|------------------|----------------|----------------------------------------|-----------|-----------|
| 1                | 13               | 0              | 1.354212                               | 0.432837  | -2.373345 |
| 2                | 13               | 0              | 1.406667                               | 2.107817  | 0.009622  |
| 3                | 13               | 0              | 1.358726                               | 0.423973  | 2.367356  |
| 4                | 13               | 0              | 1.199970                               | -2.231052 | 1.425802  |
| 5                | 13               | 0              | 1.193440                               | -2.228323 | -1.440748 |
| 6                | 13               | 0              | 2.693662                               | -0.351315 | -0.009191 |
| 7                | 13               | 0              | 0.121474                               | -0.167529 | -0.003451 |
| 8                | 13               | 0              | -1.027301                              | -0.923265 | -2.324238 |
| 9                | 13               | 0              | -0.916667                              | 1.811880  | -1.543941 |
| 10               | 13               | 0              | -0.920680                              | 1.806404  | 1.545350  |
| 11               | 13               | 0              | -1.019256                              | -0.926030 | 2.321666  |
| 12               | 13               | 0              | -1.169657                              | -2.538141 | 0.001200  |
| 13               | 13               | 0              | -3.517182                              | -2.143211 | -1.351738 |
| 14               | 13               | 0              | -3.640220                              | 0.069625  | -2.650319 |
| 15               | 13               | 0              | -3.637452                              | 2.260089  | -1.307690 |
| 16               | 13               | 0              | -3.644987                              | 2.263559  | 1.289031  |
| 17               | 13               | 0              | -3.618532                              | 0.093536  | 2.660563  |
| 18               | 13               | 0              | -3.516927                              | -2.129417 | 1.372980  |
| 19               | 13               | 0              | -2.454305                              | 0.069234  | -0.000704 |
| 20               | 13               | 0              | -5.058377                              | -0.086361 | 0.006594  |
| 21               | 53               | 0              | 5.222059                               | -0.548637 | 0.001952  |
| 22               | 6                | 0              | 2.311645                               | 3.852232  | -0.000869 |
| 23               | 6                | 0              | 3.635871                               | 4.009774  | -0.002938 |
| 24               | 1                | 0              | 4.329045                               | 3.172816  | 0.000954  |
| 25               | 1                | 0              | 4.096590                               | 4.996408  | -0.008753 |
| 26               | 1                | 0              | 1.694232                               | 4.750505  | -0.005142 |

Low frequencies (cm<sup>-1</sup>): 11.9215      29.9742      35.3539  
                                  38.7809      49.9996      57.3736

Al<sub>20</sub> .... C<sub>2</sub>H<sub>3</sub>I (BHandHLYP/TZVP, LANL2DZ level of theory)

Optimized geometry of reactant

| Center<br>Number | Atomic<br>Number | Atomic<br>Type | Coordinates (Angstroms)<br>X    Y    Z |           |           |
|------------------|------------------|----------------|----------------------------------------|-----------|-----------|
| 1                | 13               | 0              | 1.028331                               | -0.609850 | -2.448888 |
| 2                | 13               | 0              | 1.250251                               | 2.013908  | -1.110700 |
| 3                | 13               | 0              | 1.184732                               | 1.453676  | 1.860366  |
| 4                | 13               | 0              | 0.982748                               | -1.395795 | 2.151411  |
| 5                | 13               | 0              | 0.914588                               | -2.599554 | -0.417787 |
| 6                | 13               | 0              | 2.291664                               | -0.237459 | -0.005431 |



|    |    |   |           |           |           |
|----|----|---|-----------|-----------|-----------|
| 7  | 13 | 0 | -0.174324 | -0.075119 | -0.005222 |
| 8  | 13 | 0 | -1.390649 | -1.774894 | -1.729026 |
| 9  | 13 | 0 | -1.123269 | 1.102072  | -2.245188 |
| 10 | 13 | 0 | -0.971320 | 2.460495  | 0.473884  |
| 11 | 13 | 0 | -1.247654 | 0.228611  | 2.458976  |
| 12 | 13 | 0 | -1.412982 | -2.245617 | 1.050881  |
| 13 | 13 | 0 | -3.943594 | -2.438735 | -0.300725 |
| 14 | 13 | 0 | -3.946555 | -0.880588 | -2.395829 |
| 15 | 13 | 0 | -3.801628 | 1.703423  | -2.093056 |
| 16 | 13 | 0 | -3.691529 | 2.751303  | 0.294541  |
| 17 | 13 | 0 | -3.843273 | 1.196105  | 2.385745  |
| 18 | 13 | 0 | -3.896138 | -1.391552 | 2.111462  |
| 19 | 13 | 0 | -2.685846 | 0.130911  | -0.012456 |
| 20 | 13 | 0 | -5.202279 | 0.209861  | 0.008902  |
| 21 | 53 | 0 | 5.591670  | -0.495819 | -0.032522 |
| 22 | 6  | 0 | 6.014903  | 1.495662  | 0.504725  |
| 23 | 6  | 0 | 5.892245  | 2.502773  | -0.321435 |
| 24 | 1  | 0 | 5.566260  | 2.396791  | -1.339504 |
| 25 | 1  | 0 | 6.122154  | 3.496423  | 0.024657  |
| 26 | 1  | 0 | 6.333603  | 1.578935  | 1.524601  |

-----

Low frequencies (cm<sup>-1</sup>): 15.9140                      6.9734                      18.1216  
                                         19.7704                      22.5028                      34.6699

Coordinate of TS

| -----  |        |        |                         |           |           |  |
|--------|--------|--------|-------------------------|-----------|-----------|--|
| Center | Atomic | Atomic | Coordinates (Angstroms) |           |           |  |
| Number | Number | Type   | X                       | Y         | Z         |  |
| -----  |        |        |                         |           |           |  |
| 1      | 13     | 0      | 1.319490                | -0.197522 | -2.406451 |  |
| 2      | 13     | 0      | 1.792964                | 1.692985  | -0.226097 |  |
| 3      | 13     | 0      | 1.375698                | 0.422534  | 2.306752  |  |
| 4      | 13     | 0      | 0.803645                | -2.337184 | 1.788777  |  |
| 5      | 13     | 0      | 0.756808                | -2.735356 | -1.171664 |  |
| 6      | 13     | 0      | 2.384272                | -0.975419 | 0.072773  |  |
| 7      | 13     | 0      | -0.011888               | -0.315575 | 0.016792  |  |
| 8      | 13     | 0      | -1.262243               | -1.187904 | -2.187347 |  |
| 9      | 13     | 0      | -0.630204               | 1.642574  | -1.726983 |  |
| 10     | 13     | 0      | -0.610594               | 2.042421  | 1.177853  |  |
| 11     | 13     | 0      | -1.189804               | -0.522742 | 2.413632  |  |
| 12     | 13     | 0      | -1.502579               | -2.519871 | 0.368247  |  |
| 13     | 13     | 0      | -3.870563               | -2.007010 | -0.997764 |  |
| 14     | 13     | 0      | -3.721274               | 0.016075  | -2.613167 |  |
| 15     | 13     | 0      | -3.263353               | 2.391984  | -1.673437 |  |
| 16     | 13     | 0      | -3.234669               | 2.802032  | 0.884127  |  |
| 17     | 13     | 0      | -3.602035               | 0.856906  | 2.554078  |  |
| 18     | 13     | 0      | -3.821468               | -1.569384 | 1.657835  |  |
| 19     | 13     | 0      | -2.526021               | 0.272474  | -0.032492 |  |
| 20     | 13     | 0      | -5.129138               | 0.458379  | -0.006399 |  |
| 21     | 53     | 0      | 4.993404                | -0.296687 | -0.023677 |  |
| 22     | 6      | 0      | 4.496987                | 2.076241  | -0.494507 |  |

|    |   |   |          |          |           |
|----|---|---|----------|----------|-----------|
| 23 | 6 | 0 | 5.087333 | 2.921038 | 0.318313  |
| 24 | 1 | 0 | 5.167706 | 2.779794 | 1.379931  |
| 25 | 1 | 0 | 5.462727 | 3.847938 | -0.091428 |
| 26 | 1 | 0 | 4.471701 | 2.117882 | -1.564289 |

-----  
 Low frequencies (cm<sup>-1</sup>): -612.1698                      8.8983                      30.3819  
                                  41.3957                      43.9580                      56.8610

Optimized geometry after C-I dissociation

| -----  |        |        |                         |           |           |  |
|--------|--------|--------|-------------------------|-----------|-----------|--|
| Center | Atomic | Atomic | Coordinates (Angstroms) |           |           |  |
| Number | Number | Type   | X                       | Y         | Z         |  |
| -----  |        |        |                         |           |           |  |
| 1      | 13     | 0      | 1.502057                | 0.743043  | -2.367448 |  |
| 2      | 13     | 0      | 1.519238                | 2.289936  | -0.302322 |  |
| 3      | 13     | 0      | 1.320308                | -0.467822 | 2.559379  |  |
| 4      | 13     | 0      | 1.072750                | -2.621053 | 0.795970  |  |
| 5      | 13     | 0      | 1.208457                | -1.865998 | -1.867835 |  |
| 6      | 13     | 0      | 2.628272                | -0.485700 | 0.049209  |  |
| 7      | 13     | 0      | 0.171906                | -0.023867 | 0.081768  |  |
| 8      | 13     | 0      | -1.018550               | 0.034619  | -2.383628 |  |
| 9      | 13     | 0      | -1.076340               | 2.323089  | -0.673316 |  |
| 10     | 13     | 0      | -0.799989               | 1.084712  | 2.355516  |  |
| 11     | 13     | 0      | -1.146938               | -1.731500 | 1.811860  |  |
| 12     | 13     | 0      | -1.178562               | -2.312887 | -0.967136 |  |
| 13     | 13     | 0      | -3.506119               | -1.170339 | -2.155269 |  |
| 14     | 13     | 0      | -3.370730               | 1.457381  | -2.327415 |  |
| 15     | 13     | 0      | -3.828378               | 2.520917  | -0.052800 |  |
| 16     | 13     | 0      | -3.433555               | 1.556604  | 2.311787  |  |
| 17     | 13     | 0      | -3.779371               | -1.039468 | 2.310026  |  |
| 18     | 13     | 0      | -3.530461               | -2.534639 | 0.210845  |  |
| 19     | 13     | 0      | -2.488964               | 0.111362  | 0.092840  |  |
| 20     | 13     | 0      | -5.147590               | -0.079226 | -0.229589 |  |
| 21     | 53     | 0      | 5.148960                | -0.505657 | 0.015185  |  |
| 22     | 6      | 0      | 2.645842                | 3.528663  | 0.703220  |  |
| 23     | 6      | 0      | 3.921718                | 3.759359  | 0.426153  |  |
| 24     | 1      | 0      | 4.447572                | 3.246284  | -0.363097 |  |
| 25     | 1      | 0      | 4.511447                | 4.472545  | 0.982305  |  |
| 26     | 1      | 0      | 2.213976                | 4.093689  | 1.518010  |  |

-----  
 Low frequencies (cm<sup>-1</sup>): 26.6418                      38.4351                      44.4189  
                                  46.0046                      50.4821                      53.5579

Al<sub>20</sub> .... C<sub>6</sub>H<sub>5</sub>I (M062X/TZVP, LANL2DZ level of theory)

Optimized geometry of reactant

| -----  |        |        |                         |   |   |  |
|--------|--------|--------|-------------------------|---|---|--|
| Center | Atomic | Atomic | Coordinates (Angstroms) |   |   |  |
| Number | Number | Type   | X                       | Y | Z |  |

|    |    |   |           |           |           |
|----|----|---|-----------|-----------|-----------|
| 1  | 13 | 0 | 0.880481  | 0.045363  | -2.305640 |
| 2  | 13 | 0 | 1.287840  | 1.638336  | 0.000768  |
| 3  | 13 | 0 | 0.879995  | 0.044167  | 2.306352  |
| 4  | 13 | 0 | 0.180594  | -2.628578 | 1.463562  |
| 5  | 13 | 0 | 0.180968  | -2.627772 | -1.464414 |
| 6  | 13 | 0 | 1.899529  | -1.084184 | 0.000204  |
| 7  | 13 | 0 | -0.487680 | -0.425327 | 0.000086  |
| 8  | 13 | 0 | -1.727415 | -0.790857 | -2.346829 |
| 9  | 13 | 0 | -1.057880 | 1.796591  | -1.399834 |
| 10 | 13 | 0 | -1.058155 | 1.795955  | 1.400884  |
| 11 | 13 | 0 | -1.727962 | -0.792043 | 2.346515  |
| 12 | 13 | 0 | -2.170100 | -2.506262 | -0.000762 |
| 13 | 13 | 0 | -4.841370 | -2.001124 | -0.000262 |
| 14 | 13 | 0 | -4.456238 | -0.779622 | -2.223298 |
| 15 | 13 | 0 | -3.696350 | 1.695005  | -2.266695 |
| 16 | 13 | 0 | -3.334306 | 2.973530  | 0.000172  |
| 17 | 13 | 0 | -3.696774 | 1.694712  | 2.266763  |
| 18 | 13 | 0 | -4.456746 | -0.779799 | 2.222937  |
| 19 | 13 | 0 | -2.947985 | 0.166140  | -0.000002 |
| 20 | 13 | 0 | -5.352264 | 0.884697  | -0.000215 |
| 21 | 6  | 0 | 4.962376  | 0.805861  | -0.000039 |
| 22 | 6  | 0 | 4.914353  | 1.472917  | 1.212637  |
| 23 | 6  | 0 | 4.827285  | 2.860319  | 1.202868  |
| 24 | 6  | 0 | 4.783355  | 3.552274  | -0.000014 |
| 25 | 6  | 0 | 4.826740  | 2.860311  | -1.202905 |
| 26 | 6  | 0 | 4.913986  | 1.472947  | -1.212701 |
| 27 | 1  | 0 | 4.931902  | 0.930035  | 2.148207  |
| 28 | 1  | 0 | 4.782741  | 3.394687  | 2.142981  |
| 29 | 1  | 0 | 4.706801  | 4.631638  | 0.000001  |
| 30 | 1  | 0 | 4.781720  | 3.394665  | -2.143011 |
| 31 | 1  | 0 | 4.931252  | 0.930096  | -2.148276 |
| 32 | 53 | 0 | 4.992842  | -1.312735 | -0.000052 |

Low frequencies (cm<sup>-1</sup>): 0.5736                    11.4521                    22.1384  
                                         27.4176                    40.5004                    50.9777

Coordinate of TS

| Center Number | Atomic Number | Atomic Type | Coordinates (Angstroms) |           |           |
|---------------|---------------|-------------|-------------------------|-----------|-----------|
|               |               |             | X                       | Y         | Z         |
| 1             | 13            | 0           | -1.615504               | 1.081979  | 0.000126  |
| 2             | 13            | 0           | -0.929930               | -0.406662 | -2.325767 |
| 3             | 13            | 0           | 0.146542                | -2.907310 | -1.446418 |
| 4             | 13            | 0           | 0.143812                | -2.905924 | 1.446239  |
| 5             | 13            | 0           | -0.931219               | -0.405863 | 2.322865  |
| 6             | 13            | 0           | -1.793761               | -1.660839 | -0.002244 |
| 7             | 13            | 0           | 0.461925                | -0.609575 | -0.001017 |
| 8             | 13            | 0           | 0.746378                | 1.616812  | 1.454096  |
| 9             | 13            | 0           | 0.744834                | 1.617476  | -1.454452 |

|    |    |   |           |           |           |
|----|----|---|-----------|-----------|-----------|
| 10 | 13 | 0 | 1.781053  | -0.909516 | -2.300068 |
| 11 | 13 | 0 | 2.415581  | -2.420908 | 0.003992  |
| 12 | 13 | 0 | 1.776759  | -0.907669 | 2.301480  |
| 13 | 13 | 0 | 3.830034  | 0.881082  | 2.606179  |
| 14 | 13 | 0 | 3.132889  | 2.944021  | 1.267565  |
| 15 | 13 | 0 | 3.137051  | 2.933731  | -1.291226 |
| 16 | 13 | 0 | 3.851582  | 0.859586  | -2.603789 |
| 17 | 13 | 0 | 4.584132  | -1.284368 | -1.329098 |
| 18 | 13 | 0 | 4.578142  | -1.271931 | 1.351102  |
| 19 | 13 | 0 | 2.808043  | 0.433667  | -0.001153 |
| 20 | 13 | 0 | 5.257580  | 1.194563  | 0.004259  |
| 21 | 6  | 0 | -4.288490 | 1.154058  | -0.000110 |
| 22 | 6  | 0 | -4.665046 | 1.704151  | 1.215783  |
| 23 | 6  | 0 | -5.335858 | 2.920928  | 1.202371  |
| 24 | 6  | 0 | -5.664143 | 3.536921  | 0.000168  |
| 25 | 6  | 0 | -5.335532 | 2.921387  | -1.202188 |
| 26 | 6  | 0 | -4.664722 | 1.704621  | -1.215893 |
| 27 | 1  | 0 | -4.401223 | 1.226852  | 2.150450  |
| 28 | 1  | 0 | -5.600992 | 3.384648  | 2.144485  |
| 29 | 1  | 0 | -6.193211 | 4.480500  | 0.000279  |
| 30 | 1  | 0 | -5.600407 | 3.385472  | -2.144194 |
| 31 | 1  | 0 | -4.400627 | 1.227676  | -2.150666 |
| 32 | 53 | 0 | -4.485242 | -1.315059 | -0.000676 |

-----  
Low frequencies (cm<sup>-1</sup>): -411.2522                      8.0884                      20.9008  
                                         34.5935                      35.0842                      58.2672

Optimized geometry after C-I dissociation

| Center<br>Number | Atomic<br>Number | Atomic<br>Type | Coordinates (Angstroms) |           |           |
|------------------|------------------|----------------|-------------------------|-----------|-----------|
|                  |                  |                | X                       | Y         | Z         |
| 1                | 13               | 0              | 1.514443                | 1.337253  | 0.028846  |
| 2                | 13               | 0              | 1.112270                | -0.291245 | 2.337461  |
| 3                | 13               | 0              | 0.345308                | -2.840206 | 1.386954  |
| 4                | 13               | 0              | 0.344696                | -2.797058 | -1.464458 |
| 5                | 13               | 0              | 1.112013                | -0.218910 | -2.337394 |
| 6                | 13               | 0              | 2.221828                | -1.329317 | -0.016606 |
| 7                | 13               | 0              | -0.219288               | -0.591995 | -0.004835 |
| 8                | 13               | 0              | -0.822925               | 1.590271  | -1.468344 |
| 9                | 13               | 0              | -0.820057               | 1.543867  | 1.529772  |
| 10               | 13               | 0              | -1.500659               | -1.082318 | 2.284993  |
| 11               | 13               | 0              | -2.031901               | -2.549783 | -0.037204 |
| 12               | 13               | 0              | -1.499671               | -1.010344 | -2.309516 |
| 13               | 13               | 0              | -3.723995               | 0.593625  | -2.630242 |
| 14               | 13               | 0              | -3.342756               | 2.683436  | -1.231053 |
| 15               | 13               | 0              | -3.337804               | 2.640246  | 1.338097  |
| 16               | 13               | 0              | -3.736033               | 0.499545  | 2.654254  |
| 17               | 13               | 0              | -4.220998               | -1.663415 | 1.341598  |
| 18               | 13               | 0              | -4.223730               | -1.612895 | -1.392897 |
| 19               | 13               | 0              | -2.680425               | 0.220153  | 0.008763  |
| 20               | 13               | 0              | -5.234293               | 0.717435  | 0.016656  |

|    |    |   |          |           |           |
|----|----|---|----------|-----------|-----------|
| 21 | 6  | 0 | 2.785807 | 2.831174  | 0.024211  |
| 22 | 6  | 0 | 3.096729 | 3.507586  | -1.160428 |
| 23 | 6  | 0 | 4.003352 | 4.560125  | -1.169097 |
| 24 | 6  | 0 | 4.618291 | 4.956391  | 0.011383  |
| 25 | 6  | 0 | 4.325124 | 4.296629  | 1.197663  |
| 26 | 6  | 0 | 3.417760 | 3.244334  | 1.201919  |
| 27 | 1  | 0 | 2.629123 | 3.212055  | -2.094142 |
| 28 | 1  | 0 | 4.230819 | 5.069890  | -2.097336 |
| 29 | 1  | 0 | 5.325121 | 5.776842  | 0.006537  |
| 30 | 1  | 0 | 4.804412 | 4.600289  | 2.120373  |
| 31 | 1  | 0 | 3.205008 | 2.741351  | 2.139614  |
| 32 | 53 | 0 | 4.641412 | -2.031630 | -0.021923 |

-----  
 Low frequencies (cm<sup>-1</sup>): 13.6700                    15.3721                    22.1365  
                                  34.5015                    38.5625                    41.0850

Al<sub>20</sub> .... C<sub>6</sub>H<sub>5</sub>I (B3PW91/TZVP, LANL2DZ level of theory)

Optimized geometry of reactant

| Center<br>Number | Atomic<br>Number | Atomic<br>Type | Coordinates (Angstroms) |           |           |
|------------------|------------------|----------------|-------------------------|-----------|-----------|
|                  |                  |                | X                       | Y         | Z         |
| 1                | 13               | 0              | -0.714307               | 0.244448  | 2.323640  |
| 2                | 13               | 0              | -1.068029               | 1.849083  | -0.003494 |
| 3                | 13               | 0              | -0.713144               | 0.237126  | -2.325237 |
| 4                | 13               | 0              | -0.162733               | -2.465030 | -1.476847 |
| 5                | 13               | 0              | -0.163385               | -2.460618 | 1.483699  |
| 6                | 13               | 0              | -1.790388               | -0.821098 | 0.000678  |
| 7                | 13               | 0              | 0.647930                | -0.300866 | 0.000391  |
| 8                | 13               | 0              | 1.854738                | -0.745197 | 2.379062  |
| 9                | 13               | 0              | 1.297518                | 1.918182  | 1.415374  |
| 10               | 13               | 0              | 1.298314                | 1.913702  | -1.421208 |
| 11               | 13               | 0              | 1.855968                | -0.752332 | -2.376425 |
| 12               | 13               | 0              | 2.164437                | -2.530360 | 0.003852  |
| 13               | 13               | 0              | 4.863223                | -2.065367 | 0.004832  |
| 14               | 13               | 0              | 4.605848                | -0.779518 | 2.247288  |
| 15               | 13               | 0              | 3.955520                | 1.735365  | 2.262918  |
| 16               | 13               | 0              | 3.625918                | 3.004090  | -0.004786 |
| 17               | 13               | 0              | 3.956626                | 1.727068  | -2.267752 |
| 18               | 13               | 0              | 4.607021                | -0.787741 | -2.242465 |
| 19               | 13               | 0              | 3.123969                | 0.177328  | 0.000297  |
| 20               | 13               | 0              | 5.553176                | 0.819758  | -0.000298 |
| 21               | 6                | 0              | -5.558793               | 0.558054  | -0.000237 |
| 22               | 6                | 0              | -5.787226               | 1.186876  | -1.213102 |
| 23               | 6                | 0              | -6.273869               | 2.489227  | -1.202160 |
| 24               | 6                | 0              | -6.523458               | 3.136468  | 0.000675  |
| 25               | 6                | 0              | -6.285438               | 2.484035  | 1.203058  |
| 26               | 6                | 0              | -5.798863               | 1.181653  | 1.213075  |
| 27               | 1                | 0              | -5.589553               | 0.682939  | -2.150318 |
| 28               | 1                | 0              | -6.454754               | 2.994640  | -2.143863 |

|    |    |   |           |           |           |
|----|----|---|-----------|-----------|-----------|
| 29 | 1  | 0 | -6.901452 | 4.152108  | 0.001047  |
| 30 | 1  | 0 | -6.475400 | 2.985399  | 2.145138  |
| 31 | 1  | 0 | -5.610211 | 0.673681  | 2.149975  |
| 32 | 53 | 0 | -4.829804 | -1.446055 | -0.001049 |

-----  
 Low frequencies (cm<sup>-1</sup>): 11.7299                      4.6816                      7.9510  
                                  12.6799                      22.5188                      30.2721

Coordinate of TS

| -----  |        |        |                         |           |           |  |
|--------|--------|--------|-------------------------|-----------|-----------|--|
| Center | Atomic | Atomic | Coordinates (Angstroms) |           |           |  |
| Number | Number | Type   | X                       | Y         | Z         |  |
| -----  |        |        |                         |           |           |  |
| 1      | 13     | 0      | -1.615202               | 1.124876  | -0.000141 |  |
| 2      | 13     | 0      | -0.907919               | -0.359976 | -2.342134 |  |
| 3      | 13     | 0      | 0.115776                | -2.876542 | -1.465614 |  |
| 4      | 13     | 0      | 0.115594                | -2.876292 | 1.465904  |  |
| 5      | 13     | 0      | -0.908052               | -0.359628 | 2.341962  |  |
| 6      | 13     | 0      | -1.795494               | -1.592374 | -0.000058 |  |
| 7      | 13     | 0      | 0.500802                | -0.567862 | -0.000028 |  |
| 8      | 13     | 0      | 0.731483                | 1.682508  | 1.466417  |  |
| 9      | 13     | 0      | 0.731432                | 1.682327  | -1.466710 |  |
| 10     | 13     | 0      | 1.802892                | -0.887929 | -2.330124 |  |
| 11     | 13     | 0      | 2.402021                | -2.456752 | 0.000333  |  |
| 12     | 13     | 0      | 1.802691                | -0.887538 | 2.330291  |  |
| 13     | 13     | 0      | 3.951376                | 0.843614  | 2.615528  |  |
| 14     | 13     | 0      | 3.184817                | 2.927027  | 1.293716  |  |
| 15     | 13     | 0      | 3.184978                | 2.926400  | -1.295030 |  |
| 16     | 13     | 0      | 3.952217                | 0.842343  | -2.615465 |  |
| 17     | 13     | 0      | 4.603226                | -1.318235 | -1.333480 |  |
| 18     | 13     | 0      | 4.602969                | -1.317539 | 1.334631  |  |
| 19     | 13     | 0      | 2.843052                | 0.458202  | -0.000053 |  |
| 20     | 13     | 0      | 5.316468                | 1.148503  | 0.000108  |  |
| 21     | 6      | 0      | -4.405925               | 1.137116  | -0.000047 |  |
| 22     | 6      | 0      | -4.783128               | 1.683378  | 1.216179  |  |
| 23     | 6      | 0      | -5.464482               | 2.896090  | 1.203175  |  |
| 24     | 6      | 0      | -5.798667               | 3.507875  | 0.000019  |  |
| 25     | 6      | 0      | -5.464680               | 2.896047  | -1.203171 |  |
| 26     | 6      | 0      | -4.783319               | 1.683341  | -1.216237 |  |
| 27     | 1      | 0      | -4.520369               | 1.208738  | 2.153028  |  |
| 28     | 1      | 0      | -5.731981               | 3.359378  | 2.146755  |  |
| 29     | 1      | 0      | -6.338339               | 4.447466  | 0.000047  |  |
| 30     | 1      | 0      | -5.732331               | 3.359301  | -2.146725 |  |
| 31     | 1      | 0      | -4.520700               | 1.208669  | -2.153113 |  |
| 32     | 53     | 0      | -4.508523               | -1.361573 | -0.000003 |  |

-----  
 Low frequencies (cm<sup>-1</sup>): -322.2668                      8.2769                      18.5751  
                                  28.5813                      36.7027                      55.8702

Optimized geometry after C-I dissociation

| -----  |        |        |                         |  |  |  |
|--------|--------|--------|-------------------------|--|--|--|
| Center | Atomic | Atomic | Coordinates (Angstroms) |  |  |  |

| Number | Number | Type | X         | Y         | Z         |
|--------|--------|------|-----------|-----------|-----------|
| 1      | 13     | 0    | 1.527722  | 1.368985  | 0.006519  |
| 2      | 13     | 0    | 1.109228  | -0.277481 | 2.356371  |
| 3      | 13     | 0    | 0.338477  | -2.825018 | 1.410548  |
| 4      | 13     | 0    | 0.333898  | -2.802181 | -1.456985 |
| 5      | 13     | 0    | 1.101077  | -0.239009 | -2.365657 |
| 6      | 13     | 0    | 2.225961  | -1.330685 | -0.014295 |
| 7      | 13     | 0    | -0.235897 | -0.558525 | -0.004502 |
| 8      | 13     | 0    | -0.807513 | 1.622971  | -1.520542 |
| 9      | 13     | 0    | -0.795192 | 1.597966  | 1.556010  |
| 10     | 13     | 0    | -1.515292 | -1.048035 | 2.318720  |
| 11     | 13     | 0    | -2.034836 | -2.567476 | -0.019691 |
| 12     | 13     | 0    | -1.520800 | -1.007226 | -2.331237 |
| 13     | 13     | 0    | -3.819389 | 0.578427  | -2.645972 |
| 14     | 13     | 0    | -3.357739 | 2.684787  | -1.254812 |
| 15     | 13     | 0    | -3.344746 | 2.654497  | 1.339463  |
| 16     | 13     | 0    | -3.829398 | 0.511264  | 2.667764  |
| 17     | 13     | 0    | -4.225778 | -1.657888 | 1.349132  |
| 18     | 13     | 0    | -4.229929 | -1.620975 | -1.377990 |
| 19     | 13     | 0    | -2.691694 | 0.262212  | 0.010144  |
| 20     | 13     | 0    | -5.263696 | 0.704295  | 0.014918  |
| 21     | 6      | 0    | 2.845440  | 2.838257  | 0.014229  |
| 22     | 6      | 0    | 3.172560  | 3.521804  | -1.163490 |
| 23     | 6      | 0    | 4.104819  | 4.552568  | -1.161128 |
| 24     | 6      | 0    | 4.730777  | 4.921957  | 0.022787  |
| 25     | 6      | 0    | 4.421768  | 4.255896  | 1.202014  |
| 26     | 6      | 0    | 3.489189  | 3.225344  | 1.196053  |
| 27     | 1      | 0    | 2.698523  | 3.250101  | -2.101884 |
| 28     | 1      | 0    | 4.343462  | 5.066719  | -2.086160 |
| 29     | 1      | 0    | 5.459077  | 5.725594  | 0.026085  |
| 30     | 1      | 0    | 4.908903  | 4.537368  | 2.129601  |
| 31     | 1      | 0    | 3.266526  | 2.718802  | 2.130269  |
| 32     | 53     | 0    | 4.645248  | -2.072742 | -0.023650 |

Low frequencies (cm<sup>-1</sup>): 8.0393                 18.1768                 18.9229  
                                         30.4278                 37.7209                 40.4050

Al<sub>20</sub> .... C<sub>6</sub>H<sub>5</sub>I (BHandHLYP/TZVP, LANL2DZ level of theory)

Optimized geometry of reactant

| Center Number | Atomic Number | Atomic Type | Coordinates (Angstroms) |           |           |
|---------------|---------------|-------------|-------------------------|-----------|-----------|
|               |               |             | X                       | Y         | Z         |
| 1             | 13            | 0           | 0.897713                | 0.984913  | -1.875816 |
| 2             | 13            | 0           | 1.050029                | 1.682237  | 0.874474  |
| 3             | 13            | 0           | 0.527471                | -0.614946 | 2.489971  |
| 4             | 13            | 0           | 0.073544                | -2.903614 | 0.632590  |
| 5             | 13            | 0           | 0.281416                | -1.790449 | -2.136550 |
| 6             | 13            | 0           | 1.735365                | -0.856539 | 0.016316  |

|    |    |   |           |           |           |
|----|----|---|-----------|-----------|-----------|
| 7  | 13 | 0 | -0.678258 | -0.319760 | 0.009704  |
| 8  | 13 | 0 | -1.690465 | 0.150539  | -2.452686 |
| 9  | 13 | 0 | -1.216173 | 2.260109  | -0.617279 |
| 10 | 13 | 0 | -1.445321 | 1.296292  | 2.036442  |
| 11 | 13 | 0 | -1.982422 | -1.619103 | 1.982097  |
| 12 | 13 | 0 | -2.133445 | -2.375450 | -0.956830 |
| 13 | 13 | 0 | -4.830384 | -1.967624 | -0.704205 |
| 14 | 13 | 0 | -4.449463 | -0.138585 | -2.525269 |
| 15 | 13 | 0 | -3.796752 | 2.287533  | -1.835938 |
| 16 | 13 | 0 | -3.655962 | 2.925582  | 0.712167  |
| 17 | 13 | 0 | -4.176652 | 1.125778  | 2.523260  |
| 18 | 13 | 0 | -4.702762 | -1.331288 | 1.821757  |
| 19 | 13 | 0 | -3.150153 | 0.187663  | 0.013020  |
| 20 | 13 | 0 | -5.597545 | 0.810364  | -0.012129 |
| 21 | 6  | 0 | 5.567350  | 0.570746  | -0.000545 |
| 22 | 6  | 0 | 5.783541  | 1.207418  | 1.202587  |
| 23 | 6  | 0 | 6.239324  | 2.512591  | 1.191807  |
| 24 | 6  | 0 | 6.472504  | 3.160751  | -0.005136 |
| 25 | 6  | 0 | 6.249296  | 2.504788  | -1.199770 |
| 26 | 6  | 0 | 5.793625  | 1.199584  | -1.205921 |
| 27 | 1  | 0 | 5.600343  | 0.705727  | 2.133800  |
| 28 | 1  | 0 | 6.408944  | 3.019042  | 2.124782  |
| 29 | 1  | 0 | 6.825583  | 4.175953  | -0.006961 |
| 30 | 1  | 0 | 6.426663  | 3.005279  | -2.134514 |
| 31 | 1  | 0 | 5.618526  | 0.691674  | -2.135317 |
| 32 | 53 | 0 | 4.881301  | -1.431140 | 0.003469  |

-----

Low frequencies (cm<sup>-1</sup>): 10.3096                      9.7079                      11.4434  
                                         14.9110                      23.5746                      25.5161

Coordinate of TS

-----

| Center<br>Number | Atomic<br>Number | Atomic<br>Type | Coordinates (Angstroms) |           |           |
|------------------|------------------|----------------|-------------------------|-----------|-----------|
|                  |                  |                | X                       | Y         | Z         |
| 1                | 13               | 0              | 1.607713                | 1.206097  | 0.000195  |
| 2                | 13               | 0              | 0.909136                | -0.286647 | 2.372648  |
| 3                | 13               | 0              | -0.074698               | -2.836922 | 1.495727  |
| 4                | 13               | 0              | -0.075486               | -2.837449 | -1.495446 |
| 5                | 13               | 0              | 0.908858                | -0.286982 | -2.373312 |
| 6                | 13               | 0              | 1.764908                | -1.534777 | -0.000705 |
| 7                | 13               | 0              | -0.503278               | -0.502230 | -0.000329 |
| 8                | 13               | 0              | -0.761803               | 1.742493  | -1.465175 |
| 9                | 13               | 0              | -0.762765               | 1.742514  | 1.464238  |
| 10               | 13               | 0              | -1.785350               | -0.851172 | 2.324908  |
| 11               | 13               | 0              | -2.329397               | -2.462668 | 0.001412  |
| 12               | 13               | 0              | -1.786200               | -0.852542 | -2.324657 |
| 13               | 13               | 0              | -3.985242               | 0.813156  | -2.619257 |
| 14               | 13               | 0              | -3.238587               | 2.913532  | -1.299197 |
| 15               | 13               | 0              | -3.238192               | 2.917331  | 1.290850  |

-----





|    |    |   |          |           |           |
|----|----|---|----------|-----------|-----------|
| 26 | 6  | 0 | 4.288568 | 2.418035  | -0.267638 |
| 27 | 1  | 0 | 1.540545 | 4.358497  | -0.109677 |
| 28 | 1  | 0 | 3.203613 | 6.001717  | 0.558526  |
| 29 | 1  | 0 | 5.579945 | 5.375697  | 0.703312  |
| 30 | 1  | 0 | 6.269872 | 3.073460  | 0.169672  |
| 31 | 1  | 0 | 4.622105 | 1.419317  | -0.491156 |
| 32 | 53 | 0 | 4.615857 | -1.912450 | 0.045576  |

-----  
Low frequencies (cm<sup>-1</sup>): 14.5949                      20.2871                      35.2431

|         |         |         |
|---------|---------|---------|
| 37.9174 | 43.6554 | 44.4774 |
|---------|---------|---------|

## Sample IRC plot (for Al<sub>5</sub> cluster with ethyl iodide)

# Total Energy along IRC  
# X-Axis: Intrinsic Reaction Coordinate  
# Y-Axis: Total Energy (Hartree)

---

| X             | Y                |
|---------------|------------------|
| -5.0889700000 | -1302.5886851900 |
| -4.8345600000 | -1302.5880730200 |
| -4.5801100000 | -1302.5874333000 |
| -4.3256600000 | -1302.5867657000 |
| -4.0712000000 | -1302.5860699800 |
| -3.8167500000 | -1302.5853465400 |
| -3.5623000000 | -1302.5845964900 |
| -3.3078600000 | -1302.5838221500 |
| -3.0534100000 | -1302.5830271100 |
| -2.7989600000 | -1302.5822167700 |
| -2.5445000000 | -1302.5813985200 |
| -2.2900500000 | -1302.5805820300 |
| -2.0356000000 | -1302.5797793300 |
| -1.7811400000 | -1302.5790049200 |
| -1.5266900000 | -1302.5782755400 |
| -1.2722300000 | -1302.5776097300 |
| -1.0178000000 | -1302.5770270800 |
| -0.7633500000 | -1302.5765474800 |
| -0.5089000000 | -1302.5761892700 |
| -0.2544800000 | -1302.5759679300 |
| 0.0000000000  | -1302.5758928500 |
| 0.2545100000  | -1302.5759655900 |
| 0.5089300000  | -1302.5761786000 |
| 0.7633500000  | -1302.5765147900 |
| 1.0177500000  | -1302.5769479700 |
| 1.2721600000  | -1302.5774472500 |
| 1.5265400000  | -1302.5779808800 |
| 1.7808900000  | -1302.5785209900 |
| 2.0351800000  | -1302.5790463700 |
| 2.2894500000  | -1302.5795448300 |
| 2.5432000000  | -1302.5800101200 |
| 2.7968400000  | -1302.5804407100 |
| 3.0496300000  | -1302.5808380800 |
| 3.3026400000  | -1302.5812041900 |
| 3.5564200000  | -1302.5815454900 |
| 3.8103000000  | -1302.5818607100 |
| 4.0643400000  | -1302.5821547800 |
| 4.3185400000  | -1302.5824297400 |
| 4.5727900000  | -1302.5826868700 |
| 4.8266300000  | -1302.5829274600 |
| 5.0796900000  | -1302.5831520700 |

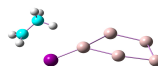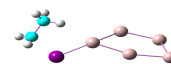

Sample IRC Plot  
(Screenshot  
taken from  
Gaussview 5.0)

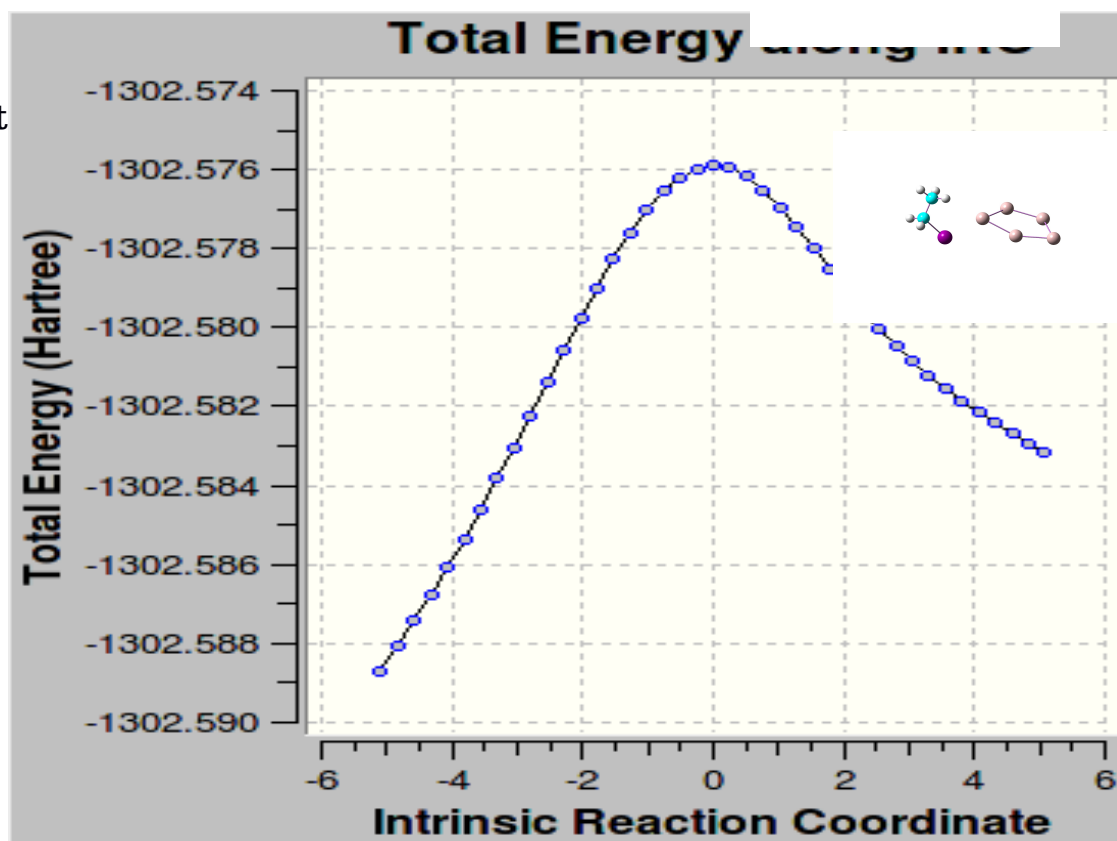

Grid data for Three Dimensional Potential energy surface

**DFT Functional: B3PW91**  
**BASIS SET: TZVP(Al,C,H)+LANL2DZ,LANL2(I)**  
 # 2-Coordinate Scan of Total Energy  
 # X-axis = Scan Coordinate 1 = C-I bond  
 # Y-axis = Scan Coordinate 2 = C-I-Al angle  
 # Z-axis = Energy

| # | Node | X                | Y                | Z                 |
|---|------|------------------|------------------|-------------------|
| 1 | 1    | 2.0395485475E+00 | 8.7000040532E+01 | -8.1775600451E+02 |
| 1 | 2    | 2.0395485475E+00 | 8.7500040532E+01 | -8.1775531412E+02 |
| 1 | 3    | 2.0395485475E+00 | 8.8000040532E+01 | -8.1775602771E+02 |
| 1 | 4    | 2.0395485475E+00 | 8.8500040532E+01 | -8.1775582233E+02 |
| 1 | 5    | 2.0395485475E+00 | 8.9000040532E+01 | -8.1775608467E+02 |
| 1 | 6    | 2.0395485475E+00 | 8.9500040532E+01 | -8.1775607306E+02 |

|   |    |                  |                  |                   |
|---|----|------------------|------------------|-------------------|
| 1 | 7  | 2.0395485475E+00 | 9.0000040532E+01 | -8.1775610458E+02 |
| 1 | 8  | 2.0395485475E+00 | 9.0500040532E+01 | -8.1775598775E+02 |
| 1 | 9  | 2.0395485475E+00 | 9.1000040532E+01 | -8.1775601996E+02 |
| 1 | 10 | 2.0395485475E+00 | 9.1500040532E+01 | -8.1775611620E+02 |
| 1 | 11 | 2.0395485475E+00 | 9.2000040532E+01 | -8.1775610572E+02 |
| 1 | 12 | 2.0395485475E+00 | 9.2500040532E+01 | -8.1775611213E+02 |
| 1 | 13 | 2.0395485475E+00 | 9.3000040532E+01 | -8.1775610152E+02 |
| 1 | 14 | 2.0395485475E+00 | 9.3500040532E+01 | -8.1775606157E+02 |
| 1 | 15 | 2.0395485475E+00 | 9.4000040532E+01 | -8.1775603738E+02 |
| 1 | 16 | 2.0395485475E+00 | 9.4500040532E+01 | -8.1775606717E+02 |
| 1 | 17 | 2.0395485475E+00 | 9.5000040532E+01 | -8.1775602862E+02 |
| 1 | 18 | 2.0395485475E+00 | 9.5500040532E+01 | -8.1775598801E+02 |
| 1 | 19 | 2.0395485475E+00 | 9.6000040532E+01 | -8.1775596287E+02 |
| 1 | 20 | 2.0395485475E+00 | 9.6500040532E+01 | -8.1775572735E+02 |
| 1 | 21 | 2.0395485475E+00 | 9.7000040532E+01 | -8.1775596681E+02 |
| 1 | 22 | 2.0395485475E+00 | 9.7500040532E+01 | -8.1775584937E+02 |
| 1 | 23 | 2.0395485475E+00 | 9.8000040532E+01 | -8.1775586331E+02 |
| 1 | 24 | 2.0395485475E+00 | 9.8500040532E+01 | -8.1775584736E+02 |
| 1 | 25 | 2.0395485475E+00 | 9.9000040532E+01 | -8.1775581306E+02 |
| 1 | 26 | 2.0395485475E+00 | 9.9500040532E+01 | -8.1775578389E+02 |
| 1 | 27 | 2.0395485475E+00 | 1.0000004053E+02 | -8.1775575939E+02 |
| 1 | 28 | 2.0395485475E+00 | 1.0050004053E+02 | -8.1775541311E+02 |
| 1 | 29 | 2.0395485475E+00 | 1.0100004053E+02 | -8.1775569547E+02 |
| 1 | 30 | 2.0395485475E+00 | 1.0150004053E+02 | -8.1775569736E+02 |
| 1 | 31 | 2.0395485475E+00 | 1.0200004053E+02 | -8.1775566262E+02 |
| 1 | 32 | 2.0395485475E+00 | 1.0250004053E+02 | -8.1775556685E+02 |
| 1 | 33 | 2.0395485475E+00 | 1.0300004053E+02 | -8.1775534580E+02 |
| 1 | 34 | 2.0395485475E+00 | 1.0350004053E+02 | -8.1775479981E+02 |
| 1 | 35 | 2.0395485475E+00 | 1.0400004053E+02 | -8.1775549892E+02 |
| 1 | 36 | 2.0395485475E+00 | 1.0450004053E+02 | -8.1775548477E+02 |
| 1 | 37 | 2.0395485475E+00 | 1.0500004053E+02 | -8.1775544664E+02 |
| 1 | 38 | 2.0395485475E+00 | 1.0550004053E+02 | -8.1775538524E+02 |
| 1 | 39 | 2.0395485475E+00 | 1.0600004053E+02 | -8.1775535075E+02 |
| 1 | 40 | 2.0395485475E+00 | 1.0650004053E+02 | -8.1775534299E+02 |
| 1 | 41 | 2.0395485475E+00 | 1.0700004053E+02 | -8.1775531081E+02 |
| 1 | 42 | 2.0395485475E+00 | 1.0750004053E+02 | -8.1775527719E+02 |
| 1 | 43 | 2.0395485475E+00 | 1.0800004053E+02 | -8.1775524477E+02 |
| 1 | 44 | 2.0395485475E+00 | 1.0850004053E+02 | -8.1775521450E+02 |
| 1 | 45 | 2.0395485475E+00 | 1.0900004053E+02 | -8.1775518583E+02 |
| 1 | 46 | 2.0395485475E+00 | 1.0950004053E+02 | -8.1775515257E+02 |
| 1 | 47 | 2.0395485475E+00 | 1.1000004053E+02 | -8.1775512130E+02 |
| 1 | 48 | 2.0395485475E+00 | 1.1050004053E+02 | -8.1775508506E+02 |
| 1 | 49 | 2.0395485475E+00 | 1.1100004053E+02 | -8.1775505552E+02 |
| 1 | 50 | 2.0395485475E+00 | 1.1150004053E+02 | -8.1775502563E+02 |
| 1 | 51 | 2.0395485475E+00 | 1.1200004053E+02 | -8.1775499650E+02 |
| 1 | 52 | 2.0395485475E+00 | 1.1250004053E+02 | -8.1775496716E+02 |
| 1 | 53 | 2.0395485475E+00 | 1.1300004053E+02 | -8.1775485930E+02 |
| 1 | 54 | 2.0395485475E+00 | 1.1350004053E+02 | -8.1775490776E+02 |
| 1 | 55 | 2.0395485475E+00 | 1.1400004053E+02 | -8.1775482264E+02 |
| 1 | 56 | 2.0395485475E+00 | 1.1450004053E+02 | -8.1775483099E+02 |
| 1 | 57 | 2.0395485475E+00 | 1.1500004053E+02 | -8.1775480085E+02 |
| 1 | 58 | 2.0395485475E+00 | 1.1550004053E+02 | -8.1775468864E+02 |

|   |    |                  |                  |                   |
|---|----|------------------|------------------|-------------------|
| 1 | 59 | 2.0395485475E+00 | 1.1600004053E+02 | -8.1775472290E+02 |
| 1 | 60 | 2.0395485475E+00 | 1.1650004053E+02 | -8.1775471606E+02 |
| 1 | 61 | 2.0395485475E+00 | 1.1700004053E+02 | -8.1775468662E+02 |
| 2 | 1  | 2.0495485475E+00 | 8.7000040532E+01 | -8.1775681471E+02 |
| 2 | 2  | 2.0495485475E+00 | 8.7500040532E+01 | -8.1775684534E+02 |
| 2 | 3  | 2.0495485475E+00 | 8.8000040532E+01 | -8.1775686549E+02 |
| 2 | 4  | 2.0495485475E+00 | 8.8500040532E+01 | -8.1775687802E+02 |
| 2 | 5  | 2.0495485475E+00 | 8.9000040532E+01 | -8.1775690341E+02 |
| 2 | 6  | 2.0495485475E+00 | 8.9500040532E+01 | -8.1775691140E+02 |
| 2 | 7  | 2.0495485475E+00 | 9.0000040532E+01 | -8.1775692012E+02 |
| 2 | 8  | 2.0495485475E+00 | 9.0500040532E+01 | -8.1775685826E+02 |
| 2 | 9  | 2.0495485475E+00 | 9.1000040532E+01 | -8.1775693093E+02 |
| 2 | 10 | 2.0495485475E+00 | 9.1500040532E+01 | -8.1775693011E+02 |
| 2 | 11 | 2.0495485475E+00 | 9.2000040532E+01 | -8.1775692948E+02 |
| 2 | 12 | 2.0495485475E+00 | 9.2500040532E+01 | -8.1775692102E+02 |
| 2 | 13 | 2.0495485475E+00 | 9.3000040532E+01 | -8.1775690993E+02 |
| 2 | 14 | 2.0495485475E+00 | 9.3500040532E+01 | -8.1775687399E+02 |
| 2 | 15 | 2.0495485475E+00 | 9.4000040532E+01 | -8.1775685356E+02 |
| 2 | 16 | 2.0495485475E+00 | 9.4500040532E+01 | -8.1775673114E+02 |
| 2 | 17 | 2.0495485475E+00 | 9.5000040532E+01 | -8.1775679786E+02 |
| 2 | 18 | 2.0495485475E+00 | 9.5500040532E+01 | -8.1775680460E+02 |
| 2 | 19 | 2.0495485475E+00 | 9.6000040532E+01 | -8.1775649956E+02 |
| 2 | 20 | 2.0495485475E+00 | 9.6500040532E+01 | -8.1775679718E+02 |
| 2 | 21 | 2.0495485475E+00 | 9.7000040532E+01 | -8.1775646489E+02 |
| 2 | 22 | 2.0495485475E+00 | 9.7500040532E+01 | -8.1775670305E+02 |
| 2 | 23 | 2.0495485475E+00 | 9.8000040532E+01 | -8.1775667604E+02 |
| 2 | 24 | 2.0495485475E+00 | 9.8500040532E+01 | -8.1775665001E+02 |
| 2 | 25 | 2.0495485475E+00 | 9.9000040532E+01 | -8.1775643273E+02 |
| 2 | 26 | 2.0495485475E+00 | 9.9500040532E+01 | -8.1775659284E+02 |
| 2 | 27 | 2.0495485475E+00 | 1.0000004053E+02 | -8.1775657178E+02 |
| 2 | 28 | 2.0495485475E+00 | 1.0050004053E+02 | -8.1775650499E+02 |
| 2 | 29 | 2.0495485475E+00 | 1.0100004053E+02 | -8.1775653619E+02 |
| 2 | 30 | 2.0495485475E+00 | 1.0150004053E+02 | -8.1775650107E+02 |
| 2 | 31 | 2.0495485475E+00 | 1.0200004053E+02 | -8.1775642062E+02 |
| 2 | 32 | 2.0495485475E+00 | 1.0250004053E+02 | -8.1775625117E+02 |
| 2 | 33 | 2.0495485475E+00 | 1.0300004053E+02 | -8.1775637924E+02 |
| 2 | 34 | 2.0495485475E+00 | 1.0350004053E+02 | -8.1775623275E+02 |
| 2 | 35 | 2.0495485475E+00 | 1.0400004053E+02 | -8.1775575329E+02 |
| 2 | 36 | 2.0495485475E+00 | 1.0450004053E+02 | -8.1775629092E+02 |
| 2 | 37 | 2.0495485475E+00 | 1.0500004053E+02 | -8.1775625211E+02 |
| 2 | 38 | 2.0495485475E+00 | 1.0550004053E+02 | -8.1775621087E+02 |
| 2 | 39 | 2.0495485475E+00 | 1.0600004053E+02 | -8.1775617473E+02 |
| 2 | 40 | 2.0495485475E+00 | 1.0650004053E+02 | -8.1775614846E+02 |
| 2 | 41 | 2.0495485475E+00 | 1.0700004053E+02 | -8.1775611389E+02 |
| 2 | 42 | 2.0495485475E+00 | 1.0750004053E+02 | -8.1775608118E+02 |
| 2 | 43 | 2.0495485475E+00 | 1.0800004053E+02 | -8.1775605055E+02 |
| 2 | 44 | 2.0495485475E+00 | 1.0850004053E+02 | -8.1775601965E+02 |
| 2 | 45 | 2.0495485475E+00 | 1.0900004053E+02 | -8.1775598673E+02 |
| 2 | 46 | 2.0495485475E+00 | 1.0950004053E+02 | -8.1775559652E+02 |
| 2 | 47 | 2.0495485475E+00 | 1.1000004053E+02 | -8.1775592565E+02 |
| 2 | 48 | 2.0495485475E+00 | 1.1050004053E+02 | -8.1775589430E+02 |
| 2 | 49 | 2.0495485475E+00 | 1.1100004053E+02 | -8.1775586324E+02 |

|   |    |                  |                  |                   |
|---|----|------------------|------------------|-------------------|
| 2 | 50 | 2.0495485475E+00 | 1.1150004053E+02 | -8.1775583406E+02 |
| 2 | 51 | 2.0495485475E+00 | 1.1200004053E+02 | -8.1775580442E+02 |
| 2 | 52 | 2.0495485475E+00 | 1.1250004053E+02 | -8.1775577454E+02 |
| 2 | 53 | 2.0495485475E+00 | 1.1300004053E+02 | -8.1775574484E+02 |
| 2 | 54 | 2.0495485475E+00 | 1.1350004053E+02 | -8.1775571487E+02 |
| 2 | 55 | 2.0495485475E+00 | 1.1400004053E+02 | -8.1775568648E+02 |
| 2 | 56 | 2.0495485475E+00 | 1.1450004053E+02 | -8.1775563946E+02 |
| 2 | 57 | 2.0495485475E+00 | 1.1500004053E+02 | -8.1775558437E+02 |
| 2 | 58 | 2.0495485475E+00 | 1.1550004053E+02 | -8.1775558268E+02 |
| 2 | 59 | 2.0495485475E+00 | 1.1600004053E+02 | -8.1775555387E+02 |
| 2 | 60 | 2.0495485475E+00 | 1.1650004053E+02 | -8.1775521191E+02 |
| 2 | 61 | 2.0495485475E+00 | 1.1700004053E+02 | -8.1775549546E+02 |
| 3 | 1  | 2.0595485475E+00 | 8.7000040532E+01 | -8.1775756329E+02 |
| 3 | 2  | 2.0595485475E+00 | 8.7500040532E+01 | -8.1775755195E+02 |
| 3 | 3  | 2.0595485475E+00 | 8.8000040532E+01 | -8.1775761164E+02 |
| 3 | 4  | 2.0595485475E+00 | 8.8500040532E+01 | -8.1775762818E+02 |
| 3 | 5  | 2.0595485475E+00 | 8.9000040532E+01 | -8.1775763651E+02 |
| 3 | 6  | 2.0595485475E+00 | 8.9500040532E+01 | -8.1775765620E+02 |
| 3 | 7  | 2.0595485475E+00 | 9.0000040532E+01 | -8.1775766657E+02 |
| 3 | 8  | 2.0595485475E+00 | 9.0500040532E+01 | -8.1775767057E+02 |
| 3 | 9  | 2.0595485475E+00 | 9.1000040532E+01 | -8.1775767111E+02 |
| 3 | 10 | 2.0595485475E+00 | 9.1500040532E+01 | -8.1775767184E+02 |
| 3 | 11 | 2.0595485475E+00 | 9.2000040532E+01 | -8.1775766932E+02 |
| 3 | 12 | 2.0595485475E+00 | 9.2500040532E+01 | -8.1775746633E+02 |
| 3 | 13 | 2.0595485475E+00 | 9.3000040532E+01 | -8.1775765489E+02 |
| 3 | 14 | 2.0595485475E+00 | 9.3500040532E+01 | -8.1775761414E+02 |
| 3 | 15 | 2.0595485475E+00 | 9.4000040532E+01 | -8.1775763171E+02 |
| 3 | 16 | 2.0595485475E+00 | 9.4500040532E+01 | -8.1775757752E+02 |
| 3 | 17 | 2.0595485475E+00 | 9.5000040532E+01 | -8.1775759790E+02 |
| 3 | 18 | 2.0595485475E+00 | 9.5500040532E+01 | -8.1775754639E+02 |
| 3 | 19 | 2.0595485475E+00 | 9.6000040532E+01 | -8.1775755759E+02 |
| 3 | 20 | 2.0595485475E+00 | 9.6500040532E+01 | -8.1775745694E+02 |
| 3 | 21 | 2.0595485475E+00 | 9.7000040532E+01 | -8.1775749710E+02 |
| 3 | 22 | 2.0595485475E+00 | 9.7500040532E+01 | -8.1775744886E+02 |
| 3 | 23 | 2.0595485475E+00 | 9.8000040532E+01 | -8.1775738993E+02 |
| 3 | 24 | 2.0595485475E+00 | 9.8500040532E+01 | -8.1775614146E+02 |
| 3 | 25 | 2.0595485475E+00 | 9.9000040532E+01 | -8.1775736298E+02 |
| 3 | 26 | 2.0595485475E+00 | 9.9500040532E+01 | -8.1775733694E+02 |
| 3 | 27 | 2.0595485475E+00 | 1.0000004053E+02 | -8.1775730705E+02 |
| 3 | 28 | 2.0595485475E+00 | 1.0050004053E+02 | -8.1775728437E+02 |
| 3 | 29 | 2.0595485475E+00 | 1.0100004053E+02 | -8.1775727197E+02 |
| 3 | 30 | 2.0595485475E+00 | 1.0150004053E+02 | -8.1775723648E+02 |
| 3 | 31 | 2.0595485475E+00 | 1.0200004053E+02 | -8.1775716344E+02 |
| 3 | 32 | 2.0595485475E+00 | 1.0250004053E+02 | -8.1775716392E+02 |
| 3 | 33 | 2.0595485475E+00 | 1.0300004053E+02 | -8.1775710539E+02 |
| 3 | 34 | 2.0595485475E+00 | 1.0350004053E+02 | -8.1775708549E+02 |
| 3 | 35 | 2.0595485475E+00 | 1.0400004053E+02 | -8.1775698616E+02 |
| 3 | 36 | 2.0595485475E+00 | 1.0450004053E+02 | -8.1775702617E+02 |
| 3 | 37 | 2.0595485475E+00 | 1.0500004053E+02 | -8.1775698746E+02 |
| 3 | 38 | 2.0595485475E+00 | 1.0550004053E+02 | -8.1775694602E+02 |
| 3 | 39 | 2.0595485475E+00 | 1.0600004053E+02 | -8.1775691693E+02 |
| 3 | 40 | 2.0595485475E+00 | 1.0650004053E+02 | -8.1775688258E+02 |



|      |                  |                  |                   |
|------|------------------|------------------|-------------------|
| 3 41 | 2.0595485475E+00 | 1.0700004053E+02 | -8.1775684894E+02 |
| 3 42 | 2.0595485475E+00 | 1.0750004053E+02 | -8.1775659675E+02 |
| 3 43 | 2.0595485475E+00 | 1.0800004053E+02 | -8.1775678530E+02 |
| 3 44 | 2.0595485475E+00 | 1.0850004053E+02 | -8.1775675459E+02 |
| 3 45 | 2.0595485475E+00 | 1.0900004053E+02 | -8.1775672340E+02 |
| 3 46 | 2.0595485475E+00 | 1.0950004053E+02 | -8.1775669191E+02 |
| 3 47 | 2.0595485475E+00 | 1.1000004053E+02 | -8.1775666021E+02 |
| 3 48 | 2.0595485475E+00 | 1.1050004053E+02 | -8.1775663377E+02 |
| 3 49 | 2.0595485475E+00 | 1.1100004053E+02 | -8.1775660206E+02 |
| 3 50 | 2.0595485475E+00 | 1.1150004053E+02 | -8.1775657223E+02 |
| 3 51 | 2.0595485475E+00 | 1.1200004053E+02 | -8.1775654180E+02 |
| 3 52 | 2.0595485475E+00 | 1.1250004053E+02 | -8.1775651313E+02 |
| 3 53 | 2.0595485475E+00 | 1.1300004053E+02 | -8.1775648208E+02 |
| 3 54 | 2.0595485475E+00 | 1.1350004053E+02 | -8.1775615589E+02 |
| 3 55 | 2.0595485475E+00 | 1.1400004053E+02 | -8.1775642423E+02 |
| 3 56 | 2.0595485475E+00 | 1.1450004053E+02 | -8.1775637843E+02 |
| 3 57 | 2.0595485475E+00 | 1.1500004053E+02 | -8.1775635016E+02 |
| 3 58 | 2.0595485475E+00 | 1.1550004053E+02 | -8.1775632190E+02 |
| 3 59 | 2.0595485475E+00 | 1.1600004053E+02 | -8.1775629288E+02 |
| 3 60 | 2.0595485475E+00 | 1.1650004053E+02 | -8.1775626371E+02 |
| 3 61 | 2.0595485475E+00 | 1.1700004053E+02 | -8.1775623420E+02 |
| 4 1  | 2.0695485475E+00 | 8.7000040532E+01 | -8.1775823751E+02 |
| 4 2  | 2.0695485475E+00 | 8.7500040532E+01 | -8.1775826236E+02 |
| 4 3  | 2.0695485475E+00 | 8.8000040532E+01 | -8.1775829256E+02 |
| 4 4  | 2.0695485475E+00 | 8.8500040532E+01 | -8.1775830474E+02 |
| 4 5  | 2.0695485475E+00 | 8.9000040532E+01 | -8.1775832408E+02 |
| 4 6  | 2.0695485475E+00 | 8.9500040532E+01 | -8.1775830616E+02 |
| 4 7  | 2.0695485475E+00 | 9.0000040532E+01 | -8.1775823953E+02 |
| 4 8  | 2.0695485475E+00 | 9.0500040532E+01 | -8.1775834629E+02 |
| 4 9  | 2.0695485475E+00 | 9.1000040532E+01 | -8.1775834928E+02 |
| 4 10 | 2.0695485475E+00 | 9.1500040532E+01 | -8.1775834868E+02 |
| 4 11 | 2.0695485475E+00 | 9.2000040532E+01 | -8.1775834531E+02 |
| 4 12 | 2.0695485475E+00 | 9.2500040532E+01 | -8.1775830725E+02 |
| 4 13 | 2.0695485475E+00 | 9.3000040532E+01 | -8.1775799543E+02 |
| 4 14 | 2.0695485475E+00 | 9.3500040532E+01 | -8.1775828812E+02 |
| 4 15 | 2.0695485475E+00 | 9.4000040532E+01 | -8.1775713464E+02 |
| 4 16 | 2.0695485475E+00 | 9.4500040532E+01 | -8.1775825718E+02 |
| 4 17 | 2.0695485475E+00 | 9.5000040532E+01 | -8.1775827039E+02 |
| 4 18 | 2.0695485475E+00 | 9.5500040532E+01 | -8.1775821955E+02 |
| 4 19 | 2.0695485475E+00 | 9.6000040532E+01 | -8.1775794810E+02 |
| 4 20 | 2.0695485475E+00 | 9.6500040532E+01 | -8.1775816908E+02 |
| 4 21 | 2.0695485475E+00 | 9.7000040532E+01 | -8.1775816954E+02 |
| 4 22 | 2.0695485475E+00 | 9.7500040532E+01 | -8.1775812325E+02 |
| 4 23 | 2.0695485475E+00 | 9.8000040532E+01 | -8.1775809239E+02 |
| 4 24 | 2.0695485475E+00 | 9.8500040532E+01 | -8.1775806631E+02 |
| 4 25 | 2.0695485475E+00 | 9.9000040532E+01 | -8.1775796167E+02 |
| 4 26 | 2.0695485475E+00 | 9.9500040532E+01 | -8.1775801430E+02 |
| 4 27 | 2.0695485475E+00 | 1.0000004053E+02 | -8.1775795176E+02 |
| 4 28 | 2.0695485475E+00 | 1.0050004053E+02 | -8.1775795326E+02 |
| 4 29 | 2.0695485475E+00 | 1.0100004053E+02 | -8.1775767062E+02 |
| 4 30 | 2.0695485475E+00 | 1.0150004053E+02 | -8.1775776218E+02 |
| 4 31 | 2.0695485475E+00 | 1.0200004053E+02 | -8.1775787518E+02 |



|   |    |                  |                  |                   |
|---|----|------------------|------------------|-------------------|
| 4 | 32 | 2.0695485475E+00 | 1.0250004053E+02 | -8.1775781816E+02 |
| 4 | 33 | 2.0695485475E+00 | 1.0300004053E+02 | -8.1775723167E+02 |
| 4 | 34 | 2.0695485475E+00 | 1.0350004053E+02 | -8.1775775315E+02 |
| 4 | 35 | 2.0695485475E+00 | 1.0400004053E+02 | -8.1775771458E+02 |
| 4 | 36 | 2.0695485475E+00 | 1.0450004053E+02 | -8.1775765230E+02 |
| 4 | 37 | 2.0695485475E+00 | 1.0500004053E+02 | -8.1775765569E+02 |
| 4 | 38 | 2.0695485475E+00 | 1.0550004053E+02 | -8.1775759887E+02 |
| 4 | 39 | 2.0695485475E+00 | 1.0600004053E+02 | -8.1775758434E+02 |
| 4 | 40 | 2.0695485475E+00 | 1.0650004053E+02 | -8.1775754998E+02 |
| 4 | 41 | 2.0695485475E+00 | 1.0700004053E+02 | -8.1775751738E+02 |
| 4 | 42 | 2.0695485475E+00 | 1.0750004053E+02 | -8.1775748512E+02 |
| 4 | 43 | 2.0695485475E+00 | 1.0800004053E+02 | -8.1775745373E+02 |
| 4 | 44 | 2.0695485475E+00 | 1.0850004053E+02 | -8.1775742288E+02 |
| 4 | 45 | 2.0695485475E+00 | 1.0900004053E+02 | -8.1775739184E+02 |
| 4 | 46 | 2.0695485475E+00 | 1.0950004053E+02 | -8.1775735928E+02 |
| 4 | 47 | 2.0695485475E+00 | 1.1000004053E+02 | -8.1775732758E+02 |
| 4 | 48 | 2.0695485475E+00 | 1.1050004053E+02 | -8.1775730628E+02 |
| 4 | 49 | 2.0695485475E+00 | 1.1100004053E+02 | -8.1775727441E+02 |
| 4 | 50 | 2.0695485475E+00 | 1.1150004053E+02 | -8.1775710026E+02 |
| 4 | 51 | 2.0695485475E+00 | 1.1200004053E+02 | -8.1775721386E+02 |
| 4 | 52 | 2.0695485475E+00 | 1.1250004053E+02 | -8.1775718429E+02 |
| 4 | 53 | 2.0695485475E+00 | 1.1300004053E+02 | -8.1775715384E+02 |
| 4 | 54 | 2.0695485475E+00 | 1.1350004053E+02 | -8.1775712251E+02 |
| 4 | 55 | 2.0695485475E+00 | 1.1400004053E+02 | -8.1775709489E+02 |
| 4 | 56 | 2.0695485475E+00 | 1.1450004053E+02 | -8.1775705163E+02 |
| 4 | 57 | 2.0695485475E+00 | 1.1500004053E+02 | -8.1775702326E+02 |
| 4 | 58 | 2.0695485475E+00 | 1.1550004053E+02 | -8.1775699445E+02 |
| 4 | 59 | 2.0695485475E+00 | 1.1600004053E+02 | -8.1775696549E+02 |
| 4 | 60 | 2.0695485475E+00 | 1.1650004053E+02 | -8.1775693624E+02 |
| 4 | 61 | 2.0695485475E+00 | 1.1700004053E+02 | -8.1775690639E+02 |
| 5 | 1  | 2.0795485475E+00 | 8.7000040532E+01 | -8.1775885604E+02 |
| 5 | 2  | 2.0795485475E+00 | 8.7500040532E+01 | -8.1775888108E+02 |
| 5 | 3  | 2.0795485475E+00 | 8.8000040532E+01 | -8.1775890410E+02 |
| 5 | 4  | 2.0795485475E+00 | 8.8500040532E+01 | -8.1775891803E+02 |
| 5 | 5  | 2.0795485475E+00 | 8.9000040532E+01 | -8.1775893295E+02 |
| 5 | 6  | 2.0795485475E+00 | 8.9500040532E+01 | -8.1775894114E+02 |
| 5 | 7  | 2.0795485475E+00 | 9.0000040532E+01 | -8.1775895039E+02 |
| 5 | 8  | 2.0795485475E+00 | 9.0500040532E+01 | -8.1775896079E+02 |
| 5 | 9  | 2.0795485475E+00 | 9.1000040532E+01 | -8.1775896107E+02 |
| 5 | 10 | 2.0795485475E+00 | 9.1500040532E+01 | -8.1775897982E+02 |
| 5 | 11 | 2.0795485475E+00 | 9.2000040532E+01 | -8.1775893820E+02 |
| 5 | 12 | 2.0795485475E+00 | 9.2500040532E+01 | -8.1775890697E+02 |
| 5 | 13 | 2.0795485475E+00 | 9.3000040532E+01 | -8.1775893795E+02 |
| 5 | 14 | 2.0795485475E+00 | 9.3500040532E+01 | -8.1775889758E+02 |
| 5 | 15 | 2.0795485475E+00 | 9.4000040532E+01 | -8.1775891302E+02 |
| 5 | 16 | 2.0795485475E+00 | 9.4500040532E+01 | -8.1775886511E+02 |
| 5 | 17 | 2.0795485475E+00 | 9.5000040532E+01 | -8.1775887735E+02 |
| 5 | 18 | 2.0795485475E+00 | 9.5500040532E+01 | -8.1775833549E+02 |
| 5 | 19 | 2.0795485475E+00 | 9.6000040532E+01 | -8.1775883674E+02 |
| 5 | 20 | 2.0795485475E+00 | 9.6500040532E+01 | -8.1775877396E+02 |
| 5 | 21 | 2.0795485475E+00 | 9.7000040532E+01 | -8.1775878510E+02 |
| 5 | 22 | 2.0795485475E+00 | 9.7500040532E+01 | -8.1775872832E+02 |

|   |    |                  |                  |                   |
|---|----|------------------|------------------|-------------------|
| 5 | 23 | 2.0795485475E+00 | 9.8000040532E+01 | -8.1775870504E+02 |
| 5 | 24 | 2.0795485475E+00 | 9.8500040532E+01 | -8.1775866661E+02 |
| 5 | 25 | 2.0795485475E+00 | 9.9000040532E+01 | -8.1775831232E+02 |
| 5 | 26 | 2.0795485475E+00 | 9.9500040532E+01 | -8.1775862209E+02 |
| 5 | 27 | 2.0795485475E+00 | 1.0000004053E+02 | -8.1775855904E+02 |
| 5 | 28 | 2.0795485475E+00 | 1.0050004053E+02 | -8.1775817907E+02 |
| 5 | 29 | 2.0795485475E+00 | 1.0100004053E+02 | -8.1775852869E+02 |
| 5 | 30 | 2.0795485475E+00 | 1.0150004053E+02 | -8.1775841916E+02 |
| 5 | 31 | 2.0795485475E+00 | 1.0200004053E+02 | -8.1775845749E+02 |
| 5 | 32 | 2.0795485475E+00 | 1.0250004053E+02 | -8.1775839139E+02 |
| 5 | 33 | 2.0795485475E+00 | 1.0300004053E+02 | -8.1775810085E+02 |
| 5 | 34 | 2.0795485475E+00 | 1.0350004053E+02 | -8.1775785224E+02 |
| 5 | 35 | 2.0795485475E+00 | 1.0400004053E+02 | -8.1775824642E+02 |
| 5 | 36 | 2.0795485475E+00 | 1.0450004053E+02 | -8.1775824562E+02 |
| 5 | 37 | 2.0795485475E+00 | 1.0500004053E+02 | -8.1775825816E+02 |
| 5 | 38 | 2.0795485475E+00 | 1.0550004053E+02 | -8.1775817808E+02 |
| 5 | 39 | 2.0795485475E+00 | 1.0600004053E+02 | -8.1775818820E+02 |
| 5 | 40 | 2.0795485475E+00 | 1.0650004053E+02 | -8.1775813020E+02 |
| 5 | 41 | 2.0795485475E+00 | 1.0700004053E+02 | -8.1775812169E+02 |
| 5 | 42 | 2.0795485475E+00 | 1.0750004053E+02 | -8.1775808959E+02 |
| 5 | 43 | 2.0795485475E+00 | 1.0800004053E+02 | -8.1775805833E+02 |
| 5 | 44 | 2.0795485475E+00 | 1.0850004053E+02 | -8.1775802704E+02 |
| 5 | 45 | 2.0795485475E+00 | 1.0900004053E+02 | -8.1775799562E+02 |
| 5 | 46 | 2.0795485475E+00 | 1.0950004053E+02 | -8.1775796356E+02 |
| 5 | 47 | 2.0795485475E+00 | 1.1000004053E+02 | -8.1775793075E+02 |
| 5 | 48 | 2.0795485475E+00 | 1.1050004053E+02 | -8.1775791550E+02 |
| 5 | 49 | 2.0795485475E+00 | 1.1100004053E+02 | -8.1775788186E+02 |
| 5 | 50 | 2.0795485475E+00 | 1.1150004053E+02 | -8.1775785251E+02 |
| 5 | 51 | 2.0795485475E+00 | 1.1200004053E+02 | -8.1775782215E+02 |
| 5 | 52 | 2.0795485475E+00 | 1.1250004053E+02 | -8.1775779195E+02 |
| 5 | 53 | 2.0795485475E+00 | 1.1300004053E+02 | -8.1775776100E+02 |
| 5 | 54 | 2.0795485475E+00 | 1.1350004053E+02 | -8.1775770985E+02 |
| 5 | 55 | 2.0795485475E+00 | 1.1400004053E+02 | -8.1775770163E+02 |
| 5 | 56 | 2.0795485475E+00 | 1.1450004053E+02 | -8.1775766105E+02 |
| 5 | 57 | 2.0795485475E+00 | 1.1500004053E+02 | -8.1775763223E+02 |
| 5 | 58 | 2.0795485475E+00 | 1.1550004053E+02 | -8.1775760345E+02 |
| 5 | 59 | 2.0795485475E+00 | 1.1600004053E+02 | -8.1775757400E+02 |
| 5 | 60 | 2.0795485475E+00 | 1.1650004053E+02 | -8.1775754479E+02 |
| 5 | 61 | 2.0795485475E+00 | 1.1700004053E+02 | -8.1775751475E+02 |
| 6 | 1  | 2.0895485475E+00 | 8.7000040532E+01 | -8.1775940539E+02 |
| 6 | 2  | 2.0895485475E+00 | 8.7500040532E+01 | -8.1775943362E+02 |
| 6 | 3  | 2.0895485475E+00 | 8.8000040532E+01 | -8.1775945301E+02 |
| 6 | 4  | 2.0895485475E+00 | 8.8500040532E+01 | -8.1775947331E+02 |
| 6 | 5  | 2.0895485475E+00 | 8.9000040532E+01 | -8.1775948884E+02 |
| 6 | 6  | 2.0895485475E+00 | 8.9500040532E+01 | -8.1775949428E+02 |
| 6 | 7  | 2.0895485475E+00 | 9.0000040532E+01 | -8.1775941744E+02 |
| 6 | 8  | 2.0895485475E+00 | 9.0500040532E+01 | -8.1775950998E+02 |
| 6 | 9  | 2.0895485475E+00 | 9.1000040532E+01 | -8.1775950833E+02 |
| 6 | 10 | 2.0895485475E+00 | 9.1500040532E+01 | -8.1775947716E+02 |
| 6 | 11 | 2.0895485475E+00 | 9.2000040532E+01 | -8.1775950308E+02 |
| 6 | 12 | 2.0895485475E+00 | 9.2500040532E+01 | -8.1775947307E+02 |
| 6 | 13 | 2.0895485475E+00 | 9.3000040532E+01 | -8.1775948783E+02 |

|   |    |                  |                  |                   |
|---|----|------------------|------------------|-------------------|
| 6 | 14 | 2.0895485475E+00 | 9.3500040532E+01 | -8.1775945100E+02 |
| 6 | 15 | 2.0895485475E+00 | 9.4000040532E+01 | -8.1775946105E+02 |
| 6 | 16 | 2.0895485475E+00 | 9.4500040532E+01 | -8.1775941489E+02 |
| 6 | 17 | 2.0895485475E+00 | 9.5000040532E+01 | -8.1775942571E+02 |
| 6 | 18 | 2.0895485475E+00 | 9.5500040532E+01 | -8.1775936050E+02 |
| 6 | 19 | 2.0895485475E+00 | 9.6000040532E+01 | -8.1775938461E+02 |
| 6 | 20 | 2.0895485475E+00 | 9.6500040532E+01 | -8.1775932989E+02 |
| 6 | 21 | 2.0895485475E+00 | 9.7000040532E+01 | -8.1775933603E+02 |
| 6 | 22 | 2.0895485475E+00 | 9.7500040532E+01 | -8.1775927956E+02 |
| 6 | 23 | 2.0895485475E+00 | 9.8000040532E+01 | -8.1775925041E+02 |
| 6 | 24 | 2.0895485475E+00 | 9.8500040532E+01 | -8.1775922585E+02 |
| 6 | 25 | 2.0895485475E+00 | 9.9000040532E+01 | -8.1775919753E+02 |
| 6 | 26 | 2.0895485475E+00 | 9.9500040532E+01 | -8.1775917448E+02 |
| 6 | 27 | 2.0895485475E+00 | 1.0000004053E+02 | -8.1775914438E+02 |
| 6 | 28 | 2.0895485475E+00 | 1.0050004053E+02 | -8.1775877894E+02 |
| 6 | 29 | 2.0895485475E+00 | 1.0100004053E+02 | -8.1775906397E+02 |
| 6 | 30 | 2.0895485475E+00 | 1.0150004053E+02 | -8.1775904994E+02 |
| 6 | 31 | 2.0895485475E+00 | 1.0200004053E+02 | -8.1775902805E+02 |
| 6 | 32 | 2.0895485475E+00 | 1.0250004053E+02 | -8.1775898913E+02 |
| 6 | 33 | 2.0895485475E+00 | 1.0300004053E+02 | -8.1775893764E+02 |
| 6 | 34 | 2.0895485475E+00 | 1.0350004053E+02 | -8.1775891394E+02 |
| 6 | 35 | 2.0895485475E+00 | 1.0400004053E+02 | -8.1775885192E+02 |
| 6 | 36 | 2.0895485475E+00 | 1.0450004053E+02 | -8.1775883459E+02 |
| 6 | 37 | 2.0895485475E+00 | 1.0500004053E+02 | -8.1775880055E+02 |
| 6 | 38 | 2.0895485475E+00 | 1.0550004053E+02 | -8.1775875173E+02 |
| 6 | 39 | 2.0895485475E+00 | 1.0600004053E+02 | -8.1775873112E+02 |
| 6 | 40 | 2.0895485475E+00 | 1.0650004053E+02 | -8.1775867390E+02 |
| 6 | 41 | 2.0895485475E+00 | 1.0700004053E+02 | -8.1775866492E+02 |
| 6 | 42 | 2.0895485475E+00 | 1.0750004053E+02 | -8.1775863312E+02 |
| 6 | 43 | 2.0895485475E+00 | 1.0800004053E+02 | -8.1775860178E+02 |
| 6 | 44 | 2.0895485475E+00 | 1.0850004053E+02 | -8.1775857045E+02 |
| 6 | 45 | 2.0895485475E+00 | 1.0900004053E+02 | -8.1775853869E+02 |
| 6 | 46 | 2.0895485475E+00 | 1.0950004053E+02 | -8.1775850631E+02 |
| 6 | 47 | 2.0895485475E+00 | 1.1000004053E+02 | -8.1775847311E+02 |
| 6 | 48 | 2.0895485475E+00 | 1.1050004053E+02 | -8.1775846255E+02 |
| 6 | 49 | 2.0895485475E+00 | 1.1100004053E+02 | -8.1775843137E+02 |
| 6 | 50 | 2.0895485475E+00 | 1.1150004053E+02 | -8.1775840018E+02 |
| 6 | 51 | 2.0895485475E+00 | 1.1200004053E+02 | -8.1775836895E+02 |
| 6 | 52 | 2.0895485475E+00 | 1.1250004053E+02 | -8.1775833861E+02 |
| 6 | 53 | 2.0895485475E+00 | 1.1300004053E+02 | -8.1775830799E+02 |
| 6 | 54 | 2.0895485475E+00 | 1.1350004053E+02 | -8.1775823359E+02 |
| 6 | 55 | 2.0895485475E+00 | 1.1400004053E+02 | -8.1775824700E+02 |
| 6 | 56 | 2.0895485475E+00 | 1.1450004053E+02 | -8.1775820935E+02 |
| 6 | 57 | 2.0895485475E+00 | 1.1500004053E+02 | -8.1775818035E+02 |
| 6 | 58 | 2.0895485475E+00 | 1.1550004053E+02 | -8.1775815145E+02 |
| 6 | 59 | 2.0895485475E+00 | 1.1600004053E+02 | -8.1775730988E+02 |
| 6 | 60 | 2.0895485475E+00 | 1.1650004053E+02 | -8.1775809257E+02 |
| 6 | 61 | 2.0895485475E+00 | 1.1700004053E+02 | -8.1775806249E+02 |
| 7 | 1  | 2.0995485475E+00 | 8.7000040532E+01 | -8.1775990602E+02 |
| 7 | 2  | 2.0995485475E+00 | 8.7500040532E+01 | -8.1775992832E+02 |
| 7 | 3  | 2.0995485475E+00 | 8.8000040532E+01 | -8.1775995108E+02 |
| 7 | 4  | 2.0995485475E+00 | 8.8500040532E+01 | -8.1775996390E+02 |

|      |                  |                  |                   |
|------|------------------|------------------|-------------------|
| 7 5  | 2.0995485475E+00 | 8.9000040532E+01 | -8.1775995208E+02 |
| 7 6  | 2.0995485475E+00 | 8.9500040532E+01 | -8.1775999138E+02 |
| 7 7  | 2.0995485475E+00 | 9.0000040532E+01 | -8.1775999843E+02 |
| 7 8  | 2.0995485475E+00 | 9.0500040532E+01 | -8.1776000196E+02 |
| 7 9  | 2.0995485475E+00 | 9.1000040532E+01 | -8.1776000317E+02 |
| 7 10 | 2.0995485475E+00 | 9.1500040532E+01 | -8.1775996630E+02 |
| 7 11 | 2.0995485475E+00 | 9.2000040532E+01 | -8.1775999616E+02 |
| 7 12 | 2.0995485475E+00 | 9.2500040532E+01 | -8.1775973347E+02 |
| 7 13 | 2.0995485475E+00 | 9.3000040532E+01 | -8.1775997864E+02 |
| 7 14 | 2.0995485475E+00 | 9.3500040532E+01 | -8.1775994189E+02 |
| 7 15 | 2.0995485475E+00 | 9.4000040532E+01 | -8.1775995083E+02 |
| 7 16 | 2.0995485475E+00 | 9.4500040532E+01 | -8.1775991145E+02 |
| 7 17 | 2.0995485475E+00 | 9.5000040532E+01 | -8.1775991521E+02 |
| 7 18 | 2.0995485475E+00 | 9.5500040532E+01 | -8.1775983375E+02 |
| 7 19 | 2.0995485475E+00 | 9.6000040532E+01 | -8.1775987258E+02 |
| 7 20 | 2.0995485475E+00 | 9.6500040532E+01 | -8.1775967229E+02 |
| 7 21 | 2.0995485475E+00 | 9.7000040532E+01 | -8.1775982407E+02 |
| 7 22 | 2.0995485475E+00 | 9.7500040532E+01 | -8.1775976957E+02 |
| 7 23 | 2.0995485475E+00 | 9.8000040532E+01 | -8.1775973745E+02 |
| 7 24 | 2.0995485475E+00 | 9.8500040532E+01 | -8.1775971722E+02 |
| 7 25 | 2.0995485475E+00 | 9.9000040532E+01 | -8.1775905088E+02 |
| 7 26 | 2.0995485475E+00 | 9.9500040532E+01 | -8.1775966217E+02 |
| 7 27 | 2.0995485475E+00 | 1.000004053E+02  | -8.1775961345E+02 |
| 7 28 | 2.0995485475E+00 | 1.0050004053E+02 | -8.1775960553E+02 |
| 7 29 | 2.0995485475E+00 | 1.0100004053E+02 | -8.1775958222E+02 |
| 7 30 | 2.0995485475E+00 | 1.0150004053E+02 | -8.1775954415E+02 |
| 7 31 | 2.0995485475E+00 | 1.0200004053E+02 | -8.1775950412E+02 |
| 7 32 | 2.0995485475E+00 | 1.0250004053E+02 | -8.1775947441E+02 |
| 7 33 | 2.0995485475E+00 | 1.0300004053E+02 | -8.1775944160E+02 |
| 7 34 | 2.0995485475E+00 | 1.0350004053E+02 | -8.1775937921E+02 |
| 7 35 | 2.0995485475E+00 | 1.0400004053E+02 | -8.1775936606E+02 |
| 7 36 | 2.0995485475E+00 | 1.0450004053E+02 | -8.1775931327E+02 |
| 7 37 | 2.0995485475E+00 | 1.0500004053E+02 | -8.1775928506E+02 |
| 7 38 | 2.0995485475E+00 | 1.0550004053E+02 | -8.1775923856E+02 |
| 7 39 | 2.0995485475E+00 | 1.0600004053E+02 | -8.1775921581E+02 |
| 7 40 | 2.0995485475E+00 | 1.0650004053E+02 | -8.1775915975E+02 |
| 7 41 | 2.0995485475E+00 | 1.0700004053E+02 | -8.1775915004E+02 |
| 7 42 | 2.0995485475E+00 | 1.0750004053E+02 | -8.1775907575E+02 |
| 7 43 | 2.0995485475E+00 | 1.0800004053E+02 | -8.1775908694E+02 |
| 7 44 | 2.0995485475E+00 | 1.0850004053E+02 | -8.1775905555E+02 |
| 7 45 | 2.0995485475E+00 | 1.0900004053E+02 | -8.1775902308E+02 |
| 7 46 | 2.0995485475E+00 | 1.0950004053E+02 | -8.1775898672E+02 |
| 7 47 | 2.0995485475E+00 | 1.1000004053E+02 | -8.1775895685E+02 |
| 7 48 | 2.0995485475E+00 | 1.1050004053E+02 | -8.1775895241E+02 |
| 7 49 | 2.0995485475E+00 | 1.1100004053E+02 | -8.1775892102E+02 |
| 7 50 | 2.0995485475E+00 | 1.1150004053E+02 | -8.1775888937E+02 |
| 7 51 | 2.0995485475E+00 | 1.1200004053E+02 | -8.1775885803E+02 |
| 7 52 | 2.0995485475E+00 | 1.1250004053E+02 | -8.1775882726E+02 |
| 7 53 | 2.0995485475E+00 | 1.1300004053E+02 | -8.1775879636E+02 |
| 7 54 | 2.0995485475E+00 | 1.1350004053E+02 | -8.1775875726E+02 |
| 7 55 | 2.0995485475E+00 | 1.1400004053E+02 | -8.1775873399E+02 |
| 7 56 | 2.0995485475E+00 | 1.1450004053E+02 | -8.1775869950E+02 |

|      |                  |                  |                   |
|------|------------------|------------------|-------------------|
| 7 57 | 2.0995485475E+00 | 1.1500004053E+02 | -8.1775867049E+02 |
| 7 58 | 2.0995485475E+00 | 1.1550004053E+02 | -8.1775864147E+02 |
| 7 59 | 2.0995485475E+00 | 1.1600004053E+02 | -8.1775861201E+02 |
| 7 60 | 2.0995485475E+00 | 1.1650004053E+02 | -8.1775858225E+02 |
| 7 61 | 2.0995485475E+00 | 1.1700004053E+02 | -8.1775855213E+02 |
| 8 1  | 2.1095485475E+00 | 8.7000040532E+01 | -8.1776034520E+02 |
| 8 2  | 2.1095485475E+00 | 8.7500040532E+01 | -8.1776036875E+02 |
| 8 3  | 2.1095485475E+00 | 8.8000040532E+01 | -8.1776038885E+02 |
| 8 4  | 2.1095485475E+00 | 8.8500040532E+01 | -8.1776040558E+02 |
| 8 5  | 2.1095485475E+00 | 8.9000040532E+01 | -8.1776041890E+02 |
| 8 6  | 2.1095485475E+00 | 8.9500040532E+01 | -8.1776041648E+02 |
| 8 7  | 2.1095485475E+00 | 9.0000040532E+01 | -8.1776043521E+02 |
| 8 8  | 2.1095485475E+00 | 9.0500040532E+01 | -8.1776041111E+02 |
| 8 9  | 2.1095485475E+00 | 9.1000040532E+01 | -8.1776043979E+02 |
| 8 10 | 2.1095485475E+00 | 9.1500040532E+01 | -8.1776041160E+02 |
| 8 11 | 2.1095485475E+00 | 9.2000040532E+01 | -8.1776043177E+02 |
| 8 12 | 2.1095485475E+00 | 9.2500040532E+01 | -8.1776039808E+02 |
| 8 13 | 2.1095485475E+00 | 9.3000040532E+01 | -8.1776041276E+02 |
| 8 14 | 2.1095485475E+00 | 9.3500040532E+01 | -8.1776037768E+02 |
| 8 15 | 2.1095485475E+00 | 9.4000040532E+01 | -8.1776038443E+02 |
| 8 16 | 2.1095485475E+00 | 9.4500040532E+01 | -8.1776034473E+02 |
| 8 17 | 2.1095485475E+00 | 9.5000040532E+01 | -8.1776034818E+02 |
| 8 18 | 2.1095485475E+00 | 9.5500040532E+01 | -8.1776030399E+02 |
| 8 19 | 2.1095485475E+00 | 9.6000040532E+01 | -8.1776030498E+02 |
| 8 20 | 2.1095485475E+00 | 9.6500040532E+01 | -8.1776025736E+02 |
| 8 21 | 2.1095485475E+00 | 9.7000040532E+01 | -8.1776025598E+02 |
| 8 22 | 2.1095485475E+00 | 9.7500040532E+01 | -8.1776020368E+02 |
| 8 23 | 2.1095485475E+00 | 9.8000040532E+01 | -8.1775891337E+02 |
| 8 24 | 2.1095485475E+00 | 9.8500040532E+01 | -8.1776015197E+02 |
| 8 25 | 2.1095485475E+00 | 9.9000040532E+01 | -8.1776012061E+02 |
| 8 26 | 2.1095485475E+00 | 9.9500040532E+01 | -8.1776009519E+02 |
| 8 27 | 2.1095485475E+00 | 1.0000004053E+02 | -8.1776007060E+02 |
| 8 28 | 2.1095485475E+00 | 1.0050004053E+02 | -8.1776004051E+02 |
| 8 29 | 2.1095485475E+00 | 1.0100004053E+02 | -8.1776001142E+02 |
| 8 30 | 2.1095485475E+00 | 1.0150004053E+02 | -8.1775997841E+02 |
| 8 31 | 2.1095485475E+00 | 1.0200004053E+02 | -8.1775992627E+02 |
| 8 32 | 2.1095485475E+00 | 1.0250004053E+02 | -8.1775965205E+02 |
| 8 33 | 2.1095485475E+00 | 1.0300004053E+02 | -8.1775987642E+02 |
| 8 34 | 2.1095485475E+00 | 1.0350004053E+02 | -8.1775983828E+02 |
| 8 35 | 2.1095485475E+00 | 1.0400004053E+02 | -8.1775977706E+02 |
| 8 36 | 2.1095485475E+00 | 1.0450004053E+02 | -8.1775975959E+02 |
| 8 37 | 2.1095485475E+00 | 1.0500004053E+02 | -8.1775971388E+02 |
| 8 38 | 2.1095485475E+00 | 1.0550004053E+02 | -8.1775967255E+02 |
| 8 39 | 2.1095485475E+00 | 1.0600004053E+02 | -8.1775964487E+02 |
| 8 40 | 2.1095485475E+00 | 1.0650004053E+02 | -8.1775958869E+02 |
| 8 41 | 2.1095485475E+00 | 1.0700004053E+02 | -8.1775957941E+02 |
| 8 42 | 2.1095485475E+00 | 1.0750004053E+02 | -8.1775951927E+02 |
| 8 43 | 2.1095485475E+00 | 1.0800004053E+02 | -8.1775951639E+02 |
| 8 44 | 2.1095485475E+00 | 1.0850004053E+02 | -8.1775945854E+02 |
| 8 45 | 2.1095485475E+00 | 1.0900004053E+02 | -8.1775945190E+02 |
| 8 46 | 2.1095485475E+00 | 1.0950004053E+02 | -8.1775938149E+02 |
| 8 47 | 2.1095485475E+00 | 1.1000004053E+02 | -8.1775938524E+02 |



|      |                  |                  |                   |
|------|------------------|------------------|-------------------|
| 8 48 | 2.1095485475E+00 | 1.1050004053E+02 | -8.1775938656E+02 |
| 8 49 | 2.1095485475E+00 | 1.1100004053E+02 | -8.1775935473E+02 |
| 8 50 | 2.1095485475E+00 | 1.1150004053E+02 | -8.1775932282E+02 |
| 8 51 | 2.1095485475E+00 | 1.1200004053E+02 | -8.1775929125E+02 |
| 8 52 | 2.1095485475E+00 | 1.1250004053E+02 | -8.1775926041E+02 |
| 8 53 | 2.1095485475E+00 | 1.1300004053E+02 | -8.1775922931E+02 |
| 8 54 | 2.1095485475E+00 | 1.1350004053E+02 | -8.1775919235E+02 |
| 8 55 | 2.1095485475E+00 | 1.1400004053E+02 | -8.1775916517E+02 |
| 8 56 | 2.1095485475E+00 | 1.1450004053E+02 | -8.1775913435E+02 |
| 8 57 | 2.1095485475E+00 | 1.1500004053E+02 | -8.1775910531E+02 |
| 8 58 | 2.1095485475E+00 | 1.1550004053E+02 | -8.1775907601E+02 |
| 8 59 | 2.1095485475E+00 | 1.1600004053E+02 | -8.1775904648E+02 |
| 8 60 | 2.1095485475E+00 | 1.1650004053E+02 | -8.1775901644E+02 |
| 8 61 | 2.1095485475E+00 | 1.1700004053E+02 | -8.1775898609E+02 |
| 9 1  | 2.1195485475E+00 | 8.7000040532E+01 | -8.1776073123E+02 |
| 9 2  | 2.1195485475E+00 | 8.7500040532E+01 | -8.1776075486E+02 |
| 9 3  | 2.1195485475E+00 | 8.8000040532E+01 | -8.1776077442E+02 |
| 9 4  | 2.1195485475E+00 | 8.8500040532E+01 | -8.1776079080E+02 |
| 9 5  | 2.1195485475E+00 | 8.9000040532E+01 | -8.1776080349E+02 |
| 9 6  | 2.1195485475E+00 | 8.9500040532E+01 | -8.1776076697E+02 |
| 9 7  | 2.1195485475E+00 | 9.0000040532E+01 | -8.1776081922E+02 |
| 9 8  | 2.1195485475E+00 | 9.0500040532E+01 | -8.1776079347E+02 |
| 9 9  | 2.1195485475E+00 | 9.1000040532E+01 | -8.1776082207E+02 |
| 9 10 | 2.1195485475E+00 | 9.1500040532E+01 | -8.1776079597E+02 |
| 9 11 | 2.1195485475E+00 | 9.2000040532E+01 | -8.1776081279E+02 |
| 9 12 | 2.1195485475E+00 | 9.2500040532E+01 | -8.1776078366E+02 |
| 9 13 | 2.1195485475E+00 | 9.3000040532E+01 | -8.1776079396E+02 |
| 9 14 | 2.1195485475E+00 | 9.3500040532E+01 | -8.1776076008E+02 |
| 9 15 | 2.1195485475E+00 | 9.4000040532E+01 | -8.1776076488E+02 |
| 9 16 | 2.1195485475E+00 | 9.4500040532E+01 | -8.1776072974E+02 |
| 9 17 | 2.1195485475E+00 | 9.5000040532E+01 | -8.1776072702E+02 |
| 9 18 | 2.1195485475E+00 | 9.5500040532E+01 | -8.1776068676E+02 |
| 9 19 | 2.1195485475E+00 | 9.6000040532E+01 | -8.1776068382E+02 |
| 9 20 | 2.1195485475E+00 | 9.6500040532E+01 | -8.1776063744E+02 |
| 9 21 | 2.1195485475E+00 | 9.7000040532E+01 | -8.1776063435E+02 |
| 9 22 | 2.1195485475E+00 | 9.7500040532E+01 | -8.1776058625E+02 |
| 9 23 | 2.1195485475E+00 | 9.8000040532E+01 | -8.1776056067E+02 |
| 9 24 | 2.1195485475E+00 | 9.8500040532E+01 | -8.1776053422E+02 |
| 9 25 | 2.1195485475E+00 | 9.9000040532E+01 | -8.1776050752E+02 |
| 9 26 | 2.1195485475E+00 | 9.9500040532E+01 | -8.1776047989E+02 |
| 9 27 | 2.1195485475E+00 | 1.0000004053E+02 | -8.1776045164E+02 |
| 9 28 | 2.1195485475E+00 | 1.0050004053E+02 | -8.1776042198E+02 |
| 9 29 | 2.1195485475E+00 | 1.0100004053E+02 | -8.1776038715E+02 |
| 9 30 | 2.1195485475E+00 | 1.0150004053E+02 | -8.1776035928E+02 |
| 9 31 | 2.1195485475E+00 | 1.0200004053E+02 | -8.1776031940E+02 |
| 9 32 | 2.1195485475E+00 | 1.0250004053E+02 | -8.1776029177E+02 |
| 9 33 | 2.1195485475E+00 | 1.0300004053E+02 | -8.1776025590E+02 |
| 9 34 | 2.1195485475E+00 | 1.0350004053E+02 | -8.1776021936E+02 |
| 9 35 | 2.1195485475E+00 | 1.0400004053E+02 | -8.1776018138E+02 |
| 9 36 | 2.1195485475E+00 | 1.0450004053E+02 | -8.1776013992E+02 |
| 9 37 | 2.1195485475E+00 | 1.0500004053E+02 | -8.1776008967E+02 |
| 9 38 | 2.1195485475E+00 | 1.0550004053E+02 | -8.1776005378E+02 |

|    |    |                  |                  |                   |
|----|----|------------------|------------------|-------------------|
| 9  | 39 | 2.1195485475E+00 | 1.0600004053E+02 | -8.1776002068E+02 |
| 9  | 40 | 2.1195485475E+00 | 1.0650004053E+02 | -8.1775996741E+02 |
| 9  | 41 | 2.1195485475E+00 | 1.0700004053E+02 | -8.1775995561E+02 |
| 9  | 42 | 2.1195485475E+00 | 1.0750004053E+02 | -8.1775989513E+02 |
| 9  | 43 | 2.1195485475E+00 | 1.0800004053E+02 | -8.1775989243E+02 |
| 9  | 44 | 2.1195485475E+00 | 1.0850004053E+02 | -8.1775982390E+02 |
| 9  | 45 | 2.1195485475E+00 | 1.0900004053E+02 | -8.1775982812E+02 |
| 9  | 46 | 2.1195485475E+00 | 1.0950004053E+02 | -8.1775972474E+02 |
| 9  | 47 | 2.1195485475E+00 | 1.1000004053E+02 | -8.1775976032E+02 |
| 9  | 48 | 2.1195485475E+00 | 1.1050004053E+02 | -8.1775976783E+02 |
| 9  | 49 | 2.1195485475E+00 | 1.1100004053E+02 | -8.1775973542E+02 |
| 9  | 50 | 2.1195485475E+00 | 1.1150004053E+02 | -8.1775970360E+02 |
| 9  | 51 | 2.1195485475E+00 | 1.1200004053E+02 | -8.1775967192E+02 |
| 9  | 52 | 2.1195485475E+00 | 1.1250004053E+02 | -8.1775963439E+02 |
| 9  | 53 | 2.1195485475E+00 | 1.1300004053E+02 | -8.1775960919E+02 |
| 9  | 54 | 2.1195485475E+00 | 1.1350004053E+02 | -8.1775957443E+02 |
| 9  | 55 | 2.1195485475E+00 | 1.1400004053E+02 | -8.1775954225E+02 |
| 9  | 56 | 2.1195485475E+00 | 1.1450004053E+02 | -8.1775951635E+02 |
| 9  | 57 | 2.1195485475E+00 | 1.1500004053E+02 | -8.1775948724E+02 |
| 9  | 58 | 2.1195485475E+00 | 1.1550004053E+02 | -8.1775945788E+02 |
| 9  | 59 | 2.1195485475E+00 | 1.1600004053E+02 | -8.1775942815E+02 |
| 9  | 60 | 2.1195485475E+00 | 1.1650004053E+02 | -8.1775939808E+02 |
| 9  | 61 | 2.1195485475E+00 | 1.1700004053E+02 | -8.1775936752E+02 |
| 10 | 1  | 2.1295485475E+00 | 8.7000040532E+01 | -8.1776106634E+02 |
| 10 | 2  | 2.1295485475E+00 | 8.7500040532E+01 | -8.1776109105E+02 |
| 10 | 3  | 2.1295485475E+00 | 8.8000040532E+01 | -8.1776110936E+02 |
| 10 | 4  | 2.1295485475E+00 | 8.8500040532E+01 | -8.1776112504E+02 |
| 10 | 5  | 2.1295485475E+00 | 8.9000040532E+01 | -8.1776113718E+02 |
| 10 | 6  | 2.1295485475E+00 | 8.9500040532E+01 | -8.1776112747E+02 |
| 10 | 7  | 2.1295485475E+00 | 9.0000040532E+01 | -8.1776115171E+02 |
| 10 | 8  | 2.1295485475E+00 | 9.0500040532E+01 | -8.1776113296E+02 |
| 10 | 9  | 2.1295485475E+00 | 9.1000040532E+01 | -8.1776115337E+02 |
| 10 | 10 | 2.1295485475E+00 | 9.1500040532E+01 | -8.1776113276E+02 |
| 10 | 11 | 2.1295485475E+00 | 9.2000040532E+01 | -8.1776114323E+02 |
| 10 | 12 | 2.1295485475E+00 | 9.2500040532E+01 | -8.1776111962E+02 |
| 10 | 13 | 2.1295485475E+00 | 9.3000040532E+01 | -8.1776112365E+02 |
| 10 | 14 | 2.1295485475E+00 | 9.3500040532E+01 | -8.1776081289E+02 |
| 10 | 15 | 2.1295485475E+00 | 9.4000040532E+01 | -8.1776109386E+02 |
| 10 | 16 | 2.1295485475E+00 | 9.4500040532E+01 | -8.1776106091E+02 |
| 10 | 17 | 2.1295485475E+00 | 9.5000040532E+01 | -8.1776105556E+02 |
| 10 | 18 | 2.1295485475E+00 | 9.5500040532E+01 | -8.1776101632E+02 |
| 10 | 19 | 2.1295485475E+00 | 9.6000040532E+01 | -8.1776101205E+02 |
| 10 | 20 | 2.1295485475E+00 | 9.6500040532E+01 | -8.1776096809E+02 |
| 10 | 21 | 2.1295485475E+00 | 9.7000040532E+01 | -8.1776096187E+02 |
| 10 | 22 | 2.1295485475E+00 | 9.7500040532E+01 | -8.1776091760E+02 |
| 10 | 23 | 2.1295485475E+00 | 9.8000040532E+01 | -8.1776089113E+02 |
| 10 | 24 | 2.1295485475E+00 | 9.8500040532E+01 | -8.1776086511E+02 |
| 10 | 25 | 2.1295485475E+00 | 9.9000040532E+01 | -8.1776083829E+02 |
| 10 | 26 | 2.1295485475E+00 | 9.9500040532E+01 | -8.1776081051E+02 |
| 10 | 27 | 2.1295485475E+00 | 1.0000004053E+02 | -8.1776078168E+02 |
| 10 | 28 | 2.1295485475E+00 | 1.0050004053E+02 | -8.1776075172E+02 |
| 10 | 29 | 2.1295485475E+00 | 1.0100004053E+02 | -8.1776071395E+02 |

|    |    |                  |                  |                   |
|----|----|------------------|------------------|-------------------|
| 10 | 30 | 2.1295485475E+00 | 1.0150004053E+02 | -8.1776068793E+02 |
| 10 | 31 | 2.1295485475E+00 | 1.0200004053E+02 | -8.1776064612E+02 |
| 10 | 32 | 2.1295485475E+00 | 1.0250004053E+02 | -8.1776061981E+02 |
| 10 | 33 | 2.1295485475E+00 | 1.0300004053E+02 | -8.1776058411E+02 |
| 10 | 34 | 2.1295485475E+00 | 1.0350004053E+02 | -8.1776054762E+02 |
| 10 | 35 | 2.1295485475E+00 | 1.0400004053E+02 | -8.1776050964E+02 |
| 10 | 36 | 2.1295485475E+00 | 1.0450004053E+02 | -8.1776046955E+02 |
| 10 | 37 | 2.1295485475E+00 | 1.0500004053E+02 | -8.1776041478E+02 |
| 10 | 38 | 2.1295485475E+00 | 1.0550004053E+02 | -8.1776038497E+02 |
| 10 | 39 | 2.1295485475E+00 | 1.0600004053E+02 | -8.1776034571E+02 |
| 10 | 40 | 2.1295485475E+00 | 1.0650004053E+02 | -8.1775970280E+02 |
| 10 | 41 | 2.1295485475E+00 | 1.0700004053E+02 | -8.1776028092E+02 |
| 10 | 42 | 2.1295485475E+00 | 1.0750004053E+02 | -8.1776021216E+02 |
| 10 | 43 | 2.1295485475E+00 | 1.0800004053E+02 | -8.1776021777E+02 |
| 10 | 44 | 2.1295485475E+00 | 1.0850004053E+02 | -8.1776015406E+02 |
| 10 | 45 | 2.1295485475E+00 | 1.0900004053E+02 | -8.1776015311E+02 |
| 10 | 46 | 2.1295485475E+00 | 1.0950004053E+02 | -8.1776006881E+02 |
| 10 | 47 | 2.1295485475E+00 | 1.1000004053E+02 | -8.1776008430E+02 |
| 10 | 48 | 2.1295485475E+00 | 1.1050004053E+02 | -8.1776009865E+02 |
| 10 | 49 | 2.1295485475E+00 | 1.1100004053E+02 | -8.1776006611E+02 |
| 10 | 50 | 2.1295485475E+00 | 1.1150004053E+02 | -8.1776003371E+02 |
| 10 | 51 | 2.1295485475E+00 | 1.1200004053E+02 | -8.1776000180E+02 |
| 10 | 52 | 2.1295485475E+00 | 1.1250004053E+02 | -8.1775996556E+02 |
| 10 | 53 | 2.1295485475E+00 | 1.1300004053E+02 | -8.1775993872E+02 |
| 10 | 54 | 2.1295485475E+00 | 1.1350004053E+02 | -8.1775990617E+02 |
| 10 | 55 | 2.1295485475E+00 | 1.1400004053E+02 | -8.1775986990E+02 |
| 10 | 56 | 2.1295485475E+00 | 1.1450004053E+02 | -8.1775984820E+02 |
| 10 | 57 | 2.1295485475E+00 | 1.1500004053E+02 | -8.1775981902E+02 |
| 10 | 58 | 2.1295485475E+00 | 1.1550004053E+02 | -8.1775978951E+02 |
| 10 | 59 | 2.1295485475E+00 | 1.1600004053E+02 | -8.1775975961E+02 |
| 10 | 60 | 2.1295485475E+00 | 1.1650004053E+02 | -8.1775972928E+02 |
| 10 | 61 | 2.1295485475E+00 | 1.1700004053E+02 | -8.1775969865E+02 |
| 11 | 1  | 2.1395485475E+00 | 8.7000040532E+01 | -8.1776135468E+02 |
| 11 | 2  | 2.1395485475E+00 | 8.7500040532E+01 | -8.1776137705E+02 |
| 11 | 3  | 2.1395485475E+00 | 8.8000040532E+01 | -8.1776139521E+02 |
| 11 | 4  | 2.1395485475E+00 | 8.8500040532E+01 | -8.1776139112E+02 |
| 11 | 5  | 2.1395485475E+00 | 8.9000040532E+01 | -8.1776142188E+02 |
| 11 | 6  | 2.1395485475E+00 | 8.9500040532E+01 | -8.1776141242E+02 |
| 11 | 7  | 2.1395485475E+00 | 9.0000040532E+01 | -8.1776143527E+02 |
| 11 | 8  | 2.1395485475E+00 | 9.0500040532E+01 | -8.1776142278E+02 |
| 11 | 9  | 2.1395485475E+00 | 9.1000040532E+01 | -8.1776143244E+02 |
| 11 | 10 | 2.1395485475E+00 | 9.1500040532E+01 | -8.1776141921E+02 |
| 11 | 11 | 2.1395485475E+00 | 9.2000040532E+01 | -8.1776142532E+02 |
| 11 | 12 | 2.1395485475E+00 | 9.2500040532E+01 | -8.1776140151E+02 |
| 11 | 13 | 2.1395485475E+00 | 9.3000040532E+01 | -8.1776140455E+02 |
| 11 | 14 | 2.1395485475E+00 | 9.3500040532E+01 | -8.1776137964E+02 |
| 11 | 15 | 2.1395485475E+00 | 9.4000040532E+01 | -8.1776137435E+02 |
| 11 | 16 | 2.1395485475E+00 | 9.4500040532E+01 | -8.1776134372E+02 |
| 11 | 17 | 2.1395485475E+00 | 9.5000040532E+01 | -8.1776133589E+02 |
| 11 | 18 | 2.1395485475E+00 | 9.5500040532E+01 | -8.1776130043E+02 |
| 11 | 19 | 2.1395485475E+00 | 9.6000040532E+01 | -8.1776129117E+02 |
| 11 | 20 | 2.1395485475E+00 | 9.6500040532E+01 | -8.1776125140E+02 |



|    |    |                  |                  |                   |
|----|----|------------------|------------------|-------------------|
| 11 | 21 | 2.1395485475E+00 | 9.7000040532E+01 | -8.1776124036E+02 |
| 11 | 22 | 2.1395485475E+00 | 9.7500040532E+01 | -8.1776119610E+02 |
| 11 | 23 | 2.1395485475E+00 | 9.8000040532E+01 | -8.1776117285E+02 |
| 11 | 24 | 2.1395485475E+00 | 9.8500040532E+01 | -8.1776114622E+02 |
| 11 | 25 | 2.1395485475E+00 | 9.9000040532E+01 | -8.1776111065E+02 |
| 11 | 26 | 2.1395485475E+00 | 9.9500040532E+01 | -8.1776109009E+02 |
| 11 | 27 | 2.1395485475E+00 | 1.0000004053E+02 | -8.1776106227E+02 |
| 11 | 28 | 2.1395485475E+00 | 1.0050004053E+02 | -8.1776103199E+02 |
| 11 | 29 | 2.1395485475E+00 | 1.0100004053E+02 | -8.1776099490E+02 |
| 11 | 30 | 2.1395485475E+00 | 1.0150004053E+02 | -8.1776096775E+02 |
| 11 | 31 | 2.1395485475E+00 | 1.0200004053E+02 | -8.1776092352E+02 |
| 11 | 32 | 2.1395485475E+00 | 1.0250004053E+02 | -8.1776089921E+02 |
| 11 | 33 | 2.1395485475E+00 | 1.0300004053E+02 | -8.1776086341E+02 |
| 11 | 34 | 2.1395485475E+00 | 1.0350004053E+02 | -8.1776082647E+02 |
| 11 | 35 | 2.1395485475E+00 | 1.0400004053E+02 | -8.1776078874E+02 |
| 11 | 36 | 2.1395485475E+00 | 1.0450004053E+02 | -8.1776074707E+02 |
| 11 | 37 | 2.1395485475E+00 | 1.0500004053E+02 | -8.1776069275E+02 |
| 11 | 38 | 2.1395485475E+00 | 1.0550004053E+02 | -8.1776066531E+02 |
| 11 | 39 | 2.1395485475E+00 | 1.0600004053E+02 | -8.1776062201E+02 |
| 11 | 40 | 2.1395485475E+00 | 1.0650004053E+02 | -8.1776052380E+02 |
| 11 | 41 | 2.1395485475E+00 | 1.0700004053E+02 | -8.1776055808E+02 |
| 11 | 42 | 2.1395485475E+00 | 1.0750004053E+02 | -8.1776048311E+02 |
| 11 | 43 | 2.1395485475E+00 | 1.0800004053E+02 | -8.1776049504E+02 |
| 11 | 44 | 2.1395485475E+00 | 1.0850004053E+02 | -8.1776042756E+02 |
| 11 | 45 | 2.1395485475E+00 | 1.0900004053E+02 | -8.1776042972E+02 |
| 11 | 46 | 2.1395485475E+00 | 1.0950004053E+02 | -8.1776034413E+02 |
| 11 | 47 | 2.1395485475E+00 | 1.1000004053E+02 | -8.1776036112E+02 |
| 11 | 48 | 2.1395485475E+00 | 1.1050004053E+02 | -8.1776038120E+02 |
| 11 | 49 | 2.1395485475E+00 | 1.1100004053E+02 | -8.1776034849E+02 |
| 11 | 50 | 2.1395485475E+00 | 1.1150004053E+02 | -8.1776031589E+02 |
| 11 | 51 | 2.1395485475E+00 | 1.1200004053E+02 | -8.1776028367E+02 |
| 11 | 52 | 2.1395485475E+00 | 1.1250004053E+02 | -8.1776024909E+02 |
| 11 | 53 | 2.1395485475E+00 | 1.1300004053E+02 | -8.1776022005E+02 |
| 11 | 54 | 2.1395485475E+00 | 1.1350004053E+02 | -8.1776019046E+02 |
| 11 | 55 | 2.1395485475E+00 | 1.1400004053E+02 | -8.1776014910E+02 |
| 11 | 56 | 2.1395485475E+00 | 1.1450004053E+02 | -8.1776013232E+02 |
| 11 | 57 | 2.1395485475E+00 | 1.1500004053E+02 | -8.1776010301E+02 |
| 11 | 58 | 2.1395485475E+00 | 1.1550004053E+02 | -8.1776007337E+02 |
| 11 | 59 | 2.1395485475E+00 | 1.1600004053E+02 | -8.1776004330E+02 |
| 11 | 60 | 2.1395485475E+00 | 1.1650004053E+02 | -8.1776001282E+02 |
| 11 | 61 | 2.1395485475E+00 | 1.1700004053E+02 | -8.1775998193E+02 |
| 12 | 1  | 2.1495485475E+00 | 8.7000040532E+01 | -8.1776159414E+02 |
| 12 | 2  | 2.1495485475E+00 | 8.7500040532E+01 | -8.1776159029E+02 |
| 12 | 3  | 2.1495485475E+00 | 8.8000040532E+01 | -8.1776163398E+02 |
| 12 | 4  | 2.1495485475E+00 | 8.8500040532E+01 | -8.1776163483E+02 |
| 12 | 5  | 2.1495485475E+00 | 8.9000040532E+01 | -8.1776165915E+02 |
| 12 | 6  | 2.1495485475E+00 | 8.9500040532E+01 | -8.1776165598E+02 |
| 12 | 7  | 2.1495485475E+00 | 9.0000040532E+01 | -8.1776167172E+02 |
| 12 | 8  | 2.1495485475E+00 | 9.0500040532E+01 | -8.1776165188E+02 |
| 12 | 9  | 2.1495485475E+00 | 9.1000040532E+01 | -8.1776167201E+02 |
| 12 | 10 | 2.1495485475E+00 | 9.1500040532E+01 | -8.1776165882E+02 |
| 12 | 11 | 2.1495485475E+00 | 9.2000040532E+01 | -8.1776166063E+02 |

|    |    |                  |                  |                   |
|----|----|------------------|------------------|-------------------|
| 12 | 12 | 2.1495485475E+00 | 9.2500040532E+01 | -8.1776164306E+02 |
| 12 | 13 | 2.1495485475E+00 | 9.3000040532E+01 | -8.1776163910E+02 |
| 12 | 14 | 2.1495485475E+00 | 9.3500040532E+01 | -8.1776161659E+02 |
| 12 | 15 | 2.1495485475E+00 | 9.4000040532E+01 | -8.1776160828E+02 |
| 12 | 16 | 2.1495485475E+00 | 9.4500040532E+01 | -8.1776158054E+02 |
| 12 | 17 | 2.1495485475E+00 | 9.5000040532E+01 | -8.1776156956E+02 |
| 12 | 18 | 2.1495485475E+00 | 9.5500040532E+01 | -8.1776153687E+02 |
| 12 | 19 | 2.1495485475E+00 | 9.6000040532E+01 | -8.1776152437E+02 |
| 12 | 20 | 2.1495485475E+00 | 9.6500040532E+01 | -8.1776148744E+02 |
| 12 | 21 | 2.1495485475E+00 | 9.7000040532E+01 | -8.1776147336E+02 |
| 12 | 22 | 2.1495485475E+00 | 9.7500040532E+01 | -8.1776143519E+02 |
| 12 | 23 | 2.1495485475E+00 | 9.8000040532E+01 | -8.1776140823E+02 |
| 12 | 24 | 2.1495485475E+00 | 9.8500040532E+01 | -8.1776138182E+02 |
| 12 | 25 | 2.1495485475E+00 | 9.9000040532E+01 | -8.1776135374E+02 |
| 12 | 26 | 2.1495485475E+00 | 9.9500040532E+01 | -8.1776132497E+02 |
| 12 | 27 | 2.1495485475E+00 | 1.0000004053E+02 | -8.1776129573E+02 |
| 12 | 28 | 2.1495485475E+00 | 1.0050004053E+02 | -8.1776126160E+02 |
| 12 | 29 | 2.1495485475E+00 | 1.0100004053E+02 | -8.1776122649E+02 |
| 12 | 30 | 2.1495485475E+00 | 1.0150004053E+02 | -8.1776120104E+02 |
| 12 | 31 | 2.1495485475E+00 | 1.0200004053E+02 | -8.1776115511E+02 |
| 12 | 32 | 2.1495485475E+00 | 1.0250004053E+02 | -8.1776113114E+02 |
| 12 | 33 | 2.1495485475E+00 | 1.0300004053E+02 | -8.1776109547E+02 |
| 12 | 34 | 2.1495485475E+00 | 1.0350004053E+02 | -8.1776105872E+02 |
| 12 | 35 | 2.1495485475E+00 | 1.0400004053E+02 | -8.1776102100E+02 |
| 12 | 36 | 2.1495485475E+00 | 1.0450004053E+02 | -8.1776098239E+02 |
| 12 | 37 | 2.1495485475E+00 | 1.0500004053E+02 | -8.1776092364E+02 |
| 12 | 38 | 2.1495485475E+00 | 1.0550004053E+02 | -8.1776085541E+02 |
| 12 | 39 | 2.1495485475E+00 | 1.0600004053E+02 | -8.1776085280E+02 |
| 12 | 40 | 2.1495485475E+00 | 1.0650004053E+02 | -8.1776078815E+02 |
| 12 | 41 | 2.1495485475E+00 | 1.0700004053E+02 | -8.1776078878E+02 |
| 12 | 42 | 2.1495485475E+00 | 1.0750004053E+02 | -8.1776071919E+02 |
| 12 | 43 | 2.1495485475E+00 | 1.0800004053E+02 | -8.1776072605E+02 |
| 12 | 44 | 2.1495485475E+00 | 1.0850004053E+02 | -8.1776064785E+02 |
| 12 | 45 | 2.1495485475E+00 | 1.0900004053E+02 | -8.1776066061E+02 |
| 12 | 46 | 2.1495485475E+00 | 1.0950004053E+02 | -8.1776057345E+02 |
| 12 | 47 | 2.1495485475E+00 | 1.1000004053E+02 | -8.1776059129E+02 |
| 12 | 48 | 2.1495485475E+00 | 1.1050004053E+02 | -8.1776061787E+02 |
| 12 | 49 | 2.1495485475E+00 | 1.1100004053E+02 | -8.1776058522E+02 |
| 12 | 50 | 2.1495485475E+00 | 1.1150004053E+02 | -8.1776055239E+02 |
| 12 | 51 | 2.1495485475E+00 | 1.1200004053E+02 | -8.1776051991E+02 |
| 12 | 52 | 2.1495485475E+00 | 1.1250004053E+02 | -8.1776048750E+02 |
| 12 | 53 | 2.1495485475E+00 | 1.1300004053E+02 | -8.1776045578E+02 |
| 12 | 54 | 2.1495485475E+00 | 1.1350004053E+02 | -8.1776042924E+02 |
| 12 | 55 | 2.1495485475E+00 | 1.1400004053E+02 | -8.1776038208E+02 |
| 12 | 56 | 2.1495485475E+00 | 1.1450004053E+02 | -8.1776037103E+02 |
| 12 | 57 | 2.1495485475E+00 | 1.1500004053E+02 | -8.1776034164E+02 |
| 12 | 58 | 2.1495485475E+00 | 1.1550004053E+02 | -8.1776031182E+02 |
| 12 | 59 | 2.1495485475E+00 | 1.1600004053E+02 | -8.1776028159E+02 |
| 12 | 60 | 2.1495485475E+00 | 1.1650004053E+02 | -8.1776025088E+02 |
| 12 | 61 | 2.1495485475E+00 | 1.1700004053E+02 | -8.1776021964E+02 |
| 13 | 1  | 2.1595485475E+00 | 8.7000040532E+01 | -8.1776179003E+02 |
| 13 | 2  | 2.1595485475E+00 | 8.7500040532E+01 | -8.1776179916E+02 |

|    |    |                  |                  |                   |
|----|----|------------------|------------------|-------------------|
| 13 | 3  | 2.1595485475E+00 | 8.8000040532E+01 | -8.1776182838E+02 |
| 13 | 4  | 2.1595485475E+00 | 8.8500040532E+01 | -8.1776183365E+02 |
| 13 | 5  | 2.1595485475E+00 | 8.9000040532E+01 | -8.1776184907E+02 |
| 13 | 6  | 2.1595485475E+00 | 8.9500040532E+01 | -8.1776185361E+02 |
| 13 | 7  | 2.1595485475E+00 | 9.0000040532E+01 | -8.1776186415E+02 |
| 13 | 8  | 2.1595485475E+00 | 9.0500040532E+01 | -8.1776185799E+02 |
| 13 | 9  | 2.1595485475E+00 | 9.1000040532E+01 | -8.1776186354E+02 |
| 13 | 10 | 2.1595485475E+00 | 9.1500040532E+01 | -8.1776185471E+02 |
| 13 | 11 | 2.1595485475E+00 | 9.2000040532E+01 | -8.1776184815E+02 |
| 13 | 12 | 2.1595485475E+00 | 9.2500040532E+01 | -8.1776183789E+02 |
| 13 | 13 | 2.1595485475E+00 | 9.3000040532E+01 | -8.1776182925E+02 |
| 13 | 14 | 2.1595485475E+00 | 9.3500040532E+01 | -8.1776180991E+02 |
| 13 | 15 | 2.1595485475E+00 | 9.4000040532E+01 | -8.1776179795E+02 |
| 13 | 16 | 2.1595485475E+00 | 9.4500040532E+01 | -8.1776176005E+02 |
| 13 | 17 | 2.1595485475E+00 | 9.5000040532E+01 | -8.1776175583E+02 |
| 13 | 18 | 2.1595485475E+00 | 9.5500040532E+01 | -8.1776172944E+02 |
| 13 | 19 | 2.1595485475E+00 | 9.6000040532E+01 | -8.1776171335E+02 |
| 13 | 20 | 2.1595485475E+00 | 9.6500040532E+01 | -8.1776167973E+02 |
| 13 | 21 | 2.1595485475E+00 | 9.7000040532E+01 | -8.1776165899E+02 |
| 13 | 22 | 2.1595485475E+00 | 9.7500040532E+01 | -8.1776161319E+02 |
| 13 | 23 | 2.1595485475E+00 | 9.8000040532E+01 | -8.1776160000E+02 |
| 13 | 24 | 2.1595485475E+00 | 9.8500040532E+01 | -8.1776156865E+02 |
| 13 | 25 | 2.1595485475E+00 | 9.9000040532E+01 | -8.1776154463E+02 |
| 13 | 26 | 2.1595485475E+00 | 9.9500040532E+01 | -8.1776151585E+02 |
| 13 | 27 | 2.1595485475E+00 | 1.0000004053E+02 | -8.1776148492E+02 |
| 13 | 28 | 2.1595485475E+00 | 1.0050004053E+02 | -8.1776145439E+02 |
| 13 | 29 | 2.1595485475E+00 | 1.0100004053E+02 | -8.1776141407E+02 |
| 13 | 30 | 2.1595485475E+00 | 1.0150004053E+02 | -8.1776138889E+02 |
| 13 | 31 | 2.1595485475E+00 | 1.0200004053E+02 | -8.1776134208E+02 |
| 13 | 32 | 2.1595485475E+00 | 1.0250004053E+02 | -8.1776131947E+02 |
| 13 | 33 | 2.1595485475E+00 | 1.0300004053E+02 | -8.1776128387E+02 |
| 13 | 34 | 2.1595485475E+00 | 1.0350004053E+02 | -8.1776124671E+02 |
| 13 | 35 | 2.1595485475E+00 | 1.0400004053E+02 | -8.1776120893E+02 |
| 13 | 36 | 2.1595485475E+00 | 1.0450004053E+02 | -8.1776111778E+02 |
| 13 | 37 | 2.1595485475E+00 | 1.0500004053E+02 | -8.1776111000E+02 |
| 13 | 38 | 2.1595485475E+00 | 1.0550004053E+02 | -8.1776105016E+02 |
| 13 | 39 | 2.1595485475E+00 | 1.0600004053E+02 | -8.1776103977E+02 |
| 13 | 40 | 2.1595485475E+00 | 1.0650004053E+02 | -8.1776098088E+02 |
| 13 | 41 | 2.1595485475E+00 | 1.0700004053E+02 | -8.1776097572E+02 |
| 13 | 42 | 2.1595485475E+00 | 1.0750004053E+02 | -8.1776090930E+02 |
| 13 | 43 | 2.1595485475E+00 | 1.0800004053E+02 | -8.1776091304E+02 |
| 13 | 44 | 2.1595485475E+00 | 1.0850004053E+02 | -8.1776083954E+02 |
| 13 | 45 | 2.1595485475E+00 | 1.0900004053E+02 | -8.1776084764E+02 |
| 13 | 46 | 2.1595485475E+00 | 1.0950004053E+02 | -8.1776077074E+02 |
| 13 | 47 | 2.1595485475E+00 | 1.1000004053E+02 | -8.1776077747E+02 |
| 13 | 48 | 2.1595485475E+00 | 1.1050004053E+02 | -8.1776081178E+02 |
| 13 | 49 | 2.1595485475E+00 | 1.1100004053E+02 | -8.1776077875E+02 |
| 13 | 50 | 2.1595485475E+00 | 1.1150004053E+02 | -8.1776074552E+02 |
| 13 | 51 | 2.1595485475E+00 | 1.1200004053E+02 | -8.1776071284E+02 |
| 13 | 52 | 2.1595485475E+00 | 1.1250004053E+02 | -8.1776068290E+02 |
| 13 | 53 | 2.1595485475E+00 | 1.1300004053E+02 | -8.1776064809E+02 |
| 13 | 54 | 2.1595485475E+00 | 1.1350004053E+02 | -8.1776062500E+02 |

|    |    |                  |                  |                   |
|----|----|------------------|------------------|-------------------|
| 13 | 55 | 2.1595485475E+00 | 1.1400004053E+02 | -8.1776057143E+02 |
| 13 | 56 | 2.1595485475E+00 | 1.1450004053E+02 | -8.1776056680E+02 |
| 13 | 57 | 2.1595485475E+00 | 1.1500004053E+02 | -8.1776053726E+02 |
| 13 | 58 | 2.1595485475E+00 | 1.1550004053E+02 | -8.1776050722E+02 |
| 13 | 59 | 2.1595485475E+00 | 1.1600004053E+02 | -8.1776047681E+02 |
| 13 | 60 | 2.1595485475E+00 | 1.1650004053E+02 | -8.1776044589E+02 |
| 13 | 61 | 2.1595485475E+00 | 1.1700004053E+02 | -8.1776041451E+02 |
| 14 | 1  | 2.1695485475E+00 | 8.7000040532E+01 | -8.1776193955E+02 |
| 14 | 2  | 2.1695485475E+00 | 8.7500040532E+01 | -8.1776195835E+02 |
| 14 | 3  | 2.1695485475E+00 | 8.8000040532E+01 | -8.1776198046E+02 |
| 14 | 4  | 2.1695485475E+00 | 8.8500040532E+01 | -8.1776199065E+02 |
| 14 | 5  | 2.1695485475E+00 | 8.9000040532E+01 | -8.1776200386E+02 |
| 14 | 6  | 2.1695485475E+00 | 8.9500040532E+01 | -8.1776200929E+02 |
| 14 | 7  | 2.1695485475E+00 | 9.0000040532E+01 | -8.1776201444E+02 |
| 14 | 8  | 2.1695485475E+00 | 9.0500040532E+01 | -8.1776201493E+02 |
| 14 | 9  | 2.1695485475E+00 | 9.1000040532E+01 | -8.1776201294E+02 |
| 14 | 10 | 2.1695485475E+00 | 9.1500040532E+01 | -8.1776200822E+02 |
| 14 | 11 | 2.1695485475E+00 | 9.2000040532E+01 | -8.1776200023E+02 |
| 14 | 12 | 2.1695485475E+00 | 9.2500040532E+01 | -8.1776199001E+02 |
| 14 | 13 | 2.1695485475E+00 | 9.3000040532E+01 | -8.1776197756E+02 |
| 14 | 14 | 2.1695485475E+00 | 9.3500040532E+01 | -8.1776196131E+02 |
| 14 | 15 | 2.1695485475E+00 | 9.4000040532E+01 | -8.1776194587E+02 |
| 14 | 16 | 2.1695485475E+00 | 9.4500040532E+01 | -8.1776192090E+02 |
| 14 | 17 | 2.1695485475E+00 | 9.5000040532E+01 | -8.1776190631E+02 |
| 14 | 18 | 2.1695485475E+00 | 9.5500040532E+01 | -8.1776188002E+02 |
| 14 | 19 | 2.1695485475E+00 | 9.6000040532E+01 | -8.1776186018E+02 |
| 14 | 20 | 2.1695485475E+00 | 9.6500040532E+01 | -8.1776182989E+02 |
| 14 | 21 | 2.1695485475E+00 | 9.7000040532E+01 | -8.1776180847E+02 |
| 14 | 22 | 2.1695485475E+00 | 9.7500040532E+01 | -8.1776177267E+02 |
| 14 | 23 | 2.1695485475E+00 | 9.8000040532E+01 | -8.1776174855E+02 |
| 14 | 24 | 2.1695485475E+00 | 9.8500040532E+01 | -8.1776172062E+02 |
| 14 | 25 | 2.1695485475E+00 | 9.9000040532E+01 | -8.1776169221E+02 |
| 14 | 26 | 2.1695485475E+00 | 9.9500040532E+01 | -8.1776164924E+02 |
| 14 | 27 | 2.1695485475E+00 | 1.0000004053E+02 | -8.1776163289E+02 |
| 14 | 28 | 2.1695485475E+00 | 1.0050004053E+02 | -8.1776158786E+02 |
| 14 | 29 | 2.1695485475E+00 | 1.0100004053E+02 | -8.1776155901E+02 |
| 14 | 30 | 2.1695485475E+00 | 1.0150004053E+02 | -8.1776153595E+02 |
| 14 | 31 | 2.1695485475E+00 | 1.0200004053E+02 | -8.1776148690E+02 |
| 14 | 32 | 2.1695485475E+00 | 1.0250004053E+02 | -8.1776146596E+02 |
| 14 | 33 | 2.1695485475E+00 | 1.0300004053E+02 | -8.1776142974E+02 |
| 14 | 34 | 2.1695485475E+00 | 1.0350004053E+02 | -8.1776087875E+02 |
| 14 | 35 | 2.1695485475E+00 | 1.0400004053E+02 | -8.1776135498E+02 |
| 14 | 36 | 2.1695485475E+00 | 1.0450004053E+02 | -8.1776126937E+02 |
| 14 | 37 | 2.1695485475E+00 | 1.0500004053E+02 | -8.1776125704E+02 |
| 14 | 38 | 2.1695485475E+00 | 1.0550004053E+02 | -8.1776120451E+02 |
| 14 | 39 | 2.1695485475E+00 | 1.0600004053E+02 | -8.1776118469E+02 |
| 14 | 40 | 2.1695485475E+00 | 1.0650004053E+02 | -8.1776113478E+02 |
| 14 | 41 | 2.1695485475E+00 | 1.0700004053E+02 | -8.1776112095E+02 |
| 14 | 42 | 2.1695485475E+00 | 1.0750004053E+02 | -8.1776106280E+02 |
| 14 | 43 | 2.1695485475E+00 | 1.0800004053E+02 | -8.1776105832E+02 |
| 14 | 44 | 2.1695485475E+00 | 1.0850004053E+02 | -8.1776099140E+02 |
| 14 | 45 | 2.1695485475E+00 | 1.0900004053E+02 | -8.1776099326E+02 |

|    |    |                  |                  |                   |
|----|----|------------------|------------------|-------------------|
| 14 | 46 | 2.1695485475E+00 | 1.0950004053E+02 | -8.1776092039E+02 |
| 14 | 47 | 2.1695485475E+00 | 1.1000004053E+02 | -8.1776092269E+02 |
| 14 | 48 | 2.1695485475E+00 | 1.1050004053E+02 | -8.1776096433E+02 |
| 14 | 49 | 2.1695485475E+00 | 1.1100004053E+02 | -8.1776093114E+02 |
| 14 | 50 | 2.1695485475E+00 | 1.1150004053E+02 | -8.1776089734E+02 |
| 14 | 51 | 2.1695485475E+00 | 1.1200004053E+02 | -8.1776086486E+02 |
| 14 | 52 | 2.1695485475E+00 | 1.1250004053E+02 | -8.1776083789E+02 |
| 14 | 53 | 2.1695485475E+00 | 1.1300004053E+02 | -8.1776079952E+02 |
| 14 | 54 | 2.1695485475E+00 | 1.1350004053E+02 | -8.1776078007E+02 |
| 14 | 55 | 2.1695485475E+00 | 1.1400004053E+02 | -8.1776073530E+02 |
| 14 | 56 | 2.1695485475E+00 | 1.1450004053E+02 | -8.1776072171E+02 |
| 14 | 57 | 2.1695485475E+00 | 1.1500004053E+02 | -8.1776069204E+02 |
| 14 | 58 | 2.1695485475E+00 | 1.1550004053E+02 | -8.1776066187E+02 |
| 14 | 59 | 2.1695485475E+00 | 1.1600004053E+02 | -8.1776063128E+02 |
| 14 | 60 | 2.1695485475E+00 | 1.1650004053E+02 | -8.1776060009E+02 |
| 14 | 61 | 2.1695485475E+00 | 1.1700004053E+02 | -8.1776056848E+02 |
| 15 | 1  | 2.1795485475E+00 | 8.7000040532E+01 | -8.1776205642E+02 |
| 15 | 2  | 2.1795485475E+00 | 8.7500040532E+01 | -8.1776207542E+02 |
| 15 | 3  | 2.1795485475E+00 | 8.8000040532E+01 | -8.1776209241E+02 |
| 15 | 4  | 2.1795485475E+00 | 8.8500040532E+01 | -8.1776210714E+02 |
| 15 | 5  | 2.1795485475E+00 | 8.9000040532E+01 | -8.1776211113E+02 |
| 15 | 6  | 2.1795485475E+00 | 8.9500040532E+01 | -8.1776212466E+02 |
| 15 | 7  | 2.1795485475E+00 | 9.0000040532E+01 | -8.1776212440E+02 |
| 15 | 8  | 2.1795485475E+00 | 9.0500040532E+01 | -8.1776211809E+02 |
| 15 | 9  | 2.1795485475E+00 | 9.1000040532E+01 | -8.1776212205E+02 |
| 15 | 10 | 2.1795485475E+00 | 9.1500040532E+01 | -8.1776212154E+02 |
| 15 | 11 | 2.1795485475E+00 | 9.2000040532E+01 | -8.1776210531E+02 |
| 15 | 12 | 2.1795485475E+00 | 9.2500040532E+01 | -8.1776208972E+02 |
| 15 | 13 | 2.1795485475E+00 | 9.3000040532E+01 | -8.1776208555E+02 |
| 15 | 14 | 2.1795485475E+00 | 9.3500040532E+01 | -8.1776207266E+02 |
| 15 | 15 | 2.1795485475E+00 | 9.4000040532E+01 | -8.1776205345E+02 |
| 15 | 16 | 2.1795485475E+00 | 9.4500040532E+01 | -8.1776203513E+02 |
| 15 | 17 | 2.1795485475E+00 | 9.5000040532E+01 | -8.1776201356E+02 |
| 15 | 18 | 2.1795485475E+00 | 9.5500040532E+01 | -8.1776199063E+02 |
| 15 | 19 | 2.1795485475E+00 | 9.6000040532E+01 | -8.1776196705E+02 |
| 15 | 20 | 2.1795485475E+00 | 9.6500040532E+01 | -8.1776194008E+02 |
| 15 | 21 | 2.1795485475E+00 | 9.7000040532E+01 | -8.1776191503E+02 |
| 15 | 22 | 2.1795485475E+00 | 9.7500040532E+01 | -8.1776188579E+02 |
| 15 | 23 | 2.1795485475E+00 | 9.8000040532E+01 | -8.1776185804E+02 |
| 15 | 24 | 2.1795485475E+00 | 9.8500040532E+01 | -8.1776181562E+02 |
| 15 | 25 | 2.1795485475E+00 | 9.9000040532E+01 | -8.1776180068E+02 |
| 15 | 26 | 2.1795485475E+00 | 9.9500040532E+01 | -8.1776176721E+02 |
| 15 | 27 | 2.1795485475E+00 | 1.0000004053E+02 | -8.1776174055E+02 |
| 15 | 28 | 2.1795485475E+00 | 1.0050004053E+02 | -8.1776170532E+02 |
| 15 | 29 | 2.1795485475E+00 | 1.0100004053E+02 | -8.1776166456E+02 |
| 15 | 30 | 2.1795485475E+00 | 1.0150004053E+02 | -8.1776162976E+02 |
| 15 | 31 | 2.1795485475E+00 | 1.0200004053E+02 | -8.1776159161E+02 |
| 15 | 32 | 2.1795485475E+00 | 1.0250004053E+02 | -8.1776157292E+02 |
| 15 | 33 | 2.1795485475E+00 | 1.0300004053E+02 | -8.1776153597E+02 |
| 15 | 34 | 2.1795485475E+00 | 1.0350004053E+02 | -8.1776144924E+02 |
| 15 | 35 | 2.1795485475E+00 | 1.0400004053E+02 | -8.1776145782E+02 |
| 15 | 36 | 2.1795485475E+00 | 1.0450004053E+02 | -8.1776138446E+02 |



|    |    |                  |                  |                   |
|----|----|------------------|------------------|-------------------|
| 15 | 37 | 2.1795485475E+00 | 1.0500004053E+02 | -8.1776136424E+02 |
| 15 | 38 | 2.1795485475E+00 | 1.0550004053E+02 | -8.1776131847E+02 |
| 15 | 39 | 2.1795485475E+00 | 1.0600004053E+02 | -8.1776128955E+02 |
| 15 | 40 | 2.1795485475E+00 | 1.0650004053E+02 | -8.1776124859E+02 |
| 15 | 41 | 2.1795485475E+00 | 1.0700004053E+02 | -8.1776122635E+02 |
| 15 | 42 | 2.1795485475E+00 | 1.0750004053E+02 | -8.1776117756E+02 |
| 15 | 43 | 2.1795485475E+00 | 1.0800004053E+02 | -8.1776116400E+02 |
| 15 | 44 | 2.1795485475E+00 | 1.0850004053E+02 | -8.1776110490E+02 |
| 15 | 45 | 2.1795485475E+00 | 1.0900004053E+02 | -8.1776109936E+02 |
| 15 | 46 | 2.1795485475E+00 | 1.0950004053E+02 | -8.1776103329E+02 |
| 15 | 47 | 2.1795485475E+00 | 1.1000004053E+02 | -8.1776102840E+02 |
| 15 | 48 | 2.1795485475E+00 | 1.1050004053E+02 | -8.1776107806E+02 |
| 15 | 49 | 2.1795485475E+00 | 1.1100004053E+02 | -8.1776104489E+02 |
| 15 | 50 | 2.1795485475E+00 | 1.1150004053E+02 | -8.1776101275E+02 |
| 15 | 51 | 2.1795485475E+00 | 1.1200004053E+02 | -8.1776098321E+02 |
| 15 | 52 | 2.1795485475E+00 | 1.1250004053E+02 | -8.1776095419E+02 |
| 15 | 53 | 2.1795485475E+00 | 1.1300004053E+02 | -8.1776091830E+02 |
| 15 | 54 | 2.1795485475E+00 | 1.1350004053E+02 | -8.1776089669E+02 |
| 15 | 55 | 2.1795485475E+00 | 1.1400004053E+02 | -8.1776084756E+02 |
| 15 | 56 | 2.1795485475E+00 | 1.1450004053E+02 | -8.1776083823E+02 |
| 15 | 57 | 2.1795485475E+00 | 1.1500004053E+02 | -8.1776080839E+02 |
| 15 | 58 | 2.1795485475E+00 | 1.1550004053E+02 | -8.1776077800E+02 |
| 15 | 59 | 2.1795485475E+00 | 1.1600004053E+02 | -8.1776074719E+02 |
| 15 | 60 | 2.1795485475E+00 | 1.1650004053E+02 | -8.1776071573E+02 |
| 15 | 61 | 2.1795485475E+00 | 1.1700004053E+02 | -8.1776068384E+02 |
| 16 | 1  | 2.1895485475E+00 | 8.7000040532E+01 | -8.1776213104E+02 |
| 16 | 2  | 2.1895485475E+00 | 8.7500040532E+01 | -8.1776215449E+02 |
| 16 | 3  | 2.1895485475E+00 | 8.8000040532E+01 | -8.1776216601E+02 |
| 16 | 4  | 2.1895485475E+00 | 8.8500040532E+01 | -8.1776218544E+02 |
| 16 | 5  | 2.1895485475E+00 | 8.9000040532E+01 | -8.1776218741E+02 |
| 16 | 6  | 2.1895485475E+00 | 8.9500040532E+01 | -8.1776218986E+02 |
| 16 | 7  | 2.1895485475E+00 | 9.0000040532E+01 | -8.1776219614E+02 |
| 16 | 8  | 2.1895485475E+00 | 9.0500040532E+01 | -8.1776220299E+02 |
| 16 | 9  | 2.1895485475E+00 | 9.1000040532E+01 | -8.1776218956E+02 |
| 16 | 10 | 2.1895485475E+00 | 9.1500040532E+01 | -8.1776219665E+02 |
| 16 | 11 | 2.1895485475E+00 | 9.2000040532E+01 | -8.1776217911E+02 |
| 16 | 12 | 2.1895485475E+00 | 9.2500040532E+01 | -8.1776217290E+02 |
| 16 | 13 | 2.1895485475E+00 | 9.3000040532E+01 | -8.1776215211E+02 |
| 16 | 14 | 2.1895485475E+00 | 9.3500040532E+01 | -8.1776213257E+02 |
| 16 | 15 | 2.1895485475E+00 | 9.4000040532E+01 | -8.1776211968E+02 |
| 16 | 16 | 2.1895485475E+00 | 9.4500040532E+01 | -8.1776209460E+02 |
| 16 | 17 | 2.1895485475E+00 | 9.5000040532E+01 | -8.1776207941E+02 |
| 16 | 18 | 2.1895485475E+00 | 9.5500040532E+01 | -8.1776206328E+02 |
| 16 | 19 | 2.1895485475E+00 | 9.6000040532E+01 | -8.1776203583E+02 |
| 16 | 20 | 2.1895485475E+00 | 9.6500040532E+01 | -8.1776199887E+02 |
| 16 | 21 | 2.1895485475E+00 | 9.7000040532E+01 | -8.1776198001E+02 |
| 16 | 22 | 2.1895485475E+00 | 9.7500040532E+01 | -8.1776195750E+02 |
| 16 | 23 | 2.1895485475E+00 | 9.8000040532E+01 | -8.1776192927E+02 |
| 16 | 24 | 2.1895485475E+00 | 9.8500040532E+01 | -8.1776189660E+02 |
| 16 | 25 | 2.1895485475E+00 | 9.9000040532E+01 | -8.1776187123E+02 |
| 16 | 26 | 2.1895485475E+00 | 9.9500040532E+01 | -8.1776184113E+02 |
| 16 | 27 | 2.1895485475E+00 | 1.0000004053E+02 | -8.1776181038E+02 |

|    |    |                  |                  |                   |
|----|----|------------------|------------------|-------------------|
| 16 | 28 | 2.1895485475E+00 | 1.0050004053E+02 | -8.1776177862E+02 |
| 16 | 29 | 2.1895485475E+00 | 1.0100004053E+02 | -8.1776173108E+02 |
| 16 | 30 | 2.1895485475E+00 | 1.0150004053E+02 | -8.1776170878E+02 |
| 16 | 31 | 2.1895485475E+00 | 1.0200004053E+02 | -8.1776165836E+02 |
| 16 | 32 | 2.1895485475E+00 | 1.0250004053E+02 | -8.1776158838E+02 |
| 16 | 33 | 2.1895485475E+00 | 1.0300004053E+02 | -8.1776160512E+02 |
| 16 | 34 | 2.1895485475E+00 | 1.0350004053E+02 | -8.1776152613E+02 |
| 16 | 35 | 2.1895485475E+00 | 1.0400004053E+02 | -8.1776152975E+02 |
| 16 | 36 | 2.1895485475E+00 | 1.0450004053E+02 | -8.1776144504E+02 |
| 16 | 37 | 2.1895485475E+00 | 1.0500004053E+02 | -8.1776143356E+02 |
| 16 | 38 | 2.1895485475E+00 | 1.0550004053E+02 | -8.1776139403E+02 |
| 16 | 39 | 2.1895485475E+00 | 1.0600004053E+02 | -8.1776135378E+02 |
| 16 | 40 | 2.1895485475E+00 | 1.0650004053E+02 | -8.1776132541E+02 |
| 16 | 41 | 2.1895485475E+00 | 1.0700004053E+02 | -8.1776129417E+02 |
| 16 | 42 | 2.1895485475E+00 | 1.0750004053E+02 | -8.1776125504E+02 |
| 16 | 43 | 2.1895485475E+00 | 1.0800004053E+02 | -8.1776123211E+02 |
| 16 | 44 | 2.1895485475E+00 | 1.0850004053E+02 | -8.1776118240E+02 |
| 16 | 45 | 2.1895485475E+00 | 1.0900004053E+02 | -8.1776116777E+02 |
| 16 | 46 | 2.1895485475E+00 | 1.0950004053E+02 | -8.1776110971E+02 |
| 16 | 47 | 2.1895485475E+00 | 1.1000004053E+02 | -8.1776109706E+02 |
| 16 | 48 | 2.1895485475E+00 | 1.1050004053E+02 | -8.1776115508E+02 |
| 16 | 49 | 2.1895485475E+00 | 1.1100004053E+02 | -8.1776112251E+02 |
| 16 | 50 | 2.1895485475E+00 | 1.1150004053E+02 | -8.1776109219E+02 |
| 16 | 51 | 2.1895485475E+00 | 1.1200004053E+02 | -8.1776106322E+02 |
| 16 | 52 | 2.1895485475E+00 | 1.1250004053E+02 | -8.1776103434E+02 |
| 16 | 53 | 2.1895485475E+00 | 1.1300004053E+02 | -8.1776100583E+02 |
| 16 | 54 | 2.1895485475E+00 | 1.1350004053E+02 | -8.1776097697E+02 |
| 16 | 55 | 2.1895485475E+00 | 1.1400004053E+02 | -8.1776094790E+02 |
| 16 | 56 | 2.1895485475E+00 | 1.1450004053E+02 | -8.1776091829E+02 |
| 16 | 57 | 2.1895485475E+00 | 1.1500004053E+02 | -8.1776088844E+02 |
| 16 | 58 | 2.1895485475E+00 | 1.1550004053E+02 | -8.1776085782E+02 |
| 16 | 59 | 2.1895485475E+00 | 1.1600004053E+02 | -8.1776082679E+02 |
| 16 | 60 | 2.1895485475E+00 | 1.1650004053E+02 | -8.1776079507E+02 |
| 16 | 61 | 2.1895485475E+00 | 1.1700004053E+02 | -8.1776076288E+02 |
| 17 | 1  | 2.1995485475E+00 | 8.7000040532E+01 | -8.1776216907E+02 |
| 17 | 2  | 2.1995485475E+00 | 8.7500040532E+01 | -8.1776219698E+02 |
| 17 | 3  | 2.1995485475E+00 | 8.8000040532E+01 | -8.1776220303E+02 |
| 17 | 4  | 2.1995485475E+00 | 8.8500040532E+01 | -8.1776222740E+02 |
| 17 | 5  | 2.1995485475E+00 | 8.9000040532E+01 | -8.1776222365E+02 |
| 17 | 6  | 2.1995485475E+00 | 8.9500040532E+01 | -8.1776224069E+02 |
| 17 | 7  | 2.1995485475E+00 | 9.0000040532E+01 | -8.1776223146E+02 |
| 17 | 8  | 2.1995485475E+00 | 9.0500040532E+01 | -8.1776224586E+02 |
| 17 | 9  | 2.1995485475E+00 | 9.1000040532E+01 | -8.1776222774E+02 |
| 17 | 10 | 2.1995485475E+00 | 9.1500040532E+01 | -8.1776223558E+02 |
| 17 | 11 | 2.1995485475E+00 | 9.2000040532E+01 | -8.1776220986E+02 |
| 17 | 12 | 2.1995485475E+00 | 9.2500040532E+01 | -8.1776221412E+02 |
| 17 | 13 | 2.1995485475E+00 | 9.3000040532E+01 | -8.1776218912E+02 |
| 17 | 14 | 2.1995485475E+00 | 9.3500040532E+01 | -8.1776217997E+02 |
| 17 | 15 | 2.1995485475E+00 | 9.4000040532E+01 | -8.1776215635E+02 |
| 17 | 16 | 2.1995485475E+00 | 9.4500040532E+01 | -8.1776214157E+02 |
| 17 | 17 | 2.1995485475E+00 | 9.5000040532E+01 | -8.1776211580E+02 |
| 17 | 18 | 2.1995485475E+00 | 9.5500040532E+01 | -8.1776209995E+02 |

|    |    |                  |                  |                   |
|----|----|------------------|------------------|-------------------|
| 17 | 19 | 2.1995485475E+00 | 9.6000040532E+01 | -8.1776206520E+02 |
| 17 | 20 | 2.1995485475E+00 | 9.6500040532E+01 | -8.1776204522E+02 |
| 17 | 21 | 2.1995485475E+00 | 9.7000040532E+01 | -8.1776201555E+02 |
| 17 | 22 | 2.1995485475E+00 | 9.7500040532E+01 | -8.1776199324E+02 |
| 17 | 23 | 2.1995485475E+00 | 9.8000040532E+01 | -8.1776196466E+02 |
| 17 | 24 | 2.1995485475E+00 | 9.8500040532E+01 | -8.1776193549E+02 |
| 17 | 25 | 2.1995485475E+00 | 9.9000040532E+01 | -8.1776190548E+02 |
| 17 | 26 | 2.1995485475E+00 | 9.9500040532E+01 | -8.1776186108E+02 |
| 17 | 27 | 2.1995485475E+00 | 1.0000004053E+02 | -8.1776184175E+02 |
| 17 | 28 | 2.1995485475E+00 | 1.0050004053E+02 | -8.1776140170E+02 |
| 17 | 29 | 2.1995485475E+00 | 1.0100004053E+02 | -8.1776176237E+02 |
| 17 | 30 | 2.1995485475E+00 | 1.0150004053E+02 | -8.1776174535E+02 |
| 17 | 31 | 2.1995485475E+00 | 1.0200004053E+02 | -8.1776168924E+02 |
| 17 | 32 | 2.1995485475E+00 | 1.0250004053E+02 | -8.1776161508E+02 |
| 17 | 33 | 2.1995485475E+00 | 1.0300004053E+02 | -8.1776163503E+02 |
| 17 | 34 | 2.1995485475E+00 | 1.0350004053E+02 | -8.1776155112E+02 |
| 17 | 35 | 2.1995485475E+00 | 1.0400004053E+02 | -8.1776156295E+02 |
| 17 | 36 | 2.1995485475E+00 | 1.0450004053E+02 | -8.1776149752E+02 |
| 17 | 37 | 2.1995485475E+00 | 1.0500004053E+02 | -8.1776146797E+02 |
| 17 | 38 | 2.1995485475E+00 | 1.0550004053E+02 | -8.1776143414E+02 |
| 17 | 39 | 2.1995485475E+00 | 1.0600004053E+02 | -8.1776137595E+02 |
| 17 | 40 | 2.1995485475E+00 | 1.0650004053E+02 | -8.1776136638E+02 |
| 17 | 41 | 2.1995485475E+00 | 1.0700004053E+02 | -8.1776132641E+02 |
| 17 | 42 | 2.1995485475E+00 | 1.0750004053E+02 | -8.1776129674E+02 |
| 17 | 43 | 2.1995485475E+00 | 1.0800004053E+02 | -8.1776126450E+02 |
| 17 | 44 | 2.1995485475E+00 | 1.0850004053E+02 | -8.1776122441E+02 |
| 17 | 45 | 2.1995485475E+00 | 1.0900004053E+02 | -8.1776120074E+02 |
| 17 | 46 | 2.1995485475E+00 | 1.0950004053E+02 | -8.1776114765E+02 |
| 17 | 47 | 2.1995485475E+00 | 1.1000004053E+02 | -8.1776113072E+02 |
| 17 | 48 | 2.1995485475E+00 | 1.1050004053E+02 | -8.1776119767E+02 |
| 17 | 49 | 2.1995485475E+00 | 1.1100004053E+02 | -8.1776116723E+02 |
| 17 | 50 | 2.1995485475E+00 | 1.1150004053E+02 | -8.1776113781E+02 |
| 17 | 51 | 2.1995485475E+00 | 1.1200004053E+02 | -8.1776110922E+02 |
| 17 | 52 | 2.1995485475E+00 | 1.1250004053E+02 | -8.1776108061E+02 |
| 17 | 53 | 2.1995485475E+00 | 1.1300004053E+02 | -8.1776105205E+02 |
| 17 | 54 | 2.1995485475E+00 | 1.1350004053E+02 | -8.1776102329E+02 |
| 17 | 55 | 2.1995485475E+00 | 1.1400004053E+02 | -8.1776099413E+02 |
| 17 | 56 | 2.1995485475E+00 | 1.1450004053E+02 | -8.1776096447E+02 |
| 17 | 57 | 2.1995485475E+00 | 1.1500004053E+02 | -8.1776093433E+02 |
| 17 | 58 | 2.1995485475E+00 | 1.1550004053E+02 | -8.1776090355E+02 |
| 17 | 59 | 2.1995485475E+00 | 1.1600004053E+02 | -8.1776087225E+02 |
| 17 | 60 | 2.1995485475E+00 | 1.1650004053E+02 | -8.1776084022E+02 |
| 17 | 61 | 2.1995485475E+00 | 1.1700004053E+02 | -8.1776080780E+02 |
| 18 | 1  | 2.2095485475E+00 | 8.7000040532E+01 | -8.1776217256E+02 |
| 18 | 2  | 2.2095485475E+00 | 8.7500040532E+01 | -8.1776220524E+02 |
| 18 | 3  | 2.2095485475E+00 | 8.8000040532E+01 | -8.1776220557E+02 |
| 18 | 4  | 2.2095485475E+00 | 8.8500040532E+01 | -8.1776223490E+02 |
| 18 | 5  | 2.2095485475E+00 | 8.9000040532E+01 | -8.1776222540E+02 |
| 18 | 6  | 2.2095485475E+00 | 8.9500040532E+01 | -8.1776225000E+02 |
| 18 | 7  | 2.2095485475E+00 | 9.0000040532E+01 | -8.1776223240E+02 |
| 18 | 8  | 2.2095485475E+00 | 9.0500040532E+01 | -8.1776223854E+02 |
| 18 | 9  | 2.2095485475E+00 | 9.1000040532E+01 | -8.1776222453E+02 |



|       |                  |                  |                   |
|-------|------------------|------------------|-------------------|
| 18 10 | 2.2095485475E+00 | 9.1500040532E+01 | -8.1776224014E+02 |
| 18 11 | 2.2095485475E+00 | 9.2000040532E+01 | -8.1776221303E+02 |
| 18 12 | 2.2095485475E+00 | 9.2500040532E+01 | -8.1776220433E+02 |
| 18 13 | 2.2095485475E+00 | 9.3000040532E+01 | -8.1776218851E+02 |
| 18 14 | 2.2095485475E+00 | 9.3500040532E+01 | -8.1776218645E+02 |
| 18 15 | 2.2095485475E+00 | 9.4000040532E+01 | -8.1776215539E+02 |
| 18 16 | 2.2095485475E+00 | 9.4500040532E+01 | -8.1776214781E+02 |
| 18 17 | 2.2095485475E+00 | 9.5000040532E+01 | -8.1776211454E+02 |
| 18 18 | 2.2095485475E+00 | 9.5500040532E+01 | -8.1776208870E+02 |
| 18 19 | 2.2095485475E+00 | 9.6000040532E+01 | -8.1776206708E+02 |
| 18 20 | 2.2095485475E+00 | 9.6500040532E+01 | -8.1776205095E+02 |
| 18 21 | 2.2095485475E+00 | 9.7000040532E+01 | -8.1776201043E+02 |
| 18 22 | 2.2095485475E+00 | 9.7500040532E+01 | -8.1776199483E+02 |
| 18 23 | 2.2095485475E+00 | 9.8000040532E+01 | -8.1776196595E+02 |
| 18 24 | 2.2095485475E+00 | 9.8500040532E+01 | -8.1776192188E+02 |
| 18 25 | 2.2095485475E+00 | 9.9000040532E+01 | -8.1776190619E+02 |
| 18 26 | 2.2095485475E+00 | 9.9500040532E+01 | -8.1776187164E+02 |
| 18 27 | 2.2095485475E+00 | 1.0000004053E+02 | -8.1776183253E+02 |
| 18 28 | 2.2095485475E+00 | 1.0050004053E+02 | -8.1776172171E+02 |
| 18 29 | 2.2095485475E+00 | 1.0100004053E+02 | -8.1776175971E+02 |
| 18 30 | 2.2095485475E+00 | 1.0150004053E+02 | -8.1776169827E+02 |
| 18 31 | 2.2095485475E+00 | 1.0200004053E+02 | -8.1776168621E+02 |
| 18 32 | 2.2095485475E+00 | 1.0250004053E+02 | -8.1776163401E+02 |
| 18 33 | 2.2095485475E+00 | 1.0300004053E+02 | -8.1776163796E+02 |
| 18 34 | 2.2095485475E+00 | 1.0350004053E+02 | -8.1776157093E+02 |
| 18 35 | 2.2095485475E+00 | 1.0400004053E+02 | -8.1776156268E+02 |
| 18 36 | 2.2095485475E+00 | 1.0450004053E+02 | -8.1776150995E+02 |
| 18 37 | 2.2095485475E+00 | 1.0500004053E+02 | -8.1776146260E+02 |
| 18 38 | 2.2095485475E+00 | 1.0550004053E+02 | -8.1776144226E+02 |
| 18 39 | 2.2095485475E+00 | 1.0600004053E+02 | -8.1776139427E+02 |
| 18 40 | 2.2095485475E+00 | 1.0650004053E+02 | -8.1776137273E+02 |
| 18 41 | 2.2095485475E+00 | 1.0700004053E+02 | -8.1776132414E+02 |
| 18 42 | 2.2095485475E+00 | 1.0750004053E+02 | -8.1776129872E+02 |
| 18 43 | 2.2095485475E+00 | 1.0800004053E+02 | -8.1776126315E+02 |
| 18 44 | 2.2095485475E+00 | 1.0850004053E+02 | -8.1776123383E+02 |
| 18 45 | 2.2095485475E+00 | 1.0900004053E+02 | -8.1776119969E+02 |
| 18 46 | 2.2095485475E+00 | 1.0950004053E+02 | -8.1776116055E+02 |
| 18 47 | 2.2095485475E+00 | 1.1000004053E+02 | -8.1776113166E+02 |
| 18 48 | 2.2095485475E+00 | 1.1050004053E+02 | -8.1776120986E+02 |
| 18 49 | 2.2095485475E+00 | 1.1100004053E+02 | -8.1776118044E+02 |
| 18 50 | 2.2095485475E+00 | 1.1150004053E+02 | -8.1776115173E+02 |
| 18 51 | 2.2095485475E+00 | 1.1200004053E+02 | -8.1776112348E+02 |
| 18 52 | 2.2095485475E+00 | 1.1250004053E+02 | -8.1776109504E+02 |
| 18 53 | 2.2095485475E+00 | 1.1300004053E+02 | -8.1776106656E+02 |
| 18 54 | 2.2095485475E+00 | 1.1350004053E+02 | -8.1776103768E+02 |
| 18 55 | 2.2095485475E+00 | 1.1400004053E+02 | -8.1776100846E+02 |
| 18 56 | 2.2095485475E+00 | 1.1450004053E+02 | -8.1776097866E+02 |
| 18 57 | 2.2095485475E+00 | 1.1500004053E+02 | -8.1776094831E+02 |
| 18 58 | 2.2095485475E+00 | 1.1550004053E+02 | -8.1776091730E+02 |
| 18 59 | 2.2095485475E+00 | 1.1600004053E+02 | -8.1776088581E+02 |
| 18 60 | 2.2095485475E+00 | 1.1650004053E+02 | -8.1776085348E+02 |
| 18 61 | 2.2095485475E+00 | 1.1700004053E+02 | -8.1776082074E+02 |

|    |    |                  |                  |                   |
|----|----|------------------|------------------|-------------------|
| 19 | 1  | 2.2195485475E+00 | 8.7000040532E+01 | -8.1776214319E+02 |
| 19 | 2  | 2.2195485475E+00 | 8.7500040532E+01 | -8.1776216817E+02 |
| 19 | 3  | 2.2195485475E+00 | 8.8000040532E+01 | -8.1776217542E+02 |
| 19 | 4  | 2.2195485475E+00 | 8.8500040532E+01 | -8.1776220963E+02 |
| 19 | 5  | 2.2195485475E+00 | 8.9000040532E+01 | -8.1776219431E+02 |
| 19 | 6  | 2.2195485475E+00 | 8.9500040532E+01 | -8.1776221214E+02 |
| 19 | 7  | 2.2195485475E+00 | 9.0000040532E+01 | -8.1776220061E+02 |
| 19 | 8  | 2.2195485475E+00 | 9.0500040532E+01 | -8.1776222140E+02 |
| 19 | 9  | 2.2195485475E+00 | 9.1000040532E+01 | -8.1776219550E+02 |
| 19 | 10 | 2.2195485475E+00 | 9.1500040532E+01 | -8.1776221224E+02 |
| 19 | 11 | 2.2195485475E+00 | 9.2000040532E+01 | -8.1776218016E+02 |
| 19 | 12 | 2.2195485475E+00 | 9.2500040532E+01 | -8.1776218571E+02 |
| 19 | 13 | 2.2195485475E+00 | 9.3000040532E+01 | -8.1776215530E+02 |
| 19 | 14 | 2.2195485475E+00 | 9.3500040532E+01 | -8.1776214356E+02 |
| 19 | 15 | 2.2195485475E+00 | 9.4000040532E+01 | -8.1776212189E+02 |
| 19 | 16 | 2.2195485475E+00 | 9.4500040532E+01 | -8.1776211456E+02 |
| 19 | 17 | 2.2195485475E+00 | 9.5000040532E+01 | -8.1776208081E+02 |
| 19 | 18 | 2.2195485475E+00 | 9.5500040532E+01 | -8.1776206885E+02 |
| 19 | 19 | 2.2195485475E+00 | 9.6000040532E+01 | -8.1776203302E+02 |
| 19 | 20 | 2.2195485475E+00 | 9.6500040532E+01 | -8.1776201704E+02 |
| 19 | 21 | 2.2195485475E+00 | 9.7000040532E+01 | -8.1776197947E+02 |
| 19 | 22 | 2.2195485475E+00 | 9.7500040532E+01 | -8.1776196413E+02 |
| 19 | 23 | 2.2195485475E+00 | 9.8000040532E+01 | -8.1776193510E+02 |
| 19 | 24 | 2.2195485475E+00 | 9.8500040532E+01 | -8.1776190107E+02 |
| 19 | 25 | 2.2195485475E+00 | 9.9000040532E+01 | -8.1776187490E+02 |
| 19 | 26 | 2.2195485475E+00 | 9.9500040532E+01 | -8.1776184376E+02 |
| 19 | 27 | 2.2195485475E+00 | 1.0000004053E+02 | -8.1776181255E+02 |
| 19 | 28 | 2.2195485475E+00 | 1.0050004053E+02 | -8.1776173252E+02 |
| 19 | 29 | 2.2195485475E+00 | 1.0100004053E+02 | -8.1776172476E+02 |
| 19 | 30 | 2.2195485475E+00 | 1.0150004053E+02 | -8.1776165914E+02 |
| 19 | 31 | 2.2195485475E+00 | 1.0200004053E+02 | -8.1776164745E+02 |
| 19 | 32 | 2.2195485475E+00 | 1.0250004053E+02 | -8.1776161458E+02 |
| 19 | 33 | 2.2195485475E+00 | 1.0300004053E+02 | -8.1776160637E+02 |
| 19 | 34 | 2.2195485475E+00 | 1.0350004053E+02 | -8.1776155153E+02 |
| 19 | 35 | 2.2195485475E+00 | 1.0400004053E+02 | -8.1776153080E+02 |
| 19 | 36 | 2.2195485475E+00 | 1.0450004053E+02 | -8.1776146871E+02 |
| 19 | 37 | 2.2195485475E+00 | 1.0500004053E+02 | -8.1776143703E+02 |
| 19 | 38 | 2.2195485475E+00 | 1.0550004053E+02 | -8.1776141364E+02 |
| 19 | 39 | 2.2195485475E+00 | 1.0600004053E+02 | -8.1776135745E+02 |
| 19 | 40 | 2.2195485475E+00 | 1.0650004053E+02 | -8.1776134888E+02 |
| 19 | 41 | 2.2195485475E+00 | 1.0700004053E+02 | -8.1776129166E+02 |
| 19 | 42 | 2.2195485475E+00 | 1.0750004053E+02 | -8.1776128020E+02 |
| 19 | 43 | 2.2195485475E+00 | 1.0800004053E+02 | -8.1776122680E+02 |
| 19 | 44 | 2.2195485475E+00 | 1.0850004053E+02 | -8.1776121145E+02 |
| 19 | 45 | 2.2195485475E+00 | 1.0900004053E+02 | -8.1776116708E+02 |
| 19 | 46 | 2.2195485475E+00 | 1.0950004053E+02 | -8.1776113545E+02 |
| 19 | 47 | 2.2195485475E+00 | 1.1000004053E+02 | -8.1776110039E+02 |
| 19 | 48 | 2.2195485475E+00 | 1.1050004053E+02 | -8.1776119309E+02 |
| 19 | 49 | 2.2195485475E+00 | 1.1100004053E+02 | -8.1776116434E+02 |
| 19 | 50 | 2.2195485475E+00 | 1.1150004053E+02 | -8.1776113624E+02 |
| 19 | 51 | 2.2195485475E+00 | 1.1200004053E+02 | -8.1776110806E+02 |
| 19 | 52 | 2.2195485475E+00 | 1.1250004053E+02 | -8.1776107992E+02 |

|    |    |                  |                  |                   |
|----|----|------------------|------------------|-------------------|
| 19 | 53 | 2.2195485475E+00 | 1.1300004053E+02 | -8.1776105138E+02 |
| 19 | 54 | 2.2195485475E+00 | 1.1350004053E+02 | -8.1776102233E+02 |
| 19 | 55 | 2.2195485475E+00 | 1.1400004053E+02 | -8.1776099303E+02 |
| 19 | 56 | 2.2195485475E+00 | 1.1450004053E+02 | -8.1776096308E+02 |
| 19 | 57 | 2.2195485475E+00 | 1.1500004053E+02 | -8.1776093258E+02 |
| 19 | 58 | 2.2195485475E+00 | 1.1550004053E+02 | -8.1776090134E+02 |
| 19 | 59 | 2.2195485475E+00 | 1.1600004053E+02 | -8.1776086959E+02 |
| 19 | 60 | 2.2195485475E+00 | 1.1650004053E+02 | -8.1776083703E+02 |
| 19 | 61 | 2.2195485475E+00 | 1.1700004053E+02 | -8.1776080397E+02 |
| 20 | 1  | 2.2295485475E+00 | 8.7000040532E+01 | -8.1776208170E+02 |
| 20 | 2  | 2.2295485475E+00 | 8.7500040532E+01 | -8.1776212231E+02 |
| 20 | 3  | 2.2295485475E+00 | 8.8000040532E+01 | -8.1776211397E+02 |
| 20 | 4  | 2.2295485475E+00 | 8.8500040532E+01 | -8.1776215359E+02 |
| 20 | 5  | 2.2295485475E+00 | 8.9000040532E+01 | -8.1776213211E+02 |
| 20 | 6  | 2.2295485475E+00 | 8.9500040532E+01 | -8.1776216418E+02 |
| 20 | 7  | 2.2295485475E+00 | 9.0000040532E+01 | -8.1776213781E+02 |
| 20 | 8  | 2.2295485475E+00 | 9.0500040532E+01 | -8.1776216655E+02 |
| 20 | 9  | 2.2295485475E+00 | 9.1000040532E+01 | -8.1776212894E+02 |
| 20 | 10 | 2.2295485475E+00 | 9.1500040532E+01 | -8.1776215346E+02 |
| 20 | 11 | 2.2295485475E+00 | 9.2000040532E+01 | -8.1776211646E+02 |
| 20 | 12 | 2.2295485475E+00 | 9.2500040532E+01 | -8.1776212973E+02 |
| 20 | 13 | 2.2295485475E+00 | 9.3000040532E+01 | -8.1776209137E+02 |
| 20 | 14 | 2.2295485475E+00 | 9.3500040532E+01 | -8.1776209393E+02 |
| 20 | 15 | 2.2295485475E+00 | 9.4000040532E+01 | -8.1776205773E+02 |
| 20 | 16 | 2.2295485475E+00 | 9.4500040532E+01 | -8.1776205785E+02 |
| 20 | 17 | 2.2295485475E+00 | 9.5000040532E+01 | -8.1776201648E+02 |
| 20 | 18 | 2.2295485475E+00 | 9.5500040532E+01 | -8.1776201193E+02 |
| 20 | 19 | 2.2295485475E+00 | 9.6000040532E+01 | -8.1776196849E+02 |
| 20 | 20 | 2.2295485475E+00 | 9.6500040532E+01 | -8.1776196004E+02 |
| 20 | 21 | 2.2295485475E+00 | 9.7000040532E+01 | -8.1776191129E+02 |
| 20 | 22 | 2.2295485475E+00 | 9.7500040532E+01 | -8.1776190310E+02 |
| 20 | 23 | 2.2295485475E+00 | 9.8000040532E+01 | -8.1776187375E+02 |
| 20 | 24 | 2.2295485475E+00 | 9.8500040532E+01 | -8.1776184348E+02 |
| 20 | 25 | 2.2295485475E+00 | 9.9000040532E+01 | -8.1776181299E+02 |
| 20 | 26 | 2.2295485475E+00 | 9.9500040532E+01 | -8.1776173741E+02 |
| 20 | 27 | 2.2295485475E+00 | 1.0000004053E+02 | -8.1776174761E+02 |
| 20 | 28 | 2.2295485475E+00 | 1.0050004053E+02 | -8.1776166450E+02 |
| 20 | 29 | 2.2295485475E+00 | 1.0100004053E+02 | -8.1776165942E+02 |
| 20 | 30 | 2.2295485475E+00 | 1.0150004053E+02 | -8.1776161772E+02 |
| 20 | 31 | 2.2295485475E+00 | 1.0200004053E+02 | -8.1776157242E+02 |
| 20 | 32 | 2.2295485475E+00 | 1.0250004053E+02 | -8.1776154513E+02 |
| 20 | 33 | 2.2295485475E+00 | 1.0300004053E+02 | -8.1776154485E+02 |
| 20 | 34 | 2.2295485475E+00 | 1.0350004053E+02 | -8.1776148243E+02 |
| 20 | 35 | 2.2295485475E+00 | 1.0400004053E+02 | -8.1776146938E+02 |
| 20 | 36 | 2.2295485475E+00 | 1.0450004053E+02 | -8.1776143013E+02 |
| 20 | 37 | 2.2295485475E+00 | 1.0500004053E+02 | -8.1776136681E+02 |
| 20 | 38 | 2.2295485475E+00 | 1.0550004053E+02 | -8.1776136661E+02 |
| 20 | 39 | 2.2295485475E+00 | 1.0600004053E+02 | -8.1776130175E+02 |
| 20 | 40 | 2.2295485475E+00 | 1.0650004053E+02 | -8.1776129598E+02 |
| 20 | 41 | 2.2295485475E+00 | 1.0700004053E+02 | -8.1776122972E+02 |
| 20 | 42 | 2.2295485475E+00 | 1.0750004053E+02 | -8.1776122120E+02 |
| 20 | 43 | 2.2295485475E+00 | 1.0800004053E+02 | -8.1776115470E+02 |

|    |    |                  |                  |                   |
|----|----|------------------|------------------|-------------------|
| 20 | 44 | 2.2295485475E+00 | 1.0850004053E+02 | -8.1776115371E+02 |
| 20 | 45 | 2.2295485475E+00 | 1.0900004053E+02 | -8.1776110136E+02 |
| 20 | 46 | 2.2295485475E+00 | 1.0950004053E+02 | -8.1776108991E+02 |
| 20 | 47 | 2.2295485475E+00 | 1.1000004053E+02 | -8.1776103870E+02 |
| 20 | 48 | 2.2295485475E+00 | 1.1050004053E+02 | -8.1776114896E+02 |
| 20 | 49 | 2.2295485475E+00 | 1.1100004053E+02 | -8.1776112095E+02 |
| 20 | 50 | 2.2295485475E+00 | 1.1150004053E+02 | -8.1776109316E+02 |
| 20 | 51 | 2.2295485475E+00 | 1.1200004053E+02 | -8.1776106537E+02 |
| 20 | 52 | 2.2295485475E+00 | 1.1250004053E+02 | -8.1776103705E+02 |
| 20 | 53 | 2.2295485475E+00 | 1.1300004053E+02 | -8.1776100859E+02 |
| 20 | 54 | 2.2295485475E+00 | 1.1350004053E+02 | -8.1776097950E+02 |
| 20 | 55 | 2.2295485475E+00 | 1.1400004053E+02 | -8.1776095014E+02 |
| 20 | 56 | 2.2295485475E+00 | 1.1450004053E+02 | -8.1776091996E+02 |
| 20 | 57 | 2.2295485475E+00 | 1.1500004053E+02 | -8.1776088935E+02 |
| 20 | 58 | 2.2295485475E+00 | 1.1550004053E+02 | -8.1776085788E+02 |
| 20 | 59 | 2.2295485475E+00 | 1.1600004053E+02 | -8.1776082589E+02 |
| 20 | 60 | 2.2295485475E+00 | 1.1650004053E+02 | -8.1776079305E+02 |
| 20 | 61 | 2.2295485475E+00 | 1.1700004053E+02 | -8.1776075980E+02 |
| 21 | 1  | 2.2395485475E+00 | 8.7000040532E+01 | -8.1776199212E+02 |
| 21 | 2  | 2.2395485475E+00 | 8.7500040532E+01 | -8.1776204003E+02 |
| 21 | 3  | 2.2395485475E+00 | 8.8000040532E+01 | -8.1776202361E+02 |
| 21 | 4  | 2.2395485475E+00 | 8.8500040532E+01 | -8.1776206812E+02 |
| 21 | 5  | 2.2395485475E+00 | 8.9000040532E+01 | -8.1776204016E+02 |
| 21 | 6  | 2.2395485475E+00 | 8.9500040532E+01 | -8.1776208094E+02 |
| 21 | 7  | 2.2395485475E+00 | 9.0000040532E+01 | -8.1776204568E+02 |
| 21 | 8  | 2.2395485475E+00 | 9.0500040532E+01 | -8.1776206705E+02 |
| 21 | 9  | 2.2395485475E+00 | 9.1000040532E+01 | -8.1776203963E+02 |
| 21 | 10 | 2.2395485475E+00 | 9.1500040532E+01 | -8.1776206581E+02 |
| 21 | 11 | 2.2395485475E+00 | 9.2000040532E+01 | -8.1776202360E+02 |
| 21 | 12 | 2.2395485475E+00 | 9.2500040532E+01 | -8.1776204146E+02 |
| 21 | 13 | 2.2395485475E+00 | 9.3000040532E+01 | -8.1776199825E+02 |
| 21 | 14 | 2.2395485475E+00 | 9.3500040532E+01 | -8.1776200849E+02 |
| 21 | 15 | 2.2395485475E+00 | 9.4000040532E+01 | -8.1776196449E+02 |
| 21 | 16 | 2.2395485475E+00 | 9.4500040532E+01 | -8.1776196887E+02 |
| 21 | 17 | 2.2395485475E+00 | 9.5000040532E+01 | -8.1776192312E+02 |
| 21 | 18 | 2.2395485475E+00 | 9.5500040532E+01 | -8.1776192258E+02 |
| 21 | 19 | 2.2395485475E+00 | 9.6000040532E+01 | -8.1776187498E+02 |
| 21 | 20 | 2.2395485475E+00 | 9.6500040532E+01 | -8.1776187054E+02 |
| 21 | 21 | 2.2395485475E+00 | 9.7000040532E+01 | -8.1776182093E+02 |
| 21 | 22 | 2.2395485475E+00 | 9.7500040532E+01 | -8.1776181336E+02 |
| 21 | 23 | 2.2395485475E+00 | 9.8000040532E+01 | -8.1776178385E+02 |
| 21 | 24 | 2.2395485475E+00 | 9.8500040532E+01 | -8.1776175353E+02 |
| 21 | 25 | 2.2395485475E+00 | 9.9000040532E+01 | -8.1776172271E+02 |
| 21 | 26 | 2.2395485475E+00 | 9.9500040532E+01 | -8.1776163982E+02 |
| 21 | 27 | 2.2395485475E+00 | 1.0000004053E+02 | -8.1776166000E+02 |
| 21 | 28 | 2.2395485475E+00 | 1.0050004053E+02 | -8.1776159448E+02 |
| 21 | 29 | 2.2395485475E+00 | 1.0100004053E+02 | -8.1776156208E+02 |
| 21 | 30 | 2.2395485475E+00 | 1.0150004053E+02 | -8.1776154128E+02 |
| 21 | 31 | 2.2395485475E+00 | 1.0200004053E+02 | -8.1776149138E+02 |
| 21 | 32 | 2.2395485475E+00 | 1.0250004053E+02 | -8.1776147864E+02 |
| 21 | 33 | 2.2395485475E+00 | 1.0300004053E+02 | -8.1776145564E+02 |
| 21 | 34 | 2.2395485475E+00 | 1.0350004053E+02 | -8.1776141677E+02 |



|    |    |                  |                  |                   |
|----|----|------------------|------------------|-------------------|
| 21 | 35 | 2.2395485475E+00 | 1.0400004053E+02 | -8.1776137688E+02 |
| 21 | 36 | 2.2395485475E+00 | 1.0450004053E+02 | -8.1776135634E+02 |
| 21 | 37 | 2.2395485475E+00 | 1.0500004053E+02 | -8.1776127093E+02 |
| 21 | 38 | 2.2395485475E+00 | 1.0550004053E+02 | -8.1776128313E+02 |
| 21 | 39 | 2.2395485475E+00 | 1.0600004053E+02 | -8.1776120943E+02 |
| 21 | 40 | 2.2395485475E+00 | 1.0650004053E+02 | -8.1776121798E+02 |
| 21 | 41 | 2.2395485475E+00 | 1.0700004053E+02 | -8.1776113508E+02 |
| 21 | 42 | 2.2395485475E+00 | 1.0750004053E+02 | -8.1776114771E+02 |
| 21 | 43 | 2.2395485475E+00 | 1.0800004053E+02 | -8.1776107539E+02 |
| 21 | 44 | 2.2395485475E+00 | 1.0850004053E+02 | -8.1776108068E+02 |
| 21 | 45 | 2.2395485475E+00 | 1.0900004053E+02 | -8.1776100147E+02 |
| 21 | 46 | 2.2395485475E+00 | 1.0950004053E+02 | -8.1776100874E+02 |
| 21 | 47 | 2.2395485475E+00 | 1.1000004053E+02 | -8.1776094929E+02 |
| 21 | 48 | 2.2395485475E+00 | 1.1050004053E+02 | -8.1776107980E+02 |
| 21 | 49 | 2.2395485475E+00 | 1.1100004053E+02 | -8.1776105257E+02 |
| 21 | 50 | 2.2395485475E+00 | 1.1150004053E+02 | -8.1776102480E+02 |
| 21 | 51 | 2.2395485475E+00 | 1.1200004053E+02 | -8.1776099722E+02 |
| 21 | 52 | 2.2395485475E+00 | 1.1250004053E+02 | -8.1776096906E+02 |
| 21 | 53 | 2.2395485475E+00 | 1.1300004053E+02 | -8.1776094054E+02 |
| 21 | 54 | 2.2395485475E+00 | 1.1350004053E+02 | -8.1776091146E+02 |
| 21 | 55 | 2.2395485475E+00 | 1.1400004053E+02 | -8.1776088200E+02 |
| 21 | 56 | 2.2395485475E+00 | 1.1450004053E+02 | -8.1776085156E+02 |
| 21 | 57 | 2.2395485475E+00 | 1.1500004053E+02 | -8.1776082075E+02 |
| 21 | 58 | 2.2395485475E+00 | 1.1550004053E+02 | -8.1776078915E+02 |
| 21 | 59 | 2.2395485475E+00 | 1.1600004053E+02 | -8.1776075691E+02 |
| 21 | 60 | 2.2395485475E+00 | 1.1650004053E+02 | -8.1776072391E+02 |
| 21 | 61 | 2.2395485475E+00 | 1.1700004053E+02 | -8.1776069036E+02 |
| 22 | 1  | 2.2495485475E+00 | 8.7000040532E+01 | -8.1776190727E+02 |
| 22 | 2  | 2.2495485475E+00 | 8.7500040532E+01 | -8.1776191447E+02 |
| 22 | 3  | 2.2495485475E+00 | 8.8000040532E+01 | -8.1776194308E+02 |
| 22 | 4  | 2.2495485475E+00 | 8.8500040532E+01 | -8.1776195481E+02 |
| 22 | 5  | 2.2495485475E+00 | 8.9000040532E+01 | -8.1776196277E+02 |
| 22 | 6  | 2.2495485475E+00 | 8.9500040532E+01 | -8.1776195405E+02 |
| 22 | 7  | 2.2495485475E+00 | 9.0000040532E+01 | -8.1776192622E+02 |
| 22 | 8  | 2.2495485475E+00 | 9.0500040532E+01 | -8.1776196199E+02 |
| 22 | 9  | 2.2495485475E+00 | 9.1000040532E+01 | -8.1776191919E+02 |
| 22 | 10 | 2.2495485475E+00 | 9.1500040532E+01 | -8.1776195082E+02 |
| 22 | 11 | 2.2495485475E+00 | 9.2000040532E+01 | -8.1776190299E+02 |
| 22 | 12 | 2.2495485475E+00 | 9.2500040532E+01 | -8.1776192604E+02 |
| 22 | 13 | 2.2495485475E+00 | 9.3000040532E+01 | -8.1776187765E+02 |
| 22 | 14 | 2.2495485475E+00 | 9.3500040532E+01 | -8.1776187913E+02 |
| 22 | 15 | 2.2495485475E+00 | 9.4000040532E+01 | -8.1776184377E+02 |
| 22 | 16 | 2.2495485475E+00 | 9.4500040532E+01 | -8.1776184901E+02 |
| 22 | 17 | 2.2495485475E+00 | 9.5000040532E+01 | -8.1776180262E+02 |
| 22 | 18 | 2.2495485475E+00 | 9.5500040532E+01 | -8.1776180253E+02 |
| 22 | 19 | 2.2495485475E+00 | 9.6000040532E+01 | -8.1776175439E+02 |
| 22 | 20 | 2.2495485475E+00 | 9.6500040532E+01 | -8.1776175021E+02 |
| 22 | 21 | 2.2495485475E+00 | 9.7000040532E+01 | -8.1776170003E+02 |
| 22 | 22 | 2.2495485475E+00 | 9.7500040532E+01 | -8.1776168173E+02 |
| 22 | 23 | 2.2495485475E+00 | 9.8000040532E+01 | -8.1776166718E+02 |
| 22 | 24 | 2.2495485475E+00 | 9.8500040532E+01 | -8.1776158775E+02 |
| 22 | 25 | 2.2495485475E+00 | 9.9000040532E+01 | -8.1776160332E+02 |

|    |    |                  |                  |                   |
|----|----|------------------|------------------|-------------------|
| 22 | 26 | 2.2495485475E+00 | 9.9500040532E+01 | -8.1776154309E+02 |
| 22 | 27 | 2.2495485475E+00 | 1.0000004053E+02 | -8.1776154049E+02 |
| 22 | 28 | 2.2495485475E+00 | 1.0050004053E+02 | -8.1776149159E+02 |
| 22 | 29 | 2.2495485475E+00 | 1.0100004053E+02 | -8.1776147909E+02 |
| 22 | 30 | 2.2495485475E+00 | 1.0150004053E+02 | -8.1776141887E+02 |
| 22 | 31 | 2.2495485475E+00 | 1.0200004053E+02 | -8.1776141173E+02 |
| 22 | 32 | 2.2495485475E+00 | 1.0250004053E+02 | -8.1776137872E+02 |
| 22 | 33 | 2.2495485475E+00 | 1.0300004053E+02 | -8.1776134059E+02 |
| 22 | 34 | 2.2495485475E+00 | 1.0350004053E+02 | -8.1776131802E+02 |
| 22 | 35 | 2.2495485475E+00 | 1.0400004053E+02 | -8.1776125183E+02 |
| 22 | 36 | 2.2495485475E+00 | 1.0450004053E+02 | -8.1776124893E+02 |
| 22 | 37 | 2.2495485475E+00 | 1.0500004053E+02 | -8.1776114887E+02 |
| 22 | 38 | 2.2495485475E+00 | 1.0550004053E+02 | -8.1776118556E+02 |
| 22 | 39 | 2.2495485475E+00 | 1.0600004053E+02 | -8.1776107532E+02 |
| 22 | 40 | 2.2495485475E+00 | 1.0650004053E+02 | -8.1776110986E+02 |
| 22 | 41 | 2.2495485475E+00 | 1.0700004053E+02 | -8.1776102242E+02 |
| 22 | 42 | 2.2495485475E+00 | 1.0750004053E+02 | -8.1776103926E+02 |
| 22 | 43 | 2.2495485475E+00 | 1.0800004053E+02 | -8.1776095806E+02 |
| 22 | 44 | 2.2495485475E+00 | 1.0850004053E+02 | -8.1776097224E+02 |
| 22 | 45 | 2.2495485475E+00 | 1.0900004053E+02 | -8.1776089747E+02 |
| 22 | 46 | 2.2495485475E+00 | 1.0950004053E+02 | -8.1776091419E+02 |
| 22 | 47 | 2.2495485475E+00 | 1.1000004053E+02 | -8.1776083039E+02 |
| 22 | 48 | 2.2495485475E+00 | 1.1050004053E+02 | -8.1776098781E+02 |
| 22 | 49 | 2.2495485475E+00 | 1.1100004053E+02 | -8.1776096098E+02 |
| 22 | 50 | 2.2495485475E+00 | 1.1150004053E+02 | -8.1776093403E+02 |
| 22 | 51 | 2.2495485475E+00 | 1.1200004053E+02 | -8.1776090626E+02 |
| 22 | 52 | 2.2495485475E+00 | 1.1250004053E+02 | -8.1776087816E+02 |
| 22 | 53 | 2.2495485475E+00 | 1.1300004053E+02 | -8.1776084962E+02 |
| 22 | 54 | 2.2495485475E+00 | 1.1350004053E+02 | -8.1776082037E+02 |
| 22 | 55 | 2.2495485475E+00 | 1.1400004053E+02 | -8.1776079077E+02 |
| 22 | 56 | 2.2495485475E+00 | 1.1450004053E+02 | -8.1776076034E+02 |
| 22 | 57 | 2.2495485475E+00 | 1.1500004053E+02 | -8.1776072932E+02 |
| 22 | 58 | 2.2495485475E+00 | 1.1550004053E+02 | -8.1776069747E+02 |
| 22 | 59 | 2.2495485475E+00 | 1.1600004053E+02 | -8.1776066500E+02 |
| 22 | 60 | 2.2495485475E+00 | 1.1650004053E+02 | -8.1776063179E+02 |
| 22 | 61 | 2.2495485475E+00 | 1.1700004053E+02 | -8.1776059802E+02 |
| 23 | 1  | 2.2595485475E+00 | 8.7000040532E+01 | -8.1776176403E+02 |
| 23 | 2  | 2.2595485475E+00 | 8.7500040532E+01 | -8.1776178537E+02 |
| 23 | 3  | 2.2595485475E+00 | 8.8000040532E+01 | -8.1776179983E+02 |
| 23 | 4  | 2.2595485475E+00 | 8.8500040532E+01 | -8.1776181572E+02 |
| 23 | 5  | 2.2595485475E+00 | 8.9000040532E+01 | -8.1776181939E+02 |
| 23 | 6  | 2.2595485475E+00 | 8.9500040532E+01 | -8.1776182425E+02 |
| 23 | 7  | 2.2595485475E+00 | 9.0000040532E+01 | -8.1776178081E+02 |
| 23 | 8  | 2.2595485475E+00 | 9.0500040532E+01 | -8.1776182487E+02 |
| 23 | 9  | 2.2595485475E+00 | 9.1000040532E+01 | -8.1776177307E+02 |
| 23 | 10 | 2.2595485475E+00 | 9.1500040532E+01 | -8.1776181017E+02 |
| 23 | 11 | 2.2595485475E+00 | 9.2000040532E+01 | -8.1776175609E+02 |
| 23 | 12 | 2.2595485475E+00 | 9.2500040532E+01 | -8.1776178510E+02 |
| 23 | 13 | 2.2595485475E+00 | 9.3000040532E+01 | -8.1776173061E+02 |
| 23 | 14 | 2.2595485475E+00 | 9.3500040532E+01 | -8.1776174821E+02 |
| 23 | 15 | 2.2595485475E+00 | 9.4000040532E+01 | -8.1776169630E+02 |
| 23 | 16 | 2.2595485475E+00 | 9.4500040532E+01 | -8.1776171139E+02 |

|    |    |                  |                  |                   |
|----|----|------------------|------------------|-------------------|
| 23 | 17 | 2.2595485475E+00 | 9.5000040532E+01 | -8.1776165620E+02 |
| 23 | 18 | 2.2595485475E+00 | 9.5500040532E+01 | -8.1776166489E+02 |
| 23 | 19 | 2.2595485475E+00 | 9.6000040532E+01 | -8.1776160773E+02 |
| 23 | 20 | 2.2595485475E+00 | 9.6500040532E+01 | -8.1776161270E+02 |
| 23 | 21 | 2.2595485475E+00 | 9.7000040532E+01 | -8.1776155375E+02 |
| 23 | 22 | 2.2595485475E+00 | 9.7500040532E+01 | -8.1776155078E+02 |
| 23 | 23 | 2.2595485475E+00 | 9.8000040532E+01 | -8.1776152554E+02 |
| 23 | 24 | 2.2595485475E+00 | 9.8500040532E+01 | -8.1776146573E+02 |
| 23 | 25 | 2.2595485475E+00 | 9.9000040532E+01 | -8.1776145195E+02 |
| 23 | 26 | 2.2595485475E+00 | 9.9500040532E+01 | -8.1776141504E+02 |
| 23 | 27 | 2.2595485475E+00 | 1.0000004053E+02 | -8.1776138974E+02 |
| 23 | 28 | 2.2595485475E+00 | 1.0050004053E+02 | -8.1776134460E+02 |
| 23 | 29 | 2.2595485475E+00 | 1.0100004053E+02 | -8.1776133849E+02 |
| 23 | 30 | 2.2595485475E+00 | 1.0150004053E+02 | -8.1776130337E+02 |
| 23 | 31 | 2.2595485475E+00 | 1.0200004053E+02 | -8.1776126855E+02 |
| 23 | 32 | 2.2595485475E+00 | 1.0250004053E+02 | -8.1776123269E+02 |
| 23 | 33 | 2.2595485475E+00 | 1.0300004053E+02 | -8.1776119802E+02 |
| 23 | 34 | 2.2595485475E+00 | 1.0350004053E+02 | -8.1776119248E+02 |
| 23 | 35 | 2.2595485475E+00 | 1.0400004053E+02 | -8.1776112748E+02 |
| 23 | 36 | 2.2595485475E+00 | 1.0450004053E+02 | -8.1776112924E+02 |
| 23 | 37 | 2.2595485475E+00 | 1.0500004053E+02 | -8.1776100187E+02 |
| 23 | 38 | 2.2595485475E+00 | 1.0550004053E+02 | -8.1776105669E+02 |
| 23 | 39 | 2.2595485475E+00 | 1.0600004053E+02 | -8.1776093101E+02 |
| 23 | 40 | 2.2595485475E+00 | 1.0650004053E+02 | -8.1776099110E+02 |
| 23 | 41 | 2.2595485475E+00 | 1.0700004053E+02 | -8.1776088083E+02 |
| 23 | 42 | 2.2595485475E+00 | 1.0750004053E+02 | -8.1776092087E+02 |
| 23 | 43 | 2.2595485475E+00 | 1.0800004053E+02 | -8.1776081640E+02 |
| 23 | 44 | 2.2595485475E+00 | 1.0850004053E+02 | -8.1776085462E+02 |
| 23 | 45 | 2.2595485475E+00 | 1.0900004053E+02 | -8.1776075698E+02 |
| 23 | 46 | 2.2595485475E+00 | 1.0950004053E+02 | -8.1776078561E+02 |
| 23 | 47 | 2.2595485475E+00 | 1.1000004053E+02 | -8.1776068079E+02 |
| 23 | 48 | 2.2595485475E+00 | 1.1050004053E+02 | -8.1776087515E+02 |
| 23 | 49 | 2.2595485475E+00 | 1.1100004053E+02 | -8.1776084885E+02 |
| 23 | 50 | 2.2595485475E+00 | 1.1150004053E+02 | -8.1776082183E+02 |
| 23 | 51 | 2.2595485475E+00 | 1.1200004053E+02 | -8.1776079456E+02 |
| 23 | 52 | 2.2595485475E+00 | 1.1250004053E+02 | -8.1776076646E+02 |
| 23 | 53 | 2.2595485475E+00 | 1.1300004053E+02 | -8.1776073801E+02 |
| 23 | 54 | 2.2595485475E+00 | 1.1350004053E+02 | -8.1776070869E+02 |
| 23 | 55 | 2.2595485475E+00 | 1.1400004053E+02 | -8.1776067892E+02 |
| 23 | 56 | 2.2595485475E+00 | 1.1450004053E+02 | -8.1776064827E+02 |
| 23 | 57 | 2.2595485475E+00 | 1.1500004053E+02 | -8.1776061719E+02 |
| 23 | 58 | 2.2595485475E+00 | 1.1550004053E+02 | -8.1776058517E+02 |
| 23 | 59 | 2.2595485475E+00 | 1.1600004053E+02 | -8.1776055255E+02 |
| 23 | 60 | 2.2595485475E+00 | 1.1650004053E+02 | -8.1776051917E+02 |
| 23 | 61 | 2.2595485475E+00 | 1.1700004053E+02 | -8.1776048518E+02 |
| 24 | 1  | 2.2695485475E+00 | 8.7000040532E+01 | -8.1776158947E+02 |
| 24 | 2  | 2.2695485475E+00 | 8.7500040532E+01 | -8.1776162459E+02 |
| 24 | 3  | 2.2695485475E+00 | 8.8000040532E+01 | -8.1776162505E+02 |
| 24 | 4  | 2.2695485475E+00 | 8.8500040532E+01 | -8.1776165170E+02 |
| 24 | 5  | 2.2695485475E+00 | 8.9000040532E+01 | -8.1776165928E+02 |
| 24 | 6  | 2.2695485475E+00 | 8.9500040532E+01 | -8.1776166309E+02 |
| 24 | 7  | 2.2695485475E+00 | 9.0000040532E+01 | -8.1776166339E+02 |

|    |    |                  |                  |                   |
|----|----|------------------|------------------|-------------------|
| 24 | 8  | 2.2695485475E+00 | 9.0500040532E+01 | -8.1776165710E+02 |
| 24 | 9  | 2.2695485475E+00 | 9.1000040532E+01 | -8.1776160094E+02 |
| 24 | 10 | 2.2695485475E+00 | 9.1500040532E+01 | -8.1776164542E+02 |
| 24 | 11 | 2.2695485475E+00 | 9.2000040532E+01 | -8.1776158735E+02 |
| 24 | 12 | 2.2695485475E+00 | 9.2500040532E+01 | -8.1776160635E+02 |
| 24 | 13 | 2.2695485475E+00 | 9.3000040532E+01 | -8.1776156092E+02 |
| 24 | 14 | 2.2695485475E+00 | 9.3500040532E+01 | -8.1776158713E+02 |
| 24 | 15 | 2.2695485475E+00 | 9.4000040532E+01 | -8.1776156757E+02 |
| 24 | 16 | 2.2695485475E+00 | 9.4500040532E+01 | -8.1776153165E+02 |
| 24 | 17 | 2.2695485475E+00 | 9.5000040532E+01 | -8.1776009516E+02 |
| 24 | 18 | 2.2695485475E+00 | 9.5500040532E+01 | -8.1776148419E+02 |
| 24 | 19 | 2.2695485475E+00 | 9.6000040532E+01 | -8.1776143650E+02 |
| 24 | 20 | 2.2695485475E+00 | 9.6500040532E+01 | -8.1776143235E+02 |
| 24 | 21 | 2.2695485475E+00 | 9.7000040532E+01 | -8.1776138432E+02 |
| 24 | 22 | 2.2695485475E+00 | 9.7500040532E+01 | -8.1776139002E+02 |
| 24 | 23 | 2.2695485475E+00 | 9.8000040532E+01 | -8.1776136047E+02 |
| 24 | 24 | 2.2695485475E+00 | 9.8500040532E+01 | -8.1776131391E+02 |
| 24 | 25 | 2.2695485475E+00 | 9.9000040532E+01 | -8.1776129996E+02 |
| 24 | 26 | 2.2695485475E+00 | 9.9500040532E+01 | -8.1776126172E+02 |
| 24 | 27 | 2.2695485475E+00 | 1.0000004053E+02 | -8.1776123865E+02 |
| 24 | 28 | 2.2695485475E+00 | 1.0050004053E+02 | -8.1776120600E+02 |
| 24 | 29 | 2.2695485475E+00 | 1.0100004053E+02 | -8.1776117240E+02 |
| 24 | 30 | 2.2695485475E+00 | 1.0150004053E+02 | -8.1776115825E+02 |
| 24 | 31 | 2.2695485475E+00 | 1.0200004053E+02 | -8.1776109613E+02 |
| 24 | 32 | 2.2695485475E+00 | 1.0250004053E+02 | -8.1776109956E+02 |
| 24 | 33 | 2.2695485475E+00 | 1.0300004053E+02 | -8.1776102630E+02 |
| 24 | 34 | 2.2695485475E+00 | 1.0350004053E+02 | -8.1776104710E+02 |
| 24 | 35 | 2.2695485475E+00 | 1.0400004053E+02 | -8.1776096694E+02 |
| 24 | 36 | 2.2695485475E+00 | 1.0450004053E+02 | -8.1776098486E+02 |
| 24 | 37 | 2.2695485475E+00 | 1.0500004053E+02 | -8.1776083262E+02 |
| 24 | 38 | 2.2695485475E+00 | 1.0550004053E+02 | -8.1776091859E+02 |
| 24 | 39 | 2.2695485475E+00 | 1.0600004053E+02 | -8.1776076267E+02 |
| 24 | 40 | 2.2695485475E+00 | 1.0650004053E+02 | -8.1776084342E+02 |
| 24 | 41 | 2.2695485475E+00 | 1.0700004053E+02 | -8.1776071129E+02 |
| 24 | 42 | 2.2695485475E+00 | 1.0750004053E+02 | -8.1776077842E+02 |
| 24 | 43 | 2.2695485475E+00 | 1.0800004053E+02 | -8.1776064899E+02 |
| 24 | 44 | 2.2695485475E+00 | 1.0850004053E+02 | -8.1776071246E+02 |
| 24 | 45 | 2.2695485475E+00 | 1.0900004053E+02 | -8.1776059111E+02 |
| 24 | 46 | 2.2695485475E+00 | 1.0950004053E+02 | -8.1776065306E+02 |
| 24 | 47 | 2.2695485475E+00 | 1.1000004053E+02 | -8.1776053333E+02 |
| 24 | 48 | 2.2695485475E+00 | 1.1050004053E+02 | -8.1776074416E+02 |
| 24 | 49 | 2.2695485475E+00 | 1.1100004053E+02 | -8.1776071848E+02 |
| 24 | 50 | 2.2695485475E+00 | 1.1150004053E+02 | -8.1776069170E+02 |
| 24 | 51 | 2.2695485475E+00 | 1.1200004053E+02 | -8.1776066477E+02 |
| 24 | 52 | 2.2695485475E+00 | 1.1250004053E+02 | -8.1776063646E+02 |
| 24 | 53 | 2.2695485475E+00 | 1.1300004053E+02 | -8.1776060801E+02 |
| 24 | 54 | 2.2695485475E+00 | 1.1350004053E+02 | -8.1776057865E+02 |
| 24 | 55 | 2.2695485475E+00 | 1.1400004053E+02 | -8.1776054883E+02 |
| 24 | 56 | 2.2695485475E+00 | 1.1450004053E+02 | -8.1776051805E+02 |
| 24 | 57 | 2.2695485475E+00 | 1.1500004053E+02 | -8.1776048688E+02 |
| 24 | 58 | 2.2695485475E+00 | 1.1550004053E+02 | -8.1776045471E+02 |
| 24 | 59 | 2.2695485475E+00 | 1.1600004053E+02 | -8.1776042205E+02 |



|    |    |                  |                  |                   |
|----|----|------------------|------------------|-------------------|
| 24 | 60 | 2.2695485475E+00 | 1.1650004053E+02 | -8.1776038855E+02 |
| 24 | 61 | 2.2695485475E+00 | 1.1700004053E+02 | -8.1776035447E+02 |
| 25 | 1  | 2.2795485475E+00 | 8.7000040532E+01 | -8.1776141746E+02 |
| 25 | 2  | 2.2795485475E+00 | 8.7500040532E+01 | -8.1776143752E+02 |
| 25 | 3  | 2.2795485475E+00 | 8.8000040532E+01 | -8.1776145302E+02 |
| 25 | 4  | 2.2795485475E+00 | 8.8500040532E+01 | -8.1776146460E+02 |
| 25 | 5  | 2.2795485475E+00 | 8.9000040532E+01 | -8.1776147221E+02 |
| 25 | 6  | 2.2795485475E+00 | 8.9500040532E+01 | -8.1776147276E+02 |
| 25 | 7  | 2.2795485475E+00 | 9.0000040532E+01 | -8.1776147630E+02 |
| 25 | 8  | 2.2795485475E+00 | 9.0500040532E+01 | -8.1776147320E+02 |
| 25 | 9  | 2.2795485475E+00 | 9.1000040532E+01 | -8.1776146719E+02 |
| 25 | 10 | 2.2795485475E+00 | 9.1500040532E+01 | -8.1776144449E+02 |
| 25 | 11 | 2.2795485475E+00 | 9.2000040532E+01 | -8.1776144701E+02 |
| 25 | 12 | 2.2795485475E+00 | 9.2500040532E+01 | -8.1776142970E+02 |
| 25 | 13 | 2.2795485475E+00 | 9.3000040532E+01 | -8.1776141784E+02 |
| 25 | 14 | 2.2795485475E+00 | 9.3500040532E+01 | -8.1776138520E+02 |
| 25 | 15 | 2.2795485475E+00 | 9.4000040532E+01 | -8.1776137783E+02 |
| 25 | 16 | 2.2795485475E+00 | 9.4500040532E+01 | -8.1776135572E+02 |
| 25 | 17 | 2.2795485475E+00 | 9.5000040532E+01 | -8.1776129535E+02 |
| 25 | 18 | 2.2795485475E+00 | 9.5500040532E+01 | -8.1776130842E+02 |
| 25 | 19 | 2.2795485475E+00 | 9.6000040532E+01 | -8.1776128738E+02 |
| 25 | 20 | 2.2795485475E+00 | 9.6500040532E+01 | -8.1776125572E+02 |
| 25 | 21 | 2.2795485475E+00 | 9.7000040532E+01 | -8.1776123206E+02 |
| 25 | 22 | 2.2795485475E+00 | 9.7500040532E+01 | -8.1776117290E+02 |
| 25 | 23 | 2.2795485475E+00 | 9.8000040532E+01 | -8.1776117405E+02 |
| 25 | 24 | 2.2795485475E+00 | 9.8500040532E+01 | -8.1776112182E+02 |
| 25 | 25 | 2.2795485475E+00 | 9.9000040532E+01 | -8.1776111132E+02 |
| 25 | 26 | 2.2795485475E+00 | 9.9500040532E+01 | -8.1776107114E+02 |
| 25 | 27 | 2.2795485475E+00 | 1.0000004053E+02 | -8.1776105093E+02 |
| 25 | 28 | 2.2795485475E+00 | 1.0050004053E+02 | -8.1776103961E+02 |
| 25 | 29 | 2.2795485475E+00 | 1.0100004053E+02 | -8.1776097860E+02 |
| 25 | 30 | 2.2795485475E+00 | 1.0150004053E+02 | -8.1776099058E+02 |
| 25 | 31 | 2.2795485475E+00 | 1.0200004053E+02 | -8.1776092867E+02 |
| 25 | 32 | 2.2795485475E+00 | 1.0250004053E+02 | -8.1776093874E+02 |
| 25 | 33 | 2.2795485475E+00 | 1.0300004053E+02 | -8.1776085987E+02 |
| 25 | 34 | 2.2795485475E+00 | 1.0350004053E+02 | -8.1776088395E+02 |
| 25 | 35 | 2.2795485475E+00 | 1.0400004053E+02 | -8.1776078778E+02 |
| 25 | 36 | 2.2795485475E+00 | 1.0450004053E+02 | -8.1776082408E+02 |
| 25 | 37 | 2.2795485475E+00 | 1.0500004053E+02 | -8.1776063895E+02 |
| 25 | 38 | 2.2795485475E+00 | 1.0550004053E+02 | -8.1776075893E+02 |
| 25 | 39 | 2.2795485475E+00 | 1.0600004053E+02 | -8.1776057398E+02 |
| 25 | 40 | 2.2795485475E+00 | 1.0650004053E+02 | -8.1776069024E+02 |
| 25 | 41 | 2.2795485475E+00 | 1.0700004053E+02 | -8.1776052425E+02 |
| 25 | 42 | 2.2795485475E+00 | 1.0750004053E+02 | -8.1776062041E+02 |
| 25 | 43 | 2.2795485475E+00 | 1.0800004053E+02 | -8.1776045406E+02 |
| 25 | 44 | 2.2795485475E+00 | 1.0850004053E+02 | -8.1776054511E+02 |
| 25 | 45 | 2.2795485475E+00 | 1.0900004053E+02 | -8.1776039698E+02 |
| 25 | 46 | 2.2795485475E+00 | 1.0950004053E+02 | -8.1776048482E+02 |
| 25 | 47 | 2.2795485475E+00 | 1.1000004053E+02 | -8.1776034927E+02 |
| 25 | 48 | 2.2795485475E+00 | 1.1050004053E+02 | -8.1776059237E+02 |
| 25 | 49 | 2.2795485475E+00 | 1.1100004053E+02 | -8.1776057232E+02 |
| 25 | 50 | 2.2795485475E+00 | 1.1150004053E+02 | -8.1776054545E+02 |

|    |    |                  |                  |                   |
|----|----|------------------|------------------|-------------------|
| 25 | 51 | 2.2795485475E+00 | 1.1200004053E+02 | -8.1776051861E+02 |
| 25 | 52 | 2.2795485475E+00 | 1.1250004053E+02 | -8.1776049055E+02 |
| 25 | 53 | 2.2795485475E+00 | 1.1300004053E+02 | -8.1776046218E+02 |
| 25 | 54 | 2.2795485475E+00 | 1.1350004053E+02 | -8.1776043273E+02 |
| 25 | 55 | 2.2795485475E+00 | 1.1400004053E+02 | -8.1776040287E+02 |
| 25 | 56 | 2.2795485475E+00 | 1.1450004053E+02 | -8.1776037206E+02 |
| 25 | 57 | 2.2795485475E+00 | 1.1500004053E+02 | -8.1776034072E+02 |
| 25 | 58 | 2.2795485475E+00 | 1.1550004053E+02 | -8.1776030859E+02 |
| 25 | 59 | 2.2795485475E+00 | 1.1600004053E+02 | -8.1776027587E+02 |
| 25 | 60 | 2.2795485475E+00 | 1.1650004053E+02 | -8.1776024233E+02 |
| 25 | 61 | 2.2795485475E+00 | 1.1700004053E+02 | -8.1776020817E+02 |
| 26 | 1  | 2.2895485475E+00 | 8.7000040532E+01 | -8.1776120460E+02 |
| 26 | 2  | 2.2895485475E+00 | 8.7500040532E+01 | -8.1776122859E+02 |
| 26 | 3  | 2.2895485475E+00 | 8.8000040532E+01 | -8.1776124432E+02 |
| 26 | 4  | 2.2895485475E+00 | 8.8500040532E+01 | -8.1776125588E+02 |
| 26 | 5  | 2.2895485475E+00 | 8.9000040532E+01 | -8.1776126358E+02 |
| 26 | 6  | 2.2895485475E+00 | 8.9500040532E+01 | -8.1776126740E+02 |
| 26 | 7  | 2.2895485475E+00 | 9.0000040532E+01 | -8.1776126425E+02 |
| 26 | 8  | 2.2895485475E+00 | 9.0500040532E+01 | -8.1776125156E+02 |
| 26 | 9  | 2.2895485475E+00 | 9.1000040532E+01 | -8.1776125563E+02 |
| 26 | 10 | 2.2895485475E+00 | 9.1500040532E+01 | -8.1776124674E+02 |
| 26 | 11 | 2.2895485475E+00 | 9.2000040532E+01 | -8.1776123579E+02 |
| 26 | 12 | 2.2895485475E+00 | 9.2500040532E+01 | -8.1776122566E+02 |
| 26 | 13 | 2.2895485475E+00 | 9.3000040532E+01 | -8.1776120714E+02 |
| 26 | 14 | 2.2895485475E+00 | 9.3500040532E+01 | -8.1776118888E+02 |
| 26 | 15 | 2.2895485475E+00 | 9.4000040532E+01 | -8.1776116084E+02 |
| 26 | 16 | 2.2895485475E+00 | 9.4500040532E+01 | -8.1776115291E+02 |
| 26 | 17 | 2.2895485475E+00 | 9.5000040532E+01 | -8.1776113012E+02 |
| 26 | 18 | 2.2895485475E+00 | 9.5500040532E+01 | -8.1776110586E+02 |
| 26 | 19 | 2.2895485475E+00 | 9.6000040532E+01 | -8.1776107763E+02 |
| 26 | 20 | 2.2895485475E+00 | 9.6500040532E+01 | -8.1776105335E+02 |
| 26 | 21 | 2.2895485475E+00 | 9.7000040532E+01 | -8.1776102579E+02 |
| 26 | 22 | 2.2895485475E+00 | 9.7500040532E+01 | -8.1776098902E+02 |
| 26 | 23 | 2.2895485475E+00 | 9.8000040532E+01 | -8.1776096853E+02 |
| 26 | 24 | 2.2895485475E+00 | 9.8500040532E+01 | -8.1776094135E+02 |
| 26 | 25 | 2.2895485475E+00 | 9.9000040532E+01 | -8.1776089677E+02 |
| 26 | 26 | 2.2895485475E+00 | 9.9500040532E+01 | -8.1776089445E+02 |
| 26 | 27 | 2.2895485475E+00 | 1.0000004053E+02 | -8.1776083791E+02 |
| 26 | 28 | 2.2895485475E+00 | 1.0050004053E+02 | -8.1776085198E+02 |
| 26 | 29 | 2.2895485475E+00 | 1.0100004053E+02 | -8.1776079168E+02 |
| 26 | 30 | 2.2895485475E+00 | 1.0150004053E+02 | -8.1776078213E+02 |
| 26 | 31 | 2.2895485475E+00 | 1.0200004053E+02 | -8.1776072533E+02 |
| 26 | 32 | 2.2895485475E+00 | 1.0250004053E+02 | -8.1776075768E+02 |
| 26 | 33 | 2.2895485475E+00 | 1.0300004053E+02 | -8.1776073295E+02 |
| 26 | 34 | 2.2895485475E+00 | 1.0350004053E+02 | -8.1776070558E+02 |
| 26 | 35 | 2.2895485475E+00 | 1.0400004053E+02 | -8.1776067795E+02 |
| 26 | 36 | 2.2895485475E+00 | 1.0450004053E+02 | -8.1776064820E+02 |
| 26 | 37 | 2.2895485475E+00 | 1.0500004053E+02 | -8.1776043364E+02 |
| 26 | 38 | 2.2895485475E+00 | 1.0550004053E+02 | -8.1776058555E+02 |
| 26 | 39 | 2.2895485475E+00 | 1.0600004053E+02 | -8.1776036702E+02 |
| 26 | 40 | 2.2895485475E+00 | 1.0650004053E+02 | -8.1776051392E+02 |
| 26 | 41 | 2.2895485475E+00 | 1.0700004053E+02 | -8.1776031503E+02 |

|    |    |                  |                  |                   |
|----|----|------------------|------------------|-------------------|
| 26 | 42 | 2.2895485475E+00 | 1.0750004053E+02 | -8.1776045772E+02 |
| 26 | 43 | 2.2895485475E+00 | 1.0800004053E+02 | -8.1776026675E+02 |
| 26 | 44 | 2.2895485475E+00 | 1.0850004053E+02 | -8.1776039424E+02 |
| 26 | 45 | 2.2895485475E+00 | 1.0900004053E+02 | -8.1776021391E+02 |
| 26 | 46 | 2.2895485475E+00 | 1.0950004053E+02 | -8.1776033165E+02 |
| 26 | 47 | 2.2895485475E+00 | 1.1000004053E+02 | -8.1776013986E+02 |
| 26 | 48 | 2.2895485475E+00 | 1.1050004053E+02 | -8.1776044045E+02 |
| 26 | 49 | 2.2895485475E+00 | 1.1100004053E+02 | -8.1776041023E+02 |
| 26 | 50 | 2.2895485475E+00 | 1.1150004053E+02 | -8.1776037851E+02 |
| 26 | 51 | 2.2895485475E+00 | 1.1200004053E+02 | -8.1776035909E+02 |
| 26 | 52 | 2.2895485475E+00 | 1.1250004053E+02 | -8.1776033117E+02 |
| 26 | 53 | 2.2895485475E+00 | 1.1300004053E+02 | -8.1776030285E+02 |
| 26 | 54 | 2.2895485475E+00 | 1.1350004053E+02 | -8.1776027339E+02 |
| 26 | 55 | 2.2895485475E+00 | 1.1400004053E+02 | -8.1776024345E+02 |
| 26 | 56 | 2.2895485475E+00 | 1.1450004053E+02 | -8.1776021269E+02 |
| 26 | 57 | 2.2895485475E+00 | 1.1500004053E+02 | -8.1776018138E+02 |
| 26 | 58 | 2.2895485475E+00 | 1.1550004053E+02 | -8.1776014919E+02 |
| 26 | 59 | 2.2895485475E+00 | 1.1600004053E+02 | -8.1776011653E+02 |
| 26 | 60 | 2.2895485475E+00 | 1.1650004053E+02 | -8.1776008299E+02 |
| 26 | 61 | 2.2895485475E+00 | 1.1700004053E+02 | -8.1776004895E+02 |
| 27 | 1  | 2.2995485475E+00 | 8.7000040532E+01 | -8.1776097894E+02 |
| 27 | 2  | 2.2995485475E+00 | 8.7500040532E+01 | -8.1776099923E+02 |
| 27 | 3  | 2.2995485475E+00 | 8.8000040532E+01 | -8.1776101519E+02 |
| 27 | 4  | 2.2995485475E+00 | 8.8500040532E+01 | -8.1776102697E+02 |
| 27 | 5  | 2.2995485475E+00 | 8.9000040532E+01 | -8.1776103487E+02 |
| 27 | 6  | 2.2995485475E+00 | 8.9500040532E+01 | -8.1776102506E+02 |
| 27 | 7  | 2.2995485475E+00 | 9.0000040532E+01 | -8.1776102632E+02 |
| 27 | 8  | 2.2995485475E+00 | 9.0500040532E+01 | -8.1776103330E+02 |
| 27 | 9  | 2.2995485475E+00 | 9.1000040532E+01 | -8.1776101799E+02 |
| 27 | 10 | 2.2995485475E+00 | 9.1500040532E+01 | -8.1776102289E+02 |
| 27 | 11 | 2.2995485475E+00 | 9.2000040532E+01 | -8.1776099875E+02 |
| 27 | 12 | 2.2995485475E+00 | 9.2500040532E+01 | -8.1776098401E+02 |
| 27 | 13 | 2.2995485475E+00 | 9.3000040532E+01 | -8.1776097040E+02 |
| 27 | 14 | 2.2995485475E+00 | 9.3500040532E+01 | -8.1776096681E+02 |
| 27 | 15 | 2.2995485475E+00 | 9.4000040532E+01 | -8.1776094819E+02 |
| 27 | 16 | 2.2995485475E+00 | 9.4500040532E+01 | -8.1776091049E+02 |
| 27 | 17 | 2.2995485475E+00 | 9.5000040532E+01 | -8.1776090506E+02 |
| 27 | 18 | 2.2995485475E+00 | 9.5500040532E+01 | -8.1776085068E+02 |
| 27 | 19 | 2.2995485475E+00 | 9.6000040532E+01 | -8.1776084260E+02 |
| 27 | 20 | 2.2995485475E+00 | 9.6500040532E+01 | -8.1776080727E+02 |
| 27 | 21 | 2.2995485475E+00 | 9.7000040532E+01 | -8.1776079836E+02 |
| 27 | 22 | 2.2995485475E+00 | 9.7500040532E+01 | -8.1776078046E+02 |
| 27 | 23 | 2.2995485475E+00 | 9.8000040532E+01 | -8.1776074207E+02 |
| 27 | 24 | 2.2995485475E+00 | 9.8500040532E+01 | -8.1776073613E+02 |
| 27 | 25 | 2.2995485475E+00 | 9.9000040532E+01 | -8.1776068889E+02 |
| 27 | 26 | 2.2995485475E+00 | 9.9500040532E+01 | -8.1776069346E+02 |
| 27 | 27 | 2.2995485475E+00 | 1.0000004053E+02 | -8.1776063264E+02 |
| 27 | 28 | 2.2995485475E+00 | 1.0050004053E+02 | -8.1776062830E+02 |
| 27 | 29 | 2.2995485475E+00 | 1.0100004053E+02 | -8.1776057093E+02 |
| 27 | 30 | 2.2995485475E+00 | 1.0150004053E+02 | -8.1776060346E+02 |
| 27 | 31 | 2.2995485475E+00 | 1.0200004053E+02 | -8.1776049744E+02 |
| 27 | 32 | 2.2995485475E+00 | 1.0250004053E+02 | -8.1776056479E+02 |

|    |    |                  |                  |                   |
|----|----|------------------|------------------|-------------------|
| 27 | 33 | 2.2995485475E+00 | 1.0300004053E+02 | -8.1776053465E+02 |
| 27 | 34 | 2.2995485475E+00 | 1.0350004053E+02 | -8.1776051621E+02 |
| 27 | 35 | 2.2995485475E+00 | 1.0400004053E+02 | -8.1776048958E+02 |
| 27 | 36 | 2.2995485475E+00 | 1.0450004053E+02 | -8.1776045483E+02 |
| 27 | 37 | 2.2995485475E+00 | 1.0500004053E+02 | -8.1776020516E+02 |
| 27 | 38 | 2.2995485475E+00 | 1.0550004053E+02 | -8.1776040476E+02 |
| 27 | 39 | 2.2995485475E+00 | 1.0600004053E+02 | -8.1776014434E+02 |
| 27 | 40 | 2.2995485475E+00 | 1.0650004053E+02 | -8.1776035661E+02 |
| 27 | 41 | 2.2995485475E+00 | 1.0700004053E+02 | -8.1776008794E+02 |
| 27 | 42 | 2.2995485475E+00 | 1.0750004053E+02 | -8.1776029686E+02 |
| 27 | 43 | 2.2995485475E+00 | 1.0800004053E+02 | -8.1776012003E+02 |
| 27 | 44 | 2.2995485475E+00 | 1.0850004053E+02 | -8.1776023404E+02 |
| 27 | 45 | 2.2995485475E+00 | 1.0900004053E+02 | -8.1776000042E+02 |
| 27 | 46 | 2.2995485475E+00 | 1.0950004053E+02 | -8.1776017042E+02 |
| 27 | 47 | 2.2995485475E+00 | 1.1000004053E+02 | -8.1775994393E+02 |
| 27 | 48 | 2.2995485475E+00 | 1.1050004053E+02 | -8.1776027861E+02 |
| 27 | 49 | 2.2995485475E+00 | 1.1100004053E+02 | -8.1776024755E+02 |
| 27 | 50 | 2.2995485475E+00 | 1.1150004053E+02 | -8.1776021601E+02 |
| 27 | 51 | 2.2995485475E+00 | 1.1200004053E+02 | -8.1776018913E+02 |
| 27 | 52 | 2.2995485475E+00 | 1.1250004053E+02 | -8.1776016051E+02 |
| 27 | 53 | 2.2995485475E+00 | 1.1300004053E+02 | -8.1776013226E+02 |
| 27 | 54 | 2.2995485475E+00 | 1.1350004053E+02 | -8.1776010299E+02 |
| 27 | 55 | 2.2995485475E+00 | 1.1400004053E+02 | -8.1776007302E+02 |
| 27 | 56 | 2.2995485475E+00 | 1.1450004053E+02 | -8.1776004229E+02 |
| 27 | 57 | 2.2995485475E+00 | 1.1500004053E+02 | -8.1776001095E+02 |
| 27 | 58 | 2.2995485475E+00 | 1.1550004053E+02 | -8.1775995765E+02 |
| 27 | 59 | 2.2995485475E+00 | 1.1600004053E+02 | -8.1775994637E+02 |
| 27 | 60 | 2.2995485475E+00 | 1.1650004053E+02 | -8.1775989522E+02 |
| 27 | 61 | 2.2995485475E+00 | 1.1700004053E+02 | -8.1775987918E+02 |
| 28 | 1  | 2.3095485475E+00 | 8.7000040532E+01 | -8.1776073027E+02 |
| 28 | 2  | 2.3095485475E+00 | 8.7500040532E+01 | -8.1776075085E+02 |
| 28 | 3  | 2.3095485475E+00 | 8.8000040532E+01 | -8.1776076715E+02 |
| 28 | 4  | 2.3095485475E+00 | 8.8500040532E+01 | -8.1776076525E+02 |
| 28 | 5  | 2.3095485475E+00 | 8.9000040532E+01 | -8.1776078755E+02 |
| 28 | 6  | 2.3095485475E+00 | 8.9500040532E+01 | -8.1776078852E+02 |
| 28 | 7  | 2.3095485475E+00 | 9.0000040532E+01 | -8.1776079308E+02 |
| 28 | 8  | 2.3095485475E+00 | 9.0500040532E+01 | -8.1776079058E+02 |
| 28 | 9  | 2.3095485475E+00 | 9.1000040532E+01 | -8.1776078569E+02 |
| 28 | 10 | 2.3095485475E+00 | 9.1500040532E+01 | -8.1776076302E+02 |
| 28 | 11 | 2.3095485475E+00 | 9.2000040532E+01 | -8.1776076741E+02 |
| 28 | 12 | 2.3095485475E+00 | 9.2500040532E+01 | -8.1776075094E+02 |
| 28 | 13 | 2.3095485475E+00 | 9.3000040532E+01 | -8.1776074047E+02 |
| 28 | 14 | 2.3095485475E+00 | 9.3500040532E+01 | -8.1776070692E+02 |
| 28 | 15 | 2.3095485475E+00 | 9.4000040532E+01 | -8.1776070205E+02 |
| 28 | 16 | 2.3095485475E+00 | 9.4500040532E+01 | -8.1776068025E+02 |
| 28 | 17 | 2.3095485475E+00 | 9.5000040532E+01 | -8.1776065999E+02 |
| 28 | 18 | 2.3095485475E+00 | 9.5500040532E+01 | -8.1776062927E+02 |
| 28 | 19 | 2.3095485475E+00 | 9.6000040532E+01 | -8.1776061489E+02 |
| 28 | 20 | 2.3095485475E+00 | 9.6500040532E+01 | -8.1776059068E+02 |
| 28 | 21 | 2.3095485475E+00 | 9.7000040532E+01 | -8.1776054685E+02 |
| 28 | 22 | 2.3095485475E+00 | 9.7500040532E+01 | -8.1776053679E+02 |
| 28 | 23 | 2.3095485475E+00 | 9.8000040532E+01 | -8.1776049253E+02 |



|       |                  |                  |                   |
|-------|------------------|------------------|-------------------|
| 28 24 | 2.3095485475E+00 | 9.8500040532E+01 | -8.1776049677E+02 |
| 28 25 | 2.3095485475E+00 | 9.9000040532E+01 | -8.1776049598E+02 |
| 28 26 | 2.3095485475E+00 | 9.9500040532E+01 | -8.1776045570E+02 |
| 28 27 | 2.3095485475E+00 | 1.0000004053E+02 | -8.1776045762E+02 |
| 28 28 | 2.3095485475E+00 | 1.0050004053E+02 | -8.1776043461E+02 |
| 28 29 | 2.3095485475E+00 | 1.0100004053E+02 | -8.1776032688E+02 |
| 28 30 | 2.3095485475E+00 | 1.0150004053E+02 | -8.1776040240E+02 |
| 28 31 | 2.3095485475E+00 | 1.0200004053E+02 | -8.1776038209E+02 |
| 28 32 | 2.3095485475E+00 | 1.0250004053E+02 | -8.1776036157E+02 |
| 28 33 | 2.3095485475E+00 | 1.0300004053E+02 | -8.1776031409E+02 |
| 28 34 | 2.3095485475E+00 | 1.0350004053E+02 | -8.1776031289E+02 |
| 28 35 | 2.3095485475E+00 | 1.0400004053E+02 | -8.1776028597E+02 |
| 28 36 | 2.3095485475E+00 | 1.0450004053E+02 | -8.1776027830E+02 |
| 28 37 | 2.3095485475E+00 | 1.0500004053E+02 | -8.1775996888E+02 |
| 28 38 | 2.3095485475E+00 | 1.0550004053E+02 | -8.1776024153E+02 |
| 28 39 | 2.3095485475E+00 | 1.0600004053E+02 | -8.1775990777E+02 |
| 28 40 | 2.3095485475E+00 | 1.0650004053E+02 | -8.1776018912E+02 |
| 28 41 | 2.3095485475E+00 | 1.0700004053E+02 | -8.1775986150E+02 |
| 28 42 | 2.3095485475E+00 | 1.0750004053E+02 | -8.1776013034E+02 |
| 28 43 | 2.3095485475E+00 | 1.0800004053E+02 | -8.1776009984E+02 |
| 28 44 | 2.3095485475E+00 | 1.0850004053E+02 | -8.1776006849E+02 |
| 28 45 | 2.3095485475E+00 | 1.0900004053E+02 | -8.1776003672E+02 |
| 28 46 | 2.3095485475E+00 | 1.0950004053E+02 | -8.1776000424E+02 |
| 28 47 | 2.3095485475E+00 | 1.1000004053E+02 | -8.1775972027E+02 |
| 28 48 | 2.3095485475E+00 | 1.1050004053E+02 | -8.1776010890E+02 |
| 28 49 | 2.3095485475E+00 | 1.1100004053E+02 | -8.1776007817E+02 |
| 28 50 | 2.3095485475E+00 | 1.1150004053E+02 | -8.1776004624E+02 |
| 28 51 | 2.3095485475E+00 | 1.1200004053E+02 | -8.1776001377E+02 |
| 28 52 | 2.3095485475E+00 | 1.1250004053E+02 | -8.1775998090E+02 |
| 28 53 | 2.3095485475E+00 | 1.1300004053E+02 | -8.1775995302E+02 |
| 28 54 | 2.3095485475E+00 | 1.1350004053E+02 | -8.1775992362E+02 |
| 28 55 | 2.3095485475E+00 | 1.1400004053E+02 | -8.1775989399E+02 |
| 28 56 | 2.3095485475E+00 | 1.1450004053E+02 | -8.1775986334E+02 |
| 28 57 | 2.3095485475E+00 | 1.1500004053E+02 | -8.1775983210E+02 |
| 28 58 | 2.3095485475E+00 | 1.1550004053E+02 | -8.1775979097E+02 |
| 28 59 | 2.3095485475E+00 | 1.1600004053E+02 | -8.1775976779E+02 |
| 28 60 | 2.3095485475E+00 | 1.1650004053E+02 | -8.1775972843E+02 |
| 28 61 | 2.3095485475E+00 | 1.1700004053E+02 | -8.1775970117E+02 |
| 29 1  | 2.3195485475E+00 | 8.7000040532E+01 | -8.1776046025E+02 |
| 29 2  | 2.3195485475E+00 | 8.7500040532E+01 | -8.1776047037E+02 |
| 29 3  | 2.3195485475E+00 | 8.8000040532E+01 | -8.1776050160E+02 |
| 29 4  | 2.3195485475E+00 | 8.8500040532E+01 | -8.1776051070E+02 |
| 29 5  | 2.3195485475E+00 | 8.9000040532E+01 | -8.1776051949E+02 |
| 29 6  | 2.3195485475E+00 | 8.9500040532E+01 | -8.1776052795E+02 |
| 29 7  | 2.3195485475E+00 | 9.0000040532E+01 | -8.1776052618E+02 |
| 29 8  | 2.3195485475E+00 | 9.0500040532E+01 | -8.1776051372E+02 |
| 29 9  | 2.3195485475E+00 | 9.1000040532E+01 | -8.1776052017E+02 |
| 29 10 | 2.3195485475E+00 | 9.1500040532E+01 | -8.1776051264E+02 |
| 29 11 | 2.3195485475E+00 | 9.2000040532E+01 | -8.1776050331E+02 |
| 29 12 | 2.3195485475E+00 | 9.2500040532E+01 | -8.1776049509E+02 |
| 29 13 | 2.3195485475E+00 | 9.3000040532E+01 | -8.1776047784E+02 |
| 29 14 | 2.3195485475E+00 | 9.3500040532E+01 | -8.1776046058E+02 |

|    |    |                  |                  |                   |
|----|----|------------------|------------------|-------------------|
| 29 | 15 | 2.3195485475E+00 | 9.4000040532E+01 | -8.1776043400E+02 |
| 29 | 16 | 2.3195485475E+00 | 9.4500040532E+01 | -8.1776042785E+02 |
| 29 | 17 | 2.3195485475E+00 | 9.5000040532E+01 | -8.1776039297E+02 |
| 29 | 18 | 2.3195485475E+00 | 9.5500040532E+01 | -8.1776038562E+02 |
| 29 | 19 | 2.3195485475E+00 | 9.6000040532E+01 | -8.1776036254E+02 |
| 29 | 20 | 2.3195485475E+00 | 9.6500040532E+01 | -8.1776035247E+02 |
| 29 | 21 | 2.3195485475E+00 | 9.7000040532E+01 | -8.1776033511E+02 |
| 29 | 22 | 2.3195485475E+00 | 9.7500040532E+01 | -8.1776031523E+02 |
| 29 | 23 | 2.3195485475E+00 | 9.8000040532E+01 | -8.1776030083E+02 |
| 29 | 24 | 2.3195485475E+00 | 9.8500040532E+01 | -8.1776028160E+02 |
| 29 | 25 | 2.3195485475E+00 | 9.9000040532E+01 | -8.1776025869E+02 |
| 29 | 26 | 2.3195485475E+00 | 9.9500040532E+01 | -8.1776024791E+02 |
| 29 | 27 | 2.3195485475E+00 | 1.0000004053E+02 | -8.1776022560E+02 |
| 29 | 28 | 2.3195485475E+00 | 1.0050004053E+02 | -8.1776022032E+02 |
| 29 | 29 | 2.3195485475E+00 | 1.0100004053E+02 | -8.1776020492E+02 |
| 29 | 30 | 2.3195485475E+00 | 1.0150004053E+02 | -8.1776017258E+02 |
| 29 | 31 | 2.3195485475E+00 | 1.0200004053E+02 | -8.1776016408E+02 |
| 29 | 32 | 2.3195485475E+00 | 1.0250004053E+02 | -8.1776015550E+02 |
| 29 | 33 | 2.3195485475E+00 | 1.0300004053E+02 | -8.1776015197E+02 |
| 29 | 34 | 2.3195485475E+00 | 1.0350004053E+02 | -8.1776014067E+02 |
| 29 | 35 | 2.3195485475E+00 | 1.0400004053E+02 | -8.1776012685E+02 |
| 29 | 36 | 2.3195485475E+00 | 1.0450004053E+02 | -8.1776011020E+02 |
| 29 | 37 | 2.3195485475E+00 | 1.0500004053E+02 | -8.1776009104E+02 |
| 29 | 38 | 2.3195485475E+00 | 1.0550004053E+02 | -8.1776006154E+02 |
| 29 | 39 | 2.3195485475E+00 | 1.0600004053E+02 | -8.1775966026E+02 |
| 29 | 40 | 2.3195485475E+00 | 1.0650004053E+02 | -8.1776001836E+02 |
| 29 | 41 | 2.3195485475E+00 | 1.0700004053E+02 | -8.1775960912E+02 |
| 29 | 42 | 2.3195485475E+00 | 1.0750004053E+02 | -8.1775996071E+02 |
| 29 | 43 | 2.3195485475E+00 | 1.0800004053E+02 | -8.1775993070E+02 |
| 29 | 44 | 2.3195485475E+00 | 1.0850004053E+02 | -8.1775989977E+02 |
| 29 | 45 | 2.3195485475E+00 | 1.0900004053E+02 | -8.1775986861E+02 |
| 29 | 46 | 2.3195485475E+00 | 1.0950004053E+02 | -8.1775983578E+02 |
| 29 | 47 | 2.3195485475E+00 | 1.1000004053E+02 | -8.1775948304E+02 |
| 29 | 48 | 2.3195485475E+00 | 1.1050004053E+02 | -8.1775993365E+02 |
| 29 | 49 | 2.3195485475E+00 | 1.1100004053E+02 | -8.1775990307E+02 |
| 29 | 50 | 2.3195485475E+00 | 1.1150004053E+02 | -8.1775987141E+02 |
| 29 | 51 | 2.3195485475E+00 | 1.1200004053E+02 | -8.1775983869E+02 |
| 29 | 52 | 2.3195485475E+00 | 1.1250004053E+02 | -8.1775980507E+02 |
| 29 | 53 | 2.3195485475E+00 | 1.1300004053E+02 | -8.1775977147E+02 |
| 29 | 54 | 2.3195485475E+00 | 1.1350004053E+02 | -8.1775973823E+02 |
| 29 | 55 | 2.3195485475E+00 | 1.1400004053E+02 | -8.1775970887E+02 |
| 29 | 56 | 2.3195485475E+00 | 1.1450004053E+02 | -8.1775967734E+02 |
| 29 | 57 | 2.3195485475E+00 | 1.1500004053E+02 | -8.1775964713E+02 |
| 29 | 58 | 2.3195485475E+00 | 1.1550004053E+02 | -8.1775961891E+02 |
| 29 | 59 | 2.3195485475E+00 | 1.1600004053E+02 | -8.1775958334E+02 |
| 29 | 60 | 2.3195485475E+00 | 1.1650004053E+02 | -8.1775955624E+02 |
| 29 | 61 | 2.3195485475E+00 | 1.1700004053E+02 | -8.1775951719E+02 |
| 30 | 1  | 2.3295485475E+00 | 8.7000040532E+01 | -8.1776016697E+02 |
| 30 | 2  | 2.3295485475E+00 | 8.7500040532E+01 | -8.1776019889E+02 |
| 30 | 3  | 2.3295485475E+00 | 8.8000040532E+01 | -8.1776021991E+02 |
| 30 | 4  | 2.3295485475E+00 | 8.8500040532E+01 | -8.1776023317E+02 |
| 30 | 5  | 2.3295485475E+00 | 8.9000040532E+01 | -8.1776022918E+02 |

|    |    |                  |                  |                   |
|----|----|------------------|------------------|-------------------|
| 30 | 6  | 2.3295485475E+00 | 8.9500040532E+01 | -8.1776023408E+02 |
| 30 | 7  | 2.3295485475E+00 | 9.0000040532E+01 | -8.1776023704E+02 |
| 30 | 8  | 2.3295485475E+00 | 9.0500040532E+01 | -8.1776024665E+02 |
| 30 | 9  | 2.3295485475E+00 | 9.1000040532E+01 | -8.1776023351E+02 |
| 30 | 10 | 2.3295485475E+00 | 9.1500040532E+01 | -8.1776024056E+02 |
| 30 | 11 | 2.3295485475E+00 | 9.2000040532E+01 | -8.1776021778E+02 |
| 30 | 12 | 2.3295485475E+00 | 9.2500040532E+01 | -8.1776020302E+02 |
| 30 | 13 | 2.3295485475E+00 | 9.3000040532E+01 | -8.1776019400E+02 |
| 30 | 14 | 2.3295485475E+00 | 9.3500040532E+01 | -8.1776019299E+02 |
| 30 | 15 | 2.3295485475E+00 | 9.4000040532E+01 | -8.1776014454E+02 |
| 30 | 16 | 2.3295485475E+00 | 9.4500040532E+01 | -8.1776013554E+02 |
| 30 | 17 | 2.3295485475E+00 | 9.5000040532E+01 | -8.1776010480E+02 |
| 30 | 18 | 2.3295485475E+00 | 9.5500040532E+01 | -8.1776011030E+02 |
| 30 | 19 | 2.3295485475E+00 | 9.6000040532E+01 | -8.1776011543E+02 |
| 30 | 20 | 2.3295485475E+00 | 9.6500040532E+01 | -8.1776008410E+02 |
| 30 | 21 | 2.3295485475E+00 | 9.7000040532E+01 | -8.1776007897E+02 |
| 30 | 22 | 2.3295485475E+00 | 9.7500040532E+01 | -8.1776007316E+02 |
| 30 | 23 | 2.3295485475E+00 | 9.8000040532E+01 | -8.1776006025E+02 |
| 30 | 24 | 2.3295485475E+00 | 9.8500040532E+01 | -8.1776004652E+02 |
| 30 | 25 | 2.3295485475E+00 | 9.9000040532E+01 | -8.1776000200E+02 |
| 30 | 26 | 2.3295485475E+00 | 9.9500040532E+01 | -8.1776002084E+02 |
| 30 | 27 | 2.3295485475E+00 | 1.0000004053E+02 | -8.1775997439E+02 |
| 30 | 28 | 2.3295485475E+00 | 1.0050004053E+02 | -8.1775998544E+02 |
| 30 | 29 | 2.3295485475E+00 | 1.0100004053E+02 | -8.1775998872E+02 |
| 30 | 30 | 2.3295485475E+00 | 1.0150004053E+02 | -8.1775998479E+02 |
| 30 | 31 | 2.3295485475E+00 | 1.0200004053E+02 | -8.1775998178E+02 |
| 30 | 32 | 2.3295485475E+00 | 1.0250004053E+02 | -8.1775997758E+02 |
| 30 | 33 | 2.3295485475E+00 | 1.0300004053E+02 | -8.1775997103E+02 |
| 30 | 34 | 2.3295485475E+00 | 1.0350004053E+02 | -8.1775995388E+02 |
| 30 | 35 | 2.3295485475E+00 | 1.0400004053E+02 | -8.1775994991E+02 |
| 30 | 36 | 2.3295485475E+00 | 1.0450004053E+02 | -8.1775992653E+02 |
| 30 | 37 | 2.3295485475E+00 | 1.0500004053E+02 | -8.1775990574E+02 |
| 30 | 38 | 2.3295485475E+00 | 1.0550004053E+02 | -8.1775989585E+02 |
| 30 | 39 | 2.3295485475E+00 | 1.0600004053E+02 | -8.1775987230E+02 |
| 30 | 40 | 2.3295485475E+00 | 1.0650004053E+02 | -8.1775984686E+02 |
| 30 | 41 | 2.3295485475E+00 | 1.0700004053E+02 | -8.1775936432E+02 |
| 30 | 42 | 2.3295485475E+00 | 1.0750004053E+02 | -8.1775979002E+02 |
| 30 | 43 | 2.3295485475E+00 | 1.0800004053E+02 | -8.1775976036E+02 |
| 30 | 44 | 2.3295485475E+00 | 1.0850004053E+02 | -8.1775973011E+02 |
| 30 | 45 | 2.3295485475E+00 | 1.0900004053E+02 | -8.1775969971E+02 |
| 30 | 46 | 2.3295485475E+00 | 1.0950004053E+02 | -8.1775966716E+02 |
| 30 | 47 | 2.3295485475E+00 | 1.1000004053E+02 | -8.1775963305E+02 |
| 30 | 48 | 2.3295485475E+00 | 1.1050004053E+02 | -8.1775975501E+02 |
| 30 | 49 | 2.3295485475E+00 | 1.1100004053E+02 | -8.1775972479E+02 |
| 30 | 50 | 2.3295485475E+00 | 1.1150004053E+02 | -8.1775969309E+02 |
| 30 | 51 | 2.3295485475E+00 | 1.1200004053E+02 | -8.1775966042E+02 |
| 30 | 52 | 2.3295485475E+00 | 1.1250004053E+02 | -8.1775962667E+02 |
| 30 | 53 | 2.3295485475E+00 | 1.1300004053E+02 | -8.1775959272E+02 |
| 30 | 54 | 2.3295485475E+00 | 1.1350004053E+02 | -8.1775955916E+02 |
| 30 | 55 | 2.3295485475E+00 | 1.1400004053E+02 | -8.1775952984E+02 |
| 30 | 56 | 2.3295485475E+00 | 1.1450004053E+02 | -8.1775950169E+02 |
| 30 | 57 | 2.3295485475E+00 | 1.1500004053E+02 | -8.1775947356E+02 |

|    |    |                  |                  |                   |
|----|----|------------------|------------------|-------------------|
| 30 | 58 | 2.3295485475E+00 | 1.1550004053E+02 | -8.1775944377E+02 |
| 30 | 59 | 2.3295485475E+00 | 1.1600004053E+02 | -8.1775941271E+02 |
| 30 | 60 | 2.3295485475E+00 | 1.1650004053E+02 | -8.1775938033E+02 |
| 30 | 61 | 2.3295485475E+00 | 1.1700004053E+02 | -8.1775934639E+02 |
| 31 | 1  | 2.3395485475E+00 | 8.7000040532E+01 | -8.1775988311E+02 |
| 31 | 2  | 2.3395485475E+00 | 8.7500040532E+01 | -8.1775990541E+02 |
| 31 | 3  | 2.3395485475E+00 | 8.8000040532E+01 | -8.1775992376E+02 |
| 31 | 4  | 2.3395485475E+00 | 8.8500040532E+01 | -8.1775992273E+02 |
| 31 | 5  | 2.3395485475E+00 | 8.9000040532E+01 | -8.1775994842E+02 |
| 31 | 6  | 2.3395485475E+00 | 8.9500040532E+01 | -8.1775995146E+02 |
| 31 | 7  | 2.3395485475E+00 | 9.0000040532E+01 | -8.1775995888E+02 |
| 31 | 8  | 2.3395485475E+00 | 9.0500040532E+01 | -8.1775995907E+02 |
| 31 | 9  | 2.3395485475E+00 | 9.1000040532E+01 | -8.1775995681E+02 |
| 31 | 10 | 2.3395485475E+00 | 9.1500040532E+01 | -8.1775993518E+02 |
| 31 | 11 | 2.3395485475E+00 | 9.2000040532E+01 | -8.1775994418E+02 |
| 31 | 12 | 2.3395485475E+00 | 9.2500040532E+01 | -8.1775992960E+02 |
| 31 | 13 | 2.3395485475E+00 | 9.3000040532E+01 | -8.1775989011E+02 |
| 31 | 14 | 2.3395485475E+00 | 9.3500040532E+01 | -8.1775990901E+02 |
| 31 | 15 | 2.3395485475E+00 | 9.4000040532E+01 | -8.1775989377E+02 |
| 31 | 16 | 2.3395485475E+00 | 9.4500040532E+01 | -8.1775988083E+02 |
| 31 | 17 | 2.3395485475E+00 | 9.5000040532E+01 | -8.1775987543E+02 |
| 31 | 18 | 2.3395485475E+00 | 9.5500040532E+01 | -8.1775986194E+02 |
| 31 | 19 | 2.3395485475E+00 | 9.6000040532E+01 | -8.1775984624E+02 |
| 31 | 20 | 2.3395485475E+00 | 9.6500040532E+01 | -8.1775984319E+02 |
| 31 | 21 | 2.3395485475E+00 | 9.7000040532E+01 | -8.1775980404E+02 |
| 31 | 22 | 2.3395485475E+00 | 9.7500040532E+01 | -8.1775982531E+02 |
| 31 | 23 | 2.3395485475E+00 | 9.8000040532E+01 | -8.1775980318E+02 |
| 31 | 24 | 2.3395485475E+00 | 9.8500040532E+01 | -8.1775980696E+02 |
| 31 | 25 | 2.3395485475E+00 | 9.9000040532E+01 | -8.1775979838E+02 |
| 31 | 26 | 2.3395485475E+00 | 9.9500040532E+01 | -8.1775977889E+02 |
| 31 | 27 | 2.3395485475E+00 | 1.0000004053E+02 | -8.1775978843E+02 |
| 31 | 28 | 2.3395485475E+00 | 1.0050004053E+02 | -8.1775978976E+02 |
| 31 | 29 | 2.3395485475E+00 | 1.0100004053E+02 | -8.1775979286E+02 |
| 31 | 30 | 2.3395485475E+00 | 1.0150004053E+02 | -8.1775978825E+02 |
| 31 | 31 | 2.3395485475E+00 | 1.0200004053E+02 | -8.1775978225E+02 |
| 31 | 32 | 2.3395485475E+00 | 1.0250004053E+02 | -8.1775978666E+02 |
| 31 | 33 | 2.3395485475E+00 | 1.0300004053E+02 | -8.1775977904E+02 |
| 31 | 34 | 2.3395485475E+00 | 1.0350004053E+02 | -8.1775978352E+02 |
| 31 | 35 | 2.3395485475E+00 | 1.0400004053E+02 | -8.1775976255E+02 |
| 31 | 36 | 2.3395485475E+00 | 1.0450004053E+02 | -8.1775975991E+02 |
| 31 | 37 | 2.3395485475E+00 | 1.0500004053E+02 | -8.1775974344E+02 |
| 31 | 38 | 2.3395485475E+00 | 1.0550004053E+02 | -8.1775972359E+02 |
| 31 | 39 | 2.3395485475E+00 | 1.0600004053E+02 | -8.1775970136E+02 |
| 31 | 40 | 2.3395485475E+00 | 1.0650004053E+02 | -8.1775967608E+02 |
| 31 | 41 | 2.3395485475E+00 | 1.0700004053E+02 | -8.1775910716E+02 |
| 31 | 42 | 2.3395485475E+00 | 1.0750004053E+02 | -8.1775962030E+02 |
| 31 | 43 | 2.3395485475E+00 | 1.0800004053E+02 | -8.1775959099E+02 |
| 31 | 44 | 2.3395485475E+00 | 1.0850004053E+02 | -8.1775956150E+02 |
| 31 | 45 | 2.3395485475E+00 | 1.0900004053E+02 | -8.1775953197E+02 |
| 31 | 46 | 2.3395485475E+00 | 1.0950004053E+02 | -8.1775950043E+02 |
| 31 | 47 | 2.3395485475E+00 | 1.1000004053E+02 | -8.1775946657E+02 |
| 31 | 48 | 2.3395485475E+00 | 1.1050004053E+02 | -8.1775957618E+02 |



|    |    |                  |                  |                   |
|----|----|------------------|------------------|-------------------|
| 31 | 49 | 2.3395485475E+00 | 1.1100004053E+02 | -8.1775954511E+02 |
| 31 | 50 | 2.3395485475E+00 | 1.1150004053E+02 | -8.1775951355E+02 |
| 31 | 51 | 2.3395485475E+00 | 1.1200004053E+02 | -8.1775948118E+02 |
| 31 | 52 | 2.3395485475E+00 | 1.1250004053E+02 | -8.1775944703E+02 |
| 31 | 53 | 2.3395485475E+00 | 1.1300004053E+02 | -8.1775941319E+02 |
| 31 | 54 | 2.3395485475E+00 | 1.1350004053E+02 | -8.1775937997E+02 |
| 31 | 55 | 2.3395485475E+00 | 1.1400004053E+02 | -8.1775935215E+02 |
| 31 | 56 | 2.3395485475E+00 | 1.1450004053E+02 | -8.1775932511E+02 |
| 31 | 57 | 2.3395485475E+00 | 1.1500004053E+02 | -8.1775929617E+02 |
| 31 | 58 | 2.3395485475E+00 | 1.1550004053E+02 | -8.1775926609E+02 |
| 31 | 59 | 2.3395485475E+00 | 1.1600004053E+02 | -8.1775923497E+02 |
| 31 | 60 | 2.3395485475E+00 | 1.1650004053E+02 | -8.1775920202E+02 |
| 31 | 61 | 2.3395485475E+00 | 1.1700004053E+02 | -8.1775916780E+02 |
| 32 | 1  | 2.3495485475E+00 | 8.7000040532E+01 | -8.1775956830E+02 |
| 32 | 2  | 2.3495485475E+00 | 8.7500040532E+01 | -8.1775957912E+02 |
| 32 | 3  | 2.3495485475E+00 | 8.8000040532E+01 | -8.1775961078E+02 |
| 32 | 4  | 2.3495485475E+00 | 8.8500040532E+01 | -8.1775962566E+02 |
| 32 | 5  | 2.3495485475E+00 | 8.9000040532E+01 | -8.1775963765E+02 |
| 32 | 6  | 2.3495485475E+00 | 8.9500040532E+01 | -8.1775964940E+02 |
| 32 | 7  | 2.3495485475E+00 | 9.0000040532E+01 | -8.1775965056E+02 |
| 32 | 8  | 2.3495485475E+00 | 9.0500040532E+01 | -8.1775963920E+02 |
| 32 | 9  | 2.3495485475E+00 | 9.1000040532E+01 | -8.1775965134E+02 |
| 32 | 10 | 2.3495485475E+00 | 9.1500040532E+01 | -8.1775964683E+02 |
| 32 | 11 | 2.3495485475E+00 | 9.2000040532E+01 | -8.1775964176E+02 |
| 32 | 12 | 2.3495485475E+00 | 9.2500040532E+01 | -8.1775963714E+02 |
| 32 | 13 | 2.3495485475E+00 | 9.3000040532E+01 | -8.1775962705E+02 |
| 32 | 14 | 2.3495485475E+00 | 9.3500040532E+01 | -8.1775959495E+02 |
| 32 | 15 | 2.3495485475E+00 | 9.4000040532E+01 | -8.1775959916E+02 |
| 32 | 16 | 2.3495485475E+00 | 9.4500040532E+01 | -8.1775960832E+02 |
| 32 | 17 | 2.3495485475E+00 | 9.5000040532E+01 | -8.1775960261E+02 |
| 32 | 18 | 2.3495485475E+00 | 9.5500040532E+01 | -8.1775959635E+02 |
| 32 | 19 | 2.3495485475E+00 | 9.6000040532E+01 | -8.1775955920E+02 |
| 32 | 20 | 2.3495485475E+00 | 9.6500040532E+01 | -8.1775958571E+02 |
| 32 | 21 | 2.3495485475E+00 | 9.7000040532E+01 | -8.1775958096E+02 |
| 32 | 22 | 2.3495485475E+00 | 9.7500040532E+01 | -8.1775957630E+02 |
| 32 | 23 | 2.3495485475E+00 | 9.8000040532E+01 | -8.1775952919E+02 |
| 32 | 24 | 2.3495485475E+00 | 9.8500040532E+01 | -8.1775955607E+02 |
| 32 | 25 | 2.3495485475E+00 | 9.9000040532E+01 | -8.1775954946E+02 |
| 32 | 26 | 2.3495485475E+00 | 9.9500040532E+01 | -8.1775957455E+02 |
| 32 | 27 | 2.3495485475E+00 | 1.0000004053E+02 | -8.1775958450E+02 |
| 32 | 28 | 2.3495485475E+00 | 1.0050004053E+02 | -8.1775958638E+02 |
| 32 | 29 | 2.3495485475E+00 | 1.0100004053E+02 | -8.1775960273E+02 |
| 32 | 30 | 2.3495485475E+00 | 1.0150004053E+02 | -8.1775960868E+02 |
| 32 | 31 | 2.3495485475E+00 | 1.0200004053E+02 | -8.1775961339E+02 |
| 32 | 32 | 2.3495485475E+00 | 1.0250004053E+02 | -8.1775961442E+02 |
| 32 | 33 | 2.3495485475E+00 | 1.0300004053E+02 | -8.1775961302E+02 |
| 32 | 34 | 2.3495485475E+00 | 1.0350004053E+02 | -8.1775959847E+02 |
| 32 | 35 | 2.3495485475E+00 | 1.0400004053E+02 | -8.1775959983E+02 |
| 32 | 36 | 2.3495485475E+00 | 1.0450004053E+02 | -8.1775958776E+02 |
| 32 | 37 | 2.3495485475E+00 | 1.0500004053E+02 | -8.1775957270E+02 |
| 32 | 38 | 2.3495485475E+00 | 1.0550004053E+02 | -8.1775955411E+02 |
| 32 | 39 | 2.3495485475E+00 | 1.0600004053E+02 | -8.1775953269E+02 |

|    |    |                  |                  |                   |
|----|----|------------------|------------------|-------------------|
| 32 | 40 | 2.3495485475E+00 | 1.0650004053E+02 | -8.1775950840E+02 |
| 32 | 41 | 2.3495485475E+00 | 1.0700004053E+02 | -8.1775948173E+02 |
| 32 | 42 | 2.3495485475E+00 | 1.0750004053E+02 | -8.1775945319E+02 |
| 32 | 43 | 2.3495485475E+00 | 1.0800004053E+02 | -8.1775942413E+02 |
| 32 | 44 | 2.3495485475E+00 | 1.0850004053E+02 | -8.1775939561E+02 |
| 32 | 45 | 2.3495485475E+00 | 1.0900004053E+02 | -8.1775936749E+02 |
| 32 | 46 | 2.3495485475E+00 | 1.0950004053E+02 | -8.1775933935E+02 |
| 32 | 47 | 2.3495485475E+00 | 1.1000004053E+02 | -8.1775930831E+02 |
| 32 | 48 | 2.3495485475E+00 | 1.1050004053E+02 | -8.1775927868E+02 |
| 32 | 49 | 2.3495485475E+00 | 1.1100004053E+02 | -8.1775936644E+02 |
| 32 | 50 | 2.3495485475E+00 | 1.1150004053E+02 | -8.1775933324E+02 |
| 32 | 51 | 2.3495485475E+00 | 1.1200004053E+02 | -8.1775930178E+02 |
| 32 | 52 | 2.3495485475E+00 | 1.1250004053E+02 | -8.1775926598E+02 |
| 32 | 53 | 2.3495485475E+00 | 1.1300004053E+02 | -8.1775923430E+02 |
| 32 | 54 | 2.3495485475E+00 | 1.1350004053E+02 | -8.1775920196E+02 |
| 32 | 55 | 2.3495485475E+00 | 1.1400004053E+02 | -8.1775917439E+02 |
| 32 | 56 | 2.3495485475E+00 | 1.1450004053E+02 | -8.1775914711E+02 |
| 32 | 57 | 2.3495485475E+00 | 1.1500004053E+02 | -8.1775911840E+02 |
| 32 | 58 | 2.3495485475E+00 | 1.1550004053E+02 | -8.1775908828E+02 |
| 32 | 59 | 2.3495485475E+00 | 1.1600004053E+02 | -8.1775905634E+02 |
| 32 | 60 | 2.3495485475E+00 | 1.1650004053E+02 | -8.1775902308E+02 |
| 32 | 61 | 2.3495485475E+00 | 1.1700004053E+02 | -8.1775898834E+02 |
| 33 | 1  | 2.3595485475E+00 | 8.7000040532E+01 | -8.1775924828E+02 |
| 33 | 2  | 2.3595485475E+00 | 8.7500040532E+01 | -8.1775926849E+02 |
| 33 | 3  | 2.3595485475E+00 | 8.8000040532E+01 | -8.1775927973E+02 |
| 33 | 4  | 2.3595485475E+00 | 8.8500040532E+01 | -8.1775930976E+02 |
| 33 | 5  | 2.3595485475E+00 | 8.9000040532E+01 | -8.1775930882E+02 |
| 33 | 6  | 2.3595485475E+00 | 8.9500040532E+01 | -8.1775931558E+02 |
| 33 | 7  | 2.3595485475E+00 | 9.0000040532E+01 | -8.1775932443E+02 |
| 33 | 8  | 2.3595485475E+00 | 9.0500040532E+01 | -8.1775933830E+02 |
| 33 | 9  | 2.3595485475E+00 | 9.1000040532E+01 | -8.1775932852E+02 |
| 33 | 10 | 2.3595485475E+00 | 9.1500040532E+01 | -8.1775934138E+02 |
| 33 | 11 | 2.3595485475E+00 | 9.2000040532E+01 | -8.1775932240E+02 |
| 33 | 12 | 2.3595485475E+00 | 9.2500040532E+01 | -8.1775930056E+02 |
| 33 | 13 | 2.3595485475E+00 | 9.3000040532E+01 | -8.1775931984E+02 |
| 33 | 14 | 2.3595485475E+00 | 9.3500040532E+01 | -8.1775932394E+02 |
| 33 | 15 | 2.3595485475E+00 | 9.4000040532E+01 | -8.1775928802E+02 |
| 33 | 16 | 2.3595485475E+00 | 9.4500040532E+01 | -8.1775930655E+02 |
| 33 | 17 | 2.3595485475E+00 | 9.5000040532E+01 | -8.1775932716E+02 |
| 33 | 18 | 2.3595485475E+00 | 9.5500040532E+01 | -8.1775932674E+02 |
| 33 | 19 | 2.3595485475E+00 | 9.6000040532E+01 | -8.1775932706E+02 |
| 33 | 20 | 2.3595485475E+00 | 9.6500040532E+01 | -8.1775929670E+02 |
| 33 | 21 | 2.3595485475E+00 | 9.7000040532E+01 | -8.1775931236E+02 |
| 33 | 22 | 2.3595485475E+00 | 9.7500040532E+01 | -8.1775932071E+02 |
| 33 | 23 | 2.3595485475E+00 | 9.8000040532E+01 | -8.1775933316E+02 |
| 33 | 24 | 2.3595485475E+00 | 9.8500040532E+01 | -8.1775934052E+02 |
| 33 | 25 | 2.3595485475E+00 | 9.9000040532E+01 | -8.1775928501E+02 |
| 33 | 26 | 2.3595485475E+00 | 9.9500040532E+01 | -8.1775936356E+02 |
| 33 | 27 | 2.3595485475E+00 | 1.0000004053E+02 | -8.1775938904E+02 |
| 33 | 28 | 2.3595485475E+00 | 1.0050004053E+02 | -8.1775940352E+02 |
| 33 | 29 | 2.3595485475E+00 | 1.0100004053E+02 | -8.1775940422E+02 |
| 33 | 30 | 2.3595485475E+00 | 1.0150004053E+02 | -8.1775941621E+02 |

|    |    |                  |                  |                   |
|----|----|------------------|------------------|-------------------|
| 33 | 31 | 2.3595485475E+00 | 1.0200004053E+02 | -8.1775942323E+02 |
| 33 | 32 | 2.3595485475E+00 | 1.0250004053E+02 | -8.1775942746E+02 |
| 33 | 33 | 2.3595485475E+00 | 1.0300004053E+02 | -8.1775942945E+02 |
| 33 | 34 | 2.3595485475E+00 | 1.0350004053E+02 | -8.1775943676E+02 |
| 33 | 35 | 2.3595485475E+00 | 1.0400004053E+02 | -8.1775942066E+02 |
| 33 | 36 | 2.3595485475E+00 | 1.0450004053E+02 | -8.1775942002E+02 |
| 33 | 37 | 2.3595485475E+00 | 1.0500004053E+02 | -8.1775940633E+02 |
| 33 | 38 | 2.3595485475E+00 | 1.0550004053E+02 | -8.1775938883E+02 |
| 33 | 39 | 2.3595485475E+00 | 1.0600004053E+02 | -8.1775936850E+02 |
| 33 | 40 | 2.3595485475E+00 | 1.0650004053E+02 | -8.1775934500E+02 |
| 33 | 41 | 2.3595485475E+00 | 1.0700004053E+02 | -8.1775931905E+02 |
| 33 | 42 | 2.3595485475E+00 | 1.0750004053E+02 | -8.1775929086E+02 |
| 33 | 43 | 2.3595485475E+00 | 1.0800004053E+02 | -8.1775926169E+02 |
| 33 | 44 | 2.3595485475E+00 | 1.0850004053E+02 | -8.1775923393E+02 |
| 33 | 45 | 2.3595485475E+00 | 1.0900004053E+02 | -8.1775920949E+02 |
| 33 | 46 | 2.3595485475E+00 | 1.0950004053E+02 | -8.1775918271E+02 |
| 33 | 47 | 2.3595485475E+00 | 1.1000004053E+02 | -8.1775915221E+02 |
| 33 | 48 | 2.3595485475E+00 | 1.1050004053E+02 | -8.1775911992E+02 |
| 33 | 49 | 2.3595485475E+00 | 1.1100004053E+02 | -8.1775919987E+02 |
| 33 | 50 | 2.3595485475E+00 | 1.1150004053E+02 | -8.1775916536E+02 |
| 33 | 51 | 2.3595485475E+00 | 1.1200004053E+02 | -8.1775912716E+02 |
| 33 | 52 | 2.3595485475E+00 | 1.1250004053E+02 | -8.1775909533E+02 |
| 33 | 53 | 2.3595485475E+00 | 1.1300004053E+02 | -8.1775906050E+02 |
| 33 | 54 | 2.3595485475E+00 | 1.1350004053E+02 | -8.1775876396E+02 |
| 33 | 55 | 2.3595485475E+00 | 1.1400004053E+02 | -8.1775899377E+02 |
| 33 | 56 | 2.3595485475E+00 | 1.1450004053E+02 | -8.1775896946E+02 |
| 33 | 57 | 2.3595485475E+00 | 1.1500004053E+02 | -8.1775894032E+02 |
| 33 | 58 | 2.3595485475E+00 | 1.1550004053E+02 | -8.1775891011E+02 |
| 33 | 59 | 2.3595485475E+00 | 1.1600004053E+02 | -8.1775887782E+02 |
| 33 | 60 | 2.3595485475E+00 | 1.1650004053E+02 | -8.1775884398E+02 |
| 33 | 61 | 2.3595485475E+00 | 1.1700004053E+02 | -8.1775880870E+02 |
| 34 | 1  | 2.3695485475E+00 | 8.7000040532E+01 | -8.1775891401E+02 |
| 34 | 2  | 2.3695485475E+00 | 8.7500040532E+01 | -8.1775893973E+02 |
| 34 | 3  | 2.3695485475E+00 | 8.8000040532E+01 | -8.1775896201E+02 |
| 34 | 4  | 2.3695485475E+00 | 8.8500040532E+01 | -8.1775896337E+02 |
| 34 | 5  | 2.3695485475E+00 | 8.9000040532E+01 | -8.1775899524E+02 |
| 34 | 6  | 2.3695485475E+00 | 8.9500040532E+01 | -8.1775900243E+02 |
| 34 | 7  | 2.3695485475E+00 | 9.0000040532E+01 | -8.1775901528E+02 |
| 34 | 8  | 2.3695485475E+00 | 9.0500040532E+01 | -8.1775902076E+02 |
| 34 | 9  | 2.3695485475E+00 | 9.1000040532E+01 | -8.1775902348E+02 |
| 34 | 10 | 2.3695485475E+00 | 9.1500040532E+01 | -8.1775898053E+02 |
| 34 | 11 | 2.3695485475E+00 | 9.2000040532E+01 | -8.1775902188E+02 |
| 34 | 12 | 2.3695485475E+00 | 9.2500040532E+01 | -8.1775901875E+02 |
| 34 | 13 | 2.3695485475E+00 | 9.3000040532E+01 | -8.1775899687E+02 |
| 34 | 14 | 2.3695485475E+00 | 9.3500040532E+01 | -8.1775903813E+02 |
| 34 | 15 | 2.3695485475E+00 | 9.4000040532E+01 | -8.1775896130E+02 |
| 34 | 16 | 2.3695485475E+00 | 9.4500040532E+01 | -8.1775904546E+02 |
| 34 | 17 | 2.3695485475E+00 | 9.5000040532E+01 | -8.1775904051E+02 |
| 34 | 18 | 2.3695485475E+00 | 9.5500040532E+01 | -8.1775902969E+02 |
| 34 | 19 | 2.3695485475E+00 | 9.6000040532E+01 | -8.1775905026E+02 |
| 34 | 20 | 2.3695485475E+00 | 9.6500040532E+01 | -8.1775906694E+02 |
| 34 | 21 | 2.3695485475E+00 | 9.7000040532E+01 | -8.1775902906E+02 |

|    |    |                  |                  |                   |
|----|----|------------------|------------------|-------------------|
| 34 | 22 | 2.3695485475E+00 | 9.7500040532E+01 | -8.1775909032E+02 |
| 34 | 23 | 2.3695485475E+00 | 9.8000040532E+01 | -8.1775910655E+02 |
| 34 | 24 | 2.3695485475E+00 | 9.8500040532E+01 | -8.1775912049E+02 |
| 34 | 25 | 2.3695485475E+00 | 9.9000040532E+01 | -8.1775915467E+02 |
| 34 | 26 | 2.3695485475E+00 | 9.9500040532E+01 | -8.1775917820E+02 |
| 34 | 27 | 2.3695485475E+00 | 1.0000004053E+02 | -8.1775918783E+02 |
| 34 | 28 | 2.3695485475E+00 | 1.0050004053E+02 | -8.1775920704E+02 |
| 34 | 29 | 2.3695485475E+00 | 1.0100004053E+02 | -8.1775923559E+02 |
| 34 | 30 | 2.3695485475E+00 | 1.0150004053E+02 | -8.1775924933E+02 |
| 34 | 31 | 2.3695485475E+00 | 1.0200004053E+02 | -8.1775926014E+02 |
| 34 | 32 | 2.3695485475E+00 | 1.0250004053E+02 | -8.1775926759E+02 |
| 34 | 33 | 2.3695485475E+00 | 1.0300004053E+02 | -8.1775927104E+02 |
| 34 | 34 | 2.3695485475E+00 | 1.0350004053E+02 | -8.1775927080E+02 |
| 34 | 35 | 2.3695485475E+00 | 1.0400004053E+02 | -8.1775926663E+02 |
| 34 | 36 | 2.3695485475E+00 | 1.0450004053E+02 | -8.1775925826E+02 |
| 34 | 37 | 2.3695485475E+00 | 1.0500004053E+02 | -8.1775924627E+02 |
| 34 | 38 | 2.3695485475E+00 | 1.0550004053E+02 | -8.1775923025E+02 |
| 34 | 39 | 2.3695485475E+00 | 1.0600004053E+02 | -8.1775921128E+02 |
| 34 | 40 | 2.3695485475E+00 | 1.0650004053E+02 | -8.1775918900E+02 |
| 34 | 41 | 2.3695485475E+00 | 1.0700004053E+02 | -8.1775916379E+02 |
| 34 | 42 | 2.3695485475E+00 | 1.0750004053E+02 | -8.1775913601E+02 |
| 34 | 43 | 2.3695485475E+00 | 1.0800004053E+02 | -8.1775910666E+02 |
| 34 | 44 | 2.3695485475E+00 | 1.0850004053E+02 | -8.1775907946E+02 |
| 34 | 45 | 2.3695485475E+00 | 1.0900004053E+02 | -8.1775905668E+02 |
| 34 | 46 | 2.3695485475E+00 | 1.0950004053E+02 | -8.1775903007E+02 |
| 34 | 47 | 2.3695485475E+00 | 1.1000004053E+02 | -8.1775899960E+02 |
| 34 | 48 | 2.3695485475E+00 | 1.1050004053E+02 | -8.1775896594E+02 |
| 34 | 49 | 2.3695485475E+00 | 1.1100004053E+02 | -8.1775903705E+02 |
| 34 | 50 | 2.3695485475E+00 | 1.1150004053E+02 | -8.1775900134E+02 |
| 34 | 51 | 2.3695485475E+00 | 1.1200004053E+02 | -8.1775896478E+02 |
| 34 | 52 | 2.3695485475E+00 | 1.1250004053E+02 | -8.1775892856E+02 |
| 34 | 53 | 2.3695485475E+00 | 1.1300004053E+02 | -8.1775889209E+02 |
| 34 | 54 | 2.3695485475E+00 | 1.1350004053E+02 | -8.1775885661E+02 |
| 34 | 55 | 2.3695485475E+00 | 1.1400004053E+02 | -8.1775882312E+02 |
| 34 | 56 | 2.3695485475E+00 | 1.1450004053E+02 | -8.1775879504E+02 |
| 34 | 57 | 2.3695485475E+00 | 1.1500004053E+02 | -8.1775876492E+02 |
| 34 | 58 | 2.3695485475E+00 | 1.1550004053E+02 | -8.1775873320E+02 |
| 34 | 59 | 2.3695485475E+00 | 1.1600004053E+02 | -8.1775870083E+02 |
| 34 | 60 | 2.3695485475E+00 | 1.1650004053E+02 | -8.1775866648E+02 |
| 34 | 61 | 2.3695485475E+00 | 1.1700004053E+02 | -8.1775863052E+02 |
| 35 | 1  | 2.3795485475E+00 | 8.7000040532E+01 | -8.1775857073E+02 |
| 35 | 2  | 2.3795485475E+00 | 8.7500040532E+01 | -8.1775858050E+02 |
| 35 | 3  | 2.3795485475E+00 | 8.8000040532E+01 | -8.1775861847E+02 |
| 35 | 4  | 2.3795485475E+00 | 8.8500040532E+01 | -8.1775863791E+02 |
| 35 | 5  | 2.3795485475E+00 | 8.9000040532E+01 | -8.1775865550E+02 |
| 35 | 6  | 2.3795485475E+00 | 8.9500040532E+01 | -8.1775867335E+02 |
| 35 | 7  | 2.3795485475E+00 | 9.0000040532E+01 | -8.1775868014E+02 |
| 35 | 8  | 2.3795485475E+00 | 9.0500040532E+01 | -8.1775860039E+02 |
| 35 | 9  | 2.3795485475E+00 | 9.1000040532E+01 | -8.1775869357E+02 |
| 35 | 10 | 2.3795485475E+00 | 9.1500040532E+01 | -8.1775868823E+02 |
| 35 | 11 | 2.3795485475E+00 | 9.2000040532E+01 | -8.1775869811E+02 |
| 35 | 12 | 2.3795485475E+00 | 9.2500040532E+01 | -8.1775872339E+02 |



|    |    |                  |                  |                   |
|----|----|------------------|------------------|-------------------|
| 35 | 13 | 2.3795485475E+00 | 9.3000040532E+01 | -8.1775865965E+02 |
| 35 | 14 | 2.3795485475E+00 | 9.3500040532E+01 | -8.1775874793E+02 |
| 35 | 15 | 2.3795485475E+00 | 9.4000040532E+01 | -8.1775875942E+02 |
| 35 | 16 | 2.3795485475E+00 | 9.4500040532E+01 | -8.1775877162E+02 |
| 35 | 17 | 2.3795485475E+00 | 9.5000040532E+01 | -8.1775874043E+02 |
| 35 | 18 | 2.3795485475E+00 | 9.5500040532E+01 | -8.1775879166E+02 |
| 35 | 19 | 2.3795485475E+00 | 9.6000040532E+01 | -8.1775876076E+02 |
| 35 | 20 | 2.3795485475E+00 | 9.6500040532E+01 | -8.1775882517E+02 |
| 35 | 21 | 2.3795485475E+00 | 9.7000040532E+01 | -8.1775884262E+02 |
| 35 | 22 | 2.3795485475E+00 | 9.7500040532E+01 | -8.1775885969E+02 |
| 35 | 23 | 2.3795485475E+00 | 9.8000040532E+01 | -8.1775888185E+02 |
| 35 | 24 | 2.3795485475E+00 | 9.8500040532E+01 | -8.1775893292E+02 |
| 35 | 25 | 2.3795485475E+00 | 9.9000040532E+01 | -8.1775895093E+02 |
| 35 | 26 | 2.3795485475E+00 | 9.9500040532E+01 | -8.1775897809E+02 |
| 35 | 27 | 2.3795485475E+00 | 1.0000004053E+02 | -8.1775901817E+02 |
| 35 | 28 | 2.3795485475E+00 | 1.0050004053E+02 | -8.1775904144E+02 |
| 35 | 29 | 2.3795485475E+00 | 1.0100004053E+02 | -8.1775906205E+02 |
| 35 | 30 | 2.3795485475E+00 | 1.0150004053E+02 | -8.1775906123E+02 |
| 35 | 31 | 2.3795485475E+00 | 1.0200004053E+02 | -8.1775908556E+02 |
| 35 | 32 | 2.3795485475E+00 | 1.0250004053E+02 | -8.1775910371E+02 |
| 35 | 33 | 2.3795485475E+00 | 1.0300004053E+02 | -8.1775911067E+02 |
| 35 | 34 | 2.3795485475E+00 | 1.0350004053E+02 | -8.1775911356E+02 |
| 35 | 35 | 2.3795485475E+00 | 1.0400004053E+02 | -8.1775911167E+02 |
| 35 | 36 | 2.3795485475E+00 | 1.0450004053E+02 | -8.1775910569E+02 |
| 35 | 37 | 2.3795485475E+00 | 1.0500004053E+02 | -8.1775909602E+02 |
| 35 | 38 | 2.3795485475E+00 | 1.0550004053E+02 | -8.1775908238E+02 |
| 35 | 39 | 2.3795485475E+00 | 1.0600004053E+02 | -8.1775906546E+02 |
| 35 | 40 | 2.3795485475E+00 | 1.0650004053E+02 | -8.1775904488E+02 |
| 35 | 41 | 2.3795485475E+00 | 1.0700004053E+02 | -8.1775902109E+02 |
| 35 | 42 | 2.3795485475E+00 | 1.0750004053E+02 | -8.1775899413E+02 |
| 35 | 43 | 2.3795485475E+00 | 1.0800004053E+02 | -8.1775896482E+02 |
| 35 | 44 | 2.3795485475E+00 | 1.0850004053E+02 | -8.1775893535E+02 |
| 35 | 45 | 2.3795485475E+00 | 1.0900004053E+02 | -8.1775891190E+02 |
| 35 | 46 | 2.3795485475E+00 | 1.0950004053E+02 | -8.1775888580E+02 |
| 35 | 47 | 2.3795485475E+00 | 1.1000004053E+02 | -8.1775885618E+02 |
| 35 | 48 | 2.3795485475E+00 | 1.1050004053E+02 | -8.1775882273E+02 |
| 35 | 49 | 2.3795485475E+00 | 1.1100004053E+02 | -8.1775888417E+02 |
| 35 | 50 | 2.3795485475E+00 | 1.1150004053E+02 | -8.1775884583E+02 |
| 35 | 51 | 2.3795485475E+00 | 1.1200004053E+02 | -8.1775880705E+02 |
| 35 | 52 | 2.3795485475E+00 | 1.1250004053E+02 | -8.1775876877E+02 |
| 35 | 53 | 2.3795485475E+00 | 1.1300004053E+02 | -8.1775873043E+02 |
| 35 | 54 | 2.3795485475E+00 | 1.1350004053E+02 | -8.1775869296E+02 |
| 35 | 55 | 2.3795485475E+00 | 1.1400004053E+02 | -8.1775857059E+02 |
| 35 | 56 | 2.3795485475E+00 | 1.1450004053E+02 | -8.1775862513E+02 |
| 35 | 57 | 2.3795485475E+00 | 1.1500004053E+02 | -8.1775859344E+02 |
| 35 | 58 | 2.3795485475E+00 | 1.1550004053E+02 | -8.1775856133E+02 |
| 35 | 59 | 2.3795485475E+00 | 1.1600004053E+02 | -8.1775852798E+02 |
| 35 | 60 | 2.3795485475E+00 | 1.1650004053E+02 | -8.1775849277E+02 |
| 35 | 61 | 2.3795485475E+00 | 1.1700004053E+02 | -8.1775845618E+02 |
| 36 | 1  | 2.3895485475E+00 | 8.7000040532E+01 | -8.1775821991E+02 |
| 36 | 2  | 2.3895485475E+00 | 8.7500040532E+01 | -8.1775824470E+02 |
| 36 | 3  | 2.3895485475E+00 | 8.8000040532E+01 | -8.1775826006E+02 |

|    |    |                  |                  |                   |
|----|----|------------------|------------------|-------------------|
| 36 | 4  | 2.3895485475E+00 | 8.8500040532E+01 | -8.1775829796E+02 |
| 36 | 5  | 2.3895485475E+00 | 8.9000040532E+01 | -8.1775830180E+02 |
| 36 | 6  | 2.3895485475E+00 | 8.9500040532E+01 | -8.1775823742E+02 |
| 36 | 7  | 2.3895485475E+00 | 9.0000040532E+01 | -8.1775833059E+02 |
| 36 | 8  | 2.3895485475E+00 | 9.0500040532E+01 | -8.1775831156E+02 |
| 36 | 9  | 2.3895485475E+00 | 9.1000040532E+01 | -8.1775834921E+02 |
| 36 | 10 | 2.3895485475E+00 | 9.1500040532E+01 | -8.1775838297E+02 |
| 36 | 11 | 2.3895485475E+00 | 9.2000040532E+01 | -8.1775836028E+02 |
| 36 | 12 | 2.3895485475E+00 | 9.2500040532E+01 | -8.1775839426E+02 |
| 36 | 13 | 2.3895485475E+00 | 9.3000040532E+01 | -8.1775844334E+02 |
| 36 | 14 | 2.3895485475E+00 | 9.3500040532E+01 | -8.1775842724E+02 |
| 36 | 15 | 2.3895485475E+00 | 9.4000040532E+01 | -8.1775846774E+02 |
| 36 | 16 | 2.3895485475E+00 | 9.4500040532E+01 | -8.1775845215E+02 |
| 36 | 17 | 2.3895485475E+00 | 9.5000040532E+01 | -8.1775842846E+02 |
| 36 | 18 | 2.3895485475E+00 | 9.5500040532E+01 | -8.1775854203E+02 |
| 36 | 19 | 2.3895485475E+00 | 9.6000040532E+01 | -8.1775845975E+02 |
| 36 | 20 | 2.3895485475E+00 | 9.6500040532E+01 | -8.1775858334E+02 |
| 36 | 21 | 2.3895485475E+00 | 9.7000040532E+01 | -8.1775863049E+02 |
| 36 | 22 | 2.3895485475E+00 | 9.7500040532E+01 | -8.1775867104E+02 |
| 36 | 23 | 2.3895485475E+00 | 9.8000040532E+01 | -8.1775871047E+02 |
| 36 | 24 | 2.3895485475E+00 | 9.8500040532E+01 | -8.1775874794E+02 |
| 36 | 25 | 2.3895485475E+00 | 9.9000040532E+01 | -8.1775878334E+02 |
| 36 | 26 | 2.3895485475E+00 | 9.9500040532E+01 | -8.1775881620E+02 |
| 36 | 27 | 2.3895485475E+00 | 1.0000004053E+02 | -8.1775883794E+02 |
| 36 | 28 | 2.3895485475E+00 | 1.0050004053E+02 | -8.1775884623E+02 |
| 36 | 29 | 2.3895485475E+00 | 1.0100004053E+02 | -8.1775889092E+02 |
| 36 | 30 | 2.3895485475E+00 | 1.0150004053E+02 | -8.1775891819E+02 |
| 36 | 31 | 2.3895485475E+00 | 1.0200004053E+02 | -8.1775893586E+02 |
| 36 | 32 | 2.3895485475E+00 | 1.0250004053E+02 | -8.1775895031E+02 |
| 36 | 33 | 2.3895485475E+00 | 1.0300004053E+02 | -8.1775896084E+02 |
| 36 | 34 | 2.3895485475E+00 | 1.0350004053E+02 | -8.1775896865E+02 |
| 36 | 35 | 2.3895485475E+00 | 1.0400004053E+02 | -8.1775896958E+02 |
| 36 | 36 | 2.3895485475E+00 | 1.0450004053E+02 | -8.1775896761E+02 |
| 36 | 37 | 2.3895485475E+00 | 1.0500004053E+02 | -8.1775896172E+02 |
| 36 | 38 | 2.3895485475E+00 | 1.0550004053E+02 | -8.1775895170E+02 |
| 36 | 39 | 2.3895485475E+00 | 1.0600004053E+02 | -8.1775893775E+02 |
| 36 | 40 | 2.3895485475E+00 | 1.0650004053E+02 | -8.1775892034E+02 |
| 36 | 41 | 2.3895485475E+00 | 1.0700004053E+02 | -8.1775889920E+02 |
| 36 | 42 | 2.3895485475E+00 | 1.0750004053E+02 | -8.1775887489E+02 |
| 36 | 43 | 2.3895485475E+00 | 1.0800004053E+02 | -8.1775884749E+02 |
| 36 | 44 | 2.3895485475E+00 | 1.0850004053E+02 | -8.1775881774E+02 |
| 36 | 45 | 2.3895485475E+00 | 1.0900004053E+02 | -8.1775878758E+02 |
| 36 | 46 | 2.3895485475E+00 | 1.0950004053E+02 | -8.1775876062E+02 |
| 36 | 47 | 2.3895485475E+00 | 1.1000004053E+02 | -8.1775873385E+02 |
| 36 | 48 | 2.3895485475E+00 | 1.1050004053E+02 | -8.1775870340E+02 |
| 36 | 49 | 2.3895485475E+00 | 1.1100004053E+02 | -8.1775875804E+02 |
| 36 | 50 | 2.3895485475E+00 | 1.1150004053E+02 | -8.1775871778E+02 |
| 36 | 51 | 2.3895485475E+00 | 1.1200004053E+02 | -8.1775867751E+02 |
| 36 | 52 | 2.3895485475E+00 | 1.1250004053E+02 | -8.1775863619E+02 |
| 36 | 53 | 2.3895485475E+00 | 1.1300004053E+02 | -8.1775859431E+02 |
| 36 | 54 | 2.3895485475E+00 | 1.1350004053E+02 | -8.1775855212E+02 |
| 36 | 55 | 2.3895485475E+00 | 1.1400004053E+02 | -8.1775851020E+02 |

|    |    |                  |                  |                   |
|----|----|------------------|------------------|-------------------|
| 36 | 56 | 2.3895485475E+00 | 1.1450004053E+02 | -8.1775846986E+02 |
| 36 | 57 | 2.3895485475E+00 | 1.1500004053E+02 | -8.1775843415E+02 |
| 36 | 58 | 2.3895485475E+00 | 1.1550004053E+02 | -8.1775839494E+02 |
| 36 | 59 | 2.3895485475E+00 | 1.1600004053E+02 | -8.1775836111E+02 |
| 36 | 60 | 2.3895485475E+00 | 1.1650004053E+02 | -8.1775800322E+02 |
| 36 | 61 | 2.3895485475E+00 | 1.1700004053E+02 | -8.1775829241E+02 |
| 37 | 1  | 2.3995485475E+00 | 8.7000040532E+01 | -8.1775786310E+02 |
| 37 | 2  | 2.3995485475E+00 | 8.7500040532E+01 | -8.1775789489E+02 |
| 37 | 3  | 2.3995485475E+00 | 8.8000040532E+01 | -8.1775792371E+02 |
| 37 | 4  | 2.3995485475E+00 | 8.8500040532E+01 | -8.1775792807E+02 |
| 37 | 5  | 2.3995485475E+00 | 8.9000040532E+01 | -8.1775797156E+02 |
| 37 | 6  | 2.3995485475E+00 | 8.9500040532E+01 | -8.1775793447E+02 |
| 37 | 7  | 2.3995485475E+00 | 9.0000040532E+01 | -8.1775800781E+02 |
| 37 | 8  | 2.3995485475E+00 | 9.0500040532E+01 | -8.1775801116E+02 |
| 37 | 9  | 2.3995485475E+00 | 9.1000040532E+01 | -8.1775804645E+02 |
| 37 | 10 | 2.3995485475E+00 | 9.1500040532E+01 | -8.1775799503E+02 |
| 37 | 11 | 2.3995485475E+00 | 9.2000040532E+01 | -8.1775801085E+02 |
| 37 | 12 | 2.3995485475E+00 | 9.2500040532E+01 | -8.1775812259E+02 |
| 37 | 13 | 2.3995485475E+00 | 9.3000040532E+01 | -8.1775814468E+02 |
| 37 | 14 | 2.3995485475E+00 | 9.3500040532E+01 | -8.1775817430E+02 |
| 37 | 15 | 2.3995485475E+00 | 9.4000040532E+01 | -8.1775816504E+02 |
| 37 | 16 | 2.3995485475E+00 | 9.4500040532E+01 | -8.1775822573E+02 |
| 37 | 17 | 2.3995485475E+00 | 9.5000040532E+01 | -8.1775826751E+02 |
| 37 | 18 | 2.3995485475E+00 | 9.5500040532E+01 | -8.1775829047E+02 |
| 37 | 19 | 2.3995485475E+00 | 9.6000040532E+01 | -8.1775834366E+02 |
| 37 | 20 | 2.3995485475E+00 | 9.6500040532E+01 | -8.1775839348E+02 |
| 37 | 21 | 2.3995485475E+00 | 9.7000040532E+01 | -8.1775844283E+02 |
| 37 | 22 | 2.3995485475E+00 | 9.7500040532E+01 | -8.1775847690E+02 |
| 37 | 23 | 2.3995485475E+00 | 9.8000040532E+01 | -8.1775852087E+02 |
| 37 | 24 | 2.3995485475E+00 | 9.8500040532E+01 | -8.1775855757E+02 |
| 37 | 25 | 2.3995485475E+00 | 9.9000040532E+01 | -8.1775860689E+02 |
| 37 | 26 | 2.3995485475E+00 | 9.9500040532E+01 | -8.1775865318E+02 |
| 37 | 27 | 2.3995485475E+00 | 1.0000004053E+02 | -8.1775868604E+02 |
| 37 | 28 | 2.3995485475E+00 | 1.0050004053E+02 | -8.1775871651E+02 |
| 37 | 29 | 2.3995485475E+00 | 1.0100004053E+02 | -8.1775874350E+02 |
| 37 | 30 | 2.3995485475E+00 | 1.0150004053E+02 | -8.1775876808E+02 |
| 37 | 31 | 2.3995485475E+00 | 1.0200004053E+02 | -8.1775879013E+02 |
| 37 | 32 | 2.3995485475E+00 | 1.0250004053E+02 | -8.1775880944E+02 |
| 37 | 33 | 2.3995485475E+00 | 1.0300004053E+02 | -8.1775882681E+02 |
| 37 | 34 | 2.3995485475E+00 | 1.0350004053E+02 | -8.1775883913E+02 |
| 37 | 35 | 2.3995485475E+00 | 1.0400004053E+02 | -8.1775884775E+02 |
| 37 | 36 | 2.3995485475E+00 | 1.0450004053E+02 | -8.1775885148E+02 |
| 37 | 37 | 2.3995485475E+00 | 1.0500004053E+02 | -8.1775885109E+02 |
| 37 | 38 | 2.3995485475E+00 | 1.0550004053E+02 | -8.1775884613E+02 |
| 37 | 39 | 2.3995485475E+00 | 1.0600004053E+02 | -8.1775883738E+02 |
| 37 | 40 | 2.3995485475E+00 | 1.0650004053E+02 | -8.1775882446E+02 |
| 37 | 41 | 2.3995485475E+00 | 1.0700004053E+02 | -8.1775880824E+02 |
| 37 | 42 | 2.3995485475E+00 | 1.0750004053E+02 | -8.1775878843E+02 |
| 37 | 43 | 2.3995485475E+00 | 1.0800004053E+02 | -8.1775876557E+02 |
| 37 | 44 | 2.3995485475E+00 | 1.0850004053E+02 | -8.1775873983E+02 |
| 37 | 45 | 2.3995485475E+00 | 1.0900004053E+02 | -8.1775871162E+02 |
| 37 | 46 | 2.3995485475E+00 | 1.0950004053E+02 | -8.1775868195E+02 |

|    |    |                  |                  |                   |
|----|----|------------------|------------------|-------------------|
| 37 | 47 | 2.3995485475E+00 | 1.1000004053E+02 | -8.1775865335E+02 |
| 37 | 48 | 2.3995485475E+00 | 1.1050004053E+02 | -8.1775862629E+02 |
| 37 | 49 | 2.3995485475E+00 | 1.1100004053E+02 | -8.1775868836E+02 |
| 37 | 50 | 2.3995485475E+00 | 1.1150004053E+02 | -8.1775864970E+02 |
| 37 | 51 | 2.3995485475E+00 | 1.1200004053E+02 | -8.1775861029E+02 |
| 37 | 52 | 2.3995485475E+00 | 1.1250004053E+02 | -8.1775857123E+02 |
| 37 | 53 | 2.3995485475E+00 | 1.1300004053E+02 | -8.1775853205E+02 |
| 37 | 54 | 2.3995485475E+00 | 1.1350004053E+02 | -8.1775849188E+02 |
| 37 | 55 | 2.3995485475E+00 | 1.1400004053E+02 | -8.1775845077E+02 |
| 37 | 56 | 2.3995485475E+00 | 1.1450004053E+02 | -8.1775840875E+02 |
| 37 | 57 | 2.3995485475E+00 | 1.1500004053E+02 | -8.1775836616E+02 |
| 37 | 58 | 2.3995485475E+00 | 1.1550004053E+02 | -8.1775832349E+02 |
| 37 | 59 | 2.3995485475E+00 | 1.1600004053E+02 | -8.1775828072E+02 |
| 37 | 60 | 2.3995485475E+00 | 1.1650004053E+02 | -8.1775823799E+02 |
| 37 | 61 | 2.3995485475E+00 | 1.1700004053E+02 | -8.1775819386E+02 |
| 38 | 1  | 2.4095485475E+00 | 8.7000040532E+01 | -8.1775750221E+02 |
| 38 | 2  | 2.4095485475E+00 | 8.7500040532E+01 | -8.1775751621E+02 |
| 38 | 3  | 2.4095485475E+00 | 8.8000040532E+01 | -8.1775756434E+02 |
| 38 | 4  | 2.4095485475E+00 | 8.8500040532E+01 | -8.1775759121E+02 |
| 38 | 5  | 2.4095485475E+00 | 8.9000040532E+01 | -8.1775762296E+02 |
| 38 | 6  | 2.4095485475E+00 | 8.9500040532E+01 | -8.1775762118E+02 |
| 38 | 7  | 2.4095485475E+00 | 9.0000040532E+01 | -8.1775766656E+02 |
| 38 | 8  | 2.4095485475E+00 | 9.0500040532E+01 | -8.1775769957E+02 |
| 38 | 9  | 2.4095485475E+00 | 9.1000040532E+01 | -8.1775773664E+02 |
| 38 | 10 | 2.4095485475E+00 | 9.1500040532E+01 | -8.1775773465E+02 |
| 38 | 11 | 2.4095485475E+00 | 9.2000040532E+01 | -8.1775780700E+02 |
| 38 | 12 | 2.4095485475E+00 | 9.2500040532E+01 | -8.1775784115E+02 |
| 38 | 13 | 2.4095485475E+00 | 9.3000040532E+01 | -8.1775783627E+02 |
| 38 | 14 | 2.4095485475E+00 | 9.3500040532E+01 | -8.1775791144E+02 |
| 38 | 15 | 2.4095485475E+00 | 9.4000040532E+01 | -8.1775785323E+02 |
| 38 | 16 | 2.4095485475E+00 | 9.4500040532E+01 | -8.1775798995E+02 |
| 38 | 17 | 2.4095485475E+00 | 9.5000040532E+01 | -8.1775801419E+02 |
| 38 | 18 | 2.4095485475E+00 | 9.5500040532E+01 | -8.1775809901E+02 |
| 38 | 19 | 2.4095485475E+00 | 9.6000040532E+01 | -8.1775815897E+02 |
| 38 | 20 | 2.4095485475E+00 | 9.6500040532E+01 | -8.1775820511E+02 |
| 38 | 21 | 2.4095485475E+00 | 9.7000040532E+01 | -8.1775825606E+02 |
| 38 | 22 | 2.4095485475E+00 | 9.7500040532E+01 | -8.1775832976E+02 |
| 38 | 23 | 2.4095485475E+00 | 9.8000040532E+01 | -8.1775838154E+02 |
| 38 | 24 | 2.4095485475E+00 | 9.8500040532E+01 | -8.1775842987E+02 |
| 38 | 25 | 2.4095485475E+00 | 9.9000040532E+01 | -8.1775847547E+02 |
| 38 | 26 | 2.4095485475E+00 | 9.9500040532E+01 | -8.1775851901E+02 |
| 38 | 27 | 2.4095485475E+00 | 1.0000004053E+02 | -8.1775856012E+02 |
| 38 | 28 | 2.4095485475E+00 | 1.0050004053E+02 | -8.1775859789E+02 |
| 38 | 29 | 2.4095485475E+00 | 1.0100004053E+02 | -8.1775863125E+02 |
| 38 | 30 | 2.4095485475E+00 | 1.0150004053E+02 | -8.1775865996E+02 |
| 38 | 31 | 2.4095485475E+00 | 1.0200004053E+02 | -8.1775868375E+02 |
| 38 | 32 | 2.4095485475E+00 | 1.0250004053E+02 | -8.1775870332E+02 |
| 38 | 33 | 2.4095485475E+00 | 1.0300004053E+02 | -8.1775871916E+02 |
| 38 | 34 | 2.4095485475E+00 | 1.0350004053E+02 | -8.1775873249E+02 |
| 38 | 35 | 2.4095485475E+00 | 1.0400004053E+02 | -8.1775874903E+02 |
| 38 | 36 | 2.4095485475E+00 | 1.0450004053E+02 | -8.1775876188E+02 |
| 38 | 37 | 2.4095485475E+00 | 1.0500004053E+02 | -8.1775876954E+02 |



|    |    |                  |                  |                   |
|----|----|------------------|------------------|-------------------|
| 38 | 38 | 2.4095485475E+00 | 1.0550004053E+02 | -8.1775877195E+02 |
| 38 | 39 | 2.4095485475E+00 | 1.0600004053E+02 | -8.1775876879E+02 |
| 38 | 40 | 2.4095485475E+00 | 1.0650004053E+02 | -8.1775876221E+02 |
| 38 | 41 | 2.4095485475E+00 | 1.0700004053E+02 | -8.1775875033E+02 |
| 38 | 42 | 2.4095485475E+00 | 1.0750004053E+02 | -8.1775873554E+02 |
| 38 | 43 | 2.4095485475E+00 | 1.0800004053E+02 | -8.1775871756E+02 |
| 38 | 44 | 2.4095485475E+00 | 1.0850004053E+02 | -8.1775869627E+02 |
| 38 | 45 | 2.4095485475E+00 | 1.0900004053E+02 | -8.1775867245E+02 |
| 38 | 46 | 2.4095485475E+00 | 1.0950004053E+02 | -8.1775864610E+02 |
| 38 | 47 | 2.4095485475E+00 | 1.1000004053E+02 | -8.1775861834E+02 |
| 38 | 48 | 2.4095485475E+00 | 1.1050004053E+02 | -8.1775859115E+02 |
| 38 | 49 | 2.4095485475E+00 | 1.1100004053E+02 | -8.1775865687E+02 |
| 38 | 50 | 2.4095485475E+00 | 1.1150004053E+02 | -8.1775862184E+02 |
| 38 | 51 | 2.4095485475E+00 | 1.1200004053E+02 | -8.1775858611E+02 |
| 38 | 52 | 2.4095485475E+00 | 1.1250004053E+02 | -8.1775854993E+02 |
| 38 | 53 | 2.4095485475E+00 | 1.1300004053E+02 | -8.1775851407E+02 |
| 38 | 54 | 2.4095485475E+00 | 1.1350004053E+02 | -8.1775847765E+02 |
| 38 | 55 | 2.4095485475E+00 | 1.1400004053E+02 | -8.1775844023E+02 |
| 38 | 56 | 2.4095485475E+00 | 1.1450004053E+02 | -8.1775840160E+02 |
| 38 | 57 | 2.4095485475E+00 | 1.1500004053E+02 | -8.1775836191E+02 |
| 38 | 58 | 2.4095485475E+00 | 1.1550004053E+02 | -8.1775832144E+02 |
| 38 | 59 | 2.4095485475E+00 | 1.1600004053E+02 | -8.1775828078E+02 |
| 38 | 60 | 2.4095485475E+00 | 1.1650004053E+02 | -8.1775824012E+02 |
| 38 | 61 | 2.4095485475E+00 | 1.1700004053E+02 | -8.1775819986E+02 |
| 39 | 1  | 2.4195485475E+00 | 8.7000040532E+01 | -8.1775713454E+02 |
| 39 | 2  | 2.4195485475E+00 | 8.7500040532E+01 | -8.1775717110E+02 |
| 39 | 3  | 2.4195485475E+00 | 8.8000040532E+01 | -8.1775719364E+02 |
| 39 | 4  | 2.4195485475E+00 | 8.8500040532E+01 | -8.1775724427E+02 |
| 39 | 5  | 2.4195485475E+00 | 8.9000040532E+01 | -8.1775726968E+02 |
| 39 | 6  | 2.4195485475E+00 | 8.9500040532E+01 | -8.1775729736E+02 |
| 39 | 7  | 2.4195485475E+00 | 9.0000040532E+01 | -8.1775734305E+02 |
| 39 | 8  | 2.4195485475E+00 | 9.0500040532E+01 | -8.1775728487E+02 |
| 39 | 9  | 2.4195485475E+00 | 9.1000040532E+01 | -8.1775743297E+02 |
| 39 | 10 | 2.4195485475E+00 | 9.1500040532E+01 | -8.1775746659E+02 |
| 39 | 11 | 2.4195485475E+00 | 9.2000040532E+01 | -8.1775750917E+02 |
| 39 | 12 | 2.4195485475E+00 | 9.2500040532E+01 | -8.1775747025E+02 |
| 39 | 13 | 2.4195485475E+00 | 9.3000040532E+01 | -8.1775751956E+02 |
| 39 | 14 | 2.4195485475E+00 | 9.3500040532E+01 | -8.1775765668E+02 |
| 39 | 15 | 2.4195485475E+00 | 9.4000040532E+01 | -8.1775771571E+02 |
| 39 | 16 | 2.4195485475E+00 | 9.4500040532E+01 | -8.1775777445E+02 |
| 39 | 17 | 2.4195485475E+00 | 9.5000040532E+01 | -8.1775775342E+02 |
| 39 | 18 | 2.4195485475E+00 | 9.5500040532E+01 | -8.1775791219E+02 |
| 39 | 19 | 2.4195485475E+00 | 9.6000040532E+01 | -8.1775797545E+02 |
| 39 | 20 | 2.4195485475E+00 | 9.6500040532E+01 | -8.1775806734E+02 |
| 39 | 21 | 2.4195485475E+00 | 9.7000040532E+01 | -8.1775813442E+02 |
| 39 | 22 | 2.4195485475E+00 | 9.7500040532E+01 | -8.1775820033E+02 |
| 39 | 23 | 2.4195485475E+00 | 9.8000040532E+01 | -8.1775824007E+02 |
| 39 | 24 | 2.4195485475E+00 | 9.8500040532E+01 | -8.1775832742E+02 |
| 39 | 25 | 2.4195485475E+00 | 9.9000040532E+01 | -8.1775835700E+02 |
| 39 | 26 | 2.4195485475E+00 | 9.9500040532E+01 | -8.1775844179E+02 |
| 39 | 27 | 2.4195485475E+00 | 1.0000004053E+02 | -8.1775849170E+02 |
| 39 | 28 | 2.4195485475E+00 | 1.0050004053E+02 | -8.1775853653E+02 |

|    |    |                  |                  |                   |
|----|----|------------------|------------------|-------------------|
| 39 | 29 | 2.4195485475E+00 | 1.0100004053E+02 | -8.1775857592E+02 |
| 39 | 30 | 2.4195485475E+00 | 1.0150004053E+02 | -8.1775861006E+02 |
| 39 | 31 | 2.4195485475E+00 | 1.0200004053E+02 | -8.1775863852E+02 |
| 39 | 32 | 2.4195485475E+00 | 1.0250004053E+02 | -8.1775866250E+02 |
| 39 | 33 | 2.4195485475E+00 | 1.0300004053E+02 | -8.1775868066E+02 |
| 39 | 34 | 2.4195485475E+00 | 1.0350004053E+02 | -8.1775869396E+02 |
| 39 | 35 | 2.4195485475E+00 | 1.0400004053E+02 | -8.1775870232E+02 |
| 39 | 36 | 2.4195485475E+00 | 1.0450004053E+02 | -8.1775870729E+02 |
| 39 | 37 | 2.4195485475E+00 | 1.0500004053E+02 | -8.1775871270E+02 |
| 39 | 38 | 2.4195485475E+00 | 1.0550004053E+02 | -8.1775872471E+02 |
| 39 | 39 | 2.4195485475E+00 | 1.0600004053E+02 | -8.1775873009E+02 |
| 39 | 40 | 2.4195485475E+00 | 1.0650004053E+02 | -8.1775872837E+02 |
| 39 | 41 | 2.4195485475E+00 | 1.0700004053E+02 | -8.1775872229E+02 |
| 39 | 42 | 2.4195485475E+00 | 1.0750004053E+02 | -8.1775871190E+02 |
| 39 | 43 | 2.4195485475E+00 | 1.0800004053E+02 | -8.1775869811E+02 |
| 39 | 44 | 2.4195485475E+00 | 1.0850004053E+02 | -8.1775868093E+02 |
| 39 | 45 | 2.4195485475E+00 | 1.0900004053E+02 | -8.1775866093E+02 |
| 39 | 46 | 2.4195485475E+00 | 1.0950004053E+02 | -8.1775863826E+02 |
| 39 | 47 | 2.4195485475E+00 | 1.1000004053E+02 | -8.1775861355E+02 |
| 39 | 48 | 2.4195485475E+00 | 1.1050004053E+02 | -8.1775858777E+02 |
| 39 | 49 | 2.4195485475E+00 | 1.1100004053E+02 | -8.1775865433E+02 |
| 39 | 50 | 2.4195485475E+00 | 1.1150004053E+02 | -8.1775862176E+02 |
| 39 | 51 | 2.4195485475E+00 | 1.1200004053E+02 | -8.1775858913E+02 |
| 39 | 52 | 2.4195485475E+00 | 1.1250004053E+02 | -8.1775855633E+02 |
| 39 | 53 | 2.4195485475E+00 | 1.1300004053E+02 | -8.1775852395E+02 |
| 39 | 54 | 2.4195485475E+00 | 1.1350004053E+02 | -8.1775849127E+02 |
| 39 | 55 | 2.4195485475E+00 | 1.1400004053E+02 | -8.1775845755E+02 |
| 39 | 56 | 2.4195485475E+00 | 1.1450004053E+02 | -8.1775842254E+02 |
| 39 | 57 | 2.4195485475E+00 | 1.1500004053E+02 | -8.1775838636E+02 |
| 39 | 58 | 2.4195485475E+00 | 1.1550004053E+02 | -8.1775834905E+02 |
| 39 | 59 | 2.4195485475E+00 | 1.1600004053E+02 | -8.1775831116E+02 |
| 39 | 60 | 2.4195485475E+00 | 1.1650004053E+02 | -8.1775827298E+02 |
| 39 | 61 | 2.4195485475E+00 | 1.1700004053E+02 | -8.1775823519E+02 |
| 40 | 1  | 2.4295485475E+00 | 8.7000040532E+01 | -8.1775677522E+02 |
| 40 | 2  | 2.4295485475E+00 | 8.7500040532E+01 | -8.1775681690E+02 |
| 40 | 3  | 2.4295485475E+00 | 8.8000040532E+01 | -8.1775685588E+02 |
| 40 | 4  | 2.4295485475E+00 | 8.8500040532E+01 | -8.1775677907E+02 |
| 40 | 5  | 2.4295485475E+00 | 8.9000040532E+01 | -8.1775690738E+02 |
| 40 | 6  | 2.4295485475E+00 | 8.9500040532E+01 | -8.1775686793E+02 |
| 40 | 7  | 2.4295485475E+00 | 9.0000040532E+01 | -8.1775702213E+02 |
| 40 | 8  | 2.4295485475E+00 | 9.0500040532E+01 | -8.1775703420E+02 |
| 40 | 9  | 2.4295485475E+00 | 9.1000040532E+01 | -8.1775712873E+02 |
| 40 | 10 | 2.4295485475E+00 | 9.1500040532E+01 | -8.1775719059E+02 |
| 40 | 11 | 2.4295485475E+00 | 9.2000040532E+01 | -8.1775720317E+02 |
| 40 | 12 | 2.4295485475E+00 | 9.2500040532E+01 | -8.1775728011E+02 |
| 40 | 13 | 2.4295485475E+00 | 9.3000040532E+01 | -8.1775736636E+02 |
| 40 | 14 | 2.4295485475E+00 | 9.3500040532E+01 | -8.1775743361E+02 |
| 40 | 15 | 2.4295485475E+00 | 9.4000040532E+01 | -8.1775753100E+02 |
| 40 | 16 | 2.4295485475E+00 | 9.4500040532E+01 | -8.1775761557E+02 |
| 40 | 17 | 2.4295485475E+00 | 9.5000040532E+01 | -8.1775770089E+02 |
| 40 | 18 | 2.4295485475E+00 | 9.5500040532E+01 | -8.1775778535E+02 |
| 40 | 19 | 2.4295485475E+00 | 9.6000040532E+01 | -8.1775786937E+02 |

|    |    |                  |                  |                   |
|----|----|------------------|------------------|-------------------|
| 40 | 20 | 2.4295485475E+00 | 9.6500040532E+01 | -8.1775795302E+02 |
| 40 | 21 | 2.4295485475E+00 | 9.7000040532E+01 | -8.1775800842E+02 |
| 40 | 22 | 2.4295485475E+00 | 9.7500040532E+01 | -8.1775811874E+02 |
| 40 | 23 | 2.4295485475E+00 | 9.8000040532E+01 | -8.1775819615E+02 |
| 40 | 24 | 2.4295485475E+00 | 9.8500040532E+01 | -8.1775826934E+02 |
| 40 | 25 | 2.4295485475E+00 | 9.9000040532E+01 | -8.1775833685E+02 |
| 40 | 26 | 2.4295485475E+00 | 9.9500040532E+01 | -8.1775839900E+02 |
| 40 | 27 | 2.4295485475E+00 | 1.0000004053E+02 | -8.1775845504E+02 |
| 40 | 28 | 2.4295485475E+00 | 1.0050004053E+02 | -8.1775850562E+02 |
| 40 | 29 | 2.4295485475E+00 | 1.0100004053E+02 | -8.1775855033E+02 |
| 40 | 30 | 2.4295485475E+00 | 1.0150004053E+02 | -8.1775858939E+02 |
| 40 | 31 | 2.4295485475E+00 | 1.0200004053E+02 | -8.1775862231E+02 |
| 40 | 32 | 2.4295485475E+00 | 1.0250004053E+02 | -8.1775864977E+02 |
| 40 | 33 | 2.4295485475E+00 | 1.0300004053E+02 | -8.1775867156E+02 |
| 40 | 34 | 2.4295485475E+00 | 1.0350004053E+02 | -8.1775868801E+02 |
| 40 | 35 | 2.4295485475E+00 | 1.0400004053E+02 | -8.1775869932E+02 |
| 40 | 36 | 2.4295485475E+00 | 1.0450004053E+02 | -8.1775870566E+02 |
| 40 | 37 | 2.4295485475E+00 | 1.0500004053E+02 | -8.1775870793E+02 |
| 40 | 38 | 2.4295485475E+00 | 1.0550004053E+02 | -8.1775870662E+02 |
| 40 | 39 | 2.4295485475E+00 | 1.0600004053E+02 | -8.1775871743E+02 |
| 40 | 40 | 2.4295485475E+00 | 1.0650004053E+02 | -8.1775872289E+02 |
| 40 | 41 | 2.4295485475E+00 | 1.0700004053E+02 | -8.1775872071E+02 |
| 40 | 42 | 2.4295485475E+00 | 1.0750004053E+02 | -8.1775871428E+02 |
| 40 | 43 | 2.4295485475E+00 | 1.0800004053E+02 | -8.1775870372E+02 |
| 40 | 44 | 2.4295485475E+00 | 1.0850004053E+02 | -8.1775869004E+02 |
| 40 | 45 | 2.4295485475E+00 | 1.0900004053E+02 | -8.1775867318E+02 |
| 40 | 46 | 2.4295485475E+00 | 1.0950004053E+02 | -8.1775865362E+02 |
| 40 | 47 | 2.4295485475E+00 | 1.1000004053E+02 | -8.1775863185E+02 |
| 40 | 48 | 2.4295485475E+00 | 1.1050004053E+02 | -8.1775860855E+02 |
| 40 | 49 | 2.4295485475E+00 | 1.1100004053E+02 | -8.1775867497E+02 |
| 40 | 50 | 2.4295485475E+00 | 1.1150004053E+02 | -8.1775864469E+02 |
| 40 | 51 | 2.4295485475E+00 | 1.1200004053E+02 | -8.1775861483E+02 |
| 40 | 52 | 2.4295485475E+00 | 1.1250004053E+02 | -8.1775858522E+02 |
| 40 | 53 | 2.4295485475E+00 | 1.1300004053E+02 | -8.1775855632E+02 |
| 40 | 54 | 2.4295485475E+00 | 1.1350004053E+02 | -8.1775852715E+02 |
| 40 | 55 | 2.4295485475E+00 | 1.1400004053E+02 | -8.1775849705E+02 |
| 40 | 56 | 2.4295485475E+00 | 1.1450004053E+02 | -8.1775846559E+02 |
| 40 | 57 | 2.4295485475E+00 | 1.1500004053E+02 | -8.1775843280E+02 |
| 40 | 58 | 2.4295485475E+00 | 1.1550004053E+02 | -8.1775839880E+02 |
| 40 | 59 | 2.4295485475E+00 | 1.1600004053E+02 | -8.1775836398E+02 |
| 40 | 60 | 2.4295485475E+00 | 1.1650004053E+02 | -8.1775832869E+02 |
| 40 | 61 | 2.4295485475E+00 | 1.1700004053E+02 | -8.1775829367E+02 |
| 41 | 1  | 2.4395485475E+00 | 8.7000040532E+01 | -8.1775640813E+02 |
| 41 | 2  | 2.4395485475E+00 | 8.7500040532E+01 | -8.1775632022E+02 |
| 41 | 3  | 2.4395485475E+00 | 8.8000040532E+01 | -8.1775650232E+02 |
| 41 | 4  | 2.4395485475E+00 | 8.8500040532E+01 | -8.1775649776E+02 |
| 41 | 5  | 2.4395485475E+00 | 8.9000040532E+01 | -8.1775660323E+02 |
| 41 | 6  | 2.4395485475E+00 | 8.9500040532E+01 | -8.1775661250E+02 |
| 41 | 7  | 2.4395485475E+00 | 9.0000040532E+01 | -8.1775669350E+02 |
| 41 | 8  | 2.4395485475E+00 | 9.0500040532E+01 | -8.1775677803E+02 |
| 41 | 9  | 2.4395485475E+00 | 9.1000040532E+01 | -8.1775681765E+02 |
| 41 | 10 | 2.4395485475E+00 | 9.1500040532E+01 | -8.1775692045E+02 |

|    |    |                  |                  |                   |
|----|----|------------------|------------------|-------------------|
| 41 | 11 | 2.4395485475E+00 | 9.2000040532E+01 | -8.1775689161E+02 |
| 41 | 12 | 2.4395485475E+00 | 9.2500040532E+01 | -8.1775708521E+02 |
| 41 | 13 | 2.4395485475E+00 | 9.3000040532E+01 | -8.1775718283E+02 |
| 41 | 14 | 2.4395485475E+00 | 9.3500040532E+01 | -8.1775728172E+02 |
| 41 | 15 | 2.4395485475E+00 | 9.4000040532E+01 | -8.1775735346E+02 |
| 41 | 16 | 2.4395485475E+00 | 9.4500040532E+01 | -8.1775745519E+02 |
| 41 | 17 | 2.4395485475E+00 | 9.5000040532E+01 | -8.1775755791E+02 |
| 41 | 18 | 2.4395485475E+00 | 9.5500040532E+01 | -8.1775768852E+02 |
| 41 | 19 | 2.4395485475E+00 | 9.6000040532E+01 | -8.1775776080E+02 |
| 41 | 20 | 2.4395485475E+00 | 9.6500040532E+01 | -8.1775789268E+02 |
| 41 | 21 | 2.4395485475E+00 | 9.7000040532E+01 | -8.1775798958E+02 |
| 41 | 22 | 2.4395485475E+00 | 9.7500040532E+01 | -8.1775808054E+02 |
| 41 | 23 | 2.4395485475E+00 | 9.8000040532E+01 | -8.1775816605E+02 |
| 41 | 24 | 2.4395485475E+00 | 9.8500040532E+01 | -8.1775824585E+02 |
| 41 | 25 | 2.4395485475E+00 | 9.9000040532E+01 | -8.1775831940E+02 |
| 41 | 26 | 2.4395485475E+00 | 9.9500040532E+01 | -8.1775838677E+02 |
| 41 | 27 | 2.4395485475E+00 | 1.0000004053E+02 | -8.1775844762E+02 |
| 41 | 28 | 2.4395485475E+00 | 1.0050004053E+02 | -8.1775850286E+02 |
| 41 | 29 | 2.4395485475E+00 | 1.0100004053E+02 | -8.1775855127E+02 |
| 41 | 30 | 2.4395485475E+00 | 1.0150004053E+02 | -8.1775859399E+02 |
| 41 | 31 | 2.4395485475E+00 | 1.0200004053E+02 | -8.1775863045E+02 |
| 41 | 32 | 2.4395485475E+00 | 1.0250004053E+02 | -8.1775866105E+02 |
| 41 | 33 | 2.4395485475E+00 | 1.0300004053E+02 | -8.1775868558E+02 |
| 41 | 34 | 2.4395485475E+00 | 1.0350004053E+02 | -8.1775870471E+02 |
| 41 | 35 | 2.4395485475E+00 | 1.0400004053E+02 | -8.1775871819E+02 |
| 41 | 36 | 2.4395485475E+00 | 1.0450004053E+02 | -8.1775872664E+02 |
| 41 | 37 | 2.4395485475E+00 | 1.0500004053E+02 | -8.1775873006E+02 |
| 41 | 38 | 2.4395485475E+00 | 1.0550004053E+02 | -8.1775872947E+02 |
| 41 | 39 | 2.4395485475E+00 | 1.0600004053E+02 | -8.1775872691E+02 |
| 41 | 40 | 2.4395485475E+00 | 1.0650004053E+02 | -8.1775874169E+02 |
| 41 | 41 | 2.4395485475E+00 | 1.0700004053E+02 | -8.1775874329E+02 |
| 41 | 42 | 2.4395485475E+00 | 1.0750004053E+02 | -8.1775873998E+02 |
| 41 | 43 | 2.4395485475E+00 | 1.0800004053E+02 | -8.1775873225E+02 |
| 41 | 44 | 2.4395485475E+00 | 1.0850004053E+02 | -8.1775872115E+02 |
| 41 | 45 | 2.4395485475E+00 | 1.0900004053E+02 | -8.1775870679E+02 |
| 41 | 46 | 2.4395485475E+00 | 1.0950004053E+02 | -8.1775868980E+02 |
| 41 | 47 | 2.4395485475E+00 | 1.1000004053E+02 | -8.1775867059E+02 |
| 41 | 48 | 2.4395485475E+00 | 1.1050004053E+02 | -8.1775864972E+02 |
| 41 | 49 | 2.4395485475E+00 | 1.1100004053E+02 | -8.1775871552E+02 |
| 41 | 50 | 2.4395485475E+00 | 1.1150004053E+02 | -8.1775868771E+02 |
| 41 | 51 | 2.4395485475E+00 | 1.1200004053E+02 | -8.1775866048E+02 |
| 41 | 52 | 2.4395485475E+00 | 1.1250004053E+02 | -8.1775863426E+02 |
| 41 | 53 | 2.4395485475E+00 | 1.1300004053E+02 | -8.1775860888E+02 |
| 41 | 54 | 2.4395485475E+00 | 1.1350004053E+02 | -8.1775858312E+02 |
| 41 | 55 | 2.4395485475E+00 | 1.1400004053E+02 | -8.1775855634E+02 |
| 41 | 56 | 2.4395485475E+00 | 1.1450004053E+02 | -8.1775852812E+02 |
| 41 | 57 | 2.4395485475E+00 | 1.1500004053E+02 | -8.1775849860E+02 |
| 41 | 58 | 2.4395485475E+00 | 1.1550004053E+02 | -8.1775846775E+02 |
| 41 | 59 | 2.4395485475E+00 | 1.1600004053E+02 | -8.1775843610E+02 |
| 41 | 60 | 2.4395485475E+00 | 1.1650004053E+02 | -8.1775840388E+02 |
| 41 | 61 | 2.4395485475E+00 | 1.1700004053E+02 | -8.1775837180E+02 |
| 42 | 1  | 2.4495485475E+00 | 8.7000040532E+01 | -8.1775605417E+02 |

|    |    |                  |                  |                   |
|----|----|------------------|------------------|-------------------|
| 42 | 2  | 2.4495485475E+00 | 8.7500040532E+01 | -8.1775603277E+02 |
| 42 | 3  | 2.4495485475E+00 | 8.8000040532E+01 | -8.1775614946E+02 |
| 42 | 4  | 2.4495485475E+00 | 8.8500040532E+01 | -8.1775621144E+02 |
| 42 | 5  | 2.4495485475E+00 | 8.9000040532E+01 | -8.1775628573E+02 |
| 42 | 6  | 2.4495485475E+00 | 8.9500040532E+01 | -8.1775635366E+02 |
| 42 | 7  | 2.4495485475E+00 | 9.0000040532E+01 | -8.1775635943E+02 |
| 42 | 8  | 2.4495485475E+00 | 9.0500040532E+01 | -8.1775651771E+02 |
| 42 | 9  | 2.4495485475E+00 | 9.1000040532E+01 | -8.1775650157E+02 |
| 42 | 10 | 2.4495485475E+00 | 9.1500040532E+01 | -8.1775669645E+02 |
| 42 | 11 | 2.4495485475E+00 | 9.2000040532E+01 | -8.1775680935E+02 |
| 42 | 12 | 2.4495485475E+00 | 9.2500040532E+01 | -8.1775689236E+02 |
| 42 | 13 | 2.4495485475E+00 | 9.3000040532E+01 | -8.1775704519E+02 |
| 42 | 14 | 2.4495485475E+00 | 9.3500040532E+01 | -8.1775716581E+02 |
| 42 | 15 | 2.4495485475E+00 | 9.4000040532E+01 | -8.1775728793E+02 |
| 42 | 16 | 2.4495485475E+00 | 9.4500040532E+01 | -8.1775741088E+02 |
| 42 | 17 | 2.4495485475E+00 | 9.5000040532E+01 | -8.1775753315E+02 |
| 42 | 18 | 2.4495485475E+00 | 9.5500040532E+01 | -8.1775765390E+02 |
| 42 | 19 | 2.4495485475E+00 | 9.6000040532E+01 | -8.1775776991E+02 |
| 42 | 20 | 2.4495485475E+00 | 9.6500040532E+01 | -8.1775787952E+02 |
| 42 | 21 | 2.4495485475E+00 | 9.7000040532E+01 | -8.1775798332E+02 |
| 42 | 22 | 2.4495485475E+00 | 9.7500040532E+01 | -8.1775808069E+02 |
| 42 | 23 | 2.4495485475E+00 | 9.8000040532E+01 | -8.1775817102E+02 |
| 42 | 24 | 2.4495485475E+00 | 9.8500040532E+01 | -8.1775825533E+02 |
| 42 | 25 | 2.4495485475E+00 | 9.9000040532E+01 | -8.1775833258E+02 |
| 42 | 26 | 2.4495485475E+00 | 9.9500040532E+01 | -8.1775840380E+02 |
| 42 | 27 | 2.4495485475E+00 | 1.0000004053E+02 | -8.1775846769E+02 |
| 42 | 28 | 2.4495485475E+00 | 1.0050004053E+02 | -8.1775852584E+02 |
| 42 | 29 | 2.4495485475E+00 | 1.0100004053E+02 | -8.1775857705E+02 |
| 42 | 30 | 2.4495485475E+00 | 1.0150004053E+02 | -8.1775862257E+02 |
| 42 | 31 | 2.4495485475E+00 | 1.0200004053E+02 | -8.1775866139E+02 |
| 42 | 32 | 2.4495485475E+00 | 1.0250004053E+02 | -8.1775869408E+02 |
| 42 | 33 | 2.4495485475E+00 | 1.0300004053E+02 | -8.1775872067E+02 |
| 42 | 34 | 2.4495485475E+00 | 1.0350004053E+02 | -8.1775874160E+02 |
| 42 | 35 | 2.4495485475E+00 | 1.0400004053E+02 | -8.1775875676E+02 |
| 42 | 36 | 2.4495485475E+00 | 1.0450004053E+02 | -8.1775876658E+02 |
| 42 | 37 | 2.4495485475E+00 | 1.0500004053E+02 | -8.1775877153E+02 |
| 42 | 38 | 2.4495485475E+00 | 1.0550004053E+02 | -8.1775877203E+02 |
| 42 | 39 | 2.4495485475E+00 | 1.0600004053E+02 | -8.1775876948E+02 |
| 42 | 40 | 2.4495485475E+00 | 1.0650004053E+02 | -8.1775878452E+02 |
| 42 | 41 | 2.4495485475E+00 | 1.0700004053E+02 | -8.1775878865E+02 |
| 42 | 42 | 2.4495485475E+00 | 1.0750004053E+02 | -8.1775878736E+02 |
| 42 | 43 | 2.4495485475E+00 | 1.0800004053E+02 | -8.1775878155E+02 |
| 42 | 44 | 2.4495485475E+00 | 1.0850004053E+02 | -8.1775877231E+02 |
| 42 | 45 | 2.4495485475E+00 | 1.0900004053E+02 | -8.1775876009E+02 |
| 42 | 46 | 2.4495485475E+00 | 1.0950004053E+02 | -8.1775874526E+02 |
| 42 | 47 | 2.4495485475E+00 | 1.1000004053E+02 | -8.1775872820E+02 |
| 42 | 48 | 2.4495485475E+00 | 1.1050004053E+02 | -8.1775870991E+02 |
| 42 | 49 | 2.4495485475E+00 | 1.1100004053E+02 | -8.1775877417E+02 |
| 42 | 50 | 2.4495485475E+00 | 1.1150004053E+02 | -8.1775874908E+02 |
| 42 | 51 | 2.4495485475E+00 | 1.1200004053E+02 | -8.1775872483E+02 |
| 42 | 52 | 2.4495485475E+00 | 1.1250004053E+02 | -8.1775870208E+02 |
| 42 | 53 | 2.4495485475E+00 | 1.1300004053E+02 | -8.1775868014E+02 |



|    |    |                  |                  |                   |
|----|----|------------------|------------------|-------------------|
| 42 | 54 | 2.4495485475E+00 | 1.1350004053E+02 | -8.1775865761E+02 |
| 42 | 55 | 2.4495485475E+00 | 1.1400004053E+02 | -8.1775863391E+02 |
| 42 | 56 | 2.4495485475E+00 | 1.1450004053E+02 | -8.1775860873E+02 |
| 42 | 57 | 2.4495485475E+00 | 1.1500004053E+02 | -8.1775858223E+02 |
| 42 | 58 | 2.4495485475E+00 | 1.1550004053E+02 | -8.1775855440E+02 |
| 42 | 59 | 2.4495485475E+00 | 1.1600004053E+02 | -8.1775852580E+02 |
| 42 | 60 | 2.4495485475E+00 | 1.1650004053E+02 | -8.1775849660E+02 |
| 42 | 61 | 2.4495485475E+00 | 1.1700004053E+02 | -8.1775846765E+02 |
| 43 | 1  | 2.4595485475E+00 | 8.7000040532E+01 | -8.1775569585E+02 |
| 43 | 2  | 2.4595485475E+00 | 8.7500040532E+01 | -8.1775574120E+02 |
| 43 | 3  | 2.4595485475E+00 | 8.8000040532E+01 | -8.1775579020E+02 |
| 43 | 4  | 2.4595485475E+00 | 8.8500040532E+01 | -8.1775591982E+02 |
| 43 | 5  | 2.4595485475E+00 | 8.9000040532E+01 | -8.1775596472E+02 |
| 43 | 6  | 2.4595485475E+00 | 8.9500040532E+01 | -8.1775609051E+02 |
| 43 | 7  | 2.4595485475E+00 | 9.0000040532E+01 | -8.1775617818E+02 |
| 43 | 8  | 2.4595485475E+00 | 9.0500040532E+01 | -8.1775623467E+02 |
| 43 | 9  | 2.4595485475E+00 | 9.1000040532E+01 | -8.1775641287E+02 |
| 43 | 10 | 2.4595485475E+00 | 9.1500040532E+01 | -8.1775651161E+02 |
| 43 | 11 | 2.4595485475E+00 | 9.2000040532E+01 | -8.1775669239E+02 |
| 43 | 12 | 2.4595485475E+00 | 9.2500040532E+01 | -8.1775683607E+02 |
| 43 | 13 | 2.4595485475E+00 | 9.3000040532E+01 | -8.1775697870E+02 |
| 43 | 14 | 2.4595485475E+00 | 9.3500040532E+01 | -8.1775712373E+02 |
| 43 | 15 | 2.4595485475E+00 | 9.4000040532E+01 | -8.1775726554E+02 |
| 43 | 16 | 2.4595485475E+00 | 9.4500040532E+01 | -8.1775740633E+02 |
| 43 | 17 | 2.4595485475E+00 | 9.5000040532E+01 | -8.1775754117E+02 |
| 43 | 18 | 2.4595485475E+00 | 9.5500040532E+01 | -8.1775767024E+02 |
| 43 | 19 | 2.4595485475E+00 | 9.6000040532E+01 | -8.1775779111E+02 |
| 43 | 20 | 2.4595485475E+00 | 9.6500040532E+01 | -8.1775790600E+02 |
| 43 | 21 | 2.4595485475E+00 | 9.7000040532E+01 | -8.1775801355E+02 |
| 43 | 22 | 2.4595485475E+00 | 9.7500040532E+01 | -8.1775811430E+02 |
| 43 | 23 | 2.4595485475E+00 | 9.8000040532E+01 | -8.1775820766E+02 |
| 43 | 24 | 2.4595485475E+00 | 9.8500040532E+01 | -8.1775829434E+02 |
| 43 | 25 | 2.4595485475E+00 | 9.9000040532E+01 | -8.1775837402E+02 |
| 43 | 26 | 2.4595485475E+00 | 9.9500040532E+01 | -8.1775844745E+02 |
| 43 | 27 | 2.4595485475E+00 | 1.0000004053E+02 | -8.1775851320E+02 |
| 43 | 28 | 2.4595485475E+00 | 1.0050004053E+02 | -8.1775857348E+02 |
| 43 | 29 | 2.4595485475E+00 | 1.0100004053E+02 | -8.1775862607E+02 |
| 43 | 30 | 2.4595485475E+00 | 1.0150004053E+02 | -8.1775867307E+02 |
| 43 | 31 | 2.4595485475E+00 | 1.0200004053E+02 | -8.1775871318E+02 |
| 43 | 32 | 2.4595485475E+00 | 1.0250004053E+02 | -8.1775874745E+02 |
| 43 | 33 | 2.4595485475E+00 | 1.0300004053E+02 | -8.1775877531E+02 |
| 43 | 34 | 2.4595485475E+00 | 1.0350004053E+02 | -8.1775879745E+02 |
| 43 | 35 | 2.4595485475E+00 | 1.0400004053E+02 | -8.1775881374E+02 |
| 43 | 36 | 2.4595485475E+00 | 1.0450004053E+02 | -8.1775882469E+02 |
| 43 | 37 | 2.4595485475E+00 | 1.0500004053E+02 | -8.1775883060E+02 |
| 43 | 38 | 2.4595485475E+00 | 1.0550004053E+02 | -8.1775883205E+02 |
| 43 | 39 | 2.4595485475E+00 | 1.0600004053E+02 | -8.1775883062E+02 |
| 43 | 40 | 2.4595485475E+00 | 1.0650004053E+02 | -8.1775884984E+02 |
| 43 | 41 | 2.4595485475E+00 | 1.0700004053E+02 | -8.1775885453E+02 |
| 43 | 42 | 2.4595485475E+00 | 1.0750004053E+02 | -8.1775885431E+02 |
| 43 | 43 | 2.4595485475E+00 | 1.0800004053E+02 | -8.1775885000E+02 |
| 43 | 44 | 2.4595485475E+00 | 1.0850004053E+02 | -8.1775884240E+02 |

|    |    |                  |                  |                   |
|----|----|------------------|------------------|-------------------|
| 43 | 45 | 2.4595485475E+00 | 1.0900004053E+02 | -8.1775883184E+02 |
| 43 | 46 | 2.4595485475E+00 | 1.0950004053E+02 | -8.1775881874E+02 |
| 43 | 47 | 2.4595485475E+00 | 1.1000004053E+02 | -8.1775880363E+02 |
| 43 | 48 | 2.4595485475E+00 | 1.1050004053E+02 | -8.1775878780E+02 |
| 43 | 49 | 2.4595485475E+00 | 1.1100004053E+02 | -8.1775885005E+02 |
| 43 | 50 | 2.4595485475E+00 | 1.1150004053E+02 | -8.1775882772E+02 |
| 43 | 51 | 2.4595485475E+00 | 1.1200004053E+02 | -8.1775880694E+02 |
| 43 | 52 | 2.4595485475E+00 | 1.1250004053E+02 | -8.1775878792E+02 |
| 43 | 53 | 2.4595485475E+00 | 1.1300004053E+02 | -8.1775876916E+02 |
| 43 | 54 | 2.4595485475E+00 | 1.1350004053E+02 | -8.1775874956E+02 |
| 43 | 55 | 2.4595485475E+00 | 1.1400004053E+02 | -8.1775872873E+02 |
| 43 | 56 | 2.4595485475E+00 | 1.1450004053E+02 | -8.1775870637E+02 |
| 43 | 57 | 2.4595485475E+00 | 1.1500004053E+02 | -8.1775868266E+02 |
| 43 | 58 | 2.4595485475E+00 | 1.1550004053E+02 | -8.1775865772E+02 |
| 43 | 59 | 2.4595485475E+00 | 1.1600004053E+02 | -8.1775863204E+02 |
| 43 | 60 | 2.4595485475E+00 | 1.1650004053E+02 | -8.1775860591E+02 |
| 43 | 61 | 2.4595485475E+00 | 1.1700004053E+02 | -8.1775858006E+02 |
| 44 | 1  | 2.4695485475E+00 | 8.7000040532E+01 | -8.1775535475E+02 |
| 44 | 2  | 2.4695485475E+00 | 8.7500040532E+01 | -8.1775544533E+02 |
| 44 | 3  | 2.4695485475E+00 | 8.8000040532E+01 | -8.1775554160E+02 |
| 44 | 4  | 2.4695485475E+00 | 8.8500040532E+01 | -8.1775563880E+02 |
| 44 | 5  | 2.4695485475E+00 | 8.9000040532E+01 | -8.1775563974E+02 |
| 44 | 6  | 2.4695485475E+00 | 8.9500040532E+01 | -8.1775585113E+02 |
| 44 | 7  | 2.4695485475E+00 | 9.0000040532E+01 | -8.1775593846E+02 |
| 44 | 8  | 2.4695485475E+00 | 9.0500040532E+01 | -8.1775616278E+02 |
| 44 | 9  | 2.4695485475E+00 | 9.1000040532E+01 | -8.1775627238E+02 |
| 44 | 10 | 2.4695485475E+00 | 9.1500040532E+01 | -8.1775649853E+02 |
| 44 | 11 | 2.4695485475E+00 | 9.2000040532E+01 | -8.1775661921E+02 |
| 44 | 12 | 2.4695485475E+00 | 9.2500040532E+01 | -8.1775683095E+02 |
| 44 | 13 | 2.4695485475E+00 | 9.3000040532E+01 | -8.1775699285E+02 |
| 44 | 14 | 2.4695485475E+00 | 9.3500040532E+01 | -8.1775715379E+02 |
| 44 | 15 | 2.4695485475E+00 | 9.4000040532E+01 | -8.1775730732E+02 |
| 44 | 16 | 2.4695485475E+00 | 9.4500040532E+01 | -8.1775745456E+02 |
| 44 | 17 | 2.4695485475E+00 | 9.5000040532E+01 | -8.1775759363E+02 |
| 44 | 18 | 2.4695485475E+00 | 9.5500040532E+01 | -8.1775772639E+02 |
| 44 | 19 | 2.4695485475E+00 | 9.6000040532E+01 | -8.1775785012E+02 |
| 44 | 20 | 2.4695485475E+00 | 9.6500040532E+01 | -8.1775796690E+02 |
| 44 | 21 | 2.4695485475E+00 | 9.7000040532E+01 | -8.1775807610E+02 |
| 44 | 22 | 2.4695485475E+00 | 9.7500040532E+01 | -8.1775817841E+02 |
| 44 | 23 | 2.4695485475E+00 | 9.8000040532E+01 | -8.1775827314E+02 |
| 44 | 24 | 2.4695485475E+00 | 9.8500040532E+01 | -8.1775836077E+02 |
| 44 | 25 | 2.4695485475E+00 | 9.9000040532E+01 | -8.1775844149E+02 |
| 44 | 26 | 2.4695485475E+00 | 9.9500040532E+01 | -8.1775851569E+02 |
| 44 | 27 | 2.4695485475E+00 | 1.0000004053E+02 | -8.1775858210E+02 |
| 44 | 28 | 2.4695485475E+00 | 1.0050004053E+02 | -8.1775864328E+02 |
| 44 | 29 | 2.4695485475E+00 | 1.0100004053E+02 | -8.1775869682E+02 |
| 44 | 30 | 2.4695485475E+00 | 1.0150004053E+02 | -8.1775874441E+02 |
| 44 | 31 | 2.4695485475E+00 | 1.0200004053E+02 | -8.1775878532E+02 |
| 44 | 32 | 2.4695485475E+00 | 1.0250004053E+02 | -8.1775881995E+02 |
| 44 | 33 | 2.4695485475E+00 | 1.0300004053E+02 | -8.1775884840E+02 |
| 44 | 34 | 2.4695485475E+00 | 1.0350004053E+02 | -8.1775887125E+02 |
| 44 | 35 | 2.4695485475E+00 | 1.0400004053E+02 | -8.1775888814E+02 |

|    |    |                  |                  |                   |
|----|----|------------------|------------------|-------------------|
| 44 | 36 | 2.4695485475E+00 | 1.0450004053E+02 | -8.1775889981E+02 |
| 44 | 37 | 2.4695485475E+00 | 1.0500004053E+02 | -8.1775890652E+02 |
| 44 | 38 | 2.4695485475E+00 | 1.0550004053E+02 | -8.1775890903E+02 |
| 44 | 39 | 2.4695485475E+00 | 1.0600004053E+02 | -8.1775890954E+02 |
| 44 | 40 | 2.4695485475E+00 | 1.0650004053E+02 | -8.1775893363E+02 |
| 44 | 41 | 2.4695485475E+00 | 1.0700004053E+02 | -8.1775893908E+02 |
| 44 | 42 | 2.4695485475E+00 | 1.0750004053E+02 | -8.1775893952E+02 |
| 44 | 43 | 2.4695485475E+00 | 1.0800004053E+02 | -8.1775893646E+02 |
| 44 | 44 | 2.4695485475E+00 | 1.0850004053E+02 | -8.1775893001E+02 |
| 44 | 45 | 2.4695485475E+00 | 1.0900004053E+02 | -8.1775892078E+02 |
| 44 | 46 | 2.4695485475E+00 | 1.0950004053E+02 | -8.1775890925E+02 |
| 44 | 47 | 2.4695485475E+00 | 1.1000004053E+02 | -8.1775889602E+02 |
| 44 | 48 | 2.4695485475E+00 | 1.1050004053E+02 | -8.1775888291E+02 |
| 44 | 49 | 2.4695485475E+00 | 1.1100004053E+02 | -8.1775894236E+02 |
| 44 | 50 | 2.4695485475E+00 | 1.1150004053E+02 | -8.1775892324E+02 |
| 44 | 51 | 2.4695485475E+00 | 1.1200004053E+02 | -8.1775890643E+02 |
| 44 | 52 | 2.4695485475E+00 | 1.1250004053E+02 | -8.1775889088E+02 |
| 44 | 53 | 2.4695485475E+00 | 1.1300004053E+02 | -8.1775887503E+02 |
| 44 | 54 | 2.4695485475E+00 | 1.1350004053E+02 | -8.1775885812E+02 |
| 44 | 55 | 2.4695485475E+00 | 1.1400004053E+02 | -8.1775883984E+02 |
| 44 | 56 | 2.4695485475E+00 | 1.1450004053E+02 | -8.1775882006E+02 |
| 44 | 57 | 2.4695485475E+00 | 1.1500004053E+02 | -8.1775879898E+02 |
| 44 | 58 | 2.4695485475E+00 | 1.1550004053E+02 | -8.1775877682E+02 |
| 44 | 59 | 2.4695485475E+00 | 1.1600004053E+02 | -8.1775875395E+02 |
| 44 | 60 | 2.4695485475E+00 | 1.1650004053E+02 | -8.1775873084E+02 |
| 44 | 61 | 2.4695485475E+00 | 1.1700004053E+02 | -8.1775870808E+02 |
| 45 | 1  | 2.4795485475E+00 | 8.7000040532E+01 | -8.1775505474E+02 |
| 45 | 2  | 2.4795485475E+00 | 8.7500040532E+01 | -8.1775516433E+02 |
| 45 | 3  | 2.4795485475E+00 | 8.8000040532E+01 | -8.1775525972E+02 |
| 45 | 4  | 2.4795485475E+00 | 8.8500040532E+01 | -8.1775540843E+02 |
| 45 | 5  | 2.4795485475E+00 | 8.9000040532E+01 | -8.1775558138E+02 |
| 45 | 6  | 2.4795485475E+00 | 8.9500040532E+01 | -8.1775577148E+02 |
| 45 | 7  | 2.4795485475E+00 | 9.0000040532E+01 | -8.1775570503E+02 |
| 45 | 8  | 2.4795485475E+00 | 9.0500040532E+01 | -8.1775615954E+02 |
| 45 | 9  | 2.4795485475E+00 | 9.1000040532E+01 | -8.1775634787E+02 |
| 45 | 10 | 2.4795485475E+00 | 9.1500040532E+01 | -8.1775653509E+02 |
| 45 | 11 | 2.4795485475E+00 | 9.2000040532E+01 | -8.1775671772E+02 |
| 45 | 12 | 2.4795485475E+00 | 9.2500040532E+01 | -8.1775689709E+02 |
| 45 | 13 | 2.4795485475E+00 | 9.3000040532E+01 | -8.1775704258E+02 |
| 45 | 14 | 2.4795485475E+00 | 9.3500040532E+01 | -8.1775723546E+02 |
| 45 | 15 | 2.4795485475E+00 | 9.4000040532E+01 | -8.1775739289E+02 |
| 45 | 16 | 2.4795485475E+00 | 9.4500040532E+01 | -8.1775754251E+02 |
| 45 | 17 | 2.4795485475E+00 | 9.5000040532E+01 | -8.1775768284E+02 |
| 45 | 18 | 2.4795485475E+00 | 9.5500040532E+01 | -8.1775781605E+02 |
| 45 | 19 | 2.4795485475E+00 | 9.6000040532E+01 | -8.1775794045E+02 |
| 45 | 20 | 2.4795485475E+00 | 9.6500040532E+01 | -8.1775805808E+02 |
| 45 | 21 | 2.4795485475E+00 | 9.7000040532E+01 | -8.1775816728E+02 |
| 45 | 22 | 2.4795485475E+00 | 9.7500040532E+01 | -8.1775826979E+02 |
| 45 | 23 | 2.4795485475E+00 | 9.8000040532E+01 | -8.1775836417E+02 |
| 45 | 24 | 2.4795485475E+00 | 9.8500040532E+01 | -8.1775845217E+02 |
| 45 | 25 | 2.4795485475E+00 | 9.9000040532E+01 | -8.1775853245E+02 |
| 45 | 26 | 2.4795485475E+00 | 9.9500040532E+01 | -8.1775860638E+02 |



|    |    |                  |                  |                   |
|----|----|------------------|------------------|-------------------|
| 45 | 27 | 2.4795485475E+00 | 1.0000004053E+02 | -8.1775867312E+02 |
| 45 | 28 | 2.4795485475E+00 | 1.0050004053E+02 | -8.1775873352E+02 |
| 45 | 29 | 2.4795485475E+00 | 1.0100004053E+02 | -8.1775878710E+02 |
| 45 | 30 | 2.4795485475E+00 | 1.0150004053E+02 | -8.1775883457E+02 |
| 45 | 31 | 2.4795485475E+00 | 1.0200004053E+02 | -8.1775887537E+02 |
| 45 | 32 | 2.4795485475E+00 | 1.0250004053E+02 | -8.1775891045E+02 |
| 45 | 33 | 2.4795485475E+00 | 1.0300004053E+02 | -8.1775893894E+02 |
| 45 | 34 | 2.4795485475E+00 | 1.0350004053E+02 | -8.1775896204E+02 |
| 45 | 35 | 2.4795485475E+00 | 1.0400004053E+02 | -8.1775897932E+02 |
| 45 | 36 | 2.4795485475E+00 | 1.0450004053E+02 | -8.1775899144E+02 |
| 45 | 37 | 2.4795485475E+00 | 1.0500004053E+02 | -8.1775899864E+02 |
| 45 | 38 | 2.4795485475E+00 | 1.0550004053E+02 | -8.1775900901E+02 |
| 45 | 39 | 2.4795485475E+00 | 1.0600004053E+02 | -8.1775902301E+02 |
| 45 | 40 | 2.4795485475E+00 | 1.0650004053E+02 | -8.1775903517E+02 |
| 45 | 41 | 2.4795485475E+00 | 1.0700004053E+02 | -8.1775904051E+02 |
| 45 | 42 | 2.4795485475E+00 | 1.0750004053E+02 | -8.1775904184E+02 |
| 45 | 43 | 2.4795485475E+00 | 1.0800004053E+02 | -8.1775903945E+02 |
| 45 | 44 | 2.4795485475E+00 | 1.0850004053E+02 | -8.1775903404E+02 |
| 45 | 45 | 2.4795485475E+00 | 1.0900004053E+02 | -8.1775902602E+02 |
| 45 | 46 | 2.4795485475E+00 | 1.0950004053E+02 | -8.1775901551E+02 |
| 45 | 47 | 2.4795485475E+00 | 1.1000004053E+02 | -8.1775900439E+02 |
| 45 | 48 | 2.4795485475E+00 | 1.1050004053E+02 | -8.1775899497E+02 |
| 45 | 49 | 2.4795485475E+00 | 1.1100004053E+02 | -8.1775905077E+02 |
| 45 | 50 | 2.4795485475E+00 | 1.1150004053E+02 | -8.1775903560E+02 |
| 45 | 51 | 2.4795485475E+00 | 1.1200004053E+02 | -8.1775902260E+02 |
| 45 | 52 | 2.4795485475E+00 | 1.1250004053E+02 | -8.1775901019E+02 |
| 45 | 53 | 2.4795485475E+00 | 1.1300004053E+02 | -8.1775899682E+02 |
| 45 | 54 | 2.4795485475E+00 | 1.1350004053E+02 | -8.1775898227E+02 |
| 45 | 55 | 2.4795485475E+00 | 1.1400004053E+02 | -8.1775896635E+02 |
| 45 | 56 | 2.4795485475E+00 | 1.1450004053E+02 | -8.1775894897E+02 |
| 45 | 57 | 2.4795485475E+00 | 1.1500004053E+02 | -8.1775893037E+02 |
| 45 | 58 | 2.4795485475E+00 | 1.1550004053E+02 | -8.1775891084E+02 |
| 45 | 59 | 2.4795485475E+00 | 1.1600004053E+02 | -8.1775889076E+02 |
| 45 | 60 | 2.4795485475E+00 | 1.1650004053E+02 | -8.1775887064E+02 |
| 45 | 61 | 2.4795485475E+00 | 1.1700004053E+02 | -8.1775885087E+02 |
| 46 | 1  | 2.4895485475E+00 | 8.7000040532E+01 | -8.1775477275E+02 |
| 46 | 2  | 2.4895485475E+00 | 8.7500040532E+01 | -8.1775496526E+02 |
| 46 | 3  | 2.4895485475E+00 | 8.8000040532E+01 | -8.1775498009E+02 |
| 46 | 4  | 2.4895485475E+00 | 8.8500040532E+01 | -8.1775538448E+02 |
| 46 | 5  | 2.4895485475E+00 | 8.9000040532E+01 | -8.1775560410E+02 |
| 46 | 6  | 2.4895485475E+00 | 8.9500040532E+01 | -8.1775582019E+02 |
| 46 | 7  | 2.4895485475E+00 | 9.0000040532E+01 | -8.1775603145E+02 |
| 46 | 8  | 2.4895485475E+00 | 9.0500040532E+01 | -8.1775623990E+02 |
| 46 | 9  | 2.4895485475E+00 | 9.1000040532E+01 | -8.1775644161E+02 |
| 46 | 10 | 2.4895485475E+00 | 9.1500040532E+01 | -8.1775663945E+02 |
| 46 | 11 | 2.4895485475E+00 | 9.2000040532E+01 | -8.1775683052E+02 |
| 46 | 12 | 2.4895485475E+00 | 9.2500040532E+01 | -8.1775701380E+02 |
| 46 | 13 | 2.4895485475E+00 | 9.3000040532E+01 | -8.1775718864E+02 |
| 46 | 14 | 2.4895485475E+00 | 9.3500040532E+01 | -8.1775735520E+02 |
| 46 | 15 | 2.4895485475E+00 | 9.4000040532E+01 | -8.1775751261E+02 |
| 46 | 16 | 2.4895485475E+00 | 9.4500040532E+01 | -8.1775766228E+02 |
| 46 | 17 | 2.4895485475E+00 | 9.5000040532E+01 | -8.1775780241E+02 |

|    |    |                  |                  |                   |
|----|----|------------------|------------------|-------------------|
| 46 | 18 | 2.4895485475E+00 | 9.5500040532E+01 | -8.1775793524E+02 |
| 46 | 19 | 2.4895485475E+00 | 9.6000040532E+01 | -8.1775805879E+02 |
| 46 | 20 | 2.4895485475E+00 | 9.6500040532E+01 | -8.1775817554E+02 |
| 46 | 21 | 2.4895485475E+00 | 9.7000040532E+01 | -8.1775828378E+02 |
| 46 | 22 | 2.4895485475E+00 | 9.7500040532E+01 | -8.1775838513E+02 |
| 46 | 23 | 2.4895485475E+00 | 9.8000040532E+01 | -8.1775847869E+02 |
| 46 | 24 | 2.4895485475E+00 | 9.8500040532E+01 | -8.1775856550E+02 |
| 46 | 25 | 2.4895485475E+00 | 9.9000040532E+01 | -8.1775864489E+02 |
| 46 | 26 | 2.4895485475E+00 | 9.9500040532E+01 | -8.1775871761E+02 |
| 46 | 27 | 2.4895485475E+00 | 1.0000004053E+02 | -8.1775878324E+02 |
| 46 | 28 | 2.4895485475E+00 | 1.0050004053E+02 | -8.1775884289E+02 |
| 46 | 29 | 2.4895485475E+00 | 1.0100004053E+02 | -8.1775889570E+02 |
| 46 | 30 | 2.4895485475E+00 | 1.0150004053E+02 | -8.1775894264E+02 |
| 46 | 31 | 2.4895485475E+00 | 1.0200004053E+02 | -8.1775898295E+02 |
| 46 | 32 | 2.4895485475E+00 | 1.0250004053E+02 | -8.1775901761E+02 |
| 46 | 33 | 2.4895485475E+00 | 1.0300004053E+02 | -8.1775904623E+02 |
| 46 | 34 | 2.4895485475E+00 | 1.0350004053E+02 | -8.1775906913E+02 |
| 46 | 35 | 2.4895485475E+00 | 1.0400004053E+02 | -8.1775908651E+02 |
| 46 | 36 | 2.4895485475E+00 | 1.0450004053E+02 | -8.1775909881E+02 |
| 46 | 37 | 2.4895485475E+00 | 1.0500004053E+02 | -8.1775910684E+02 |
| 46 | 38 | 2.4895485475E+00 | 1.0550004053E+02 | -8.1775912436E+02 |
| 46 | 39 | 2.4895485475E+00 | 1.0600004053E+02 | -8.1775914273E+02 |
| 46 | 40 | 2.4895485475E+00 | 1.0650004053E+02 | -8.1775915236E+02 |
| 46 | 41 | 2.4895485475E+00 | 1.0700004053E+02 | -8.1775915808E+02 |
| 46 | 42 | 2.4895485475E+00 | 1.0750004053E+02 | -8.1775915965E+02 |
| 46 | 43 | 2.4895485475E+00 | 1.0800004053E+02 | -8.1775915810E+02 |
| 46 | 44 | 2.4895485475E+00 | 1.0850004053E+02 | -8.1775915358E+02 |
| 46 | 45 | 2.4895485475E+00 | 1.0900004053E+02 | -8.1775914657E+02 |
| 46 | 46 | 2.4895485475E+00 | 1.0950004053E+02 | -8.1775913793E+02 |
| 46 | 47 | 2.4895485475E+00 | 1.1000004053E+02 | -8.1775912833E+02 |
| 46 | 48 | 2.4895485475E+00 | 1.1050004053E+02 | -8.1775912296E+02 |
| 46 | 49 | 2.4895485475E+00 | 1.1100004053E+02 | -8.1775917525E+02 |
| 46 | 50 | 2.4895485475E+00 | 1.1150004053E+02 | -8.1775916418E+02 |
| 46 | 51 | 2.4895485475E+00 | 1.1200004053E+02 | -8.1775915453E+02 |
| 46 | 52 | 2.4895485475E+00 | 1.1250004053E+02 | -8.1775914463E+02 |
| 46 | 53 | 2.4895485475E+00 | 1.1300004053E+02 | -8.1775913357E+02 |
| 46 | 54 | 2.4895485475E+00 | 1.1350004053E+02 | -8.1775912112E+02 |
| 46 | 55 | 2.4895485475E+00 | 1.1400004053E+02 | -8.1775910735E+02 |
| 46 | 56 | 2.4895485475E+00 | 1.1450004053E+02 | -8.1775909225E+02 |
| 46 | 57 | 2.4895485475E+00 | 1.1500004053E+02 | -8.1775907603E+02 |
| 46 | 58 | 2.4895485475E+00 | 1.1550004053E+02 | -8.1775905906E+02 |
| 46 | 59 | 2.4895485475E+00 | 1.1600004053E+02 | -8.1775904173E+02 |
| 46 | 60 | 2.4895485475E+00 | 1.1650004053E+02 | -8.1775902447E+02 |
| 46 | 61 | 2.4895485475E+00 | 1.1700004053E+02 | -8.1775900770E+02 |
| 47 | 1  | 2.4995485475E+00 | 8.7000040532E+01 | -8.1775449505E+02 |
| 47 | 2  | 2.4995485475E+00 | 8.7500040532E+01 | -8.1775500493E+02 |
| 47 | 3  | 2.4995485475E+00 | 8.8000040532E+01 | -8.1775524699E+02 |
| 47 | 4  | 2.4995485475E+00 | 8.8500040532E+01 | -8.1775548471E+02 |
| 47 | 5  | 2.4995485475E+00 | 8.9000040532E+01 | -8.1775571697E+02 |
| 47 | 6  | 2.4995485475E+00 | 8.9500040532E+01 | -8.1775594503E+02 |
| 47 | 7  | 2.4995485475E+00 | 9.0000040532E+01 | -8.1775614208E+02 |
| 47 | 8  | 2.4995485475E+00 | 9.0500040532E+01 | -8.1775638255E+02 |

|       |                  |                  |                   |
|-------|------------------|------------------|-------------------|
| 47 9  | 2.4995485475E+00 | 9.1000040532E+01 | -8.1775659142E+02 |
| 47 10 | 2.4995485475E+00 | 9.1500040532E+01 | -8.1775679173E+02 |
| 47 11 | 2.4995485475E+00 | 9.2000040532E+01 | -8.1775698293E+02 |
| 47 12 | 2.4995485475E+00 | 9.2500040532E+01 | -8.1775716694E+02 |
| 47 13 | 2.4995485475E+00 | 9.3000040532E+01 | -8.1775734000E+02 |
| 47 14 | 2.4995485475E+00 | 9.3500040532E+01 | -8.1775750590E+02 |
| 47 15 | 2.4995485475E+00 | 9.4000040532E+01 | -8.1775766148E+02 |
| 47 16 | 2.4995485475E+00 | 9.4500040532E+01 | -8.1775781000E+02 |
| 47 17 | 2.4995485475E+00 | 9.5000040532E+01 | -8.1775794835E+02 |
| 47 18 | 2.4995485475E+00 | 9.5500040532E+01 | -8.1775807935E+02 |
| 47 19 | 2.4995485475E+00 | 9.6000040532E+01 | -8.1775820122E+02 |
| 47 20 | 2.4995485475E+00 | 9.6500040532E+01 | -8.1775831630E+02 |
| 47 21 | 2.4995485475E+00 | 9.7000040532E+01 | -8.1775842283E+02 |
| 47 22 | 2.4995485475E+00 | 9.7500040532E+01 | -8.1775852246E+02 |
| 47 23 | 2.4995485475E+00 | 9.8000040532E+01 | -8.1775861427E+02 |
| 47 24 | 2.4995485475E+00 | 9.8500040532E+01 | -8.1775869927E+02 |
| 47 25 | 2.4995485475E+00 | 9.9000040532E+01 | -8.1775877649E+02 |
| 47 26 | 2.4995485475E+00 | 9.9500040532E+01 | -8.1775884767E+02 |
| 47 27 | 2.4995485475E+00 | 1.0000004053E+02 | -8.1775891142E+02 |
| 47 28 | 2.4995485475E+00 | 1.0050004053E+02 | -8.1775896960E+02 |
| 47 29 | 2.4995485475E+00 | 1.0100004053E+02 | -8.1775902129E+02 |
| 47 30 | 2.4995485475E+00 | 1.0150004053E+02 | -8.1775906709E+02 |
| 47 31 | 2.4995485475E+00 | 1.0200004053E+02 | -8.1775910684E+02 |
| 47 32 | 2.4995485475E+00 | 1.0250004053E+02 | -8.1775914090E+02 |
| 47 33 | 2.4995485475E+00 | 1.0300004053E+02 | -8.1775916910E+02 |
| 47 34 | 2.4995485475E+00 | 1.0350004053E+02 | -8.1775919198E+02 |
| 47 35 | 2.4995485475E+00 | 1.0400004053E+02 | -8.1775920925E+02 |
| 47 36 | 2.4995485475E+00 | 1.0450004053E+02 | -8.1775922206E+02 |
| 47 37 | 2.4995485475E+00 | 1.0500004053E+02 | -8.1775923139E+02 |
| 47 38 | 2.4995485475E+00 | 1.0550004053E+02 | -8.1775926051E+02 |
| 47 39 | 2.4995485475E+00 | 1.0600004053E+02 | -8.1775927548E+02 |
| 47 40 | 2.4995485475E+00 | 1.0650004053E+02 | -8.1775928488E+02 |
| 47 41 | 2.4995485475E+00 | 1.0700004053E+02 | -8.1775929041E+02 |
| 47 42 | 2.4995485475E+00 | 1.0750004053E+02 | -8.1775929247E+02 |
| 47 43 | 2.4995485475E+00 | 1.0800004053E+02 | -8.1775929134E+02 |
| 47 44 | 2.4995485475E+00 | 1.0850004053E+02 | -8.1775928766E+02 |
| 47 45 | 2.4995485475E+00 | 1.0900004053E+02 | -8.1775928149E+02 |
| 47 46 | 2.4995485475E+00 | 1.0950004053E+02 | -8.1775927452E+02 |
| 47 47 | 2.4995485475E+00 | 1.1000004053E+02 | -8.1775926709E+02 |
| 47 48 | 2.4995485475E+00 | 1.1050004053E+02 | -8.1775926658E+02 |
| 47 49 | 2.4995485475E+00 | 1.1100004053E+02 | -8.1775931556E+02 |
| 47 50 | 2.4995485475E+00 | 1.1150004053E+02 | -8.1775930804E+02 |
| 47 51 | 2.4995485475E+00 | 1.1200004053E+02 | -8.1775930102E+02 |
| 47 52 | 2.4995485475E+00 | 1.1250004053E+02 | -8.1775929327E+02 |
| 47 53 | 2.4995485475E+00 | 1.1300004053E+02 | -8.1775928410E+02 |
| 47 54 | 2.4995485475E+00 | 1.1350004053E+02 | -8.1775927375E+02 |
| 47 55 | 2.4995485475E+00 | 1.1400004053E+02 | -8.1775926200E+02 |
| 47 56 | 2.4995485475E+00 | 1.1450004053E+02 | -8.1775924906E+02 |
| 47 57 | 2.4995485475E+00 | 1.1500004053E+02 | -8.1775923516E+02 |
| 47 58 | 2.4995485475E+00 | 1.1550004053E+02 | -8.1775922071E+02 |
| 47 59 | 2.4995485475E+00 | 1.1600004053E+02 | -8.1775920601E+02 |
| 47 60 | 2.4995485475E+00 | 1.1650004053E+02 | -8.1775919162E+02 |

|    |    |                  |                  |                   |
|----|----|------------------|------------------|-------------------|
| 47 | 61 | 2.4995485475E+00 | 1.1700004053E+02 | -8.1775917785E+02 |
| 48 | 1  | 2.5095485475E+00 | 8.7000040532E+01 | -8.1775489451E+02 |
| 48 | 2  | 2.5095485475E+00 | 8.7500040532E+01 | -8.1775515172E+02 |
| 48 | 3  | 2.5095485475E+00 | 8.8000040532E+01 | -8.1775540426E+02 |
| 48 | 4  | 2.5095485475E+00 | 8.8500040532E+01 | -8.1775565122E+02 |
| 48 | 5  | 2.5095485475E+00 | 8.9000040532E+01 | -8.1775589259E+02 |
| 48 | 6  | 2.5095485475E+00 | 8.9500040532E+01 | -8.1775612763E+02 |
| 48 | 7  | 2.5095485475E+00 | 9.0000040532E+01 | -8.1775635471E+02 |
| 48 | 8  | 2.5095485475E+00 | 9.0500040532E+01 | -8.1775657169E+02 |
| 48 | 9  | 2.5095485475E+00 | 9.1000040532E+01 | -8.1775677971E+02 |
| 48 | 10 | 2.5095485475E+00 | 9.1500040532E+01 | -8.1775697905E+02 |
| 48 | 11 | 2.5095485475E+00 | 9.2000040532E+01 | -8.1775716688E+02 |
| 48 | 12 | 2.5095485475E+00 | 9.2500040532E+01 | -8.1775734779E+02 |
| 48 | 13 | 2.5095485475E+00 | 9.3000040532E+01 | -8.1775751861E+02 |
| 48 | 14 | 2.5095485475E+00 | 9.3500040532E+01 | -8.1775768204E+02 |
| 48 | 15 | 2.5095485475E+00 | 9.4000040532E+01 | -8.1775783522E+02 |
| 48 | 16 | 2.5095485475E+00 | 9.4500040532E+01 | -8.1775798114E+02 |
| 48 | 17 | 2.5095485475E+00 | 9.5000040532E+01 | -8.1775811715E+02 |
| 48 | 18 | 2.5095485475E+00 | 9.5500040532E+01 | -8.1775824601E+02 |
| 48 | 19 | 2.5095485475E+00 | 9.6000040532E+01 | -8.1775836525E+02 |
| 48 | 20 | 2.5095485475E+00 | 9.6500040532E+01 | -8.1775847781E+02 |
| 48 | 21 | 2.5095485475E+00 | 9.7000040532E+01 | -8.1775858175E+02 |
| 48 | 22 | 2.5095485475E+00 | 9.7500040532E+01 | -8.1775867919E+02 |
| 48 | 23 | 2.5095485475E+00 | 9.8000040532E+01 | -8.1775876861E+02 |
| 48 | 24 | 2.5095485475E+00 | 9.8500040532E+01 | -8.1775885130E+02 |
| 48 | 25 | 2.5095485475E+00 | 9.9000040532E+01 | -8.1775892585E+02 |
| 48 | 26 | 2.5095485475E+00 | 9.9500040532E+01 | -8.1775899470E+02 |
| 48 | 27 | 2.5095485475E+00 | 1.0000004053E+02 | -8.1775905597E+02 |
| 48 | 28 | 2.5095485475E+00 | 1.0050004053E+02 | -8.1775911218E+02 |
| 48 | 29 | 2.5095485475E+00 | 1.0100004053E+02 | -8.1775916231E+02 |
| 48 | 30 | 2.5095485475E+00 | 1.0150004053E+02 | -8.1775920717E+02 |
| 48 | 31 | 2.5095485475E+00 | 1.0200004053E+02 | -8.1775924611E+02 |
| 48 | 32 | 2.5095485475E+00 | 1.0250004053E+02 | -8.1775927943E+02 |
| 48 | 33 | 2.5095485475E+00 | 1.0300004053E+02 | -8.1775930725E+02 |
| 48 | 34 | 2.5095485475E+00 | 1.0350004053E+02 | -8.1775933008E+02 |
| 48 | 35 | 2.5095485475E+00 | 1.0400004053E+02 | -8.1775934739E+02 |
| 48 | 36 | 2.5095485475E+00 | 1.0450004053E+02 | -8.1775936108E+02 |
| 48 | 37 | 2.5095485475E+00 | 1.0500004053E+02 | -8.1775938789E+02 |
| 48 | 38 | 2.5095485475E+00 | 1.0550004053E+02 | -8.1775940828E+02 |
| 48 | 39 | 2.5095485475E+00 | 1.0600004053E+02 | -8.1775942173E+02 |
| 48 | 40 | 2.5095485475E+00 | 1.0650004053E+02 | -8.1775943080E+02 |
| 48 | 41 | 2.5095485475E+00 | 1.0700004053E+02 | -8.1775943657E+02 |
| 48 | 42 | 2.5095485475E+00 | 1.0750004053E+02 | -8.1775943886E+02 |
| 48 | 43 | 2.5095485475E+00 | 1.0800004053E+02 | -8.1775943825E+02 |
| 48 | 44 | 2.5095485475E+00 | 1.0850004053E+02 | -8.1775943518E+02 |
| 48 | 45 | 2.5095485475E+00 | 1.0900004053E+02 | -8.1775942996E+02 |
| 48 | 46 | 2.5095485475E+00 | 1.0950004053E+02 | -8.1775942358E+02 |
| 48 | 47 | 2.5095485475E+00 | 1.1000004053E+02 | -8.1775942167E+02 |
| 48 | 48 | 2.5095485475E+00 | 1.1050004053E+02 | -8.1775942382E+02 |
| 48 | 49 | 2.5095485475E+00 | 1.1100004053E+02 | -8.1775947063E+02 |
| 48 | 50 | 2.5095485475E+00 | 1.1150004053E+02 | -8.1775946590E+02 |
| 48 | 51 | 2.5095485475E+00 | 1.1200004053E+02 | -8.1775946104E+02 |

|    |    |                  |                  |                   |
|----|----|------------------|------------------|-------------------|
| 48 | 52 | 2.5095485475E+00 | 1.1250004053E+02 | -8.1775945504E+02 |
| 48 | 53 | 2.5095485475E+00 | 1.1300004053E+02 | -8.1775944777E+02 |
| 48 | 54 | 2.5095485475E+00 | 1.1350004053E+02 | -8.1775943929E+02 |
| 48 | 55 | 2.5095485475E+00 | 1.1400004053E+02 | -8.1775942951E+02 |
| 48 | 56 | 2.5095485475E+00 | 1.1450004053E+02 | -8.1775941869E+02 |
| 48 | 57 | 2.5095485475E+00 | 1.1500004053E+02 | -8.1775940697E+02 |
| 48 | 58 | 2.5095485475E+00 | 1.1550004053E+02 | -8.1775939500E+02 |
| 48 | 59 | 2.5095485475E+00 | 1.1600004053E+02 | -8.1775938291E+02 |
| 48 | 60 | 2.5095485475E+00 | 1.1650004053E+02 | -8.1775937117E+02 |
| 48 | 61 | 2.5095485475E+00 | 1.1700004053E+02 | -8.1775936002E+02 |
| 49 | 1  | 2.5195485475E+00 | 8.7000040532E+01 | -8.1775509099E+02 |
| 49 | 2  | 2.5195485475E+00 | 8.7500040532E+01 | -8.1775535783E+02 |
| 49 | 3  | 2.5195485475E+00 | 8.8000040532E+01 | -8.1775561606E+02 |
| 49 | 4  | 2.5195485475E+00 | 8.8500040532E+01 | -8.1775587075E+02 |
| 49 | 5  | 2.5195485475E+00 | 8.9000040532E+01 | -8.1775611727E+02 |
| 49 | 6  | 2.5195485475E+00 | 8.9500040532E+01 | -8.1775635340E+02 |
| 49 | 7  | 2.5195485475E+00 | 9.0000040532E+01 | -8.1775657926E+02 |
| 49 | 8  | 2.5195485475E+00 | 9.0500040532E+01 | -8.1775679461E+02 |
| 49 | 9  | 2.5195485475E+00 | 9.1000040532E+01 | -8.1775699806E+02 |
| 49 | 10 | 2.5195485475E+00 | 9.1500040532E+01 | -8.1775719232E+02 |
| 49 | 11 | 2.5195485475E+00 | 9.2000040532E+01 | -8.1775737641E+02 |
| 49 | 12 | 2.5195485475E+00 | 9.2500040532E+01 | -8.1775755345E+02 |
| 49 | 13 | 2.5195485475E+00 | 9.3000040532E+01 | -8.1775772019E+02 |
| 49 | 14 | 2.5195485475E+00 | 9.3500040532E+01 | -8.1775788021E+02 |
| 49 | 15 | 2.5195485475E+00 | 9.4000040532E+01 | -8.1775802997E+02 |
| 49 | 16 | 2.5195485475E+00 | 9.4500040532E+01 | -8.1775817275E+02 |
| 49 | 17 | 2.5195485475E+00 | 9.5000040532E+01 | -8.1775830564E+02 |
| 49 | 18 | 2.5195485475E+00 | 9.5500040532E+01 | -8.1775843173E+02 |
| 49 | 19 | 2.5195485475E+00 | 9.6000040532E+01 | -8.1775854783E+02 |
| 49 | 20 | 2.5195485475E+00 | 9.6500040532E+01 | -8.1775865727E+02 |
| 49 | 21 | 2.5195485475E+00 | 9.7000040532E+01 | -8.1775875848E+02 |
| 49 | 22 | 2.5195485475E+00 | 9.7500040532E+01 | -8.1775885308E+02 |
| 49 | 23 | 2.5195485475E+00 | 9.8000040532E+01 | -8.1775893978E+02 |
| 49 | 24 | 2.5195485475E+00 | 9.8500040532E+01 | -8.1775901947E+02 |
| 49 | 25 | 2.5195485475E+00 | 9.9000040532E+01 | -8.1775909172E+02 |
| 49 | 26 | 2.5195485475E+00 | 9.9500040532E+01 | -8.1775915691E+02 |
| 49 | 27 | 2.5195485475E+00 | 1.0000004053E+02 | -8.1775921551E+02 |
| 49 | 28 | 2.5195485475E+00 | 1.0050004053E+02 | -8.1775926962E+02 |
| 49 | 29 | 2.5195485475E+00 | 1.0100004053E+02 | -8.1775931826E+02 |
| 49 | 30 | 2.5195485475E+00 | 1.0150004053E+02 | -8.1775936262E+02 |
| 49 | 31 | 2.5195485475E+00 | 1.0200004053E+02 | -8.1775940042E+02 |
| 49 | 32 | 2.5195485475E+00 | 1.0250004053E+02 | -8.1775943347E+02 |
| 49 | 33 | 2.5195485475E+00 | 1.0300004053E+02 | -8.1775946053E+02 |
| 49 | 34 | 2.5195485475E+00 | 1.0350004053E+02 | -8.1775948282E+02 |
| 49 | 35 | 2.5195485475E+00 | 1.0400004053E+02 | -8.1775950061E+02 |
| 49 | 36 | 2.5195485475E+00 | 1.0450004053E+02 | -8.1775952351E+02 |
| 49 | 37 | 2.5195485475E+00 | 1.0500004053E+02 | -8.1775955007E+02 |
| 49 | 38 | 2.5195485475E+00 | 1.0550004053E+02 | -8.1775956794E+02 |
| 49 | 39 | 2.5195485475E+00 | 1.0600004053E+02 | -8.1775958062E+02 |
| 49 | 40 | 2.5195485475E+00 | 1.0650004053E+02 | -8.1775958992E+02 |
| 49 | 41 | 2.5195485475E+00 | 1.0700004053E+02 | -8.1775959554E+02 |
| 49 | 42 | 2.5195485475E+00 | 1.0750004053E+02 | -8.1775959808E+02 |



|    |    |                  |                  |                   |
|----|----|------------------|------------------|-------------------|
| 49 | 43 | 2.5195485475E+00 | 1.0800004053E+02 | -8.1775959781E+02 |
| 49 | 44 | 2.5195485475E+00 | 1.0850004053E+02 | -8.1775959567E+02 |
| 49 | 45 | 2.5195485475E+00 | 1.0900004053E+02 | -8.1775959138E+02 |
| 49 | 46 | 2.5195485475E+00 | 1.0950004053E+02 | -8.1775958693E+02 |
| 49 | 47 | 2.5195485475E+00 | 1.1000004053E+02 | -8.1775958949E+02 |
| 49 | 48 | 2.5195485475E+00 | 1.1050004053E+02 | -8.1775959342E+02 |
| 49 | 49 | 2.5195485475E+00 | 1.1100004053E+02 | -8.1775963885E+02 |
| 49 | 50 | 2.5195485475E+00 | 1.1150004053E+02 | -8.1775963652E+02 |
| 49 | 51 | 2.5195485475E+00 | 1.1200004053E+02 | -8.1775963329E+02 |
| 49 | 52 | 2.5195485475E+00 | 1.1250004053E+02 | -8.1775962923E+02 |
| 49 | 53 | 2.5195485475E+00 | 1.1300004053E+02 | -8.1775962360E+02 |
| 49 | 54 | 2.5195485475E+00 | 1.1350004053E+02 | -8.1775961695E+02 |
| 49 | 55 | 2.5195485475E+00 | 1.1400004053E+02 | -8.1775960898E+02 |
| 49 | 56 | 2.5195485475E+00 | 1.1450004053E+02 | -8.1775960020E+02 |
| 49 | 57 | 2.5195485475E+00 | 1.1500004053E+02 | -8.1775959074E+02 |
| 49 | 58 | 2.5195485475E+00 | 1.1550004053E+02 | -8.1775958111E+02 |
| 49 | 59 | 2.5195485475E+00 | 1.1600004053E+02 | -8.1775957154E+02 |
| 49 | 60 | 2.5195485475E+00 | 1.1650004053E+02 | -8.1775956242E+02 |
| 49 | 61 | 2.5195485475E+00 | 1.1700004053E+02 | -8.1775955410E+02 |
| 50 | 1  | 2.5295485475E+00 | 8.7000040532E+01 | -8.1775533365E+02 |
| 50 | 2  | 2.5295485475E+00 | 8.7500040532E+01 | -8.1775560611E+02 |
| 50 | 3  | 2.5295485475E+00 | 8.8000040532E+01 | -8.1775587191E+02 |
| 50 | 4  | 2.5295485475E+00 | 8.8500040532E+01 | -8.1775612874E+02 |
| 50 | 5  | 2.5295485475E+00 | 8.9000040532E+01 | -8.1775637347E+02 |
| 50 | 6  | 2.5295485475E+00 | 8.9500040532E+01 | -8.1775660865E+02 |
| 50 | 7  | 2.5295485475E+00 | 9.0000040532E+01 | -8.1775683038E+02 |
| 50 | 8  | 2.5295485475E+00 | 9.0500040532E+01 | -8.1775704249E+02 |
| 50 | 9  | 2.5295485475E+00 | 9.1000040532E+01 | -8.1775724089E+02 |
| 50 | 10 | 2.5295485475E+00 | 9.1500040532E+01 | -8.1775743000E+02 |
| 50 | 11 | 2.5295485475E+00 | 9.2000040532E+01 | -8.1775760443E+02 |
| 50 | 12 | 2.5295485475E+00 | 9.2500040532E+01 | -8.1775777915E+02 |
| 50 | 13 | 2.5295485475E+00 | 9.3000040532E+01 | -8.1775794130E+02 |
| 50 | 14 | 2.5295485475E+00 | 9.3500040532E+01 | -8.1775809660E+02 |
| 50 | 15 | 2.5295485475E+00 | 9.4000040532E+01 | -8.1775824329E+02 |
| 50 | 16 | 2.5295485475E+00 | 9.4500040532E+01 | -8.1775838223E+02 |
| 50 | 17 | 2.5295485475E+00 | 9.5000040532E+01 | -8.1775851157E+02 |
| 50 | 18 | 2.5295485475E+00 | 9.5500040532E+01 | -8.1775863382E+02 |
| 50 | 19 | 2.5295485475E+00 | 9.6000040532E+01 | -8.1775874711E+02 |
| 50 | 20 | 2.5295485475E+00 | 9.6500040532E+01 | -8.1775885361E+02 |
| 50 | 21 | 2.5295485475E+00 | 9.7000040532E+01 | -8.1775895131E+02 |
| 50 | 22 | 2.5295485475E+00 | 9.7500040532E+01 | -8.1775904234E+02 |
| 50 | 23 | 2.5295485475E+00 | 9.8000040532E+01 | -8.1775912582E+02 |
| 50 | 24 | 2.5295485475E+00 | 9.8500040532E+01 | -8.1775920242E+02 |
| 50 | 25 | 2.5295485475E+00 | 9.9000040532E+01 | -8.1775927069E+02 |
| 50 | 26 | 2.5295485475E+00 | 9.9500040532E+01 | -8.1775933307E+02 |
| 50 | 27 | 2.5295485475E+00 | 1.0000004053E+02 | -8.1775938834E+02 |
| 50 | 28 | 2.5295485475E+00 | 1.0050004053E+02 | -8.1775943952E+02 |
| 50 | 29 | 2.5295485475E+00 | 1.0100004053E+02 | -8.1775948877E+02 |
| 50 | 30 | 2.5295485475E+00 | 1.0150004053E+02 | -8.1775953141E+02 |
| 50 | 31 | 2.5295485475E+00 | 1.0200004053E+02 | -8.1775956984E+02 |
| 50 | 32 | 2.5295485475E+00 | 1.0250004053E+02 | -8.1775960212E+02 |
| 50 | 33 | 2.5295485475E+00 | 1.0300004053E+02 | -8.1775962856E+02 |

|    |    |                  |                  |                   |
|----|----|------------------|------------------|-------------------|
| 50 | 34 | 2.5295485475E+00 | 1.0350004053E+02 | -8.1775965043E+02 |
| 50 | 35 | 2.5295485475E+00 | 1.0400004053E+02 | -8.1775967095E+02 |
| 50 | 36 | 2.5295485475E+00 | 1.0450004053E+02 | -8.1775970231E+02 |
| 50 | 37 | 2.5295485475E+00 | 1.0500004053E+02 | -8.1775972248E+02 |
| 50 | 38 | 2.5295485475E+00 | 1.0550004053E+02 | -8.1775973940E+02 |
| 50 | 39 | 2.5295485475E+00 | 1.0600004053E+02 | -8.1775975193E+02 |
| 50 | 40 | 2.5295485475E+00 | 1.0650004053E+02 | -8.1775976085E+02 |
| 50 | 41 | 2.5295485475E+00 | 1.0700004053E+02 | -8.1775976616E+02 |
| 50 | 42 | 2.5295485475E+00 | 1.0750004053E+02 | -8.1775976922E+02 |
| 50 | 43 | 2.5295485475E+00 | 1.0800004053E+02 | -8.1775976932E+02 |
| 50 | 44 | 2.5295485475E+00 | 1.0850004053E+02 | -8.1775976765E+02 |
| 50 | 45 | 2.5295485475E+00 | 1.0900004053E+02 | -8.1775976451E+02 |
| 50 | 46 | 2.5295485475E+00 | 1.0950004053E+02 | -8.1775976399E+02 |
| 50 | 47 | 2.5295485475E+00 | 1.1000004053E+02 | -8.1775976976E+02 |
| 50 | 48 | 2.5295485475E+00 | 1.1050004053E+02 | -8.1775977444E+02 |
| 50 | 49 | 2.5295485475E+00 | 1.1100004053E+02 | -8.1775981965E+02 |
| 50 | 50 | 2.5295485475E+00 | 1.1150004053E+02 | -8.1775981895E+02 |
| 50 | 51 | 2.5295485475E+00 | 1.1200004053E+02 | -8.1775981737E+02 |
| 50 | 52 | 2.5295485475E+00 | 1.1250004053E+02 | -8.1775981472E+02 |
| 50 | 53 | 2.5295485475E+00 | 1.1300004053E+02 | -8.1775981087E+02 |
| 50 | 54 | 2.5295485475E+00 | 1.1350004053E+02 | -8.1775980583E+02 |
| 50 | 55 | 2.5295485475E+00 | 1.1400004053E+02 | -8.1775979968E+02 |
| 50 | 56 | 2.5295485475E+00 | 1.1450004053E+02 | -8.1775979289E+02 |
| 50 | 57 | 2.5295485475E+00 | 1.1500004053E+02 | -8.1775978549E+02 |
| 50 | 58 | 2.5295485475E+00 | 1.1550004053E+02 | -8.1775977816E+02 |
| 50 | 59 | 2.5295485475E+00 | 1.1600004053E+02 | -8.1775977097E+02 |
| 50 | 60 | 2.5295485475E+00 | 1.1650004053E+02 | -8.1775976437E+02 |
| 50 | 61 | 2.5295485475E+00 | 1.1700004053E+02 | -8.1775975796E+02 |
| 51 | 1  | 2.5395485475E+00 | 8.7000040532E+01 | -8.1775561585E+02 |
| 51 | 2  | 2.5395485475E+00 | 8.7500040532E+01 | -8.1775589058E+02 |
| 51 | 3  | 2.5395485475E+00 | 8.8000040532E+01 | -8.1775615550E+02 |
| 51 | 4  | 2.5395485475E+00 | 8.8500040532E+01 | -8.1775640980E+02 |
| 51 | 5  | 2.5395485475E+00 | 8.9000040532E+01 | -8.1775665227E+02 |
| 51 | 6  | 2.5395485475E+00 | 8.9500040532E+01 | -8.1775688269E+02 |
| 51 | 7  | 2.5395485475E+00 | 9.0000040532E+01 | -8.1775710134E+02 |
| 51 | 8  | 2.5395485475E+00 | 9.0500040532E+01 | -8.1775730806E+02 |
| 51 | 9  | 2.5395485475E+00 | 9.1000040532E+01 | -8.1775750292E+02 |
| 51 | 10 | 2.5395485475E+00 | 9.1500040532E+01 | -8.1775768655E+02 |
| 51 | 11 | 2.5395485475E+00 | 9.2000040532E+01 | -8.1775785982E+02 |
| 51 | 12 | 2.5395485475E+00 | 9.2500040532E+01 | -8.1775802383E+02 |
| 51 | 13 | 2.5395485475E+00 | 9.3000040532E+01 | -8.1775817874E+02 |
| 51 | 14 | 2.5395485475E+00 | 9.3500040532E+01 | -8.1775832962E+02 |
| 51 | 15 | 2.5395485475E+00 | 9.4000040532E+01 | -8.1775847172E+02 |
| 51 | 16 | 2.5395485475E+00 | 9.4500040532E+01 | -8.1775860624E+02 |
| 51 | 17 | 2.5395485475E+00 | 9.5000040532E+01 | -8.1775873224E+02 |
| 51 | 18 | 2.5395485475E+00 | 9.5500040532E+01 | -8.1775885088E+02 |
| 51 | 19 | 2.5395485475E+00 | 9.6000040532E+01 | -8.1775896028E+02 |
| 51 | 20 | 2.5395485475E+00 | 9.6500040532E+01 | -8.1775906209E+02 |
| 51 | 21 | 2.5395485475E+00 | 9.7000040532E+01 | -8.1775915718E+02 |
| 51 | 22 | 2.5395485475E+00 | 9.7500040532E+01 | -8.1775924509E+02 |
| 51 | 23 | 2.5395485475E+00 | 9.8000040532E+01 | -8.1775932475E+02 |
| 51 | 24 | 2.5395485475E+00 | 9.8500040532E+01 | -8.1775939733E+02 |

|    |    |                  |                  |                   |
|----|----|------------------|------------------|-------------------|
| 51 | 25 | 2.5395485475E+00 | 9.9000040532E+01 | -8.1775946277E+02 |
| 51 | 26 | 2.5395485475E+00 | 9.9500040532E+01 | -8.1775952128E+02 |
| 51 | 27 | 2.5395485475E+00 | 1.0000004053E+02 | -8.1775957312E+02 |
| 51 | 28 | 2.5395485475E+00 | 1.0050004053E+02 | -8.1775962638E+02 |
| 51 | 29 | 2.5395485475E+00 | 1.0100004053E+02 | -8.1775967445E+02 |
| 51 | 30 | 2.5395485475E+00 | 1.0150004053E+02 | -8.1775971763E+02 |
| 51 | 31 | 2.5395485475E+00 | 1.0200004053E+02 | -8.1775975284E+02 |
| 51 | 32 | 2.5395485475E+00 | 1.0250004053E+02 | -8.1775978469E+02 |
| 51 | 33 | 2.5395485475E+00 | 1.0300004053E+02 | -8.1775981111E+02 |
| 51 | 34 | 2.5395485475E+00 | 1.0350004053E+02 | -8.1775983450E+02 |
| 51 | 35 | 2.5395485475E+00 | 1.0400004053E+02 | -8.1775985985E+02 |
| 51 | 36 | 2.5395485475E+00 | 1.0450004053E+02 | -8.1775988777E+02 |
| 51 | 37 | 2.5395485475E+00 | 1.0500004053E+02 | -8.1775990586E+02 |
| 51 | 38 | 2.5395485475E+00 | 1.0550004053E+02 | -8.1775992203E+02 |
| 51 | 39 | 2.5395485475E+00 | 1.0600004053E+02 | -8.1775993407E+02 |
| 51 | 40 | 2.5395485475E+00 | 1.0650004053E+02 | -8.1775994265E+02 |
| 51 | 41 | 2.5395485475E+00 | 1.0700004053E+02 | -8.1775994827E+02 |
| 51 | 42 | 2.5395485475E+00 | 1.0750004053E+02 | -8.1775995116E+02 |
| 51 | 43 | 2.5395485475E+00 | 1.0800004053E+02 | -8.1775995158E+02 |
| 51 | 44 | 2.5395485475E+00 | 1.0850004053E+02 | -8.1775995054E+02 |
| 51 | 45 | 2.5395485475E+00 | 1.0900004053E+02 | -8.1775994899E+02 |
| 51 | 46 | 2.5395485475E+00 | 1.0950004053E+02 | -8.1775995339E+02 |
| 51 | 47 | 2.5395485475E+00 | 1.1000004053E+02 | -8.1775996114E+02 |
| 51 | 48 | 2.5395485475E+00 | 1.1050004053E+02 | -8.1775996686E+02 |
| 51 | 49 | 2.5395485475E+00 | 1.1100004053E+02 | -8.1776001121E+02 |
| 51 | 50 | 2.5395485475E+00 | 1.1150004053E+02 | -8.1776001204E+02 |
| 51 | 51 | 2.5395485475E+00 | 1.1200004053E+02 | -8.1776001200E+02 |
| 51 | 52 | 2.5395485475E+00 | 1.1250004053E+02 | -8.1776001082E+02 |
| 51 | 53 | 2.5395485475E+00 | 1.1300004053E+02 | -8.1776000846E+02 |
| 51 | 54 | 2.5395485475E+00 | 1.1350004053E+02 | -8.1776000512E+02 |
| 51 | 55 | 2.5395485475E+00 | 1.1400004053E+02 | -8.1776000081E+02 |
| 51 | 56 | 2.5395485475E+00 | 1.1450004053E+02 | -8.1775999590E+02 |
| 51 | 57 | 2.5395485475E+00 | 1.1500004053E+02 | -8.1775999054E+02 |
| 51 | 58 | 2.5395485475E+00 | 1.1550004053E+02 | -8.1775998541E+02 |
| 51 | 59 | 2.5395485475E+00 | 1.1600004053E+02 | -8.1775998032E+02 |
| 51 | 60 | 2.5395485475E+00 | 1.1650004053E+02 | -8.1775997610E+02 |
| 51 | 61 | 2.5395485475E+00 | 1.1700004053E+02 | -8.1775997234E+02 |

---

**Total grid point: 3111**

**Labeled Contour Plot of Potential energy surface (B3PW91)**



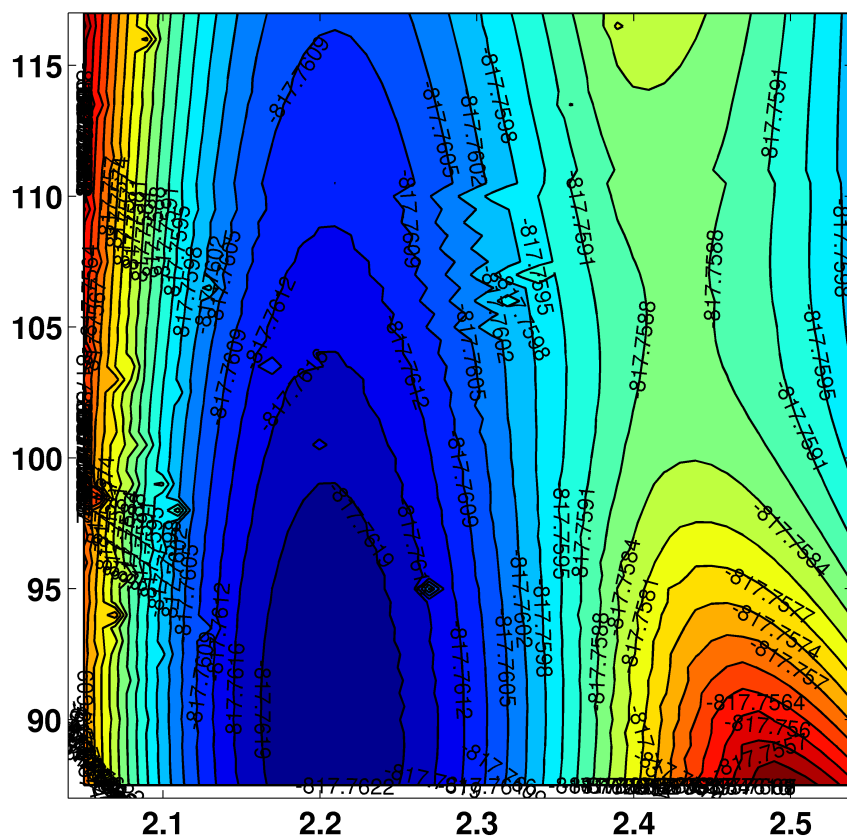

**Born-Oppenhemer Molecular Dynamics (BOMD) plot data**

| <u>Simulation Time(pico sec)</u> | <u>C-I bond length (in Angstrom)</u> |
|----------------------------------|--------------------------------------|
| 2.499999944120646E-003           | 2.09878132727019                     |
| 4.999999888241291E-003           | 3.05358535214344                     |
| 7.499999832361937E-003           | 2.09224613946686                     |
| 9.999999776482582E-003           | 3.07475039453303                     |
| 1.249999972060323E-002           | 2.09182023000329                     |

|                        |                  |
|------------------------|------------------|
| 1.499999966472387E-002 | 3.07109069520163 |
| 1.749999960884452E-002 | 2.10501383421345 |
| 1.999999955296516E-002 | 3.09706156487016 |
| 2.249999949708581E-002 | 2.13611254845947 |
| 2.499999944120646E-002 | 3.11498125587137 |
| 2.749999938532710E-002 | 2.17157091510386 |
| 2.999999932944775E-002 | 3.14194427797232 |
| 3.249999927356839E-002 | 2.19797171992749 |
| 3.499999921768904E-002 | 3.12966488274384 |
| 3.749999916180968E-002 | 2.19711893243902 |
| 3.999999910593033E-002 | 3.13551927573552 |
| 4.249999905005097E-002 | 2.18494292543718 |
| 4.499999899417162E-002 | 3.13321661496217 |
| 4.749999893829226E-002 | 2.17860366663007 |
| 4.999999888241291E-002 | 3.13063732027170 |
| 5.249999882653356E-002 | 2.18460608692505 |
| 5.499999877065420E-002 | 3.09736536536037 |
| 5.749999871477485E-002 | 2.16588185877023 |
| 5.999999865889549E-002 | 3.06633901302873 |
| 6.249999860301614E-002 | 2.11834423005563 |
| 6.499999854713678E-002 | 3.05376021986812 |
| 6.749999849125743E-002 | 2.07413632053874 |
| 6.999999843537807E-002 | 3.04061276767644 |
| 7.249999837949872E-002 | 2.07150844302552 |
| 7.499999832361937E-002 | 3.02072476264985 |
| 7.749999826774001E-002 | 2.08822657710316 |
| 7.999999821186066E-002 | 2.99155716683168 |
| 8.249999815598130E-002 | 2.09726586518996 |
| 8.499999810010195E-002 | 2.99757660653218 |
| 8.749999804422259E-002 | 2.09862113207077 |
| 8.999999798834324E-002 | 3.00216625728040 |
| 9.249999793246388E-002 | 2.11626162690864 |
| 9.499999787658453E-002 | 3.01721061108203 |
| 9.749999782070518E-002 | 2.14220759749610 |
| 9.999999776482582E-002 | 3.02027064443255 |
| 0.102499997708946      | 2.16348437723964 |
| 0.104999997653067      | 3.05269009392994 |
| 0.107499997597188      | 2.16924917706957 |
| 0.109999997541308      | 3.07576748774188 |
| 0.112499997485429      | 2.17238884067033 |
| 0.114999997429550      | 3.09587362305198 |
| 0.117499997373670      | 2.17128214429747 |
| 0.119999997317791      | 3.09803014217970 |
| 0.122499997261912      | 2.16242199261037 |
| 0.124999997206032      | 3.12038326924690 |
| 0.127499997150153      | 2.14435101903723 |
| 0.129999997094274      | 3.14447060817302 |
| 0.132499997038394      | 2.13725381647150 |
| 0.134999996982515      | 3.14965216723149 |
| 0.137499996926636      | 2.14078569811063 |
| 0.139999996870756      | 3.13362063701703 |
| 0.142499996814877      | 2.14044491864776 |

|                   |                  |
|-------------------|------------------|
| 0.144999996758997 | 3.12880589668295 |
| 0.147499996703118 | 2.13462801567744 |
| 0.149999996647239 | 3.14273525892351 |
| 0.152499996591359 | 2.14167426716459 |
| 0.154999996535480 | 3.13810535942517 |
| 0.157499996479601 | 2.16135703436707 |
| 0.159999996423721 | 3.10915678759965 |
| 0.162499996367842 | 2.16903289840933 |
| 0.164999996311963 | 3.09440307552943 |
| 0.167499996256083 | 2.16868366416151 |
| 0.169999996200204 | 3.09821144743560 |
| 0.172499996144325 | 2.17066740565523 |
| 0.174999996088445 | 3.08885393446744 |
| 0.177499996032566 | 2.17777482180344 |
| 0.179999995976686 | 3.05403151941004 |
| 0.182499995920807 | 2.16382372371180 |
| 0.184999995864928 | 3.03236964124593 |
| 0.187499995809048 | 2.14150508801567 |
| 0.189999995753169 | 3.03866788649023 |
| 0.192499995697290 | 2.12823038057302 |
| 0.194999995641410 | 3.03989230522300 |
| 0.197499995585531 | 2.13320876366051 |
| 0.199999995529652 | 3.02395103620512 |
| 0.202499995473772 | 2.12288576992122 |
| 0.204999995417893 | 3.01733548386420 |
| 0.207499995362014 | 2.09676831883377 |
| 0.209999995306134 | 3.04403395594152 |
| 0.212499995250255 | 2.08999182656201 |
| 0.214999995194376 | 3.06042234787472 |
| 0.217499995138496 | 2.12679813233932 |
| 0.219999995082617 | 3.05894910802942 |
| 0.222499995026737 | 2.16288840220895 |
| 0.224999994970858 | 3.06552470571304 |
| 0.227499994914979 | 2.16410079710743 |
| 0.229999994859099 | 3.11075862496996 |
| 0.232499994803220 | 2.15022524705878 |
| 0.234999994747341 | 3.14399745995365 |
| 0.237499994691461 | 2.16691354790195 |
| 0.239999994635582 | 3.15288574525132 |
| 0.242499994579703 | 2.20269605773720 |
| 0.244999994523823 | 3.13689129086489 |
| 0.247499994467944 | 2.22103944449980 |
| 0.249999994412065 | 3.15121118332840 |
| 0.252499994356185 | 2.20690949597259 |
| 0.254999994300306 | 3.15747707758837 |
| 0.257499994244426 | 2.18366670969290 |
| 0.259999994188547 | 3.14803999926145 |
| 0.262499994132668 | 2.16476202403728 |
| 0.264999994076788 | 3.11665894623104 |
| 0.267499994020909 | 2.15056681083546 |
| 0.269999993965030 | 3.11169071286913 |
| 0.272499993909150 | 2.14076606720562 |

|                   |                  |
|-------------------|------------------|
| 0.274999993853271 | 3.09471693698228 |
| 0.277499993797392 | 2.12872426095890 |
| 0.279999993741512 | 3.06763529504112 |
| 0.282499993685633 | 2.10873178937365 |
| 0.284999993629754 | 3.02109544340261 |
| 0.287499993573874 | 2.08529750000090 |
| 0.289999993517995 | 3.01199447190827 |
| 0.292499993462116 | 2.08582499819544 |
| 0.294999993406236 | 3.01089529429686 |
| 0.297499993350357 | 2.10868922816450 |
| 0.299999993294477 | 3.00912395475843 |
| 0.302499993238598 | 2.13528925204011 |
| 0.304999993182719 | 2.99850814402996 |
| 0.307499993126839 | 2.13609039588427 |
| 0.309999993070960 | 3.00285872754614 |
| 0.312499993015081 | 2.13150165464444 |
| 0.314999992959201 | 3.02952739410589 |
| 0.317499992903322 | 2.14464331228552 |
| 0.319999992847443 | 3.03384989370898 |
| 0.322499992791563 | 2.17718626575013 |
| 0.324999992735684 | 3.04158213334459 |
| 0.327499992679805 | 2.18414555804919 |
| 0.329999992623925 | 3.04374347553288 |
| 0.332499992568046 | 2.15547536852222 |
| 0.334999992512167 | 3.08795861681646 |
| 0.337499992456287 | 2.12246291569535 |
| 0.339999992400408 | 3.10305366414617 |
| 0.342499992344528 | 2.12160343891737 |
| 0.344999992288649 | 3.11841259649938 |
| 0.347499992232770 | 2.13731873357719 |
| 0.349999992176890 | 3.10337178198746 |
| 0.352499992121011 | 2.13798317811764 |
| 0.354999992065132 | 3.12884455748220 |
| 0.357499992009252 | 2.12617312122837 |
| 0.359999991953373 | 3.13551981519508 |
| 0.362499991897494 | 2.12965556770174 |
| 0.364999991841614 | 3.13822841067074 |
| 0.367499991785735 | 2.14612520854982 |
| 0.369999991729856 | 3.12769394339680 |
| 0.372499991673976 | 2.16071099029232 |
| 0.374999991618097 | 3.14197888187699 |
| 0.377499991562217 | 2.16938701022685 |
| 0.379999991506338 | 3.14375473258904 |
| 0.382499991450459 | 2.18252500848581 |
| 0.384999991394579 | 3.11620689264705 |
| 0.387499991338700 | 2.18807702346193 |
| 0.389999991282821 | 3.08488114807605 |
| 0.392499991226941 | 2.17853923143032 |
| 0.394999991171062 | 3.06542241735083 |
| 0.397499991115183 | 2.15627524171521 |
| 0.399999991059303 | 3.06847973689171 |
| 0.402499991003424 | 2.13856446840281 |

|                   |                  |
|-------------------|------------------|
| 0.404999990947545 | 3.03973962446967 |
| 0.407499990891665 | 2.12273595958306 |
| 0.409999990835786 | 3.01570118024084 |
| 0.412499990779907 | 2.09893181468622 |
| 0.414999990724027 | 2.99708266970833 |
| 0.417499990668148 | 2.07865670888678 |
| 0.419999990612268 | 3.01504679666834 |
| 0.422499990556389 | 2.08118260023334 |
| 0.424999990500510 | 3.00900208688562 |
| 0.427499990444630 | 2.10317220876561 |
| 0.429999990388751 | 3.00701548269326 |
| 0.432499990332872 | 2.11614585685770 |
| 0.434999990276992 | 3.01640319048598 |
| 0.437499990221113 | 2.12867198114059 |
| 0.439999990165234 | 3.06441600962826 |
| 0.442499990109354 | 2.15227209301845 |
| 0.444999990053475 | 3.09233843101366 |
| 0.447499989997596 | 2.18761641672232 |
| 0.449999989941716 | 3.10571892629806 |
| 0.452499989885837 | 2.20185179061035 |
| 0.454999989829957 | 3.11063600334031 |
| 0.457499989774078 | 2.19527264310085 |
| 0.459999989718199 | 3.14353889217710 |
| 0.462499989662319 | 2.19193461258884 |
| 0.464999989606440 | 3.15981768739353 |
| 0.467499989550561 | 2.20524949009358 |
| 0.469999989494681 | 3.15162323883836 |
| 0.472499989438802 | 2.19918277089673 |
| 0.474999989382923 | 3.14384534030000 |
| 0.477499989327043 | 2.15716115959355 |
| 0.479999989271164 | 3.16388286746349 |
| 0.482499989215285 | 2.12040479777730 |
| 0.484999989159405 | 3.16832569561433 |
| 0.487499989103526 | 2.13080035203160 |
| 0.489999989047647 | 3.13496733703208 |
| 0.492499988991767 | 2.15731778692640 |
| 0.494999988935888 | 3.10157152087938 |
| 0.497499988880008 | 2.15817709839948 |
| 0.499999988824129 | 3.09883007528422 |
| 0.502499988768250 | 2.13741504645541 |
| 0.504999988712370 | 3.10160801683997 |
| 0.507499988656491 | 2.13780612970540 |
| 0.509999988600612 | 3.07914009348519 |
| 0.512499988544732 | 2.15985399705304 |
| 0.514999988488853 | 3.05360990888325 |
| 0.517499988432974 | 2.18244671086329 |
| 0.519999988377094 | 3.03982496815672 |
| 0.522499988321215 | 2.18744401301428 |
| 0.524999988265336 | 3.03838755796080 |
| 0.527499988209456 | 2.17890478178327 |
| 0.529999988153577 | 3.01212298096044 |
| 0.532499988097697 | 2.16010872112355 |

|                   |                  |
|-------------------|------------------|
| 0.534999988041818 | 2.99371880654780 |
| 0.537499987985939 | 2.14077734101074 |
| 0.539999987930059 | 2.99899346531132 |
| 0.542499987874180 | 2.13206467263519 |
| 0.544999987818301 | 3.02172046045858 |
| 0.547499987762421 | 2.12981092840468 |
| 0.549999987706542 | 3.02724810440935 |
| 0.552499987650663 | 2.12167492594554 |
| 0.554999987594783 | 3.03033565503328 |
| 0.557499987538904 | 2.10252093845698 |
| 0.559999987483025 | 3.04822515387725 |
| 0.562499987427145 | 2.10442074550267 |
| 0.564999987371266 | 3.08014639258737 |
| 0.567499987315387 | 2.13979956059277 |
| 0.569999987259507 | 3.09564491901268 |
| 0.572499987203628 | 2.18739759720701 |
| 0.574999987147748 | 3.10790308855296 |
| 0.577499987091869 | 2.19902254198655 |
| 0.579999987035990 | 3.12801011542242 |
| 0.582499986980110 | 2.18672823558507 |
| 0.584999986924231 | 3.16963409068618 |
| 0.587499986868352 | 2.19024291426568 |
| 0.589999986812472 | 3.17543069617383 |
| 0.592499986756593 | 2.22190078485089 |
| 0.594999986700714 | 3.16285663003131 |
| 0.597499986644834 | 2.23974839897119 |
| 0.599999986588955 | 3.14080910203120 |
| 0.602499986533076 | 2.21875473045175 |
| 0.604999986477196 | 3.14264914693909 |
| 0.607499986421317 | 2.17606885534305 |
| 0.609999986365438 | 3.12913725913582 |
| 0.612499986309558 | 2.14442147199215 |
| 0.614999986253679 | 3.11172602414946 |
| 0.617499986197799 | 2.12640993510494 |
| 0.619999986141920 | 3.08467677289745 |
| 0.622499986086041 | 2.11061075223026 |
| 0.624999986030161 | 3.06825554173475 |
| 0.627499985974282 | 2.09421495668902 |
| 0.629999985918403 | 3.05125766688639 |
| 0.632499985862523 | 2.09126130937886 |
| 0.634999985806644 | 3.01763034882356 |
| 0.637499985750765 | 2.09810545206336 |
| 0.639999985694885 | 2.99902689048215 |
| 0.642499985639006 | 2.11019450675690 |
| 0.644999985583127 | 3.00162370822610 |
| 0.647499985527247 | 2.12431947994387 |
| 0.649999985471368 | 3.02921120873273 |
| 0.652499985415488 | 2.14903634219061 |
| 0.654999985359609 | 3.01649007404848 |
| 0.657499985303730 | 2.16726359304723 |
| 0.659999985247850 | 3.01936940604640 |
| 0.662499985191971 | 2.16762586482100 |



|                   |                  |
|-------------------|------------------|
| 0.664999985136092 | 3.02418259700336 |
| 0.667499985080212 | 2.15881174830299 |
| 0.669999985024333 | 3.06042998954036 |
| 0.672499984968454 | 2.15820869216881 |
| 0.674999984912574 | 3.05806799067876 |
| 0.677499984856695 | 2.15553746261901 |
| 0.679999984800816 | 3.06180749050704 |
| 0.682499984744936 | 2.13115611670802 |
| 0.684999984689057 | 3.07948597804910 |
| 0.687499984633178 | 2.10727836107264 |
| 0.689999984577298 | 3.11964789963018 |
| 0.692499984521419 | 2.10936105759967 |
| 0.694999984465539 | 3.12680308728356 |
| 0.697499984409660 | 2.13209229484045 |
| 0.699999984353781 | 3.11404815858072 |
| 0.702499984297901 | 2.13695468619248 |
| 0.704999984242022 | 3.11855673857411 |
| 0.707499984186143 | 2.13794314919878 |
| 0.709999984130263 | 3.13865739071279 |
| 0.712499984074384 | 2.15363026714847 |
| 0.714999984018505 | 3.14531554700796 |
| 0.717499983962625 | 2.18154934762636 |
| 0.719999983906746 | 3.12285143979681 |
| 0.722499983850867 | 2.18436369309440 |
| 0.724999983794987 | 3.11719800360163 |
| 0.727499983739108 | 2.16398725743892 |
| 0.729999983683228 | 3.11357883709069 |
| 0.732499983627349 | 2.15149292336601 |
| 0.734999983571470 | 3.10540142011303 |
| 0.737499983515590 | 2.16259531343916 |
| 0.739999983459711 | 3.05425017542653 |
| 0.742499983403832 | 2.15888340201156 |
| 0.744999983347952 | 3.02910210565474 |
| 0.747499983292073 | 2.11704517850376 |
| 0.749999983236194 | 3.02613751915028 |
| 0.752499983180314 | 2.07079428385922 |
| 0.754999983124435 | 3.03717377908608 |
| 0.757499983068556 | 2.07082702898456 |
| 0.759999983012676 | 3.00446797761950 |
| 0.762499982956797 | 2.09849835398482 |
| 0.764999982900918 | 2.99153740176485 |
| 0.767499982845038 | 2.11399081547106 |
| 0.769999982789159 | 3.00633178343991 |
| 0.772499982733279 | 2.11435301284104 |
| 0.774999982677400 | 3.03580116954635 |
| 0.777499982621521 | 2.12524565560478 |
| 0.779999982565641 | 3.03199283383273 |
| 0.782499982509762 | 2.14482470658327 |
| 0.784999982453883 | 3.04134627475728 |
| 0.787499982398003 | 2.16118230237132 |
| 0.789999982342124 | 3.07588649570315 |
| 0.792499982286245 | 2.17494369758622 |



|                   |                  |
|-------------------|------------------|
| 0.794999982230365 | 3.10763289145259 |
| 0.797499982174486 | 2.17970703909516 |
| 0.799999982118607 | 3.11084220898730 |
| 0.802499982062727 | 2.16607990506560 |
| 0.804999982006848 | 3.10001593697258 |
| 0.807499981950969 | 2.13766444220462 |
| 0.809999981895089 | 3.12506312777662 |
| 0.812499981839210 | 2.13174795759020 |
| 0.814999981783330 | 3.13480535989174 |
| 0.817499981727451 | 2.14468468074657 |
| 0.819999981671572 | 3.13425721606524 |
| 0.822499981615692 | 2.14834811544801 |
| 0.824999981559813 | 3.10939396566614 |
| 0.827499981503934 | 2.11714985161419 |
| 0.829999981448054 | 3.12171357435800 |
| 0.832499981392175 | 2.09820283719616 |
| 0.834999981336296 | 3.12305264965770 |
| 0.837499981280416 | 2.12090709163249 |
| 0.839999981224537 | 3.10767548055761 |
| 0.842499981168658 | 2.16828854501863 |
| 0.844999981112778 | 3.06718149364624 |
| 0.847499981056899 | 2.17699303060575 |
| 0.849999981001019 | 3.05713106646755 |
| 0.852499980945140 | 2.14658816411928 |
| 0.854999980889261 | 3.06533402423994 |
| 0.857499980833381 | 2.12340014212230 |
| 0.859999980777502 | 3.05998967633242 |
| 0.862499980721623 | 2.13546056859147 |
| 0.864999980665743 | 3.02816358936782 |
| 0.867499980609864 | 2.14928896746436 |
| 0.869999980553985 | 3.00631674511004 |
| 0.872499980498105 | 2.13197397755038 |
| 0.874999980442226 | 3.01662253816582 |
| 0.877499980386347 | 2.10151210358780 |
| 0.879999980330467 | 3.01496511436965 |
| 0.882499980274588 | 2.08680081347166 |
| 0.884999980218709 | 3.00694899905585 |
| 0.887499980162829 | 2.08981623084471 |
| 0.889999980106950 | 3.01179785289667 |
| 0.892499980051070 | 2.09539415665812 |
| 0.894999979995191 | 3.05182911383354 |
| 0.897499979939312 | 2.11113917439472 |
| 0.899999979883432 | 3.07996972883339 |
| 0.902499979827553 | 2.13472302200496 |
| 0.904999979771674 | 3.07756679128658 |
| 0.907499979715794 | 2.15239623235523 |
| 0.909999979659915 | 3.08142680583622 |
| 0.912499979604036 | 2.15851013423380 |
| 0.914999979548156 | 3.11682428933763 |
| 0.917499979492277 | 2.17226922728952 |
| 0.919999979436398 | 3.15327820061535 |
| 0.922499979380518 | 2.19504495183971 |

|                   |                  |
|-------------------|------------------|
| 0.924999979324639 | 3.14602806572621 |
| 0.927499979268759 | 2.20111863386643 |
| 0.929999979212880 | 3.12853810780722 |
| 0.932499979157001 | 2.17193931429241 |
| 0.934999979101121 | 3.13912847452235 |
| 0.937499979045242 | 2.14238646238931 |
| 0.939999978989363 | 3.15435393324085 |
| 0.942499978933483 | 2.14233434995077 |
| 0.944999978877604 | 3.12856230429666 |
| 0.947499978821725 | 2.15504441066304 |
| 0.949999978765845 | 3.07489852355716 |
| 0.952499978709966 | 2.12823102627323 |
| 0.954999978654087 | 3.06560663121820 |
| 0.957499978598207 | 2.08748264561553 |
| 0.959999978542328 | 3.08097149774937 |
| 0.962499978486449 | 2.07995757108192 |
| 0.964999978430569 | 3.06995109332787 |
| 0.967499978374690 | 2.11203856367468 |
| 0.969999978318810 | 3.01839469391032 |
| 0.972499978262931 | 2.12643248964292 |
| 0.974999978207052 | 3.00819170894243 |
| 0.977499978151172 | 2.12006096178883 |
| 0.979999978095293 | 3.02492584537440 |
| 0.982499978039414 | 2.12729820340967 |
| 0.984999977983534 | 3.03111544749190 |
| 0.987499977927655 | 2.15079439744714 |
| 0.989999977871776 | 3.00324084936856 |
| 0.992499977815896 | 2.15616575056117 |
| 0.994999977760017 | 3.01167923359145 |
| 0.997499977704138 | 2.12905909627023 |
| 0.999999977648258 | 3.04705599308365 |
| 1.00249997759238  | 2.11673942678569 |
| 1.00499997753650  | 3.06998446919687 |
| 1.00749997748062  | 2.13337651701733 |
| 1.00999997742474  | 3.04767649807932 |
| 1.01249997736886  | 2.14857478681707 |
| 1.01499997731298  | 3.04787945979020 |
| 1.01749997725710  | 2.12420797796214 |
| 1.01999997720122  | 3.09162298096566 |
| 1.02249997714534  | 2.09818748091394 |
| 1.02499997708946  | 3.13428737886110 |
| 1.02749997703359  | 2.11242751423499 |
| 1.02999997697771  | 3.12427102221974 |
| 1.03249997692183  | 2.15188412275847 |
| 1.03499997686595  | 3.11003645624645 |
| 1.03749997681007  | 2.16884170930822 |
| 1.03999997675419  | 3.13465118964407 |
| 1.04249997669831  | 2.16797301120978 |
| 1.04499997664243  | 3.16064050299524 |
| 1.04749997658655  | 2.17636300156201 |
| 1.04999997653067  | 3.14561103101226 |
| 1.05249997647479  | 2.19322543002515 |

|                  |                  |
|------------------|------------------|
| 1.05499997641891 | 3.10398603580139 |
| 1.05749997636303 | 2.19022618029143 |
| 1.05999997630715 | 3.11223137046991 |
| 1.06249997625127 | 2.17588823243980 |
| 1.06499997619539 | 3.11298993692222 |
| 1.06749997613952 | 2.16271479471358 |
| 1.06999997608364 | 3.09844025862723 |
| 1.07249997602776 | 2.14762397967195 |
| 1.07499997597188 | 3.03390766574891 |
| 1.07749997591600 | 2.11075332618689 |
| 1.07999997586012 | 3.02750780782825 |
| 1.08249997580424 | 2.08274298900104 |
| 1.08499997574836 | 3.02373088637068 |
| 1.08749997569248 | 2.08838519409375 |
| 1.08999997563660 | 3.02301238367460 |
| 1.09249997558072 | 2.10771771706270 |
| 1.09499997552484 | 2.99005351788910 |
| 1.09749997546896 | 2.10105004583851 |
| 1.09999997541308 | 3.00241298669337 |
| 1.10249997535720 | 2.08802571460626 |
| 1.10499997530133 | 3.03511843138419 |
| 1.10749997524545 | 2.11869279193894 |
| 1.10999997518957 | 3.04938678287816 |
| 1.11249997513369 | 2.17902441111751 |
| 1.11499997507781 | 3.04296740682200 |
| 1.11749997502193 | 2.21883441004393 |
| 1.11999997496605 | 3.04619837951930 |
| 1.12249997491017 | 2.20255588027319 |
| 1.12499997485429 | 3.09989868974423 |
| 1.12749997479841 | 2.17770847869590 |
| 1.12999997474253 | 3.12819607864565 |
| 1.13249997468665 | 2.17769844625214 |
| 1.13499997463077 | 3.13963273011192 |
| 1.13749997457489 | 2.19929358635313 |
| 1.13999997451901 | 3.11707239240236 |
| 1.14249997446314 | 2.18810338057917 |
| 1.14499997440726 | 3.14856012470272 |
| 1.14749997435138 | 2.15349422191679 |
| 1.14999997429550 | 3.15928320839791 |
| 1.15249997423962 | 2.12846500133805 |
| 1.15499997418374 | 3.14832792631851 |
| 1.15749997412786 | 2.12909956612860 |
| 1.15999997407198 | 3.11863202202793 |
| 1.16249997401610 | 2.12987155666932 |
| 1.16499997396022 | 3.13407036349106 |
| 1.16749997390434 | 2.13468182199994 |
| 1.16999997384846 | 3.14959446616735 |
| 1.17249997379258 | 2.15403767952490 |
| 1.17499997373670 | 3.12372073006855 |
| 1.17749997368082 | 2.17203469669570 |
| 1.17999997362494 | 3.07970198751535 |
| 1.18249997356907 | 2.17242946797589 |

|                  |                  |
|------------------|------------------|
| 1.18499997351319 | 3.07387617347040 |
| 1.18749997345731 | 2.17480782493121 |
| 1.18999997340143 | 3.08854885838916 |
| 1.19249997334555 | 2.19633580954166 |
| 1.19499997328967 | 3.06600431644086 |
| 1.19749997323379 | 2.20791906739128 |
| 1.19999997317791 | 3.02391845066860 |
| 1.20249997312203 | 2.17857096178045 |
| 1.20499997306615 | 3.01987523977796 |
| 1.20749997301027 | 2.13094213095194 |
| 1.20999997295439 | 3.05183749530492 |
| 1.21249997289851 | 2.11588906205666 |
| 1.21499997284263 | 3.04792632923928 |
| 1.21749997278675 | 2.12962384826875 |
| 1.21999997273088 | 3.01753242355223 |
| 1.22249997267500 | 2.12641494163298 |
| 1.22499997261912 | 3.01454221339178 |
| 1.22749997256324 | 2.09626312009108 |
| 1.22999997250736 | 3.06908582262113 |
| 1.23249997245148 | 2.09745877917374 |
| 1.23499997239560 | 3.10007360035290 |
| 1.23749997233972 | 2.13847881599865 |
| 1.23999997228384 | 3.09899023638701 |
| 1.24249997222796 | 2.17912032799774 |
| 1.24499997217208 | 3.10446575190805 |
| 1.24749997211620 | 2.18200342152321 |
| 1.24999997206032 | 3.15741768712646 |
| 1.25249997200444 | 2.19839135146816 |
| 1.25499997194856 | 3.18313875619553 |
| 1.25749997189268 | 2.23509744840510 |
| 1.25999997183681 | 3.16734543446022 |
| 1.26249997178093 | 2.26293180858328 |
| 1.26499997172505 | 3.15184740442094 |
| 1.26749997166917 | 2.23962453169164 |
| 1.26999997161329 | 3.18337901012760 |
| 1.27249997155741 | 2.20884985776716 |
| 1.27499997150153 | 3.20149869798037 |
| 1.27749997144565 | 2.20628949711365 |
| 1.27999997138977 | 3.16681628731017 |
| 1.28249997133389 | 2.21327827907292 |
| 1.28499997127801 | 3.11721094703166 |
| 1.28749997122213 | 2.18785311724439 |
| 1.28999997116625 | 3.10649824885883 |
| 1.29249997111037 | 2.13917768980653 |
| 1.29499997105449 | 3.11276640039837 |
| 1.29749997099862 | 2.11548081288250 |
| 1.29999997094274 | 3.07908910336304 |
| 1.30249997088686 | 2.11897935435223 |
| 1.30499997083098 | 3.02622780846436 |
| 1.30749997077510 | 2.12413255932345 |
| 1.30999997071922 | 3.01494966559211 |
| 1.31249997066334 | 2.11579137906576 |

|                  |                  |
|------------------|------------------|
| 1.31499997060746 | 3.03034568027643 |
| 1.31749997055158 | 2.11937591101720 |
| 1.31999997049570 | 3.02750257220138 |
| 1.32249997043982 | 2.13561637469490 |
| 1.32499997038394 | 2.99518121928507 |
| 1.32749997032806 | 2.15382353536356 |
| 1.32999997027218 | 2.99964760380015 |
| 1.33249997021630 | 2.16157090241010 |
| 1.33499997016042 | 3.02987597884930 |
| 1.33749997010455 | 2.17800277300283 |
| 1.33999997004867 | 3.05638535252216 |
| 1.34249996999279 | 2.18700614435008 |
| 1.34499996993691 | 3.05212437885909 |
| 1.34749996988103 | 2.17318103388236 |
| 1.34999996982515 | 3.06447512861991 |
| 1.35249996976927 | 2.14123031033609 |
| 1.35499996971339 | 3.10353837545309 |
| 1.35749996965751 | 2.14335730067784 |
| 1.35999996960163 | 3.12445627949872 |
| 1.36249996954575 | 2.16814313060047 |
| 1.36499996948987 | 3.12108335809699 |
| 1.36749996943399 | 2.17499166767163 |
| 1.36999996937811 | 3.11297841331256 |
| 1.37249996932223 | 2.13775529568962 |
| 1.37499996926636 | 3.14908032452524 |
| 1.37749996921048 | 2.11881789616711 |
| 1.37999996915460 | 3.16380520019122 |
| 1.38249996909872 | 2.14342961998709 |
| 1.38499996904284 | 3.15833758134465 |
| 1.38749996898696 | 2.18678632331785 |
| 1.38999996893108 | 3.12441896812927 |
| 1.39249996887520 | 2.19238766469847 |
| 1.39499996881932 | 3.12926465578305 |
| 1.39749996876344 | 2.17204469407423 |
| 1.39999996870756 | 3.12672420272815 |
| 1.40249996865168 | 2.16181669857414 |
| 1.40499996859580 | 3.10730918113502 |
| 1.40749996853992 | 2.17033394299495 |
| 1.40999996848404 | 3.06618802748380 |
| 1.41249996842816 | 2.17286706454629 |
| 1.41499996837229 | 3.04788543928836 |
| 1.41749996831641 | 2.14762727880259 |
| 1.41999996826053 | 3.04987747728233 |
| 1.42249996820465 | 2.12112605550802 |
| 1.42499996814877 | 3.02343934600994 |
| 1.42749996809289 | 2.10087171568709 |
| 1.42999996803701 | 2.99294103359054 |
| 1.43249996798113 | 2.09232750426911 |
| 1.43499996792525 | 2.98229450151138 |
| 1.43749996786937 | 2.08263566037701 |
| 1.43999996781349 | 3.01601632478523 |
| 1.44249996775761 | 2.09936140288660 |

|                  |                  |
|------------------|------------------|
| 1.44499996770173 | 3.01920911846530 |
| 1.44749996764585 | 2.11600017238208 |
| 1.44999996758997 | 3.01589889010159 |
| 1.45249996753410 | 2.12249106750111 |
| 1.45499996747822 | 3.03271230410980 |
| 1.45749996742234 | 2.12340146984337 |
| 1.45999996736646 | 3.08858047628939 |
| 1.46249996731058 | 2.15827088704477 |
| 1.46499996725470 | 3.10948281318373 |
| 1.46749996719882 | 2.19460142340107 |
| 1.46999996714294 | 3.10365153534027 |
| 1.47249996708706 | 2.19641479917251 |
| 1.47499996703118 | 3.11169753188979 |
| 1.47749996697530 | 2.16552888655912 |
| 1.47999996691942 | 3.15363117708048 |
| 1.48249996686354 | 2.15660819342805 |
| 1.48499996680766 | 3.17008522785208 |
| 1.48749996675178 | 2.16941398700963 |
| 1.48999996669590 | 3.14354848518438 |
| 1.49249996664003 | 2.16718795255003 |
| 1.49499996658415 | 3.12208266561377 |
| 1.49749996652827 | 2.12762984235910 |
| 1.49999996647239 | 3.12783360069570 |
| 1.50249996641651 | 2.10126440492623 |
| 1.50499996636063 | 3.12921719867669 |
| 1.50749996630475 | 2.10983484423639 |
| 1.50999996624887 | 3.08835828907237 |
| 1.51249996619299 | 2.12549058215980 |
| 1.51499996613711 | 3.05868924011594 |
| 1.51749996608123 | 2.11373015444143 |
| 1.51999996602535 | 3.05494783461486 |
| 1.52249996596947 | 2.10046083655492 |
| 1.52499996591359 | 3.06474590767293 |
| 1.52749996585771 | 2.12149264505371 |
| 1.52999996580184 | 3.02865276744265 |
| 1.53249996574596 | 2.14642415701208 |
| 1.53499996569008 | 3.00188792247862 |
| 1.53749996563420 | 2.14838011314595 |
| 1.53999996557832 | 2.99847122587311 |
| 1.54249996552244 | 2.12411714819028 |
| 1.54499996546656 | 3.02193614963602 |
| 1.54749996541068 | 2.12418349844122 |
| 1.54999996535480 | 3.01014867594310 |
| 1.55249996529892 | 2.12793139973097 |
| 1.55499996524304 | 2.99739178424493 |
| 1.55749996518716 | 2.12460856712807 |
| 1.55999996513128 | 3.01192584462201 |
| 1.56249996507540 | 2.09859506013023 |
| 1.56499996501952 | 3.04614200906081 |
| 1.56749996496364 | 2.09000586968386 |
| 1.56999996490777 | 3.06267832723484 |
| 1.57249996485189 | 2.09610325390187 |



|                  |                  |
|------------------|------------------|
| 1.57499996479601 | 3.05283864901521 |
| 1.57749996474013 | 2.11469652962500 |
| 1.57999996468425 | 3.07683087479390 |
| 1.58249996462837 | 2.12705533168134 |
| 1.58499996457249 | 3.10736933886736 |
| 1.58749996451661 | 2.14085307215348 |
| 1.58999996446073 | 3.14305449226576 |
| 1.59249996440485 | 2.15281985679016 |
| 1.59499996434897 | 3.13396297202009 |
| 1.59749996429309 | 2.16018434577746 |
| 1.59999996423721 | 3.14429795171689 |
| 1.60249996418133 | 2.16591391645328 |
| 1.60499996412545 | 3.14485911064931 |
| 1.60749996406958 | 2.17840982122419 |
| 1.60999996401370 | 3.15077059157439 |
| 1.61249996395782 | 2.18801640573123 |
| 1.61499996390194 | 3.11931429574530 |
| 1.61749996384606 | 2.16828381581056 |
| 1.61999996379018 | 3.09208811762731 |
| 1.62249996373430 | 2.12353599783804 |
| 1.62499996367842 | 3.08188036060601 |
| 1.62749996362254 | 2.09295833267005 |
| 1.62999996356666 | 3.07055919189844 |
| 1.63249996351078 | 2.10218561140614 |
| 1.63499996345490 | 3.03944114850132 |
| 1.63749996339902 | 2.10871092576697 |
| 1.63999996334314 | 2.99774866446305 |
| 1.64249996328726 | 2.08597118598053 |
| 1.64499996323138 | 2.99395250468774 |
| 1.64749996317551 | 2.06027113369406 |
| 1.64999996311963 | 2.99470781384846 |
| 1.65249996306375 | 2.08240677790796 |
| 1.65499996300787 | 2.99873312553568 |
| 1.65749996295199 | 2.12121788817509 |
| 1.65999996289611 | 2.98616103344478 |
| 1.66249996284023 | 2.14566687692824 |
| 1.66499996278435 | 3.01328526839677 |
| 1.66749996272847 | 2.13735699288327 |
| 1.66999996267259 | 3.03816406263536 |
| 1.67249996261671 | 2.13582601961794 |
| 1.67499996256083 | 3.05976979716971 |
| 1.67749996250495 | 2.14225410662157 |
| 1.67999996244907 | 3.05583165813187 |
| 1.68249996239319 | 2.15745116981335 |
| 1.68499996233732 | 3.07631056558355 |
| 1.68749996228144 | 2.14962362723361 |
| 1.68999996222556 | 3.10442163193742 |
| 1.69249996216968 | 2.12892773874855 |
| 1.69499996211380 | 3.11938498776826 |
| 1.69749996205792 | 2.10587642340594 |
| 1.69999996200204 | 3.11577571902664 |
| 1.70249996194616 | 2.10110592696061 |



|                  |                  |
|------------------|------------------|
| 1.70499996189028 | 3.12047879102583 |
| 1.70749996183440 | 2.11197558976921 |
| 1.70999996177852 | 3.13661619077167 |
| 1.71249996172264 | 2.13460238203418 |
| 1.71499996166676 | 3.13102266668177 |
| 1.71749996161088 | 2.14766911702734 |
| 1.71999996155500 | 3.11075381448179 |
| 1.72249996149912 | 2.13974644888080 |
| 1.72499996144325 | 3.09978551681645 |
| 1.72749996138737 | 2.13230467393991 |
| 1.72999996133149 | 3.11405491596503 |
| 1.73249996127561 | 2.14628179086974 |
| 1.73499996121973 | 3.09588829048675 |
| 1.73749996116385 | 2.17323620586005 |
| 1.73999996110797 | 3.05814629947833 |
| 1.74249996105209 | 2.16249311531528 |
| 1.74499996099621 | 3.02592538595221 |
| 1.74749996094033 | 2.12370649857743 |
| 1.74999996088445 | 3.02860803903608 |
| 1.75249996082857 | 2.09162571975844 |
| 1.75499996077269 | 3.01400020187076 |
| 1.75749996071681 | 2.09552292206862 |
| 1.75999996066093 | 2.98759576788712 |
| 1.76249996060506 | 2.08871133628513 |
| 1.76499996054918 | 2.97625766785741 |
| 1.76749996049330 | 2.06840798490385 |
| 1.76999996043742 | 2.99874401657427 |
| 1.77249996038154 | 2.05798846408769 |
| 1.77499996032566 | 3.01354401000832 |
| 1.77749996026978 | 2.08774412631888 |
| 1.77999996021390 | 3.01073017265164 |
| 1.78249996015802 | 2.11971245068901 |
| 1.78499996010214 | 3.02706059953398 |
| 1.78749996004626 | 2.13809827374258 |
| 1.78999995999038 | 3.06767737614861 |
| 1.79249995993450 | 2.14383507778047 |
| 1.79499995987862 | 3.10779170788182 |
| 1.79749995982274 | 2.16455948061701 |
| 1.79999995976686 | 3.11064903874368 |
| 1.80249995971099 | 2.18106694297493 |
| 1.80499995965511 | 3.11966968031088 |
| 1.80749995959923 | 2.17805362426663 |
| 1.80999995954335 | 3.13507724090954 |
| 1.81249995948747 | 2.15410505784583 |
| 1.81499995943159 | 3.15689658704272 |
| 1.81749995937571 | 2.14145412769081 |
| 1.81999995931983 | 3.13671344485482 |
| 1.82249995926395 | 2.13656866189341 |
| 1.82499995920807 | 3.11271244995583 |
| 1.82749995915219 | 2.12082875190926 |
| 1.82999995909631 | 3.10332957615816 |
| 1.83249995904043 | 2.09691965434754 |

|                  |                  |
|------------------|------------------|
| 1.83499995898455 | 3.10875549732188 |
| 1.83749995892867 | 2.08848309389518 |
| 1.83999995887280 | 3.09189804769627 |
| 1.84249995881692 | 2.10329956938354 |
| 1.84499995876104 | 3.04784689916439 |
| 1.84749995870516 | 2.11148816092016 |
| 1.84999995864928 | 3.03473263359130 |
| 1.85249995859340 | 2.12147376015378 |
| 1.85499995853752 | 3.03010112400857 |
| 1.85749995848164 | 2.12943122171086 |
| 1.85999995842576 | 3.03215084329144 |
| 1.86249995836988 | 2.14329998171535 |
| 1.86499995831400 | 2.99717234626956 |
| 1.86749995825812 | 2.13092637581358 |
| 1.86999995820224 | 2.99655186043309 |
| 1.87249995814636 | 2.11874631397013 |
| 1.87499995809048 | 3.00020834896528 |
| 1.87749995803460 | 2.11026053000192 |
| 1.87999995797873 | 3.01479594996759 |
| 1.88249995792285 | 2.11667226784521 |
| 1.88499995786697 | 3.00013981291872 |
| 1.88749995781109 | 2.09992902167907 |
| 1.88999995775521 | 3.00415844638411 |
| 1.89249995769933 | 2.06949301482610 |
| 1.89499995764345 | 3.03530460298369 |
| 1.89749995758757 | 2.05993543825140 |
| 1.89999995753169 | 3.06649944806354 |
| 1.90249995747581 | 2.09947945425836 |
| 1.90499995741993 | 3.07636923824726 |
| 1.90749995736405 | 2.14368466231323 |
| 1.90999995730817 | 3.07747006982456 |
| 1.91249995725229 | 2.14752658615999 |
| 1.91499995719641 | 3.12010427208403 |
| 1.91749995714054 | 2.13549412888071 |
| 1.91999995708466 | 3.14827183387553 |
| 1.92249995702878 | 2.15571468009428 |
| 1.92499995697290 | 3.15709105997926 |
| 1.92749995691702 | 2.19752771504002 |
| 1.92999995686114 | 3.12562397703467 |
| 1.93249995680526 | 2.20526746661193 |
| 1.93499995674938 | 3.13838868715875 |
| 1.93749995669350 | 2.17110069055376 |
| 1.93999995663762 | 3.13798790648180 |
| 1.94249995658174 | 2.13385743639330 |
| 1.94499995652586 | 3.12196588314110 |
| 1.94749995646998 | 2.11975688710121 |
| 1.94999995641410 | 3.06823003340036 |
| 1.95249995635822 | 2.10775657329161 |
| 1.95499995630234 | 3.05108413870168 |
| 1.95749995624647 | 2.09391880003213 |
| 1.95999995619059 | 3.04167352218561 |
| 1.96249995613471 | 2.07598052064705 |

|                  |                  |
|------------------|------------------|
| 1.96499995607883 | 3.01858996309701 |
| 1.96749995602295 | 2.06625435820206 |
| 1.96999995596707 | 2.97885558453746 |
| 1.97249995591119 | 2.06177404240838 |
| 1.97499995585531 | 2.97635617902646 |
| 1.97749995579943 | 2.08817905180495 |
| 1.97999995574355 | 2.99463583597956 |
| 1.98249995568767 | 2.12625307611912 |
| 1.98499995563179 | 2.99520520885498 |
| 1.98749995557591 | 2.15468755284403 |
| 1.98999995552003 | 2.98800910452980 |
| 1.99249995546415 | 2.14297772204822 |
| 1.99499995540828 | 2.99898986717261 |
| 1.99749995535240 | 2.12508589142627 |
| 1.99999995529652 | 3.04864340114304 |
| 2.00249995524064 | 2.12550010000682 |
| 2.00499995518476 | 3.05900240768947 |
| 2.00749995512888 | 2.14861547044300 |
| 2.00999995507300 | 3.06107796049349 |
| 2.01249995501712 | 2.14142935435680 |
| 2.01499995496124 | 3.05446875625992 |
| 2.01749995490536 | 2.09504355268572 |
| 2.01999995484948 | 3.10399179142487 |
| 2.02249995479360 | 2.06584054490491 |
| 2.02499995473772 | 3.11936685984897 |
| 2.02749995468184 | 2.09290745002711 |
| 2.02999995462596 | 3.11720675700201 |
| 2.03249995457008 | 2.13541828122665 |
| 2.03499995451421 | 3.09738205669207 |
| 2.03749995445833 | 2.13440469051279 |
| 2.03999995440245 | 3.12978704921261 |
| 2.04249995434657 | 2.12073096794714 |
| 2.04499995429069 | 3.14684533964858 |
| 2.04749995423481 | 2.13681793581976 |
| 2.04999995417893 | 3.12775744570643 |
| 2.05249995412305 | 2.17277290634272 |
| 2.05499995406717 | 3.08980014201534 |
| 2.05749995401129 | 2.18058443999906 |
| 2.05999995395541 | 3.07917678919610 |
| 2.06249995389953 | 2.15704471717603 |
| 2.06499995384365 | 3.08862387306224 |
| 2.06749995378777 | 2.13350732714631 |
| 2.06999995373189 | 3.05429141801941 |
| 2.07249995367602 | 2.11878116823517 |
| 2.07499995362014 | 3.01236955064862 |
| 2.07749995356426 | 2.09534904536738 |
| 2.07999995350838 | 2.98355602626162 |
| 2.08249995345250 | 2.06402253439855 |
| 2.08499995339662 | 3.00282566925588 |
| 2.08749995334074 | 2.05318716805994 |
| 2.08999995328486 | 2.99024105191087 |
| 2.09249995322898 | 2.07077391030383 |

|                  |                  |
|------------------|------------------|
| 2.09499995317310 | 2.96494521241945 |
| 2.09749995311722 | 2.08224450542822 |
| 2.09999995306134 | 2.96479252425983 |
| 2.10249995300546 | 2.08603110061236 |
| 2.10499995294958 | 3.02061403379214 |
| 2.10749995289370 | 2.10537269221152 |
| 2.10999995283782 | 3.05976964036200 |
| 2.11249995278195 | 2.15366418671830 |
| 2.11499995272607 | 3.05738076544270 |
| 2.11749995267019 | 2.18077855737372 |
| 2.11999995261431 | 3.05957328692842 |
| 2.12249995255843 | 2.17312352397097 |
| 2.12499995250255 | 3.10692127969683 |
| 2.12749995244667 | 2.15850539534975 |
| 2.12999995239079 | 3.15073628257428 |
| 2.13249995233491 | 2.16729735785263 |
| 2.13499995227903 | 3.14249101710570 |
| 2.13749995222315 | 2.16536848707097 |
| 2.13999995216727 | 3.11410502413470 |
| 2.14249995211139 | 2.12336782666805 |
| 2.14499995205551 | 3.13452985505658 |
| 2.14749995199963 | 2.08527075008163 |
| 2.14999995194376 | 3.15806097830457 |
| 2.15249995188788 | 2.09497973773614 |
| 2.15499995183200 | 3.13593641867067 |
| 2.15749995177612 | 2.12405556382831 |
| 2.15999995172024 | 3.07888894814526 |
| 2.16249995166436 | 2.11248760729667 |
| 2.16499995160848 | 3.07923971756098 |
| 2.16749995155260 | 2.08747184311765 |
| 2.16999995149672 | 3.10149011632425 |
| 2.17249995144084 | 2.10922551900004 |
| 2.17499995138496 | 3.08900300342408 |
| 2.17749995132908 | 2.15817191067139 |
| 2.17999995127320 | 3.03101801175018 |
| 2.18249995121732 | 2.17275809246474 |
| 2.18499995116144 | 3.01163520860678 |
| 2.18749995110556 | 2.13847506102970 |
| 2.18999995104969 | 3.02985804589159 |
| 2.19249995099381 | 2.12126164861315 |
| 2.19499995093793 | 3.02823730841376 |
| 2.19749995088205 | 2.13269804136333 |
| 2.19999995082617 | 2.98568705936875 |
| 2.20249995077029 | 2.13331237184806 |
| 2.20499995071441 | 2.97220370846498 |
| 2.20749995065853 | 2.08920487298900 |
| 2.20999995060265 | 3.00962844858481 |
| 2.21249995054677 | 2.04794708678740 |
| 2.21499995049089 | 3.03765539868152 |
| 2.21749995043501 | 2.05790735313473 |
| 2.21999995037913 | 3.02172999473001 |
| 2.22249995032325 | 2.09575393310331 |

|                  |                  |
|------------------|------------------|
| 2.22499995026737 | 3.01687164874245 |
| 2.22749995021150 | 2.12022907324468 |
| 2.22999995015562 | 3.06851652572086 |
| 2.23249995009974 | 2.12701952198987 |
| 2.23499995004386 | 3.12281581111038 |
| 2.23749994998798 | 2.14595148166285 |
| 2.23999994993210 | 3.13518537688061 |
| 2.24249994987622 | 2.16777871996060 |
| 2.24499994982034 | 3.12756066236500 |
| 2.24749994976446 | 2.18244762534591 |
| 2.24999994970858 | 3.15928554365461 |
| 2.25249994965270 | 2.19019090262265 |
| 2.25499994959682 | 3.17467803170353 |
| 2.25749994954094 | 2.20051649934305 |
| 2.25999994948506 | 3.16609197616920 |
| 2.26249994942918 | 2.18689058177175 |
| 2.26499994937330 | 3.11250932596274 |
| 2.26749994931743 | 2.14071855794567 |
| 2.26999994926155 | 3.11704658931431 |
| 2.27249994920567 | 2.09452999866557 |
| 2.27499994914979 | 3.11142286160737 |
| 2.27749994909391 | 2.09326199229361 |
| 2.27999994903803 | 3.09461710065688 |
| 2.28249994898215 | 2.10812655859794 |
| 2.28499994892627 | 3.03155350494247 |
| 2.28749994887039 | 2.09256442050920 |
| 2.28999994881451 | 3.01157788708727 |
| 2.29249994875863 | 2.06293156998869 |
| 2.29499994870275 | 3.01391375745110 |
| 2.29749994864687 | 2.08130498440305 |
| 2.29999994859099 | 3.00730546858180 |
| 2.30249994853511 | 2.12906979638855 |
| 2.30499994847924 | 2.98504511817929 |
| 2.30749994842336 | 2.15826470028424 |
| 2.30999994836748 | 2.98097861034745 |
| 2.31249994831160 | 2.14357377117817 |
| 2.31499994825572 | 3.01957464249420 |
| 2.31749994819984 | 2.13072505975689 |
| 2.31999994814396 | 3.02871428121604 |
| 2.32249994808808 | 2.13642884046860 |
| 2.32499994803220 | 3.03138850040307 |
| 2.32749994797632 | 2.14931204410086 |
| 2.32999994792044 | 3.01745823421071 |
| 2.33249994786456 | 2.13231643162970 |
| 2.33499994780868 | 3.06400229831670 |
| 2.33749994775280 | 2.10078475153072 |
| 2.33999994769692 | 3.08551317470887 |
| 2.34249994764104 | 2.08785283057451 |
| 2.34499994758517 | 3.09823135234040 |
| 2.34749994752929 | 2.09670437286924 |
| 2.34999994747341 | 3.09105789450942 |
| 2.35249994741753 | 2.10995588449474 |

|                  |                  |
|------------------|------------------|
| 2.35499994736165 | 3.12743074436094 |
| 2.35749994730577 | 2.12450021466768 |
| 2.35999994724989 | 3.15190052870597 |
| 2.36249994719401 | 2.15534593521388 |
| 2.36499994713813 | 3.14266464005691 |
| 2.36749994708225 | 2.17436744578395 |
| 2.36999994702637 | 3.12190789423199 |
| 2.37249994697049 | 2.17598011906014 |
| 2.37499994691461 | 3.13490059804039 |
| 2.37749994685873 | 2.16821097556073 |
| 2.37999994680285 | 3.15421569683146 |
| 2.38249994674698 | 2.18261049314164 |
| 2.38499994669110 | 3.12595447346662 |
| 2.38749994663522 | 2.18251601073944 |
| 2.38999994657934 | 3.07514585561433 |
| 2.39249994652346 | 2.15071724179586 |
| 2.39499994646758 | 3.04966586455795 |
| 2.39749994641170 | 2.10300702490695 |
| 2.39999994635582 | 3.05356277263871 |
| 2.40249994629994 | 2.08959060048278 |
| 2.40499994624406 | 3.02416562858865 |
| 2.40749994618818 | 2.08726153499675 |
| 2.40999994613230 | 2.98103573372243 |
| 2.41249994607642 | 2.07042487886062 |
| 2.41499994602054 | 2.96983231269680 |
| 2.41749994596466 | 2.04877588803095 |
| 2.41999994590878 | 3.00115595712402 |
| 2.42249994585291 | 2.07077917470140 |
| 2.42499994579703 | 3.00490883222736 |
| 2.42749994574115 | 2.11857284709070 |
| 2.42999994568527 | 2.99245331895787 |
| 2.43249994562939 | 2.14767167098838 |
| 2.43499994557351 | 3.00305932495514 |
| 2.43749994551763 | 2.14327921266712 |
| 2.43999994546175 | 3.05877387954863 |
| 2.44249994540587 | 2.15222440095149 |
| 2.44499994534999 | 3.08831124300741 |
| 2.44749994529411 | 2.18176638036936 |
| 2.44999994523823 | 3.08765625396513 |
| 2.45249994518235 | 2.18984598291136 |
| 2.45499994512647 | 3.09463209181609 |
| 2.45749994507059 | 2.15305237844368 |
| 2.45999994501472 | 3.13501980425802 |
| 2.46249994495884 | 2.11812155928101 |
| 2.46499994490296 | 3.15296679191345 |
| 2.46749994484708 | 2.12707038508955 |
| 2.46999994479120 | 3.12616680669874 |
| 2.47249994473532 | 2.14070432734859 |
| 2.47499994467944 | 3.10892242574272 |
| 2.47749994462356 | 2.12867463123818 |
| 2.47999994456768 | 3.12522605241061 |
| 2.48249994451180 | 2.09959363218886 |



|                  |                  |
|------------------|------------------|
| 2.48499994445592 | 3.14280978797334 |
| 2.48749994440004 | 2.10679459830948 |
| 2.48999994434416 | 3.11737452022595 |
| 2.49249994428828 | 2.13073878049704 |
| 2.49499994423240 | 3.08478961059746 |
| 2.49749994417652 | 2.15839672788554 |
| 2.49999994412065 | 3.07362675949911 |
| 2.50249994406477 | 2.16534402987631 |
| 2.50499994400889 | 3.07040644411143 |
| 2.50749994395301 | 2.16917172012845 |
| 2.50999994389713 | 3.04558016883171 |
| 2.51249994384125 | 2.15344983951449 |
| 2.51499994378537 | 3.00853338678317 |
| 2.51749994372949 | 2.13549896974197 |
| 2.51999994367361 | 3.00580836812163 |
| 2.52249994361773 | 2.11566600599882 |
| 2.52499994356185 | 3.00360987776392 |
| 2.52749994350597 | 2.11013198710365 |
| 2.52999994345009 | 2.99763690500534 |
| 2.53249994339421 | 2.09884119758142 |
| 2.53499994333833 | 2.96664254553965 |
| 2.53749994328246 | 2.07218224216742 |
| 2.53999994322658 | 2.97685008662327 |
| 2.54249994317070 | 2.05291788057584 |
| 2.54499994311482 | 3.00276248717227 |
| 2.54749994305894 | 2.07766437434587 |
| 2.54999994300306 | 3.03375306305606 |
| 2.55249994294718 | 2.13167907937851 |
| 2.55499994289130 | 3.04154991144614 |
| 2.55749994283542 | 2.15427474430422 |
| 2.55999994277954 | 3.07241622507466 |
| 2.56249994272366 | 2.14823790145901 |
| 2.56499994266778 | 3.11972522333634 |
| 2.56749994261190 | 2.16134632130277 |
| 2.56999994255602 | 3.14369558244179 |
| 2.57249994250014 | 2.20849387984980 |
| 2.57499994244426 | 3.14016219639448 |
| 2.57749994238839 | 2.23370365485263 |
| 2.57999994233251 | 3.13390755297999 |
| 2.58249994227663 | 2.21097502913149 |
| 2.58499994222075 | 3.16207682450158 |
| 2.58749994216487 | 2.16481983881662 |
| 2.58999994210899 | 3.16212371765211 |
| 2.59249994205311 | 2.14270392697008 |
| 2.59499994199723 | 3.14731624602645 |
| 2.59749994194135 | 2.13510737263633 |
| 2.59999994188547 | 3.10351795113835 |
| 2.60249994182959 | 2.12714519057280 |
| 2.60499994177371 | 3.09862691604346 |
| 2.60749994171783 | 2.10487469042577 |
| 2.60999994166195 | 3.07384638366786 |
| 2.61249994160607 | 2.09407808404319 |



|                  |                  |
|------------------|------------------|
| 2.61499994155020 | 3.04305366931936 |
| 2.61749994149432 | 2.08797858140978 |
| 2.61999994143844 | 3.00693311725984 |
| 2.62249994138256 | 2.10028587868223 |
| 2.62499994132668 | 3.01681994195610 |
| 2.62749994127080 | 2.11888299603659 |
| 2.62999994121492 | 3.01705830830712 |
| 2.63249994115904 | 2.15090902843286 |
| 2.63499994110316 | 2.99845271679695 |
| 2.63749994104728 | 2.16312346410856 |
| 2.63999994099140 | 2.97461824936545 |
| 2.64249994093552 | 2.15542204576412 |
| 2.64499994087964 | 2.99125564265076 |
| 2.64749994082376 | 2.13898789446528 |
| 2.64999994076788 | 3.02027157993184 |
| 2.65249994071200 | 2.14139882873882 |
| 2.65499994065613 | 3.02273250687172 |
| 2.65749994060025 | 2.14031863052677 |
| 2.65999994054437 | 3.02291644758584 |
| 2.66249994048849 | 2.11120920219385 |
| 2.66499994043261 | 3.04928960189566 |
| 2.66749994037673 | 2.08567328083116 |
| 2.66999994032085 | 3.09313089642744 |
| 2.67249994026497 | 2.09842453461758 |
| 2.67499994020909 | 3.09673446540222 |
| 2.67749994015321 | 2.13459683311252 |
| 2.67999994009733 | 3.09627124494738 |
| 2.68249994004145 | 2.13968859716198 |
| 2.68499993998557 | 3.11507568708322 |
| 2.68749993992969 | 2.13891736334062 |
| 2.68999993987381 | 3.16121200401745 |
| 2.69249993981794 | 2.15938285897545 |
| 2.69499993976206 | 3.15861295595282 |
| 2.69749993970618 | 2.20035146229256 |
| 2.69999993965030 | 3.14225771756455 |
| 2.70249993959442 | 2.21012633076505 |
| 2.70499993953854 | 3.12614196478807 |
| 2.70749993948266 | 2.19211143296800 |
| 2.70999993942678 | 3.14272199804151 |
| 2.71249993937090 | 2.17467552773328 |
| 2.71499993931502 | 3.11625142119984 |
| 2.71749993925914 | 2.17925579927231 |
| 2.71999993920326 | 3.07114830106574 |
| 2.72249993914738 | 2.15981034159831 |
| 2.72499993909150 | 3.03918685388280 |
| 2.72749993903562 | 2.10870347007847 |
| 2.72999993897974 | 3.04860212524773 |
| 2.73249993892387 | 2.06317715597910 |
| 2.73499993886799 | 3.03566693536923 |
| 2.73749993881211 | 2.07272255798334 |
| 2.73999993875623 | 2.98699272608254 |
| 2.74249993870035 | 2.09447339992777 |

|                  |                  |
|------------------|------------------|
| 2.74499993864447 | 2.96435376363095 |
| 2.74749993858859 | 2.10272575152943 |
| 2.74999993853271 | 2.98662671742520 |
| 2.75249993847683 | 2.10202105516239 |
| 2.75499993842095 | 3.01897612633853 |
| 2.75749993836507 | 2.12686762539891 |
| 2.75999993830919 | 3.00962802428091 |
| 2.76249993825331 | 2.15474244281097 |
| 2.76499993819743 | 3.01881388611272 |
| 2.76749993814155 | 2.17146944796467 |
| 2.76999993808568 | 3.04944369702311 |
| 2.77249993802980 | 2.18070962365304 |
| 2.77499993797392 | 3.09213098686715 |
| 2.77749993791804 | 2.18643664026036 |
| 2.77999993786216 | 3.09136068595012 |
| 2.78249993780628 | 2.17425433982573 |
| 2.78499993775040 | 3.08888524748411 |
| 2.78749993769452 | 2.13685848124601 |
| 2.78999993763864 | 3.11801802582682 |
| 2.79249993758276 | 2.11925246681395 |
| 2.79499993752688 | 3.14924152738227 |
| 2.79749993747100 | 2.12946841042688 |
| 2.79999993741512 | 3.14875536661424 |
| 2.80249993735924 | 2.14808164734397 |
| 2.80499993730336 | 3.11836477518763 |
| 2.80749993724748 | 2.12739221184482 |
| 2.80999993719161 | 3.12196774623538 |
| 2.81249993713573 | 2.11093342195864 |
| 2.81499993707985 | 3.13610626268260 |
| 2.81749993702397 | 2.13099900590333 |
| 2.81999993696809 | 3.12495901915689 |
| 2.82249993691221 | 2.18674265901500 |
| 2.82499993685633 | 3.07934884801414 |
| 2.82749993680045 | 2.19962413856504 |
| 2.82999993674457 | 3.05893548239874 |
| 2.83249993668869 | 2.16541502625432 |
| 2.83499993663281 | 3.07281899179255 |
| 2.83749993657693 | 2.13373922403536 |
| 2.83999993652105 | 3.06228454879441 |
| 2.84249993646517 | 2.14598147808433 |
| 2.84499993640929 | 3.01707810187489 |
| 2.84749993635342 | 2.15342644415917 |
| 2.84999993629754 | 2.98113120854148 |
| 2.85249993624166 | 2.12245548919430 |
| 2.85499993618578 | 2.99984060277109 |
| 2.85749993612990 | 2.07713046227554 |
| 2.85999993607402 | 3.00580967422058 |
| 2.86249993601814 | 2.06528382158264 |
| 2.86499993596226 | 2.99179265689820 |
| 2.86749993590638 | 2.07854263894561 |
| 2.86999993585050 | 2.98513620430392 |
| 2.87249993579462 | 2.09421068764224 |

|                  |                  |
|------------------|------------------|
| 2.87499993573874 | 3.02967516125426 |
| 2.87749993568286 | 2.11713342082992 |
| 2.87999993562698 | 3.06380237364570 |
| 2.88249993557110 | 2.14815080402983 |
| 2.88499993551522 | 3.06103135759208 |
| 2.88749993545935 | 2.16765176961384 |
| 2.88999993540347 | 3.06575680117308 |
| 2.89249993534759 | 2.16685938119967 |
| 2.89499993529171 | 3.11843368432519 |
| 2.89749993523583 | 2.17558849535131 |
| 2.89999993517995 | 3.16159102617669 |
| 2.90249993512407 | 2.19535087633731 |
| 2.90499993506819 | 3.14956229204647 |
| 2.90749993501231 | 2.19835624841175 |
| 2.90999993495643 | 3.12572199405337 |
| 2.91249993490055 | 2.15875925553059 |
| 2.91499993484467 | 3.14505930621856 |
| 2.91749993478879 | 2.12669468963765 |
| 2.91999993473291 | 3.16404791629726 |
| 2.92249993467703 | 2.12761955887372 |
| 2.92499993462116 | 3.13334656421549 |
| 2.92749993456528 | 2.14563080229335 |
| 2.92999993450940 | 3.08274046692014 |
| 2.93249993445352 | 2.11766264290680 |
| 2.93499993439764 | 3.07895278996447 |
| 2.93749993434176 | 2.08781399180794 |
| 2.93999993428588 | 3.09296917600629 |
| 2.94249993423000 | 2.09483675139353 |
| 2.94499993417412 | 3.05984813113478 |
| 2.94749993411824 | 2.13696870334032 |
| 2.94999993406236 | 3.00605834077651 |
| 2.95249993400648 | 2.14228407857501 |
| 2.95499993395060 | 2.98990433739760 |
| 2.95749993389472 | 2.12363419433150 |
| 2.95999993383884 | 3.01925914032449 |
| 2.96249993378296 | 2.11785673145045 |
| 2.96499993372709 | 3.01098784910766 |
| 2.96749993367121 | 2.13341815382475 |
| 2.96999993361533 | 2.98650979182858 |
| 2.97249993355945 | 2.12933328862933 |
| 2.97499993350357 | 2.98299215881202 |
| 2.97749993344769 | 2.09582103505524 |
| 2.97999993339181 | 3.03175614490694 |
| 2.98249993333593 | 2.08558032012819 |
| 2.98499993328005 | 3.04584977410509 |
| 2.98749993322417 | 2.11240681764995 |
| 2.98999993316829 | 3.02761140659712 |
| 2.99249993311241 | 2.13606269897889 |
| 2.99499993305653 | 3.03359741783448 |
| 2.99749993300065 | 2.11714302648782 |
| 2.99999993294477 | 3.10287462190998 |
| 3.00249993288890 | 2.10804562344201 |

|                  |                  |
|------------------|------------------|
| 3.00499993283302 | 3.15101560076636 |
| 3.00749993277714 | 2.14080000662182 |
| 3.00999993272126 | 3.12856942270265 |
| 3.01249993266538 | 2.18247339724497 |
| 3.01499993260950 | 3.11201569897293 |
| 3.01749993255362 | 2.18194693415399 |
| 3.01999993249774 | 3.14343452333558 |
| 3.02249993244186 | 2.16667406720577 |
| 3.02499993238598 | 3.18441896512849 |
| 3.02749993233010 | 2.16551134620302 |
| 3.02999993227422 | 3.15202061050765 |
| 3.03249993221834 | 2.16920814125731 |
| 3.03499993216246 | 3.11365342173354 |
| 3.03749993210658 | 2.13991163335896 |
| 3.03999993205070 | 3.11704127580515 |
| 3.04249993199483 | 2.11473094791985 |
| 3.04499993193895 | 3.13217631341867 |
| 3.04749993188307 | 2.11781448186993 |
| 3.04999993182719 | 3.09046329411773 |
| 3.05249993177131 | 2.13285224479592 |
| 3.05499993171543 | 3.01623595086741 |
| 3.05749993165955 | 2.10684119703361 |
| 3.05999993160367 | 3.00304622550769 |
| 3.06249993154779 | 2.08147880094177 |
| 3.06499993149191 | 3.02291541156050 |
| 3.06749993143603 | 2.09236930291118 |
| 3.06999993138015 | 3.01559201553360 |
| 3.07249993132427 | 2.12615348332664 |
| 3.07499993126839 | 2.97076249464207 |
| 3.07749993121251 | 2.12228422367905 |
| 3.07999993115664 | 2.96841695794021 |
| 3.08249993110076 | 2.09216193071904 |
| 3.08499993104488 | 3.00744844788069 |
| 3.08749993098900 | 2.09650248587880 |
| 3.08999993093312 | 3.02614337000430 |
| 3.09249993087724 | 2.13743443640384 |
| 3.09499993082136 | 3.00670270001193 |
| 3.09749993076548 | 2.15901433729932 |
| 3.09999993070960 | 3.01945025395352 |
| 3.10249993065372 | 2.12022906620700 |
| 3.10499993059784 | 3.09047308294944 |
| 3.10749993054196 | 2.09385927102325 |
| 3.10999993048608 | 3.13460078699872 |
| 3.11249993043020 | 2.12179615103478 |
| 3.11499993037432 | 3.12137403765265 |
| 3.11749993031844 | 2.17440942986228 |
| 3.11999993026257 | 3.10167481043291 |
| 3.12249993020669 | 2.17792604805994 |
| 3.12499993015081 | 3.14283576784152 |
| 3.12749993009493 | 2.15706736430947 |
| 3.12999993003905 | 3.17339464968935 |
| 3.13249992998317 | 2.14873554997934 |

|                  |                  |
|------------------|------------------|
| 3.13499992992729 | 3.15133987338307 |
| 3.13749992987141 | 2.15703771072297 |
| 3.13999992981553 | 3.11961769567202 |
| 3.14249992975965 | 2.14594490984974 |
| 3.14499992970377 | 3.13152791699659 |
| 3.14749992964789 | 2.13270600462910 |
| 3.14999992959201 | 3.14013876256799 |
| 3.15249992953613 | 2.13311446973785 |
| 3.15499992948025 | 3.09130328023813 |
| 3.15749992942438 | 2.13122349916709 |
| 3.15999992936850 | 3.02761325807690 |
| 3.16249992931262 | 2.10449986819577 |
| 3.16499992925674 | 3.02881986255934 |
| 3.16749992920086 | 2.08915101923078 |
| 3.16999992914498 | 3.04352243127154 |
| 3.17249992908910 | 2.10687742188861 |
| 3.17499992903322 | 3.01956586985894 |
| 3.17749992897734 | 2.12884928308065 |
| 3.17999992892146 | 2.97468827549964 |
| 3.18249992886558 | 2.11690484889047 |
| 3.18499992880970 | 2.98018943144643 |
| 3.18749992875382 | 2.10334343823851 |
| 3.18999992869794 | 3.00286140659438 |
| 3.19249992864206 | 2.12099235239545 |
| 3.19499992858618 | 2.99867623542006 |
| 3.19749992853031 | 2.14792050525177 |
| 3.19999992847443 | 2.97789610817453 |
| 3.20249992841855 | 2.13678100241017 |
| 3.20499992836267 | 3.00225485741601 |
| 3.20749992830679 | 2.09839483252390 |
| 3.20999992825091 | 3.06126044608720 |
| 3.21249992819503 | 2.09242737356354 |
| 3.21499992813915 | 3.08184869582317 |
| 3.21749992808327 | 2.12138203866866 |
| 3.21999992802739 | 3.07596193188635 |
| 3.22249992797151 | 2.14170219698071 |
| 3.22499992791563 | 3.08258581012322 |
| 3.22749992785975 | 2.12464300710143 |
| 3.22999992780387 | 3.13624637400906 |
| 3.23249992774799 | 2.12927605973603 |
| 3.23499992769212 | 3.15121973765033 |
| 3.23749992763624 | 2.15986355209421 |
| 3.23999992758036 | 3.14094646855641 |
| 3.24249992752448 | 2.18836847209788 |
| 3.24499992746860 | 3.12774231197217 |
| 3.24749992741272 | 2.17406172090882 |
| 3.24999992735684 | 3.15572644445712 |
| 3.25249992730096 | 2.16280163461608 |
| 3.25499992724508 | 3.15572462934442 |
| 3.25749992718920 | 2.16986752039704 |
| 3.25999992713332 | 3.10421594288381 |
| 3.26249992707744 | 2.17355582074213 |



|                  |                  |
|------------------|------------------|
| 3.26499992702156 | 3.05720703898984 |
| 3.26749992696568 | 2.13846968611411 |
| 3.26999992690980 | 3.05541442318730 |
| 3.27249992685392 | 2.09643495939488 |
| 3.27499992679805 | 3.06736092147061 |
| 3.27749992674217 | 2.08359415610574 |
| 3.27999992668629 | 3.01758078652387 |
| 3.28249992663041 | 2.08667933280943 |
| 3.28499992657453 | 2.97830469982807 |
| 3.28749992651865 | 2.08021992093216 |
| 3.28999992646277 | 2.97607883404472 |
| 3.29249992640689 | 2.08036371009374 |
| 3.29499992635101 | 3.00844186843522 |
| 3.29749992629513 | 2.10914593637804 |
| 3.29999992623925 | 2.99131417631515 |
| 3.30249992618337 | 2.13818741699108 |
| 3.30499992612749 | 2.97555035919391 |
| 3.30749992607161 | 2.14207082002487 |
| 3.30999992601573 | 3.00464952625244 |
| 3.31249992595986 | 2.13831283775363 |
| 3.31499992590398 | 3.05766520246446 |
| 3.31749992584810 | 2.15759952948873 |
| 3.31999992579222 | 3.07091911688862 |
| 3.32249992573634 | 2.17288935056390 |
| 3.32499992568046 | 3.05157366496321 |
| 3.32749992562458 | 2.14522028635266 |
| 3.32999992556870 | 3.07497515092578 |
| 3.33249992551282 | 2.09818021538141 |
| 3.33499992545694 | 3.12110128170458 |
| 3.33749992540106 | 2.10176186197628 |
| 3.33999992534518 | 3.14047962462376 |
| 3.34249992528930 | 2.13654668655637 |
| 3.34499992523342 | 3.11484339010294 |
| 3.34749992517754 | 2.14195507449736 |
| 3.34999992512167 | 3.12231088431261 |
| 3.35249992506579 | 2.10524601212994 |
| 3.35499992500991 | 3.15689457865621 |
| 3.35749992495403 | 2.11244946133180 |
| 3.35999992489815 | 3.16677209387130 |
| 3.36249992484227 | 2.16392191237600 |
| 3.36499992478639 | 3.11998483433365 |
| 3.36749992473051 | 2.20967037124658 |
| 3.36999992467463 | 3.09214796566416 |
| 3.37249992461875 | 2.19284203430115 |
| 3.37499992456287 | 3.10030471056024 |
| 3.37749992450699 | 2.15894865024322 |
| 3.37999992445111 | 3.10650733495835 |
| 3.38249992439523 | 2.14313667528718 |
| 3.38499992433935 | 3.05905784577589 |
| 3.38749992428347 | 2.14478892063788 |
| 3.38999992422760 | 3.01473075044688 |
| 3.39249992417172 | 2.12669979701062 |

|                  |                  |
|------------------|------------------|
| 3.39499992411584 | 2.99989608615782 |
| 3.39749992405996 | 2.08859425772528 |
| 3.39999992400408 | 3.00440166223276 |
| 3.40249992394820 | 2.05859697561762 |
| 3.40499992389232 | 2.97453022249951 |
| 3.40749992383644 | 2.04957098156687 |
| 3.40999992378056 | 2.95691324718734 |
| 3.41249992372468 | 2.06060747842766 |
| 3.41499992366880 | 2.98319671011450 |
| 3.41749992361292 | 2.08664210769025 |
| 3.41999992355704 | 3.02472618619884 |
| 3.42249992350116 | 2.13233014809293 |
| 3.42499992344528 | 3.03826873205136 |
| 3.42749992338941 | 2.16438882468331 |
| 3.42999992333353 | 3.03462440563721 |
| 3.43249992327765 | 2.17327928653383 |
| 3.43499992322177 | 3.07571583388810 |
| 3.43749992316589 | 2.17504016777116 |
| 3.43999992311001 | 3.11606521369643 |
| 3.44249992305413 | 2.19943643887906 |
| 3.44499992299825 | 3.13834932036015 |
| 3.44749992294237 | 2.20756642504909 |
| 3.44999992288649 | 3.12540266020124 |
| 3.45249992283061 | 2.17163904835288 |
| 3.45499992277473 | 3.14567488024955 |
| 3.45749992271885 | 2.11904847970357 |
| 3.45999992266297 | 3.16033802390520 |
| 3.46249992260709 | 2.10996185062029 |
| 3.46499992255121 | 3.15338027191203 |
| 3.46749992249534 | 2.12710343831112 |
| 3.46999992243946 | 3.11422711306995 |
| 3.47249992238358 | 2.12789860599889 |
| 3.47499992232770 | 3.09910947598709 |
| 3.47749992227182 | 2.09774480209462 |
| 3.47999992221594 | 3.10684503027444 |
| 3.48249992216006 | 2.09393442672329 |
| 3.48499992210418 | 3.09687629134811 |
| 3.48749992204830 | 2.12306940729125 |
| 3.48999992199242 | 3.06361194836373 |
| 3.49249992193654 | 2.16107914422887 |
| 3.49499992188066 | 3.03252555273752 |
| 3.49749992182478 | 2.16862227129784 |
| 3.49999992176890 | 3.02616579295054 |
| 3.50249992171302 | 2.16318146113728 |
| 3.50499992165715 | 3.01369118920585 |
| 3.50749992160127 | 2.15406111527714 |
| 3.50999992154539 | 2.99126371595468 |
| 3.51249992148951 | 2.13659821056885 |
| 3.51499992143363 | 2.98113709218093 |
| 3.51749992137775 | 2.10564851494593 |
| 3.51999992132187 | 2.99929707911220 |
| 3.52249992126599 | 2.07729482605094 |



|                  |                  |
|------------------|------------------|
| 3.52499992121011 | 3.01600687685771 |
| 3.52749992115423 | 2.07758345128637 |
| 3.52999992109835 | 3.00351164357091 |
| 3.53249992104247 | 2.08462241722404 |
| 3.53499992098659 | 3.00151536448441 |
| 3.53749992093071 | 2.09081531274118 |
| 3.53999992087483 | 3.04043622108818 |
| 3.54249992081895 | 2.09938643550038 |
| 3.54499992076308 | 3.09575495152394 |
| 3.54749992070720 | 2.13961688970923 |
| 3.54999992065132 | 3.10950164693155 |
| 3.55249992059544 | 2.17285653736780 |
| 3.55499992053956 | 3.11953982050590 |
| 3.55749992048368 | 2.18802791993384 |
| 3.55999992042780 | 3.15137927445571 |
| 3.56249992037192 | 2.19452593582578 |
| 3.56499992031604 | 3.18482873451070 |
| 3.56749992026016 | 2.21799095507398 |
| 3.56999992020428 | 3.17689298547244 |
| 3.57249992014840 | 2.22152697901736 |
| 3.57499992009252 | 3.14558170191620 |
| 3.57749992003664 | 2.18893227112056 |
| 3.57999991998076 | 3.15048832593330 |
| 3.58249991992489 | 2.14284564156031 |
| 3.58499991986901 | 3.16089978918124 |
| 3.58749991981313 | 2.12719336756887 |
| 3.58999991975725 | 3.13930880862189 |
| 3.59249991970137 | 2.12619428400558 |
| 3.59499991964549 | 3.07555776838251 |
| 3.59749991958961 | 2.10110570432570 |
| 3.59999991953373 | 3.05089404552600 |
| 3.60249991947785 | 2.06458450716773 |
| 3.60499991942197 | 3.04380297628312 |
| 3.60749991936609 | 2.07277586617680 |
| 3.60999991931021 | 3.02826969836621 |
| 3.61249991925433 | 2.11428485384302 |
| 3.61499991919845 | 2.98399429297812 |
| 3.61749991914257 | 2.13151282221079 |
| 3.61999991908669 | 2.98739435172342 |
| 3.62249991903082 | 2.11434654180340 |
| 3.62499991897494 | 3.01172592125595 |
| 3.62749991891906 | 2.11558696426902 |
| 3.62999991886318 | 3.02897106040814 |
| 3.63249991880730 | 2.15284476501721 |
| 3.63499991875142 | 3.00269292469427 |
| 3.63749991869554 | 2.17649349768521 |
| 3.63999991863966 | 3.00854693238680 |
| 3.64249991858378 | 2.15781450630702 |
| 3.64499991852790 | 3.05231535924468 |
| 3.64749991847202 | 2.11933457149455 |
| 3.64999991841614 | 3.09173026506097 |
| 3.65249991836026 | 2.11018393971545 |

|                  |                  |
|------------------|------------------|
| 3.65499991830438 | 3.09065649402194 |
| 3.65749991824850 | 2.11671767363269 |
| 3.65999991819263 | 3.09387000522905 |
| 3.66249991813675 | 2.12691192635943 |
| 3.66499991808087 | 3.12599314857870 |
| 3.66749991802499 | 2.13053778523405 |
| 3.66999991796911 | 3.14878361210341 |
| 3.67249991791323 | 2.14087069929410 |
| 3.67499991785735 | 3.13925528145673 |
| 3.67749991780147 | 2.14097589692855 |
| 3.67999991774559 | 3.12682816579757 |
| 3.68249991768971 | 2.14398808359048 |
| 3.68499991763383 | 3.15614528386163 |
| 3.68749991757795 | 2.15648980629031 |
| 3.68999991752207 | 3.16329625496838 |
| 3.69249991746619 | 2.18162569219676 |
| 3.69499991741031 | 3.14970943322396 |
| 3.69749991735443 | 2.18468443860687 |
| 3.69999991729856 | 3.09885750945651 |
| 3.70249991724268 | 2.15734134930961 |
| 3.70499991718680 | 3.10116437469445 |
| 3.70749991713092 | 2.13041755027905 |
| 3.70999991707504 | 3.08629094721366 |
| 3.71249991701916 | 2.13481755707086 |
| 3.71499991696328 | 3.06624325848831 |
| 3.71749991690740 | 2.14251451925815 |
| 3.71999991685152 | 3.01574342479114 |
| 3.72249991679564 | 2.10993530237043 |
| 3.72499991673976 | 3.01782046599164 |
| 3.72749991668388 | 2.06670492446067 |
| 3.72999991662800 | 3.02113489607565 |
| 3.73249991657212 | 2.06818243298723 |
| 3.73499991651624 | 3.00732260848450 |
| 3.73749991646037 | 2.10881104999998 |
| 3.73999991640449 | 2.97827577806992 |
| 3.74249991634861 | 2.12811781809584 |
| 3.74499991629273 | 2.98851538139525 |
| 3.74749991623685 | 2.11462665677821 |
| 3.74999991618097 | 3.03849362524804 |
| 3.75249991612509 | 2.10936522031582 |
| 3.75499991606921 | 3.06020717832911 |
| 3.75749991601333 | 2.13500809131394 |
| 3.75999991595745 | 3.07378975617705 |
| 3.76249991590157 | 2.16000103939975 |
| 3.76499991584569 | 3.08488233966954 |
| 3.76749991578981 | 2.16325131808812 |
| 3.76999991573393 | 3.13877867148418 |
| 3.77249991567805 | 2.16139739108892 |
| 3.77499991562217 | 3.14873842217117 |
| 3.77749991556630 | 2.17008867334448 |
| 3.77999991551042 | 3.14255526817652 |
| 3.78249991545454 | 2.16689340617138 |

|                  |                  |
|------------------|------------------|
| 3.78499991539866 | 3.13917327915408 |
| 3.78749991534278 | 2.14963989108153 |
| 3.78999991528690 | 3.18137361879173 |
| 3.79249991523102 | 2.13730447791722 |
| 3.79499991517514 | 3.19300071982046 |
| 3.79749991511926 | 2.15068706760421 |
| 3.79999991506338 | 3.15909229990926 |
| 3.80249991500750 | 2.15441793279507 |
| 3.80499991495162 | 3.11554018556734 |
| 3.80749991489574 | 2.13878329180074 |
| 3.80999991483986 | 3.11678244413706 |
| 3.81249991478398 | 2.12428950869320 |
| 3.81499991472811 | 3.12452043456336 |
| 3.81749991467223 | 2.14126148695506 |
| 3.81999991461635 | 3.09101820712820 |
| 3.82249991456047 | 2.15062054270692 |
| 3.82499991450459 | 3.04650978902301 |
| 3.82749991444871 | 2.12786713351233 |
| 3.82999991439283 | 3.05243855620388 |
| 3.83249991433695 | 2.10666477447505 |
| 3.83499991428107 | 3.06134534563368 |
| 3.83749991422519 | 2.12410514304212 |
| 3.83999991416931 | 3.03494447270671 |
| 3.84249991411343 | 2.15111634334222 |
| 3.84499991405755 | 2.98374869235648 |
| 3.84749991400167 | 2.13781843761391 |
| 3.84999991394579 | 2.99087693504815 |
| 3.85249991388991 | 2.10371084509825 |
| 3.85499991383404 | 3.03143189733796 |
| 3.85749991377816 | 2.09884774181406 |
| 3.85999991372228 | 3.04937552797765 |
| 3.86249991366640 | 2.12593098392540 |
| 3.86499991361052 | 3.03293932845977 |
| 3.86749991355464 | 2.13078637799992 |
| 3.86999991349876 | 3.05042953134096 |
| 3.87249991344288 | 2.10825212415546 |
| 3.87499991338700 | 3.10109972759149 |
| 3.87749991333112 | 2.11647229638991 |
| 3.87999991327524 | 3.12215034711351 |
| 3.88249991321936 | 2.16260071883855 |
| 3.88499991316348 | 3.10968362271052 |
| 3.88749991310760 | 2.18938581103971 |
| 3.88999991305172 | 3.13057218068023 |
| 3.89249991299585 | 2.16896053165428 |
| 3.89499991293997 | 3.19317415402120 |
| 3.89749991288409 | 2.15320466235911 |
| 3.89999991282821 | 3.22009447398069 |
| 3.90249991277233 | 2.18009005971841 |
| 3.90499991271645 | 3.19404705569611 |
| 3.90749991266057 | 2.21265246577699 |
| 3.90999991260469 | 3.16297858229644 |
| 3.91249991254881 | 2.21259372375816 |

|                  |                  |
|------------------|------------------|
| 3.91499991249293 | 3.17606160547477 |
| 3.91749991243705 | 2.18715212004949 |
| 3.91999991238117 | 3.17666023240148 |
| 3.92249991232529 | 2.17181320877349 |
| 3.92499991226941 | 3.13960790159838 |
| 3.92749991221353 | 2.15442516150132 |
| 3.92999991215765 | 3.09537963307928 |
| 3.93249991210178 | 2.13185129583726 |
| 3.93499991204590 | 3.09585316612949 |
| 3.93749991199002 | 2.11332263884741 |
| 3.93999991193414 | 3.07824717518103 |
| 3.94249991187826 | 2.11484397314530 |
| 3.94499991182238 | 3.04043288181354 |
| 3.94749991176650 | 2.11089345669221 |
| 3.94999991171062 | 2.98296625815932 |
| 3.95249991165474 | 2.09692381752724 |
| 3.95499991159886 | 2.99572358309274 |
| 3.95749991154298 | 2.09140382024945 |
| 3.95999991148710 | 3.01043736781850 |
| 3.96249991143122 | 2.11698120500750 |
| 3.96499991137534 | 3.02515351183390 |
| 3.96749991131946 | 2.14570368780291 |
| 3.96999991126359 | 3.00898297244368 |
| 3.97249991120771 | 2.14566229561597 |
| 3.97499991115183 | 3.03699794149914 |
| 3.97749991109595 | 2.13806419118346 |
| 3.97999991104007 | 3.06814831516894 |
| 3.98249991098419 | 2.16078954512488 |
| 3.98499991092831 | 3.08258922974745 |
| 3.98749991087243 | 2.19499901746265 |
| 3.98999991081655 | 3.08165712262396 |
| 3.99249991076067 | 2.19077933051437 |
| 3.99499991070479 | 3.10683767011426 |
| 3.99749991064891 | 2.15050093289680 |
| 3.99999991059303 | 3.16266178194460 |
| 4.00249991053715 | 2.13219409454885 |
| 4.00499991048127 | 3.17459406663340 |
| 4.00749991042539 | 2.15502799830768 |
| 4.00999991036952 | 3.16964122746298 |
| 4.01249991031364 | 2.17951310398722 |
| 4.01499991025776 | 3.14958023713685 |
| 4.01749991020188 | 2.17050053442380 |
| 4.01999991014600 | 3.18128413902405 |
| 4.02249991009012 | 2.15461992816691 |
| 4.02499991003424 | 3.17482854542698 |
| 4.02749990997836 | 2.16006695815986 |
| 4.02999990992248 | 3.16095153382237 |
| 4.03249990986660 | 2.17203519977578 |
| 4.03499990981072 | 3.13216196066375 |
| 4.03749990975484 | 2.17424349355563 |
| 4.03999990969896 | 3.14470858841594 |
| 4.04249990964308 | 2.17300203895164 |

|                  |                  |
|------------------|------------------|
| 4.04499990958720 | 3.12406608438586 |
| 4.04749990953133 | 2.18167127981761 |
| 4.04999990947545 | 3.07504586060159 |
| 4.05249990941957 | 2.17489884328007 |
| 4.05499990936369 | 3.02861792763845 |
| 4.05749990930781 | 2.15356299597295 |
| 4.05999990925193 | 3.02627341134026 |
| 4.06249990919605 | 2.12587665149486 |
| 4.06499990914017 | 3.03559467640675 |
| 4.06749990908429 | 2.12360775634155 |
| 4.06999990902841 | 3.00919849551106 |
| 4.07249990897253 | 2.11826927451870 |
| 4.07499990891665 | 2.98752298193955 |
| 4.07749990886077 | 2.10133086460200 |
| 4.07999990880489 | 2.99583170682517 |
| 4.08249990874901 | 2.09086960280430 |
| 4.08499990869313 | 3.03160674969330 |
| 4.08749990863726 | 2.11944245826066 |
| 4.08999990858138 | 3.03177936530497 |
| 4.09249990852550 | 2.15268951077019 |
| 4.09499990846962 | 3.03353643523430 |
| 4.09749990841374 | 2.15786631848152 |
| 4.09999990835786 | 3.06828587956615 |
| 4.10249990830198 | 2.15575195961200 |
| 4.10499990824610 | 3.12970893868072 |
| 4.10749990819022 | 2.18332038237955 |
| 4.10999990813434 | 3.14517011808106 |
| 4.11249990807846 | 2.22644660519088 |
| 4.11499990802258 | 3.13696617422184 |
| 4.11749990796670 | 2.23507016134572 |
| 4.11999990791082 | 3.14176528500794 |
| 4.12249990785494 | 2.21044415681804 |
| 4.12499990779907 | 3.18039176327084 |
| 4.12749990774319 | 2.20088458851299 |
| 4.12999990768731 | 3.18751870557743 |
| 4.13249990763143 | 2.21903725463319 |
| 4.13499990757555 | 3.16479164017428 |
| 4.13749990751967 | 2.21885096300675 |
| 4.13999990746379 | 3.15217435440745 |
| 4.14249990740791 | 2.18251058612301 |
| 4.14499990735203 | 3.17304034538059 |
| 4.14749990729615 | 2.15689270859841 |
| 4.14999990724027 | 3.16269423912999 |
| 4.15249990718439 | 2.17367235883470 |
| 4.15499990712851 | 3.11348530128954 |
| 4.15749990707263 | 2.19381883925451 |
| 4.15999990701675 | 3.07688917629105 |
| 4.16249990696087 | 2.19115589847779 |
| 4.16499990690500 | 3.08293663591713 |
| 4.16749990684912 | 2.17367876086279 |
| 4.16999990679324 | 3.08279412006738 |
| 4.17249990673736 | 2.18036367779139 |

|                  |                  |
|------------------|------------------|
| 4.17499990668148 | 3.05074694376787 |
| 4.17749990662560 | 2.19355129943318 |
| 4.17999990656972 | 3.02147489763096 |
| 4.18249990651384 | 2.20675985616763 |
| 4.18499990645796 | 3.01490219365637 |
| 4.18749990640208 | 2.20579529826795 |
| 4.18999990634620 | 3.01749580951656 |
| 4.19249990629032 | 2.20317729283165 |
| 4.19499990623444 | 2.99609841575974 |
| 4.19749990617856 | 2.18152678208680 |
| 4.19999990612268 | 2.98818553948880 |
| 4.20249990606681 | 2.15766188852216 |
| 4.20499990601093 | 3.01759569707491 |
| 4.20749990595505 | 2.14494813413495 |
| 4.20999990589917 | 3.04933611217098 |
| 4.21249990584329 | 2.15350628921998 |
| 4.21499990578741 | 3.05506111931005 |
| 4.21749990573153 | 2.15674291033053 |
| 4.21999990567565 | 3.05135115988508 |
| 4.22249990561977 | 2.13854919927179 |
| 4.22499990556389 | 3.07911969310743 |
| 4.22749990550801 | 2.13203120010215 |
| 4.22999990545213 | 3.11091571744559 |
| 4.23249990539625 | 2.16293222686195 |
| 4.23499990534037 | 3.12237569134353 |
| 4.23749990528449 | 2.20873089215549 |
| 4.23999990522861 | 3.12199621062518 |
| 4.24249990517274 | 2.21486603785534 |
| 4.24499990511686 | 3.14168112209817 |
| 4.24749990506098 | 2.19856974953309 |
| 4.24999990500510 | 3.17343890251790 |
| 4.25249990494922 | 2.20371330574215 |
| 4.25499990489334 | 3.16271421702404 |
| 4.25749990483746 | 2.23632950366823 |
| 4.25999990478158 | 3.13234784782805 |
| 4.26249990472570 | 2.24702474645408 |
| 4.26499990466982 | 3.10884505529127 |
| 4.26749990461394 | 2.22053938978686 |
| 4.26999990455806 | 3.12075466339874 |
| 4.27249990450218 | 2.18080520598425 |
| 4.27499990444630 | 3.10483146810467 |
| 4.27749990439042 | 2.15755779708308 |
| 4.27999990433455 | 3.07944765639619 |
| 4.28249990427867 | 2.13873407769666 |
| 4.28499990422279 | 3.04841283885369 |
| 4.28749990416691 | 2.11717638180360 |
| 4.28999990411103 | 3.04415842465221 |
| 4.29249990405515 | 2.09951385076355 |
| 4.29499990399927 | 3.02668817840920 |
| 4.29749990394339 | 2.10219718752499 |
| 4.29999990388751 | 2.98737581443664 |
| 4.30249990383163 | 2.10112884837794 |



|                  |                  |
|------------------|------------------|
| 4.30499990377575 | 2.96995939130386 |
| 4.30749990371987 | 2.09646227932009 |
| 4.30999990366399 | 2.99746933470303 |
| 4.31249990360811 | 2.09955288645773 |
| 4.31499990355223 | 3.03422849583251 |
| 4.31749990349635 | 2.13187905149284 |
| 4.31999990344048 | 3.01870342692985 |
| 4.32249990338460 | 2.15731770668207 |
| 4.32499990332872 | 3.01606330001179 |
| 4.32749990327284 | 2.16037801826741 |
| 4.32999990321696 | 3.04042500750569 |
| 4.33249990316108 | 2.15735407712156 |
| 4.33499990310520 | 3.08787567665458 |
| 4.33749990304932 | 2.17174744531057 |
| 4.33999990299344 | 3.08649425260246 |
| 4.34249990293756 | 2.17710854506637 |
| 4.34499990288168 | 3.08911936705010 |
| 4.34749990282580 | 2.14750472982529 |
| 4.34999990276992 | 3.11931282092499 |
| 4.35249990271404 | 2.12200624901860 |
| 4.35499990265816 | 3.15909742352100 |
| 4.35749990260229 | 2.13492908672794 |
| 4.35999990254641 | 3.14631623078339 |
| 4.36249990249053 | 2.16492229952255 |
| 4.36499990243465 | 3.10876636336876 |
| 4.36749990237877 | 2.15283750286407 |
| 4.36999990232289 | 3.10924188832278 |
| 4.37249990226701 | 2.12474549714219 |
| 4.37499990221113 | 3.13285186999018 |
| 4.37749990215525 | 2.12404800024058 |
| 4.37999990209937 | 3.12492241862882 |
| 4.38249990204349 | 2.15299929567545 |
| 4.38499990198761 | 3.08237105341408 |
| 4.38749990193173 | 2.15603153320864 |
| 4.38999990187585 | 3.06859156122854 |
| 4.39249990181997 | 2.13164721021655 |
| 4.39499990176409 | 3.07214253742726 |
| 4.39749990170822 | 2.12382996124454 |
| 4.39999990165234 | 3.05719661706505 |
| 4.40249990159646 | 2.14822793991839 |
| 4.40499990154058 | 3.00282310548324 |
| 4.40749990148470 | 2.15323038927375 |
| 4.40999990142882 | 2.99088561221405 |
| 4.41249990137294 | 2.11818617293334 |
| 4.41499990131706 | 3.01703307602834 |
| 4.41749990126118 | 2.08423559513650 |
| 4.41999990120530 | 3.03801010035780 |
| 4.42249990114942 | 2.09664441878946 |
| 4.42499990109354 | 3.00191442106533 |
| 4.42749990103766 | 2.12051195197127 |
| 4.42999990098178 | 2.99303308366430 |
| 4.43249990092590 | 2.12589908308226 |



|                  |                  |
|------------------|------------------|
| 4.43499990087003 | 3.02308385921413 |
| 4.43749990081415 | 2.11969945349193 |
| 4.43999990075827 | 3.05976395283623 |
| 4.44249990070239 | 2.12722735244684 |
| 4.44499990064651 | 3.05026671302052 |
| 4.44749990059063 | 2.13211680890213 |
| 4.44999990053475 | 3.06138243927168 |
| 4.45249990047887 | 2.13215517953478 |
| 4.45499990042299 | 3.10559921634554 |
| 4.45749990036711 | 2.14572801547121 |
| 4.45999990031123 | 3.13456554302777 |
| 4.46249990025535 | 2.17132235793468 |
| 4.46499990019947 | 3.12384111617909 |
| 4.46749990014359 | 2.17624328355219 |
| 4.46999990008771 | 3.09797094433776 |
| 4.47249990003183 | 2.14847882047043 |
| 4.47499989997596 | 3.12960348874470 |
| 4.47749989992008 | 2.13527489295266 |
| 4.47999989986420 | 3.14272713263163 |
| 4.48249989980832 | 2.15080300900594 |
| 4.48499989975244 | 3.13500024341131 |
| 4.48749989969656 | 2.16586826294560 |
| 4.48999989964068 | 3.09057870552523 |
| 4.49249989958480 | 2.13488398876988 |
| 4.49499989952892 | 3.09584120115180 |
| 4.49749989947304 | 2.10209002788225 |
| 4.49999989941716 | 3.08949263176513 |
| 4.50249989936128 | 2.10857595273540 |
| 4.50499989930540 | 3.06470120014024 |
| 4.50749989924952 | 2.14303769464795 |
| 4.50999989919364 | 3.01383380660729 |
| 4.51249989913777 | 2.13813313909237 |
| 4.51499989908189 | 3.01189622122941 |
| 4.51749989902601 | 2.09859592427366 |
| 4.51999989897013 | 3.03625533075119 |
| 4.52249989891425 | 2.08232704457513 |
| 4.52499989885837 | 3.03223994768438 |
| 4.52749989880249 | 2.10997522928517 |
| 4.52999989874661 | 3.00046900506887 |
| 4.53249989869073 | 2.13555684694812 |
| 4.53499989863485 | 2.98808000643373 |
| 4.53749989857897 | 2.12859203917167 |
| 4.53999989852309 | 3.02894312571630 |
| 4.54249989846721 | 2.11655967533401 |
| 4.54499989841133 | 3.03993733316347 |
| 4.54749989835545 | 2.12001311632853 |
| 4.54999989829957 | 3.03514109384144 |
| 4.55249989824370 | 2.12338490294011 |
| 4.55499989818782 | 3.04419669453618 |
| 4.55749989813194 | 2.11622378058702 |
| 4.55999989807606 | 3.09782687922534 |
| 4.56249989802018 | 2.12318994546155 |

|                  |                  |
|------------------|------------------|
| 4.56499989796430 | 3.11969639065807 |
| 4.56749989790842 | 2.14548931050495 |
| 4.56999989785254 | 3.09447023104085 |
| 4.57249989779666 | 2.14862308275230 |
| 4.57499989774078 | 3.08194594388902 |
| 4.57749989768490 | 2.12780456692667 |
| 4.57999989762902 | 3.12667313085986 |
| 4.58249989757314 | 2.12479225527627 |
| 4.58499989751726 | 3.16213040203673 |
| 4.58749989746138 | 2.15298004075398 |
| 4.58999989740551 | 3.13617469851713 |
| 4.59249989734963 | 2.16536355578018 |
| 4.59499989729375 | 3.10298930942873 |
| 4.59749989723787 | 2.13440293416520 |
| 4.59999989718199 | 3.11972750581024 |
| 4.60249989712611 | 2.11818245229890 |
| 4.60499989707023 | 3.13259326685559 |
| 4.60749989701435 | 2.14504707010919 |
| 4.60999989695847 | 3.09178537512389 |
| 4.61249989690259 | 2.17297330056791 |
| 4.61499989684671 | 3.03323249886009 |
| 4.61749989679083 | 2.13875162801364 |
| 4.61999989673495 | 3.04330224652449 |
| 4.62249989667907 | 2.08960477575521 |
| 4.62499989662319 | 3.06866795958051 |
| 4.62749989656731 | 2.08500028781845 |
| 4.62999989651144 | 3.04624783856173 |
| 4.63249989645556 | 2.11775954353132 |
| 4.63499989639968 | 2.98505110621343 |
| 4.63749989634380 | 2.11759919608268 |
| 4.63999989628792 | 2.98270302999159 |
| 4.64249989623204 | 2.08487025497727 |
| 4.64499989617616 | 3.02266694067689 |
| 4.64749989612028 | 2.08168633485211 |
| 4.64999989606440 | 3.03245787195222 |
| 4.65249989600852 | 2.11095379311841 |
| 4.65499989595264 | 3.01070366429660 |
| 4.65749989589676 | 2.12772252679949 |
| 4.65999989584088 | 3.03407866360053 |
| 4.66249989578500 | 2.11002193651962 |
| 4.66499989572912 | 3.09330331933243 |
| 4.66749989567325 | 2.11870225408975 |
| 4.66999989561737 | 3.11771714686259 |
| 4.67249989556149 | 2.15788536469225 |
| 4.67499989550561 | 3.08460824164463 |
| 4.67749989544973 | 2.18459594847697 |
| 4.67999989539385 | 3.08425363024817 |
| 4.68249989533797 | 2.16096156629335 |
| 4.68499989528209 | 3.13657311083641 |
| 4.68749989522621 | 2.13379767499288 |
| 4.68999989517033 | 3.17685465027155 |
| 4.69249989511445 | 2.13816645098575 |

|                  |                  |
|------------------|------------------|
| 4.69499989505857 | 3.14507671948189 |
| 4.69749989500269 | 2.15013657662275 |
| 4.69999989494681 | 3.11368662590265 |
| 4.70249989489093 | 2.13532835586216 |
| 4.70499989483505 | 3.12299545498949 |
| 4.70749989477918 | 2.12068404748916 |
| 4.70999989472330 | 3.13388438549797 |
| 4.71249989466742 | 2.12777795776745 |
| 4.71499989461154 | 3.09604136183014 |
| 4.71749989455566 | 2.13313108581962 |
| 4.71999989449978 | 3.04571922199060 |
| 4.72249989444390 | 2.11121966749128 |
| 4.72499989438802 | 3.06300235049436 |
| 4.72749989433214 | 2.09698545579649 |
| 4.72999989427626 | 3.07186385014929 |
| 4.73249989422038 | 2.11692077854274 |
| 4.73499989416450 | 3.05408390406501 |
| 4.73749989410862 | 2.14340622356776 |
| 4.73999989405274 | 2.98987797862639 |
| 4.74249989399686 | 2.13352530237211 |
| 4.74499989394099 | 2.99305261716563 |
| 4.74749989388511 | 2.10945090116694 |
| 4.74999989382923 | 3.00611040894692 |
| 4.75249989377335 | 2.11219830998725 |
| 4.75499989371747 | 3.01891492868564 |
| 4.75749989366159 | 2.12343045740707 |
| 4.75999989360571 | 2.99850054126708 |
| 4.76249989354983 | 2.10708614523161 |
| 4.76499989349395 | 3.02469938842143 |
| 4.76749989343807 | 2.07393079347239 |
| 4.76999989338219 | 3.06129677846856 |
| 4.77249989332631 | 2.08627641002001 |
| 4.77499989327043 | 3.07356069622775 |
| 4.77749989321455 | 2.12967577647726 |
| 4.77999989315867 | 3.06068793171829 |
| 4.78249989310279 | 2.15860581838788 |
| 4.78499989304692 | 3.07455141223447 |
| 4.78749989299104 | 2.13736582499206 |
| 4.78999989293516 | 3.13765417358175 |
| 4.79249989287928 | 2.12746254695141 |
| 4.79499989282340 | 3.16421546459087 |
| 4.79749989276752 | 2.14973930327145 |
| 4.79999989271164 | 3.15922322716360 |
| 4.80249989265576 | 2.18331056272922 |
| 4.80499989259988 | 3.13161920704513 |
| 4.80749989254400 | 2.18232991495924 |
| 4.80999989248812 | 3.15284463132787 |
| 4.81249989243224 | 2.16834504283566 |
| 4.81499989237636 | 3.14510398895903 |
| 4.81749989232048 | 2.15479907606278 |
| 4.81999989226460 | 3.10854035136445 |
| 4.82249989220873 | 2.13722010659876 |

|                  |                  |
|------------------|------------------|
| 4.82499989215285 | 3.07120705472278 |
| 4.82749989209697 | 2.10599953336866 |
| 4.82999989204109 | 3.08734410890218 |
| 4.83249989198521 | 2.08676711602469 |
| 4.83499989192933 | 3.08458812379562 |
| 4.83749989187345 | 2.09583590931041 |
| 4.83999989181757 | 3.03666190779464 |
| 4.84249989176169 | 2.10103605658851 |
| 4.84499989170581 | 2.98314636226284 |
| 4.84749989164993 | 2.09016115998193 |
| 4.84999989159405 | 2.99285379080252 |
| 4.85249989153817 | 2.09026431116665 |
| 4.85499989148229 | 3.01770740687910 |
| 4.85749989142641 | 2.12628926735875 |
| 4.85999989137053 | 3.00831040116358 |
| 4.86249989131466 | 2.14604353742043 |
| 4.86499989125878 | 2.99721595224402 |
| 4.86749989120290 | 2.12647724310372 |
| 4.86999989114702 | 3.03132694075779 |
| 4.87249989109114 | 2.10827766153180 |
| 4.87499989103526 | 3.06840180715955 |
| 4.87749989097938 | 2.13772560495378 |
| 4.87999989092350 | 3.05904475374601 |
| 4.88249989086762 | 2.16625686571653 |
| 4.88499989081174 | 3.04063937904448 |
| 4.88749989075586 | 2.14514587010348 |
| 4.88999989069998 | 3.07154309550851 |
| 4.89249989064410 | 2.09252498128863 |
| 4.89499989058822 | 3.13130004080669 |
| 4.89749989053234 | 2.08777783221635 |
| 4.89999989047647 | 3.14238547815780 |
| 4.90249989042059 | 2.12384716039385 |
| 4.90499989036471 | 3.12267492267591 |
| 4.90749989030883 | 2.14657660534769 |
| 4.90999989025295 | 3.12203376105721 |
| 4.91249989019707 | 2.13047895691767 |
| 4.91499989014119 | 3.15467576296202 |
| 4.91749989008531 | 2.13538502958061 |
| 4.91999989002943 | 3.14931165273382 |
| 4.92249988997355 | 2.16111890249056 |
| 4.92499988991767 | 3.11442048378667 |
| 4.92749988986179 | 2.17420912962691 |
| 4.92999988980591 | 3.10391880735724 |
| 4.93249988975003 | 2.15136214612743 |
| 4.93499988969415 | 3.12169613069177 |
| 4.93749988963827 | 2.13168291772135 |
| 4.93999988958240 | 3.11256102683835 |
| 4.94249988952652 | 2.13473531907401 |
| 4.94499988947064 | 3.05193077102561 |
| 4.94749988941476 | 2.13108132515069 |
| 4.94999988935888 | 3.01386203997645 |
| 4.95249988930300 | 2.10851289676445 |

|                  |                  |
|------------------|------------------|
| 4.95499988924712 | 3.01270636174603 |
| 4.95749988919124 | 2.08010649546868 |
| 4.95999988913536 | 3.02425194399243 |
| 4.96249988907948 | 2.07908821195855 |
| 4.96499988902360 | 2.99703590610139 |
| 4.96749988896772 | 2.07751693677091 |
| 4.96999988891184 | 2.98852597935537 |
| 4.97249988885596 | 2.08034517085603 |
| 4.97499988880008 | 3.01045578761107 |
| 4.97749988874421 | 2.09578666151877 |
| 4.97999988868833 | 3.03585496985841 |
| 4.98249988863245 | 2.13950119686459 |
| 4.98499988857657 | 3.03419283853779 |
| 4.98749988852069 | 2.16040512528276 |
| 4.98999988846481 | 3.02920942214648 |
| 4.99249988840893 | 2.15166203545538 |
| 4.99499988835305 | 3.07520943203418 |
| 4.99749988829717 | 2.13542040619289 |
| 4.99999988824129 | 3.11465878774048 |
| 5.00249988818541 | 2.15057478457109 |
| 5.00499988812953 | 3.13151232605286 |
| 5.00749988807365 | 2.16660194192519 |
| 5.00999988801777 | 3.10913291305679 |
| 5.01249988796189 | 2.14347164046203 |
| 5.01499988790601 | 3.12709643314145 |
| 5.01749988785014 | 2.10358695010142 |
| 5.01999988779426 | 3.14017006281348 |
| 5.02249988773838 | 2.10508464643800 |
| 5.02499988768250 | 3.14022515214514 |
| 5.02749988762662 | 2.13296230777902 |
| 5.02999988757074 | 3.10739188319932 |
| 5.03249988751486 | 2.13086750232857 |
| 5.03499988745898 | 3.11573046071238 |
| 5.03749988740310 | 2.10036846218515 |
| 5.03999988734722 | 3.13407115791218 |
| 5.04249988729134 | 2.10357566901835 |
| 5.04499988723546 | 3.11940702897297 |
| 5.04749988717958 | 2.14566704162365 |
| 5.04999988712370 | 3.07069508805873 |
| 5.05249988706782 | 2.17401195086182 |
| 5.05499988701195 | 3.04371181523186 |
| 5.05749988695607 | 2.16328189385711 |
| 5.05999988690019 | 3.05740616275316 |
| 5.06249988684431 | 2.13667869840531 |
| 5.06499988678843 | 3.04382096046417 |
| 5.06749988673255 | 2.12439438222050 |
| 5.06999988667667 | 3.01799098134736 |
| 5.07249988662079 | 2.10882376143337 |
| 5.07499988656491 | 2.99911801654436 |
| 5.07749988650903 | 2.09632252479431 |
| 5.07999988645315 | 3.01845185111673 |
| 5.08249988639727 | 2.08780569783325 |

|                  |                  |
|------------------|------------------|
| 5.08499988634139 | 3.01211723867083 |
| 5.08749988628551 | 2.09100305366037 |
| 5.08999988622963 | 2.99043000147153 |
| 5.09249988617375 | 2.07618714316894 |
| 5.09499988611788 | 2.99178925461955 |
| 5.09749988606200 | 2.07448526660495 |
| 5.09999988600612 | 3.05038010605678 |
| 5.10249988595024 | 2.09799736523810 |
| 5.10499988589436 | 3.08613156289375 |
| 5.10749988583848 | 2.14789339806914 |
| 5.10999988578260 | 3.09111051719297 |
| 5.11249988572672 | 2.16834698856295 |
| 5.11499988567084 | 3.09427755533485 |
| 5.11749988561496 | 2.15866687904734 |
| 5.11999988555908 | 3.14054219344447 |
| 5.12249988550320 | 2.15944028576018 |
| 5.12499988544732 | 3.16372731180344 |
| 5.12749988539144 | 2.19348446844672 |
| 5.12999988533556 | 3.14864162510328 |
| 5.13249988527969 | 2.20761417283954 |
| 5.13499988522381 | 3.12867396349348 |
| 5.13749988516793 | 2.15747579313558 |
| 5.13999988511205 | 3.15524880660448 |
| 5.14249988505617 | 2.10216908793370 |
| 5.14499988500029 | 3.16911817031883 |
| 5.14749988494441 | 2.10089074948413 |
| 5.14999988488853 | 3.12555626081087 |
| 5.15249988483265 | 2.13214085109826 |
| 5.15499988477677 | 3.06833297063503 |
| 5.15749988472089 | 2.11997092983678 |
| 5.15999988466501 | 3.05939370676234 |
| 5.16249988460913 | 2.08332252120069 |
| 5.16499988455325 | 3.07786184133921 |
| 5.16749988449737 | 2.07611602866169 |
| 5.16999988444149 | 3.04849230941772 |
| 5.17249988438562 | 2.10864080693939 |
| 5.17499988432974 | 3.01365372808523 |
| 5.17749988427386 | 2.12670215374815 |
| 5.17999988421798 | 3.00578659628757 |
| 5.18249988416210 | 2.12701097402928 |
| 5.18499988410622 | 3.03492588415829 |
| 5.18749988405034 | 2.13208627017881 |
| 5.18999988399446 | 3.01855802259191 |
| 5.19249988393858 | 2.14905511624481 |
| 5.19499988388270 | 2.98562802806830 |
| 5.19749988382682 | 2.13568185525396 |
| 5.19999988377094 | 2.99774579429861 |
| 5.20249988371506 | 2.10483282586052 |
| 5.20499988365918 | 3.05573697173513 |
| 5.20749988360330 | 2.08875015845194 |
| 5.20999988354743 | 3.08180824432329 |
| 5.21249988349155 | 2.10793919141160 |



|                  |                  |
|------------------|------------------|
| 5.21499988343567 | 3.05283144190455 |
| 5.21749988337979 | 2.11079001630906 |
| 5.21999988332391 | 3.05510957757083 |
| 5.22249988326803 | 2.09637178471830 |
| 5.22499988321215 | 3.10256631203750 |
| 5.22749988315627 | 2.10140313085353 |
| 5.22999988310039 | 3.14600524185164 |
| 5.23249988304451 | 2.14502264420565 |
| 5.23499988298863 | 3.12878248057435 |
| 5.23749988293275 | 2.17035625710988 |
| 5.23999988287687 | 3.12361849492764 |
| 5.24249988282099 | 2.15107139687575 |
| 5.24499988276511 | 3.16455261800053 |
| 5.24749988270923 | 2.14305741753808 |
| 5.24999988265336 | 3.18846921231082 |
| 5.25249988259748 | 2.17506308735747 |
| 5.25499988254160 | 3.15351797984029 |
| 5.25749988248572 | 2.20567207405815 |
| 5.25999988242984 | 3.09136872899239 |
| 5.26249988237396 | 2.17044289694200 |
| 5.26499988231808 | 3.09574321305708 |
| 5.26749988226220 | 2.11559520758225 |
| 5.26999988220632 | 3.10743819325309 |
| 5.27249988215044 | 2.09223363499682 |
| 5.27499988209456 | 3.08581704161993 |
| 5.27749988203868 | 2.10403536453597 |
| 5.27999988198280 | 3.01910003360240 |
| 5.28249988192692 | 2.08746683384647 |
| 5.28499988187104 | 3.00500402501794 |
| 5.28749988181517 | 2.05546909645803 |
| 5.28999988175929 | 3.01634265909313 |
| 5.29249988170341 | 2.06058272321739 |
| 5.29499988164753 | 3.00731653239645 |
| 5.29749988159165 | 2.10460579945081 |
| 5.29999988153577 | 2.96881715540095 |
| 5.30249988147989 | 2.12534935553311 |
| 5.30499988142401 | 2.98941560550051 |
| 5.30749988136813 | 2.11124952887999 |
| 5.30999988131225 | 3.05238049607270 |
| 5.31249988125637 | 2.11427627626524 |
| 5.31499988120049 | 3.07693743216481 |
| 5.31749988114461 | 2.15149991189519 |
| 5.31999988108873 | 3.05510620509877 |
| 5.32249988103285 | 2.17547579774265 |
| 5.32499988097697 | 3.05572926224919 |
| 5.32749988092110 | 2.16039917685621 |
| 5.32999988086522 | 3.11130236942297 |
| 5.33249988080934 | 2.13541395834414 |
| 5.33499988075346 | 3.13709300213717 |
| 5.33749988069758 | 2.12813822936199 |
| 5.33999988064170 | 3.12058664808318 |
| 5.34249988058582 | 2.11807251371500 |



|                  |                  |
|------------------|------------------|
| 5.34499988052994 | 3.11448730573509 |
| 5.34749988047406 | 2.10027432712539 |
| 5.34999988041818 | 3.15399654192233 |
| 5.35249988036230 | 2.10590780958616 |
| 5.35499988030642 | 3.15724829714199 |
| 5.35749988025054 | 2.13566383099050 |
| 5.35999988019466 | 3.11745964458820 |
| 5.36249988013878 | 2.14486456971157 |
| 5.36499988008291 | 3.07743943315445 |
| 5.36749988002703 | 2.12447726982922 |
| 5.36999987997115 | 3.10943081128894 |
| 5.37249987991527 | 2.12204311977514 |
| 5.37499987985939 | 3.11395432595053 |
| 5.37749987980351 | 2.14591035101749 |
| 5.37999987974763 | 3.08598857378977 |
| 5.38249987969175 | 2.15704194013584 |
| 5.38499987963587 | 3.03497138360957 |
| 5.38749987957999 | 2.12289128827149 |
| 5.38999987952411 | 3.04006217318857 |
| 5.39249987946823 | 2.09598356525141 |
| 5.39499987941235 | 3.03546538343398 |
| 5.39749987935647 | 2.10300871894840 |
| 5.39999987930059 | 3.00462273019659 |
| 5.40249987924471 | 2.11729149990336 |
| 5.40499987918884 | 2.96942339321391 |
| 5.40749987913296 | 2.08394498630458 |
| 5.40999987907708 | 2.99514640912293 |
| 5.41249987902120 | 2.04315786858015 |
| 5.41499987896532 | 3.04356583422176 |
| 5.41749987890944 | 2.05906725501233 |
| 5.41999987885356 | 3.03564762878319 |
| 5.42249987879768 | 2.11836155976878 |
| 5.42499987874180 | 3.01648798603857 |
| 5.42749987868592 | 2.15218935745557 |
| 5.42999987863004 | 3.02864888904789 |
| 5.43249987857416 | 2.14154735498914 |
| 5.43499987851828 | 3.09942327198481 |
| 5.43749987846240 | 2.13727554459620 |
| 5.43999987840652 | 3.11375758556137 |
| 5.44249987835065 | 2.15304506423344 |
| 5.44499987829477 | 3.11461192853733 |
| 5.44749987823889 | 2.16157959820729 |
| 5.44999987818301 | 3.11651539019415 |
| 5.45249987812713 | 2.14147920015722 |
| 5.45499987807125 | 3.16336307897039 |
| 5.45749987801537 | 2.13001085799040 |
| 5.45999987795949 | 3.16303370052233 |
| 5.46249987790361 | 2.13616243165612 |
| 5.46499987784773 | 3.11277962219846 |
| 5.46749987779185 | 2.13089034558632 |
| 5.46999987773597 | 3.08270098869644 |
| 5.47249987768009 | 2.10094241014598 |

|                  |                  |
|------------------|------------------|
| 5.47499987762421 | 3.10986596812322 |
| 5.47749987756833 | 2.08779121409422 |
| 5.47999987751245 | 3.13065010240765 |
| 5.48249987745658 | 2.10966832533529 |
| 5.48499987740070 | 3.08349462561247 |
| 5.48749987734482 | 2.12677100805470 |
| 5.48999987728894 | 3.03614689848844 |
| 5.49249987723306 | 2.11343129860755 |
| 5.49499987717718 | 3.03196232053781 |
| 5.49749987712130 | 2.11073820824895 |
| 5.49999987706542 | 3.04698610916345 |
| 5.50249987700954 | 2.13516017390616 |
| 5.50499987695366 | 3.01350935351361 |
| 5.50749987689778 | 2.14681150828968 |
| 5.50999987684190 | 2.97812558399222 |
| 5.51249987678602 | 2.10527456118602 |
| 5.51499987673014 | 3.00166649671228 |
| 5.51749987667426 | 2.06206287475867 |
| 5.51999987661839 | 3.04593525176718 |
| 5.52249987656251 | 2.07529071363893 |
| 5.52499987650663 | 3.03592211792727 |
| 5.52749987645075 | 2.12202895424473 |
| 5.52999987639487 | 2.99708425596646 |
| 5.53249987633899 | 2.13047785296867 |
| 5.53499987628311 | 3.00604681218690 |
| 5.53749987622723 | 2.09724398250895 |
| 5.53999987617135 | 3.06454783263698 |
| 5.54249987611547 | 2.09388395374099 |
| 5.54499987605959 | 3.09600391134927 |
| 5.54749987600371 | 2.12781159274782 |
| 5.54999987594783 | 3.08966371633063 |
| 5.55249987589195 | 2.15743024090004 |
| 5.55499987583607 | 3.09268777214739 |
| 5.55749987578019 | 2.13899831197643 |
| 5.55999987572432 | 3.13658021904207 |
| 5.56249987566844 | 2.12697419111751 |
| 5.56499987561256 | 3.15298338339437 |
| 5.56749987555668 | 2.14255650321223 |
| 5.56999987550080 | 3.12095700161938 |
| 5.57249987544492 | 2.16443587818466 |
| 5.57499987538904 | 3.09703841348489 |
| 5.57749987533316 | 2.14423208437077 |
| 5.57999987527728 | 3.12517054754969 |
| 5.58249987522140 | 2.10775094695009 |
| 5.58499987516552 | 3.14735341835279 |
| 5.58749987510964 | 2.10006879169160 |
| 5.58999987505376 | 3.11537745013441 |
| 5.59249987499788 | 2.11912375053016 |
| 5.59499987494200 | 3.06391042811813 |
| 5.59749987488613 | 2.13105501454514 |
| 5.59999987483025 | 3.04577768011702 |
| 5.60249987477437 | 2.12877250022777 |

|                  |                  |
|------------------|------------------|
| 5.60499987471849 | 3.04675968149918 |
| 5.60749987466261 | 2.12690128759423 |
| 5.60999987460673 | 3.02110620401485 |
| 5.61249987455085 | 2.11753547727352 |
| 5.61499987449497 | 2.98464997821118 |
| 5.61749987443909 | 2.09684563470681 |
| 5.61999987438321 | 2.99447794644960 |
| 5.62249987432733 | 2.07968909083473 |
| 5.62499987427145 | 3.01463900883273 |
| 5.62749987421557 | 2.09190762607769 |
| 5.62999987415969 | 3.00967758880515 |
| 5.63249987410381 | 2.10876773827394 |
| 5.63499987404794 | 2.98192448379834 |
| 5.63749987399206 | 2.10381041086144 |
| 5.63999987393618 | 2.99342505911573 |
| 5.64249987388030 | 2.08639995641751 |
| 5.64499987382442 | 3.03648585409450 |
| 5.64749987376854 | 2.10180783378548 |
| 5.64999987371266 | 3.06987237538680 |
| 5.65249987365678 | 2.13288495841993 |
| 5.65499987360090 | 3.08591987096376 |
| 5.65749987354502 | 2.14628032960515 |
| 5.65999987348914 | 3.10043899642389 |
| 5.66249987343326 | 2.13234127162868 |
| 5.66499987337738 | 3.13679579352354 |
| 5.66749987332150 | 2.13937573725258 |
| 5.66999987326562 | 3.14474225559775 |
| 5.67249987320974 | 2.16475043551976 |
| 5.67499987315387 | 3.14112394909481 |
| 5.67749987309799 | 2.18218931345862 |
| 5.67999987304211 | 3.12536385642280 |
| 5.68249987298623 | 2.15211141151823 |
| 5.68499987293035 | 3.15132865972228 |
| 5.68749987287447 | 2.11518191528672 |
| 5.68999987281859 | 3.15648645420648 |
| 5.69249987276271 | 2.10963757680176 |
| 5.69499987270683 | 3.13397417225126 |
| 5.69749987265095 | 2.13161098851057 |
| 5.69999987259507 | 3.08331305365268 |
| 5.70249987253919 | 2.13751255507471 |
| 5.70499987248331 | 3.05972687986853 |
| 5.70749987242743 | 2.11903060752411 |
| 5.70999987237155 | 3.05099379325950 |
| 5.71249987231568 | 2.10260604140933 |
| 5.71499987225980 | 3.02282534400782 |
| 5.71749987220392 | 2.09402958564319 |
| 5.71999987214804 | 3.00445624045533 |
| 5.72249987209216 | 2.09410322507894 |
| 5.72499987203628 | 2.99884402167052 |
| 5.72749987198040 | 2.09277121569129 |
| 5.72999987192452 | 3.01940453816990 |
| 5.73249987186864 | 2.10762040709493 |

|                  |                  |
|------------------|------------------|
| 5.73499987181276 | 2.99607630827621 |
| 5.73749987175688 | 2.11752331946616 |
| 5.73999987170100 | 2.97654900312862 |
| 5.74249987164512 | 2.11896519393335 |
| 5.74499987158924 | 2.98320101605457 |
| 5.74749987153336 | 2.10827982959212 |
| 5.74999987147748 | 3.04016294183683 |
| 5.75249987142161 | 2.12080121585216 |
| 5.75499987136573 | 3.06316320603131 |
| 5.75749987130985 | 2.13391857170558 |
| 5.75999987125397 | 3.07034851277652 |
| 5.76249987119809 | 2.12622735613245 |
| 5.76499987114221 | 3.08471102718845 |
| 5.76749987108633 | 2.11073269173005 |
| 5.76999987103045 | 3.12161838789385 |
| 5.77249987097457 | 2.13281815370861 |
| 5.77499987091869 | 3.13405142416601 |
| 5.77749987086281 | 2.16655818560153 |
| 5.77999987080693 | 3.11795208933733 |
| 5.78249987075105 | 2.16380046687743 |
| 5.78499987069517 | 3.12577822274790 |
| 5.78749987063929 | 2.12192691816471 |
| 5.78999987058342 | 3.16310465548723 |
| 5.79249987052754 | 2.10818989207377 |
| 5.79499987047166 | 3.18044026997993 |
| 5.79749987041578 | 2.14015906085389 |
| 5.79999987035990 | 3.13487956939178 |
| 5.80249987030402 | 2.17114569071193 |
| 5.80499987024814 | 3.09950475193990 |
| 5.80749987019226 | 2.15588686000843 |
| 5.80999987013638 | 3.08551209384553 |
| 5.81249987008050 | 2.12796776014041 |
| 5.81499987002462 | 3.08569095812607 |
| 5.81749986996874 | 2.12189542553209 |
| 5.81999986991286 | 3.04563502281856 |
| 5.82249986985698 | 2.12085771095258 |
| 5.82499986980110 | 3.02380963493438 |
| 5.82749986974522 | 2.10358596193785 |
| 5.82999986968935 | 3.01005560519669 |
| 5.83249986963347 | 2.07814955422799 |
| 5.83499986957759 | 3.01539839443132 |
| 5.83749986952171 | 2.08200018787079 |
| 5.83999986946583 | 2.97991227259478 |
| 5.84249986940995 | 2.09516345786910 |
| 5.84499986935407 | 2.95971129564372 |
| 5.84749986929819 | 2.10301597683446 |
| 5.84999986924231 | 2.98243666129794 |
| 5.85249986918643 | 2.09135630317003 |
| 5.85499986913055 | 3.03263312568946 |
| 5.85749986907467 | 2.10042777992294 |
| 5.85999986901879 | 3.05648366052004 |
| 5.86249986896291 | 2.12263308369676 |

|                  |                  |
|------------------|------------------|
| 5.86499986890703 | 3.05915091481100 |
| 5.86749986885116 | 2.14719627716937 |
| 5.86999986879528 | 3.08605128097282 |
| 5.87249986873940 | 2.16258756321981 |
| 5.87499986868352 | 3.10851251817843 |
| 5.87749986862764 | 2.17975091234641 |
| 5.87999986857176 | 3.12906179119844 |
| 5.88249986851588 | 2.17921414919737 |
| 5.88499986846000 | 3.11591747938436 |
| 5.88749986840412 | 2.15614687226682 |
| 5.88999986834824 | 3.14326338592839 |
| 5.89249986829236 | 2.12927838813951 |
| 5.89499986823648 | 3.15513786295892 |
| 5.89749986818060 | 2.12505426001738 |
| 5.89999986812472 | 3.15844568828419 |
| 5.90249986806884 | 2.13297736024483 |
| 5.90499986801296 | 3.11538577859452 |
| 5.90749986795709 | 2.12151814726153 |
| 5.90999986790121 | 3.09690809058196 |
| 5.91249986784533 | 2.09817585614100 |
| 5.91499986778945 | 3.08991564634910 |
| 5.91749986773357 | 2.09635882223822 |
| 5.91999986767769 | 3.08014582292771 |
| 5.92249986762181 | 2.11777714659711 |
| 5.92499986756593 | 3.06019083025651 |
| 5.92749986751005 | 2.12716926580468 |
| 5.92999986745417 | 3.04663315574193 |
| 5.93249986739829 | 2.11934807306870 |
| 5.93499986734241 | 3.04540889849278 |
| 5.93749986728653 | 2.12205230639115 |
| 5.93999986723065 | 3.02387860312695 |
| 5.94249986717477 | 2.14608012136500 |
| 5.94499986711890 | 2.99860873136543 |
| 5.94749986706302 | 2.15488420075558 |
| 5.94999986700714 | 2.97670331674388 |
| 5.95249986695126 | 2.12944609989218 |
| 5.95499986689538 | 3.00329107444500 |
| 5.95749986683950 | 2.08609790767620 |
| 5.95999986678362 | 3.02217050486385 |
| 5.96249986672774 | 2.07478208967737 |
| 5.96499986667186 | 3.02940974864775 |
| 5.96749986661598 | 2.08717089375331 |
| 5.96999986656010 | 3.02028538763293 |
| 5.97249986650422 | 2.10199729797662 |
| 5.97499986644834 | 3.04934818367418 |
| 5.97749986639246 | 2.10555373582557 |
| 5.97999986633658 | 3.08107397553402 |
| 5.98249986628070 | 2.12070253302390 |
| 5.98499986622483 | 3.09144643445443 |
| 5.98749986616895 | 2.13433786444438 |
| 5.98999986611307 | 3.10299733893376 |
| 5.99249986605719 | 2.14936457951717 |



|                  |                  |
|------------------|------------------|
| 5.99499986600131 | 3.13936573191927 |
| 5.99749986594543 | 2.16531278306253 |
| 5.99999986588955 | 3.17346457098531 |
| 6.00249986583367 | 2.18983411031863 |
| 6.00499986577779 | 3.16502223450436 |
| 6.00749986572191 | 2.19729143062863 |
| 6.00999986566603 | 3.12633269496338 |
| 6.01249986561015 | 2.17521655699289 |
| 6.01499986555427 | 3.11550649546843 |
| 6.01749986549839 | 2.14401982451026 |
| 6.01999986544251 | 3.12746046733560 |
| 6.02249986538664 | 2.13175953282306 |
| 6.02499986533076 | 3.11217914736588 |
| 6.02749986527488 | 2.12590749470479 |
| 6.02999986521900 | 3.06477960739936 |
| 6.03249986516312 | 2.08644668645667 |
| 6.03499986510724 | 3.04936038344224 |
| 6.03749986505136 | 2.04648691126696 |
| 6.03999986499548 | 3.05142881197776 |
| 6.04249986493960 | 2.06100944124451 |
| 6.04499986488372 | 3.03232363391542 |
| 6.04749986482784 | 2.12095715209266 |
| 6.04999986477196 | 2.98647863104108 |
| 6.05249986471608 | 2.14750019534272 |
| 6.05499986466020 | 2.98289360452162 |
| 6.05749986460432 | 2.12890270858017 |
| 6.05999986454844 | 3.02049432365449 |
| 6.06249986449257 | 2.11632340167116 |
| 6.06499986443669 | 3.05004319918276 |
| 6.06749986438081 | 2.14557933638773 |
| 6.06999986432493 | 3.03172876922887 |
| 6.07249986426905 | 2.17328214321749 |
| 6.07499986421317 | 3.01815704323234 |
| 6.07749986415729 | 2.15900572475665 |
| 6.07999986410141 | 3.04583781878451 |
| 6.08249986404553 | 2.12044914102201 |
| 6.08499986398965 | 3.06936077006435 |
| 6.08749986393377 | 2.10355051354347 |
| 6.08999986387789 | 3.06074962159632 |
| 6.09249986382201 | 2.09893178515025 |
| 6.09499986376613 | 3.06857020509455 |
| 6.09749986371025 | 2.09159886230630 |
| 6.09999986365438 | 3.11235446061997 |
| 6.10249986359850 | 2.08765403145181 |
| 6.10499986354262 | 3.14278412655244 |
| 6.10749986348674 | 2.11126291341225 |
| 6.10999986343086 | 3.13309442772652 |
| 6.11249986337498 | 2.14459393679316 |
| 6.11499986331910 | 3.11057804831787 |
| 6.11749986326322 | 2.17104802664566 |
| 6.11999986320734 | 3.12978082037017 |
| 6.12249986315146 | 2.18709513759713 |

|                  |                  |
|------------------|------------------|
| 6.12499986309558 | 3.14535873608290 |
| 6.12749986303970 | 2.19912780460004 |
| 6.12999986298382 | 3.14590658024932 |
| 6.13249986292794 | 2.19651689017886 |
| 6.13499986287206 | 3.10355702877795 |
| 6.13749986281618 | 2.16640481398491 |
| 6.13999986276031 | 3.10274661226179 |
| 6.14249986270443 | 2.13502831555767 |
| 6.14499986264855 | 3.07719700701499 |
| 6.14749986259267 | 2.12133351572566 |
| 6.14999986253679 | 3.05031202609077 |
| 6.15249986248091 | 2.11397290262813 |
| 6.15499986242503 | 2.99129519983802 |
| 6.15749986236915 | 2.07469990517786 |
| 6.15999986231327 | 2.98247373594236 |
| 6.16249986225739 | 2.03196356985897 |
| 6.16499986220151 | 2.99853328289365 |
| 6.16749986214563 | 2.03297774285726 |
| 6.16999986208975 | 3.01007785656601 |
| 6.17249986203387 | 2.08623483365440 |
| 6.17499986197799 | 2.99982891849002 |
| 6.17749986192212 | 2.13324817380491 |
| 6.17999986186624 | 2.99662054305196 |
| 6.18249986181036 | 2.15172247161501 |
| 6.18499986175448 | 3.03948435966662 |
| 6.18749986169860 | 2.16574734559528 |
| 6.18999986164272 | 3.05729340234005 |
| 6.19249986158684 | 2.18889444084382 |
| 6.19499986153096 | 3.07941367670438 |
| 6.19749986147508 | 2.19417300994908 |
| 6.19999986141920 | 3.08594117750776 |
| 6.20249986136332 | 2.16470559750628 |
| 6.20499986130744 | 3.14215748259727 |
| 6.20749986125156 | 2.13244454381773 |
| 6.20999986119568 | 3.14136927145313 |
| 6.21249986113980 | 2.12298541523888 |
| 6.21499986108392 | 3.12900191958171 |
| 6.21749986102805 | 2.12063871907522 |
| 6.21999986097217 | 3.09923772949495 |
| 6.22249986091629 | 2.10250156224460 |
| 6.22499986086041 | 3.12393479348513 |
| 6.22749986080453 | 2.08048749136470 |
| 6.22999986074865 | 3.14144474231412 |
| 6.23249986069277 | 2.08956475561826 |
| 6.23499986063689 | 3.13002102591245 |
| 6.23749986058101 | 2.11826263678752 |
| 6.23999986052513 | 3.10393654520852 |
| 6.24249986046925 | 2.14434663116228 |
| 6.24499986041337 | 3.09921427033159 |
| 6.24749986035749 | 2.16635809673124 |
| 6.24999986030161 | 3.10335625715821 |
| 6.25249986024573 | 2.19383309459858 |



|                  |                  |
|------------------|------------------|
| 6.25499986018986 | 3.06576205563478 |
| 6.25749986013398 | 2.20117084224328 |
| 6.25999986007810 | 3.02672482428284 |
| 6.26249986002222 | 2.17153286869046 |
| 6.26499985996634 | 3.02124463288990 |
| 6.26749985991046 | 2.12675636949628 |
| 6.26999985985458 | 3.04376539437881 |
| 6.27249985979870 | 2.10092893065925 |
| 6.27499985974282 | 3.01943927959977 |
| 6.27749985968694 | 2.09004049749927 |
| 6.27999985963106 | 2.97889042621074 |
| 6.28249985957518 | 2.06068502282979 |
| 6.28499985951930 | 2.95966934526900 |
| 6.28749985946342 | 2.03124163944938 |
| 6.28999985940754 | 2.99885546233892 |
| 6.29249985935166 | 2.04555986424964 |
| 6.29499985929579 | 3.02353070283568 |
| 6.29749985923991 | 2.09740377828328 |
| 6.29999985918403 | 3.03457074043826 |
| 6.30249985912815 | 2.12677006637271 |
| 6.30499985907227 | 3.06760199390110 |
| 6.30749985901639 | 2.13345996564782 |
| 6.30999985896051 | 3.13670499582316 |
| 6.31249985890463 | 2.16805617715501 |
| 6.31499985884875 | 3.15815778735056 |
| 6.31749985879287 | 2.22808319339247 |
| 6.31999985873699 | 3.14304398905217 |
| 6.32249985868111 | 2.25592016339630 |
| 6.32499985862523 | 3.13683166765751 |
| 6.32749985856935 | 2.21843372410582 |
| 6.32999985851347 | 3.17727959879989 |
| 6.33249985845760 | 2.16225937432145 |
| 6.33499985840172 | 3.19776918572589 |
| 6.33749985834584 | 2.13881248883323 |
| 6.33999985828996 | 3.17239210457282 |
| 6.34249985823408 | 2.13553228819468 |
| 6.34499985817820 | 3.12360176236504 |
| 6.34749985812232 | 2.11161778803125 |
| 6.34999985806644 | 3.10608388627384 |
| 6.35249985801056 | 2.07482242447444 |
| 6.35499985795468 | 3.09377765876315 |
| 6.35749985789880 | 2.06866998863908 |
| 6.35999985784292 | 3.04840277775411 |
| 6.36249985778704 | 2.08392253938624 |
| 6.36499985773116 | 3.00684137010136 |
| 6.36749985767528 | 2.09873156514786 |
| 6.36999985761940 | 3.01733230294328 |
| 6.37249985756353 | 2.10858999029517 |
| 6.37499985750765 | 3.03311968320045 |
| 6.37749985745177 | 2.13189702356821 |
| 6.37999985739589 | 3.01675049237172 |
| 6.38249985734001 | 2.15447104463648 |

|                  |                  |
|------------------|------------------|
| 6.38499985728413 | 2.98272636718255 |
| 6.38749985722825 | 2.16195470646311 |
| 6.38999985717237 | 2.98343625644759 |
| 6.39249985711649 | 2.15221719276796 |
| 6.39499985706061 | 3.00671835597051 |
| 6.39749985700473 | 2.13943988127500 |
| 6.39999985694885 | 3.02464804214656 |
| 6.40249985689297 | 2.11754259005197 |
| 6.40499985683709 | 3.02868761614020 |
| 6.40749985678121 | 2.08114706520923 |
| 6.40999985672534 | 3.05171031066351 |
| 6.41249985666946 | 2.05962944929058 |
| 6.41499985661358 | 3.08384720409621 |
| 6.41749985655770 | 2.08406459319307 |
| 6.41999985650182 | 3.09293096826441 |
| 6.42249985644594 | 2.13001691067888 |
| 6.42499985639006 | 3.09252441392691 |
| 6.42749985633418 | 2.14583505525774 |
| 6.42999985627830 | 3.10677049182604 |
| 6.43249985622242 | 2.13479550004913 |
| 6.43499985616654 | 3.15594196309977 |
| 6.43749985611066 | 2.14311825090381 |
| 6.43999985605478 | 3.17212250548225 |
| 6.44249985599890 | 2.18003474014728 |
| 6.44499985594302 | 3.17574581510816 |
| 6.44749985588714 | 2.20843546063610 |
| 6.44999985583127 | 3.14626168011261 |
| 6.45249985577539 | 2.19665104594813 |
| 6.45499985571951 | 3.14517306364292 |
| 6.45749985566363 | 2.16814189185233 |
| 6.45999985560775 | 3.11887328329863 |
| 6.46249985555187 | 2.14910973607724 |
| 6.46499985549599 | 3.09295879949152 |
| 6.46749985544011 | 2.13066277838869 |
| 6.46999985538423 | 3.05631659039603 |
| 6.47249985532835 | 2.09703110321664 |
| 6.47499985527247 | 3.05304900233603 |
| 6.47749985521659 | 2.06180919684655 |
| 6.47999985516071 | 3.04062129003219 |
| 6.48249985510483 | 2.05847403932986 |
| 6.48499985504895 | 2.99901510079309 |
| 6.48749985499308 | 2.07665655180268 |
| 6.48999985493720 | 2.96682266940459 |
| 6.49249985488132 | 2.10030614762348 |
| 6.49499985482544 | 2.96517266310665 |
| 6.49749985476956 | 2.11190690092722 |
| 6.49999985471368 | 3.00098613033033 |
| 6.50249985465780 | 2.12818997895066 |
| 6.50499985460192 | 3.00305711190247 |
| 6.50749985454604 | 2.13660428603099 |
| 6.50999985449016 | 3.02904301166953 |
| 6.51249985443428 | 2.14029262107428 |

|                  |                  |
|------------------|------------------|
| 6.51499985437840 | 3.04521550923100 |
| 6.51749985432252 | 2.14389254089332 |
| 6.51999985426664 | 3.08618444024737 |
| 6.52249985421076 | 2.16014651512993 |
| 6.52499985415488 | 3.08066658432798 |
| 6.52749985409901 | 2.16046234509398 |
| 6.52999985404313 | 3.07808073780221 |
| 6.53249985398725 | 2.12958211470514 |
| 6.53499985393137 | 3.09670917306808 |
| 6.53749985387549 | 2.09746025514597 |
| 6.53999985381961 | 3.14283281167325 |
| 6.54249985376373 | 2.10230436888929 |
| 6.54499985370785 | 3.15366403068907 |
| 6.54749985365197 | 2.13178964496453 |
| 6.54999985359609 | 3.13302488569322 |
| 6.55249985354021 | 2.13578551011893 |
| 6.55499985348433 | 3.12567049934362 |
| 6.55749985342845 | 2.12235604073421 |
| 6.55999985337257 | 3.13326220688055 |
| 6.56249985331669 | 2.13277189155170 |
| 6.56499985326082 | 3.13214917897360 |
| 6.56749985320494 | 2.16793466703058 |
| 6.56999985314906 | 3.09765390781927 |
| 6.57249985309318 | 2.17441859258492 |
| 6.57499985303730 | 3.09051908152449 |
| 6.57749985298142 | 2.14001732128644 |
| 6.57999985292554 | 3.09490560693812 |
| 6.58249985286966 | 2.11380923251887 |
| 6.58499985281378 | 3.09156567673355 |
| 6.58749985275790 | 2.12694378751226 |
| 6.58999985270202 | 3.02961006967745 |
| 6.59249985264614 | 2.13963782426980 |
| 6.59499985259026 | 2.99518393634548 |
| 6.59749985253438 | 2.11960197764911 |
| 6.59999985247850 | 2.99281341431286 |
| 6.60249985242262 | 2.08046731006041 |
| 6.60499985236675 | 3.00828447363759 |
| 6.60749985231087 | 2.06915536208787 |
| 6.60999985225499 | 2.99065835593887 |
| 6.61249985219911 | 2.07877940518902 |
| 6.61499985214323 | 2.99264624596410 |
| 6.61749985208735 | 2.09546771229456 |
| 6.61999985203147 | 3.01157594236954 |
| 6.62249985197559 | 2.11034159353433 |
| 6.62499985191971 | 3.03915615171662 |
| 6.62749985186383 | 2.13148240768297 |
| 6.62999985180795 | 3.03759425428759 |
| 6.63249985175207 | 2.14126558006358 |
| 6.63499985169619 | 3.04571582020861 |
| 6.63749985164031 | 2.14251930234175 |
| 6.63999985158443 | 3.09655234215442 |
| 6.64249985152856 | 2.14729469593440 |

|                  |                  |
|------------------|------------------|
| 6.64499985147268 | 3.13847584062424 |
| 6.64749985141680 | 2.16031411943796 |
| 6.64999985136092 | 3.15128675359670 |
| 6.65249985130504 | 2.16169453590950 |
| 6.65499985124916 | 3.13419631911117 |
| 6.65749985119328 | 2.14368790478675 |
| 6.65999985113740 | 3.14976371426382 |
| 6.66249985108152 | 2.13828650156054 |
| 6.66499985102564 | 3.14674744655033 |
| 6.66749985096976 | 2.15341069800561 |
| 6.66999985091388 | 3.13518951455538 |
| 6.67249985085800 | 2.16002874933761 |
| 6.67499985080212 | 3.10507024590008 |
| 6.67749985074624 | 2.12433885744365 |
| 6.67999985069036 | 3.11129449271216 |
| 6.68249985063449 | 2.08697283495354 |
| 6.68499985057861 | 3.10940543366574 |
| 6.68749985052273 | 2.09444277200238 |
| 6.68999985046685 | 3.08145481064805 |
| 6.69249985041097 | 2.13519709772096 |
| 6.69499985035509 | 3.02803223432166 |
| 6.69749985029921 | 2.14650586940684 |
| 6.69999985024333 | 3.00745196841895 |
| 6.70249985018745 | 2.11890324363266 |
| 6.70499985013157 | 3.01763979212712 |
| 6.70749985007569 | 2.09495252365179 |
| 6.70999985001981 | 3.01618858399487 |
| 6.71249984996393 | 2.10293532923031 |
| 6.71499984990805 | 3.00315131387381 |
| 6.71749984985217 | 2.11794366217187 |
| 6.71999984979630 | 3.00101958018088 |
| 6.72249984974042 | 2.11827829622290 |
| 6.72499984968454 | 3.01937237890741 |
| 6.72749984962866 | 2.11429789005239 |
| 6.72999984957278 | 3.02033432035909 |
| 6.73249984951690 | 2.11904773234724 |
| 6.73499984946102 | 3.01018966779603 |
| 6.73749984940514 | 2.11937210184573 |
| 6.73999984934926 | 3.02290331891941 |
| 6.74249984929338 | 2.11096500164569 |
| 6.74499984923750 | 3.07491858047868 |
| 6.74749984918162 | 2.10655059625683 |
| 6.74999984912574 | 3.12000372347791 |
| 6.75249984906986 | 2.12235464611643 |
| 6.75499984901398 | 3.11774352908863 |
| 6.75749984895810 | 2.13740296564452 |
| 6.75999984890223 | 3.11186533972455 |
| 6.76249984884635 | 2.14243012245861 |
| 6.76499984879047 | 3.13199935566740 |
| 6.76749984873459 | 2.15125216364912 |
| 6.76999984867871 | 3.16291575275062 |
| 6.77249984862283 | 2.17418459168926 |

|                  |                  |
|------------------|------------------|
| 6.77499984856695 | 3.15064569423142 |
| 6.77749984851107 | 2.17993516911192 |
| 6.77999984845519 | 3.12937323836915 |
| 6.78249984839931 | 2.15059019301121 |
| 6.78499984834343 | 3.14397529960940 |
| 6.78749984828755 | 2.12649204058021 |
| 6.78999984823167 | 3.14697938156480 |
| 6.79249984817579 | 2.14085770511307 |
| 6.79499984811991 | 3.11275617605331 |
| 6.79749984806404 | 2.16666114617353 |
| 6.79999984800816 | 3.03586953438665 |
| 6.80249984795228 | 2.14427010613355 |
| 6.80499984789640 | 3.01263717543683 |
| 6.80749984784052 | 2.09081802093391 |
| 6.80999984778464 | 3.02010544055071 |
| 6.81249984772876 | 2.06237170053145 |
| 6.81499984767288 | 3.02566875161063 |
| 6.81749984761700 | 2.07825305035431 |
| 6.81999984756112 | 2.98452231774551 |
| 6.82249984750524 | 2.08919155551376 |
| 6.82499984744936 | 2.98391586423528 |
| 6.82749984739348 | 2.08104056917927 |
| 6.82999984733760 | 3.00157951340590 |
| 6.83249984728172 | 2.09251231373055 |
| 6.83499984722584 | 3.01670255891130 |
| 6.83749984716997 | 2.13024055493787 |
| 6.83999984711409 | 3.00201501170081 |
| 6.84249984705821 | 2.15557475639654 |
| 6.84499984700233 | 3.02908881341848 |
| 6.84749984694645 | 2.14473731448702 |
| 6.84999984689057 | 3.09028189902637 |
| 6.85249984683469 | 2.13570439667595 |
| 6.85499984677881 | 3.13012802109179 |
| 6.85749984672293 | 2.15337634392389 |
| 6.85999984666705 | 3.11988704288392 |
| 6.86249984661117 | 2.17322689798580 |
| 6.86499984655529 | 3.10239342487490 |
| 6.86749984649941 | 2.16237387860518 |
| 6.86999984644353 | 3.13242947098782 |
| 6.87249984638765 | 2.13664032233153 |
| 6.87499984633178 | 3.15223111621689 |
| 6.87749984627590 | 2.12688047387859 |
| 6.87999984622002 | 3.13942056133947 |
| 6.88249984616414 | 2.12324164651624 |
| 6.88499984610826 | 3.11609601457240 |
| 6.88749984605238 | 2.11082697566759 |
| 6.88999984599650 | 3.13800092190713 |
| 6.89249984594062 | 2.10760077426300 |
| 6.89499984588474 | 3.13096398326011 |
| 6.89749984582886 | 2.12978040775921 |
| 6.89999984577298 | 3.10169554588535 |
| 6.90249984571710 | 2.15175224540977 |



|                  |                  |
|------------------|------------------|
| 6.90499984566122 | 3.04083551221996 |
| 6.90749984560534 | 2.15030218690978 |
| 6.90999984554946 | 3.04624020032466 |
| 6.91249984549358 | 2.13780874553221 |
| 6.91499984543771 | 3.04780070240001 |
| 6.91749984538183 | 2.13393905319458 |
| 6.91999984532595 | 3.04300398590883 |
| 6.92249984527007 | 2.13099931267047 |
| 6.92499984521419 | 2.99576015847214 |
| 6.92749984515831 | 2.10815299401846 |
| 6.92999984510243 | 2.98894496884118 |
| 6.93249984504655 | 2.08437996417592 |
| 6.93499984499067 | 2.99342600447481 |
| 6.93749984493479 | 2.08788497864370 |
| 6.93999984487891 | 2.98876043799583 |
| 6.94249984482303 | 2.09860015285928 |
| 6.94499984476715 | 2.98443799803363 |
| 6.94749984471127 | 2.08258251974658 |
| 6.94999984465539 | 3.01605325898765 |
| 6.95249984459952 | 2.05995775381487 |
| 6.95499984454364 | 3.07935181440981 |
| 6.95749984448776 | 2.08922249950741 |
| 6.95999984443188 | 3.09253770501752 |
| 6.96249984437600 | 2.15440966028423 |
| 6.96499984432012 | 3.09837664345121 |
| 6.96749984426424 | 2.20055005750540 |
| 6.96999984420836 | 3.10132617342420 |
| 6.97249984415248 | 2.19728279242045 |
| 6.97499984409660 | 3.15362883632190 |
| 6.97749984404072 | 2.18608254416182 |
| 6.97999984398484 | 3.16633696459252 |
| 6.98249984392896 | 2.18901315554955 |
| 6.98499984387308 | 3.16833318216156 |
| 6.98749984381720 | 2.19235101519693 |
| 6.98999984376132 | 3.14628222046624 |
| 6.99249984370545 | 2.16833139230262 |
| 6.99499984364957 | 3.15357980826663 |
| 6.99749984359369 | 2.13009172304129 |
| 6.99999984353781 | 3.13500837162742 |
| 7.00249984348193 | 2.10386437166372 |
| 7.00499984342605 | 3.08726257019224 |
| 7.00749984337017 | 2.08881008150789 |
| 7.00999984331429 | 3.04724549731951 |
| 7.01249984325841 | 2.07745352922346 |
| 7.01499984320253 | 3.04089130186546 |
| 7.01749984314665 | 2.06803855743504 |
| 7.01999984309077 | 3.05691432931134 |
| 7.02249984303489 | 2.08103040342447 |
| 7.02499984297901 | 3.03651914149359 |
| 7.02749984292313 | 2.10586882865719 |
| 7.02999984286726 | 3.00585391224025 |
| 7.03249984281138 | 2.13164197735009 |

|                  |                  |
|------------------|------------------|
| 7.03499984275550 | 2.99524730634467 |
| 7.03749984269962 | 2.15490946368774 |
| 7.03999984264374 | 3.01405103631060 |
| 7.04249984258786 | 2.18215578516223 |
| 7.04499984253198 | 3.01157866712776 |
| 7.04749984247610 | 2.18224851297990 |
| 7.04999984242022 | 3.00037193745275 |
| 7.05249984236434 | 2.13995026457462 |
| 7.05499984230846 | 3.02348707864975 |
| 7.05749984225258 | 2.08923855025940 |
| 7.05999984219670 | 3.06670040787081 |
| 7.06249984214082 | 2.08679724994308 |
| 7.06499984208494 | 3.07186813962628 |
| 7.06749984202906 | 2.11407199271855 |
| 7.06999984197319 | 3.05008390875595 |
| 7.07249984191731 | 2.11007156723226 |
| 7.07499984186143 | 3.05681414580753 |
| 7.07749984180555 | 2.07061550902745 |
| 7.07999984174967 | 3.10467920348335 |
| 7.08249984169379 | 2.07127716361886 |
| 7.08499984163791 | 3.14206130356793 |
| 7.08749984158203 | 2.12698383248228 |
| 7.08999984152615 | 3.14080052831981 |
| 7.09249984147027 | 2.18394622705002 |
| 7.09499984141439 | 3.13934593112483 |
| 7.09749984135851 | 2.19394050821393 |
| 7.09999984130263 | 3.16564465613578 |
| 7.10249984124675 | 2.19180569258888 |
| 7.10499984119087 | 3.16876791100721 |
| 7.10749984113500 | 2.20222412907270 |
| 7.10999984107912 | 3.13565787996889 |
| 7.11249984102324 | 2.21113541824512 |
| 7.11499984096736 | 3.09925585647571 |
| 7.11749984091148 | 2.18453457772474 |
| 7.11999984085560 | 3.10208539557408 |
| 7.12249984079972 | 2.12855950453470 |
| 7.12499984074384 | 3.09460838022697 |
| 7.12749984068796 | 2.08366886411565 |
| 7.12999984063208 | 3.05639464801701 |
| 7.13249984057620 | 2.06124180679730 |
| 7.13499984052032 | 3.00327421761916 |
| 7.13749984046444 | 2.05576002106788 |
| 7.13999984040856 | 2.99013614068892 |
| 7.14249984035268 | 2.05713329275135 |
| 7.14499984029680 | 2.99225402978340 |
| 7.14749984024093 | 2.07744701054684 |
| 7.14999984018505 | 2.98864756054959 |
| 7.15249984012917 | 2.09721761930874 |
| 7.15499984007329 | 2.98126016996052 |
| 7.15749984001741 | 2.11707113900407 |
| 7.15999983996153 | 3.01812963290346 |
| 7.16249983990565 | 2.14169435772007 |



|                  |                  |
|------------------|------------------|
| 7.16499983984977 | 3.04632386892300 |
| 7.16749983979389 | 2.18039914022112 |
| 7.16999983973801 | 3.05511736510711 |
| 7.17249983968213 | 2.19811281014624 |
| 7.17499983962625 | 3.04833914590240 |
| 7.17749983957037 | 2.18140480685154 |
| 7.17999983951449 | 3.07006696845704 |
| 7.18249983945861 | 2.14390062369714 |
| 7.18499983940274 | 3.10231341717145 |
| 7.18749983934686 | 2.12223189816782 |
| 7.18999983929098 | 3.12138309690464 |
| 7.19249983923510 | 2.11289977151994 |
| 7.19499983917922 | 3.12629779987784 |
| 7.19749983912334 | 2.09498823268437 |
| 7.19999983906746 | 3.12242521080041 |
| 7.20249983901158 | 2.07466626759125 |
| 7.20499983895570 | 3.13572603905092 |
| 7.20749983889982 | 2.08825619820126 |
| 7.20999983884394 | 3.12546931097091 |
| 7.21249983878806 | 2.13025049471113 |
| 7.21499983873218 | 3.12192188952014 |
| 7.21749983867630 | 2.16016812311195 |
| 7.21999983862042 | 3.10955118908324 |
| 7.22249983856454 | 2.16140011374248 |
| 7.22499983850867 | 3.13374751360444 |
| 7.22749983845279 | 2.16018139295616 |
| 7.22999983839691 | 3.11912939532059 |
| 7.23249983834103 | 2.17677007695048 |
| 7.23499983828515 | 3.09675157462800 |
| 7.23749983822927 | 2.18659111280802 |
| 7.23999983817339 | 3.04956853296413 |
| 7.24249983811751 | 2.17076780211864 |
| 7.24499983806163 | 3.03253783556018 |
| 7.24749983800575 | 2.12472203551006 |
| 7.24999983794987 | 3.01338044228089 |
| 7.25249983789399 | 2.08737576297704 |
| 7.25499983783811 | 2.99255402594857 |
| 7.25749983778223 | 2.05698181912456 |
| 7.25999983772635 | 2.98472695866188 |
| 7.26249983767048 | 2.04525379751585 |
| 7.26499983761460 | 2.99166628932456 |
| 7.26749983755872 | 2.04925143713503 |
| 7.26999983750284 | 3.01399704039453 |
| 7.27249983744696 | 2.07937630499027 |
| 7.27499983739108 | 3.00282643697267 |
| 7.27749983733520 | 2.11147472021287 |
| 7.27999983727932 | 3.01788569784361 |
| 7.28249983722344 | 2.14141010577073 |
| 7.28499983716756 | 3.04505562250955 |
| 7.28749983711168 | 2.16885038663920 |
| 7.28999983705580 | 3.10581862398450 |
| 7.29249983699992 | 2.18773398848443 |

|                  |                  |
|------------------|------------------|
| 7.29499983694404 | 3.12471201652328 |
| 7.29749983688816 | 2.19219518471896 |
| 7.29999983683228 | 3.14799232022316 |
| 7.30249983677641 | 2.17470816588939 |
| 7.30499983672053 | 3.14988351100243 |
| 7.30749983666465 | 2.16099399310618 |
| 7.30999983660877 | 3.16621505858509 |
| 7.31249983655289 | 2.15474475535781 |
| 7.31499983649701 | 3.15322731480716 |
| 7.31749983644113 | 2.15216533725943 |
| 7.31999983638525 | 3.13036193547040 |
| 7.32249983632937 | 2.10952249335958 |
| 7.32499983627349 | 3.12186064166260 |
| 7.32749983621761 | 2.06495040610544 |
| 7.32999983616173 | 3.13556181574610 |
| 7.33249983610585 | 2.06300837093115 |
| 7.33499983604997 | 3.12301060385216 |
| 7.33749983599409 | 2.11385303679466 |
| 7.33999983593822 | 3.07397788208146 |
| 7.34249983588234 | 2.14906837779769 |
| 7.34499983582646 | 3.04335780353116 |
| 7.34749983577058 | 2.14926119002996 |
| 7.34999983571470 | 3.03574822808974 |
| 7.35249983565882 | 2.13708085926598 |
| 7.35499983560294 | 3.03792611276459 |
| 7.35749983554706 | 2.14292895001911 |
| 7.35999983549118 | 3.01372834502166 |
| 7.36249983543530 | 2.15143486912665 |
| 7.36499983537942 | 3.00730673660486 |
| 7.36749983532354 | 2.13169710900798 |
| 7.36999983526766 | 3.00530588382564 |
| 7.37249983521178 | 2.09968819302938 |
| 7.37499983515590 | 3.01302897350689 |
| 7.37749983510002 | 2.08136064443119 |
| 7.37999983504415 | 2.98393347088972 |
| 7.38249983498827 | 2.08386271092627 |
| 7.38499983493239 | 2.98322737829134 |
| 7.38749983487651 | 2.07582365061679 |
| 7.38999983482063 | 3.01889192865197 |
| 7.39249983476475 | 2.07824348208289 |
| 7.39499983470887 | 3.07135220092796 |
| 7.39749983465299 | 2.09300707891349 |
| 7.39999983459711 | 3.08583364402215 |
| 7.40249983454123 | 2.12503489319046 |
| 7.40499983448535 | 3.09874077518030 |
| 7.40749983442947 | 2.15339816560617 |
| 7.40999983437359 | 3.12033652657049 |
| 7.41249983431771 | 2.19114168445721 |
| 7.41499983426183 | 3.14492492516658 |
| 7.41749983420596 | 2.21105641862549 |
| 7.41999983415008 | 3.14752317680522 |
| 7.42249983409420 | 2.21100181926678 |

|                  |                  |
|------------------|------------------|
| 7.42499983403832 | 3.14043007464089 |
| 7.42749983398244 | 2.17535493518874 |
| 7.42999983392656 | 3.15853072157309 |
| 7.43249983387068 | 2.14310068204973 |
| 7.43499983381480 | 3.16394955798050 |
| 7.43749983375892 | 2.12967087546809 |
| 7.43999983370304 | 3.13693290595432 |
| 7.44249983364716 | 2.12948152536011 |
| 7.44499983359128 | 3.08002819263363 |
| 7.44749983353540 | 2.10476501229947 |
| 7.44999983347952 | 3.04897812220964 |
| 7.45249983342364 | 2.07607804609798 |
| 7.45499983336776 | 3.03459505468357 |
| 7.45749983331189 | 2.07014679941641 |
| 7.45999983325601 | 3.02094939153605 |
| 7.46249983320013 | 2.08367024669332 |
| 7.46499983314425 | 3.00426497835560 |
| 7.46749983308837 | 2.09937331072728 |
| 7.46999983303249 | 2.99537082966033 |
| 7.47249983297661 | 2.10472932689835 |
| 7.47499983292073 | 2.99757471140604 |
| 7.47749983286485 | 2.12478630978765 |
| 7.47999983280897 | 2.99288609000293 |
| 7.48249983275309 | 2.14444005115205 |
| 7.48499983269721 | 2.98703191609029 |
| 7.48749983264133 | 2.15770757589067 |
| 7.48999983258545 | 2.99462223720889 |
| 7.49249983252957 | 2.12840630266239 |
| 7.49499983247370 | 3.03561973273663 |
| 7.49749983241782 | 2.10350821786296 |
| 7.49999983236194 | 3.07225084455241 |
| 7.50249983230606 | 2.09745452822630 |
| 7.50499983225018 | 3.08109301492847 |
| 7.50749983219430 | 2.11965004068738 |
| 7.50999983213842 | 3.07797516494253 |
| 7.51249983208254 | 2.12731082336009 |
| 7.51499983202666 | 3.09258034700685 |
| 7.51749983197078 | 2.12891959162435 |
| 7.51999983191490 | 3.11871475689875 |
| 7.52249983185902 | 2.12821228432081 |
| 7.52499983180314 | 3.11709424430991 |
| 7.52749983174726 | 2.14208092761898 |
| 7.52999983169138 | 3.11708497413208 |
| 7.53249983163550 | 2.14795461411944 |
| 7.53499983157963 | 3.12275297246612 |
| 7.53749983152375 | 2.14517989711213 |
| 7.53999983146787 | 3.14629668060483 |
| 7.54249983141199 | 2.14361890226691 |
| 7.54499983135611 | 3.11958295485887 |
| 7.54749983130023 | 2.14584248832224 |
| 7.54999983124435 | 3.08329237188269 |
| 7.55249983118847 | 2.13734221308568 |

|                  |                  |
|------------------|------------------|
| 7.55499983113259 | 3.05900341423069 |
| 7.55749983107671 | 2.12151412739439 |
| 7.55999983102083 | 3.07015574266746 |
| 7.56249983096495 | 2.11411589700305 |
| 7.56499983090907 | 3.05537986201405 |
| 7.56749983085319 | 2.10461786890138 |
| 7.56999983079731 | 3.02605075485095 |
| 7.57249983074144 | 2.08997805001703 |
| 7.57499983068556 | 3.00947689121831 |
| 7.57749983062968 | 2.08136946521779 |
| 7.57999983057380 | 3.01023504985508 |
| 7.58249983051792 | 2.10688433565253 |
| 7.58499983046204 | 3.00289499451613 |
| 7.58749983040616 | 2.13038638305097 |
| 7.58999983035028 | 2.97913144562102 |
| 7.59249983029440 | 2.12652609108424 |
| 7.59499983023852 | 2.98603871180901 |
| 7.59749983018264 | 2.08803781747290 |
| 7.59999983012676 | 3.02219172753914 |
| 7.60249983007088 | 2.08617426367813 |
| 7.60499983001500 | 3.06051404079200 |
| 7.60749982995912 | 2.11661286439892 |
| 7.60999982990324 | 3.05184495075258 |
| 7.61249982984737 | 2.14850209630710 |
| 7.61499982979149 | 3.06218274700303 |
| 7.61749982973561 | 2.13343439187288 |
| 7.61999982967973 | 3.08628551989183 |
| 7.62249982962385 | 2.11446274916963 |
| 7.62499982956797 | 3.12934522487325 |
| 7.62749982951209 | 2.11863434891843 |
| 7.62999982945621 | 3.12790857824937 |
| 7.63249982940033 | 2.15126069535982 |
| 7.63499982934445 | 3.13593260442568 |
| 7.63749982928857 | 2.16322791850073 |
| 7.63999982923269 | 3.14614737580012 |
| 7.64249982917681 | 2.14569879233619 |
| 7.64499982912093 | 3.17344329193465 |
| 7.64749982906505 | 2.13223334422502 |
| 7.64999982900918 | 3.15260043825570 |
| 7.65249982895330 | 2.14410461235640 |
| 7.65499982889742 | 3.11991219683728 |
| 7.65749982884154 | 2.15847153631592 |
| 7.65999982878566 | 3.09956846340987 |
| 7.66249982872978 | 2.14817204220030 |
| 7.66499982867390 | 3.10236471720605 |
| 7.66749982861802 | 2.12861652531357 |
| 7.66999982856214 | 3.08831028825489 |
| 7.67249982850626 | 2.11082767662687 |
| 7.67499982845038 | 3.04411975287126 |
| 7.67749982839450 | 2.10263815042936 |
| 7.67999982833862 | 3.02113140455774 |
| 7.68249982828274 | 2.09785102192744 |

|                  |                  |
|------------------|------------------|
| 7.68499982822686 | 2.99879253278932 |
| 7.68749982817098 | 2.10867883342770 |
| 7.68999982811511 | 2.99764997864010 |
| 7.69249982805923 | 2.10963097052399 |
| 7.69499982800335 | 2.96185899678124 |
| 7.69749982794747 | 2.09747595233342 |
| 7.69999982789159 | 2.96709025067287 |
| 7.70249982783571 | 2.07117449252206 |
| 7.70499982777983 | 2.98901279520513 |
| 7.70749982772395 | 2.07929451751453 |
| 7.70999982766807 | 3.03075003729621 |
| 7.71249982761219 | 2.11049843983927 |
| 7.71499982755631 | 3.02940809431463 |
| 7.71749982750043 | 2.14091097216909 |
| 7.71999982744455 | 3.03713850220467 |
| 7.72249982738867 | 2.13482703031440 |
| 7.72499982733279 | 3.06170046879981 |
| 7.72749982727692 | 2.13275462315593 |
| 7.72999982722104 | 3.10471160229690 |
| 7.73249982716516 | 2.14521680691766 |
| 7.73499982710928 | 3.12749467061848 |
| 7.73749982705340 | 2.17218864238675 |
| 7.73999982699752 | 3.12949490702397 |
| 7.74249982694164 | 2.16842415666862 |
| 7.74499982688576 | 3.14027918471670 |
| 7.74749982682988 | 2.14019906637537 |
| 7.74999982677400 | 3.15573305478014 |
| 7.75249982671812 | 2.12371320556096 |
| 7.75499982666224 | 3.15725509314103 |
| 7.75749982660636 | 2.13891142102332 |
| 7.75999982655048 | 3.12207294940045 |
| 7.76249982649460 | 2.14832192443055 |
| 7.76499982643872 | 3.10487108998329 |
| 7.76749982638285 | 2.12076790531095 |
| 7.76999982632697 | 3.10772885148962 |
| 7.77249982627109 | 2.09503124201263 |
| 7.77499982621521 | 3.10764686232879 |
| 7.77749982615933 | 2.09779077960077 |
| 7.77999982610345 | 3.07105632169438 |
| 7.78249982604757 | 2.12339073309224 |
| 7.78499982599169 | 3.03612028291980 |
| 7.78749982593581 | 2.13083746965694 |
| 7.78999982587993 | 3.02092336477674 |
| 7.79249982582405 | 2.13342473455264 |
| 7.79499982576817 | 3.01490145640749 |
| 7.79749982571229 | 2.12852550924484 |
| 7.79999982565641 | 2.98774985093950 |
| 7.80249982560053 | 2.12726100657536 |
| 7.80499982554466 | 2.97527710073549 |
| 7.80749982548878 | 2.10630215172705 |
| 7.80999982543290 | 2.98991792342900 |
| 7.81249982537702 | 2.09275521301178 |



|                  |                  |
|------------------|------------------|
| 7.81499982532114 | 3.01165151910824 |
| 7.81749982526526 | 2.08679132442633 |
| 7.81999982520938 | 3.00232334639659 |
| 7.82249982515350 | 2.09429909798266 |
| 7.82499982509762 | 2.99894181365244 |
| 7.82749982504174 | 2.09070447150835 |
| 7.82999982498586 | 3.03424892853256 |
| 7.83249982492998 | 2.09871783388906 |
| 7.83499982487410 | 3.07976267125472 |
| 7.83749982481822 | 2.11328549702188 |
| 7.83999982476234 | 3.10659322207108 |
| 7.84249982470647 | 2.13275121214970 |
| 7.84499982465059 | 3.12537546953210 |
| 7.84749982459471 | 2.14445812025439 |
| 7.84999982453883 | 3.15307854128897 |
| 7.85249982448295 | 2.16742452129388 |
| 7.85499982442707 | 3.17233945807853 |
| 7.85749982437119 | 2.19779148916043 |
| 7.85999982431531 | 3.16579998332949 |
| 7.86249982425943 | 2.21128917365278 |
| 7.86499982420355 | 3.14890507917276 |
| 7.86749982414767 | 2.18540408992250 |
| 7.86999982409179 | 3.14455232675400 |
| 7.87249982403591 | 2.14402195777119 |
| 7.87499982398003 | 3.15173146612160 |
| 7.87749982392415 | 2.12934115601939 |
| 7.87999982386827 | 3.12304763080440 |
| 7.88249982381240 | 2.12606661558593 |
| 7.88499982375652 | 3.08071732818349 |
| 7.88749982370064 | 2.10826530317724 |
| 7.88999982364476 | 3.04078326978395 |
| 7.89249982358888 | 2.06912299500175 |
| 7.89499982353300 | 3.02662367775910 |
| 7.89749982347712 | 2.06091186877411 |
| 7.89999982342124 | 3.00170747747211 |
| 7.90249982336536 | 2.07491877553821 |
| 7.90499982330948 | 2.98376908080820 |
| 7.90749982325360 | 2.10293749727233 |
| 7.90999982319772 | 2.98085321988806 |
| 7.91249982314184 | 2.10748209836193 |
| 7.91499982308596 | 2.99928185789015 |
| 7.91749982303008 | 2.11755837247288 |
| 7.91999982297421 | 3.01505607482199 |
| 7.92249982291833 | 2.13533626096617 |
| 7.92499982286245 | 3.00328617225349 |
| 7.92749982280657 | 2.16357622082075 |
| 7.92999982275069 | 3.00807301252912 |
| 7.93249982269481 | 2.16368193284642 |
| 7.93499982263893 | 3.03196709284121 |
| 7.93749982258305 | 2.14187288155460 |
| 7.93999982252717 | 3.08052097595342 |
| 7.94249982247129 | 2.11341875038408 |

|                  |                  |
|------------------|------------------|
| 7.94499982241541 | 3.08738893424006 |
| 7.94749982235953 | 2.09912252114116 |
| 7.94999982230365 | 3.10542392043228 |
| 7.95249982224777 | 2.09856310519674 |
| 7.95499982219189 | 3.11091366213513 |
| 7.95749982213601 | 2.10909120675186 |
| 7.95999982208014 | 3.14331938117351 |
| 7.96249982202426 | 2.12735065002199 |
| 7.96499982196838 | 3.13933538698193 |
| 7.96749982191250 | 2.13655366191912 |
| 7.96999982185662 | 3.13526007571397 |
| 7.97249982180074 | 2.13491474029972 |
| 7.97499982174486 | 3.14234573799288 |
| 7.97749982168898 | 2.13841502614203 |
| 7.97999982163310 | 3.16725225315225 |
| 7.98249982157722 | 2.17003411403162 |
| 7.98499982152134 | 3.15532955534743 |
| 7.98749982146546 | 2.19593813787843 |
| 7.98999982140958 | 3.11002355825418 |
| 7.99249982135370 | 2.18599581792304 |
| 7.99499982129782 | 3.07945078801286 |
| 7.99749982124195 | 2.14641025373063 |
| 7.99999982118607 | 3.06256853201590 |
| 8.00249982113019 | 2.12645609654820 |
| 8.00499982107431 | 3.05030459460773 |
| 8.00749982101843 | 2.11393621172896 |
| 8.00999982096255 | 3.00727478994155 |
| 8.01249982090667 | 2.09321917207444 |
| 8.01499982085079 | 2.99411808842103 |
| 8.01749982079491 | 2.05056524255094 |
| 8.01999982073903 | 2.98336427044654 |
| 8.02249982068315 | 2.03607505968002 |
| 8.02499982062727 | 2.99338555215963 |
| 8.02749982057139 | 2.06063029468801 |
| 8.02999982051551 | 2.97153042712085 |
| 8.03249982045963 | 2.10652656608100 |
| 8.03499982040375 | 2.98674790343511 |
| 8.03749982034788 | 2.12572167359346 |
| 8.03999982029200 | 3.01869916902529 |
| 8.04249982023612 | 2.13299876252707 |
| 8.04499982018024 | 3.07211067734188 |
| 8.04749982012436 | 2.14956811006048 |
| 8.04999982006848 | 3.08744064827828 |
| 8.05249982001260 | 2.17480133178596 |
| 8.05499981995672 | 3.10633716405753 |
| 8.05749981990084 | 2.18698490707321 |
| 8.05999981984496 | 3.12332174693050 |
| 8.06249981978908 | 2.17860854961257 |
| 8.06499981973320 | 3.14491141891199 |
| 8.06749981967732 | 2.16221459817151 |
| 8.06999981962144 | 3.14109525739494 |
| 8.07249981956556 | 2.13968611201410 |



|                  |                  |
|------------------|------------------|
| 8.07499981950969 | 3.13092004223774 |
| 8.07749981945381 | 2.11685740785368 |
| 8.07999981939793 | 3.14511815529099 |
| 8.08249981934205 | 2.09750887581006 |
| 8.08499981928617 | 3.14952228254540 |
| 8.08749981923029 | 2.09694081674686 |
| 8.08999981917441 | 3.13439961515966 |
| 8.09249981911853 | 2.10115098381863 |
| 8.09499981906265 | 3.09297409421579 |
| 8.09749981900677 | 2.10897070843291 |
| 8.09999981895089 | 3.08832783219868 |
| 8.10249981889501 | 2.12128772073781 |
| 8.10499981883913 | 3.07580734806668 |
| 8.10749981878325 | 2.14645469504227 |
| 8.10999981872737 | 3.06525699006087 |
| 8.11249981867149 | 2.15439166634876 |
| 8.11499981861562 | 3.03564042569686 |
| 8.11749981855974 | 2.14513127841095 |
| 8.11999981850386 | 3.03694913027828 |
| 8.12249981844798 | 2.13092399495477 |
| 8.12499981839210 | 3.02026010975694 |
| 8.12749981833622 | 2.13213965356259 |
| 8.12999981828034 | 3.00329417774100 |
| 8.13249981822446 | 2.12660895946622 |
| 8.13499981816858 | 2.97551622026885 |
| 8.13749981811270 | 2.09957697514404 |
| 8.13999981805682 | 2.98125856541746 |
| 8.14249981800094 | 2.05936530022480 |
| 8.14499981794506 | 3.00035748340760 |
| 8.14749981788918 | 2.05037318462128 |
| 8.14999981783330 | 3.01741198260645 |
| 8.15249981777743 | 2.07641806991126 |
| 8.15499981772155 | 3.03059883050644 |
| 8.15749981766567 | 2.10599962283805 |
| 8.15999981760979 | 3.05645508171166 |
| 8.16249981755391 | 2.11955199860301 |
| 8.16499981749803 | 3.09286876141924 |
| 8.16749981744215 | 2.13798449920386 |
| 8.16999981738627 | 3.11386644919319 |
| 8.17249981733039 | 2.17267879048745 |
| 8.17499981727451 | 3.12866248575921 |
| 8.17749981721863 | 2.19982105018613 |
| 8.17999981716275 | 3.14512024367114 |
| 8.18249981710687 | 2.20222872374806 |
| 8.18499981705099 | 3.17033096997679 |
| 8.18749981699511 | 2.18094726360703 |
| 8.18999981693923 | 3.17854401063852 |
| 8.19249981688336 | 2.16321405848566 |
| 8.19499981682748 | 3.15883757485471 |
| 8.19749981677160 | 2.14800365831369 |
| 8.19999981671572 | 3.12828799924639 |
| 8.20249981665984 | 2.13718467949707 |

|                  |                  |
|------------------|------------------|
| 8.20499981660396 | 3.10690338939128 |
| 8.20749981654808 | 2.11330103572728 |
| 8.20999981649220 | 3.09400940174751 |
| 8.21249981643632 | 2.08923052174168 |
| 8.21499981638044 | 3.06355351788964 |
| 8.21749981632456 | 2.06344464700970 |
| 8.21999981626868 | 3.03634420544674 |
| 8.22249981621280 | 2.06353542842714 |
| 8.22499981615692 | 3.02540802318150 |
| 8.22749981610104 | 2.08894788930265 |
| 8.22999981604517 | 3.01493924546449 |
| 8.23249981598929 | 2.13092435612084 |
| 8.23499981593341 | 3.00134658047450 |
| 8.23749981587753 | 2.15198778124737 |
| 8.23999981582165 | 2.97561412930121 |
| 8.24249981576577 | 2.14692096360276 |
| 8.24499981570989 | 2.98898665344795 |
| 8.24749981565401 | 2.13342001300494 |
| 8.24999981559813 | 3.00902757312541 |
| 8.25249981554225 | 2.13751419871074 |
| 8.25499981548637 | 3.03243890345708 |
| 8.25749981543049 | 2.14881019825763 |
| 8.25999981537461 | 3.01934843602291 |
| 8.26249981531873 | 2.12953886346974 |
| 8.26499981526285 | 3.03634535623223 |
| 8.26749981520697 | 2.08695234394919 |
| 8.26999981515110 | 3.05815481623560 |
| 8.27249981509522 | 2.07047147031322 |
| 8.27499981503934 | 3.08401826162314 |
| 8.27749981498346 | 2.09820907116474 |
| 8.27999981492758 | 3.08157722856235 |
| 8.28249981487170 | 2.12176309291353 |
| 8.28499981481582 | 3.11000311347208 |
| 8.28749981475994 | 2.12052965987958 |
| 8.28999981470406 | 3.14530867242835 |
| 8.29249981464818 | 2.12349940525869 |
| 8.29499981459230 | 3.16731356163895 |
| 8.29749981453642 | 2.15896761602971 |
| 8.29999981448054 | 3.15242745337193 |
| 8.30249981442466 | 2.19871311791693 |
| 8.30499981436878 | 3.13772102231683 |
| 8.30749981431291 | 2.21648173929248 |
| 8.30999981425703 | 3.14449849662057 |
| 8.31249981420115 | 2.20151301381663 |
| 8.31499981414527 | 3.13400700106525 |
| 8.31749981408939 | 2.17646448922168 |
| 8.31999981403351 | 3.11210525678101 |
| 8.32249981397763 | 2.14342617073810 |
| 8.32499981392175 | 3.07730319808384 |
| 8.32749981386587 | 2.11625797697870 |
| 8.32999981380999 | 3.06751060354386 |
| 8.33249981375411 | 2.09540346122793 |

|                  |                  |
|------------------|------------------|
| 8.33499981369823 | 3.02640635798004 |
| 8.33749981364235 | 2.08304882881823 |
| 8.33999981358647 | 2.99343279969954 |
| 8.34249981353059 | 2.06274388955028 |
| 8.34499981347471 | 2.95661076963336 |
| 8.34749981341884 | 2.05151648138980 |
| 8.34999981336296 | 2.97655334445815 |
| 8.35249981330708 | 2.06312311894686 |
| 8.35499981325120 | 2.98604221541056 |
| 8.35749981319532 | 2.10098024979484 |
| 8.35999981313944 | 3.00904243090356 |
| 8.36249981308356 | 2.13891690317600 |
| 8.36499981302768 | 3.00438336472245 |
| 8.36749981297180 | 2.15892098050716 |
| 8.36999981291592 | 3.03493267661805 |
| 8.37249981286004 | 2.17012556242859 |
| 8.37499981280416 | 3.05966894206971 |
| 8.37749981274828 | 2.18255137320637 |
| 8.37999981269240 | 3.08302060536919 |
| 8.38249981263652 | 2.18509895979953 |
| 8.38499981258065 | 3.09842365125317 |
| 8.38749981252477 | 2.15720807411687 |
| 8.38999981246889 | 3.12658785888067 |
| 8.39249981241301 | 2.12354087284728 |
| 8.39499981235713 | 3.15631871804116 |
| 8.39749981230125 | 2.11361237538083 |
| 8.39999981224537 | 3.14658020013141 |
| 8.40249981218949 | 2.12655119120255 |
| 8.40499981213361 | 3.13724284657133 |
| 8.40749981207773 | 2.12775053166390 |
| 8.40999981202185 | 3.12419593257545 |
| 8.41249981196597 | 2.11674073047929 |
| 8.41499981191009 | 3.14121929802442 |
| 8.41749981185421 | 2.11669466823678 |
| 8.41999981179833 | 3.12377059475164 |
| 8.42249981174245 | 2.13783440198042 |
| 8.42499981168658 | 3.11345301804684 |
| 8.42749981163070 | 2.15482812988438 |
| 8.42999981157482 | 3.08700650607704 |
| 8.43249981151894 | 2.15765107706645 |
| 8.43499981146306 | 3.08923693529826 |
| 8.43749981140718 | 2.15490420800299 |
| 8.43999981135130 | 3.05460584716670 |
| 8.44249981129542 | 2.15767463700948 |
| 8.44499981123954 | 3.02554803978932 |
| 8.44749981118366 | 2.14761406368789 |
| 8.44999981112778 | 3.00367326685211 |
| 8.45249981107190 | 2.12036924689498 |
| 8.45499981101602 | 3.01410414924999 |
| 8.45749981096014 | 2.08531305204686 |
| 8.45999981090426 | 3.01826002247023 |
| 8.46249981084839 | 2.07017057405543 |

|                  |                  |
|------------------|------------------|
| 8.46499981079251 | 3.01043341734907 |
| 8.46749981073663 | 2.07613357814592 |
| 8.46999981068075 | 3.00378610286851 |
| 8.47249981062487 | 2.09488938890744 |
| 8.47499981056899 | 3.01403214411559 |
| 8.47749981051311 | 2.11585996394327 |
| 8.47999981045723 | 3.05065807598607 |
| 8.48249981040135 | 2.13504923033123 |
| 8.48499981034547 | 3.07154450836627 |
| 8.48749981028959 | 2.14837401127131 |
| 8.48999981023371 | 3.09341223288119 |
| 8.49249981017783 | 2.15383016482475 |
| 8.49499981012195 | 3.12191947148898 |
| 8.49749981006607 | 2.17032256562383 |
| 8.49999981001019 | 3.15571498184801 |
| 8.50249980995432 | 2.19411901322991 |
| 8.50499980989844 | 3.15688768391623 |
| 8.50749980984256 | 2.20466549252126 |
| 8.50999980978668 | 3.14444985526960 |
| 8.51249980973080 | 2.17662540417638 |
| 8.51499980967492 | 3.13952477673644 |
| 8.51749980961904 | 2.14146617491732 |
| 8.51999980956316 | 3.15198818189615 |
| 8.52249980950728 | 2.12980635992336 |
| 8.52499980945140 | 3.14203454692577 |
| 8.52749980939552 | 2.14418721167859 |
| 8.52999980933964 | 3.10873163650821 |
| 8.53249980928376 | 2.14095452055152 |
| 8.53499980922788 | 3.06896403746476 |
| 8.53749980917200 | 2.11419703683337 |
| 8.53999980911613 | 3.05503460875994 |
| 8.54249980906025 | 2.09939305751091 |
| 8.54499980900437 | 3.02784961663703 |
| 8.54749980894849 | 2.11760895294410 |
| 8.54999980889261 | 2.99250050992761 |
| 8.55249980883673 | 2.13604359959623 |
| 8.55499980878085 | 2.96284235802683 |
| 8.55749980872497 | 2.12244405023949 |
| 8.55999980866909 | 2.97777628195504 |
| 8.56249980861321 | 2.09455159371284 |
| 8.56499980855733 | 2.98077623894129 |
| 8.56749980850145 | 2.08813299075466 |
| 8.56999980844557 | 2.97870276602433 |
| 8.57249980838969 | 2.10579647529029 |
| 8.57499980833381 | 2.96801833429597 |
| 8.57749980827793 | 2.12159146756344 |
| 8.57999980822206 | 2.99581590713114 |
| 8.58249980816618 | 2.12359640221394 |
| 8.58499980811030 | 3.02688172514685 |
| 8.58749980805442 | 2.11873644369044 |
| 8.58999980799854 | 3.05036795285765 |
| 8.59249980794266 | 2.12084357288085 |

|                  |                  |
|------------------|------------------|
| 8.59499980788678 | 3.07011067775040 |
| 8.59749980783090 | 2.13285375524601 |
| 8.59999980777502 | 3.10438324825447 |
| 8.60249980771914 | 2.15846691879236 |
| 8.60499980766326 | 3.12906848753890 |
| 8.60749980760738 | 2.17889238724036 |
| 8.60999980755150 | 3.12654023571839 |
| 8.61249980749562 | 2.17475129544461 |
| 8.61499980743974 | 3.12183299911718 |
| 8.61749980738387 | 2.14733926638410 |
| 8.61999980732799 | 3.13925716053432 |
| 8.62249980727211 | 2.13466101436785 |
| 8.62499980721623 | 3.15603705718865 |
| 8.62749980716035 | 2.14220845536936 |
| 8.62999980710447 | 3.13647968446824 |
| 8.63249980704859 | 2.14604971871716 |
| 8.63499980699271 | 3.11594267246671 |
| 8.63749980693683 | 2.12327142719531 |
| 8.63999980688095 | 3.09325831574070 |
| 8.64249980682507 | 2.10529408430984 |
| 8.64499980676919 | 3.08668628501894 |
| 8.64749980671331 | 2.11393742103474 |
| 8.64999980665743 | 3.04721089626662 |
| 8.65249980660155 | 2.13751551249084 |
| 8.65499980654567 | 3.02496829058124 |
| 8.65749980648980 | 2.13900466927517 |
| 8.65999980643392 | 3.00045844294568 |
| 8.66249980637804 | 2.12107301220420 |
| 8.66499980632216 | 3.00941588841107 |
| 8.66749980626628 | 2.10960052586005 |
| 8.66999980621040 | 2.98333107932744 |
| 8.67249980615452 | 2.11371889586246 |
| 8.67499980609864 | 2.96684018302065 |
| 8.67749980604276 | 2.11467941714176 |
| 8.67999980598688 | 2.95594654922615 |
| 8.68249980593100 | 2.09869242140934 |
| 8.68499980587512 | 2.98061435748907 |
| 8.68749980581924 | 2.08316052372495 |
| 8.68999980576336 | 2.99997803818928 |
| 8.69249980570748 | 2.08405595872112 |
| 8.69499980565161 | 3.01727428110969 |
| 8.69749980559573 | 2.09785402284597 |
| 8.69999980553985 | 3.04921519121331 |
| 8.70249980548397 | 2.11209465897672 |
| 8.70499980542809 | 3.08586406706809 |
| 8.70749980537221 | 2.13333079601219 |
| 8.70999980531633 | 3.12586559540170 |
| 8.71249980526045 | 2.16531079566191 |
| 8.71499980520457 | 3.12143201901659 |
| 8.71749980514869 | 2.19210931394148 |
| 8.71999980509281 | 3.14064014147753 |
| 8.72249980503693 | 2.19883640138779 |



|                  |                  |
|------------------|------------------|
| 8.72499980498105 | 3.15673982212155 |
| 8.72749980492517 | 2.19284678728565 |
| 8.72999980486929 | 3.19208420208647 |
| 8.73249980481341 | 2.18571001594493 |
| 8.73499980475754 | 3.16631405869238 |
| 8.73749980470166 | 2.17349129410127 |
| 8.73999980464578 | 3.14931722122288 |
| 8.74249980458990 | 2.15036030923308 |
| 8.74499980453402 | 3.11946404920669 |
| 8.74749980447814 | 2.12896455069149 |
| 8.74999980442226 | 3.10771135432170 |
| 8.75249980436638 | 2.11268289015602 |
| 8.75499980431050 | 3.07354608022785 |
| 8.75749980425462 | 2.09630969556361 |
| 8.75999980419874 | 3.03967549877631 |
| 8.76249980414286 | 2.07250897425391 |
| 8.76499980408698 | 3.02460367762555 |
| 8.76749980403110 | 2.07078714053328 |
| 8.76999980397522 | 3.01851375756977 |
| 8.77249980391935 | 2.09941521945326 |
| 8.77499980386347 | 3.00754867178937 |
| 8.77749980380759 | 2.13983656648773 |
| 8.77999980375171 | 2.97560836107089 |
| 8.78249980369583 | 2.15527117780408 |
| 8.78499980363995 | 2.97538166449365 |
| 8.78749980358407 | 2.15262482555809 |
| 8.78999980352819 | 2.98219203822188 |
| 8.79249980347231 | 2.15089280958722 |
| 8.79499980341643 | 3.00805934225141 |
| 8.79749980336055 | 2.15741522383569 |
| 8.79999980330467 | 3.00537994094740 |
| 8.80249980324879 | 2.14731107161701 |
| 8.80499980319291 | 3.03160785056973 |
| 8.80749980313703 | 2.11018201147863 |
| 8.80999980308115 | 3.05241068406366 |
| 8.81249980302528 | 2.07897603896606 |
| 8.81499980296940 | 3.08300840190973 |
| 8.81749980291352 | 2.08567322266601 |
| 8.81999980285764 | 3.08092594550713 |
| 8.82249980280176 | 2.11446143818704 |
| 8.82499980274588 | 3.09626212928250 |
| 8.82749980269000 | 2.12554701002942 |
| 8.82999980263412 | 3.13565613606132 |
| 8.83249980257824 | 2.12862621900347 |
| 8.83499980252236 | 3.17101084240184 |
| 8.83749980246648 | 2.14789714999974 |
| 8.83999980241060 | 3.16927738773510 |
| 8.84249980235472 | 2.18498619677677 |
| 8.84499980229884 | 3.16070969636789 |
| 8.84749980224296 | 2.21599814346199 |
| 8.84999980218709 | 3.15916064864008 |
| 8.85249980213121 | 2.23230901788037 |

|                  |                  |
|------------------|------------------|
| 8.85499980207533 | 3.15026852792123 |
| 8.85749980201945 | 2.22396520769660 |
| 8.85999980196357 | 3.11473227997223 |
| 8.86249980190769 | 2.19079578328104 |
| 8.86499980185181 | 3.07996100480006 |
| 8.86749980179593 | 2.14197387474848 |
| 8.86999980174005 | 3.06971052134546 |
| 8.87249980168417 | 2.10871001826567 |
| 8.87499980162829 | 3.04674168964748 |
| 8.87749980157241 | 2.09135978341772 |
| 8.87999980151653 | 3.00579640840876 |
| 8.88249980146065 | 2.07027344527867 |
| 8.88499980140477 | 2.95710265833755 |
| 8.88749980134889 | 2.03723052528279 |
| 8.88999980129302 | 2.95759970044663 |
| 8.89249980123714 | 2.03608786691857 |
| 8.89499980118126 | 2.97006723327166 |
| 8.89749980112538 | 2.07883332476416 |
| 8.89999980106950 | 2.97840423361051 |
| 8.90249980101362 | 2.13527339944209 |
| 8.90499980095774 | 2.98011336521499 |
| 8.90749980090186 | 2.16202429756953 |
| 8.90999980084598 | 3.02003682968751 |
| 8.91249980079010 | 2.17048792531103 |
| 8.91499980073422 | 3.05690011035722 |
| 8.91749980067834 | 2.18524597640586 |
| 8.91999980062246 | 3.08096665775029 |
| 8.92249980056658 | 2.20624447109426 |
| 8.92499980051070 | 3.08314931965223 |
| 8.92749980045483 | 2.20229636644503 |
| 8.92999980039895 | 3.11251483756528 |
| 8.93249980034307 | 2.16438684133590 |
| 8.93499980028719 | 3.14584049741496 |
| 8.93749980023131 | 2.12892229832021 |
| 8.93999980017543 | 3.15884947506430 |
| 8.94249980011955 | 2.11648688073090 |
| 8.94499980006367 | 3.14307316132762 |
| 8.94749980000779 | 2.11747547390684 |
| 8.94999979995191 | 3.13845678428778 |
| 8.95249979989603 | 2.10991862365353 |
| 8.95499979984015 | 3.14452607297602 |
| 8.95749979978427 | 2.11142691780630 |
| 8.95999979972839 | 3.14229667503309 |
| 8.96249979967251 | 2.12772634979313 |
| 8.96499979961663 | 3.11199452183146 |
| 8.96749979956076 | 2.14963433790168 |
| 8.96999979950488 | 3.09774385297833 |
| 8.97249979944900 | 2.16292996835450 |
| 8.97499979939312 | 3.08623376040993 |
| 8.97749979933724 | 2.17467640158852 |
| 8.97999979928136 | 3.07439729119075 |
| 8.98249979922548 | 2.18235352162087 |



|                  |                  |
|------------------|------------------|
| 8.98499979916960 | 3.03389702031513 |
| 8.98749979911372 | 2.17724086468195 |
| 8.98999979905784 | 2.99888885215274 |
| 8.99249979900196 | 2.14724782381983 |
| 8.99499979894608 | 2.98948632360193 |
| 8.99749979889020 | 2.10992766704122 |
| 8.99999979883432 | 2.99214846094675 |
| 9.00249979877844 | 2.08228229679191 |
| 9.00499979872257 | 2.98639939996294 |
| 9.00749979866669 | 2.07139764566150 |
| 9.00999979861081 | 2.96160589602921 |
| 9.01249979855493 | 2.06148269122785 |
| 9.01499979849905 | 2.97749162602937 |
| 9.01749979844317 | 2.06637452567921 |
| 9.01999979838729 | 3.00502516310064 |
| 9.02249979833141 | 2.09385894724000 |
| 9.02499979827553 | 3.04104646862145 |
| 9.02749979821965 | 2.13288535128380 |
| 9.02999979816377 | 3.04798314684744 |
| 9.03249979810789 | 2.15414473874413 |
| 9.03499979805201 | 3.09622823217944 |
| 9.03749979799613 | 2.16943499866417 |
| 9.03999979794025 | 3.13203047166738 |
| 9.04249979788437 | 2.19780491579963 |
| 9.04499979782850 | 3.16498016913756 |
| 9.04749979777262 | 2.22902654898366 |
| 9.04999979771674 | 3.15180737127224 |
| 9.05249979766086 | 2.22997976207207 |
| 9.05499979760498 | 3.16005042482141 |
| 9.05749979754910 | 2.19391976502652 |
| 9.05999979749322 | 3.17332163307582 |
| 9.06249979743734 | 2.16349691674775 |
| 9.06499979738146 | 3.18005381986060 |
| 9.06749979732558 | 2.15503697107335 |
| 9.06999979726970 | 3.15188561360006 |
| 9.07249979721382 | 2.15097785622586 |
| 9.07499979715794 | 3.12082655760201 |
| 9.07749979710206 | 2.12018073515561 |
| 9.07999979704618 | 3.11099629025365 |
| 9.08249979699031 | 2.09217500313764 |
| 9.08499979693443 | 3.08767292620770 |
| 9.08749979687855 | 2.09399598789253 |
| 9.08999979682267 | 3.05036077694082 |
| 9.09249979676679 | 2.12248491508915 |
| 9.09499979671091 | 3.00394123535465 |
| 9.09749979665503 | 2.13309401767198 |
| 9.09999979659915 | 3.00553971355562 |
| 9.10249979654327 | 2.12538602972001 |
| 9.10499979648739 | 3.00237581633313 |
| 9.10749979643151 | 2.12003310755233 |
| 9.10999979637563 | 2.99819244876876 |
| 9.11249979631975 | 2.13367933040300 |

|                  |                  |
|------------------|------------------|
| 9.11499979626387 | 2.96559762231797 |
| 9.11749979620799 | 2.14387228186406 |
| 9.11999979615211 | 2.97810787461603 |
| 9.12249979609624 | 2.14620249598797 |
| 9.12499979604036 | 2.99123865927696 |
| 9.12749979598448 | 2.13637172825634 |
| 9.12999979592860 | 3.00806313190182 |
| 9.13249979587272 | 2.11792385475328 |
| 9.13499979581684 | 3.00744409877441 |
| 9.13749979576096 | 2.09598714654885 |
| 9.13999979570508 | 3.05067384889257 |
| 9.14249979564920 | 2.10041560307907 |
| 9.14499979559332 | 3.08671756060398 |
| 9.14749979553744 | 2.13546732393755 |
| 9.14999979548156 | 3.10643857087646 |
| 9.15249979542568 | 2.16526643553905 |
| 9.15499979536980 | 3.10539338376702 |
| 9.15749979531392 | 2.16339696339507 |
| 9.15999979525805 | 3.12881200396476 |
| 9.16249979520217 | 2.15840943712286 |
| 9.16499979514629 | 3.16738529110464 |
| 9.16749979509041 | 2.18456666806417 |
| 9.16999979503453 | 3.17689663385607 |
| 9.17249979497865 | 2.22035043326161 |
| 9.17499979492277 | 3.17006465048585 |
| 9.17749979486689 | 2.22614482241969 |
| 9.17999979481101 | 3.16182397898523 |
| 9.18249979475513 | 2.19808455501307 |
| 9.18499979469925 | 3.17493341867700 |
| 9.18749979464337 | 2.18054454356658 |
| 9.18999979458749 | 3.15102814611025 |
| 9.19249979453161 | 2.18194788854225 |
| 9.19499979447573 | 3.11618518860706 |
| 9.19749979441985 | 2.18411835607918 |
| 9.19999979436398 | 3.07438172262749 |
| 9.20249979430810 | 2.14962715834444 |
| 9.20499979425222 | 3.07044761084601 |
| 9.20749979419634 | 2.10702195494779 |
| 9.20999979414046 | 3.04866895708111 |
| 9.21249979408458 | 2.08383812046066 |
| 9.21499979402870 | 3.01623361279809 |
| 9.21749979397282 | 2.08995460126530 |
| 9.21999979391694 | 2.97550836315948 |
| 9.22249979386106 | 2.09420495123233 |
| 9.22499979380518 | 2.97131995976973 |
| 9.22749979374930 | 2.09861141595627 |
| 9.22999979369342 | 2.97428714346648 |
| 9.23249979363754 | 2.10672546726383 |
| 9.23499979358166 | 2.96806040769625 |
| 9.23749979352579 | 2.11892746022463 |
| 9.23999979346991 | 2.97385795155468 |
| 9.24249979341403 | 2.12618204075004 |

|                  |                  |
|------------------|------------------|
| 9.24499979335815 | 3.00945486794104 |
| 9.24749979330227 | 2.13778036854631 |
| 9.24999979324639 | 3.05012051937624 |
| 9.25249979319051 | 2.16033280360295 |
| 9.25499979313463 | 3.06579117140976 |
| 9.25749979307875 | 2.17808147746888 |
| 9.25999979302287 | 3.07065997106388 |
| 9.26249979296699 | 2.17695892886637 |
| 9.26499979291111 | 3.09676628852276 |
| 9.26749979285523 | 2.16631800372845 |
| 9.26999979279935 | 3.14285830587333 |
| 9.27249979274347 | 2.16929448036752 |
| 9.27499979268759 | 3.17014783878828 |
| 9.27749979263172 | 2.18043810233150 |
| 9.27999979257584 | 3.16404369884062 |
| 9.28249979251996 | 2.17758241449319 |
| 9.28499979246408 | 3.16334791908652 |
| 9.28749979240820 | 2.16032858816477 |
| 9.28999979235232 | 3.17768610171395 |
| 9.29249979229644 | 2.15882563459905 |
| 9.29499979224056 | 3.18311994860530 |
| 9.29749979218468 | 2.17397173977147 |
| 9.29999979212880 | 3.15353609007952 |
| 9.30249979207292 | 2.17988268951818 |
| 9.30499979201704 | 3.12754385627476 |
| 9.30749979196116 | 2.15642451312236 |
| 9.30999979190528 | 3.12955136739198 |
| 9.31249979184940 | 2.14191143111614 |
| 9.31499979179353 | 3.12403043984626 |
| 9.31749979173765 | 2.14980052003668 |
| 9.31999979168177 | 3.08837692363902 |
| 9.32249979162589 | 2.16437522142673 |
| 9.32499979157001 | 3.03512551197030 |
| 9.32749979151413 | 2.14777755047351 |
| 9.32999979145825 | 3.02139192037627 |
| 9.33249979140237 | 2.12646318939313 |
| 9.33499979134649 | 3.01259266334780 |
| 9.33749979129061 | 2.11922462261554 |
| 9.33999979123473 | 2.99860644746756 |
| 9.34249979117885 | 2.12355917103598 |
| 9.34499979112297 | 2.97156929396927 |
| 9.34749979106709 | 2.11104175228014 |
| 9.34999979101121 | 2.98624902709821 |
| 9.35249979095533 | 2.09278303807609 |
| 9.35499979089946 | 3.00040582854337 |
| 9.35749979084358 | 2.09605602263513 |
| 9.35999979078770 | 3.00842734334885 |
| 9.36249979073182 | 2.12231478897688 |
| 9.36499979067594 | 3.00351983208385 |
| 9.36749979062006 | 2.14570307144209 |
| 9.36999979056418 | 3.04244265221286 |
| 9.37249979050830 | 2.14955653284625 |

|                  |                  |
|------------------|------------------|
| 9.37499979045242 | 3.09322383219013 |
| 9.37749979039654 | 2.15403856756210 |
| 9.37999979034066 | 3.13341005340651 |
| 9.38249979028478 | 2.17233971150670 |
| 9.38499979022890 | 3.14516875851090 |
| 9.38749979017302 | 2.20038669934196 |
| 9.38999979011714 | 3.16615242220996 |
| 9.39249979006127 | 2.22206521772877 |
| 9.39499979000539 | 3.19557034940588 |
| 9.39749978994951 | 2.23793604416279 |
| 9.39999978989363 | 3.20928662062412 |
| 9.40249978983775 | 2.23764053817989 |
| 9.40499978978187 | 3.20342128542688 |
| 9.40749978972599 | 2.22167854343422 |
| 9.40999978967011 | 3.20452844503977 |
| 9.41249978961423 | 2.20063009061359 |
| 9.41499978955835 | 3.22351703644405 |
| 9.41749978950247 | 2.20008305637242 |
| 9.41999978944659 | 3.20575571530552 |
| 9.42249978939071 | 2.20218659677626 |
| 9.42499978933483 | 3.17638768554375 |
| 9.42749978927895 | 2.18269247612095 |
| 9.42999978922307 | 3.13165678818960 |
| 9.43249978916720 | 2.14240268560161 |
| 9.43499978911132 | 3.12493870824021 |
| 9.43749978905544 | 2.12697002819410 |
| 9.43999978899956 | 3.09682026500134 |
| 9.44249978894368 | 2.13472324508377 |
| 9.44499978888780 | 3.07332620571800 |
| 9.44749978883192 | 2.14039390678725 |
| 9.44999978877604 | 3.03710871743654 |
| 9.45249978872016 | 2.12339875086475 |
| 9.45499978866428 | 3.03522859289280 |
| 9.45749978860840 | 2.11689823603899 |
| 9.45999978855252 | 3.02146809830586 |
| 9.46249978849664 | 2.13723963502669 |
| 9.46499978844076 | 3.00172550646740 |
| 9.46749978838488 | 2.16883182281522 |
| 9.46999978832901 | 2.98666162853344 |
| 9.47249978827313 | 2.18182609593913 |
| 9.47499978821725 | 2.99610701614378 |
| 9.47749978816137 | 2.16884440073049 |
| 9.47999978810549 | 3.02722259707376 |
| 9.48249978804961 | 2.15792636673289 |
| 9.48499978799373 | 3.03972900876608 |
| 9.48749978793785 | 2.15842633431072 |
| 9.48999978788197 | 3.06147701812589 |
| 9.49249978782609 | 2.17087136680389 |
| 9.49499978777021 | 3.06970090753969 |
| 9.49749978771433 | 2.17079528433636 |
| 9.49999978765845 | 3.11032577215571 |
| 9.50249978760257 | 2.17010926481502 |

|                  |                  |
|------------------|------------------|
| 9.50499978754669 | 3.11996891881666 |
| 9.50749978749081 | 2.16708357758371 |
| 9.50999978743494 | 3.14129515330604 |
| 9.51249978737906 | 2.17167062607984 |
| 9.51499978732318 | 3.15947929543414 |
| 9.51749978726730 | 2.17611192544800 |
| 9.51999978721142 | 3.20136184332809 |
| 9.52249978715554 | 2.19379896406462 |
| 9.52499978709966 | 3.21311088924130 |
| 9.52749978704378 | 2.21353916069176 |
| 9.52999978698790 | 3.20884931857917 |
| 9.53249978693202 | 2.22801168132508 |
| 9.53499978687614 | 3.20110995199072 |
| 9.53749978682026 | 2.23472414040593 |
| 9.53999978676438 | 3.20059216465407 |
| 9.54249978670850 | 2.24617662951625 |
| 9.54499978665262 | 3.20127091429732 |
| 9.54749978659675 | 2.25360861179043 |
| 9.54999978654087 | 3.17773600218332 |
| 9.55249978648499 | 2.24515996957656 |
| 9.55499978642911 | 3.15898395576109 |
| 9.55749978637323 | 2.22165020572321 |
| 9.55999978631735 | 3.13677409081384 |
| 9.56249978626147 | 2.20139925496808 |
| 9.56499978620559 | 3.12267861526831 |
| 9.56749978614971 | 2.19177814378874 |
| 9.56999978609383 | 3.07695107158580 |
| 9.57249978603795 | 2.17640145009761 |
| 9.57499978598207 | 3.04207646030980 |
| 9.57749978592619 | 2.14541964549992 |
| 9.57999978587031 | 3.01424242548356 |
| 9.58249978581443 | 2.11179588296241 |
| 9.58499978575855 | 3.01377237620694 |
| 9.58749978570268 | 2.10295722648774 |
| 9.58999978564680 | 3.00114735475634 |
| 9.59249978559092 | 2.10869088762151 |
| 9.59499978553504 | 2.99602853772023 |
| 9.59749978547916 | 2.11639925808861 |
| 9.59999978542328 | 2.99790127660552 |
| 9.60249978536740 | 2.12232162630267 |
| 9.60499978531152 | 3.01740956825337 |
| 9.60749978525564 | 2.15039685745632 |
| 9.60999978519976 | 3.02605504236886 |
| 9.61249978514388 | 2.18353486658079 |
| 9.61499978508800 | 3.03457648954941 |
| 9.61749978503212 | 2.20683740070264 |
| 9.61999978497624 | 3.06683514332773 |
| 9.62249978492036 | 2.20461082046265 |
| 9.62499978486449 | 3.11105773243024 |
| 9.62749978480861 | 2.20491575984163 |
| 9.62999978475273 | 3.13619610270165 |
| 9.63249978469685 | 2.21241449262407 |

|                  |                  |
|------------------|------------------|
| 9.63499978464097 | 3.13789949590901 |
| 9.63749978458509 | 2.22449328463293 |
| 9.63999978452921 | 3.14688986099101 |
| 9.64249978447333 | 2.22199912430046 |
| 9.64499978441745 | 3.16025411198483 |
| 9.64749978436157 | 2.20747555717272 |
| 9.64999978430569 | 3.16916935098111 |
| 9.65249978424981 | 2.18326165130637 |
| 9.65499978419393 | 3.16148325973189 |
| 9.65749978413805 | 2.16481346726086 |
| 9.65999978408217 | 3.16087203384209 |
| 9.66249978402629 | 2.15874682138874 |
| 9.66499978397042 | 3.16091693703425 |
| 9.66749978391454 | 2.16711923166262 |
| 9.66999978385866 | 3.14930521095812 |
| 9.67249978380278 | 2.17473305254737 |
| 9.67499978374690 | 3.11800117463624 |
| 9.67749978369102 | 2.17061092126295 |
| 9.67999978363514 | 3.09226559237802 |
| 9.68249978357926 | 2.16351091207001 |
| 9.68499978352338 | 3.08221861749958 |
| 9.68749978346750 | 2.16902623498887 |
| 9.68999978341162 | 3.07086079838390 |
| 9.69249978335574 | 2.18603244677429 |
| 9.69499978329986 | 3.04849188852554 |
| 9.69749978324398 | 2.18575886076049 |
| 9.69999978318810 | 3.03553358333111 |
| 9.70249978313223 | 2.16860896172085 |
| 9.70499978307635 | 3.02316834506152 |
| 9.70749978302047 | 2.15156081450978 |
| 9.70999978296459 | 3.01522172440320 |
| 9.71249978290871 | 2.15450732592883 |
| 9.71499978285283 | 2.99826177664743 |
| 9.71749978279695 | 2.15211991853173 |
| 9.71999978274107 | 3.00041385885664 |
| 9.72249978268519 | 2.13577458383112 |
| 9.72499978262931 | 3.01448037213099 |
| 9.72749978257343 | 2.10666253233925 |
| 9.72999978251755 | 3.04268950259240 |
| 9.73249978246167 | 2.10228750386073 |
| 9.73499978240579 | 3.05529073511409 |
| 9.73749978234991 | 2.12029768510957 |
| 9.73999978229403 | 3.07235911663155 |
| 9.74249978223816 | 2.15079606004963 |
| 9.74499978218228 | 3.08865368838496 |
| 9.74749978212640 | 2.16655351181687 |
| 9.74999978207052 | 3.11384505138920 |
| 9.75249978201464 | 2.17746167404343 |
| 9.75499978195876 | 3.12750935144597 |
| 9.75749978190288 | 2.18553534012379 |
| 9.75999978184700 | 3.14621787441016 |
| 9.76249978179112 | 2.20126245294172 |



|                  |                  |
|------------------|------------------|
| 9.76499978173524 | 3.16404320468353 |
| 9.76749978167936 | 2.21327142368486 |
| 9.76999978162348 | 3.17142063867693 |
| 9.77249978156760 | 2.21719176377101 |
| 9.77499978151172 | 3.17052827841813 |
| 9.77749978145584 | 2.20946865019285 |
| 9.77999978139997 | 3.14008167228274 |
| 9.78249978134409 | 2.19275898263193 |
| 9.78499978128821 | 3.12438701330325 |
| 9.78749978123233 | 2.17105262923357 |
| 9.78999978117645 | 3.10638474650276 |
| 9.79249978112057 | 2.14747099515011 |
| 9.79499978106469 | 3.10583032920441 |
| 9.79749978100881 | 2.12803043893080 |
| 9.79999978095293 | 3.07005822540827 |
| 9.80249978089705 | 2.10420156924782 |
| 9.80499978084117 | 3.05623239331108 |
| 9.80749978078529 | 2.09200479418428 |
| 9.80999978072941 | 3.03173430850561 |
| 9.81249978067353 | 2.09975865577094 |
| 9.81499978061765 | 3.02641157621629 |
| 9.81749978056177 | 2.12857367895359 |
| 9.81999978050590 | 3.00310915636045 |
| 9.82249978045002 | 2.14372250192277 |
| 9.82499978039414 | 3.00038732560098 |
| 9.82749978033826 | 2.14747728218764 |
| 9.82999978028238 | 3.01443157949787 |
| 9.83249978022650 | 2.15019806051024 |
| 9.83499978017062 | 3.03883527904574 |
| 9.83749978011474 | 2.17163993030590 |
| 9.83999978005886 | 3.05008219371790 |
| 9.84249978000298 | 2.18811157488278 |
| 9.84499977994710 | 3.04401640285561 |
| 9.84749977989122 | 2.18208115756243 |
| 9.84999977983534 | 3.06553569505282 |
| 9.85249977977946 | 2.15770629387621 |
| 9.85499977972358 | 3.07662537794903 |
| 9.85749977966771 | 2.14736579061463 |
| 9.85999977961183 | 3.09935005958362 |
| 9.86249977955595 | 2.14575995848580 |
| 9.86499977950007 | 3.10226851752649 |
| 9.86749977944419 | 2.13745313412528 |
| 9.86999977938831 | 3.13822307501347 |
| 9.87249977933243 | 2.12026253911043 |
| 9.87499977927655 | 3.14883565270387 |
| 9.87749977922067 | 2.12112818571934 |
| 9.87999977916479 | 3.16038573035856 |
| 9.88249977910891 | 2.14571531593802 |
| 9.88499977905303 | 3.13956875753407 |
| 9.88749977899715 | 2.17681021477964 |
| 9.88999977894127 | 3.14489358906959 |
| 9.89249977888539 | 2.19176605083435 |



|                  |                  |
|------------------|------------------|
| 9.89499977882951 | 3.15224665379155 |
| 9.89749977877364 | 2.19305384162952 |
| 9.89999977871776 | 3.15650899514210 |
| 9.90249977866188 | 2.19084800889907 |
| 9.90499977860600 | 3.13656462528193 |
| 9.90749977855012 | 2.18777848766506 |
| 9.90999977849424 | 3.12124222944231 |
| 9.91249977843836 | 2.18633902078657 |
| 9.91499977838248 | 3.10358097903664 |
| 9.91749977832660 | 2.18044459917559 |
| 9.91999977827072 | 3.06985868742879 |
| 9.92249977821484 | 2.16049156722099 |
| 9.92499977815896 | 3.03444448668698 |
| 9.92749977810308 | 2.11889609404779 |
| 9.92999977804720 | 3.00936048078342 |
| 9.93249977799132 | 2.08199626929277 |
| 9.93499977793545 | 3.02167281108097 |
| 9.93749977787957 | 2.06958515154825 |
| 9.93999977782369 | 3.01639786390755 |
| 9.94249977776781 | 2.08493384591526 |
| 9.94499977771193 | 3.01255610981007 |
| 9.94749977765605 | 2.09613633403865 |
| 9.94999977760017 | 3.00014876223913 |
| 9.95249977754429 | 2.10346056022879 |
| 9.95499977748841 | 3.03016151442048 |
| 9.95749977743253 | 2.12488462263837 |
| 9.95999977737665 | 3.04582843381632 |
| 9.96249977732077 | 2.16881537361690 |
| 9.96499977726489 | 3.06683599643297 |
| 9.96749977720901 | 2.19536517660388 |
| 9.96999977715313 | 3.08635616270190 |
| 9.97249977709725 | 2.19065156162225 |
| 9.97499977704138 | 3.13512328828278 |
| 9.97749977698550 | 2.17675909735414 |
| 9.97999977692962 | 3.15282875838968 |
| 9.98249977687374 | 2.18260060996372 |
| 9.98499977681786 | 3.15207896640709 |
| 9.98749977676198 | 2.19145346252436 |
| 9.98999977670610 | 3.14059866535299 |
| 9.99249977665022 | 2.18121825947726 |
| 9.99499977659434 | 3.14873385211135 |
| 9.99749977653846 | 2.14653064092176 |
| 9.99999977648258 | 3.15795823797656 |
| 10.0024997764267 | 2.11783705388233 |
| 10.0049997763708 | 3.14870434876903 |
| 10.0074997763149 | 2.10702370158738 |
| 10.0099997762591 | 3.13428884147664 |
| 10.0124997762032 | 2.11193467054855 |
| 10.0149997761473 | 3.12440675024300 |
| 10.0174997760914 | 2.12311044262210 |
| 10.0199997760355 | 3.11485691017790 |
| 10.0224997759797 | 2.13814708631118 |

|                  |                  |
|------------------|------------------|
| 10.0249997759238 | 3.08670055439315 |
| 10.0274997758679 | 2.14913296304300 |
| 10.0299997758120 | 3.05992531635872 |
| 10.0324997757562 | 2.15105125693508 |
| 10.0349997757003 | 3.05419359744205 |
| 10.0374997756444 | 2.15211232400379 |
| 10.0399997755885 | 3.05717585897655 |
| 10.0424997755326 | 2.15163757484247 |
| 10.0449997754768 | 3.04666559103325 |
| 10.0474997754209 | 2.15059985595949 |
| 10.0499997753650 | 3.02814495392955 |
| 10.0524997753091 | 2.13670681202663 |
| 10.0549997752532 | 3.00893079209891 |
| 10.0574997751974 | 2.12044138360790 |
| 10.0599997751415 | 3.01088263840688 |
| 10.0624997750856 | 2.10548582082355 |
| 10.0649997750297 | 3.01861309561626 |
| 10.0674997749738 | 2.10137767698860 |
| 10.0699997749180 | 3.03001563826558 |
| 10.0724997748621 | 2.09006923822657 |
| 10.0749997748062 | 3.04026389311093 |
| 10.0774997747503 | 2.08407341787903 |
| 10.0799997746944 | 3.07667747456733 |
| 10.0824997746386 | 2.10070931652954 |
| 10.0849997745827 | 3.09631938289738 |
| 10.0874997745268 | 2.14485182755266 |
| 10.0899997744709 | 3.11437560317008 |
| 10.0924997744150 | 2.18075554006702 |
| 10.0949997743592 | 3.11538928059881 |
| 10.0974997743033 | 2.18951229584764 |
| 10.0999997742474 | 3.14720083445989 |
| 10.1024997741915 | 2.18534779498138 |
| 10.1049997741356 | 3.16548722522900 |
| 10.1074997740798 | 2.19393853922324 |
| 10.1099997740239 | 3.18121173921542 |
| 10.1124997739680 | 2.20619421259439 |
| 10.1149997739121 | 3.16080654043964 |
| 10.1174997738563 | 2.19587372464038 |
| 10.1199997738004 | 3.15402707321894 |
| 10.1224997737445 | 2.16285143048731 |
| 10.1249997736886 | 3.13805540698726 |
| 10.1274997736327 | 2.13720148081878 |
| 10.1299997735769 | 3.11188990732400 |
| 10.1324997735210 | 2.12454329989035 |
| 10.1349997734651 | 3.07458111640692 |
| 10.1374997734092 | 2.10778099849510 |
| 10.1399997733533 | 3.05826602403748 |
| 10.1424997732975 | 2.08117529845830 |
| 10.1449997732416 | 3.06062140108067 |
| 10.1474997731857 | 2.06853122716796 |
| 10.1499997731298 | 3.03997373578556 |
| 10.1524997730739 | 2.08510987513104 |

|                  |                  |
|------------------|------------------|
| 10.1549997730181 | 3.02249687169433 |
| 10.1574997729622 | 2.11800766902790 |
| 10.1599997729063 | 3.00103700645010 |
| 10.1624997728504 | 2.14823988737036 |
| 10.1649997727945 | 3.02052603444979 |
| 10.1674997727387 | 2.16395525217875 |
| 10.1699997726828 | 3.01917145496525 |
| 10.1724997726269 | 2.16825776092881 |
| 10.1749997725710 | 3.03712552872268 |
| 10.1774997725151 | 2.16223775771028 |
| 10.1799997724593 | 3.04143469342661 |
| 10.1824997724034 | 2.16035755703471 |
| 10.1849997723475 | 3.07505874258005 |
| 10.1874997722916 | 2.16218445584390 |
| 10.1899997722358 | 3.07477826908283 |
| 10.1924997721799 | 2.15826521473937 |
| 10.1949997721240 | 3.07733311529643 |
| 10.1974997720681 | 2.12813803054971 |
| 10.1999997720122 | 3.07727754244966 |
| 10.2024997719564 | 2.09606366304199 |
| 10.2049997719005 | 3.10691066367686 |
| 10.2074997718446 | 2.09017847997988 |
| 10.2099997717887 | 3.12507164162712 |
| 10.2124997717328 | 2.11803565531603 |
| 10.2149997716770 | 3.13052101056965 |
| 10.2174997716211 | 2.13750170297991 |
| 10.2199997715652 | 3.13659338606250 |
| 10.2224997715093 | 2.13763297229693 |
| 10.2249997714534 | 3.15021410383453 |
| 10.2274997713976 | 2.14719667711111 |
| 10.2299997713417 | 3.15946504314101 |
| 10.2324997712858 | 2.18734027477780 |
| 10.2349997712299 | 3.13686015498205 |
| 10.2374997711740 | 2.22118010463852 |
| 10.2399997711182 | 3.12857034785683 |
| 10.2424997710623 | 2.21757215131910 |
| 10.2449997710064 | 3.12208917407975 |
| 10.2474997709505 | 2.18655849051060 |
| 10.2499997708946 | 3.12548552409590 |
| 10.2524997708388 | 2.16200815472144 |
| 10.2549997707829 | 3.08282074991898 |
| 10.2574997707270 | 2.14602315603490 |
| 10.2599997706711 | 3.05333033384811 |
| 10.2624997706152 | 2.12638633171609 |
| 10.2649997705594 | 3.02154090583497 |
| 10.2674997705035 | 2.09445405875541 |
| 10.2699997704476 | 3.01703647550788 |
| 10.2724997703917 | 2.06111155838300 |
| 10.2749997703359 | 2.99328006670174 |
| 10.2774997702800 | 2.04521256875807 |
| 10.2799997702241 | 2.99235236671853 |
| 10.2824997701682 | 2.05476156864513 |

|                  |                  |
|------------------|------------------|
| 10.2849997701123 | 3.00430108881949 |
| 10.2874997700565 | 2.09253217413592 |
| 10.2899997700006 | 3.03133154067004 |
| 10.2924997699447 | 2.13721258255935 |
| 10.2949997698888 | 3.04391351381918 |
| 10.2974997698329 | 2.17373824002638 |
| 10.2999997697771 | 3.05422250004318 |
| 10.3024997697212 | 2.18849058592858 |
| 10.3049997696653 | 3.08486912540516 |
| 10.3074997696094 | 2.20093514246876 |
| 10.3099997695535 | 3.11816977880711 |
| 10.3124997694977 | 2.20882077787447 |
| 10.3149997694418 | 3.14280037168415 |
| 10.3174997693859 | 2.20958646146332 |
| 10.3199997693300 | 3.14080774928759 |
| 10.3224997692741 | 2.18015913117506 |
| 10.3249997692183 | 3.14594315500137 |
| 10.3274997691624 | 2.13950560702327 |
| 10.3299997691065 | 3.14336480550540 |
| 10.3324997690506 | 2.11013221083443 |
| 10.3349997689947 | 3.14157888755415 |
| 10.3374997689389 | 2.10624659903725 |
| 10.3399997688830 | 3.12292083471932 |
| 10.3424997688271 | 2.09753669857812 |
| 10.3449997687712 | 3.11262763374966 |
| 10.3474997687154 | 2.07894767053454 |
| 10.3499997686595 | 3.11227004008344 |
| 10.3524997686036 | 2.08082121889244 |
| 10.3549997685477 | 3.11005245068729 |
| 10.3574997684918 | 2.12032953468229 |
| 10.3599997684360 | 3.08918174221298 |
| 10.3624997683801 | 2.16869650896316 |
| 10.3649997683242 | 3.06821411500518 |
| 10.3674997682683 | 2.19313221850325 |
| 10.3699997682124 | 3.05684182874188 |
| 10.3724997681566 | 2.19403301830146 |
| 10.3749997681007 | 3.05478439097279 |
| 10.3774997680448 | 2.18506494914865 |
| 10.3799997679889 | 3.04056087673672 |
| 10.3824997679330 | 2.17062979953791 |
| 10.3849997678772 | 3.02902464690038 |
| 10.3874997678213 | 2.14166505681491 |
| 10.3899997677654 | 3.01786763876102 |
| 10.3924997677095 | 2.10355082892950 |
| 10.3949997676536 | 3.01738574714106 |
| 10.3974997675978 | 2.06944843203256 |
| 10.3999997675419 | 3.00344866965227 |
| 10.4024997674860 | 2.05497035376620 |
| 10.4049997674301 | 2.99917553340797 |
| 10.4074997673742 | 2.05087893453831 |
| 10.4099997673184 | 3.02063061215717 |
| 10.4124997672625 | 2.06251435381769 |

|                  |                  |
|------------------|------------------|
| 10.4149997672066 | 3.07033412152147 |
| 10.4174997671507 | 2.09324782735872 |
| 10.4199997670949 | 3.09648960423558 |
| 10.4224997670390 | 2.14111606226799 |
| 10.4249997669831 | 3.11447128715116 |
| 10.4274997669272 | 2.18410322985636 |
| 10.4299997668713 | 3.13743109338643 |
| 10.4324997668155 | 2.22321248327302 |
| 10.4349997667596 | 3.16965754841560 |
| 10.4374997667037 | 2.25003410186157 |
| 10.4399997666478 | 3.17955067244178 |
| 10.4424997665919 | 2.25695650233871 |
| 10.4449997665361 | 3.16910416867512 |
| 10.4474997664802 | 2.22546336167954 |
| 10.4499997664243 | 3.17230205256356 |
| 10.4524997663684 | 2.18129925732280 |
| 10.4549997663125 | 3.17275147898256 |
| 10.4574997662567 | 2.14757961912545 |
| 10.4599997662008 | 3.15300984154728 |
| 10.4624997661449 | 2.12664885043512 |
| 10.4649997660890 | 3.09699734597335 |
| 10.4674997660331 | 2.08677951794553 |
| 10.4699997659773 | 3.06183973880313 |
| 10.4724997659214 | 2.03930660092518 |
| 10.4749997658655 | 3.04673495048814 |
| 10.4774997658096 | 2.03038603833729 |
| 10.4799997657537 | 3.03972760306265 |
| 10.4824997656979 | 2.06930312558624 |
| 10.4849997656420 | 3.01047999284865 |
| 10.4874997655861 | 2.11418985157601 |
| 10.4899997655302 | 3.01155792973106 |
| 10.4924997654743 | 2.13733053587787 |
| 10.4949997654185 | 3.01972804192927 |
| 10.4974997653626 | 2.16114980899752 |
| 10.4999997653067 | 3.03621094105762 |
| 10.5024997652508 | 2.19372846584371 |
| 10.5049997651950 | 3.01918385110778 |
| 10.5074997651391 | 2.21890712034123 |
| 10.5099997650832 | 3.02137101337092 |
| 10.5124997650273 | 2.20034554955761 |
| 10.5149997649714 | 3.04365329304325 |
| 10.5174997649156 | 2.15310419839078 |
| 10.5199997648597 | 3.07467818738856 |
| 10.5224997648038 | 2.10678663030052 |
| 10.5249997647479 | 3.07479880237423 |
| 10.5274997646920 | 2.08631352360713 |
| 10.5299997646362 | 3.06763228380750 |
| 10.5324997645803 | 2.07378189402864 |
| 10.5349997645244 | 3.08322614950590 |
| 10.5374997644685 | 2.07046484902352 |
| 10.5399997644126 | 3.10868736701441 |
| 10.5424997643568 | 2.07829766916051 |

|                  |                  |
|------------------|------------------|
| 10.5449997643009 | 3.11958593764397 |
| 10.5474997642450 | 2.10380136354766 |
| 10.5499997641891 | 3.11919794901350 |
| 10.5524997641332 | 2.13415183518207 |
| 10.5549997640774 | 3.14986230177606 |
| 10.5574997640215 | 2.17733187794052 |
| 10.5599997639656 | 3.16594891871189 |
| 10.5624997639097 | 2.21956416422189 |
| 10.5649997638538 | 3.17307996946642 |
| 10.5674997637980 | 2.24490884944244 |
| 10.5699997637421 | 3.13592479820371 |
| 10.5724997636862 | 2.23308714912182 |
| 10.5749997636303 | 3.13075504625530 |
| 10.5774997635745 | 2.20558081098948 |
| 10.5799997635186 | 3.11502488711487 |
| 10.5824997634627 | 2.17695488132138 |
| 10.5849997634068 | 3.10079643342336 |
| 10.5874997633509 | 2.14643082450332 |
| 10.5899997632951 | 3.05181464445336 |
| 10.5924997632392 | 2.09471180068166 |
| 10.5949997631833 | 3.02256798162258 |
| 10.5974997631274 | 2.03466729564565 |
| 10.5999997630715 | 3.00759529171496 |
| 10.6024997630157 | 2.01514584345575 |
| 10.6049997629598 | 2.99379269614264 |
| 10.6074997629039 | 2.04314639095783 |
| 10.6099997628480 | 2.97826010903732 |
| 10.6124997627921 | 2.08634916210758 |
| 10.6149997627363 | 2.98039474725832 |
| 10.6174997626804 | 2.10618793237474 |
| 10.6199997626245 | 3.02157236577663 |
| 10.6224997625686 | 2.13429783783496 |
| 10.6249997625127 | 3.05184753222061 |
| 10.6274997624569 | 2.17458431751542 |
| 10.6299997624010 | 3.07318723154871 |
| 10.6324997623451 | 2.21898420594019 |
| 10.6349997622892 | 3.07510933589116 |
| 10.6374997622333 | 2.22382164012697 |
| 10.6399997621775 | 3.11119574887743 |
| 10.6424997621216 | 2.20391517548861 |
| 10.6449997620657 | 3.12950845028337 |
| 10.6474997620098 | 2.17221922201674 |
| 10.6499997619539 | 3.13734474127247 |
| 10.6524997618981 | 2.14775970456031 |
| 10.6549997618422 | 3.12586944988254 |
| 10.6574997617863 | 2.11452689483085 |
| 10.6599997617304 | 3.13968209608361 |
| 10.6624997616746 | 2.08498134729570 |
| 10.6649997616187 | 3.14717415319299 |
| 10.6674997615628 | 2.07535654146294 |
| 10.6699997615069 | 3.12875493318476 |
| 10.6724997614510 | 2.08756293312777 |



|                  |                  |
|------------------|------------------|
| 10.6749997613952 | 3.09742697153541 |
| 10.6774997613393 | 2.10348314423506 |
| 10.6799997612834 | 3.09295371284909 |
| 10.6824997612275 | 2.12429319739390 |
| 10.6849997611716 | 3.11142091763361 |
| 10.6874997611158 | 2.15569588130492 |
| 10.6899997610599 | 3.10602089091075 |
| 10.6924997610040 | 2.18330274135998 |
| 10.6949997609481 | 3.07640044373177 |
| 10.6974997608922 | 2.19066697096797 |
| 10.6999997608364 | 3.06335182712874 |
| 10.7024997607805 | 2.18368197674524 |
| 10.7049997607246 | 3.06228636755758 |
| 10.7074997606687 | 2.18003748346995 |
| 10.7099997606128 | 3.04228311362651 |
| 10.7124997605570 | 2.16513245805470 |
| 10.7149997605011 | 3.00422587581710 |
| 10.7174997604452 | 2.12380567043668 |
| 10.7199997603893 | 2.98812016672774 |
| 10.7224997603334 | 2.06328256084934 |
| 10.7249997602776 | 3.00863134833017 |
| 10.7274997602217 | 2.04268340771276 |
| 10.7299997601658 | 3.01715564715147 |
| 10.7324997601099 | 2.06109805743783 |
| 10.7349997600541 | 3.00629621767882 |
| 10.7374997599982 | 2.08641320161539 |
| 10.7399997599423 | 3.00910684136406 |
| 10.7424997598864 | 2.08905671696342 |
| 10.7449997598305 | 3.05058208180881 |
| 10.7474997597747 | 2.11659090510944 |
| 10.7499997597188 | 3.08635879355868 |
| 10.7524997596629 | 2.16562966782250 |
| 10.7549997596070 | 3.10024592374621 |
| 10.7574997595511 | 2.21256423998627 |
| 10.7599997594953 | 3.11947957447649 |
| 10.7624997594394 | 2.21758168937900 |
| 10.7649997593835 | 3.15971423109448 |
| 10.7674997593276 | 2.20528224120995 |
| 10.7699997592717 | 3.18386191668546 |
| 10.7724997592159 | 2.19964630489677 |
| 10.7749997591600 | 3.17207526270201 |
| 10.7774997591041 | 2.20344849356163 |
| 10.7799997590482 | 3.14741287422940 |
| 10.7824997589923 | 2.18546889411792 |
| 10.7849997589365 | 3.14192349315909 |
| 10.7874997588806 | 2.14084254973527 |
| 10.7899997588247 | 3.14483925292772 |
| 10.7924997587688 | 2.09958456306027 |
| 10.7949997587129 | 3.12280397929377 |
| 10.7974997586571 | 2.08349592817721 |
| 10.7999997586012 | 3.08186774191463 |
| 10.8024997585453 | 2.08784763150595 |



|                  |                  |
|------------------|------------------|
| 10.8049997584894 | 3.05982250174696 |
| 10.8074997584336 | 2.09799905499025 |
| 10.8099997583777 | 3.04967529478697 |
| 10.8124997583218 | 2.11646118880952 |
| 10.8149997582659 | 3.03669571225979 |
| 10.8174997582100 | 2.13313490718918 |
| 10.8199997581542 | 3.00244265874254 |
| 10.8224997580983 | 2.14620973010328 |
| 10.8249997580424 | 3.00572390378458 |
| 10.8274997579865 | 2.15158324921928 |
| 10.8299997579306 | 3.01739552720869 |
| 10.8324997578748 | 2.16716229690395 |
| 10.8349997578189 | 3.02868251666694 |
| 10.8374997577630 | 2.17422287050178 |
| 10.8399997577071 | 3.01098467593975 |
| 10.8424997576512 | 2.16214357600715 |
| 10.8449997575954 | 3.00817447506125 |
| 10.8474997575395 | 2.12729669524563 |
| 10.8499997574836 | 3.02989771130809 |
| 10.8524997574277 | 2.11471750127221 |
| 10.8549997573718 | 3.05814555738179 |
| 10.8574997573160 | 2.11847306576458 |
| 10.8599997572601 | 3.07032145841979 |
| 10.8624997572042 | 2.12364562505330 |
| 10.8649997571483 | 3.07748223178932 |
| 10.8674997570924 | 2.10672404057698 |
| 10.8699997570366 | 3.11376890326996 |
| 10.8724997569807 | 2.10951833442092 |
| 10.8749997569248 | 3.14034596439660 |
| 10.8774997568689 | 2.14534113307161 |
| 10.8799997568130 | 3.15313017014601 |
| 10.8824997567572 | 2.19725788116143 |
| 10.8849997567013 | 3.14245670280944 |
| 10.8874997566454 | 2.21343309807073 |
| 10.8899997565895 | 3.16657130048654 |
| 10.8924997565337 | 2.20231051277948 |
| 10.8949997564778 | 3.18577045216193 |
| 10.8974997564219 | 2.19928618865395 |
| 10.8999997563660 | 3.19248154987558 |
| 10.9024997563101 | 2.21522667920486 |
| 10.9049997562543 | 3.15298756887511 |
| 10.9074997561984 | 2.22180763112944 |
| 10.9099997561425 | 3.12929386475511 |
| 10.9124997560866 | 2.19715066302905 |
| 10.9149997560307 | 3.11165332101007 |
| 10.9174997559749 | 2.16678443601596 |
| 10.9199997559190 | 3.08848401352039 |
| 10.9224997558631 | 2.14045601042465 |
| 10.9249997558072 | 3.04556193537991 |
| 10.9274997557513 | 2.12366849075132 |
| 10.9299997556955 | 3.02109049514741 |
| 10.9324997556396 | 2.09757159804260 |

|                  |                  |
|------------------|------------------|
| 10.9349997555837 | 3.02045484484341 |
| 10.9374997555278 | 2.08911877074761 |
| 10.9399997554719 | 3.01059359371503 |
| 10.9424997554161 | 2.09539036072637 |
| 10.9449997553602 | 2.98781472465781 |
| 10.9474997553043 | 2.11889203962731 |
| 10.9499997552484 | 2.97532166616166 |
| 10.9524997551925 | 2.13215246338084 |
| 10.9549997551367 | 3.00731425968238 |
| 10.9574997550808 | 2.15484676433592 |
| 10.9599997550249 | 3.03811405892109 |
| 10.9624997549690 | 2.17462255911273 |
| 10.9649997549132 | 3.06198221054418 |
| 10.9674997548573 | 2.19461347085837 |
| 10.9699997548014 | 3.07243744991188 |
| 10.9724997547455 | 2.20106730276496 |
| 10.9749997546896 | 3.11106846055579 |
| 10.9774997546338 | 2.21383893463572 |
| 10.9799997545779 | 3.13273284947201 |
| 10.9824997545220 | 2.22469786646142 |
| 10.9849997544661 | 3.14535010992958 |
| 10.9874997544102 | 2.22304457989241 |
| 10.9899997543544 | 3.14102360156224 |
| 10.9924997542985 | 2.19567254402495 |
| 10.9949997542426 | 3.16545431515588 |
| 10.9974997541867 | 2.16772164127247 |
| 10.9999997541308 | 3.18354118952103 |
| 11.0024997540750 | 2.16060936962076 |
| 11.0049997540191 | 3.18136980064830 |
| 11.0074997539632 | 2.15907285815787 |
| 11.0099997539073 | 3.15826112274999 |
| 11.0124997538514 | 2.14097394310603 |
| 11.0149997537956 | 3.14705098288604 |
| 11.0174997537397 | 2.11744213141280 |
| 11.0199997536838 | 3.14392375479432 |
| 11.0224997536279 | 2.12602515862372 |
| 11.0249997535720 | 3.12051904355045 |
| 11.0274997535162 | 2.14456935504777 |
| 11.0299997534603 | 3.09624495443901 |
| 11.0324997534044 | 2.15351971594713 |
| 11.0349997533485 | 3.08234965354127 |
| 11.0374997532926 | 2.14021535916038 |
| 11.0399997532368 | 3.08459025087709 |
| 11.0424997531809 | 2.14739926409692 |
| 11.0449997531250 | 3.06101191688272 |
| 11.0474997530691 | 2.16380572641839 |
| 11.0499997530133 | 3.03090058218527 |
| 11.0524997529574 | 2.18396310088083 |
| 11.0549997529015 | 3.00350268530011 |
| 11.0574997528456 | 2.17049073701272 |
| 11.0599997527897 | 3.00832601258125 |
| 11.0624997527339 | 2.14312884316576 |

|                  |                  |
|------------------|------------------|
| 11.0649997526780 | 3.01248694490549 |
| 11.0674997526221 | 2.11143135371932 |
| 11.0699997525662 | 3.01364554013441 |
| 11.0724997525103 | 2.10074409838681 |
| 11.0749997524545 | 3.01594314514531 |
| 11.0774997523986 | 2.09860508037196 |
| 11.0799997523427 | 3.03678128596644 |
| 11.0824997522868 | 2.10104636136260 |
| 11.0849997522309 | 3.06424982807424 |
| 11.0874997521751 | 2.10635138345861 |
| 11.0899997521192 | 3.07534591861761 |
| 11.0924997520633 | 2.11454397518023 |
| 11.0949997520074 | 3.09252966794403 |
| 11.0974997519515 | 2.12973731436649 |
| 11.0999997518957 | 3.12893168626913 |
| 11.1024997518398 | 2.15445525834467 |
| 11.1049997517839 | 3.17439523197254 |
| 11.1074997517280 | 2.19421709869261 |
| 11.1099997516721 | 3.19042695843268 |
| 11.1124997516163 | 2.21752096093769 |
| 11.1149997515604 | 3.18502600537374 |
| 11.1174997515045 | 2.21551261629809 |
| 11.1199997514486 | 3.18937601843542 |
| 11.1224997513928 | 2.20472651706328 |
| 11.1249997513369 | 3.19763495295914 |
| 11.1274997512810 | 2.21681084882067 |
| 11.1299997512251 | 3.18476364621961 |
| 11.1324997511692 | 2.21520497418952 |
| 11.1349997511134 | 3.15064266800124 |
| 11.1374997510575 | 2.17879083958167 |
| 11.1399997510016 | 3.13350240556697 |
| 11.1424997509457 | 2.11670844350610 |
| 11.1449997508898 | 3.12472890562525 |
| 11.1474997508340 | 2.09002990167198 |
| 11.1499997507781 | 3.10016894776946 |
| 11.1524997507222 | 2.09438416147611 |
| 11.1549997506663 | 3.04919544126283 |
| 11.1574997506104 | 2.10448906680030 |
| 11.1599997505546 | 3.01898978636513 |
| 11.1624997504987 | 2.08650541382307 |
| 11.1649997504428 | 3.01349339855424 |
| 11.1674997503869 | 2.07942634435197 |
| 11.1699997503310 | 3.01989914409174 |
| 11.1724997502752 | 2.09804198590710 |
| 11.1749997502193 | 3.01467544832292 |
| 11.1774997501634 | 2.13586577726434 |
| 11.1799997501075 | 3.01825485409185 |
| 11.1824997500516 | 2.16454834415335 |
| 11.1849997499958 | 3.03306595245042 |
| 11.1874997499399 | 2.17755712519465 |
| 11.1899997498840 | 3.04614828571263 |
| 11.1924997498281 | 2.18201474423570 |

|                  |                  |
|------------------|------------------|
| 11.1949997497723 | 3.04978782458600 |
| 11.1974997497164 | 2.17627019957128 |
| 11.1999997496605 | 3.06559548232542 |
| 11.2024997496046 | 2.16668103563792 |
| 11.2049997495487 | 3.10213057860481 |
| 11.2074997494929 | 2.14552906964599 |
| 11.2099997494370 | 3.13166240245880 |
| 11.2124997493811 | 2.13415588792126 |
| 11.2149997493252 | 3.14323821863536 |
| 11.2174997492693 | 2.12404319942439 |
| 11.2199997492135 | 3.14063912670924 |
| 11.2224997491576 | 2.12375383197606 |
| 11.2249997491017 | 3.15528323400008 |
| 11.2274997490458 | 2.12972362748855 |
| 11.2299997489899 | 3.16181437956279 |
| 11.2324997489341 | 2.15391041388958 |
| 11.2349997488782 | 3.16563170834606 |
| 11.2374997488223 | 2.16486019895096 |
| 11.2399997487664 | 3.15449405452380 |
| 11.2424997487105 | 2.16939536233878 |
| 11.2449997486547 | 3.16669212945575 |
| 11.2474997485988 | 2.17649633711752 |
| 11.2499997485429 | 3.15330601797050 |
| 11.2524997484870 | 2.19870636236242 |
| 11.2549997484311 | 3.12955296399805 |
| 11.2574997483753 | 2.20782767392249 |
| 11.2599997483194 | 3.08316601585351 |
| 11.2624997482635 | 2.19681338550729 |
| 11.2649997482076 | 3.05833885149210 |
| 11.2674997481517 | 2.16515067444485 |
| 11.2699997480959 | 3.03846479665077 |
| 11.2724997480400 | 2.13325812402930 |
| 11.2749997479841 | 3.02498014876891 |
| 11.2774997479282 | 2.10479636773822 |
| 11.2799997478724 | 3.00868410324331 |
| 11.2824997478165 | 2.07494970665267 |
| 11.2849997477606 | 2.99799819618908 |
| 11.2874997477047 | 2.05534194406770 |
| 11.2899997476488 | 2.99829032832062 |
| 11.2924997475930 | 2.06303857717567 |
| 11.2949997475371 | 2.99177932566124 |
| 11.2974997474812 | 2.09917919475923 |
| 11.2999997474253 | 3.00419536971915 |
| 11.3024997473694 | 2.12770440725703 |
| 11.3049997473136 | 3.02911198186317 |
| 11.3074997472577 | 2.14744414075454 |
| 11.3099997472018 | 3.08520689747333 |
| 11.3124997471459 | 2.16481144479606 |
| 11.3149997470900 | 3.11563530211994 |
| 11.3174997470342 | 2.20271117144441 |
| 11.3199997469783 | 3.13981677001780 |
| 11.3224997469224 | 2.23558493224055 |

|                  |                  |
|------------------|------------------|
| 11.3249997468665 | 3.14088109545554 |
| 11.3274997468106 | 2.25292698994530 |
| 11.3299997467548 | 3.16545198671691 |
| 11.3324997466989 | 2.24259975149579 |
| 11.3349997466430 | 3.16894910475729 |
| 11.3374997465871 | 2.22808406465600 |
| 11.3399997465312 | 3.16697535419539 |
| 11.3424997464754 | 2.19780339934354 |
| 11.3449997464195 | 3.15742783293918 |
| 11.3474997463636 | 2.17011516168336 |
| 11.3499997463077 | 3.16011164389393 |
| 11.3524997462519 | 2.14600677713865 |
| 11.3549997461960 | 3.14377758994176 |
| 11.3574997461401 | 2.13341494620479 |
| 11.3599997460842 | 3.10300425148597 |
| 11.3624997460283 | 2.11654712990970 |
| 11.3649997459725 | 3.05552440803571 |
| 11.3674997459166 | 2.10773736935155 |
| 11.3699997458607 | 3.02584044747472 |
| 11.3724997458048 | 2.11244591530198 |
| 11.3749997457489 | 3.01089833235432 |
| 11.3774997456931 | 2.13106080433079 |
| 11.3799997456372 | 2.98820078815363 |
| 11.3824997455813 | 2.14576259308270 |
| 11.3849997455254 | 2.96867335677892 |
| 11.3874997454695 | 2.14095303956392 |
| 11.3899997454137 | 2.96303347159039 |
| 11.3924997453578 | 2.13853161136094 |
| 11.3949997453019 | 2.97111262475541 |
| 11.3974997452460 | 2.15053690348108 |
| 11.3999997451901 | 2.96049508089137 |
| 11.4024997451343 | 2.17590308442081 |
| 11.4049997450784 | 2.95818154018056 |
| 11.4074997450225 | 2.16690863162525 |
| 11.4099997449666 | 2.97617216396381 |
| 11.4124997449107 | 2.13609432671359 |
| 11.4149997448549 | 3.02449855239195 |
| 11.4174997447990 | 2.10843671289916 |
| 11.4199997447431 | 3.05238646088827 |
| 11.4224997446872 | 2.12363487497027 |
| 11.4249997446314 | 3.06838633368258 |
| 11.4274997445755 | 2.14416307890748 |
| 11.4299997445196 | 3.07744356397416 |
| 11.4324997444637 | 2.15457787784313 |
| 11.4349997444078 | 3.11105206656751 |
| 11.4374997443520 | 2.15084217435171 |
| 11.4399997442961 | 3.12362312019568 |
| 11.4424997442402 | 2.16066370425085 |
| 11.4449997441843 | 3.12584896148198 |
| 11.4474997441284 | 2.16608915153878 |
| 11.4499997440726 | 3.12823841573289 |
| 11.4524997440167 | 2.17221486407676 |

|                  |                  |
|------------------|------------------|
| 11.4549997439608 | 3.15287638546058 |
| 11.4574997439049 | 2.17455454195405 |
| 11.4599997438490 | 3.15231387517994 |
| 11.4624997437932 | 2.17707955465321 |
| 11.4649997437373 | 3.12477671399238 |
| 11.4674997436814 | 2.16625809459099 |
| 11.4699997436255 | 3.09276455781878 |
| 11.4724997435696 | 2.15198092944733 |
| 11.4749997435138 | 3.08489885070889 |
| 11.4774997434579 | 2.14339599194386 |
| 11.4799997434020 | 3.07441167993325 |
| 11.4824997433461 | 2.13772218370582 |
| 11.4849997432902 | 3.04468535239046 |
| 11.4874997432344 | 2.12359913801381 |
| 11.4899997431785 | 3.01681360067887 |
| 11.4924997431226 | 2.09575593421181 |
| 11.4949997430667 | 3.01040778923570 |
| 11.4974997430108 | 2.08885780711876 |
| 11.4999997429550 | 3.00850167461928 |
| 11.5024997428991 | 2.10355631371708 |
| 11.5049997428432 | 2.98388013781067 |
| 11.5074997427873 | 2.12693924940065 |
| 11.5099997427315 | 2.96960916163963 |
| 11.5124997426756 | 2.11422938956396 |
| 11.5149997426197 | 2.98471866624377 |
| 11.5174997425638 | 2.10225326450074 |
| 11.5199997425079 | 3.02785334526460 |
| 11.5224997424521 | 2.10640056388997 |
| 11.5249997423962 | 3.04173579914578 |
| 11.5274997423403 | 2.13835714468397 |
| 11.5299997422844 | 3.05324234035001 |
| 11.5324997422285 | 2.14599854489163 |
| 11.5349997421727 | 3.06950885820745 |
| 11.5374997421168 | 2.13501068731470 |
| 11.5399997420609 | 3.11416446556456 |
| 11.5424997420050 | 2.12950216834827 |
| 11.5449997419491 | 3.12679354887991 |
| 11.5474997418933 | 2.15407591475997 |
| 11.5499997418374 | 3.13128921955845 |
| 11.5524997417815 | 2.16971707612444 |
| 11.5549997417256 | 3.13537717905279 |
| 11.5574997416697 | 2.15856969366152 |
| 11.5599997416139 | 3.16433109198421 |
| 11.5624997415580 | 2.14493176402374 |
| 11.5649997415021 | 3.16092805307508 |
| 11.5674997414462 | 2.15422770626413 |
| 11.5699997413903 | 3.12565757786822 |
| 11.5724997413345 | 2.16346424745730 |
| 11.5749997412786 | 3.09355400699277 |
| 11.5774997412227 | 2.14818065266146 |
| 11.5799997411668 | 3.09140636577545 |
| 11.5824997411110 | 2.11965068092835 |



|                  |                  |
|------------------|------------------|
| 11.5849997410551 | 3.09366091821276 |
| 11.5874997409992 | 2.10299383244602 |
| 11.5899997409433 | 3.05820814625607 |
| 11.5924997408874 | 2.10259604230294 |
| 11.5949997408316 | 3.02904861632725 |
| 11.5974997407757 | 2.10043426325915 |
| 11.5999997407198 | 3.01119514475399 |
| 11.6024997406639 | 2.10515917888102 |
| 11.6049997406080 | 3.01678444028108 |
| 11.6074997405522 | 2.11401379343773 |
| 11.6099997404963 | 2.98869206361713 |
| 11.6124997404404 | 2.12728322174646 |
| 11.6149997403845 | 2.97215725140024 |
| 11.6174997403286 | 2.11764893172641 |
| 11.6199997402728 | 2.98542006249891 |
| 11.6224997402169 | 2.11737832395016 |
| 11.6249997401610 | 3.02215407564770 |
| 11.6274997401051 | 2.12675426273818 |
| 11.6299997400492 | 3.02513961056643 |
| 11.6324997399934 | 2.14354140250801 |
| 11.6349997399375 | 3.01191061559038 |
| 11.6374997398816 | 2.12627257490873 |
| 11.6399997398257 | 3.02262598590117 |
| 11.6424997397698 | 2.10663027222173 |
| 11.6449997397140 | 3.06476352597945 |
| 11.6474997396581 | 2.10375239278628 |
| 11.6499997396022 | 3.09533931267301 |
| 11.6524997395463 | 2.12739479127759 |
| 11.6549997394904 | 3.10084845561775 |
| 11.6574997394346 | 2.13195329559092 |
| 11.6599997393787 | 3.12198817888473 |
| 11.6624997393228 | 2.11601072928423 |
| 11.6649997392669 | 3.16054370168346 |
| 11.6674997392111 | 2.12636220748301 |
| 11.6699997391552 | 3.17559376858707 |
| 11.6724997390993 | 2.17517315007082 |
| 11.6749997390434 | 3.14799001329864 |
| 11.6774997389875 | 2.21869312325116 |
| 11.6799997389317 | 3.12862722757474 |
| 11.6824997388758 | 2.20675069556781 |
| 11.6849997388199 | 3.14231222274649 |
| 11.6874997387640 | 2.17458402117416 |
| 11.6899997387081 | 3.15197876160770 |
| 11.6924997386523 | 2.15620121334304 |
| 11.6949997385964 | 3.11886295336634 |
| 11.6974997385405 | 2.16030743595188 |
| 11.6999997384846 | 3.06789285450845 |
| 11.7024997384287 | 2.14101080781579 |
| 11.7049997383729 | 3.03817467011724 |
| 11.7074997383170 | 2.10697836866590 |
| 11.7099997382611 | 3.02497040429059 |
| 11.7124997382052 | 2.07249004959590 |



|                  |                  |
|------------------|------------------|
| 11.7149997381493 | 2.98921471932329 |
| 11.7174997380935 | 2.06151316319203 |
| 11.7199997380376 | 2.96049529575728 |
| 11.7224997379817 | 2.05207616720871 |
| 11.7249997379258 | 2.97831197817707 |
| 11.7274997378699 | 2.06293502668674 |
| 11.7299997378141 | 3.01033709102835 |
| 11.7324997377582 | 2.09935519914139 |
| 11.7349997377023 | 3.01333624280199 |
| 11.7374997376464 | 2.14638144014665 |
| 11.7399997375906 | 2.99973665403515 |
| 11.7424997375347 | 2.17227493739697 |
| 11.7449997374788 | 3.02382550146069 |
| 11.7474997374229 | 2.18571764817576 |
| 11.7499997373670 | 3.06706876326453 |
| 11.7524997373112 | 2.19906743180877 |
| 11.7549997372553 | 3.09651367353432 |
| 11.7574997371994 | 2.20083539103723 |
| 11.7599997371435 | 3.10137327594809 |
| 11.7624997370876 | 2.17731186719220 |
| 11.7649997370318 | 3.11919276153783 |
| 11.7674997369759 | 2.13988927303961 |
| 11.7699997369200 | 3.14261636541306 |
| 11.7724997368641 | 2.12579907163542 |
| 11.7749997368082 | 3.14396629799828 |
| 11.7774997367524 | 2.12882805584528 |
| 11.7799997366965 | 3.12014786354525 |
| 11.7824997366406 | 2.12408056596213 |
| 11.7849997365847 | 3.10698254408164 |
| 11.7874997365288 | 2.09424954103421 |
| 11.7899997364730 | 3.12945204882053 |
| 11.7924997364171 | 2.09248514288704 |
| 11.7949997363612 | 3.13490321946532 |
| 11.7974997363053 | 2.12516416180162 |
| 11.7999997362494 | 3.11700300061662 |
| 11.8024997361936 | 2.17152734577532 |
| 11.8049997361377 | 3.07909606816108 |
| 11.8074997360818 | 2.18571597606048 |
| 11.8099997360259 | 3.07028094653600 |
| 11.8124997359701 | 2.19300262371982 |
| 11.8149997359142 | 3.05467829213487 |
| 11.8174997358583 | 2.19405735895509 |
| 11.8199997358024 | 3.03112615327587 |
| 11.8224997357465 | 2.18750300706948 |
| 11.8249997356907 | 3.00258018052358 |
| 11.8274997356348 | 2.15002492127650 |
| 11.8299997355789 | 3.00239452515971 |
| 11.8324997355230 | 2.10401122982222 |
| 11.8349997354671 | 3.00529460060241 |
| 11.8374997354113 | 2.07865445586201 |
| 11.8399997353554 | 2.98197288295853 |
| 11.8424997352995 | 2.07486789322019 |

|                  |                  |
|------------------|------------------|
| 11.8449997352436 | 2.95873204350546 |
| 11.8474997351877 | 2.07240937512500 |
| 11.8499997351319 | 2.97192690696154 |
| 11.8524997350760 | 2.06433574471741 |
| 11.8549997350201 | 3.02169663897387 |
| 11.8574997349642 | 2.08360814372785 |
| 11.8599997349083 | 3.04718898339076 |
| 11.8624997348525 | 2.12460156862622 |
| 11.8649997347966 | 3.06882136485231 |
| 11.8674997347407 | 2.17568016010396 |
| 11.8699997346848 | 3.09050380457248 |
| 11.8724997346289 | 2.21352913191446 |
| 11.8749997345731 | 3.13502492070892 |
| 11.8774997345172 | 2.24781525412499 |
| 11.8799997344613 | 3.14824506693332 |
| 11.8824997344054 | 2.26030205661323 |
| 11.8849997343495 | 3.14853429054997 |
| 11.8874997342937 | 2.25431829556365 |
| 11.8899997342378 | 3.15853445039483 |
| 11.8924997341819 | 2.22790976229155 |
| 11.8949997341260 | 3.19119319397698 |
| 11.8974997340702 | 2.21306642939000 |
| 11.8999997340143 | 3.19439721264466 |
| 11.9024997339584 | 2.19799581277263 |
| 11.9049997339025 | 3.16326251682800 |
| 11.9074997338466 | 2.16316593060495 |
| 11.9099997337908 | 3.13356314508404 |
| 11.9124997337349 | 2.11182264578089 |
| 11.9149997336790 | 3.12568377223209 |
| 11.9174997336231 | 2.09855839040757 |
| 11.9199997335672 | 3.11192435524146 |
| 11.9224997335114 | 2.11677170705889 |
| 11.9249997334555 | 3.07535339242143 |
| 11.9274997333996 | 2.12623315434738 |
| 11.9299997333437 | 3.05686697371230 |
| 11.9324997332878 | 2.11133357521852 |
| 11.9349997332320 | 3.06022574480005 |
| 11.9374997331761 | 2.12039244548032 |
| 11.9399997331202 | 3.05917215129486 |
| 11.9424997330643 | 2.16596134868769 |
| 11.9449997330084 | 3.01929735282334 |
| 11.9474997329526 | 2.20939951982501 |
| 11.9499997328967 | 2.99639138539961 |
| 11.9524997328408 | 2.21628965796689 |
| 11.9549997327849 | 2.99796068285593 |
| 11.9574997327290 | 2.18947689534304 |
| 11.9599997326732 | 3.02119710252625 |
| 11.9624997326173 | 2.16607652033510 |
| 11.9649997325614 | 3.02208154981182 |
| 11.9674997325055 | 2.14790544114633 |
| 11.9699997324497 | 3.03039141647593 |
| 11.9724997323938 | 2.13848876153442 |

|                  |                  |
|------------------|------------------|
| 11.9749997323379 | 3.03934824019114 |
| 11.9774997322820 | 2.11970838598992 |
| 11.9799997322261 | 3.06059748036850 |
| 11.9824997321703 | 2.10833159638540 |
| 11.9849997321144 | 3.06157565514900 |
| 11.9874997320585 | 2.10092119630247 |
| 11.9899997320026 | 3.06579711176343 |
| 11.9924997319467 | 2.11199806449793 |
| 11.9949997318909 | 3.09885898213423 |
| 11.9974997318350 | 2.12921309033807 |
| 11.9999997317791 | 3.14183439626104 |
| 12.0024997317232 | 2.16333935049936 |
| 12.0049997316673 | 3.16658039848367 |
| 12.0074997316115 | 2.19522994520870 |
| 12.0099997315556 | 3.16280813658907 |
| 12.0124997314997 | 2.21679444824751 |
| 12.0149997314438 | 3.17378709077799 |
| 12.0174997313879 | 2.23040223080367 |
| 12.0199997313321 | 3.17955385945686 |
| 12.0224997312762 | 2.25343547316603 |
| 12.0249997312203 | 3.18063513255718 |
| 12.0274997311644 | 2.26318659005682 |
| 12.0299997311085 | 3.15429543264371 |
| 12.0324997310527 | 2.23800977241968 |
| 12.0349997309968 | 3.14733432111620 |
| 12.0374997309409 | 2.18844672022716 |
| 12.0399997308850 | 3.14053853025066 |
| 12.0424997308291 | 2.15142616743661 |
| 12.0449997307733 | 3.12216332061137 |
| 12.0474997307174 | 2.13683961699516 |
| 12.0499997306615 | 3.06969352301138 |
| 12.0524997306056 | 2.11888243871811 |
| 12.0549997305498 | 3.02689983948528 |
| 12.0574997304939 | 2.08466802155979 |
| 12.0599997304380 | 3.00755510602034 |
| 12.0624997303821 | 2.05670220731490 |
| 12.0649997303262 | 2.99964795032317 |
| 12.0674997302704 | 2.06329538062610 |
| 12.0699997302145 | 2.99509511094289 |
| 12.0724997301586 | 2.08751098260943 |
| 12.0749997301027 | 2.99731328542797 |
| 12.0774997300468 | 2.11631992762531 |
| 12.0799997299910 | 3.01535449885515 |
| 12.0824997299351 | 2.14331341211149 |
| 12.0849997298792 | 3.03113355346643 |
| 12.0874997298233 | 2.18231956122700 |
| 12.0899997297674 | 3.03911938148718 |
| 12.0924997297116 | 2.20781909065168 |
| 12.0949997296557 | 3.04878523091165 |
| 12.0974997295998 | 2.21412590700055 |
| 12.0999997295439 | 3.08610664660459 |
| 12.1024997294880 | 2.19228581815351 |

|                  |                  |
|------------------|------------------|
| 12.1049997294322 | 3.12534310965580 |
| 12.1074997293763 | 2.17840091613780 |
| 12.1099997293204 | 3.14052349972755 |
| 12.1124997292645 | 2.16787028001885 |
| 12.1149997292086 | 3.13600284649185 |
| 12.1174997291528 | 2.15747367023563 |
| 12.1199997290969 | 3.14241456813610 |
| 12.1224997290410 | 2.13843955703359 |
| 12.1249997289851 | 3.15416713419977 |
| 12.1274997289293 | 2.12878711580186 |
| 12.1299997288734 | 3.14623959425216 |
| 12.1324997288175 | 2.11926610896721 |
| 12.1349997287616 | 3.13080316749457 |
| 12.1374997287057 | 2.11454807816020 |
| 12.1399997286499 | 3.13519837718461 |
| 12.1424997285940 | 2.12315634563119 |
| 12.1449997285381 | 3.14509586004847 |
| 12.1474997284822 | 2.15116404929076 |
| 12.1499997284263 | 3.13072856222014 |
| 12.1524997283705 | 2.17809712278080 |
| 12.1549997283146 | 3.09097297532816 |
| 12.1574997282587 | 2.18374448768646 |
| 12.1599997282028 | 3.07165944364964 |
| 12.1624997281469 | 2.18164106743089 |
| 12.1649997280911 | 3.06594526051624 |
| 12.1674997280352 | 2.18121184956459 |
| 12.1699997279793 | 3.05344962695899 |
| 12.1724997279234 | 2.18227644496796 |
| 12.1749997278675 | 3.01964189565137 |
| 12.1774997278117 | 2.15126423877356 |
| 12.1799997277558 | 3.00974487006872 |
| 12.1824997276999 | 2.10669159347494 |
| 12.1849997276440 | 3.00961321869273 |
| 12.1874997275881 | 2.08036950430302 |
| 12.1899997275323 | 3.00231777875711 |
| 12.1924997274764 | 2.09413033929863 |
| 12.1949997274205 | 2.97874436559803 |
| 12.1974997273646 | 2.09771996083939 |
| 12.1999997273088 | 2.98773615234445 |
| 12.2024997272529 | 2.08106620307116 |
| 12.2049997271970 | 3.03003270160406 |
| 12.2074997271411 | 2.07468296649705 |
| 12.2099997270852 | 3.06995762203357 |
| 12.2124997270294 | 2.11851768660283 |
| 12.2149997269735 | 3.07908195375927 |
| 12.2174997269176 | 2.17322012009483 |
| 12.2199997268617 | 3.09306920188880 |
| 12.2224997268058 | 2.20570666563485 |
| 12.2249997267500 | 3.13022825408899 |
| 12.2274997266941 | 2.21247906960450 |
| 12.2299997266382 | 3.15611021860216 |
| 12.2324997265823 | 2.22054521867423 |

|                  |                  |
|------------------|------------------|
| 12.2349997265264 | 3.15408183846488 |
| 12.2374997264706 | 2.21995042356581 |
| 12.2399997264147 | 3.15050929361080 |
| 12.2424997263588 | 2.20772059712410 |
| 12.2449997263029 | 3.16766051399041 |
| 12.2474997262470 | 2.18585705688272 |
| 12.2499997261912 | 3.16350207841263 |
| 12.2524997261353 | 2.16179075200353 |
| 12.2549997260794 | 3.13433410517003 |
| 12.2574997260235 | 2.12928801603024 |
| 12.2599997259676 | 3.08541962716484 |
| 12.2624997259118 | 2.09430294351390 |
| 12.2649997258559 | 3.07443013656726 |
| 12.2674997258000 | 2.07889865673750 |
| 12.2699997257441 | 3.05940491413232 |
| 12.2724997256882 | 2.08426532542812 |
| 12.2749997256324 | 3.04669976980240 |
| 12.2774997255765 | 2.09732613909473 |
| 12.2799997255206 | 3.01207434315573 |
| 12.2824997254647 | 2.09739734143939 |
| 12.2849997254089 | 3.01866467156920 |
| 12.2874997253530 | 2.11214601311297 |
| 12.2899997252971 | 3.01694168859227 |
| 12.2924997252412 | 2.14559367057115 |
| 12.2949997251853 | 3.01467148166446 |
| 12.2974997251295 | 2.18800975400065 |
| 12.2999997250736 | 2.99510211774941 |
| 12.3024997250177 | 2.19039039726004 |
| 12.3049997249618 | 3.00562048795220 |
| 12.3074997249059 | 2.16456240228943 |
| 12.3099997248501 | 3.03657607712058 |
| 12.3124997247942 | 2.13581623952507 |
| 12.3149997247383 | 3.05434145759589 |
| 12.3174997246824 | 2.13205081293247 |
| 12.3199997246265 | 3.05881227997551 |
| 12.3224997245707 | 2.12401843123547 |
| 12.3249997245148 | 3.05585670689547 |
| 12.3274997244589 | 2.09918446101051 |
| 12.3299997244030 | 3.09008644011264 |
| 12.3324997243471 | 2.07949122988749 |
| 12.3349997242913 | 3.09775430284876 |
| 12.3374997242354 | 2.09289329817313 |
| 12.3399997241795 | 3.10901799735093 |
| 12.3424997241236 | 2.11797340389109 |
| 12.3449997240677 | 3.11272849931214 |
| 12.3474997240119 | 2.13350200373330 |
| 12.3499997239560 | 3.16061136929803 |
| 12.3524997239001 | 2.15046949447115 |
| 12.3549997238442 | 3.16829372934155 |
| 12.3574997237884 | 2.18094792288239 |
| 12.3599997237325 | 3.15840142174012 |
| 12.3624997236766 | 2.20720935232909 |

|                  |                  |
|------------------|------------------|
| 12.3649997236207 | 3.12780748842924 |
| 12.3674997235648 | 2.21353487371512 |
| 12.3699997235090 | 3.13199742507828 |
| 12.3724997234531 | 2.20351376422567 |
| 12.3749997233972 | 3.12311200005796 |
| 12.3774997233413 | 2.18494898263072 |
| 12.3799997232854 | 3.08924384827177 |
| 12.3824997232296 | 2.15166116177571 |
| 12.3849997231737 | 3.04800445407909 |
| 12.3874997231178 | 2.10189965211401 |
| 12.3899997230619 | 3.03318261819776 |
| 12.3924997230060 | 2.06539672864343 |
| 12.3949997229502 | 3.02646256938195 |
| 12.3974997228943 | 2.05723374997422 |
| 12.3999997228384 | 2.98930966720763 |
| 12.4024997227825 | 2.06148686791088 |
| 12.4049997227266 | 2.96020989313883 |
| 12.4074997226708 | 2.05165545520636 |
| 12.4099997226149 | 2.97021288483132 |
| 12.4124997225590 | 2.06283109170334 |
| 12.4149997225031 | 3.01528497226216 |
| 12.4174997224472 | 2.10655051337156 |
| 12.4199997223914 | 3.02809200049305 |
| 12.4224997223355 | 2.16453866831618 |
| 12.4249997222796 | 3.04013500074207 |
| 12.4274997222237 | 2.18661446913396 |
| 12.4299997221678 | 3.05934288820099 |
| 12.4324997221120 | 2.18770311080046 |
| 12.4349997220561 | 3.11055375558597 |
| 12.4374997220002 | 2.19347066041217 |
| 12.4399997219443 | 3.11815569622141 |
| 12.4424997218885 | 2.20870232416526 |
| 12.4449997218326 | 3.11695688774179 |
| 12.4474997217767 | 2.18853162048895 |
| 12.4499997217208 | 3.12067879010016 |
| 12.4524997216649 | 2.12961485032693 |
| 12.4549997216091 | 3.16044967638926 |
| 12.4574997215532 | 2.08605866546677 |
| 12.4599997214973 | 3.15658284914399 |
| 12.4624997214414 | 2.09174284104189 |
| 12.4649997213855 | 3.12305055911332 |
| 12.4674997213297 | 2.10848636166659 |
| 12.4699997212738 | 3.09586712829411 |
| 12.4724997212179 | 2.10008191377717 |
| 12.4749997211620 | 3.11191303977425 |
| 12.4774997211061 | 2.09215896368847 |
| 12.4799997210503 | 3.11532706886789 |
| 12.4824997209944 | 2.11628032628454 |
| 12.4849997209385 | 3.08706391975628 |
| 12.4874997208826 | 2.15308817519604 |
| 12.4899997208267 | 3.06318999814376 |
| 12.4924997207709 | 2.17423804286030 |



|                  |                  |
|------------------|------------------|
| 12.4949997207150 | 3.05957323561539 |
| 12.4974997206591 | 2.18175277943790 |
| 12.4999997206032 | 3.05660295993444 |
| 12.5024997205473 | 2.18258076607442 |
| 12.5049997204915 | 3.01154153725198 |
| 12.5074997204356 | 2.16453961278282 |
| 12.5099997203797 | 2.98219513800019 |
| 12.5124997203238 | 2.12184074419948 |
| 12.5149997202680 | 2.98553795197616 |
| 12.5174997202121 | 2.08239329852192 |
| 12.5199997201562 | 3.01118042291740 |
| 12.5224997201003 | 2.06339408324707 |
| 12.5249997200444 | 2.99958961945613 |
| 12.5274997199886 | 2.05750249146581 |
| 12.5299997199327 | 2.99066306437452 |
| 12.5324997198768 | 2.04529245238059 |
| 12.5349997198209 | 3.01140113004910 |
| 12.5374997197650 | 2.06003404366166 |
| 12.5399997197092 | 3.05668964738293 |
| 12.5424997196533 | 2.11074229509644 |
| 12.5449997195974 | 3.08106139439869 |
| 12.5474997195415 | 2.17198933543699 |
| 12.5499997194856 | 3.09922631563718 |
| 12.5524997194298 | 2.19271959156044 |
| 12.5549997193739 | 3.13786453893934 |
| 12.5574997193180 | 2.19333448267495 |
| 12.5599997192621 | 3.19073713624736 |
| 12.5624997192062 | 2.20975069640672 |
| 12.5649997191504 | 3.19354550198882 |
| 12.5674997190945 | 2.24080332406863 |
| 12.5699997190386 | 3.16697699923271 |
| 12.5724997189827 | 2.23619108271029 |
| 12.5749997189268 | 3.14694884642649 |
| 12.5774997188710 | 2.18320567867574 |
| 12.5799997188151 | 3.15726911885081 |
| 12.5824997187592 | 2.12410420779231 |
| 12.5849997187033 | 3.14046408906104 |
| 12.5874997186475 | 2.09381240250076 |
| 12.5899997185916 | 3.10237337678317 |
| 12.5924997185357 | 2.07957020072947 |
| 12.5949997184798 | 3.06336665550796 |
| 12.5974997184239 | 2.05742731500508 |
| 12.5999997183681 | 3.05504060297633 |
| 12.6024997183122 | 2.05237802471036 |
| 12.6049997182563 | 3.03873244684852 |
| 12.6074997182004 | 2.08108585979339 |
| 12.6099997181445 | 2.99728599758832 |
| 12.6124997180887 | 2.11893428578142 |
| 12.6149997180328 | 2.97933213734706 |
| 12.6174997179769 | 2.13935432759069 |
| 12.6199997179210 | 3.00100719481843 |
| 12.6224997178651 | 2.15362357793882 |



|                  |                  |
|------------------|------------------|
| 12.6249997178093 | 3.03637325075640 |
| 12.6274997177534 | 2.17345673427584 |
| 12.6299997176975 | 3.01791105893829 |
| 12.6324997176416 | 2.18064835717660 |
| 12.6349997175857 | 3.01023723752215 |
| 12.6374997175299 | 2.15871127691037 |
| 12.6399997174740 | 3.02169757129416 |
| 12.6424997174181 | 2.12915085413317 |
| 12.6449997173622 | 3.06263421790213 |
| 12.6474997173063 | 2.11242404690204 |
| 12.6499997172505 | 3.06057585768038 |
| 12.6524997171946 | 2.09829605585723 |
| 12.6549997171387 | 3.05875073565680 |
| 12.6574997170828 | 2.06418618690127 |
| 12.6599997170269 | 3.08973811777147 |
| 12.6624997169711 | 2.05231386870600 |
| 12.6649997169152 | 3.13990478013729 |
| 12.6674997168593 | 2.09649025817412 |
| 12.6699997168034 | 3.14505411590850 |
| 12.6724997167476 | 2.16566554433620 |
| 12.6749997166917 | 3.12182314212289 |
| 12.6774997166358 | 2.19273632784678 |
| 12.6799997165799 | 3.13327748538172 |
| 12.6824997165240 | 2.19218056131583 |
| 12.6849997164682 | 3.16894292193170 |
| 12.6874997164123 | 2.20301599958648 |
| 12.6899997163564 | 3.17580270494154 |
| 12.6924997163005 | 2.22680052314818 |
| 12.6949997162446 | 3.13366569848811 |
| 12.6974997161888 | 2.21885433532105 |
| 12.6999997161329 | 3.10850625831299 |
| 12.7024997160770 | 2.16686714649999 |
| 12.7049997160211 | 3.09582057178222 |
| 12.7074997159652 | 2.11769171664126 |
| 12.7099997159094 | 3.07447782609812 |
| 12.7124997158535 | 2.09610894945110 |
| 12.7149997157976 | 3.00855118332878 |
| 12.7174997157417 | 2.07777737545147 |
| 12.7199997156858 | 2.97391143470447 |
| 12.7224997156300 | 2.03310670990531 |
| 12.7249997155741 | 2.98351507018550 |
| 12.7274997155182 | 2.00965520633615 |
| 12.7299997154623 | 3.00643285783668 |
| 12.7324997154064 | 2.04808980966509 |
| 12.7349997153506 | 2.97979232636672 |
| 12.7374997152947 | 2.11619695407540 |
| 12.7399997152388 | 2.97049373767224 |
| 12.7424997151829 | 2.16150991204598 |
| 12.7449997151271 | 2.99950464056017 |
| 12.7474997150712 | 2.18403422440767 |
| 12.7499997150153 | 3.04711430325185 |
| 12.7524997149594 | 2.20130760440857 |

|                  |                  |
|------------------|------------------|
| 12.7549997149035 | 3.05532900492058 |
| 12.7574997148477 | 2.20847005230340 |
| 12.7599997147918 | 3.06512951686319 |
| 12.7624997147359 | 2.18891123628780 |
| 12.7649997146800 | 3.10245945351974 |
| 12.7674997146241 | 2.15714507799035 |
| 12.7699997145683 | 3.13350376222672 |
| 12.7724997145124 | 2.13318799059155 |
| 12.7749997144565 | 3.12905135123443 |
| 12.7774997144006 | 2.11353941677012 |
| 12.7799997143447 | 3.09184493624405 |
| 12.7824997142889 | 2.07996418211011 |
| 12.7849997142330 | 3.10534603660494 |
| 12.7874997141771 | 2.06274862176781 |
| 12.7899997141212 | 3.12214835282646 |
| 12.7924997140653 | 2.08216633147451 |
| 12.7949997140095 | 3.13005520457212 |
| 12.7974997139536 | 2.11806180448824 |
| 12.7999997138977 | 3.10072915671992 |
| 12.8024997138418 | 2.13285187515683 |
| 12.8049997137859 | 3.10673138059939 |
| 12.8074997137301 | 2.14658755315268 |
| 12.8099997136742 | 3.10956537486865 |
| 12.8124997136183 | 2.18270282382440 |
| 12.8149997135624 | 3.09812742972106 |
| 12.8174997135065 | 2.22077515464060 |
| 12.8199997134507 | 3.05412541654546 |
| 12.8224997133948 | 2.21691596823538 |
| 12.8249997133389 | 3.03409257809333 |
| 12.8274997132830 | 2.16404216622990 |
| 12.8299997132272 | 3.04290918553956 |
| 12.8324997131713 | 2.11348852872591 |
| 12.8349997131154 | 3.03914513748274 |
| 12.8374997130595 | 2.09337325557078 |
| 12.8399997130036 | 3.00562817169273 |
| 12.8424997129478 | 2.08771616252713 |
| 12.8449997128919 | 2.97173537838028 |
| 12.8474997128360 | 2.05746976402449 |
| 12.8499997127801 | 2.98950800288007 |
| 12.8524997127242 | 2.03315220261863 |
| 12.8549997126684 | 3.00533182043681 |
| 12.8574997126125 | 2.04876331331123 |
| 12.8599997125566 | 3.01387154528457 |
| 12.8624997125007 | 2.09818376410695 |
| 12.8649997124448 | 3.02271757212711 |
| 12.8674997123890 | 2.13824152518395 |
| 12.8699997123331 | 3.07890994037192 |
| 12.8724997122772 | 2.16887522711243 |
| 12.8749997122213 | 3.12591231654072 |
| 12.8774997121654 | 2.20118634490676 |
| 12.8799997121096 | 3.13428753990345 |
| 12.8824997120537 | 2.22574865797870 |

|                  |                  |
|------------------|------------------|
| 12.8849997119978 | 3.12793428010085 |
| 12.8874997119419 | 2.22436877195239 |
| 12.8899997118860 | 3.15449269643805 |
| 12.8924997118302 | 2.20795708707778 |
| 12.8949997117743 | 3.18466033767433 |
| 12.8974997117184 | 2.19187894219298 |
| 12.8999997116625 | 3.16961348988327 |
| 12.9024997116067 | 2.16236807883487 |
| 12.9049997115508 | 3.13255554183960 |
| 12.9074997114949 | 2.10865754092432 |
| 12.9099997114390 | 3.12646959749203 |
| 12.9124997113831 | 2.06953082577549 |
| 12.9149997113273 | 3.13097975926051 |
| 12.9174997112714 | 2.07957894343711 |
| 12.9199997112155 | 3.09604627507697 |
| 12.9224997111596 | 2.10541741017167 |
| 12.9249997111037 | 3.04094806716738 |
| 12.9274997110479 | 2.09841452124527 |
| 12.9299997109920 | 3.03177586429620 |
| 12.9324997109361 | 2.08512162354573 |
| 12.9349997108802 | 3.05711521030350 |
| 12.9374997108243 | 2.11456682035967 |
| 12.9399997107685 | 3.04861184306661 |
| 12.9424997107126 | 2.16822987156943 |
| 12.9449997106567 | 3.00704678870832 |
| 12.9474997106008 | 2.19126882777376 |
| 12.9499997105449 | 2.99550881862514 |
| 12.9524997104891 | 2.16980504098410 |
| 12.9549997104332 | 3.01994481913908 |
| 12.9574997103773 | 2.14953050170729 |
| 12.9599997103214 | 3.02734454090016 |
| 12.9624997102655 | 2.13978686245009 |
| 12.9649997102097 | 3.00629160254058 |
| 12.9674997101538 | 2.12230917225319 |
| 12.9699997100979 | 3.01010135056778 |
| 12.9724997100420 | 2.07383080359151 |
| 12.9749997099862 | 3.05274752819243 |
| 12.9774997099303 | 2.04964918720595 |
| 12.9799997098744 | 3.08023027375065 |
| 12.9824997098185 | 2.07256337517891 |
| 12.9849997097626 | 3.06492654716324 |
| 12.9874997097068 | 2.11215821069966 |
| 12.9899997096509 | 3.06966318247996 |
| 12.9924997095950 | 2.12235914396080 |
| 12.9949997095391 | 3.12078258421490 |
| 12.9974997094832 | 2.13537853130797 |
| 12.9999997094274 | 3.17251111063161 |
| 13.0024997093715 | 2.17810573120361 |
| 13.0049997093156 | 3.16344083528458 |
| 13.0074997092597 | 2.22173414281795 |
| 13.0099997092038 | 3.15051795802992 |
| 13.0124997091480 | 2.23000919512476 |

|                  |                  |
|------------------|------------------|
| 13.0149997090921 | 3.15963611690081 |
| 13.0174997090362 | 2.21435416713068 |
| 13.0199997089803 | 3.17549856377373 |
| 13.0224997089244 | 2.20500757126160 |
| 13.0249997088686 | 3.14039725088228 |
| 13.0274997088127 | 2.18914552070049 |
| 13.0299997087568 | 3.08253827061222 |
| 13.0324997087009 | 2.14479783076424 |
| 13.0349997086450 | 3.06598727681313 |
| 13.0374997085892 | 2.08285409288793 |
| 13.0399997085333 | 3.06732236464787 |
| 13.0424997084774 | 2.05028486222183 |
| 13.0449997084215 | 3.04605474299018 |
| 13.0474997083656 | 2.05017624945979 |
| 13.0499997083098 | 2.98235103757522 |
| 13.0524997082539 | 2.05393850202848 |
| 13.0549997081980 | 2.97080328349775 |
| 13.0574997081421 | 2.05946881949327 |
| 13.0599997080863 | 2.98767271524727 |
| 13.0624997080304 | 2.09759075902236 |
| 13.0649997079745 | 3.01269502886801 |
| 13.0674997079186 | 2.14647512406410 |
| 13.0699997078627 | 2.99862396209495 |
| 13.0724997078069 | 2.17344040517816 |
| 13.0749997077510 | 3.02240858568725 |
| 13.0774997076951 | 2.16999192444672 |
| 13.0799997076392 | 3.05767831585093 |
| 13.0824997075833 | 2.17888518144601 |
| 13.0849997075275 | 3.08723599289672 |
| 13.0874997074716 | 2.19421715180813 |
| 13.0899997074157 | 3.07441873702298 |
| 13.0924997073598 | 2.18659921133549 |
| 13.0949997073039 | 3.07462458510141 |
| 13.0974997072481 | 2.12815387920634 |
| 13.0999997071922 | 3.11022747631327 |
| 13.1024997071363 | 2.07762457834831 |
| 13.1049997070804 | 3.13734729912660 |
| 13.1074997070245 | 2.07589257941229 |
| 13.1099997069687 | 3.12841753805354 |
| 13.1124997069128 | 2.10483722384369 |
| 13.1149997068569 | 3.10477528217132 |
| 13.1174997068010 | 2.10972984305313 |
| 13.1199997067451 | 3.12768898296314 |
| 13.1224997066893 | 2.10683908508956 |
| 13.1249997066334 | 3.14345517512450 |
| 13.1274997065775 | 2.13125945677808 |
| 13.1299997065216 | 3.13384205426981 |
| 13.1324997064658 | 2.17315577988556 |
| 13.1349997064099 | 3.10336632608543 |
| 13.1374997063540 | 2.19988996642355 |
| 13.1399997062981 | 3.11127471954133 |
| 13.1424997062422 | 2.19983019258965 |

|                  |                  |
|------------------|------------------|
| 13.1449997061864 | 3.10829694723155 |
| 13.1474997061305 | 2.19113667657999 |
| 13.1499997060746 | 3.07959637880372 |
| 13.1524997060187 | 2.16964939228692 |
| 13.1549997059628 | 3.02487101729065 |
| 13.1574997059070 | 2.13662146682116 |
| 13.1599997058511 | 3.01448858800427 |
| 13.1624997057952 | 2.09506717196013 |
| 13.1649997057393 | 3.01217295336191 |
| 13.1674997056834 | 2.07208467310798 |
| 13.1699997056276 | 2.99783985635491 |
| 13.1724997055717 | 2.05011386175037 |
| 13.1749997055158 | 2.96794239366299 |
| 13.1774997054599 | 2.02981547660027 |
| 13.1799997054040 | 2.98597142639728 |
| 13.1824997053482 | 2.03784351768849 |
| 13.1849997052923 | 3.01735688537800 |
| 13.1874997052364 | 2.10225101064050 |
| 13.1899997051805 | 3.03166675147137 |
| 13.1924997051246 | 2.16707769988918 |
| 13.1949997050688 | 3.03785044393795 |
| 13.1974997050129 | 2.19028088911468 |
| 13.1999997049570 | 3.07811304541029 |
| 13.2024997049011 | 2.18299591056099 |
| 13.2049997048452 | 3.13716781817884 |
| 13.2074997047894 | 2.19741875985985 |
| 13.2099997047335 | 3.15550179073836 |
| 13.2124997046776 | 2.22220677323106 |
| 13.2149997046217 | 3.14613738765236 |
| 13.2174997045659 | 2.21784367866831 |
| 13.2199997045100 | 3.13961312056549 |
| 13.2224997044541 | 2.16659932846408 |
| 13.2249997043982 | 3.16096223922621 |
| 13.2274997043423 | 2.11857238287013 |
| 13.2299997042865 | 3.15006512161225 |
| 13.2324997042306 | 2.09695644492822 |
| 13.2349997041747 | 3.12301693829044 |
| 13.2374997041188 | 2.08889247399094 |
| 13.2399997040629 | 3.09929633566169 |
| 13.2424997040071 | 2.07098620269306 |
| 13.2449997039512 | 3.10858420851052 |
| 13.2474997038953 | 2.06923824875871 |
| 13.2499997038394 | 3.09930326757192 |
| 13.2524997037835 | 2.10161957336479 |
| 13.2549997037277 | 3.06237957119656 |
| 13.2574997036718 | 2.14226388776220 |
| 13.2599997036159 | 3.03328235018700 |
| 13.2624997035600 | 2.16953422771940 |
| 13.2649997035041 | 3.03582368617234 |
| 13.2674997034483 | 2.17712072294878 |
| 13.2699997033924 | 3.04667767329742 |
| 13.2724997033365 | 2.18693822690834 |

|                  |                  |
|------------------|------------------|
| 13.2749997032806 | 3.02509761533145 |
| 13.2774997032247 | 2.17573899404432 |
| 13.2799997031689 | 3.00598693466056 |
| 13.2824997031130 | 2.14587736935828 |
| 13.2849997030571 | 3.00525304302416 |
| 13.2874997030012 | 2.10580043828707 |
| 13.2899997029454 | 3.01855144904920 |
| 13.2924997028895 | 2.08985949312819 |
| 13.2949997028336 | 3.00517786938444 |
| 13.2974997027777 | 2.07243891803377 |
| 13.2999997027218 | 2.99146677200015 |
| 13.3024997026660 | 2.05222897568278 |
| 13.3049997026101 | 3.01840133403761 |
| 13.3074997025542 | 2.04504144628269 |
| 13.3099997024983 | 3.06898574298888 |
| 13.3124997024424 | 2.08594635585889 |
| 13.3149997023866 | 3.09844640930870 |
| 13.3174997023307 | 2.14410481926677 |
| 13.3199997022748 | 3.10018371154291 |
| 13.3224997022189 | 2.18047821413400 |
| 13.3249997021630 | 3.12904826207746 |
| 13.3274997021072 | 2.19674702034986 |
| 13.3299997020513 | 3.16322386906191 |
| 13.3324997019954 | 2.22289176590067 |
| 13.3349997019395 | 3.18096627451848 |
| 13.3374997018836 | 2.24556331051721 |
| 13.3399997018278 | 3.16130230023720 |
| 13.3424997017719 | 2.22889064007434 |
| 13.3449997017160 | 3.16352575439398 |
| 13.3474997016601 | 2.17453438503510 |
| 13.3499997016042 | 3.16671748796715 |
| 13.3524997015484 | 2.13253651460157 |
| 13.3549997014925 | 3.14899674870728 |
| 13.3574997014366 | 2.12071682592231 |
| 13.3599997013807 | 3.08988646052019 |
| 13.3624997013249 | 2.10435982639519 |
| 13.3649997012690 | 3.05170040106184 |
| 13.3674997012131 | 2.06343784518483 |
| 13.3699997011572 | 3.04404048661528 |
| 13.3724997011013 | 2.03632409852361 |
| 13.3749997010455 | 3.03443570023258 |
| 13.3774997009896 | 2.06165313435529 |
| 13.3799997009337 | 3.00406651231710 |
| 13.3824997008778 | 2.10403525095494 |
| 13.3849997008219 | 2.98881531229767 |
| 13.3874997007661 | 2.13722347107503 |
| 13.3899997007102 | 3.00573867091968 |
| 13.3924997006543 | 2.15635152132879 |
| 13.3949997005984 | 3.01263788122336 |
| 13.3974997005425 | 2.18017266002191 |
| 13.3999997004867 | 3.00529408703724 |
| 13.4024997004308 | 2.18347666048094 |



|                  |                  |
|------------------|------------------|
| 13.4049997003749 | 3.00484837055333 |
| 13.4074997003190 | 2.17393198603705 |
| 13.4099997002631 | 3.04272732023673 |
| 13.4124997002073 | 2.14847514165070 |
| 13.4149997001514 | 3.06540141082404 |
| 13.4174997000955 | 2.12435930077565 |
| 13.4199997000396 | 3.07132171626012 |
| 13.4224996999837 | 2.09053751517642 |
| 13.4249996999279 | 3.06242024006030 |
| 13.4274996998720 | 2.06712894301057 |
| 13.4299996998161 | 3.09379402824509 |
| 13.4324996997602 | 2.07279358407657 |
| 13.4349996997043 | 3.11204754619174 |
| 13.4374996996485 | 2.10876062169678 |
| 13.4399996995926 | 3.12365058408395 |
| 13.4424996995367 | 2.13296293359871 |
| 13.4449996994808 | 3.12169642739745 |
| 13.4474996994250 | 2.13427353850719 |
| 13.4499996993691 | 3.15889822331299 |
| 13.4524996993132 | 2.14902732961170 |
| 13.4549996992573 | 3.17574380270733 |
| 13.4574996992014 | 2.19514703572084 |
| 13.4599996991456 | 3.16346290917232 |
| 13.4624996990897 | 2.23783881123463 |
| 13.4649996990338 | 3.12837693556659 |
| 13.4674996989779 | 2.22972688331307 |
| 13.4699996989220 | 3.11665383252584 |
| 13.4724996988662 | 2.18532825889705 |
| 13.4749996988103 | 3.11584414382636 |
| 13.4774996987544 | 2.14638222023012 |
| 13.4799996986985 | 3.08637614127945 |
| 13.4824996986426 | 2.12967078004536 |
| 13.4849996985868 | 3.04627325105333 |
| 13.4874996985309 | 2.10248506301924 |
| 13.4899996984750 | 3.01200552303843 |
| 13.4924996984191 | 2.06117375774509 |
| 13.4949996983632 | 3.01033848045083 |
| 13.4974996983074 | 2.03613799879625 |
| 13.4999996982515 | 2.98163320686868 |
| 13.5024996981956 | 2.05045325258831 |
| 13.5049996981397 | 2.96550716008223 |
| 13.5074996980838 | 2.07480886266037 |
| 13.5099996980280 | 2.96901139361994 |
| 13.5124996979721 | 2.10122910271584 |
| 13.5149996979162 | 3.02056910688930 |
| 13.5174996978603 | 2.12970858809228 |
| 13.5199996978045 | 3.04427438588656 |
| 13.5224996977486 | 2.16740872768244 |
| 13.5249996976927 | 3.05588615661284 |
| 13.5274996976368 | 2.18666818291825 |
| 13.5299996975809 | 3.06930582514255 |
| 13.5324996975251 | 2.18975950144439 |



|                  |                  |
|------------------|------------------|
| 13.5349996974692 | 3.11231943712097 |
| 13.5374996974133 | 2.18371901383237 |
| 13.5399996973574 | 3.13898487977833 |
| 13.5424996973015 | 2.18281792306413 |
| 13.5449996972457 | 3.13182716900566 |
| 13.5474996971898 | 2.15791725023968 |
| 13.5499996971339 | 3.12943756646606 |
| 13.5524996970780 | 2.11429743307866 |
| 13.5549996970221 | 3.15101825809848 |
| 13.5574996969663 | 2.08948862153494 |
| 13.5599996969104 | 3.16492528059763 |
| 13.5624996968545 | 2.10771791286476 |
| 13.5649996967986 | 3.13056840342788 |
| 13.5674996967427 | 2.12476110010020 |
| 13.5699996966869 | 3.09545811803827 |
| 13.5724996966310 | 2.10964554300527 |
| 13.5749996965751 | 3.09962021151882 |
| 13.5774996965192 | 2.10069965685935 |
| 13.5799996964633 | 3.11771543048576 |
| 13.5824996964075 | 2.12809023767532 |
| 13.5849996963516 | 3.09552048654132 |
| 13.5874996962957 | 2.16822867664967 |
| 13.5899996962398 | 3.05489482879886 |
| 13.5924996961839 | 2.16950389965563 |
| 13.5949996961281 | 3.04532064269594 |
| 13.5974996960722 | 2.15071296875455 |
| 13.5999996960163 | 3.05179386990046 |
| 13.6024996959604 | 2.14164489145096 |
| 13.6049996959046 | 3.02940944923000 |
| 13.6074996958487 | 2.14423915970351 |
| 13.6099996957928 | 2.99010361694942 |
| 13.6124996957369 | 2.11676894993218 |
| 13.6149996956810 | 2.99040149587877 |
| 13.6174996956252 | 2.07090725488202 |
| 13.6199996955693 | 3.01969582726555 |
| 13.6224996955134 | 2.05161685451110 |
| 13.6249996954575 | 3.02376047969709 |
| 13.6274996954016 | 2.07690316190958 |
| 13.6299996953458 | 3.00142777541190 |
| 13.6324996952899 | 2.09926875969276 |
| 13.6349996952340 | 3.01643678622642 |
| 13.6374996951781 | 2.10151856797365 |
| 13.6399996951222 | 3.07020508161426 |
| 13.6424996950664 | 2.11049542400333 |
| 13.6449996950105 | 3.10615281292421 |
| 13.6474996949546 | 2.15047467066901 |
| 13.6499996948987 | 3.10729398400875 |
| 13.6524996948428 | 2.18445198306692 |
| 13.6549996947870 | 3.12529005083976 |
| 13.6574996947311 | 2.19373434004690 |
| 13.6599996946752 | 3.16319452805087 |
| 13.6624996946193 | 2.18964735894459 |

|                  |                  |
|------------------|------------------|
| 13.6649996945634 | 3.17942757528631 |
| 13.6674996945076 | 2.19176154323959 |
| 13.6699996944517 | 3.15386727194884 |
| 13.6724996943958 | 2.18005148297420 |
| 13.6749996943399 | 3.13205791149749 |
| 13.6774996942841 | 2.15356402633356 |
| 13.6799996942282 | 3.13928693518799 |
| 13.6824996941723 | 2.12734391867982 |
| 13.6849996941164 | 3.13186522136202 |
| 13.6874996940605 | 2.11118692107307 |
| 13.6899996940047 | 3.09860499722069 |
| 13.6924996939488 | 2.09111547882057 |
| 13.6949996938929 | 3.05119814188378 |
| 13.6974996938370 | 2.06864232169870 |
| 13.6999996937811 | 3.04672484824048 |
| 13.7024996937253 | 2.07567799683742 |
| 13.7049996936694 | 3.03146475405851 |
| 13.7074996936135 | 2.10801400474024 |
| 13.7099996935576 | 3.01566063245949 |
| 13.7124996935017 | 2.13223573220177 |
| 13.7149996934459 | 2.98908713811240 |
| 13.7174996933900 | 2.12194225022384 |
| 13.7199996933341 | 3.01352934495501 |
| 13.7224996932782 | 2.11717806885557 |
| 13.7249996932223 | 3.02888597312494 |
| 13.7274996931665 | 2.13858419614192 |
| 13.7299996931106 | 3.02558392866914 |
| 13.7324996930547 | 2.16986243358928 |
| 13.7349996929988 | 3.00807870539137 |
| 13.7374996929429 | 2.15938580825637 |
| 13.7399996928871 | 3.02479579000798 |
| 13.7424996928312 | 2.11912687212021 |
| 13.7449996927753 | 3.06278966744911 |
| 13.7474996927194 | 2.09313657662323 |
| 13.7499996926636 | 3.07211732059406 |
| 13.7524996926077 | 2.10341058695848 |
| 13.7549996925518 | 3.07278589252424 |
| 13.7574996924959 | 2.11229754720825 |
| 13.7599996924400 | 3.08245091498518 |
| 13.7624996923842 | 2.10234843142354 |
| 13.7649996923283 | 3.13124501785679 |
| 13.7674996922724 | 2.10346604371475 |
| 13.7699996922165 | 3.13347145029215 |
| 13.7724996921606 | 2.13114331556468 |
| 13.7749996921048 | 3.12580884184846 |
| 13.7774996920489 | 2.15791390074905 |
| 13.7799996919930 | 3.12089871422336 |
| 13.7824996919371 | 2.16794538943812 |
| 13.7849996918812 | 3.16306567656854 |
| 13.7874996918254 | 2.17504377284826 |
| 13.7899996917695 | 3.16294132718045 |
| 13.7924996917136 | 2.18400830698168 |

|                  |                  |
|------------------|------------------|
| 13.7949996916577 | 3.13160643851953 |
| 13.7974996916018 | 2.17615091792688 |
| 13.7999996915460 | 3.09455631486179 |
| 13.8024996914901 | 2.15301992589781 |
| 13.8049996914342 | 3.09432680143549 |
| 13.8074996913783 | 2.13813504066254 |
| 13.8099996913224 | 3.08010609733269 |
| 13.8124996912666 | 2.13275642182294 |
| 13.8149996912107 | 3.03020803742928 |
| 13.8174996911548 | 2.10495017507066 |
| 13.8199996910989 | 2.98972647518448 |
| 13.8224996910430 | 2.05285175203204 |
| 13.8249996909872 | 2.99719122471290 |
| 13.8274996909313 | 2.03384257009583 |
| 13.8299996908754 | 3.01378743047697 |
| 13.8324996908195 | 2.07099548683067 |
| 13.8349996907637 | 2.99005649834999 |
| 13.8374996907078 | 2.11711498248678 |
| 13.8399996906519 | 2.97604954338633 |
| 13.8424996905960 | 2.12108355306574 |
| 13.8449996905401 | 3.00488641660829 |
| 13.8474996904843 | 2.11689143307020 |
| 13.8499996904284 | 3.06012393201076 |
| 13.8524996903725 | 2.14145302623172 |
| 13.8549996903166 | 3.07394914139450 |
| 13.8574996902607 | 2.18298026301774 |
| 13.8599996902049 | 3.07910009624452 |
| 13.8624996901490 | 2.18909673956109 |
| 13.8649996900931 | 3.09864262028198 |
| 13.8674996900372 | 2.16238547699017 |
| 13.8699996899813 | 3.14090672686774 |
| 13.8724996899255 | 2.14446213452115 |
| 13.8749996898696 | 3.13927330834303 |
| 13.8774996898137 | 2.14622555769565 |
| 13.8799996897578 | 3.11984656808969 |
| 13.8824996897019 | 2.13559403433611 |
| 13.8849996896461 | 3.12054259540004 |
| 13.8874996895902 | 2.10124421316324 |
| 13.8899996895343 | 3.15071980869658 |
| 13.8924996894784 | 2.08405424770398 |
| 13.8949996894225 | 3.14604214197283 |
| 13.8974996893667 | 2.10123834662658 |
| 13.8999996893108 | 3.10880954668342 |
| 13.9024996892549 | 2.12426282289857 |
| 13.9049996891990 | 3.09008409783941 |
| 13.9074996891432 | 2.13453956822590 |
| 13.9099996890873 | 3.09761111085204 |
| 13.9124996890314 | 2.14485579434189 |
| 13.9149996889755 | 3.09424477724485 |
| 13.9174996889196 | 2.16280150345981 |
| 13.9199996888638 | 3.05727043069288 |
| 13.9224996888079 | 2.16655513823258 |

|                  |                  |
|------------------|------------------|
| 13.9249996887520 | 3.04069207670392 |
| 13.9274996886961 | 2.15145129420027 |
| 13.9299996886402 | 3.04032323775581 |
| 13.9324996885844 | 2.13515811291483 |
| 13.9349996885285 | 3.03266754025198 |
| 13.9374996884726 | 2.12783811670484 |
| 13.9399996884167 | 2.99126310569599 |
| 13.9424996883608 | 2.10872785667022 |
| 13.9449996883050 | 2.96522665756886 |
| 13.9474996882491 | 2.07328374262304 |
| 13.9499996881932 | 2.98196822233051 |
| 13.9524996881373 | 2.05043351797882 |
| 13.9549996880814 | 3.01072186959390 |
| 13.9574996880256 | 2.05955152224604 |
| 13.9599996879697 | 3.02636633319134 |
| 13.9624996879138 | 2.08503212805487 |
| 13.9649996878579 | 3.03420372834802 |
| 13.9674996878020 | 2.10111963345570 |
| 13.9699996877462 | 3.07117947408581 |
| 13.9724996876903 | 2.12824464265671 |
| 13.9749996876344 | 3.10573005389216 |
| 13.9774996875785 | 2.17432399522265 |
| 13.9799996875226 | 3.12800730435113 |
| 13.9824996874668 | 2.21560525174906 |
| 13.9849996874109 | 3.13069421251741 |
| 13.9874996873550 | 2.21285343409770 |
| 13.9899996872991 | 3.16072645076444 |
| 13.9924996872433 | 2.18504513413911 |
| 13.9949996871874 | 3.19276295940100 |
| 13.9974996871315 | 2.17380556284457 |
| 13.9999996870756 | 3.18597699177411 |
| 14.0024996870197 | 2.18013521097133 |
| 14.0049996869639 | 3.14530679381503 |
| 14.0074996869080 | 2.16417527665968 |
| 14.0099996868521 | 3.11343838503494 |
| 14.0124996867962 | 2.11340961382052 |
| 14.0149996867403 | 3.11122373313814 |
| 14.0174996866845 | 2.07208361669938 |
| 14.0199996866286 | 3.08807713415128 |
| 14.0224996865727 | 2.06621544004637 |
| 14.0249996865168 | 3.05611653637177 |
| 14.0274996864609 | 2.07841708926649 |
| 14.0299996864051 | 3.02700866295060 |
| 14.0324996863492 | 2.08472532213767 |
| 14.0349996862933 | 3.03788702289239 |
| 14.0374996862374 | 2.10241234444554 |
| 14.0399996861815 | 3.02328353927051 |
| 14.0424996861257 | 2.13480378226970 |
| 14.0449996860698 | 2.99519884284483 |
| 14.0474996860139 | 2.16254665869178 |
| 14.0499996859580 | 2.97704152954540 |
| 14.0524996859021 | 2.17053554614270 |

|                  |                  |
|------------------|------------------|
| 14.0549996858463 | 3.00584446901832 |
| 14.0574996857904 | 2.16496525840255 |
| 14.0599996857345 | 3.02687991858977 |
| 14.0624996856786 | 2.15031181985753 |
| 14.0649996856228 | 3.02209614921961 |
| 14.0674996855669 | 2.12053059923548 |
| 14.0699996855110 | 3.02228347572808 |
| 14.0724996854551 | 2.08672784639253 |
| 14.0749996853992 | 3.04698325843005 |
| 14.0774996853434 | 2.07877459660974 |
| 14.0799996852875 | 3.07337583678583 |
| 14.0824996852316 | 2.09693147933975 |
| 14.0849996851757 | 3.07203564747042 |
| 14.0874996851198 | 2.10206699194721 |
| 14.0899996850640 | 3.08473600495180 |
| 14.0924996850081 | 2.08369626807796 |
| 14.0949996849522 | 3.13059127586355 |
| 14.0974996848963 | 2.09494965773333 |
| 14.0999996848404 | 3.17653618035699 |
| 14.1024996847846 | 2.15710756702094 |
| 14.1049996847287 | 3.16637586199286 |
| 14.1074996846728 | 2.21984399053312 |
| 14.1099996846169 | 3.15443889670699 |
| 14.1124996845610 | 2.22963115413357 |
| 14.1149996845052 | 3.15788459075565 |
| 14.1174996844493 | 2.20902809377993 |
| 14.1199996843934 | 3.17584568820055 |
| 14.1224996843375 | 2.19984293756736 |
| 14.1249996842816 | 3.14509020376936 |
| 14.1274996842258 | 2.19702947913063 |
| 14.1299996841699 | 3.10718383007153 |
| 14.1324996841140 | 2.16583555571470 |
| 14.1349996840581 | 3.07696246932019 |
| 14.1374996840023 | 2.10317653032265 |
| 14.1399996839464 | 3.06700489417249 |
| 14.1424996838905 | 2.05566991807245 |
| 14.1449996838346 | 3.02591486539195 |
| 14.1474996837787 | 2.04344038694869 |
| 14.1499996837229 | 2.97819385859181 |
| 14.1524996836670 | 2.04791067976902 |
| 14.1549996836111 | 2.96635526918304 |
| 14.1574996835552 | 2.05124657115765 |
| 14.1599996834993 | 2.99109967019122 |
| 14.1624996834435 | 2.07363180473704 |
| 14.1649996833876 | 3.00948046629730 |
| 14.1674996833317 | 2.11732079569205 |
| 14.1699996832758 | 3.00218596822715 |
| 14.1724996832199 | 2.15891932678736 |
| 14.1749996831641 | 3.02582282755369 |
| 14.1774996831082 | 2.18680243101246 |
| 14.1799996830523 | 3.05448083597868 |
| 14.1824996829964 | 2.20535500200058 |

|                  |                  |
|------------------|------------------|
| 14.1849996829405 | 3.09074249168529 |
| 14.1874996828847 | 2.21248113774943 |
| 14.1899996828288 | 3.08100804695314 |
| 14.1924996827729 | 2.18896465799976 |
| 14.1949996827170 | 3.09985700637384 |
| 14.1974996826611 | 2.14353886047839 |
| 14.1999996826053 | 3.12410745579934 |
| 14.2024996825494 | 2.10832383061094 |
| 14.2049996824935 | 3.15020048655542 |
| 14.2074996824376 | 2.09983731805942 |
| 14.2099996823817 | 3.12965999894781 |
| 14.2124996823259 | 2.09080629399234 |
| 14.2149996822700 | 3.11243634276976 |
| 14.2174996822141 | 2.06986788295992 |
| 14.2199996821582 | 3.12462907499114 |
| 14.2224996821024 | 2.07416103811011 |
| 14.2249996820465 | 3.13623313029915 |
| 14.2274996819906 | 2.11637889779902 |
| 14.2299996819347 | 3.13106451282323 |
| 14.2324996818788 | 2.16430078194344 |
| 14.2349996818230 | 3.10955078164242 |
| 14.2374996817671 | 2.18266939981734 |
| 14.2399996817112 | 3.11396902256557 |
| 14.2424996816553 | 2.18859617540080 |
| 14.2449996815994 | 3.10538968104472 |
| 14.2474996815436 | 2.19940421044541 |
| 14.2499996814877 | 3.08272831503556 |
| 14.2524996814318 | 2.20356590112549 |
| 14.2549996813759 | 3.03502118726262 |
| 14.2574996813200 | 2.17259432920575 |
| 14.2599996812642 | 3.02255291985699 |
| 14.2624996812083 | 2.11350822420803 |
| 14.2649996811524 | 3.01408733697897 |
| 14.2674996810965 | 2.06640449123326 |
| 14.2699996810406 | 3.00117220305417 |
| 14.2724996809848 | 2.04802897563511 |
| 14.2749996809289 | 2.97156386140715 |
| 14.2774996808730 | 2.04170979548172 |
| 14.2799996808171 | 2.97796095427425 |
| 14.2824996807612 | 2.03755404901416 |
| 14.2849996807054 | 3.00974264062179 |
| 14.2874996806495 | 2.06202424871217 |
| 14.2899996805936 | 3.03134182692632 |
| 14.2924996805377 | 2.11251252502914 |
| 14.2949996804819 | 3.04276371680172 |
| 14.2974996804260 | 2.16304751984995 |
| 14.2999996803701 | 3.07643033151817 |
| 14.3024996803142 | 2.19521828960607 |
| 14.3049996802583 | 3.13199172564504 |
| 14.3074996802025 | 2.21978983318939 |
| 14.3099996801466 | 3.15900813447417 |
| 14.3124996800907 | 2.23296331612613 |



|                  |                  |
|------------------|------------------|
| 14.3149996800348 | 3.15191584018006 |
| 14.3174996799789 | 2.21997980047117 |
| 14.3199996799231 | 3.15237100781967 |
| 14.3224996798672 | 2.18577762820466 |
| 14.3249996798113 | 3.17549697654430 |
| 14.3274996797554 | 2.15686922890564 |
| 14.3299996796995 | 3.17297195517846 |
| 14.3324996796437 | 2.13300373595313 |
| 14.3349996795878 | 3.13544807935293 |
| 14.3374996795319 | 2.09063543334580 |
| 14.3399996794760 | 3.10431153100232 |
| 14.3424996794201 | 2.04229411775092 |
| 14.3449996793643 | 3.10760281851751 |
| 14.3474996793084 | 2.04395517367701 |
| 14.3499996792525 | 3.09684545473583 |
| 14.3524996791966 | 2.09437929702382 |
| 14.3549996791407 | 3.05728463857407 |
| 14.3574996790849 | 2.13479937278823 |
| 14.3599996790290 | 3.03025019103357 |
| 14.3624996789731 | 2.13748785227004 |
| 14.3649996789172 | 3.04235172531267 |
| 14.3674996788613 | 2.14367423376431 |
| 14.3699996788055 | 3.05509559885382 |
| 14.3724996787496 | 2.17587329219075 |
| 14.3749996786937 | 3.02930100943072 |
| 14.3774996786378 | 2.20219286685817 |
| 14.3799996785820 | 2.99862469324539 |
| 14.3824996785261 | 2.18189058089218 |
| 14.3849996784702 | 3.00166935157822 |
| 14.3874996784143 | 2.12692653463489 |
| 14.3899996783584 | 3.01983153392072 |
| 14.3924996783026 | 2.08588019782105 |
| 14.3949996782467 | 3.01326785843061 |
| 14.3974996781908 | 2.07081697325548 |
| 14.3999996781349 | 3.00590497012697 |
| 14.4024996780790 | 2.06349812364586 |
| 14.4049996780232 | 3.02975986509905 |
| 14.4074996779673 | 2.05115390138063 |
| 14.4099996779114 | 3.07381784278981 |
| 14.4124996778555 | 2.06596328706659 |
| 14.4149996777996 | 3.09272935075444 |
| 14.4174996777438 | 2.10977335832501 |
| 14.4199996776879 | 3.09405722490115 |
| 14.4224996776320 | 2.16017711232135 |
| 14.4249996775761 | 3.12313075510745 |
| 14.4274996775202 | 2.19474059500297 |
| 14.4299996774644 | 3.16403780459163 |
| 14.4324996774085 | 2.22000243659709 |
| 14.4349996773526 | 3.19218795845060 |
| 14.4374996772967 | 2.23262377521651 |
| 14.4399996772408 | 3.17271585961854 |
| 14.4424996771850 | 2.22207566656808 |



|                  |                  |
|------------------|------------------|
| 14.4449996771291 | 3.17186085979477 |
| 14.4474996770732 | 2.19457797754648 |
| 14.4499996770173 | 3.15937277601394 |
| 14.4524996769615 | 2.17047810740076 |
| 14.4549996769056 | 3.14630737582805 |
| 14.4574996768497 | 2.14811767841592 |
| 14.4599996767938 | 3.08925854396067 |
| 14.4624996767379 | 2.10432507751488 |
| 14.4649996766821 | 3.05132111032287 |
| 14.4674996766262 | 2.04525075851373 |
| 14.4699996765703 | 3.03806004435001 |
| 14.4724996765144 | 2.02055834039010 |
| 14.4749996764585 | 3.03442600274137 |
| 14.4774996764027 | 2.05251267399351 |
| 14.4799996763468 | 3.00456186309036 |
| 14.4824996762909 | 2.09970630014533 |
| 14.4849996762350 | 2.97396075620964 |
| 14.4874996761791 | 2.12120530279061 |
| 14.4899996761233 | 2.98803917083662 |
| 14.4924996760674 | 2.13526607684616 |
| 14.4949996760115 | 3.00668244567297 |
| 14.4974996759556 | 2.16197260734289 |
| 14.4999996758997 | 3.02367776998509 |
| 14.5024996758439 | 2.18709026610197 |
| 14.5049996757880 | 3.01798923782524 |
| 14.5074996757321 | 2.18088552313344 |
| 14.5099996756762 | 3.05625034957037 |
| 14.5124996756203 | 2.15120388222711 |
| 14.5149996755645 | 3.07393116597916 |
| 14.5174996755086 | 2.12821260936049 |
| 14.5199996754527 | 3.08637894938616 |
| 14.5224996753968 | 2.11689227489072 |
| 14.5249996753410 | 3.06877169100766 |
| 14.5274996752851 | 2.09978451194521 |
| 14.5299996752292 | 3.09792101051705 |
| 14.5324996751733 | 2.07574529649425 |
| 14.5349996751174 | 3.12768429230397 |
| 14.5374996750616 | 2.07959682885722 |
| 14.5399996750057 | 3.14127811878318 |
| 14.5424996749498 | 2.10826570462027 |
| 14.5449996748939 | 3.12487218106821 |
| 14.5474996748380 | 2.13875867657410 |
| 14.5499996747822 | 3.13451552889023 |
| 14.5524996747263 | 2.15983134003422 |
| 14.5549996746704 | 3.15543758682643 |
| 14.5574996746145 | 2.18900505426461 |
| 14.5599996745586 | 3.14830676492952 |
| 14.5624996745028 | 2.20994303343412 |
| 14.5649996744469 | 3.11826024926496 |
| 14.5674996743910 | 2.20611096119053 |
| 14.5699996743351 | 3.10211656162434 |
| 14.5724996742792 | 2.17787599957045 |

|                  |                  |
|------------------|------------------|
| 14.5749996742234 | 3.10749983522075 |
| 14.5774996741675 | 2.15317897234252 |
| 14.5799996741116 | 3.07659803285203 |
| 14.5824996740557 | 2.13122470174569 |
| 14.5849996739998 | 3.02739572036990 |
| 14.5874996739440 | 2.09854971009719 |
| 14.5899996738881 | 2.98158220845158 |
| 14.5924996738322 | 2.05560820379784 |
| 14.5949996737763 | 2.99043305438811 |
| 14.5974996737204 | 2.03818897386577 |
| 14.5999996736646 | 2.98756315017122 |
| 14.6024996736087 | 2.05259455830371 |
| 14.6049996735528 | 2.98358735334848 |
| 14.6074996734969 | 2.07260433995830 |
| 14.6099996734411 | 2.98289981514683 |
| 14.6124996733852 | 2.08797297439454 |
| 14.6149996733293 | 3.02723449076199 |
| 14.6174996732734 | 2.12603577111134 |
| 14.6199996732175 | 3.05098024801686 |
| 14.6224996731617 | 2.18160966169111 |
| 14.6249996731058 | 3.06301472762946 |
| 14.6274996730499 | 2.21168540561107 |
| 14.6299996729940 | 3.07836490492177 |
| 14.6324996729381 | 2.19520364335180 |
| 14.6349996728823 | 3.12860651834167 |
| 14.6374996728264 | 2.16698014497157 |
| 14.6399996727705 | 3.16323973902706 |
| 14.6424996727146 | 2.16641530686062 |
| 14.6449996726587 | 3.15849349250002 |
| 14.6474996726029 | 2.17192614874171 |
| 14.6499996725470 | 3.14188392633114 |
| 14.6524996724911 | 2.15147231069796 |
| 14.6549996724352 | 3.13993581955125 |
| 14.6574996723793 | 2.10738599458903 |
| 14.6599996723235 | 3.14867495507348 |
| 14.6624996722676 | 2.08879830151741 |
| 14.6649996722117 | 3.12336884628841 |
| 14.6674996721558 | 2.09433675963012 |
| 14.6699996720999 | 3.10027696099977 |
| 14.6724996720441 | 2.10851838923662 |
| 14.6749996719882 | 3.08929142865771 |
| 14.6774996719323 | 2.11164708338562 |
| 14.6799996718764 | 3.09450368489294 |
| 14.6824996718206 | 2.12454385780219 |
| 14.6849996717647 | 3.07121303589998 |
| 14.6874996717088 | 2.14272719922462 |
| 14.6899996716529 | 3.03567979781926 |
| 14.6924996715970 | 2.16118986742813 |
| 14.6949996715412 | 3.01651060716783 |
| 14.6974996714853 | 2.16276756592520 |
| 14.6999996714294 | 3.01793188102797 |
| 14.7024996713735 | 2.15200664860149 |

|                  |                  |
|------------------|------------------|
| 14.7049996713176 | 3.01768750280293 |
| 14.7074996712618 | 2.12929854341800 |
| 14.7099996712059 | 2.99762646322803 |
| 14.7124996711500 | 2.09993415094307 |
| 14.7149996710941 | 2.99293897713669 |
| 14.7174996710382 | 2.07699835232819 |
| 14.7199996709824 | 3.00134058062510 |
| 14.7224996709265 | 2.07768209029822 |
| 14.7249996708706 | 3.01799610895392 |
| 14.7274996708147 | 2.09536837370640 |
| 14.7299996707588 | 3.01626043866590 |
| 14.7324996707030 | 2.09623693466865 |
| 14.7349996706471 | 3.03374037323796 |
| 14.7374996705912 | 2.08489383153699 |
| 14.7399996705353 | 3.07922698467067 |
| 14.7424996704794 | 2.09946692571472 |
| 14.7449996704236 | 3.12172214698410 |
| 14.7474996703677 | 2.15597504719280 |
| 14.7499996703118 | 3.13529283017887 |
| 14.7524996702559 | 2.20410308737205 |
| 14.7549996702000 | 3.13386771576817 |
| 14.7574996701442 | 2.20816769784611 |
| 14.7599996700883 | 3.15715740241392 |
| 14.7624996700324 | 2.18779546001380 |
| 14.7649996699765 | 3.17393966062668 |
| 14.7674996699207 | 2.18557276929985 |
| 14.7699996698648 | 3.17469754789870 |
| 14.7724996698089 | 2.19038140239662 |
| 14.7749996697530 | 3.14353128029959 |
| 14.7774996696971 | 2.17487697499744 |
| 14.7799996696413 | 3.13532866739964 |
| 14.7824996695854 | 2.13164806541113 |
| 14.7849996695295 | 3.11581959742906 |
| 14.7874996694736 | 2.09754883661978 |
| 14.7899996694177 | 3.08741064674283 |
| 14.7924996693619 | 2.08361940529671 |
| 14.7949996693060 | 3.03362128328406 |
| 14.7974996692501 | 2.08492424953546 |
| 14.7999996691942 | 3.01406898056083 |
| 14.8024996691383 | 2.07904443807678 |
| 14.8049996690825 | 3.00886880685765 |
| 14.8074996690266 | 2.08060476665824 |
| 14.8099996689707 | 3.00523190799329 |
| 14.8124996689148 | 2.09146766148511 |
| 14.8149996688589 | 2.99014385133960 |
| 14.8174996688031 | 2.11286085714346 |
| 14.8199996687472 | 2.99154694595238 |
| 14.8224996686913 | 2.13640707309117 |
| 14.8249996686354 | 3.00711361156641 |
| 14.8274996685795 | 2.16172902147378 |
| 14.8299996685237 | 3.01195441436370 |
| 14.8324996684678 | 2.17113386439459 |

|                  |                  |
|------------------|------------------|
| 14.8349996684119 | 3.01726455474060 |
| 14.8374996683560 | 2.15544815709286 |
| 14.8399996683002 | 3.03426130184614 |
| 14.8424996682443 | 2.13133940315427 |
| 14.8449996681884 | 3.07907713497226 |
| 14.8474996681325 | 2.12132752250613 |
| 14.8499996680766 | 3.09172311519030 |
| 14.8524996680208 | 2.12516838747192 |
| 14.8549996679649 | 3.09889239510555 |
| 14.8574996679090 | 2.11560679658910 |
| 14.8599996678531 | 3.09444620810202 |
| 14.8624996677972 | 2.09824337414991 |
| 14.8649996677414 | 3.12500588728805 |
| 14.8674996676855 | 2.09917003569839 |
| 14.8699996676296 | 3.13246060756843 |
| 14.8724996675737 | 2.12871482293355 |
| 14.8749996675178 | 3.14155525907869 |
| 14.8774996674620 | 2.14910247122514 |
| 14.8799996674061 | 3.13915130728992 |
| 14.8824996673502 | 2.15030996613535 |
| 14.8849996672943 | 3.15930041008860 |
| 14.8874996672384 | 2.15434627116000 |
| 14.8899996671826 | 3.15049609851353 |
| 14.8924996671267 | 2.18088440124895 |
| 14.8949996670708 | 3.12123526920000 |
| 14.8974996670149 | 2.19788488616169 |
| 14.8999996669590 | 3.08774784922441 |
| 14.9024996669032 | 2.18710074123096 |
| 14.9049996668473 | 3.07199187633594 |
| 14.9074996667914 | 2.14824467633345 |
| 14.9099996667355 | 3.06268914046512 |
| 14.9124996666797 | 2.12055026782649 |
| 14.9149996666238 | 3.02758391209691 |
| 14.9174996665679 | 2.09933123392498 |
| 14.9199996665120 | 3.00019915948258 |
| 14.9224996664561 | 2.08014649621920 |
| 14.9249996664003 | 2.97503418092969 |
| 14.9274996663444 | 2.05520599425629 |
| 14.9299996662885 | 2.98115767551836 |
| 14.9324996662326 | 2.05376077873008 |
| 14.9349996661767 | 2.96624354647928 |
| 14.9374996661209 | 2.07090062206133 |
| 14.9399996660650 | 2.97748864368095 |
| 14.9424996660091 | 2.09671649816898 |
| 14.9449996659532 | 3.00204176331443 |
| 14.9474996658973 | 2.12239587328519 |
| 14.9499996658415 | 3.05581660335482 |
| 14.9524996657856 | 2.15136927890727 |
| 14.9549996657297 | 3.08153887628925 |
| 14.9574996656738 | 2.18071054889777 |
| 14.9599996656179 | 3.09820159698848 |
| 14.9624996655621 | 2.19791749368487 |

|                  |                  |
|------------------|------------------|
| 14.9649996655062 | 3.11279085307381 |
| 14.9674996654503 | 2.20709271332810 |
| 14.9699996653944 | 3.13911299932800 |
| 14.9724996653385 | 2.20119261668805 |
| 14.9749996652827 | 3.16070009211156 |
| 14.9774996652268 | 2.18378729209440 |
| 14.9799996651709 | 3.15720756763394 |
| 14.9824996651150 | 2.14295785193130 |
| 14.9849996650591 | 3.15570454695493 |
| 14.9874996650033 | 2.10706742703075 |
| 14.9899996649474 | 3.14972831612046 |
| 14.9924996648915 | 2.09359173254505 |
| 14.9949996648356 | 3.14163183182785 |
| 14.9974996647798 | 2.10963079488094 |
| 14.9999996647239 | 3.10475907273044 |
| 15.0024996646680 | 2.10995110510884 |
| 15.0049996646121 | 3.08129280516896 |
| 15.0074996645562 | 2.09633540487537 |
| 15.0099996645004 | 3.07609447550396 |
| 15.0124996644445 | 2.09404222201368 |
| 15.0149996643886 | 3.07910171498799 |
| 15.0174996643327 | 2.13236850534681 |
| 15.0199996642768 | 3.05585235224790 |
| 15.0224996642210 | 2.17263550459459 |
| 15.0249996641651 | 3.02821001132567 |
| 15.0274996641092 | 2.18461871963004 |
| 15.0299996640533 | 3.01436096307211 |
| 15.0324996639974 | 2.16869172874477 |
| 15.0349996639416 | 3.00564219273768 |
| 15.0374996638857 | 2.15557052181110 |
| 15.0399996638298 | 2.98967717259640 |
| 15.0424996637739 | 2.13952751880666 |
| 15.0449996637180 | 2.97823555822789 |
| 15.0474996636622 | 2.10882079689764 |
| 15.0499996636063 | 2.99823434364844 |
| 15.0524996635504 | 2.07148837369318 |
| 15.0549996634945 | 3.01682748393308 |
| 15.0574996634386 | 2.05153843592290 |
| 15.0599996633828 | 3.02186843323233 |
| 15.0624996633269 | 2.05965592984702 |
| 15.0649996632710 | 3.02073992741514 |
| 15.0674996632151 | 2.08128772402040 |
| 15.0699996631593 | 3.05775234582037 |
| 15.0724996631034 | 2.11494154076844 |
| 15.0749996630475 | 3.10107294520622 |
| 15.0774996629916 | 2.14750754807079 |
| 15.0799996629357 | 3.13325744587753 |
| 15.0824996628799 | 2.17834311983696 |
| 15.0849996628240 | 3.15316422444090 |
| 15.0874996627681 | 2.19712328402072 |
| 15.0899996627122 | 3.18294900335302 |
| 15.0924996626563 | 2.22121592040801 |

|                  |                  |
|------------------|------------------|
| 15.0949996626005 | 3.19938513449772 |
| 15.0974996625446 | 2.24226076174672 |
| 15.0999996624887 | 3.18376373383673 |
| 15.1024996624328 | 2.24663826869948 |
| 15.1049996623769 | 3.15068272265711 |
| 15.1074996623211 | 2.20501467002172 |
| 15.1099996622652 | 3.12983044540499 |
| 15.1124996622093 | 2.14678797454523 |
| 15.1149996621534 | 3.13048945323203 |
| 15.1174996620975 | 2.09890339395457 |
| 15.1199996620417 | 3.10410015222077 |
| 15.1224996619858 | 2.08071446415384 |
| 15.1249996619299 | 3.06277675712841 |
| 15.1274996618740 | 2.06205689865071 |
| 15.1299996618181 | 3.01735724679876 |
| 15.1324996617623 | 2.04472215944025 |
| 15.1349996617064 | 3.00797322296559 |
| 15.1374996616505 | 2.05319174392603 |
| 15.1399996615946 | 2.98951603247164 |
| 15.1424996615387 | 2.09694699743723 |
| 15.1449996614829 | 2.98163834253016 |
| 15.1474996614270 | 2.13744390515985 |
| 15.1499996613711 | 2.98380287392817 |
| 15.1524996613152 | 2.15566846808177 |
| 15.1549996612594 | 3.01994303073171 |
| 15.1574996612035 | 2.16990417770486 |
| 15.1599996611476 | 3.03882853409171 |
| 15.1624996610917 | 2.18991874352315 |
| 15.1649996610358 | 3.03471393533987 |
| 15.1674996609800 | 2.19818499511802 |
| 15.1699996609241 | 3.02977232169944 |
| 15.1724996608682 | 2.17309460476322 |
| 15.1749996608123 | 3.05292040708516 |
| 15.1774996607564 | 2.12927878219340 |
| 15.1799996607006 | 3.08497631478185 |
| 15.1824996606447 | 2.09457606127947 |
| 15.1849996605888 | 3.08777096721648 |
| 15.1874996605329 | 2.08269102159106 |
| 15.1899996604770 | 3.09696308728955 |
| 15.1924996604212 | 2.07673046994958 |
| 15.1949996603653 | 3.11133969180239 |
| 15.1974996603094 | 2.08143474638169 |
| 15.1999996602535 | 3.14353733959198 |
| 15.2024996601976 | 2.10970732375536 |
| 15.2049996601418 | 3.13271972041484 |
| 15.2074996600859 | 2.15394911070202 |
| 15.2099996600300 | 3.12622504146806 |
| 15.2124996599741 | 2.18262199335936 |
| 15.2149996599182 | 3.13150237015350 |
| 15.2174996598624 | 2.20006970515232 |
| 15.2199996598065 | 3.15938543168557 |
| 15.2224996597506 | 2.21030446191469 |



|                  |                  |
|------------------|------------------|
| 15.2249996596947 | 3.14682928645534 |
| 15.2274996596389 | 2.21589923542814 |
| 15.2299996595830 | 3.10959225089561 |
| 15.2324996595271 | 2.19305318790950 |
| 15.2349996594712 | 3.07648709323946 |
| 15.2374996594153 | 2.16014024230396 |
| 15.2399996593595 | 3.05957869812855 |
| 15.2424996593036 | 2.12484735767490 |
| 15.2449996592477 | 3.03622402860708 |
| 15.2474996591918 | 2.09413388180555 |
| 15.2499996591359 | 2.99256703822671 |
| 15.2524996590801 | 2.04413879616747 |
| 15.2549996590242 | 2.97917779224688 |
| 15.2574996589683 | 2.00690399642484 |
| 15.2599996589124 | 2.99073986037385 |
| 15.2624996588565 | 2.02612912675698 |
| 15.2649996588007 | 3.00226559572617 |
| 15.2674996587448 | 2.09553097557850 |
| 15.2699996586889 | 2.98647784644621 |
| 15.2724996586330 | 2.15127050449426 |
| 15.2749996585771 | 3.00037839734008 |
| 15.2774996585213 | 2.16740960602974 |
| 15.2799996584654 | 3.04576389907179 |
| 15.2824996584095 | 2.17984100507101 |
| 15.2849996583536 | 3.09564554935639 |
| 15.2874996582977 | 2.20868292396419 |
| 15.2899996582419 | 3.10308867407475 |
| 15.2924996581860 | 2.23429250114326 |
| 15.2949996581301 | 3.10829711840374 |
| 15.2974996580742 | 2.21198218642149 |
| 15.2999996580184 | 3.13026872553156 |
| 15.3024996579625 | 2.15916431029276 |
| 15.3049996579066 | 3.15219080942334 |
| 15.3074996578507 | 2.11839546336703 |
| 15.3099996577948 | 3.13472278422527 |
| 15.3124996577390 | 2.10793983597089 |
| 15.3149996576831 | 3.10923593855307 |
| 15.3174996576272 | 2.09069823751516 |
| 15.3199996575713 | 3.11929453718513 |
| 15.3224996575154 | 2.06944242131860 |
| 15.3249996574596 | 3.13802786499563 |
| 15.3274996574037 | 2.06983226885779 |
| 15.3299996573478 | 3.12374703516610 |
| 15.3324996572919 | 2.10492089627140 |
| 15.3349996572360 | 3.08674521043169 |
| 15.3374996571802 | 2.14449168541312 |
| 15.3399996571243 | 3.08187981162439 |
| 15.3424996570684 | 2.18576498383083 |
| 15.3449996570125 | 3.08302757604177 |
| 15.3474996569566 | 2.21071293430242 |
| 15.3499996569008 | 3.07241192524261 |
| 15.3524996568449 | 2.21317174200897 |

|                  |                  |
|------------------|------------------|
| 15.3549996567890 | 3.04013246875297 |
| 15.3574996567331 | 2.18143629335216 |
| 15.3599996566772 | 3.03976339696908 |
| 15.3624996566214 | 2.14647525301248 |
| 15.3649996565655 | 3.03455600419122 |
| 15.3674996565096 | 2.12283511070573 |
| 15.3699996564537 | 3.01659378781201 |
| 15.3724996563978 | 2.10473982114108 |
| 15.3749996563420 | 2.97815438419670 |
| 15.3774996562861 | 2.06209880104010 |
| 15.3799996562302 | 2.97177909136968 |
| 15.3824996561743 | 2.01578039598043 |
| 15.3849996561185 | 3.00294934412770 |
| 15.3874996560626 | 2.01905347552114 |
| 15.3899996560067 | 3.03279587531011 |
| 15.3924996559508 | 2.07500388143517 |
| 15.3949996558949 | 3.05252831176813 |
| 15.3974996558391 | 2.13790271452983 |
| 15.3999996557832 | 3.07234949065190 |
| 15.4024996557273 | 2.17091765748519 |
| 15.4049996556714 | 3.11975282375063 |
| 15.4074996556155 | 2.20200322496108 |
| 15.4099996555597 | 3.14582298048666 |
| 15.4124996555038 | 2.23487451025376 |
| 15.4149996554479 | 3.16135398332724 |
| 15.4174996553920 | 2.25975161554318 |
| 15.4199996553361 | 3.16120342436152 |
| 15.4224996552803 | 2.23722460279942 |
| 15.4249996552244 | 3.18940920159831 |
| 15.4274996551685 | 2.19374359383110 |
| 15.4299996551126 | 3.19294948974800 |
| 15.4324996550567 | 2.15424435265385 |
| 15.4349996550009 | 3.16730292957431 |
| 15.4374996549450 | 2.13029500692862 |
| 15.4399996548891 | 3.11720849331225 |
| 15.4424996548332 | 2.09572948220805 |
| 15.4449996547773 | 3.09369373760768 |
| 15.4474996547215 | 2.06294776550692 |
| 15.4499996546656 | 3.08242187851663 |
| 15.4524996546097 | 2.05087977784389 |
| 15.4549996545538 | 3.04983422958478 |
| 15.4574996544980 | 2.06442091676044 |
| 15.4599996544421 | 3.02239788974847 |
| 15.4624996543862 | 2.08632303481748 |
| 15.4649996543303 | 3.01539221989263 |
| 15.4674996542744 | 2.11848617510925 |
| 15.4699996542186 | 3.02981206821182 |
| 15.4724996541627 | 2.16259301054891 |
| 15.4749996541068 | 3.00899139024591 |
| 15.4774996540509 | 2.19657114985948 |
| 15.4799996539950 | 2.98817729291453 |
| 15.4824996539392 | 2.19902319159985 |

|                  |                  |
|------------------|------------------|
| 15.4849996538833 | 2.99035368445490 |
| 15.4874996538274 | 2.17220670023228 |
| 15.4899996537715 | 3.03105572340216 |
| 15.4924996537156 | 2.14310799663223 |
| 15.4949996536598 | 3.04439680390730 |
| 15.4974996536039 | 2.11618081215122 |
| 15.4999996535480 | 3.03948843262431 |
| 15.5024996534921 | 2.08491961109631 |
| 15.5049996534362 | 3.03919672077294 |
| 15.5074996533804 | 2.05524337507654 |
| 15.5099996533245 | 3.07025550543501 |
| 15.5124996532686 | 2.06362472189180 |
| 15.5149996532127 | 3.09011188707221 |
| 15.5174996531568 | 2.09643712563888 |
| 15.5199996531010 | 3.09236367032259 |
| 15.5224996530451 | 2.11894033557484 |
| 15.5249996529892 | 3.11340661536106 |
| 15.5274996529333 | 2.12099913010001 |
| 15.5299996528774 | 3.16342284490850 |
| 15.5324996528216 | 2.15339890038934 |
| 15.5349996527657 | 3.19147078345486 |
| 15.5374996527098 | 2.21106696536355 |
| 15.5399996526539 | 3.17152855011365 |
| 15.5424996525981 | 2.25207659328230 |
| 15.5449996525422 | 3.14963493182448 |
| 15.5474996524863 | 2.23695660651721 |
| 15.5499996524304 | 3.14766493699393 |
| 15.5524996523745 | 2.20252745097218 |
| 15.5549996523187 | 3.15133070675913 |
| 15.5574996522628 | 2.17544822519085 |
| 15.5599996522069 | 3.11426266117423 |
| 15.5624996521510 | 2.15359959576008 |
| 15.5649996520951 | 3.07550211209910 |
| 15.5674996520393 | 2.10866207466370 |
| 15.5699996519834 | 3.04545280725116 |
| 15.5724996519275 | 2.05425714155677 |
| 15.5749996518716 | 3.03255854776359 |
| 15.5774996518157 | 2.03231053152662 |
| 15.5799996517599 | 2.98786841671483 |
| 15.5824996517040 | 2.04898079587243 |
| 15.5849996516481 | 2.95220712334162 |
| 15.5874996515922 | 2.07515448445796 |
| 15.5899996515363 | 2.95458253782171 |
| 15.5924996514805 | 2.08930950934537 |
| 15.5949996514246 | 2.99577462064505 |
| 15.5974996513687 | 2.11033963323893 |
| 15.5999996513128 | 3.02081447107514 |
| 15.6024996512569 | 2.14170547044756 |
| 15.6049996512011 | 3.02966783225158 |
| 15.6074996511452 | 2.17500976712152 |
| 15.6099996510893 | 3.04899262653831 |
| 15.6124996510334 | 2.19354709879022 |

|                  |                  |
|------------------|------------------|
| 15.6149996509776 | 3.07828674700360 |
| 15.6174996509217 | 2.20087420012276 |
| 15.6199996508658 | 3.10645204715734 |
| 15.6224996508099 | 2.18571052476352 |
| 15.6249996507540 | 3.10428633227188 |
| 15.6274996506982 | 2.14932708378553 |
| 15.6299996506423 | 3.12432495223560 |
| 15.6324996505864 | 2.10796252643684 |
| 15.6349996505305 | 3.14792503737255 |
| 15.6374996504746 | 2.10073998933423 |
| 15.6399996504188 | 3.16106905644420 |
| 15.6424996503629 | 2.11786657262491 |
| 15.6449996503070 | 3.13246313057153 |
| 15.6474996502511 | 2.12121389474423 |
| 15.6499996501952 | 3.11207919120915 |
| 15.6524996501394 | 2.09963931483791 |
| 15.6549996500835 | 3.11613241571599 |
| 15.6574996500276 | 2.10370257358710 |
| 15.6599996499717 | 3.12438750360931 |
| 15.6624996499158 | 2.13871463888851 |
| 15.6649996498600 | 3.10956911136607 |
| 15.6674996498041 | 2.17345815820181 |
| 15.6699996497482 | 3.08385561838472 |
| 15.6724996496923 | 2.16951243000588 |
| 15.6749996496364 | 3.07660593798133 |
| 15.6774996495806 | 2.15208228474703 |
| 15.6799996495247 | 3.06630731604792 |
| 15.6824996494688 | 2.14727474319450 |
| 15.6849996494129 | 3.03863318782212 |
| 15.6874996493571 | 2.15344064358482 |
| 15.6899996493012 | 2.99672688268134 |
| 15.6924996492453 | 2.13625243246883 |
| 15.6949996491894 | 2.98933249786537 |
| 15.6974996491335 | 2.08964673262947 |
| 15.6999996490777 | 2.99967250816968 |
| 15.7024996490218 | 2.05563930385683 |
| 15.7049996489659 | 3.00207235318555 |
| 15.7074996489100 | 2.05637601365631 |
| 15.7099996488541 | 2.98460213389591 |
| 15.7124996487983 | 2.07888872917504 |
| 15.7149996487424 | 2.99148651734368 |
| 15.7174996486865 | 2.09149714845180 |
| 15.7199996486306 | 3.02790550787521 |
| 15.7224996485747 | 2.10850663980126 |
| 15.7249996485189 | 3.05973773036726 |
| 15.7274996484630 | 2.13057789750621 |
| 15.7299996484071 | 3.07676526717834 |
| 15.7324996483512 | 2.15744092029863 |
| 15.7349996482953 | 3.10730363810700 |
| 15.7374996482395 | 2.17329504031758 |
| 15.7399996481836 | 3.15206293508061 |
| 15.7424996481277 | 2.19033329601912 |

|                  |                  |
|------------------|------------------|
| 15.7449996480718 | 3.17145656105235 |
| 15.7474996480159 | 2.19846670630465 |
| 15.7499996479601 | 3.15878031810539 |
| 15.7524996479042 | 2.19220474728936 |
| 15.7549996478483 | 3.14555744581672 |
| 15.7574996477924 | 2.16764172722016 |
| 15.7599996477365 | 3.15603748763414 |
| 15.7624996476807 | 2.14953469773019 |
| 15.7649996476248 | 3.14993950008726 |
| 15.7674996475689 | 2.13378223007152 |
| 15.7699996475130 | 3.12125635851719 |
| 15.7724996474572 | 2.11072113449598 |
| 15.7749996474013 | 3.08187068715707 |
| 15.7774996473454 | 2.07985930969044 |
| 15.7799996472895 | 3.06584825715233 |
| 15.7824996472336 | 2.07409405101890 |
| 15.7849996471778 | 3.04352332140646 |
| 15.7874996471219 | 2.09195618069452 |
| 15.7899996470660 | 3.01741949225128 |
| 15.7924996470101 | 2.10768759490158 |
| 15.7949996469542 | 2.99751060661176 |
| 15.7974996468984 | 2.10601360867493 |
| 15.7999996468425 | 3.00623484871043 |
| 15.8024996467866 | 2.10975745141971 |
| 15.8049996467307 | 3.01617735929454 |
| 15.8074996466748 | 2.13530937041427 |
| 15.8099996466190 | 3.00768930085307 |
| 15.8124996465631 | 2.16006008187666 |
| 15.8149996465072 | 3.00275094048807 |
| 15.8174996464513 | 2.16282431226579 |
| 15.8199996463954 | 3.00981557754242 |
| 15.8224996463396 | 2.14254650768752 |
| 15.8249996462837 | 3.03162516102189 |
| 15.8274996462278 | 2.12960487163347 |
| 15.8299996461719 | 3.03666773317744 |
| 15.8324996461160 | 2.11826340610912 |
| 15.8349996460602 | 3.05411149913129 |
| 15.8374996460043 | 2.10714709000416 |
| 15.8399996459484 | 3.07274508071952 |
| 15.8424996458925 | 2.08948749768119 |
| 15.8449996458367 | 3.10430687144699 |
| 15.8474996457808 | 2.09268228483017 |
| 15.8499996457249 | 3.10665525120168 |
| 15.8524996456690 | 2.11121856921873 |
| 15.8549996456131 | 3.11056105054394 |
| 15.8574996455573 | 2.13991516011523 |
| 15.8599996455014 | 3.12065817394007 |
| 15.8624996454455 | 2.15799321219160 |
| 15.8649996453896 | 3.14958814232925 |
| 15.8674996453337 | 2.17251802560876 |
| 15.8699996452779 | 3.16048398508124 |
| 15.8724996452220 | 2.18120374899504 |

|                  |                  |
|------------------|------------------|
| 15.8749996451661 | 3.14710817810685 |
| 15.8774996451102 | 2.18692540412219 |
| 15.8799996450543 | 3.13394733977790 |
| 15.8824996449985 | 2.18676441706440 |
| 15.8849996449426 | 3.11811782563488 |
| 15.8874996448867 | 2.18338412691194 |
| 15.8899996448308 | 3.10259147173665 |
| 15.8924996447749 | 2.16640408589833 |
| 15.8949996447191 | 3.05738636029878 |
| 15.8974996446632 | 2.12602692673117 |
| 15.8999996446073 | 3.03071674137192 |
| 15.9024996445514 | 2.07786042807018 |
| 15.9049996444955 | 3.01654432539189 |
| 15.9074996444397 | 2.05801257742197 |
| 15.9099996443838 | 3.01641653210826 |
| 15.9124996443279 | 2.07949221318884 |
| 15.9149996442720 | 2.98157668141891 |
| 15.9174996442162 | 2.10277939894346 |
| 15.9199996441603 | 2.96077261528490 |
| 15.9224996441044 | 2.10629141680466 |
| 15.9249996440485 | 2.96162752086180 |
| 15.9274996439926 | 2.11059081518091 |
| 15.9299996439368 | 2.98923587948910 |
| 15.9324996438809 | 2.14165948223008 |
| 15.9349996438250 | 2.99885924309711 |
| 15.9374996437691 | 2.17055816756198 |
| 15.9399996437132 | 3.01249065939880 |
| 15.9424996436574 | 2.17268532378598 |
| 15.9449996436015 | 3.04330662504799 |
| 15.9474996435456 | 2.14775081517223 |
| 15.9499996434897 | 3.07960396342663 |
| 15.9524996434338 | 2.13544979829262 |
| 15.9549996433780 | 3.09704994884777 |
| 15.9574996433221 | 2.13906776734563 |
| 15.9599996432662 | 3.09271691498996 |
| 15.9624996432103 | 2.14525150446236 |
| 15.9649996431544 | 3.11004736099549 |
| 15.9674996430986 | 2.12708825911150 |
| 15.9699996430427 | 3.13211515627076 |
| 15.9724996429868 | 2.11151793448647 |
| 15.9749996429309 | 3.15001446918867 |
| 15.9774996428750 | 2.11786642251725 |
| 15.9799996428192 | 3.13415548341862 |
| 15.9824996427633 | 2.14681151006603 |
| 15.9849996427074 | 3.12696180563466 |
| 15.9874996426515 | 2.17025112036948 |
| 15.9899996425956 | 3.11257165449183 |
| 15.9924996425398 | 2.18021641163899 |
| 15.9949996424839 | 3.10447493016049 |
| 15.9974996424280 | 2.17346003035045 |
| 15.9999996423721 | 3.07284201870614 |
| 16.0024996423163 | 2.15924164832309 |



|                  |                  |
|------------------|------------------|
| 16.0049996422604 | 3.06129280579382 |
| 16.0074996422045 | 2.14180862352219 |
| 16.0099996421486 | 3.04851750871501 |
| 16.0124996420927 | 2.12888060540886 |
| 16.0149996420369 | 3.03732349962496 |
| 16.0174996419810 | 2.11634210519684 |
| 16.0199996419251 | 3.00704051513078 |
| 16.0224996418692 | 2.09714743504027 |
| 16.0249996418133 | 2.98652557336397 |
| 16.0274996417575 | 2.07910293913745 |
| 16.0299996417016 | 2.98781171153789 |
| 16.0324996416457 | 2.07942923377690 |
| 16.0349996415898 | 2.99531925466151 |
| 16.0374996415339 | 2.10017746485791 |
| 16.0399996414781 | 3.00831929845238 |
| 16.0424996414222 | 2.11853812111418 |
| 16.0449996413663 | 3.02022002905898 |
| 16.0474996413104 | 2.13070607261842 |
| 16.0499996412545 | 3.04824617319862 |
| 16.0524996411987 | 2.14583077938732 |
| 16.0549996411428 | 3.06170429802635 |
| 16.0574996410869 | 2.17036847917905 |
| 16.0599996410310 | 3.08061092210279 |
| 16.0624996409751 | 2.18287069296741 |
| 16.0649996409193 | 3.09191480857041 |
| 16.0674996408634 | 2.17641775785004 |
| 16.0699996408075 | 3.12268274750494 |
| 16.0724996407516 | 2.15733139785940 |
| 16.0749996406958 | 3.13798783661601 |
| 16.0774996406399 | 2.14908848584510 |
| 16.0799996405840 | 3.14624983079125 |
| 16.0824996405281 | 2.14652941900664 |
| 16.0849996404722 | 3.13857927052831 |
| 16.0874996404164 | 2.14164456355834 |
| 16.0899996403605 | 3.13799588577965 |
| 16.0924996403046 | 2.12787882161132 |
| 16.0949996402487 | 3.13268771217704 |
| 16.0974996401928 | 2.12776304358357 |
| 16.0999996401370 | 3.11430087383268 |
| 16.1024996400811 | 2.13478120981449 |
| 16.1049996400252 | 3.09377216035619 |
| 16.1074996399693 | 2.14229698277666 |
| 16.1099996399134 | 3.07515795677051 |
| 16.1124996398576 | 2.13773668554899 |
| 16.1149996398017 | 3.06485204695202 |
| 16.1174996397458 | 2.13503331609064 |
| 16.1199996396899 | 3.03808012713473 |
| 16.1224996396340 | 2.13214161116001 |
| 16.1249996395782 | 3.00842387533755 |
| 16.1274996395223 | 2.12810748352263 |
| 16.1299996394664 | 2.98777584491642 |
| 16.1324996394105 | 2.11620183873963 |

|                  |                  |
|------------------|------------------|
| 16.1349996393546 | 2.99311013403349 |
| 16.1374996392988 | 2.10024972762431 |
| 16.1399996392429 | 2.99664946209746 |
| 16.1424996391870 | 2.08789852472001 |
| 16.1449996391311 | 2.99458044600341 |
| 16.1474996390752 | 2.08187509180282 |
| 16.1499996390194 | 2.99915567926625 |
| 16.1524996389635 | 2.09272883789515 |
| 16.1549996389076 | 3.02131412230076 |
| 16.1574996388517 | 2.11639805184138 |
| 16.1599996387959 | 3.04740268042738 |
| 16.1624996387400 | 2.14756453868586 |
| 16.1649996386841 | 3.06024408417678 |
| 16.1674996386282 | 2.15990767628850 |
| 16.1699996385723 | 3.07857060733143 |
| 16.1724996385165 | 2.16104583424554 |
| 16.1749996384606 | 3.10322171222199 |
| 16.1774996384047 | 2.16317146749165 |
| 16.1799996383488 | 3.12795764984183 |
| 16.1824996382929 | 2.18026728722833 |
| 16.1849996382371 | 3.12520320813687 |
| 16.1874996381812 | 2.18079705512526 |
| 16.1899996381253 | 3.12194629687668 |
| 16.1924996380694 | 2.15301949088089 |
| 16.1949996380135 | 3.12356578386849 |
| 16.1974996379577 | 2.11481063024329 |
| 16.1999996379018 | 3.13242466221695 |
| 16.2024996378459 | 2.10774820788846 |
| 16.2049996377900 | 3.11661094586748 |
| 16.2074996377341 | 2.11969786995529 |
| 16.2099996376783 | 3.09675253907638 |
| 16.2124996376224 | 2.12365505072128 |
| 16.2149996375665 | 3.08450269322706 |
| 16.2174996375106 | 2.11272281956081 |
| 16.2199996374547 | 3.07529961313365 |
| 16.2224996373989 | 2.11725289194607 |
| 16.2249996373430 | 3.05628717746517 |
| 16.2274996372871 | 2.14012610276638 |
| 16.2299996372312 | 3.02804372703731 |
| 16.2324996371754 | 2.16069463373449 |
| 16.2349996371195 | 3.01713713382902 |
| 16.2374996370636 | 2.16116485167051 |
| 16.2399996370077 | 3.00342165784793 |
| 16.2424996369518 | 2.14020261914310 |
| 16.2449996368960 | 2.99669756158308 |
| 16.2474996368401 | 2.11564525682852 |
| 16.2499996367842 | 2.97968606326807 |
| 16.2524996367283 | 2.09560364187649 |
| 16.2549996366724 | 2.98868696125021 |
| 16.2574996366166 | 2.09171364622144 |
| 16.2599996365607 | 2.99273833712221 |
| 16.2624996365048 | 2.08542377811370 |

|                  |                  |
|------------------|------------------|
| 16.2649996364489 | 3.01296376536111 |
| 16.2674996363930 | 2.07862379831729 |
| 16.2699996363372 | 3.02359460781501 |
| 16.2724996362813 | 2.07796141939281 |
| 16.2749996362254 | 3.05767899670142 |
| 16.2774996361695 | 2.10930384054171 |
| 16.2799996361136 | 3.08175677602127 |
| 16.2824996360578 | 2.15569119112409 |
| 16.2849996360019 | 3.10694239353001 |
| 16.2874996359460 | 2.19797751693892 |
| 16.2899996358901 | 3.12036602039008 |
| 16.2924996358342 | 2.20940364790819 |
| 16.2949996357784 | 3.13423496579851 |
| 16.2974996357225 | 2.20144200191852 |
| 16.2999996356666 | 3.15209762437666 |
| 16.3024996356107 | 2.18896301126744 |
| 16.3049996355549 | 3.15354033552213 |
| 16.3074996354990 | 2.18536885147222 |
| 16.3099996354431 | 3.14868452142160 |
| 16.3124996353872 | 2.17001856577611 |
| 16.3149996353313 | 3.11957253179807 |
| 16.3174996352755 | 2.13129292649931 |
| 16.3199996352196 | 3.10897156117727 |
| 16.3224996351637 | 2.08805066378692 |
| 16.3249996351078 | 3.08235396178570 |
| 16.3274996350519 | 2.06995570931095 |
| 16.3299996349961 | 3.06776743745301 |
| 16.3324996349402 | 2.07690267964606 |
| 16.3349996348843 | 3.03605515944259 |
| 16.3374996348284 | 2.08767077983623 |
| 16.3399996347725 | 3.03482433933844 |
| 16.3424996347167 | 2.10214497791446 |
| 16.3449996346608 | 3.02232028218801 |
| 16.3474996346049 | 2.12562486176771 |
| 16.3499996345490 | 3.01859421802567 |
| 16.3524996344931 | 2.15619700650706 |
| 16.3549996344373 | 2.99954277428427 |
| 16.3574996343814 | 2.17495924385240 |
| 16.3599996343255 | 3.00061933451763 |
| 16.3624996342696 | 2.17625937508974 |
| 16.3649996342137 | 3.00644066226044 |
| 16.3674996341579 | 2.15807365246833 |
| 16.3699996341020 | 3.01330894219378 |
| 16.3724996340461 | 2.13364290133799 |
| 16.3749996339902 | 3.02129925175726 |
| 16.3774996339343 | 2.10456742955554 |
| 16.3799996338785 | 3.03294749379428 |
| 16.3824996338226 | 2.08233719442049 |
| 16.3849996337667 | 3.06063756070365 |
| 16.3874996337108 | 2.07254745591844 |
| 16.3899996336550 | 3.06900826086881 |
| 16.3924996335991 | 2.08139766525020 |

|                  |                  |
|------------------|------------------|
| 16.3949996335432 | 3.08222843196315 |
| 16.3974996334873 | 2.10024140465471 |
| 16.3999996334314 | 3.09222310493502 |
| 16.4024996333756 | 2.12939019053695 |
| 16.4049996333197 | 3.13074605770270 |
| 16.4074996332638 | 2.16294682900644 |
| 16.4099996332079 | 3.14819487302343 |
| 16.4124996331520 | 2.19624479233167 |
| 16.4149996330962 | 3.15783588482334 |
| 16.4174996330403 | 2.21309585030766 |
| 16.4199996329844 | 3.14805861805860 |
| 16.4224996329285 | 2.21614935206768 |
| 16.4249996328726 | 3.15206658726842 |
| 16.4274996328168 | 2.21121393625967 |
| 16.4299996327609 | 3.13351682628720 |
| 16.4324996327050 | 2.19770151340486 |
| 16.4349996326491 | 3.10461056059999 |
| 16.4374996325932 | 2.15741443139537 |
| 16.4399996325374 | 3.07202646498659 |
| 16.4424996324815 | 2.09729791937197 |
| 16.4449996324256 | 3.05960307685196 |
| 16.4474996323697 | 2.05385886870885 |
| 16.4499996323138 | 3.04371180950595 |
| 16.4524996322580 | 2.05081693630173 |
| 16.4549996322021 | 3.01118140307322 |
| 16.4574996321462 | 2.06709847593989 |
| 16.4599996320903 | 2.98804561764207 |
| 16.4624996320345 | 2.07736378865836 |
| 16.4649996319786 | 2.98730029288620 |
| 16.4674996319227 | 2.09539870563122 |
| 16.4699996318668 | 3.00087264020135 |
| 16.4724996318109 | 2.13427386160961 |
| 16.4749996317551 | 3.00151741540525 |
| 16.4774996316992 | 2.17773002878548 |
| 16.4799996316433 | 3.01208973368158 |
| 16.4824996315874 | 2.19325378713500 |
| 16.4849996315315 | 3.03642040924375 |
| 16.4874996314757 | 2.18116074134416 |
| 16.4899996314198 | 3.06746482438609 |
| 16.4924996313639 | 2.16203498927931 |
| 16.4949996313080 | 3.07565227134717 |
| 16.4974996312521 | 2.15132109747801 |
| 16.4999996311963 | 3.07869519998651 |
| 16.5024996311404 | 2.13715218449997 |
| 16.5049996310845 | 3.08911089545293 |
| 16.5074996310286 | 2.11374303166539 |
| 16.5099996309727 | 3.11155104486782 |
| 16.5124996309169 | 2.08534107484291 |
| 16.5149996308610 | 3.12357973612985 |
| 16.5174996308051 | 2.07718583753452 |
| 16.5199996307492 | 3.12151302055446 |
| 16.5224996306933 | 2.09433445753012 |

|                  |                  |
|------------------|------------------|
| 16.5249996306375 | 3.12600663499392 |
| 16.5274996305816 | 2.13387330907484 |
| 16.5299996305257 | 3.12843349700054 |
| 16.5324996304698 | 2.17095815523331 |
| 16.5349996304139 | 3.12997951895679 |
| 16.5374996303581 | 2.19393254798273 |
| 16.5399996303022 | 3.11280919333614 |
| 16.5424996302463 | 2.19441665195514 |
| 16.5449996301904 | 3.10276795286676 |
| 16.5474996301346 | 2.18839173704115 |
| 16.5499996300787 | 3.09617193760586 |
| 16.5524996300228 | 2.18127979998005 |
| 16.5549996299669 | 3.08132239926707 |
| 16.5574996299110 | 2.16892393266085 |
| 16.5599996298552 | 3.05503788961954 |
| 16.5624996297993 | 2.13539499598786 |
| 16.5649996297434 | 3.02127834895380 |
| 16.5674996296875 | 2.08611000624536 |
| 16.5699996296316 | 3.00694564464973 |
| 16.5724996295758 | 2.05102660903363 |
| 16.5749996295199 | 2.99720978701892 |
| 16.5774996294640 | 2.05206576653357 |
| 16.5799996294081 | 2.99719649407158 |
| 16.5824996293522 | 2.07748914250183 |
| 16.5849996292964 | 2.98975366521291 |
| 16.5874996292405 | 2.09452795023700 |
| 16.5899996291846 | 3.01234243754624 |
| 16.5924996291287 | 2.10983416056334 |
| 16.5949996290728 | 3.03199068237635 |
| 16.5974996290170 | 2.13850237354720 |
| 16.5999996289611 | 3.05904192941091 |
| 16.6024996289052 | 2.18036983145406 |
| 16.6049996288493 | 3.06706570424877 |
| 16.6074996287934 | 2.20253453022944 |
| 16.6099996287376 | 3.09552170423420 |
| 16.6124996286817 | 2.19827831095815 |
| 16.6149996286258 | 3.12040750068336 |
| 16.6174996285699 | 2.17776800142302 |
| 16.6199996285141 | 3.13931821155900 |
| 16.6224996284582 | 2.15945909294457 |
| 16.6249996284023 | 3.14092435296713 |
| 16.6274996283464 | 2.14059731502798 |
| 16.6299996282905 | 3.14355900889104 |
| 16.6324996282347 | 2.12279442464338 |
| 16.6349996281788 | 3.14966535824506 |
| 16.6374996281229 | 2.10864019494341 |
| 16.6399996280670 | 3.13500508643766 |
| 16.6424996280111 | 2.10497770800952 |
| 16.6449996279553 | 3.11757807983345 |
| 16.6474996278994 | 2.10900709112938 |
| 16.6499996278435 | 3.09878795830789 |
| 16.6524996277876 | 2.12285637639219 |

|                  |                  |
|------------------|------------------|
| 16.6549996277317 | 3.10224535315455 |
| 16.6574996276759 | 2.14270588586348 |
| 16.6599996276200 | 3.07811332893479 |
| 16.6624996275641 | 2.15881619385116 |
| 16.6649996275082 | 3.06077272051111 |
| 16.6674996274523 | 2.16086132014551 |
| 16.6699996273965 | 3.03371445056353 |
| 16.6724996273406 | 2.15331896346593 |
| 16.6749996272847 | 3.03925022041194 |
| 16.6774996272288 | 2.14548191691424 |
| 16.6799996271729 | 3.02050065072498 |
| 16.6824996271171 | 2.13465162968598 |
| 16.6849996270612 | 3.00889145409584 |
| 16.6874996270053 | 2.11177347698043 |
| 16.6899996269494 | 2.99394833613324 |
| 16.6924996268936 | 2.08300026165577 |
| 16.6949996268377 | 3.01077845105365 |
| 16.6974996267818 | 2.07347089335804 |
| 16.6999996267259 | 3.02326457508403 |
| 16.7024996266700 | 2.08826346844214 |
| 16.7049996266142 | 3.03027594037309 |
| 16.7074996265583 | 2.10857119173577 |
| 16.7099996265024 | 3.04223447883985 |
| 16.7124996264465 | 2.11819436244883 |
| 16.7149996263906 | 3.06663028917116 |
| 16.7174996263348 | 2.13463536103804 |
| 16.7199996262789 | 3.09816996372859 |
| 16.7224996262230 | 2.16494946487279 |
| 16.7249996261671 | 3.10379824904841 |
| 16.7274996261112 | 2.19065871479197 |
| 16.7299996260554 | 3.12200954982700 |
| 16.7324996259995 | 2.18622913156055 |
| 16.7349996259436 | 3.13743293663434 |
| 16.7374996258877 | 2.16507126444420 |
| 16.7399996258318 | 3.16744736445864 |
| 16.7424996257760 | 2.15556346015839 |
| 16.7449996257201 | 3.15368038202019 |
| 16.7474996256642 | 2.15961292528545 |
| 16.7499996256083 | 3.14331275982171 |
| 16.7524996255524 | 2.15434554256182 |
| 16.7549996254966 | 3.12338187799459 |
| 16.7574996254407 | 2.13096225192658 |
| 16.7599996253848 | 3.12414683448442 |
| 16.7624996253289 | 2.10964253827538 |
| 16.7649996252730 | 3.10093952488516 |
| 16.7674996252172 | 2.11059257524848 |
| 16.7699996251613 | 3.07767419266969 |
| 16.7724996251054 | 2.12474711548386 |
| 16.7749996250495 | 3.05043442593280 |
| 16.7774996249937 | 2.13456868534161 |
| 16.7799996249378 | 3.03494280915176 |
| 16.7824996248819 | 2.13155551601031 |



|                  |                  |
|------------------|------------------|
| 16.7849996248260 | 3.01683117477992 |
| 16.7874996247701 | 2.12564562325661 |
| 16.7899996247143 | 2.99394118750953 |
| 16.7924996246584 | 2.12097431142435 |
| 16.7949996246025 | 2.98812782773646 |
| 16.7974996245466 | 2.12215635676875 |
| 16.7999996244907 | 2.98849941193452 |
| 16.8024996244349 | 2.12076215407315 |
| 16.8049996243790 | 3.00739553252345 |
| 16.8074996243231 | 2.11259277368474 |
| 16.8099996242672 | 3.01183163228275 |
| 16.8124996242113 | 2.09964483084973 |
| 16.8149996241555 | 3.02962917722648 |
| 16.8174996240996 | 2.10027308969977 |
| 16.8199996240437 | 3.04116832874391 |
| 16.8224996239878 | 2.12235551330167 |
| 16.8249996239319 | 3.06871852370741 |
| 16.8274996238761 | 2.15355283528313 |
| 16.8299996238202 | 3.08376402640053 |
| 16.8324996237643 | 2.16919818837653 |
| 16.8349996237084 | 3.10449022404742 |
| 16.8374996236525 | 2.16223433904977 |
| 16.8399996235967 | 3.12403607627793 |
| 16.8424996235408 | 2.15634227961356 |
| 16.8449996234849 | 3.14289452485476 |
| 16.8474996234290 | 2.16683621668690 |
| 16.8499996233732 | 3.14254501881310 |
| 16.8524996233173 | 2.18146207236637 |
| 16.8549996232614 | 3.13228509866471 |
| 16.8574996232055 | 2.16926415311252 |
| 16.8599996231496 | 3.12872144408623 |
| 16.8624996230938 | 2.13734222892358 |
| 16.8649996230379 | 3.12554794771989 |
| 16.8674996229820 | 2.11172904424621 |
| 16.8699996229261 | 3.12016423179069 |
| 16.8724996228702 | 2.11301387786924 |
| 16.8749996228144 | 3.09844999683100 |
| 16.8774996227585 | 2.12330342423804 |
| 16.8799996227026 | 3.08118215878484 |
| 16.8824996226467 | 2.12903034077723 |
| 16.8849996225908 | 3.06454295565668 |
| 16.8874996225350 | 2.13082168114697 |
| 16.8899996224791 | 3.04233710621719 |
| 16.8924996224232 | 2.14028649755681 |
| 16.8949996223673 | 3.01501870197765 |
| 16.8974996223114 | 2.14992137150385 |
| 16.8999996222556 | 2.99836800461534 |
| 16.9024996221997 | 2.15190133849719 |
| 16.9049996221438 | 2.99760444590576 |
| 16.9074996220879 | 2.14123603521354 |
| 16.9099996220320 | 2.99115831818695 |
| 16.9124996219762 | 2.12239400279048 |

|                  |                  |
|------------------|------------------|
| 16.9149996219203 | 2.98282185311426 |
| 16.9174996218644 | 2.10029703055568 |
| 16.9199996218085 | 2.98348381998914 |
| 16.9224996217526 | 2.08592740620138 |
| 16.9249996216968 | 3.00641216748236 |
| 16.9274996216409 | 2.08643355205624 |
| 16.9299996215850 | 3.02582075797113 |
| 16.9324996215291 | 2.09485469548749 |
| 16.9349996214733 | 3.04623854714203 |
| 16.9374996214174 | 2.10290776700406 |
| 16.9399996213615 | 3.07047863293819 |
| 16.9424996213056 | 2.11651852170705 |
| 16.9449996212497 | 3.11410143550479 |
| 16.9474996211939 | 2.15227023341262 |
| 16.9499996211380 | 3.14113564320995 |
| 16.9524996210821 | 2.19863016128452 |
| 16.9549996210262 | 3.14920903564641 |
| 16.9574996209703 | 2.22877915005906 |
| 16.9599996209145 | 3.15064938068091 |
| 16.9624996208586 | 2.22815743742627 |
| 16.9649996208027 | 3.15698430902325 |
| 16.9674996207468 | 2.21397454491916 |
| 16.9699996206909 | 3.16127833879429 |
| 16.9724996206351 | 2.19571438329602 |
| 16.9749996205792 | 3.14403003416284 |
| 16.9774996205233 | 2.17019683939176 |
| 16.9799996204674 | 3.12719080294551 |
| 16.9824996204115 | 2.12804748761911 |
| 16.9849996203557 | 3.09907096354278 |
| 16.9874996202998 | 2.08637544111457 |
| 16.9899996202439 | 3.08110479068548 |
| 16.9924996201880 | 2.06658778922092 |
| 16.9949996201321 | 3.04299449754415 |
| 16.9974996200763 | 2.07124131695826 |
| 16.9999996200204 | 3.02329440132714 |
| 17.0024996199645 | 2.08239576259485 |
| 17.0049996199086 | 3.00464642654722 |
| 17.0074996198528 | 2.09567811258194 |
| 17.0099996197969 | 3.01458631240341 |
| 17.0124996197410 | 2.12162705362559 |
| 17.0149996196851 | 3.00796493232102 |
| 17.0174996196292 | 2.15899923844567 |
| 17.0199996195734 | 3.00859702329674 |
| 17.0224996195175 | 2.18872589430586 |
| 17.0249996194616 | 3.00417085205985 |
| 17.0274996194057 | 2.19567976802379 |
| 17.0299996193498 | 3.01403216929680 |
| 17.0324996192940 | 2.18006994220897 |
| 17.0349996192381 | 3.02458775134778 |
| 17.0374996191822 | 2.15654487791258 |
| 17.0399996191263 | 3.03039278134271 |
| 17.0424996190704 | 2.13068190625654 |

|                  |                  |
|------------------|------------------|
| 17.0449996190146 | 3.04952983548842 |
| 17.0474996189587 | 2.10442504648895 |
| 17.0499996189028 | 3.06893554524724 |
| 17.0524996188469 | 2.08101518165846 |
| 17.0549996187910 | 3.09770589994677 |
| 17.0574996187352 | 2.07388582876252 |
| 17.0599996186793 | 3.09723185475063 |
| 17.0624996186234 | 2.08854593926516 |
| 17.0649996185675 | 3.11364968937066 |
| 17.0674996185116 | 2.12431022387433 |
| 17.0699996184558 | 3.12120487184420 |
| 17.0724996183999 | 2.16888359609962 |
| 17.0749996183440 | 3.14867768017957 |
| 17.0774996182881 | 2.20450427304530 |
| 17.0799996182323 | 3.14670264999682 |
| 17.0824996181764 | 2.21919099973616 |
| 17.0849996181205 | 3.15443534621301 |
| 17.0874996180646 | 2.21762030127139 |
| 17.0899996180087 | 3.14496006252321 |
| 17.0924996179529 | 2.21604306859682 |
| 17.0949996178970 | 3.13913405626361 |
| 17.0974996178411 | 2.21345579829009 |
| 17.0999996177852 | 3.10662339856153 |
| 17.1024996177293 | 2.19240498587943 |
| 17.1049996176735 | 3.06986658103215 |
| 17.1074996176176 | 2.13566866905941 |
| 17.1099996175617 | 3.04571998529937 |
| 17.1124996175058 | 2.07301361584747 |
| 17.1149996174499 | 3.03288104380785 |
| 17.1174996173941 | 2.04252737146654 |
| 17.1199996173382 | 3.02051942590558 |
| 17.1224996172823 | 2.05584975233333 |
| 17.1249996172264 | 2.99106228716772 |
| 17.1274996171705 | 2.07488672905173 |
| 17.1299996171147 | 2.98995645789082 |
| 17.1324996170588 | 2.08951705603137 |
| 17.1349996170029 | 2.99634406037274 |
| 17.1374996169470 | 2.11464475326637 |
| 17.1399996168911 | 3.01753495364097 |
| 17.1424996168353 | 2.16021319216461 |
| 17.1449996167794 | 3.01701297281417 |
| 17.1474996167235 | 2.19835266229670 |
| 17.1499996166676 | 3.04309477871163 |
| 17.1524996166117 | 2.20921849601550 |
| 17.1549996165559 | 3.06814676856128 |
| 17.1574996165000 | 2.19356863656030 |
| 17.1599996164441 | 3.09908384902587 |
| 17.1624996163882 | 2.17016484146458 |
| 17.1649996163324 | 3.10114802037068 |
| 17.1674996162765 | 2.14753828702540 |
| 17.1699996162206 | 3.11376510759948 |
| 17.1724996161647 | 2.12824034722232 |

|                  |                  |
|------------------|------------------|
| 17.1749996161088 | 3.12786499128943 |
| 17.1774996160530 | 2.11243964151097 |
| 17.1799996159971 | 3.13723691052493 |
| 17.1824996159412 | 2.09950564773591 |
| 17.1849996158853 | 3.13009288221005 |
| 17.1874996158294 | 2.09660993084670 |
| 17.1899996157736 | 3.12452297281057 |
| 17.1924996157177 | 2.11119950698673 |
| 17.1949996156618 | 3.13242583060062 |
| 17.1974996156059 | 2.14659853968575 |
| 17.1999996155500 | 3.12572720528855 |
| 17.2024996154942 | 2.17969425742924 |
| 17.2049996154383 | 3.11196129706412 |
| 17.2074996153824 | 2.19377375282229 |
| 17.2099996153265 | 3.09490405987811 |
| 17.2124996152706 | 2.18747223521831 |
| 17.2149996152148 | 3.09631327183216 |
| 17.2174996151589 | 2.18310434005203 |
| 17.2199996151030 | 3.07858452810736 |
| 17.2224996150471 | 2.17791672206882 |
| 17.2249996149912 | 3.05286110955264 |
| 17.2274996149354 | 2.15976795993713 |
| 17.2299996148795 | 3.02161727023096 |
| 17.2324996148236 | 2.11542778153380 |
| 17.2349996147677 | 3.01597855287882 |
| 17.2374996147119 | 2.07571355879900 |
| 17.2399996146560 | 3.01104146166040 |
| 17.2424996146001 | 2.06131020717237 |
| 17.2449996145442 | 3.00429525751548 |
| 17.2474996144883 | 2.07279079414976 |
| 17.2499996144325 | 3.00141021354196 |
| 17.2524996143766 | 2.08722803401281 |
| 17.2549996143207 | 3.01481187641451 |
| 17.2574996142648 | 2.10780428320563 |
| 17.2599996142089 | 3.03422201153261 |
| 17.2624996141531 | 2.13949802512856 |
| 17.2649996140972 | 3.04374509873445 |
| 17.2674996140413 | 2.17289915840703 |
| 17.2699996139854 | 3.06435485926059 |
| 17.2724996139295 | 2.18955771859844 |
| 17.2749996138737 | 3.09537899168325 |
| 17.2774996138178 | 2.18653233435616 |
| 17.2799996137619 | 3.13576127851244 |
| 17.2824996137060 | 2.18370161095169 |
| 17.2849996136501 | 3.15233222736151 |
| 17.2874996135943 | 2.18569814697753 |
| 17.2899996135384 | 3.15264201522358 |
| 17.2924996134825 | 2.18457828533930 |
| 17.2949996134266 | 3.14700643674254 |
| 17.2974996133707 | 2.16781581946622 |
| 17.2999996133149 | 3.15394998139825 |
| 17.3024996132590 | 2.14879103851398 |

|                  |                  |
|------------------|------------------|
| 17.3049996132031 | 3.15140320764798 |
| 17.3074996131472 | 2.13943480106896 |
| 17.3099996130913 | 3.12917449010358 |
| 17.3124996130355 | 2.14205649960336 |
| 17.3149996129796 | 3.11015102713984 |
| 17.3174996129237 | 2.14373303076316 |
| 17.3199996128678 | 3.09224929459479 |
| 17.3224996128120 | 2.14495998648320 |
| 17.3249996127561 | 3.07968520905189 |
| 17.3274996127002 | 2.14756861944526 |
| 17.3299996126443 | 3.03986690161494 |
| 17.3324996125884 | 2.14964630465084 |
| 17.3349996125326 | 3.01070713649551 |
| 17.3374996124767 | 2.14213785865686 |
| 17.3399996124208 | 2.99572627717170 |
| 17.3424996123649 | 2.13300490089193 |
| 17.3449996123090 | 3.00722652505494 |
| 17.3474996122532 | 2.12294150769422 |
| 17.3499996121973 | 3.00342682201664 |
| 17.3524996121414 | 2.11119839794866 |
| 17.3549996120855 | 2.99915654431809 |
| 17.3574996120296 | 2.09814254628135 |
| 17.3599996119738 | 3.00341320878413 |
| 17.3624996119179 | 2.10410800094125 |
| 17.3649996118620 | 3.01861602648051 |
| 17.3674996118061 | 2.13104743460745 |
| 17.3699996117502 | 3.03160550730088 |
| 17.3724996116944 | 2.15990650030898 |
| 17.3749996116385 | 3.04031882076403 |
| 17.3774996115826 | 2.16616656853230 |
| 17.3799996115267 | 3.06907098425061 |
| 17.3824996114708 | 2.16055780566270 |
| 17.3849996114150 | 3.09513181267277 |
| 17.3874996113591 | 2.16724996293113 |
| 17.3899996113032 | 3.11702880906593 |
| 17.3924996112473 | 2.18726056617084 |
| 17.3949996111915 | 3.10821490936035 |
| 17.3974996111356 | 2.19327608502304 |
| 17.3999996110797 | 3.11809524068685 |
| 17.4024996110238 | 2.16959261729432 |
| 17.4049996109679 | 3.12655141721306 |
| 17.4074996109121 | 2.14038790821757 |
| 17.4099996108562 | 3.14415928392599 |
| 17.4124996108003 | 2.13056040150614 |
| 17.4149996107444 | 3.13384823517572 |
| 17.4174996106885 | 2.13941491950627 |
| 17.4199996106327 | 3.13326726362977 |
| 17.4224996105768 | 2.14455667406576 |
| 17.4249996105209 | 3.12672472821146 |
| 17.4274996104650 | 2.14525066371695 |
| 17.4299996104091 | 3.11819269809516 |
| 17.4324996103533 | 2.15123476665984 |

|                  |                  |
|------------------|------------------|
| 17.4349996102974 | 3.09001901894956 |
| 17.4374996102415 | 2.16897993221168 |
| 17.4399996101856 | 3.06733031713606 |
| 17.4424996101297 | 2.18180797605220 |
| 17.4449996100739 | 3.05877485340471 |
| 17.4474996100180 | 2.18501546386725 |
| 17.4499996099621 | 3.04307389556908 |
| 17.4524996099062 | 2.17062067129082 |
| 17.4549996098503 | 3.02414465793966 |
| 17.4574996097945 | 2.14607027164233 |
| 17.4599996097386 | 2.99429930840773 |
| 17.4624996096827 | 2.11548042033979 |
| 17.4649996096268 | 2.99700491688269 |
| 17.4674996095710 | 2.09842217836569 |
| 17.4699996095151 | 2.99248695790575 |
| 17.4724996094592 | 2.08882342020119 |
| 17.4749996094033 | 3.00462813030981 |
| 17.4774996093474 | 2.07969385135673 |
| 17.4799996092916 | 3.00811045443248 |
| 17.4824996092357 | 2.07179592756188 |
| 17.4849996091798 | 3.04877860378546 |
| 17.4874996091239 | 2.09257913342220 |
| 17.4899996090680 | 3.07561038471537 |
| 17.4924996090122 | 2.14384904596149 |
| 17.4949996089563 | 3.10145436118622 |
| 17.4974996089004 | 2.19832916036930 |
| 17.4999996088445 | 3.11023066078611 |
| 17.5024996087886 | 2.22602022073700 |
| 17.5049996087328 | 3.13407547658476 |
| 17.5074996086769 | 2.22843030156139 |
| 17.5099996086210 | 3.16220404502746 |
| 17.5124996085651 | 2.22764159682724 |
| 17.5149996085092 | 3.17831500302361 |
| 17.5174996084534 | 2.22662140367621 |
| 17.5199996083975 | 3.18223389843566 |
| 17.5224996083416 | 2.21484532930744 |
| 17.5249996082857 | 3.16869559006999 |
| 17.5274996082298 | 2.17748566327909 |
| 17.5299996081740 | 3.16555822797323 |
| 17.5324996081181 | 2.13699884610849 |
| 17.5349996080622 | 3.14105540770805 |
| 17.5374996080063 | 2.10762660918816 |
| 17.5399996079504 | 3.12437382145047 |
| 17.5424996078946 | 2.09592250836833 |
| 17.5449996078387 | 3.09643419978239 |
| 17.5474996077828 | 2.08121681309036 |
| 17.5499996077269 | 3.09611989361749 |
| 17.5524996076711 | 2.07884799671934 |
| 17.5549996076152 | 3.08404776161233 |
| 17.5574996075593 | 2.10041725093706 |
| 17.5599996075034 | 3.07260423473444 |
| 17.5624996074475 | 2.14505383285688 |



|                  |                  |
|------------------|------------------|
| 17.5649996073917 | 3.04354231626652 |
| 17.5674996073358 | 2.18308508014988 |
| 17.5699996072799 | 3.02995990783872 |
| 17.5724996072240 | 2.20312115150960 |
| 17.5749996071681 | 3.02353693476713 |
| 17.5774996071123 | 2.20035408059907 |
| 17.5799996070564 | 3.02009366863629 |
| 17.5824996070005 | 2.18475997182322 |
| 17.5849996069446 | 3.02197484252748 |
| 17.5874996068887 | 2.15931631068957 |
| 17.5899996068329 | 3.02728116482662 |
| 17.5924996067770 | 2.12942340917536 |
| 17.5949996067211 | 3.04355707668330 |
| 17.5974996066652 | 2.10211780975306 |
| 17.5999996066093 | 3.04193846977104 |
| 17.6024996065535 | 2.08038045941722 |
| 17.6049996064976 | 3.04590657114856 |
| 17.6074996064417 | 2.07121296320079 |
| 17.6099996063858 | 3.05388484844550 |
| 17.6124996063299 | 2.08069293032033 |
| 17.6149996062741 | 3.09578827209259 |
| 17.6174996062182 | 2.11438988822260 |
| 17.6199996061623 | 3.12612801120635 |
| 17.6224996061064 | 2.15241094679803 |
| 17.6249996060506 | 3.15305200251915 |
| 17.6274996059947 | 2.18377882072659 |
| 17.6299996059388 | 3.17088538179528 |
| 17.6324996058829 | 2.21233598244503 |
| 17.6349996058270 | 3.19190996638784 |
| 17.6374996057712 | 2.25081942636654 |
| 17.6399996057153 | 3.19199110335320 |
| 17.6424996056594 | 2.27828187674704 |
| 17.6449996056035 | 3.17693948166644 |
| 17.6474996055476 | 2.27199655580087 |
| 17.6499996054918 | 3.16797869093244 |
| 17.6524996054359 | 2.22510877765672 |
| 17.6549996053800 | 3.16805412166680 |
| 17.6574996053241 | 2.17521948448358 |
| 17.6599996052682 | 3.16315783470806 |
| 17.6624996052124 | 2.14379700097654 |
| 17.6649996051565 | 3.12328423540045 |
| 17.6674996051006 | 2.12518104720727 |
| 17.6699996050447 | 3.08346038488400 |
| 17.6724996049888 | 2.09396741233096 |
| 17.6749996049330 | 3.04884328835068 |
| 17.6774996048771 | 2.06310090986311 |
| 17.6799996048212 | 3.03375698285410 |
| 17.6824996047653 | 2.05936216629349 |
| 17.6849996047094 | 3.00616927931945 |
| 17.6874996046536 | 2.08734355230254 |
| 17.6899996045977 | 2.99994328418572 |
| 17.6924996045418 | 2.12046937039208 |

|                  |                  |
|------------------|------------------|
| 17.6949996044859 | 3.00641552930230 |
| 17.6974996044300 | 2.14357425269245 |
| 17.6999996043742 | 3.02266489289981 |
| 17.7024996043183 | 2.16294552040060 |
| 17.7049996042624 | 3.02507689251711 |
| 17.7074996042065 | 2.18336414939904 |
| 17.7099996041507 | 3.02562799369486 |
| 17.7124996040948 | 2.19697182738013 |
| 17.7149996040389 | 3.04133107887484 |
| 17.7174996039830 | 2.19192895774407 |
| 17.7199996039271 | 3.06630692851499 |
| 17.7224996038713 | 2.16922081223028 |
| 17.7249996038154 | 3.09458701115755 |
| 17.7274996037595 | 2.13552704031698 |
| 17.7299996037036 | 3.10525476922297 |
| 17.7324996036477 | 2.10899830097916 |
| 17.7349996035919 | 3.12686137365970 |
| 17.7374996035360 | 2.10518544611276 |
| 17.7399996034801 | 3.13150175435493 |
| 17.7424996034242 | 2.12312758788609 |
| 17.7449996033683 | 3.14452219973385 |
| 17.7474996033125 | 2.13947300476379 |
| 17.7499996032566 | 3.13726478218989 |
| 17.7524996032007 | 2.14370048959714 |
| 17.7549996031448 | 3.14682915933913 |
| 17.7574996030889 | 2.14569922909503 |
| 17.7599996030331 | 3.15168045650221 |
| 17.7624996029772 | 2.16279722728715 |
| 17.7649996029213 | 3.15985494553547 |
| 17.7674996028654 | 2.18565588207476 |
| 17.7699996028095 | 3.14636924944451 |
| 17.7724996027537 | 2.19812200634382 |
| 17.7749996026978 | 3.11946708553833 |
| 17.7774996026419 | 2.18650295891750 |
| 17.7799996025860 | 3.09700574680836 |
| 17.7824996025302 | 2.16701559629759 |
| 17.7849996024743 | 3.07471284525027 |
| 17.7874996024184 | 2.14629334655564 |
| 17.7899996023625 | 3.05943223022410 |
| 17.7924996023066 | 2.12843405314940 |
| 17.7949996022508 | 3.03009973655208 |
| 17.7974996021949 | 2.09972959732081 |
| 17.7999996021390 | 3.02287387688967 |
| 17.8024996020831 | 2.07540902136880 |
| 17.8049996020272 | 3.00684643374899 |
| 17.8074996019714 | 2.07261699878439 |
| 17.8099996019155 | 3.00335869644320 |
| 17.8124996018596 | 2.09370101979461 |
| 17.8149996018037 | 2.98586744882036 |
| 17.8174996017478 | 2.11216209316189 |
| 17.8199996016920 | 3.00317363925664 |
| 17.8224996016361 | 2.11744311412373 |

|                  |                  |
|------------------|------------------|
| 17.8249996015802 | 3.02556466558079 |
| 17.8274996015243 | 2.12624216667646 |
| 17.8299996014684 | 3.05795585863939 |
| 17.8324996014126 | 2.14596818136034 |
| 17.8349996013567 | 3.07284157695593 |
| 17.8374996013008 | 2.16768945678619 |
| 17.8399996012449 | 3.09381764676475 |
| 17.8424996011890 | 2.17243190605252 |
| 17.8449996011332 | 3.11873863464462 |
| 17.8474996010773 | 2.16701942724587 |
| 17.8499996010214 | 3.13255729757191 |
| 17.8524996009655 | 2.15817900808830 |
| 17.8549996009097 | 3.13836310141210 |
| 17.8574996008538 | 2.15543157436486 |
| 17.8599996007979 | 3.14005443908892 |
| 17.8624996007420 | 2.14780021091232 |
| 17.8649996006861 | 3.16129441568308 |
| 17.8674996006303 | 2.14230407012777 |
| 17.8699996005744 | 3.15672462343407 |
| 17.8724996005185 | 2.13748685347957 |
| 17.8749996004626 | 3.14165765614094 |
| 17.8774996004067 | 2.13704682068176 |
| 17.8799996003509 | 3.10526269352449 |
| 17.8824996002950 | 2.13311747532807 |
| 17.8849996002391 | 3.09889665806041 |
| 17.8874996001832 | 2.13548310081138 |
| 17.8899996001273 | 3.08232169195657 |
| 17.8924996000715 | 2.13289266560697 |
| 17.8949996000156 | 3.06935247249872 |
| 17.8974995999597 | 2.12240545311894 |
| 17.8999995999038 | 3.04394567174810 |
| 17.9024995998479 | 2.10678227251536 |
| 17.9049995997921 | 3.03916427532702 |
| 17.9074995997362 | 2.10856181099251 |
| 17.9099995996803 | 3.02432163739061 |
| 17.9124995996244 | 2.12443928176119 |
| 17.9149995995685 | 3.00438169371753 |
| 17.9174995995127 | 2.13233550804253 |
| 17.9199995994568 | 2.99108259790648 |
| 17.9224995994009 | 2.11774969434823 |
| 17.9249995993450 | 2.99750848771676 |
| 17.9274995992891 | 2.10010100016666 |
| 17.9299995992333 | 3.02334260034502 |
| 17.9324995991774 | 2.10730294223066 |
| 17.9349995991215 | 3.03155436823505 |
| 17.9374995990656 | 2.12654623806796 |
| 17.9399995990098 | 3.04498237814146 |
| 17.9424995989539 | 2.13635450481913 |
| 17.9449995988980 | 3.05016999333283 |
| 17.9474995988421 | 2.12563261463147 |
| 17.9499995987862 | 3.07670038722005 |
| 17.9524995987304 | 2.12125968048280 |

|                  |                  |
|------------------|------------------|
| 17.9549995986745 | 3.08479456278664 |
| 17.9574995986186 | 2.12809862107798 |
| 17.9599995985627 | 3.10756780611815 |
| 17.9624995985068 | 2.14510763018572 |
| 17.9649995984510 | 3.12175567756767 |
| 17.9674995983951 | 2.14658377686826 |
| 17.9699995983392 | 3.14773502123098 |
| 17.9724995982833 | 2.13883279461977 |
| 17.9749995982274 | 3.15172264648240 |
| 17.9774995981716 | 2.13719468386879 |
| 17.9799995981157 | 3.14623153891684 |
| 17.9824995980598 | 2.15641549268827 |
| 17.9849995980039 | 3.13202748834313 |
| 17.9874995979480 | 2.17500678039886 |
| 17.9899995978922 | 3.11981362899421 |
| 17.9924995978363 | 2.17704295902791 |
| 17.9949995977804 | 3.11410060536425 |
| 17.9974995977245 | 2.15659465337137 |
| 17.9999995976686 | 3.09284259384939 |
| 18.0024995976128 | 2.13008737449101 |
| 18.0049995975569 | 3.07836578037016 |
| 18.0074995975010 | 2.11343376368175 |
| 18.0099995974451 | 3.04894155502151 |
| 18.0124995973893 | 2.11328104212525 |
| 18.0149995973334 | 3.03004036960995 |
| 18.0174995972775 | 2.11448499709622 |
| 18.0199995972216 | 2.99536558453655 |
| 18.0224995971657 | 2.09827117070721 |
| 18.0249995971099 | 2.98185088346969 |
| 18.0274995970540 | 2.07297264974746 |
| 18.0299995969981 | 2.98177249405383 |
| 18.0324995969422 | 2.06607829735201 |
| 18.0349995968863 | 3.00618778071198 |
| 18.0374995968305 | 2.09252788165080 |
| 18.0399995967746 | 3.01495505181006 |
| 18.0424995967187 | 2.12633107442773 |
| 18.0449995966628 | 3.02361122620832 |
| 18.0474995966069 | 2.14324419249347 |
| 18.0499995965511 | 3.03903804161679 |
| 18.0524995964952 | 2.14785277809351 |
| 18.0549995964393 | 3.06683001533978 |
| 18.0574995963834 | 2.16151172764688 |
| 18.0599995963275 | 3.09014437323906 |
| 18.0624995962717 | 2.17530906846039 |
| 18.0649995962158 | 3.10066494925798 |
| 18.0674995961599 | 2.17098197821585 |
| 18.0699995961040 | 3.12415103633259 |
| 18.0724995960481 | 2.14268964156058 |
| 18.0749995959923 | 3.14301317855891 |
| 18.0774995959364 | 2.12228156666263 |
| 18.0799995958805 | 3.15294160656426 |
| 18.0824995958246 | 2.12328466698651 |

|                  |                  |
|------------------|------------------|
| 18.0849995957687 | 3.12926114311765 |
| 18.0874995957129 | 2.13240713031658 |
| 18.0899995956570 | 3.12238080806362 |
| 18.0924995956011 | 2.12322833018825 |
| 18.0949995955452 | 3.12029807888942 |
| 18.0974995954894 | 2.11083547502357 |
| 18.0999995954335 | 3.12567024935661 |
| 18.1024995953776 | 2.11288372332554 |
| 18.1049995953217 | 3.10579715432254 |
| 18.1074995952658 | 2.13295492630623 |
| 18.1099995952100 | 3.08916618170923 |
| 18.1124995951541 | 2.15270472316177 |
| 18.1149995950982 | 3.07185262097484 |
| 18.1174995950423 | 2.16648042373085 |
| 18.1199995949864 | 3.05267341064550 |
| 18.1224995949306 | 2.16751745915990 |
| 18.1249995948747 | 3.02252298538192 |
| 18.1274995948188 | 2.15501008355437 |
| 18.1299995947629 | 2.99866147776804 |
| 18.1324995947070 | 2.12706730066470 |
| 18.1349995946512 | 3.00034840491134 |
| 18.1374995945953 | 2.09668613034498 |
| 18.1399995945394 | 3.00201348542707 |
| 18.1424995944835 | 2.07575740095176 |
| 18.1449995944276 | 3.00216533018436 |
| 18.1474995943718 | 2.06677292089431 |
| 18.1499995943159 | 2.99003569287559 |
| 18.1524995942600 | 2.06715506797023 |
| 18.1549995942041 | 3.00548612227606 |
| 18.1574995941482 | 2.07887723607937 |
| 18.1599995940924 | 3.02575180550702 |
| 18.1624995940365 | 2.10282434901515 |
| 18.1649995939806 | 3.06603769307228 |
| 18.1674995939247 | 2.12932784691273 |
| 18.1699995938689 | 3.09296771900953 |
| 18.1724995938130 | 2.15634030512116 |
| 18.1749995937571 | 3.12757910452302 |
| 18.1774995937012 | 2.18212868665118 |
| 18.1799995936453 | 3.14698234155659 |
| 18.1824995935895 | 2.20883405685171 |
| 18.1849995935336 | 3.15931609541622 |
| 18.1874995934777 | 2.22050056942618 |
| 18.1899995934218 | 3.15774389834420 |
| 18.1924995933659 | 2.20820963256526 |
| 18.1949995933101 | 3.15288533877479 |
| 18.1974995932542 | 2.17036571856151 |
| 18.1999995931983 | 3.15351739568327 |
| 18.2024995931424 | 2.13818204146162 |
| 18.2049995930865 | 3.14189172419834 |
| 18.2074995930307 | 2.11652285910146 |
| 18.2099995929748 | 3.12513331798821 |
| 18.2124995929189 | 2.10087923414389 |

|                  |                  |
|------------------|------------------|
| 18.2149995928630 | 3.08788228605318 |
| 18.2174995928071 | 2.07726760248650 |
| 18.2199995927513 | 3.06628880778083 |
| 18.2224995926954 | 2.06810442654935 |
| 18.2249995926395 | 3.03728928538030 |
| 18.2274995925836 | 2.08156327695148 |
| 18.2299995925277 | 3.02608947851546 |
| 18.2324995924719 | 2.11363295172648 |
| 18.2349995924160 | 3.01009445667225 |
| 18.2374995923601 | 2.13652649360100 |
| 18.2399995923042 | 3.01891825405691 |
| 18.2424995922484 | 2.14565006200242 |
| 18.2449995921925 | 3.01877236201788 |
| 18.2474995921366 | 2.15187996754536 |
| 18.2499995920807 | 3.01491574949566 |
| 18.2524995920248 | 2.16171129092485 |
| 18.2549995919690 | 3.00262801810581 |
| 18.2574995919131 | 2.16446506775369 |
| 18.2599995918572 | 3.00678549450372 |
| 18.2624995918013 | 2.14217034870386 |
| 18.2649995917454 | 3.03016336722412 |
| 18.2674995916896 | 2.10364138539557 |
| 18.2699995916337 | 3.04802379977995 |
| 18.2724995915778 | 2.06808857398831 |
| 18.2749995915219 | 3.06928523997559 |
| 18.2774995914660 | 2.06352320624557 |
| 18.2799995914102 | 3.08061290832993 |
| 18.2824995913543 | 2.08586931674782 |
| 18.2849995912984 | 3.10649183956855 |
| 18.2874995912425 | 2.12368362297236 |
| 18.2899995911866 | 3.11500439722675 |
| 18.2924995911308 | 2.14763501650537 |
| 18.2949995910749 | 3.12849998918028 |
| 18.2974995910190 | 2.16068515975535 |
| 18.2999995909631 | 3.14098278767060 |
| 18.3024995909072 | 2.17194155751622 |
| 18.3049995908514 | 3.17317228046840 |
| 18.3074995907955 | 2.19916102208115 |
| 18.3099995907396 | 3.17092891162353 |
| 18.3124995906837 | 2.21755949770553 |
| 18.3149995906278 | 3.15480166221127 |
| 18.3174995905720 | 2.20595256575068 |
| 18.3199995905161 | 3.12382094031476 |
| 18.3224995904602 | 2.16683221774507 |
| 18.3249995904043 | 3.10566671714626 |
| 18.3274995903485 | 2.13581124791448 |
| 18.3299995902926 | 3.07926697805095 |
| 18.3324995902367 | 2.11284169388291 |
| 18.3349995901808 | 3.04754463129336 |
| 18.3374995901249 | 2.08398469537326 |
| 18.3399995900691 | 3.02853411426419 |
| 18.3424995900132 | 2.04659752745160 |



|                  |                  |
|------------------|------------------|
| 18.3449995899573 | 3.01785581913533 |
| 18.3474995899014 | 2.03464392011993 |
| 18.3499995898455 | 3.01149099371624 |
| 18.3524995897897 | 2.06588513740455 |
| 18.3549995897338 | 2.98640145612843 |
| 18.3574995896779 | 2.11689557812779 |
| 18.3599995896220 | 2.98752927784298 |
| 18.3624995895661 | 2.15655718927461 |
| 18.3649995895103 | 2.99756264173762 |
| 18.3674995894544 | 2.16927483863548 |
| 18.3699995893985 | 3.03030151581934 |
| 18.3724995893426 | 2.17059272762142 |
| 18.3749995892867 | 3.04798079146408 |
| 18.3774995892309 | 2.16720044271729 |
| 18.3799995891750 | 3.07809238459683 |
| 18.3824995891191 | 2.16812797979409 |
| 18.3849995890632 | 3.08599675110555 |
| 18.3874995890073 | 2.15815885578981 |
| 18.3899995889515 | 3.09817602958999 |
| 18.3924995888956 | 2.13660635435730 |
| 18.3949995888397 | 3.09402113681743 |
| 18.3974995887838 | 2.10337904831179 |
| 18.3999995887280 | 3.10111662255130 |
| 18.4024995886721 | 2.08221671003645 |
| 18.4049995886162 | 3.11872957028483 |
| 18.4074995885603 | 2.07899520295887 |
| 18.4099995885044 | 3.13618441257573 |
| 18.4124995884486 | 2.09680442151050 |
| 18.4149995883927 | 3.14501639363629 |
| 18.4174995883368 | 2.12087030473506 |
| 18.4199995882809 | 3.13682209956096 |
| 18.4224995882250 | 2.14832158746776 |
| 18.4249995881692 | 3.13439777487494 |
| 18.4274995881133 | 2.17832513382667 |
| 18.4299995880574 | 3.11696731900448 |
| 18.4324995880015 | 2.20682720059478 |
| 18.4349995879456 | 3.10867452983985 |
| 18.4374995878898 | 2.21184155197066 |
| 18.4399995878339 | 3.08769965189816 |
| 18.4424995877780 | 2.18714033195449 |
| 18.4449995877221 | 3.08376426495703 |
| 18.4474995876662 | 2.14893028664264 |
| 18.4499995876104 | 3.06400722555202 |
| 18.4524995875545 | 2.11882410535514 |
| 18.4549995874986 | 3.04130732017762 |
| 18.4574995874427 | 2.09894494648835 |
| 18.4599995873868 | 3.00013669869541 |
| 18.4624995873310 | 2.07432801740202 |
| 18.4649995872751 | 2.98018318446132 |
| 18.4674995872192 | 2.04475802036940 |
| 18.4699995871633 | 2.97580491837671 |
| 18.4724995871074 | 2.03463197286905 |

|                  |                  |
|------------------|------------------|
| 18.4749995870516 | 2.98826964012771 |
| 18.4774995869957 | 2.06099306941945 |
| 18.4799995869398 | 3.00854262112489 |
| 18.4824995868839 | 2.10406714749055 |
| 18.4849995868281 | 3.03231271562878 |
| 18.4874995867722 | 2.14306981470810 |
| 18.4899995867163 | 3.06413330170213 |
| 18.4924995866604 | 2.17379687941008 |
| 18.4949995866045 | 3.08420637142864 |
| 18.4974995865487 | 2.20274912428833 |
| 18.4999995864928 | 3.10285494419897 |
| 18.5024995864369 | 2.21843522460021 |
| 18.5049995863810 | 3.11468590051292 |
| 18.5074995863251 | 2.21370678176605 |
| 18.5099995862693 | 3.14737426499058 |
| 18.5124995862134 | 2.18307014496328 |
| 18.5149995861575 | 3.16418716880197 |
| 18.5174995861016 | 2.14420168807251 |
| 18.5199995860457 | 3.16537753079107 |
| 18.5224995859899 | 2.11138424763116 |
| 18.5249995859340 | 3.14411073355249 |
| 18.5274995858781 | 2.09770833772620 |
| 18.5299995858222 | 3.13190198698906 |
| 18.5324995857663 | 2.09607414453044 |
| 18.5349995857105 | 3.11693520040857 |
| 18.5374995856546 | 2.09819737745213 |
| 18.5399995855987 | 3.09670734185522 |
| 18.5424995855428 | 2.09327826678657 |
| 18.5449995854869 | 3.08088980934113 |
| 18.5474995854311 | 2.09905391253703 |
| 18.5499995853752 | 3.07595005431623 |
| 18.5524995853193 | 2.12428587592490 |
| 18.5549995852634 | 3.06957984413975 |
| 18.5574995852076 | 2.16217003145914 |
| 18.5599995851517 | 3.04171000893001 |
| 18.5624995850958 | 2.18028643276084 |
| 18.5649995850399 | 3.01603503808079 |
| 18.5674995849840 | 2.16887737620433 |
| 18.5699995849282 | 3.00376743567374 |
| 18.5724995848723 | 2.14334275774408 |
| 18.5749995848164 | 3.00986528892275 |
| 18.5774995847605 | 2.12460058302684 |
| 18.5799995847046 | 3.00352850625493 |
| 18.5824995846488 | 2.10934683098252 |
| 18.5849995845929 | 3.00349607286675 |
| 18.5874995845370 | 2.08096048725150 |
| 18.5899995844811 | 3.01222841261067 |
| 18.5924995844252 | 2.05474761084008 |
| 18.5949995843694 | 3.02982657552904 |
| 18.5974995843135 | 2.06015653622583 |
| 18.5999995842576 | 3.03487859949241 |
| 18.6024995842017 | 2.09709352899698 |

|                  |                  |
|------------------|------------------|
| 18.6049995841458 | 3.04840038329187 |
| 18.6074995840900 | 2.12828955849833 |
| 18.6099995840341 | 3.08384271659629 |
| 18.6124995839782 | 2.14356853888883 |
| 18.6149995839223 | 3.12532879234841 |
| 18.6174995838664 | 2.15606695631397 |
| 18.6199995838106 | 3.15267073061000 |
| 18.6224995837547 | 2.18168528052054 |
| 18.6249995836988 | 3.15493749778042 |
| 18.6274995836429 | 2.20289881580294 |
| 18.6299995835871 | 3.16405420594733 |
| 18.6324995835312 | 2.20939162483929 |
| 18.6349995834753 | 3.16502365382409 |
| 18.6374995834194 | 2.19269814774652 |
| 18.6399995833635 | 3.16091413490133 |
| 18.6424995833077 | 2.16432548011107 |
| 18.6449995832518 | 3.13257451290612 |
| 18.6474995831959 | 2.12687228570147 |
| 18.6499995831400 | 3.12115503063289 |
| 18.6524995830841 | 2.10104457393221 |
| 18.6549995830283 | 3.10248991930417 |
| 18.6574995829724 | 2.09008812501148 |
| 18.6599995829165 | 3.08015210605986 |
| 18.6624995828606 | 2.09234979404520 |
| 18.6649995828047 | 3.03639423655114 |
| 18.6674995827489 | 2.09067394793736 |
| 18.6699995826930 | 3.00340139043319 |
| 18.6724995826371 | 2.09031595333026 |
| 18.6749995825812 | 2.99325097572673 |
| 18.6774995825253 | 2.09937165644771 |
| 18.6799995824695 | 2.99499753808163 |
| 18.6824995824136 | 2.11911684339562 |
| 18.6849995823577 | 2.99874345447789 |
| 18.6874995823018 | 2.13540400659782 |
| 18.6899995822459 | 2.99133447804521 |
| 18.6924995821901 | 2.13477168392454 |
| 18.6949995821342 | 3.00837626091036 |
| 18.6974995820783 | 2.13037551691011 |
| 18.6999995820224 | 3.01939036725843 |
| 18.7024995819665 | 2.13116090889191 |
| 18.7049995819107 | 3.04156087676311 |
| 18.7074995818548 | 2.13505172809958 |
| 18.7099995817989 | 3.04615497784519 |
| 18.7124995817430 | 2.11972911794904 |
| 18.7149995816872 | 3.07893894345341 |
| 18.7174995816313 | 2.10148943578239 |
| 18.7199995815754 | 3.10333166339420 |
| 18.7224995815195 | 2.10243548423299 |
| 18.7249995814636 | 3.12851219262719 |
| 18.7274995814078 | 2.13032378020455 |
| 18.7299995813519 | 3.12538519405561 |
| 18.7324995812960 | 2.15299058210876 |

|                  |                  |
|------------------|------------------|
| 18.7349995812401 | 3.13278311192508 |
| 18.7374995811842 | 2.15662965177566 |
| 18.7399995811284 | 3.14367207817912 |
| 18.7424995810725 | 2.15143441235144 |
| 18.7449995810166 | 3.14854192294529 |
| 18.7474995809607 | 2.15704705982531 |
| 18.7499995809048 | 3.14422407181899 |
| 18.7524995808490 | 2.16329842799023 |
| 18.7549995807931 | 3.13068346019555 |
| 18.7574995807372 | 2.15886475720134 |
| 18.7599995806813 | 3.12509964682808 |
| 18.7624995806254 | 2.14341572127714 |
| 18.7649995805696 | 3.09393222126811 |
| 18.7674995805137 | 2.12820797487863 |
| 18.7699995804578 | 3.06461061822314 |
| 18.7724995804019 | 2.11433852008637 |
| 18.7749995803460 | 3.02969094795063 |
| 18.7774995802902 | 2.10314474684007 |
| 18.7799995802343 | 3.02726814196100 |
| 18.7824995801784 | 2.09445717945271 |
| 18.7849995801225 | 3.00953680094363 |
| 18.7874995800667 | 2.08970280550896 |
| 18.7899995800108 | 2.99758870375107 |
| 18.7924995799549 | 2.08845029495509 |
| 18.7949995798990 | 2.97866656688274 |
| 18.7974995798431 | 2.09529514578185 |
| 18.7999995797873 | 2.98993985383352 |
| 18.8024995797314 | 2.11362956603800 |
| 18.8049995796755 | 2.99777982201562 |
| 18.8074995796196 | 2.13077690480867 |
| 18.8099995795637 | 3.00890480808117 |
| 18.8124995795079 | 2.12967594934276 |
| 18.8149995794520 | 3.02737518588149 |
| 18.8174995793961 | 2.11589570891502 |
| 18.8199995793402 | 3.06879494474867 |
| 18.8224995792843 | 2.12029326784693 |
| 18.8249995792285 | 3.09985415981768 |
| 18.8274995791726 | 2.14470498731247 |
| 18.8299995791167 | 3.10429941659773 |
| 18.8324995790608 | 2.16059640690482 |
| 18.8349995790049 | 3.11169929143338 |
| 18.8374995789491 | 2.14569188535563 |
| 18.8399995788932 | 3.13065046522045 |
| 18.8424995788373 | 2.13218376018438 |
| 18.8449995787814 | 3.15744380887546 |
| 18.8474995787255 | 2.14290926097794 |
| 18.8499995786697 | 3.14747094720110 |
| 18.8524995786138 | 2.16429593392216 |
| 18.8549995785579 | 3.13741769659891 |
| 18.8574995785020 | 2.15917939181000 |
| 18.8599995784461 | 3.12722366480461 |
| 18.8624995783903 | 2.13359382311934 |

|                  |                  |
|------------------|------------------|
| 18.8649995783344 | 3.13039109963020 |
| 18.8674995782785 | 2.12013656678078 |
| 18.8699995782226 | 3.10010204192394 |
| 18.8724995781668 | 2.12992648095985 |
| 18.8749995781109 | 3.06893185253909 |
| 18.8774995780550 | 2.13451800305596 |
| 18.8799995779991 | 3.04761749263978 |
| 18.8824995779432 | 2.11733832385592 |
| 18.8849995778874 | 3.04813280871717 |
| 18.8874995778315 | 2.09487042191444 |
| 18.8899995777756 | 3.03378242264619 |
| 18.8924995777197 | 2.09299148642559 |
| 18.8949995776638 | 3.00817677081999 |
| 18.8974995776080 | 2.10754729666335 |
| 18.8999995775521 | 2.99323476432989 |
| 18.9024995774962 | 2.12320522283881 |
| 18.9049995774403 | 2.99604000703946 |
| 18.9074995773844 | 2.12801932445220 |
| 18.9099995773286 | 3.00833056855842 |
| 18.9124995772727 | 2.12502027000709 |
| 18.9149995772168 | 3.00661952679833 |
| 18.9174995771609 | 2.11705900671332 |
| 18.9199995771050 | 3.01954691852304 |
| 18.9224995770492 | 2.11341387328985 |
| 18.9249995769933 | 3.03775443335517 |
| 18.9274995769374 | 2.12009251827485 |
| 18.9299995768815 | 3.06611245464693 |
| 18.9324995768256 | 2.12992945678724 |
| 18.9349995767698 | 3.07398706630883 |
| 18.9374995767139 | 2.12687401791949 |
| 18.9399995766580 | 3.08538697634008 |
| 18.9424995766021 | 2.11178136608741 |
| 18.9449995765463 | 3.10769596364381 |
| 18.9474995764904 | 2.11190692702141 |
| 18.9499995764345 | 3.13792787699431 |
| 18.9524995763786 | 2.13579355448672 |
| 18.9549995763227 | 3.15167230340481 |
| 18.9574995762669 | 2.16417214668219 |
| 18.9599995762110 | 3.14467929883112 |
| 18.9624995761551 | 2.16711222111385 |
| 18.9649995760992 | 3.14527368622080 |
| 18.9674995760433 | 2.16087550160161 |
| 18.9699995759875 | 3.14494542680489 |
| 18.9724995759316 | 2.16583887318932 |
| 18.9749995758757 | 3.13731149144757 |
| 18.9774995758198 | 2.18084778254467 |
| 18.9799995757639 | 3.10238195921231 |
| 18.9824995757081 | 2.17021357685321 |
| 18.9849995756522 | 3.08145458776501 |
| 18.9874995755963 | 2.13084656808744 |
| 18.9899995755404 | 3.06614668291065 |
| 18.9924995754845 | 2.09377649634578 |

|                  |                  |
|------------------|------------------|
| 18.9949995754287 | 3.04937902509708 |
| 18.9974995753728 | 2.08608340125557 |
| 18.9999995753169 | 3.01067737930354 |
| 19.0024995752610 | 2.08959383438289 |
| 19.0049995752051 | 2.98762017408857 |
| 19.0074995751493 | 2.08119042185692 |
| 19.0099995750934 | 2.98970395867567 |
| 19.0124995750375 | 2.06956978381933 |
| 19.0149995749816 | 2.99743492056091 |
| 19.0174995749258 | 2.07997386091749 |
| 19.0199995748699 | 3.00134360942045 |
| 19.0224995748140 | 2.11090988108659 |
| 19.0249995747581 | 3.01192123877451 |
| 19.0274995747022 | 2.14275904798160 |
| 19.0299995746464 | 3.04494441649203 |
| 19.0324995745905 | 2.16602437364380 |
| 19.0349995745346 | 3.06309819431585 |
| 19.0374995744787 | 2.17699002357521 |
| 19.0399995744228 | 3.07307931234747 |
| 19.0424995743670 | 2.17347005362094 |
| 19.0449995743111 | 3.08075293382543 |
| 19.0474995742552 | 2.15758856505243 |
| 19.0499995741993 | 3.11757242419290 |
| 19.0524995741434 | 2.14398585214875 |
| 19.0549995740876 | 3.13410310857907 |
| 19.0574995740317 | 2.13281338228969 |
| 19.0599995739758 | 3.13714848019424 |
| 19.0624995739199 | 2.11675756326699 |
| 19.0649995738640 | 3.12309965650618 |
| 19.0674995738082 | 2.09812609131506 |
| 19.0699995737523 | 3.13391562289000 |
| 19.0724995736964 | 2.10169865479069 |
| 19.0749995736405 | 3.13202145219761 |
| 19.0774995735846 | 2.12452167821230 |
| 19.0799995735288 | 3.12281975892446 |
| 19.0824995734729 | 2.14326326203525 |
| 19.0849995734170 | 3.10580591616250 |
| 19.0874995733611 | 2.14295660048308 |
| 19.0899995733052 | 3.10818183335033 |
| 19.0924995732494 | 2.14854948412039 |
| 19.0949995731935 | 3.10470278858975 |
| 19.0974995731376 | 2.16795183162680 |
| 19.0999995730817 | 3.07244365867708 |
| 19.1024995730259 | 2.18228954537087 |
| 19.1049995729700 | 3.03892406094690 |
| 19.1074995729141 | 2.16489410334386 |
| 19.1099995728582 | 3.01097324561893 |
| 19.1124995728023 | 2.12664916894654 |
| 19.1149995727465 | 3.01070047578317 |
| 19.1174995726906 | 2.09422588680352 |
| 19.1199995726347 | 2.99169438794958 |
| 19.1224995725788 | 2.07594225080998 |



|                  |                  |
|------------------|------------------|
| 19.1249995725229 | 2.98990097974849 |
| 19.1274995724671 | 2.06270348833394 |
| 19.1299995724112 | 2.98504118182262 |
| 19.1324995723553 | 2.05255138498528 |
| 19.1349995722994 | 3.01151622881332 |
| 19.1374995722435 | 2.06663628526187 |
| 19.1399995721877 | 3.01629381154075 |
| 19.1424995721318 | 2.10500255579631 |
| 19.1449995720759 | 3.03467113835305 |
| 19.1474995720200 | 2.14807478717548 |
| 19.1499995719641 | 3.06205172389152 |
| 19.1524995719083 | 2.17444592950526 |
| 19.1549995718524 | 3.11273541470280 |
| 19.1574995717965 | 2.18857994101129 |
| 19.1599995717406 | 3.14400833774483 |
| 19.1624995716847 | 2.19804749459355 |
| 19.1649995716289 | 3.15277127480031 |
| 19.1674995715730 | 2.20198983075967 |
| 19.1699995715171 | 3.15706268072302 |
| 19.1724995714612 | 2.19490472765107 |
| 19.1749995714054 | 3.15673610155680 |
| 19.1774995713495 | 2.17596789872392 |
| 19.1799995712936 | 3.16093219596403 |
| 19.1824995712377 | 2.14642269714192 |
| 19.1849995711818 | 3.13385614106982 |
| 19.1874995711260 | 2.10686694239124 |
| 19.1899995710701 | 3.12148357992301 |
| 19.1924995710142 | 2.07280756879190 |
| 19.1949995709583 | 3.10555408423312 |
| 19.1974995709024 | 2.06755502122434 |
| 19.1999995708466 | 3.09981371578003 |
| 19.2024995707907 | 2.09275264646016 |
| 19.2049995707348 | 3.06281935244066 |
| 19.2074995706789 | 2.11927645193118 |
| 19.2099995706230 | 3.03566943150370 |
| 19.2124995705672 | 2.13020189820989 |
| 19.2149995705113 | 3.02238086341794 |
| 19.2174995704554 | 2.14193912809631 |
| 19.2199995703995 | 3.02774959083525 |
| 19.2224995703436 | 2.16230038745915 |
| 19.2249995702878 | 3.01777423732674 |
| 19.2274995702319 | 2.17445714470233 |
| 19.2299995701760 | 3.00235139550919 |
| 19.2324995701201 | 2.15579693296029 |
| 19.2349995700642 | 2.99931848655924 |
| 19.2374995700084 | 2.11928122155178 |
| 19.2399995699525 | 3.00701466865644 |
| 19.2424995698966 | 2.09517373939466 |
| 19.2449995698407 | 3.01361440258869 |
| 19.2474995697848 | 2.08989568214923 |
| 19.2499995697290 | 3.00812112768269 |
| 19.2524995696731 | 2.07971619579427 |

|                  |                  |
|------------------|------------------|
| 19.2549995696172 | 3.03402572641581 |
| 19.2574995695613 | 2.05999713859656 |
| 19.2599995695055 | 3.07105675831789 |
| 19.2624995694496 | 2.06575962437889 |
| 19.2649995693937 | 3.10502606040803 |
| 19.2674995693378 | 2.11233822641924 |
| 19.2699995692819 | 3.10905791695587 |
| 19.2724995692261 | 2.16959308836542 |
| 19.2749995691702 | 3.12895376339504 |
| 19.2774995691143 | 2.20399677055979 |
| 19.2799995690584 | 3.15816943999431 |
| 19.2824995690025 | 2.21627025112417 |
| 19.2849995689467 | 3.17912074509698 |
| 19.2874995688908 | 2.21847038720353 |
| 19.2899995688349 | 3.17509520557290 |
| 19.2924995687790 | 2.21355403692456 |
| 19.2949995687231 | 3.16675529847366 |
| 19.2974995686673 | 2.19678076859504 |
| 19.2999995686114 | 3.15865101858198 |
| 19.3024995685555 | 2.16896324502653 |
| 19.3049995684996 | 3.13295161155563 |
| 19.3074995684437 | 2.12974062809559 |
| 19.3099995683879 | 3.08862300093812 |
| 19.3124995683320 | 2.08389699473510 |
| 19.3149995682761 | 3.04715829606061 |
| 19.3174995682202 | 2.04741983704320 |
| 19.3199995681643 | 3.03652197886151 |
| 19.3224995681085 | 2.04211744535935 |
| 19.3249995680526 | 3.02120854386419 |
| 19.3274995679967 | 2.06249207788200 |
| 19.3299995679408 | 3.00571925608664 |
| 19.3324995678850 | 2.08910105249244 |
| 19.3349995678291 | 2.99156303773730 |
| 19.3374995677732 | 2.11666869673386 |
| 19.3399995677173 | 2.99901611604656 |
| 19.3424995676614 | 2.15295188023630 |
| 19.3449995676056 | 3.00272908307326 |
| 19.3474995675497 | 2.18707987524141 |
| 19.3499995674938 | 3.00943574445775 |
| 19.3524995674379 | 2.19514407086984 |
| 19.3549995673820 | 3.02645100485734 |
| 19.3574995673262 | 2.17046275354382 |
| 19.3599995672703 | 3.05551092059937 |
| 19.3624995672144 | 2.13731859327032 |
| 19.3649995671585 | 3.07881949323243 |
| 19.3674995671026 | 2.11840472131224 |
| 19.3699995670468 | 3.08087473240539 |
| 19.3724995669909 | 2.10807896467424 |
| 19.3749995669350 | 3.08669695533284 |
| 19.3774995668791 | 2.08918916950596 |
| 19.3799995668232 | 3.09764188803693 |
| 19.3824995667674 | 2.06856478202086 |

|                  |                  |
|------------------|------------------|
| 19.3849995667115 | 3.12090676937729 |
| 19.3874995666556 | 2.07558905174049 |
| 19.3899995665997 | 3.12510538926946 |
| 19.3924995665438 | 2.11087046020380 |
| 19.3949995664880 | 3.13928177246532 |
| 19.3974995664321 | 2.15332334748639 |
| 19.3999995663762 | 3.14369108661697 |
| 19.4024995663203 | 2.18171620229030 |
| 19.4049995662645 | 3.15558088298018 |
| 19.4074995662086 | 2.20113984192213 |
| 19.4099995661527 | 3.14007175570718 |
| 19.4124995660968 | 2.21238110009510 |
| 19.4149995660409 | 3.12047805437004 |
| 19.4174995659851 | 2.21020493559149 |
| 19.4199995659292 | 3.10215751076972 |
| 19.4224995658733 | 2.18573452853017 |
| 19.4249995658174 | 3.09212925416063 |
| 19.4274995657615 | 2.14433018297020 |
| 19.4299995657057 | 3.07382792004839 |
| 19.4324995656498 | 2.09839126662522 |
| 19.4349995655939 | 3.03203558528227 |
| 19.4374995655380 | 2.05938059361620 |
| 19.4399995654821 | 3.00490739745903 |
| 19.4424995654263 | 2.04063936443410 |
| 19.4449995653704 | 2.98749596904782 |
| 19.4474995653145 | 2.04675793028414 |
| 19.4499995652586 | 2.99442123534983 |
| 19.4524995652027 | 2.06856913647913 |
| 19.4549995651469 | 2.98412493348888 |
| 19.4574995650910 | 2.08792357234766 |
| 19.4599995650351 | 3.00268829808657 |
| 19.4624995649792 | 2.11041760275852 |
| 19.4649995649233 | 3.02704985080937 |
| 19.4674995648675 | 2.14693700277465 |
| 19.4699995648116 | 3.06594201559097 |
| 19.4724995647557 | 2.19060226452499 |
| 19.4749995646998 | 3.07269149143516 |
| 19.4774995646439 | 2.20949025496674 |
| 19.4799995645881 | 3.08559381929557 |
| 19.4824995645322 | 2.18805067428933 |
| 19.4849995644763 | 3.10770849293189 |
| 19.4874995644204 | 2.15402161498742 |
| 19.4899995643646 | 3.13920959151520 |
| 19.4924995643087 | 2.13833889298610 |
| 19.4949995642528 | 3.14411180821452 |
| 19.4974995641969 | 2.13447699321707 |
| 19.4999995641410 | 3.12964825517373 |
| 19.5024995640852 | 2.11055919660004 |
| 19.5049995640293 | 3.12739249846801 |
| 19.5074995639734 | 2.07450337609318 |
| 19.5099995639175 | 3.12796465187924 |
| 19.5124995638616 | 2.07053493000939 |

|                  |                  |
|------------------|------------------|
| 19.5149995638058 | 3.12220489201365 |
| 19.5174995637499 | 2.10510811739326 |
| 19.5199995636940 | 3.09339597075593 |
| 19.5224995636381 | 2.13811985421678 |
| 19.5249995635822 | 3.09215154651854 |
| 19.5274995635264 | 2.14368437738231 |
| 19.5299995634705 | 3.09427266006925 |
| 19.5324995634146 | 2.14480008116188 |
| 19.5349995633587 | 3.09708296524859 |
| 19.5374995633028 | 2.16082609007042 |
| 19.5399995632470 | 3.06306760448753 |
| 19.5424995631911 | 2.17880442728805 |
| 19.5449995631352 | 3.04417834110044 |
| 19.5474995630793 | 2.17627943757115 |
| 19.5499995630234 | 3.02696060387627 |
| 19.5524995629676 | 2.14846382483904 |
| 19.5549995629117 | 3.02239729859908 |
| 19.5574995628558 | 2.10791506628374 |
| 19.5599995627999 | 2.99995202590491 |
| 19.5624995627441 | 2.07172434801182 |
| 19.5649995626882 | 2.99763589946311 |
| 19.5674995626323 | 2.05568032474896 |
| 19.5699995625764 | 3.00518069609300 |
| 19.5724995625205 | 2.06359921608582 |
| 19.5749995624647 | 3.01660333899802 |
| 19.5774995624088 | 2.08038380215719 |
| 19.5799995623529 | 3.02213062947947 |
| 19.5824995622970 | 2.09288507000934 |
| 19.5849995622411 | 3.03575628198494 |
| 19.5874995621853 | 2.10944422805439 |
| 19.5899995621294 | 3.07601139634576 |
| 19.5924995620735 | 2.14522125101282 |
| 19.5949995620176 | 3.10683078324263 |
| 19.5974995619617 | 2.18707703879242 |
| 19.5999995619059 | 3.13414043581362 |
| 19.6024995618500 | 2.20760090089898 |
| 19.6049995617941 | 3.14400126631797 |
| 19.6074995617382 | 2.19874701924255 |
| 19.6099995616823 | 3.16650806120322 |
| 19.6124995616265 | 2.18488863480133 |
| 19.6149995615706 | 3.16214487375927 |
| 19.6174995615147 | 2.17943450954646 |
| 19.6199995614588 | 3.15220508891316 |
| 19.6224995614029 | 2.16913597811433 |
| 19.6249995613471 | 3.12788567299398 |
| 19.6274995612912 | 2.13318734697096 |
| 19.6299995612353 | 3.12155587444370 |
| 19.6324995611794 | 2.08539569892742 |
| 19.6349995611235 | 3.10790749780540 |
| 19.6374995610677 | 2.06272028205911 |
| 19.6399995610118 | 3.08403778505404 |
| 19.6424995609559 | 2.07488558842867 |

|                  |                  |
|------------------|------------------|
| 19.6449995609000 | 3.05081957829597 |
| 19.6474995608442 | 2.09904184156534 |
| 19.6499995607883 | 3.03123074966819 |
| 19.6524995607324 | 2.11223110211075 |
| 19.6549995606765 | 3.02751087500508 |
| 19.6574995606206 | 2.12490218210651 |
| 19.6599995605648 | 3.01814734548382 |
| 19.6624995605089 | 2.14154680091681 |
| 19.6649995604530 | 3.01398451141027 |
| 19.6674995603971 | 2.15805062761071 |
| 19.6699995603412 | 3.01544687456917 |
| 19.6724995602854 | 2.16169846503484 |
| 19.6749995602295 | 3.02588974226392 |
| 19.6774995601736 | 2.15475571221682 |
| 19.6799995601177 | 3.02487742219582 |
| 19.6824995600618 | 2.13735302096893 |
| 19.6849995600060 | 3.01803565569478 |
| 19.6874995599501 | 2.11314806914092 |
| 19.6899995598942 | 3.02006770919693 |
| 19.6924995598383 | 2.08746310238193 |
| 19.6949995597824 | 3.04843776119212 |
| 19.6974995597266 | 2.07470315787054 |
| 19.6999995596707 | 3.07866788313793 |
| 19.7024995596148 | 2.07875341528547 |
| 19.7049995595589 | 3.08951107709327 |
| 19.7074995595030 | 2.08879057471088 |
| 19.7099995594472 | 3.09965419311606 |
| 19.7124995593913 | 2.10683090274398 |
| 19.7149995593354 | 3.12305271466509 |
| 19.7174995592795 | 2.14392089512393 |
| 19.7199995592237 | 3.15026212885738 |
| 19.7224995591678 | 2.19097306941550 |
| 19.7249995591119 | 3.15325181249928 |
| 19.7274995590560 | 2.21592558781449 |
| 19.7299995590001 | 3.15062639617854 |
| 19.7324995589443 | 2.20915106009277 |
| 19.7349995588884 | 3.15978217569930 |
| 19.7374995588325 | 2.19385528619665 |
| 19.7399995587766 | 3.16227783776442 |
| 19.7424995587207 | 2.18789746160303 |
| 19.7449995586649 | 3.13528941656285 |
| 19.7474995586090 | 2.17625255634749 |
| 19.7499995585531 | 3.08662409097545 |
| 19.7524995584972 | 2.13498814668841 |
| 19.7549995584413 | 3.05739576743427 |
| 19.7574995583855 | 2.07859740724437 |
| 19.7599995583296 | 3.04174377719262 |
| 19.7624995582737 | 2.04811142256031 |
| 19.7649995582178 | 3.02147497119701 |
| 19.7674995581619 | 2.05001062578807 |
| 19.7699995581061 | 2.99158217802754 |
| 19.7724995580502 | 2.06048854794221 |

|                  |                  |
|------------------|------------------|
| 19.7749995579943 | 2.99165420813920 |
| 19.7774995579384 | 2.07018747320768 |
| 19.7799995578825 | 3.00177173882143 |
| 19.7824995578267 | 2.10230628727262 |
| 19.7849995577708 | 3.01114664781508 |
| 19.7874995577149 | 2.15069985225182 |
| 19.7899995576590 | 3.00660742860387 |
| 19.7924995576032 | 2.18874613730556 |
| 19.7949995575473 | 3.03130853254317 |
| 19.7974995574914 | 2.19295604517031 |
| 19.7999995574355 | 3.06629021381636 |
| 19.8024995573796 | 2.17830627091922 |
| 19.8049995573238 | 3.09666920016362 |
| 19.8074995572679 | 2.16362710934602 |
| 19.8099995572120 | 3.09740835619926 |
| 19.8124995571561 | 2.15147119724945 |
| 19.8149995571002 | 3.10034978949295 |
| 19.8174995570444 | 2.13065540867100 |
| 19.8199995569885 | 3.11299349768579 |
| 19.8224995569326 | 2.10368740946605 |
| 19.8249995568767 | 3.12502740444464 |
| 19.8274995568208 | 2.08218633443671 |
| 19.8299995567650 | 3.11886932173632 |
| 19.8324995567091 | 2.07366484389788 |
| 19.8349995566532 | 3.11551895937435 |
| 19.8374995565973 | 2.08456600525049 |
| 19.8399995565414 | 3.13058905294531 |
| 19.8424995564856 | 2.11854017013343 |
| 19.8449995564297 | 3.13424948906943 |
| 19.8474995563738 | 2.16158214767193 |
| 19.8499995563179 | 3.12648305595569 |
| 19.8524995562620 | 2.18987855991012 |
| 19.8549995562062 | 3.09741971148761 |
| 19.8574995561503 | 2.19613511701808 |
| 19.8599995560944 | 3.09787363287159 |
| 19.8624995560385 | 2.19467097933585 |
| 19.8649995559826 | 3.08546844544309 |
| 19.8674995559268 | 2.19180194062922 |
| 19.8699995558709 | 3.07496258406814 |
| 19.8724995558150 | 2.17280497657038 |
| 19.8749995557591 | 3.03357240108622 |
| 19.8774995557033 | 2.12653973812294 |
| 19.8799995556474 | 3.01696351765761 |
| 19.8824995555915 | 2.07227721335202 |
| 19.8849995555356 | 2.99910549631886 |
| 19.8874995554797 | 2.04540141776865 |
| 19.8899995554239 | 2.99005428472678 |
| 19.8924995553680 | 2.04601158218154 |
| 19.8949995553121 | 2.97691890000534 |
| 19.8974995552562 | 2.05304933322534 |
| 19.8999995552003 | 2.99213731324366 |
| 19.9024995551445 | 2.05647815592070 |



|                  |                  |
|------------------|------------------|
| 19.9049995550886 | 3.02826150652169 |
| 19.9074995550327 | 2.08734579411726 |
| 19.9099995549768 | 3.05802955222035 |
| 19.9124995549209 | 2.14516930215263 |
| 19.9149995548651 | 3.07834935819442 |
| 19.9174995548092 | 2.20466387740422 |
| 19.9199995547533 | 3.09297594025204 |
| 19.9224995546974 | 2.22898620496427 |
| 19.9249995546415 | 3.13100850789023 |
| 19.9274995545857 | 2.22555973783406 |
| 19.9299995545298 | 3.15005169855052 |
| 19.9324995544739 | 2.20920011363638 |
| 19.9349995544180 | 3.16482849602344 |
| 19.9374995543621 | 2.19215546470819 |
| 19.9399995543063 | 3.15598128015567 |
| 19.9424995542504 | 2.16535762834087 |
| 19.9449995541945 | 3.16096685035386 |
| 19.9474995541386 | 2.13000426144503 |
| 19.9499995540828 | 3.14212404140702 |
| 19.9524995540269 | 2.09285594124130 |
| 19.9549995539710 | 3.11437268228708 |
| 19.9574995539151 | 2.06555093671156 |
| 19.9599995538592 | 3.08065910071351 |
| 19.9624995538034 | 2.05757373976293 |
| 19.9649995537475 | 3.07386381745418 |
| 19.9674995536916 | 2.07262132133393 |
| 19.9699995536357 | 3.07182857798755 |
| 19.9724995535798 | 2.10444248370299 |
| 19.9749995535240 | 3.06072772307290 |
| 19.9774995534681 | 2.13243448613691 |
| 19.9799995534122 | 3.04217276117662 |
| 19.9824995533563 | 2.15471545524345 |
| 19.9849995533004 | 3.03834133516644 |
| 19.9874995532446 | 2.17676055223467 |
| 19.9899995531887 | 3.03621375997887 |
| 19.9924995531328 | 2.19904524430581 |
| 19.9949995530769 | 3.02168355365813 |
| 19.9974995530210 | 2.19305827463522 |
| 19.9999995529652 | 3.01017072790947 |
| 20.0024995529093 | 2.15303053196953 |
| 20.0049995528534 | 3.01634631177738 |
| 20.0074995527975 | 2.10024673058191 |
| 20.0099995527416 | 3.03547412938061 |
| 20.0124995526858 | 2.07449861882070 |
| 20.0149995526299 | 3.03095524887221 |
| 20.0174995525740 | 2.06916958961174 |
| 20.0199995525181 | 3.02650024833321 |
| 20.0224995524622 | 2.06148499903468 |
| 20.0249995524064 | 3.03755811111590 |
| 20.0274995523505 | 2.05101272552586 |
| 20.0299995522946 | 3.07404915080908 |
| 20.0324995522387 | 2.07711648973499 |

|                  |                  |
|------------------|------------------|
| 20.0349995521829 | 3.09551495326723 |
| 20.0374995521270 | 2.13045083863932 |
| 20.0399995520711 | 3.11374384612061 |
| 20.0424995520152 | 2.17836007324248 |
| 20.0449995519593 | 3.14238756055758 |
| 20.0474995519035 | 2.20039774756611 |
| 20.0499995518476 | 3.17633794018883 |
| 20.0524995517917 | 2.21701095808410 |
| 20.0549995517358 | 3.18211303155875 |
| 20.0574995516799 | 2.23223532519961 |
| 20.0599995516241 | 3.16423362217868 |
| 20.0624995515682 | 2.23426947173187 |
| 20.0649995515123 | 3.14933369232255 |
| 20.0674995514564 | 2.20717091065735 |
| 20.0699995514005 | 3.14059812941691 |
| 20.0724995513447 | 2.15726620416675 |
| 20.0749995512888 | 3.12385906280677 |
| 20.0774995512329 | 2.10537596872863 |
| 20.0799995511770 | 3.08423952189207 |
| 20.0824995511211 | 2.06589293276806 |
| 20.0849995510653 | 3.04940727397867 |
| 20.0874995510094 | 2.04794822285843 |
| 20.0899995509535 | 3.02319286465766 |
| 20.0924995508976 | 2.04682065397557 |
| 20.0949995508417 | 3.01116533389450 |
| 20.0974995507859 | 2.06141052824516 |
| 20.0999995507300 | 2.99542656964530 |
| 20.1024995506741 | 2.08217716323299 |
| 20.1049995506182 | 2.99077241196284 |
| 20.1074995505624 | 2.11454951981835 |
| 20.1099995505065 | 3.00604705709625 |
| 20.1124995504506 | 2.15170445699241 |
| 20.1149995503947 | 3.02617779867707 |
| 20.1174995503388 | 2.18829114973762 |
| 20.1199995502830 | 3.04282832773556 |
| 20.1224995502271 | 2.20137239407875 |
| 20.1249995501712 | 3.04586332258902 |
| 20.1274995501153 | 2.18888189010211 |
| 20.1299995500594 | 3.05991454465823 |
| 20.1324995500036 | 2.15977422701564 |
| 20.1349995499477 | 3.07499298616192 |
| 20.1374995498918 | 2.13819980046861 |
| 20.1399995498359 | 3.09464147335762 |
| 20.1424995497800 | 2.11715656948890 |
| 20.1449995497242 | 3.09652387106462 |
| 20.1474995496683 | 2.08743473912336 |
| 20.1499995496124 | 3.10649156495620 |
| 20.1524995495565 | 2.05766084494943 |
| 20.1549995495006 | 3.11498170479684 |
| 20.1574995494448 | 2.06384451245630 |
| 20.1599995493889 | 3.12589612969753 |
| 20.1624995493330 | 2.10497287732764 |

|                  |                  |
|------------------|------------------|
| 20.1649995492771 | 3.12243452288899 |
| 20.1674995492212 | 2.14838619528869 |
| 20.1699995491654 | 3.12887593616781 |
| 20.1724995491095 | 2.16755330418931 |
| 20.1749995490536 | 3.14201651536875 |
| 20.1774995489977 | 2.17915677811419 |
| 20.1799995489419 | 3.14626874870632 |
| 20.1824995488860 | 2.19790010019928 |
| 20.1849995488301 | 3.13618350842963 |
| 20.1874995487742 | 2.21712267043143 |
| 20.1899995487183 | 3.10585523600264 |
| 20.1924995486625 | 2.21358791323611 |
| 20.1949995486066 | 3.08569988280179 |
| 20.1974995485507 | 2.17973793831873 |
| 20.1999995484948 | 3.05348068085374 |
| 20.2024995484389 | 2.12805897813641 |
| 20.2049995483831 | 3.02668772333206 |
| 20.2074995483272 | 2.07782851674290 |
| 20.2099995482713 | 2.99877582958580 |
| 20.2124995482154 | 2.04661141450838 |
| 20.2149995481595 | 2.99847454733970 |
| 20.2174995481037 | 2.03518560135925 |
| 20.2199995480478 | 2.99025324880051 |
| 20.2224995479919 | 2.04195177806945 |
| 20.2249995479360 | 2.99001137101734 |
| 20.2274995478801 | 2.06001835720292 |
| 20.2299995478243 | 2.99321857629108 |
| 20.2324995477684 | 2.09812591032974 |
| 20.2349995477125 | 3.02818837784343 |
| 20.2374995476566 | 2.14757366385184 |
| 20.2399995476007 | 3.06053472702876 |
| 20.2424995475449 | 2.19810283634888 |
| 20.2449995474890 | 3.09076439573465 |
| 20.2474995474331 | 2.21969759986670 |
| 20.2499995473772 | 3.11594624296152 |
| 20.2524995473213 | 2.21685532621775 |
| 20.2549995472655 | 3.14365874308599 |
| 20.2574995472096 | 2.20470129532007 |
| 20.2599995471537 | 3.15907332763217 |
| 20.2624995470978 | 2.19954395699131 |
| 20.2649995470420 | 3.14968268722057 |
| 20.2674995469861 | 2.17791734210507 |
| 20.2699995469302 | 3.14154746862195 |
| 20.2724995468743 | 2.13068429673685 |
| 20.2749995468184 | 3.13382208233668 |
| 20.2774995467626 | 2.07696700147643 |
| 20.2799995467067 | 3.13566167467889 |
| 20.2824995466508 | 2.05797718283780 |
| 20.2849995465949 | 3.11342536672344 |
| 20.2874995465390 | 2.07161573382348 |
| 20.2899995464832 | 3.09761048183418 |
| 20.2924995464273 | 2.09359407623350 |

|                  |                  |
|------------------|------------------|
| 20.2949995463714 | 3.07845181780485 |
| 20.2974995463155 | 2.11024806427894 |
| 20.2999995462596 | 3.07806152216131 |
| 20.3024995462038 | 2.13700383447433 |
| 20.3049995461479 | 3.06029657939243 |
| 20.3074995460920 | 2.17032053879352 |
| 20.3099995460361 | 3.05206883109883 |
| 20.3124995459802 | 2.19265465679026 |
| 20.3149995459244 | 3.03956713184114 |
| 20.3174995458685 | 2.19313183081729 |
| 20.3199995458126 | 3.03812253416563 |
| 20.3224995457567 | 2.17489286335925 |
| 20.3249995457008 | 3.02249288902323 |
| 20.3274995456450 | 2.14905265942554 |
| 20.3299995455891 | 3.00385724739609 |
| 20.3324995455332 | 2.11405820422192 |
| 20.3349995454773 | 2.99868029682892 |
| 20.3374995454215 | 2.08036750966025 |
| 20.3399995453656 | 3.00787543748573 |
| 20.3424995453097 | 2.04826174764384 |
| 20.3449995452538 | 3.02758724151791 |
| 20.3474995451979 | 2.03840471547777 |
| 20.3499995451421 | 3.03540220037181 |
| 20.3524995450862 | 2.05143143539383 |
| 20.3549995450303 | 3.06021360630970 |
| 20.3574995449744 | 2.09527435924368 |
| 20.3599995449185 | 3.08395187350403 |
| 20.3624995448627 | 2.14704771496746 |
| 20.3649995448068 | 3.12224946990996 |
| 20.3674995447509 | 2.19601551538349 |
| 20.3699995446950 | 3.14062585146178 |
| 20.3724995446391 | 2.22086179913902 |
| 20.3749995445833 | 3.16618484031523 |
| 20.3774995445274 | 2.23263613427020 |
| 20.3799995444715 | 3.18136018571994 |
| 20.3824995444156 | 2.23557748112160 |
| 20.3849995443597 | 3.19144241918556 |
| 20.3874995443039 | 2.23384728980340 |
| 20.3899995442480 | 3.17165094103087 |
| 20.3924995441921 | 2.20809759039427 |
| 20.3949995441362 | 3.14235923022830 |
| 20.3974995440803 | 2.15520556088207 |
| 20.3999995440245 | 3.11542083745102 |
| 20.4024995439686 | 2.09502798725315 |
| 20.4049995439127 | 3.09256994963428 |
| 20.4074995438568 | 2.05985927205938 |
| 20.4099995438010 | 3.06838921244307 |
| 20.4124995437451 | 2.05158616621896 |
| 20.4149995436892 | 3.03718054244920 |
| 20.4174995436333 | 2.04634803957220 |
| 20.4199995435774 | 3.02487985937458 |
| 20.4224995435216 | 2.05176730457891 |

|                  |                  |
|------------------|------------------|
| 20.4249995434657 | 3.01748561218525 |
| 20.4274995434098 | 2.08927467299755 |
| 20.4299995433539 | 3.01275198743574 |
| 20.4324995432980 | 2.15219642667067 |
| 20.4349995432422 | 3.00038131985603 |
| 20.4374995431863 | 2.19562624069421 |
| 20.4399995431304 | 3.01424922755402 |
| 20.4424995430745 | 2.20576670514789 |
| 20.4449995430186 | 3.03842297564641 |
| 20.4474995429628 | 2.19127869100532 |
| 20.4499995429069 | 3.06126251319435 |
| 20.4524995428510 | 2.17829949733777 |
| 20.4549995427951 | 3.06240644474652 |
| 20.4574995427392 | 2.16005700692459 |
| 20.4599995426834 | 3.06720433924543 |
| 20.4624995426275 | 2.13680437828197 |
| 20.4649995425716 | 3.07821862533609 |
| 20.4674995425157 | 2.09995132956957 |
| 20.4699995424598 | 3.08717201062866 |
| 20.4724995424040 | 2.06575644920910 |
| 20.4749995423481 | 3.08961130900588 |
| 20.4774995422922 | 2.04673467152389 |
| 20.4799995422363 | 3.10280099635152 |
| 20.4824995421804 | 2.06546183702483 |
| 20.4849995421246 | 3.13124443534915 |
| 20.4874995420687 | 2.11138885498740 |
| 20.4899995420128 | 3.14883700788275 |
| 20.4924995419569 | 2.16076691882165 |
| 20.4949995419011 | 3.15126292990937 |
| 20.4974995418452 | 2.19273959704886 |
| 20.4999995417893 | 3.14731276643472 |
| 20.5024995417334 | 2.21749140825235 |
| 20.5049995416775 | 3.15413193907579 |
| 20.5074995416217 | 2.23854709854897 |
| 20.5099995415658 | 3.14971650228493 |
| 20.5124995415099 | 2.24853700219098 |
| 20.5149995414540 | 3.13219467066608 |
| 20.5174995413981 | 2.22645902987457 |
| 20.5199995413423 | 3.10666453868727 |
| 20.5224995412864 | 2.17213489873304 |
| 20.5249995412305 | 3.08800088664252 |
| 20.5274995411746 | 2.11450706232658 |
| 20.5299995411187 | 3.05976067978314 |
| 20.5324995410629 | 2.07861105401588 |
| 20.5349995410070 | 3.02169833302036 |
| 20.5374995409511 | 2.05976984016880 |
| 20.5399995408952 | 2.99048176844618 |
| 20.5424995408393 | 2.03420190931407 |
| 20.5449995407835 | 2.98475597711890 |
| 20.5474995407276 | 2.02043169272930 |
| 20.5499995406717 | 2.99833171012065 |
| 20.5524995406158 | 2.04675018665518 |

|                  |                  |
|------------------|------------------|
| 20.5549995405599 | 3.01003132149352 |
| 20.5574995405041 | 2.11197871128049 |
| 20.5599995404482 | 3.02497240257048 |
| 20.5624995403923 | 2.17447632211919 |
| 20.5649995403364 | 3.05088030386592 |
| 20.5674995402806 | 2.21749841422807 |
| 20.5699995402247 | 3.07946968017709 |
| 20.5724995401688 | 2.23763163277091 |
| 20.5749995401129 | 3.09857050687636 |
| 20.5774995400570 | 2.24670587768760 |
| 20.5799995400012 | 3.11582803882194 |
| 20.5824995399453 | 2.23485704833643 |
| 20.5849995398894 | 3.14039564819180 |
| 20.5874995398335 | 2.20739366123626 |
| 20.5899995397776 | 3.15967501607665 |
| 20.5924995397218 | 2.16524430503096 |
| 20.5949995396659 | 3.16087867532052 |
| 20.5974995396100 | 2.12450486064353 |
| 20.5999995395541 | 3.14139043719656 |
| 20.6024995394982 | 2.09147262093100 |
| 20.6049995394424 | 3.12621568992192 |
| 20.6074995393865 | 2.08032305965444 |
| 20.6099995393306 | 3.11357151844453 |
| 20.6124995392747 | 2.08300190806466 |
| 20.6149995392188 | 3.10616841609884 |
| 20.6174995391630 | 2.09536672372189 |
| 20.6199995391071 | 3.08540847124558 |
| 20.6224995390512 | 2.10850632645031 |
| 20.6249995389953 | 3.07729520716944 |
| 20.6274995389394 | 2.13345067291958 |
| 20.6299995388836 | 3.06990056429537 |
| 20.6324995388277 | 2.17001473608476 |
| 20.6349995387718 | 3.05749117962898 |
| 20.6374995387159 | 2.20545666113801 |
| 20.6399995386600 | 3.03099915055135 |
| 20.6424995386042 | 2.21781325712536 |
| 20.6449995385483 | 3.00383566187267 |
| 20.6474995384924 | 2.20036605999093 |
| 20.6499995384365 | 2.99997529837114 |
| 20.6524995383807 | 2.17127677680691 |
| 20.6549995383248 | 3.00422161288311 |
| 20.6574995382689 | 2.14102489780829 |
| 20.6599995382130 | 3.01020709258782 |
| 20.6624995381571 | 2.11572108105251 |
| 20.6649995381013 | 2.99937451633170 |
| 20.6674995380454 | 2.08259900284860 |
| 20.6699995379895 | 3.00830405999227 |
| 20.6724995379336 | 2.06188843680375 |
| 20.6749995378777 | 3.01556781571000 |
| 20.6774995378219 | 2.06898903259853 |
| 20.6799995377660 | 3.03040959508216 |
| 20.6824995377101 | 2.10462492986731 |



|                  |                  |
|------------------|------------------|
| 20.6849995376542 | 3.03729320263652 |
| 20.6874995375983 | 2.13128023535667 |
| 20.6899995375425 | 3.07221908120661 |
| 20.6924995374866 | 2.14708006534596 |
| 20.6949995374307 | 3.10794432386457 |
| 20.6974995373748 | 2.16731473505211 |
| 20.6999995373189 | 3.13986295663027 |
| 20.7024995372631 | 2.20738152075916 |
| 20.7049995372072 | 3.14320500671305 |
| 20.7074995371513 | 2.24318015520243 |
| 20.7099995370954 | 3.14873914897900 |
| 20.7124995370395 | 2.25735100129909 |
| 20.7149995369837 | 3.15705656778272 |
| 20.7174995369278 | 2.24635017585327 |
| 20.7199995368719 | 3.15870395448212 |
| 20.7224995368160 | 2.22728519703001 |
| 20.7249995367602 | 3.15091993422699 |
| 20.7274995367043 | 2.20330107798412 |
| 20.7299995366484 | 3.14176650479456 |
| 20.7324995365925 | 2.17771182562730 |
| 20.7349995365366 | 3.13703215297660 |
| 20.7374995364808 | 2.15063611065982 |
| 20.7399995364249 | 3.10695716223607 |
| 20.7424995363690 | 2.12438158704221 |
| 20.7449995363131 | 3.06723855193364 |
| 20.7474995362572 | 2.09884201248355 |
| 20.7499995362014 | 3.02181524389067 |
| 20.7524995361455 | 2.08172043088836 |
| 20.7549995360896 | 3.00659648149432 |
| 20.7574995360337 | 2.08042640939808 |
| 20.7599995359778 | 2.98923485775073 |
| 20.7624995359220 | 2.08713649818573 |
| 20.7649995358661 | 2.98193573193337 |
| 20.7674995358102 | 2.09470218047793 |
| 20.7699995357543 | 2.97098793706134 |
| 20.7724995356984 | 2.10401151917617 |
| 20.7749995356426 | 2.99009064048467 |
| 20.7774995355867 | 2.13244184379059 |
| 20.7799995355308 | 2.99566833673489 |
| 20.7824995354749 | 2.16662188036353 |
| 20.7849995354190 | 3.00536100970832 |
| 20.7874995353632 | 2.18632994712349 |
| 20.7899995353073 | 3.01476342377889 |
| 20.7924995352514 | 2.17233321449012 |
| 20.7949995351955 | 3.05163598823238 |
| 20.7974995351397 | 2.15382181352126 |
| 20.7999995350838 | 3.08639616570653 |
| 20.8024995350279 | 2.15042693271569 |
| 20.8049995349720 | 3.10255491526725 |
| 20.8074995349161 | 2.16067856520700 |
| 20.8099995348603 | 3.10448454691725 |
| 20.8124995348044 | 2.15263556564761 |

|                  |                  |
|------------------|------------------|
| 20.8149995347485 | 3.10927916515854 |
| 20.8174995346926 | 2.12483058269712 |
| 20.8199995346367 | 3.12811711393707 |
| 20.8224995345809 | 2.10678746233335 |
| 20.8249995345250 | 3.12912966392030 |
| 20.8274995344691 | 2.11602987764493 |
| 20.8299995344132 | 3.12973138522574 |
| 20.8324995343573 | 2.13363278443175 |
| 20.8349995343015 | 3.12815822277023 |
| 20.8374995342456 | 2.13726197622776 |
| 20.8399995341897 | 3.14195077309146 |
| 20.8424995341338 | 2.13933519763547 |
| 20.8449995340779 | 3.13099161575131 |
| 20.8474995340221 | 2.15369321871384 |
| 20.8499995339662 | 3.11101226774325 |
| 20.8524995339103 | 2.17646955946046 |
| 20.8549995338544 | 3.08360403805644 |
| 20.8574995337985 | 2.18528302520200 |
| 20.8599995337427 | 3.07665991558346 |
| 20.8624995336868 | 2.17657930997265 |
| 20.8649995336309 | 3.06508220156654 |
| 20.8674995335750 | 2.15600480670754 |
| 20.8699995335191 | 3.04386169154218 |
| 20.8724995334633 | 2.13580427410964 |
| 20.8749995334074 | 3.01254360392493 |
| 20.8774995333515 | 2.11565671707794 |
| 20.8799995332956 | 2.99193975037099 |
| 20.8824995332398 | 2.09920695884755 |
| 20.8849995331839 | 2.98351362415123 |
| 20.8874995331280 | 2.08074191686860 |
| 20.8899995330721 | 2.97456098351236 |
| 20.8924995330162 | 2.06282278578699 |
| 20.8949995329604 | 2.97816431807800 |
| 20.8974995329045 | 2.05436528880942 |
| 20.8999995328486 | 3.00378865882189 |
| 20.9024995327927 | 2.07479671200120 |
| 20.9049995327368 | 3.04222296983916 |
| 20.9074995326810 | 2.12043036969880 |
| 20.9099995326251 | 3.06749303833913 |
| 20.9124995325692 | 2.16500077743289 |
| 20.9149995325133 | 3.08348428813283 |
| 20.9174995324574 | 2.18723059336893 |
| 20.9199995324016 | 3.10665520198605 |
| 20.9224995323457 | 2.19889584925912 |
| 20.9249995322898 | 3.13973122570754 |
| 20.9274995322339 | 2.21460731603799 |
| 20.9299995321780 | 3.16070122932380 |
| 20.9324995321222 | 2.22402462326320 |
| 20.9349995320663 | 3.16346577346713 |
| 20.9374995320104 | 2.20522163376247 |
| 20.9399995319545 | 3.16334392991293 |
| 20.9424995318986 | 2.16193359221693 |

|                  |                  |
|------------------|------------------|
| 20.9449995318428 | 3.15910908792558 |
| 20.9474995317869 | 2.12772532696634 |
| 20.9499995317310 | 3.13686968907939 |
| 20.9524995316751 | 2.11359783279861 |
| 20.9549995316193 | 3.09801068958953 |
| 20.9574995315634 | 2.10092854189713 |
| 20.9599995315075 | 3.07535262249161 |
| 20.9624995314516 | 2.07027069749345 |
| 20.9649995313957 | 3.07031304388022 |
| 20.9674995313399 | 2.05186295262671 |
| 20.9699995312840 | 3.06555531334227 |
| 20.9724995312281 | 2.07125042428915 |
| 20.9749995311722 | 3.04327374895030 |
| 20.9774995311163 | 2.11938576868134 |
| 20.9799995310605 | 3.02315916507931 |
| 20.9824995310046 | 2.16141963890125 |
| 20.9849995309487 | 3.01896557372587 |
| 20.9874995308928 | 2.18834965784607 |
| 20.9899995308369 | 3.01364499296284 |
| 20.9924995307811 | 2.19549698312819 |
| 20.9949995307252 | 3.00401220973884 |
| 20.9974995306693 | 2.18701586620925 |
| 20.9999995306134 | 3.00485053095724 |
| 21.0024995305575 | 2.16127379298181 |
| 21.0049995305017 | 3.02598680442744 |
| 21.0074995304458 | 2.13107896710422 |
| 21.0099995303899 | 3.03393955367308 |
| 21.0124995303340 | 2.10100456208596 |
| 21.0149995302781 | 3.02989103724903 |
| 21.0174995302223 | 2.07219035134348 |
| 21.0199995301664 | 3.02104937003204 |
| 21.0224995301105 | 2.04987585283914 |
| 21.0249995300546 | 3.04392348819086 |
| 21.0274995299987 | 2.05260490727904 |
| 21.0299995299429 | 3.07387282499602 |
| 21.0324995298870 | 2.08093430651162 |
| 21.0349995298311 | 3.10984129542538 |
| 21.0374995297752 | 2.11627809885232 |
| 21.0399995297194 | 3.13095374579328 |
| 21.0424995296635 | 2.14853382892474 |
| 21.0449995296076 | 3.16466202674251 |
| 21.0474995295517 | 2.18981468751719 |
| 21.0499995294958 | 3.17902317600564 |
| 21.0524995294400 | 2.24032430488892 |
| 21.0549995293841 | 3.18022403719329 |
| 21.0574995293282 | 2.27415045212163 |
| 21.0599995292723 | 3.16251053237266 |
| 21.0624995292164 | 2.26874155782672 |
| 21.0649995291606 | 3.15007527207462 |
| 21.0674995291047 | 2.22555136063718 |
| 21.0699995290488 | 3.14179989981714 |
| 21.0724995289929 | 2.17461207806772 |

|                  |                  |
|------------------|------------------|
| 21.0749995289370 | 3.11991243171054 |
| 21.0774995288812 | 2.12862436147034 |
| 21.0799995288253 | 3.08358083312194 |
| 21.0824995287694 | 2.08791960246198 |
| 21.0849995287135 | 3.03198473830278 |
| 21.0874995286576 | 2.04049930500307 |
| 21.0899995286018 | 3.00364908229274 |
| 21.0924995285459 | 2.01169193304268 |
| 21.0949995284900 | 2.97785206452755 |
| 21.0974995284341 | 2.01829939831532 |
| 21.0999995283782 | 2.97260107975591 |
| 21.1024995283224 | 2.06018915005856 |
| 21.1049995282665 | 2.97401045831819 |
| 21.1074995282106 | 2.10706598564022 |
| 21.1099995281547 | 3.01102777889760 |
| 21.1124995280989 | 2.15499683059558 |
| 21.1149995280430 | 3.03113949361243 |
| 21.1174995279871 | 2.19834858621967 |
| 21.1199995279312 | 3.05252686820559 |
| 21.1224995278753 | 2.23259097065047 |
| 21.1249995278195 | 3.05753155440349 |
| 21.1274995277636 | 2.24152208808278 |
| 21.1299995277077 | 3.08488898933560 |
| 21.1324995276518 | 2.22343702965341 |
| 21.1349995275959 | 3.10718770646561 |
| 21.1374995275401 | 2.18378162872687 |
| 21.1399995274842 | 3.11975887475010 |
| 21.1424995274283 | 2.13356980007170 |
| 21.1449995273724 | 3.12099654080391 |
| 21.1474995273165 | 2.08823670940964 |
| 21.1499995272607 | 3.12507622770021 |
| 21.1524995272048 | 2.06274006908626 |
| 21.1549995271489 | 3.12923000648370 |
| 21.1574995270930 | 2.06324043939842 |
| 21.1599995270371 | 3.11588215153735 |
| 21.1624995269813 | 2.07322254103340 |
| 21.1649995269254 | 3.10888667252330 |
| 21.1674995268695 | 2.09095750711797 |
| 21.1699995268136 | 3.11406183942853 |
| 21.1724995267577 | 2.12528640208279 |
| 21.1749995267019 | 3.13079683736537 |
| 21.1774995266460 | 2.17919728697450 |
| 21.1799995265901 | 3.11921554454994 |
| 21.1824995265342 | 2.22154783215780 |
| 21.1849995264784 | 3.10411523776389 |
| 21.1874995264225 | 2.23442542344358 |
| 21.1899995263666 | 3.08184870888498 |
| 21.1924995263107 | 2.22027642497010 |
| 21.1949995262548 | 3.07655771231372 |
| 21.1974995261990 | 2.20307678755871 |
| 21.1999995261431 | 3.04726487596156 |
| 21.2024995260872 | 2.17202615237570 |

|                  |                  |
|------------------|------------------|
| 21.2049995260313 | 3.02309717280556 |
| 21.2074995259754 | 2.11871974800444 |
| 21.2099995259196 | 3.00185140496211 |
| 21.2124995258637 | 2.05009404717296 |
| 21.2149995258078 | 3.00109661512005 |
| 21.2174995257519 | 2.01395727845975 |
| 21.2199995256960 | 2.98823851313194 |
| 21.2224995256402 | 2.02310506246809 |
| 21.2249995255843 | 2.97845946434092 |
| 21.2274995255284 | 2.05533028222035 |
| 21.2299995254725 | 2.99615756566657 |
| 21.2324995254166 | 2.08480130662109 |
| 21.2349995253608 | 3.04007017813553 |
| 21.2374995253049 | 2.12196196100048 |
| 21.2399995252490 | 3.08190639553280 |
| 21.2424995251931 | 2.17299393147910 |
| 21.2449995251372 | 3.10710123175799 |
| 21.2474995250814 | 2.22303680252824 |
| 21.2499995250255 | 3.13302554067103 |
| 21.2524995249696 | 2.25409477663207 |
| 21.2549995249137 | 3.15475064002735 |
| 21.2574995248578 | 2.25551661653157 |
| 21.2599995248020 | 3.17185829762507 |
| 21.2624995247461 | 2.23211719130538 |
| 21.2649995246902 | 3.16398745979089 |
| 21.2674995246343 | 2.18981452213104 |
| 21.2699995245785 | 3.16338741915466 |
| 21.2724995245226 | 2.14713374752343 |
| 21.2749995244667 | 3.15709261255700 |
| 21.2774995244108 | 2.10974604715852 |
| 21.2799995243549 | 3.14544147193490 |
| 21.2824995242991 | 2.08243285362986 |
| 21.2849995242432 | 3.10764707501688 |
| 21.2874995241873 | 2.05974543085232 |
| 21.2899995241314 | 3.07010591442217 |
| 21.2924995240755 | 2.05572927707347 |
| 21.2949995240197 | 3.04630994481356 |
| 21.2974995239638 | 2.07550272770960 |
| 21.2999995239079 | 3.03370529564590 |
| 21.3024995238520 | 2.11381278253350 |
| 21.3049995237961 | 3.02758535928964 |
| 21.3074995237403 | 2.14238169378871 |
| 21.3099995236844 | 3.02333875279467 |
| 21.3124995236285 | 2.15710321506274 |
| 21.3149995235726 | 3.02710122170336 |
| 21.3174995235167 | 2.16737918190473 |
| 21.3199995234609 | 3.02604635981308 |
| 21.3224995234050 | 2.18435164604855 |
| 21.3249995233491 | 3.01499374458008 |
| 21.3274995232932 | 2.18706387423550 |
| 21.3299995232373 | 3.00347734661142 |
| 21.3324995231815 | 2.15836244136012 |

|                  |                  |
|------------------|------------------|
| 21.3349995231256 | 3.01156850329259 |
| 21.3374995230697 | 2.10361353058493 |
| 21.3399995230138 | 3.03140673102670 |
| 21.3424995229580 | 2.06382361168730 |
| 21.3449995229021 | 3.05130062729994 |
| 21.3474995228462 | 2.06094803237442 |
| 21.3499995227903 | 3.05940672530623 |
| 21.3524995227344 | 2.07944027370829 |
| 21.3549995226786 | 3.06857814525897 |
| 21.3574995226227 | 2.09459586919028 |
| 21.3599995225668 | 3.08809836421591 |
| 21.3624995225109 | 2.11181407630714 |
| 21.3649995224550 | 3.10418811959987 |
| 21.3674995223992 | 2.14110131574617 |
| 21.3699995223433 | 3.12062876020394 |
| 21.3724995222874 | 2.17307514415011 |
| 21.3749995222315 | 3.14035213009767 |
| 21.3774995221756 | 2.19397189469715 |
| 21.3799995221198 | 3.17197926111647 |
| 21.3824995220639 | 2.20047742127089 |
| 21.3849995220080 | 3.17685210062005 |
| 21.3874995219521 | 2.19952527122082 |
| 21.3899995218962 | 3.15659987104162 |
| 21.3924995218404 | 2.18976795964938 |
| 21.3949995217845 | 3.12572078459177 |
| 21.3974995217286 | 2.17480515374964 |
| 21.3999995216727 | 3.10969175865728 |
| 21.4024995216168 | 2.15011613364255 |
| 21.4049995215610 | 3.08797734867777 |
| 21.4074995215051 | 2.11894064446128 |
| 21.4099995214492 | 3.05580654515923 |
| 21.4124995213933 | 2.07688672566657 |
| 21.4149995213374 | 3.02977240416537 |
| 21.4174995212816 | 2.04893662448330 |
| 21.4199995212257 | 3.01543861041673 |
| 21.4224995211698 | 2.05427311054592 |
| 21.4249995211139 | 2.99936505297054 |
| 21.4274995210581 | 2.08993375108160 |
| 21.4299995210022 | 2.97309627698415 |
| 21.4324995209463 | 2.11364017799625 |
| 21.4349995208904 | 2.96682358792514 |
| 21.4374995208345 | 2.11931749296371 |
| 21.4399995207787 | 2.98785664905213 |
| 21.4424995207228 | 2.12321270356835 |
| 21.4449995206669 | 3.02821998873183 |
| 21.4474995206110 | 2.14460076604598 |
| 21.4499995205551 | 3.04599016093536 |
| 21.4524995204993 | 2.16416831807764 |
| 21.4549995204434 | 3.06432594832485 |
| 21.4574995203875 | 2.16219266885678 |
| 21.4599995203316 | 3.07842326450457 |
| 21.4624995202757 | 2.14552797250211 |



|                  |                  |
|------------------|------------------|
| 21.4649995202199 | 3.10019348223962 |
| 21.4674995201640 | 2.13969585681914 |
| 21.4699995201081 | 3.10323748604872 |
| 21.4724995200522 | 2.14262929722199 |
| 21.4749995199963 | 3.11336802039287 |
| 21.4774995199405 | 2.13366587631217 |
| 21.4799995198846 | 3.12770047973172 |
| 21.4824995198287 | 2.11125405969959 |
| 21.4849995197728 | 3.14667187854803 |
| 21.4874995197169 | 2.10019980396461 |
| 21.4899995196611 | 3.14095421824993 |
| 21.4924995196052 | 2.11430475650673 |
| 21.4949995195493 | 3.12459778238624 |
| 21.4974995194934 | 2.13779622447487 |
| 21.4999995194376 | 3.11489362648679 |
| 21.5024995193817 | 2.15435425410145 |
| 21.5049995193258 | 3.11228598499576 |
| 21.5074995192699 | 2.15456960718121 |
| 21.5099995192140 | 3.10587247878418 |
| 21.5124995191582 | 2.14996289112022 |
| 21.5149995191023 | 3.08808818507843 |
| 21.5174995190464 | 2.14331324798476 |
| 21.5199995189905 | 3.08240188235165 |
| 21.5224995189346 | 2.14618567185181 |
| 21.5249995188788 | 3.05736933324877 |
| 21.5274995188229 | 2.14701902844060 |
| 21.5299995187670 | 3.03471729190084 |
| 21.5324995187111 | 2.14153215036478 |
| 21.5349995186552 | 2.99196946498606 |
| 21.5374995185994 | 2.11448165724983 |
| 21.5399995185435 | 2.98188252848934 |
| 21.5424995184876 | 2.08662179232222 |
| 21.5449995184317 | 2.98198027514150 |
| 21.5474995183758 | 2.07024103866192 |
| 21.5499995183200 | 2.99762722012494 |
| 21.5524995182641 | 2.07586301537601 |
| 21.5549995182082 | 2.99368482327532 |
| 21.5574995181523 | 2.08173881031915 |
| 21.5599995180964 | 3.00508584653251 |
| 21.5624995180406 | 2.08729426207279 |
| 21.5649995179847 | 3.03027680919648 |
| 21.5674995179288 | 2.10659523609758 |
| 21.5699995178729 | 3.06262847604505 |
| 21.5724995178171 | 2.14269448061197 |
| 21.5749995177612 | 3.08988322501515 |
| 21.5774995177053 | 2.17117803184262 |
| 21.5799995176494 | 3.11807673186565 |
| 21.5824995175935 | 2.17354562192124 |
| 21.5849995175377 | 3.15979259571969 |
| 21.5874995174818 | 2.17362389471592 |
| 21.5899995174259 | 3.18095829933214 |
| 21.5924995173700 | 2.18963727499808 |

|                  |                  |
|------------------|------------------|
| 21.5949995173141 | 3.18087602361834 |
| 21.5974995172583 | 2.21147828823753 |
| 21.5999995172024 | 3.15267546866055 |
| 21.6024995171465 | 2.20218633767399 |
| 21.6049995170906 | 3.14667405651396 |
| 21.6074995170347 | 2.16268561323762 |
| 21.6099995169789 | 3.13818289561746 |
| 21.6124995169230 | 2.11996040911358 |
| 21.6149995168671 | 3.12641316668799 |
| 21.6174995168112 | 2.10094577128112 |
| 21.6199995167553 | 3.08981322909800 |
| 21.6224995166995 | 2.09177787608771 |
| 21.6249995166436 | 3.06551697277931 |
| 21.6274995165877 | 2.08366591008756 |
| 21.6299995165318 | 3.04228901525841 |
| 21.6324995164759 | 2.07871940829276 |
| 21.6349995164201 | 3.01946190222844 |
| 21.6374995163642 | 2.09045627498018 |
| 21.6399995163083 | 2.99321346410609 |
| 21.6424995162524 | 2.10655792005086 |
| 21.6449995161965 | 2.99165147649605 |
| 21.6474995161407 | 2.12429331670299 |
| 21.6499995160848 | 3.01060065682232 |
| 21.6524995160289 | 2.13934607450501 |
| 21.6549995159730 | 3.02445162972067 |
| 21.6574995159172 | 2.15585190718426 |
| 21.6599995158613 | 3.01812877533580 |
| 21.6624995158054 | 2.16202630876361 |
| 21.6649995157495 | 3.01284075472601 |
| 21.6674995156936 | 2.15935138357100 |
| 21.6699995156378 | 3.03009594859437 |
| 21.6724995155819 | 2.14811140874141 |
| 21.6749995155260 | 3.04823717885895 |
| 21.6774995154701 | 2.12883320872749 |
| 21.6799995154142 | 3.06423504597249 |
| 21.6824995153584 | 2.09800539314035 |
| 21.6849995153025 | 3.08322536739840 |
| 21.6874995152466 | 2.07442988793066 |
| 21.6899995151907 | 3.11778109035481 |
| 21.6924995151348 | 2.08688037627963 |
| 21.6949995150790 | 3.13103286374800 |
| 21.6974995150231 | 2.12643444706203 |
| 21.6999995149672 | 3.13292881702266 |
| 21.7024995149113 | 2.15683666092382 |
| 21.7049995148554 | 3.13316389892470 |
| 21.7074995147996 | 2.16179886011673 |
| 21.7099995147437 | 3.15433271033257 |
| 21.7124995146878 | 2.17053266791242 |
| 21.7149995146319 | 3.17087007877932 |
| 21.7174995145760 | 2.19381606440308 |
| 21.7199995145202 | 3.16590588565516 |
| 21.7224995144643 | 2.21682710130402 |

|                  |                  |
|------------------|------------------|
| 21.7249995144084 | 3.14189970904833 |
| 21.7274995143525 | 2.20969897750938 |
| 21.7299995142967 | 3.12085688541689 |
| 21.7324995142408 | 2.18159125469576 |
| 21.7349995141849 | 3.09347969068798 |
| 21.7374995141290 | 2.15051195723623 |
| 21.7399995140731 | 3.05170415486003 |
| 21.7424995140173 | 2.12588553542142 |
| 21.7449995139614 | 3.01641900457562 |
| 21.7474995139055 | 2.08730373300150 |
| 21.7499995138496 | 3.00503171914940 |
| 21.7524995137937 | 2.04325931162396 |
| 21.7549995137379 | 3.01069326886234 |
| 21.7574995136820 | 2.02559171973179 |
| 21.7599995136261 | 3.00206127041488 |
| 21.7624995135702 | 2.05294984993667 |
| 21.7649995135143 | 2.98679325244668 |
| 21.7674995134585 | 2.09945773703473 |
| 21.7699995134026 | 2.99286180891985 |
| 21.7724995133467 | 2.14358679543097 |
| 21.7749995132908 | 3.02717352865325 |
| 21.7774995132349 | 2.17643412523007 |
| 21.7799995131791 | 3.05881967663967 |
| 21.7824995131232 | 2.20134011485027 |
| 21.7849995130673 | 3.07731013459888 |
| 21.7874995130114 | 2.21192014674264 |
| 21.7899995129555 | 3.10896502161813 |
| 21.7924995128997 | 2.21168837881357 |
| 21.7949995128438 | 3.13666620666752 |
| 21.7974995127879 | 2.20619892645337 |
| 21.7999995127320 | 3.15028544042298 |
| 21.8024995126761 | 2.19286014672231 |
| 21.8049995126203 | 3.13471158211485 |
| 21.8074995125644 | 2.15824608835485 |
| 21.8099995125085 | 3.12796132839442 |
| 21.8124995124526 | 2.11147070519295 |
| 21.8149995123968 | 3.13886775728478 |
| 21.8174995123409 | 2.08516138240305 |
| 21.8199995122850 | 3.15577659491543 |
| 21.8224995122291 | 2.09004226149640 |
| 21.8249995121732 | 3.14537569339117 |
| 21.8274995121174 | 2.10413569427307 |
| 21.8299995120615 | 3.12634499351783 |
| 21.8324995120056 | 2.11073460949073 |
| 21.8349995119497 | 3.12463140704900 |
| 21.8374995118938 | 2.13691021158447 |
| 21.8399995118380 | 3.12260063914696 |
| 21.8424995117821 | 2.18447364404220 |
| 21.8449995117262 | 3.10729359714527 |
| 21.8474995116703 | 2.22960817456027 |
| 21.8499995116144 | 3.07924670341400 |
| 21.8524995115586 | 2.23338345881087 |

|                  |                  |
|------------------|------------------|
| 21.8549995115027 | 3.07998942459564 |
| 21.8574995114468 | 2.21248766286097 |
| 21.8599995113909 | 3.07646456080401 |
| 21.8624995113350 | 2.19172097586098 |
| 21.8649995112792 | 3.06346183637956 |
| 21.8674995112233 | 2.18138774572289 |
| 21.8699995111674 | 3.02153230768331 |
| 21.8724995111115 | 2.15208549166082 |
| 21.8749995110556 | 3.00863497510565 |
| 21.8774995109998 | 2.09931257325368 |
| 21.8799995109439 | 3.01446820230783 |
| 21.8824995108880 | 2.05210146380192 |
| 21.8849995108321 | 3.02496869568216 |
| 21.8874995107763 | 2.04473648427713 |
| 21.8899995107204 | 3.02147203543538 |
| 21.8924995106645 | 2.06874078258635 |
| 21.8949995106086 | 3.04041354182453 |
| 21.8974995105527 | 2.10263876944876 |
| 21.8999995104969 | 3.07815543920414 |
| 21.9024995104410 | 2.14296834519155 |
| 21.9049995103851 | 3.10800133433707 |
| 21.9074995103292 | 2.18934759965201 |
| 21.9099995102733 | 3.12005672731138 |
| 21.9124995102175 | 2.23134608201126 |
| 21.9149995101616 | 3.14282980379084 |
| 21.9174995101057 | 2.25988559392860 |
| 21.9199995100498 | 3.18521513964975 |
| 21.9224995099939 | 2.28016619961133 |
| 21.9249995099381 | 3.20730986968082 |
| 21.9274995098822 | 2.28816526301882 |
| 21.9299995098263 | 3.20751924206387 |
| 21.9324995097704 | 2.27691025433569 |
| 21.9349995097145 | 3.19027725384002 |
| 21.9374995096587 | 2.24553763637842 |
| 21.9399995096028 | 3.19887143427272 |
| 21.9424995095469 | 2.21629972491313 |
| 21.9449995094910 | 3.19205429436546 |
| 21.9474995094351 | 2.19199415229466 |
| 21.9499995093793 | 3.17483105953388 |
| 21.9524995093234 | 2.16409299168797 |
| 21.9549995092675 | 3.14049202962927 |
| 21.9574995092116 | 2.12332201686320 |
| 21.9599995091558 | 3.13816082648245 |
| 21.9624995090999 | 2.10476930599579 |
| 21.9649995090440 | 3.12258015735930 |
| 21.9674995089881 | 2.12318532940509 |
| 21.9699995089322 | 3.09421109235294 |
| 21.9724995088764 | 2.15883653572243 |
| 21.9749995088205 | 3.05463442423623 |
| 21.9774995087646 | 2.17327465867455 |
| 21.9799995087087 | 3.04734836826675 |
| 21.9824995086528 | 2.17925592316093 |

|                  |                  |
|------------------|------------------|
| 21.9849995085970 | 3.05595771495926 |
| 21.9874995085411 | 2.19677452301004 |
| 21.9899995084852 | 3.05329062420006 |
| 21.9924995084293 | 2.22274699132605 |
| 21.9949995083734 | 3.04286548811971 |
| 21.9974995083176 | 2.23215866674594 |
| 21.9999995082617 | 3.03648268619154 |
| 22.0024995082058 | 2.21743339287429 |
| 22.0049995081499 | 3.05332422657765 |
| 22.0074995080940 | 2.19860577394539 |
| 22.0099995080382 | 3.04950139196738 |
| 22.0124995079823 | 2.18197676952299 |
| 22.0149995079264 | 3.05260164755295 |
| 22.0174995078705 | 2.16086565984353 |
| 22.0199995078146 | 3.06335526597373 |
| 22.0224995077588 | 2.12605836164039 |
| 22.0249995077029 | 3.10710095050515 |
| 22.0274995076470 | 2.10612140299936 |
| 22.0299995075911 | 3.12345535590202 |
| 22.0324995075352 | 2.11428917255209 |
| 22.0349995074794 | 3.12399412417965 |
| 22.0374995074235 | 2.14037966417947 |
| 22.0399995073676 | 3.11904180113284 |
| 22.0424995073117 | 2.16322982883951 |
| 22.0449995072559 | 3.14328160411042 |
| 22.0474995072000 | 2.18739740530270 |
| 22.0499995071441 | 3.16633889278785 |
| 22.0524995070882 | 2.21209643995509 |
| 22.0549995070323 | 3.16833283575669 |
| 22.0574995069765 | 2.23103641439242 |
| 22.0599995069206 | 3.16990550063878 |
| 22.0624995068647 | 2.23872851140821 |
| 22.0649995068088 | 3.17899789318332 |
| 22.0674995067529 | 2.24692154949144 |
| 22.0699995066971 | 3.17695848814837 |
| 22.0724995066412 | 2.25469964045147 |
| 22.0749995065853 | 3.14239946459421 |
| 22.0774995065294 | 2.24629211791454 |
| 22.0799995064735 | 3.10258914971818 |
| 22.0824995064177 | 2.20811919957257 |
| 22.0849995063618 | 3.08282059548589 |
| 22.0874995063059 | 2.15987765537426 |
| 22.0899995062500 | 3.08472025273038 |
| 22.0924995061941 | 2.12349487117464 |
| 22.0949995061383 | 3.06722873265184 |
| 22.0974995060824 | 2.10091605581518 |
| 22.0999995060265 | 3.03404435185068 |
| 22.1024995059706 | 2.07665675695744 |
| 22.1049995059147 | 3.01065096056069 |
| 22.1074995058589 | 2.06217835518294 |
| 22.1099995058030 | 3.00961660770870 |
| 22.1124995057471 | 2.08170599559832 |

|                  |                  |
|------------------|------------------|
| 22.1149995056912 | 3.00352632117133 |
| 22.1174995056354 | 2.12170953586347 |
| 22.1199995055795 | 2.99520031669770 |
| 22.1224995055236 | 2.14777123967591 |
| 22.1249995054677 | 3.01858324927606 |
| 22.1274995054118 | 2.15174617786694 |
| 22.1299995053560 | 3.06794698982577 |
| 22.1324995053001 | 2.16789716686401 |
| 22.1349995052442 | 3.09701794743088 |
| 22.1374995051883 | 2.20102143914093 |
| 22.1399995051324 | 3.09424847875490 |
| 22.1424995050766 | 2.22586252037227 |
| 22.1449995050207 | 3.09135449727559 |
| 22.1474995049648 | 2.21270874880383 |
| 22.1499995049089 | 3.11482513543634 |
| 22.1524995048530 | 2.18198559957737 |
| 22.1549995047972 | 3.13692420570501 |
| 22.1574995047413 | 2.15616277650297 |
| 22.1599995046854 | 3.13526369815204 |
| 22.1624995046295 | 2.13991746968662 |
| 22.1649995045736 | 3.13300737830060 |
| 22.1674995045178 | 2.11744597028094 |
| 22.1699995044619 | 3.14470157964695 |
| 22.1724995044060 | 2.09930508213194 |
| 22.1749995043501 | 3.14572373476709 |
| 22.1774995042942 | 2.10287642700683 |
| 22.1799995042384 | 3.12088358418958 |
| 22.1824995041825 | 2.12375503550621 |
| 22.1849995041266 | 3.09283248320080 |
| 22.1874995040707 | 2.14113194832126 |
| 22.1899995040148 | 3.09676052570440 |
| 22.1924995039590 | 2.15292735921559 |
| 22.1949995039031 | 3.10791920544245 |
| 22.1974995038472 | 2.16380242373975 |
| 22.1999995037913 | 3.10966231120664 |
| 22.2024995037355 | 2.17420981536879 |
| 22.2049995036796 | 3.08531119222648 |
| 22.2074995036237 | 2.17762045297660 |
| 22.2099995035678 | 3.07063958215304 |
| 22.2124995035119 | 2.17858516101001 |
| 22.2149995034561 | 3.05273508689290 |
| 22.2174995034002 | 2.17599753311671 |
| 22.2199995033443 | 3.03625183849693 |
| 22.2224995032884 | 2.15542146019125 |
| 22.2249995032325 | 3.01243547688262 |
| 22.2274995031767 | 2.11097745167517 |
| 22.2299995031208 | 3.01594675362066 |
| 22.2324995030649 | 2.06698168376476 |
| 22.2349995030090 | 3.03270533627140 |
| 22.2374995029531 | 2.05989002275874 |
| 22.2399995028973 | 3.03673758969161 |
| 22.2424995028414 | 2.08268781080939 |



|                  |                  |
|------------------|------------------|
| 22.2449995027855 | 3.03122387620083 |
| 22.2474995027296 | 2.10405393479112 |
| 22.2499995026737 | 3.03441184573568 |
| 22.2524995026179 | 2.11198540370193 |
| 22.2549995025620 | 3.06639150103407 |
| 22.2574995025061 | 2.13350203866554 |
| 22.2599995024502 | 3.09189016210489 |
| 22.2624995023943 | 2.16719726351456 |
| 22.2649995023385 | 3.12009206279655 |
| 22.2674995022826 | 2.19678467003414 |
| 22.2699995022267 | 3.13555645512914 |
| 22.2724995021708 | 2.20050349164117 |
| 22.2749995021150 | 3.16818969861544 |
| 22.2774995020591 | 2.19600597324097 |
| 22.2799995020032 | 3.16619020274067 |
| 22.2824995019473 | 2.19390641326288 |
| 22.2849995018914 | 3.15520127074169 |
| 22.2874995018356 | 2.19213028073265 |
| 22.2899995017797 | 3.13208263347154 |
| 22.2924995017238 | 2.16771359478368 |
| 22.2949995016679 | 3.13746142596240 |
| 22.2974995016120 | 2.12661731819832 |
| 22.2999995015562 | 3.13466481454605 |
| 22.3024995015003 | 2.09223546544145 |
| 22.3049995014444 | 3.11774844264559 |
| 22.3074995013885 | 2.08147388697985 |
| 22.3099995013326 | 3.08640190285468 |
| 22.3124995012768 | 2.08790260860918 |
| 22.3149995012209 | 3.06714814870801 |
| 22.3174995011650 | 2.10375055651021 |
| 22.3199995011091 | 3.06145175498700 |
| 22.3224995010532 | 2.12490815367771 |
| 22.3249995009974 | 3.04157378259578 |
| 22.3274995009415 | 2.13757905771108 |
| 22.3299995008856 | 3.02994880457921 |
| 22.3324995008297 | 2.14040862059070 |
| 22.3349995007738 | 3.03709563338842 |
| 22.3374995007180 | 2.14397616805924 |
| 22.3399995006621 | 3.06056411520670 |
| 22.3424995006062 | 2.16238312750678 |
| 22.3449995005503 | 3.04609298486389 |
| 22.3474995004945 | 2.17224210918327 |
| 22.3499995004386 | 3.02973543874230 |
| 22.3524995003827 | 2.15594310171906 |
| 22.3549995003268 | 3.01872893091082 |
| 22.3574995002709 | 2.11993759104578 |
| 22.3599995002151 | 3.04586642416554 |
| 22.3624995001592 | 2.09973723918280 |
| 22.3649995001033 | 3.05973866694020 |
| 22.3674995000474 | 2.09483286479137 |
| 22.3699994999915 | 3.07164757653576 |
| 22.3724994999357 | 2.09106448409680 |

|                  |                  |
|------------------|------------------|
| 22.3749994998798 | 3.07989528721871 |
| 22.3774994998239 | 2.08458266993588 |
| 22.3799994997680 | 3.10871021241431 |
| 22.3824994997121 | 2.10521074793024 |
| 22.3849994996563 | 3.11961205855311 |
| 22.3874994996004 | 2.14779069575832 |
| 22.3899994995445 | 3.11775002218026 |
| 22.3924994994886 | 2.18314458407431 |
| 22.3949994994327 | 3.12484415693631 |
| 22.3974994993769 | 2.18714352801731 |
| 22.3999994993210 | 3.15219209151187 |
| 22.4024994992651 | 2.18251421235075 |
| 22.4049994992092 | 3.17039518056945 |
| 22.4074994991533 | 2.18818168671731 |
| 22.4099994990975 | 3.15588991405166 |
| 22.4124994990416 | 2.19604164541704 |
| 22.4149994989857 | 3.12928011704433 |
| 22.4174994989298 | 2.18506780426832 |
| 22.4199994988739 | 3.10211452884142 |
| 22.4224994988181 | 2.15526129305428 |
| 22.4249994987622 | 3.08582705773250 |
| 22.4274994987063 | 2.12252290130731 |
| 22.4299994986504 | 3.05137415461723 |
| 22.4324994985946 | 2.09101474185095 |
| 22.4349994985387 | 3.03417379370415 |
| 22.4374994984828 | 2.06641274453314 |
| 22.4399994984269 | 3.02791919782612 |
| 22.4424994983710 | 2.05668874577803 |
| 22.4449994983152 | 3.03023514585304 |
| 22.4474994982593 | 2.07443581564217 |
| 22.4499994982034 | 3.00862446207997 |
| 22.4524994981475 | 2.10391072653808 |
| 22.4549994980916 | 2.99591675645853 |
| 22.4574994980358 | 2.13378957570282 |
| 22.4599994979799 | 3.00354226462589 |
| 22.4624994979240 | 2.15347420823515 |
| 22.4649994978681 | 3.02982812656576 |
| 22.4674994978122 | 2.16899375068671 |
| 22.4699994977564 | 3.05238083096032 |
| 22.4724994977005 | 2.17298732465148 |
| 22.4749994976446 | 3.07037712092521 |
| 22.4774994975887 | 2.16923440984809 |
| 22.4799994975328 | 3.08363009214432 |
| 22.4824994974770 | 2.16081609948579 |
| 22.4849994974211 | 3.09130361789747 |
| 22.4874994973652 | 2.15570565879180 |
| 22.4899994973093 | 3.09456419932468 |
| 22.4924994972534 | 2.14216674007977 |
| 22.4949994971976 | 3.08883807669259 |
| 22.4974994971417 | 2.11421933051257 |
| 22.4999994970858 | 3.09868800929071 |
| 22.5024994970299 | 2.08430511948203 |

|                  |                  |
|------------------|------------------|
| 22.5049994969741 | 3.11752140164635 |
| 22.5074994969182 | 2.08363590964328 |
| 22.5099994968623 | 3.12850286331897 |
| 22.5124994968064 | 2.11186266149198 |
| 22.5149994967505 | 3.11830584177386 |
| 22.5174994966947 | 2.14216042520536 |
| 22.5199994966388 | 3.10558992201176 |
| 22.5224994965829 | 2.15647767141976 |
| 22.5249994965270 | 3.10348635835587 |
| 22.5274994964711 | 2.17138662569820 |
| 22.5299994964153 | 3.09887367774616 |
| 22.5324994963594 | 2.19051815227653 |
| 22.5349994963035 | 3.08793960054224 |
| 22.5374994962476 | 2.19841983699816 |
| 22.5399994961917 | 3.07328424288431 |
| 22.5424994961359 | 2.18023354397482 |
| 22.5449994960800 | 3.06779842147997 |
| 22.5474994960241 | 2.14923965326554 |
| 22.5499994959682 | 3.05248174579636 |
| 22.5524994959123 | 2.12642384619365 |
| 22.5549994958565 | 3.02110101364536 |
| 22.5574994958006 | 2.11094227821843 |
| 22.5599994957447 | 2.99093289215840 |
| 22.5624994956888 | 2.09106252213199 |
| 22.5649994956329 | 2.99124624869334 |
| 22.5674994955771 | 2.06217326016754 |
| 22.5699994955212 | 3.00669755630825 |
| 22.5724994954653 | 2.04902927310129 |
| 22.5749994954094 | 3.01806937168979 |
| 22.5774994953535 | 2.06419367900859 |
| 22.5799994952977 | 3.02877758657878 |
| 22.5824994952418 | 2.10600920276194 |
| 22.5849994951859 | 3.04400273252768 |
| 22.5874994951300 | 2.15202277092460 |
| 22.5899994950742 | 3.07104841713282 |
| 22.5924994950183 | 2.19175237434387 |
| 22.5949994949624 | 3.08568954121052 |
| 22.5974994949065 | 2.20820887068773 |
| 22.5999994948506 | 3.10268814330751 |
| 22.6024994947948 | 2.20786386013359 |
| 22.6049994947389 | 3.12456019842953 |
| 22.6074994946830 | 2.19882475218672 |
| 22.6099994946271 | 3.15335811870932 |
| 22.6124994945712 | 2.19537311101075 |
| 22.6149994945154 | 3.14887300225430 |
| 22.6174994944595 | 2.18060005038728 |
| 22.6199994944036 | 3.13140895305755 |
| 22.6224994943477 | 2.14360825899393 |
| 22.6249994942918 | 3.11241395306344 |
| 22.6274994942360 | 2.09923208285435 |
| 22.6299994941801 | 3.11062621646350 |
| 22.6324994941242 | 2.08206697001153 |

|                  |                  |
|------------------|------------------|
| 22.6349994940683 | 3.09619521935940 |
| 22.6374994940124 | 2.08594557830879 |
| 22.6399994939566 | 3.08296980715316 |
| 22.6424994939007 | 2.08744525949257 |
| 22.6449994938448 | 3.07467821820528 |
| 22.6474994937889 | 2.08731153727013 |
| 22.6499994937330 | 3.07699079228148 |
| 22.6524994936772 | 2.11300956768563 |
| 22.6549994936213 | 3.06452992095770 |
| 22.6574994935654 | 2.16038092725334 |
| 22.6599994935095 | 3.04030673317052 |
| 22.6624994934537 | 2.19719706370685 |
| 22.6649994933978 | 3.03131199270102 |
| 22.6674994933419 | 2.20271590945655 |
| 22.6699994932860 | 3.03571313099245 |
| 22.6724994932301 | 2.18323444458377 |
| 22.6749994931743 | 3.04685379352768 |
| 22.6774994931184 | 2.16131232957942 |
| 22.6799994930625 | 3.03507770047671 |
| 22.6824994930066 | 2.13950644821697 |
| 22.6849994929507 | 3.03272380128277 |
| 22.6874994928949 | 2.11773841840630 |
| 22.6899994928390 | 3.02452575657474 |
| 22.6924994927831 | 2.08846092300957 |
| 22.6949994927272 | 3.03290813101650 |
| 22.6974994926713 | 2.06615301848847 |
| 22.6999994926155 | 3.02792041342883 |
| 22.7024994925596 | 2.05560057109279 |
| 22.7049994925037 | 3.04796233250249 |
| 22.7074994924478 | 2.06867163808687 |
| 22.7099994923919 | 3.07715602191992 |
| 22.7124994923361 | 2.10009535681526 |
| 22.7149994922802 | 3.11684628812186 |
| 22.7174994922243 | 2.14744874826502 |
| 22.7199994921684 | 3.12706848790189 |
| 22.7224994921125 | 2.18890525087451 |
| 22.7249994920567 | 3.13393706690004 |
| 22.7274994920008 | 2.21794589071893 |
| 22.7299994919449 | 3.14524612771242 |
| 22.7324994918890 | 2.23334623067674 |
| 22.7349994918332 | 3.15949852879013 |
| 22.7374994917773 | 2.24020060869490 |
| 22.7399994917214 | 3.16165383390576 |
| 22.7424994916655 | 2.22559546392084 |
| 22.7449994916096 | 3.14793571926255 |
| 22.7474994915538 | 2.18565379674367 |
| 22.7499994914979 | 3.13846961356311 |
| 22.7524994914420 | 2.13855348201208 |
| 22.7549994913861 | 3.11390510397298 |
| 22.7574994913302 | 2.10661974802953 |
| 22.7599994912744 | 3.08609908010031 |
| 22.7624994912185 | 2.08687415628087 |

|                  |                  |
|------------------|------------------|
| 22.7649994911626 | 3.04161753378396 |
| 22.7674994911067 | 2.06022794382199 |
| 22.7699994910508 | 3.02458889121778 |
| 22.7724994909950 | 2.03757632723096 |
| 22.7749994909391 | 3.02029184213314 |
| 22.7774994908832 | 2.04723064885494 |
| 22.7799994908273 | 3.02981084142921 |
| 22.7824994907714 | 2.09303495600742 |
| 22.7849994907156 | 3.02293977700086 |
| 22.7874994906597 | 2.14335695290962 |
| 22.7899994906038 | 3.02941548392194 |
| 22.7924994905479 | 2.17986639580342 |
| 22.7949994904920 | 3.03565248453294 |
| 22.7974994904362 | 2.20157678472816 |
| 22.7999994903803 | 3.04905359928241 |
| 22.8024994903244 | 2.21511418936135 |
| 22.8049994902685 | 3.05462717580869 |
| 22.8074994902126 | 2.20778558807960 |
| 22.8099994901568 | 3.07248402600404 |
| 22.8124994901009 | 2.17776396104215 |
| 22.8149994900450 | 3.09606572399005 |
| 22.8174994899891 | 2.13503684420761 |
| 22.8199994899333 | 3.10909477307881 |
| 22.8224994898774 | 2.10262114487465 |
| 22.8249994898215 | 3.09946999134126 |
| 22.8274994897656 | 2.08416082512579 |
| 22.8299994897097 | 3.08632939274148 |
| 22.8324994896539 | 2.07709105953831 |
| 22.8349994895980 | 3.10040348688247 |
| 22.8374994895421 | 2.07687223057438 |
| 22.8399994894862 | 3.11532899420061 |
| 22.8424994894303 | 2.08862518515266 |
| 22.8449994893745 | 3.12390750645982 |
| 22.8474994893186 | 2.11068025672910 |
| 22.8499994892627 | 3.13170597195363 |
| 22.8524994892068 | 2.14585746279151 |
| 22.8549994891509 | 3.14638882056700 |
| 22.8574994890951 | 2.19058052010146 |
| 22.8599994890392 | 3.14376013642167 |
| 22.8624994889833 | 2.23118641264642 |
| 22.8649994889274 | 3.12104778257255 |
| 22.8674994888715 | 2.24210131266631 |
| 22.8699994888157 | 3.09192375457950 |
| 22.8724994887598 | 2.21790680170696 |
| 22.8749994887039 | 3.08600522866067 |
| 22.8774994886480 | 2.17746452206000 |
| 22.8799994885921 | 3.08249664160693 |
| 22.8824994885363 | 2.14120513414409 |
| 22.8849994884804 | 3.06058376336770 |
| 22.8874994884245 | 2.10646015332026 |
| 22.8899994883686 | 3.02254094940449 |
| 22.8924994883128 | 2.05948839733780 |

|                  |                  |
|------------------|------------------|
| 22.8949994882569 | 3.00222669107098 |
| 22.8974994882010 | 2.02217596031033 |
| 22.8999994881451 | 2.99676434355223 |
| 22.9024994880892 | 2.02662599066379 |
| 22.9049994880334 | 2.99103227254990 |
| 22.9074994879775 | 2.06523347486380 |
| 22.9099994879216 | 2.99994520924783 |
| 22.9124994878657 | 2.09871788329566 |
| 22.9149994878098 | 3.03815816782109 |
| 22.9174994877540 | 2.12526959212331 |
| 22.9199994876981 | 3.08560047010011 |
| 22.9224994876422 | 2.16529098981753 |
| 22.9249994875863 | 3.11256439084142 |
| 22.9274994875304 | 2.21775558447837 |
| 22.9299994874746 | 3.11351313309981 |
| 22.9324994874187 | 2.24995547530412 |
| 22.9349994873628 | 3.12343400216140 |
| 22.9374994873069 | 2.24608197308246 |
| 22.9399994872510 | 3.14353477152870 |
| 22.9424994871952 | 2.21436608886652 |
| 22.9449994871393 | 3.15575260633815 |
| 22.9474994870834 | 2.17498560774755 |
| 22.9499994870275 | 3.14679418671765 |
| 22.9524994869716 | 2.13167481633503 |
| 22.9549994869158 | 3.14294441585943 |
| 22.9574994868599 | 2.09382860421024 |
| 22.9599994868040 | 3.13157726188482 |
| 22.9624994867481 | 2.07041686570289 |
| 22.9649994866922 | 3.11307672195242 |
| 22.9674994866364 | 2.06609690259000 |
| 22.9699994865805 | 3.07425367894079 |
| 22.9724994865246 | 2.06930822773916 |
| 22.9749994864687 | 3.05732372454145 |
| 22.9774994864129 | 2.08369798585352 |
| 22.9799994863570 | 3.06000230780272 |
| 22.9824994863011 | 2.11156574360307 |
| 22.9849994862452 | 3.07553283371288 |
| 22.9874994861893 | 2.14993505815059 |
| 22.9899994861335 | 3.06776756982500 |
| 22.9924994860776 | 2.18019272396066 |
| 22.9949994860217 | 3.05137345075050 |
| 22.9974994859658 | 2.19306949104332 |
| 22.9999994859099 | 3.04515970177756 |
| 23.0024994858541 | 2.19478307601025 |
| 23.0049994857982 | 3.03708305718102 |
| 23.0074994857423 | 2.18604548248521 |
| 23.0099994856864 | 3.02819284277422 |
| 23.0124994856305 | 2.15739981914920 |
| 23.0149994855747 | 3.01415565987824 |
| 23.0174994855188 | 2.10076709383644 |
| 23.0199994854629 | 3.03355871549324 |
| 23.0224994854070 | 2.05018189879679 |



|                  |                  |
|------------------|------------------|
| 23.0249994853511 | 3.04744551061147 |
| 23.0274994852953 | 2.03942917585191 |
| 23.0299994852394 | 3.05582815442001 |
| 23.0324994851835 | 2.06685817252781 |
| 23.0349994851276 | 3.04214762238439 |
| 23.0374994850717 | 2.08950641377838 |
| 23.0399994850159 | 3.06525819114883 |
| 23.0424994849600 | 2.10439949424485 |
| 23.0449994849041 | 3.09718034629742 |
| 23.0474994848482 | 2.13373609353312 |
| 23.0499994847924 | 3.12922103480419 |
| 23.0524994847365 | 2.18098036344347 |
| 23.0549994846806 | 3.13657923617832 |
| 23.0574994846247 | 2.21425789176622 |
| 23.0599994845688 | 3.15748185673236 |
| 23.0624994845130 | 2.21924880566781 |
| 23.0649994844571 | 3.16932597530043 |
| 23.0674994844012 | 2.21090195364358 |
| 23.0699994843453 | 3.16216019395428 |
| 23.0724994842894 | 2.20254884885602 |
| 23.0749994842336 | 3.12880041589632 |
| 23.0774994841777 | 2.18218512864835 |
| 23.0799994841218 | 3.10107438510785 |
| 23.0824994840659 | 2.13780645239110 |
| 23.0849994840100 | 3.09724131587208 |
| 23.0874994839542 | 2.08326687253506 |
| 23.0899994838983 | 3.08412775507647 |
| 23.0924994838424 | 2.04763324923630 |
| 23.0949994837865 | 3.05527403240266 |
| 23.0974994837306 | 2.04086975068719 |
| 23.0999994836748 | 3.01918792393882 |
| 23.1024994836189 | 2.05541767694063 |
| 23.1049994835630 | 3.01729002181113 |
| 23.1074994835071 | 2.08704353557778 |
| 23.1099994834512 | 3.01476130957013 |
| 23.1124994833954 | 2.12322164629532 |
| 23.1149994833395 | 3.01218873514709 |
| 23.1174994832836 | 2.14869889235719 |
| 23.1199994832277 | 3.00762413758136 |
| 23.1224994831719 | 2.15921033448689 |
| 23.1249994831160 | 3.04239823146198 |
| 23.1274994830601 | 2.17191161559604 |
| 23.1299994830042 | 3.05663391460296 |
| 23.1324994829483 | 2.18486193233554 |
| 23.1349994828925 | 3.06112330015127 |
| 23.1374994828366 | 2.17989094144570 |
| 23.1399994827807 | 3.04013791247979 |
| 23.1424994827248 | 2.14084170198616 |
| 23.1449994826689 | 3.05137211522866 |
| 23.1474994826131 | 2.09618819031617 |
| 23.1499994825572 | 3.06817913898684 |
| 23.1524994825013 | 2.07512887974723 |

|                  |                  |
|------------------|------------------|
| 23.1549994824454 | 3.07631874474444 |
| 23.1574994823895 | 2.07610660142055 |
| 23.1599994823337 | 3.07358291347102 |
| 23.1624994822778 | 2.06968661081092 |
| 23.1649994822219 | 3.08986587738659 |
| 23.1674994821660 | 2.06736879044330 |
| 23.1699994821101 | 3.11577060174157 |
| 23.1724994820543 | 2.10207901107713 |
| 23.1749994819984 | 3.11616418149157 |
| 23.1774994819425 | 2.16282622051842 |
| 23.1799994818866 | 3.10818255235258 |
| 23.1824994818307 | 2.20761642690233 |
| 23.1849994817749 | 3.10631599261585 |
| 23.1874994817190 | 2.21339867121628 |
| 23.1899994816631 | 3.12790815398327 |
| 23.1924994816072 | 2.20173324671224 |
| 23.1949994815513 | 3.12564937270785 |
| 23.1974994814955 | 2.19074186648199 |
| 23.1999994814396 | 3.10629650604671 |
| 23.2024994813837 | 2.17678639700385 |
| 23.2049994813278 | 3.06663006441713 |
| 23.2074994812720 | 2.14267036555346 |
| 23.2099994812161 | 3.05112981061541 |
| 23.2124994811602 | 2.09672112030999 |
| 23.2149994811043 | 3.02673886166233 |
| 23.2174994810484 | 2.05553985361510 |
| 23.2199994809926 | 2.99794102673652 |
| 23.2224994809367 | 2.03006374159655 |
| 23.2249994808808 | 2.97978271653505 |
| 23.2274994808249 | 2.02370689168886 |
| 23.2299994807690 | 2.99676372722926 |
| 23.2324994807132 | 2.04577314783482 |
| 23.2349994806573 | 3.02036809368130 |
| 23.2374994806014 | 2.09403893325936 |
| 23.2399994805455 | 3.02921277050408 |
| 23.2424994804896 | 2.14462171674284 |
| 23.2449994804338 | 3.03418722309402 |
| 23.2474994803779 | 2.17930556052588 |
| 23.2499994803220 | 3.06256833273937 |
| 23.2524994802661 | 2.20206052413665 |
| 23.2549994802102 | 3.10177756398456 |
| 23.2574994801544 | 2.21861935194841 |
| 23.2599994800985 | 3.12198979940966 |
| 23.2624994800426 | 2.21734865471062 |
| 23.2649994799867 | 3.12056152789894 |
| 23.2674994799308 | 2.18388452324636 |
| 23.2699994798750 | 3.12663513074711 |
| 23.2724994798191 | 2.13546752465145 |
| 23.2749994797632 | 3.13712599021796 |
| 23.2774994797073 | 2.10485088716731 |
| 23.2799994796515 | 3.12540259526705 |
| 23.2824994795956 | 2.09311379369446 |

|                  |                  |
|------------------|------------------|
| 23.2849994795397 | 3.09390950008125 |
| 23.2874994794838 | 2.07145439235794 |
| 23.2899994794279 | 3.08065058023529 |
| 23.2924994793721 | 2.04255176996545 |
| 23.2949994793162 | 3.09269554059513 |
| 23.2974994792603 | 2.04965849898489 |
| 23.2999994792044 | 3.09489372583389 |
| 23.3024994791485 | 2.09716155067963 |
| 23.3049994790927 | 3.07302784480730 |
| 23.3074994790368 | 2.14350352500387 |
| 23.3099994789809 | 3.06313204309266 |
| 23.3124994789250 | 2.16060615707028 |
| 23.3149994788691 | 3.07662113732062 |
| 23.3174994788133 | 2.16860673984865 |
| 23.3199994787574 | 3.08175538558806 |
| 23.3224994787015 | 2.17698870888275 |
| 23.3249994786456 | 3.06576030704522 |
| 23.3274994785897 | 2.17107691215143 |
| 23.3299994785339 | 3.05268220978503 |
| 23.3324994784780 | 2.13534457720926 |
| 23.3349994784221 | 3.06280564940285 |
| 23.3374994783662 | 2.09031713800586 |
| 23.3399994783103 | 3.06260884593544 |
| 23.3424994782545 | 2.06401977450048 |
| 23.3449994781986 | 3.04184183336626 |
| 23.3474994781427 | 2.05394718692619 |
| 23.3499994780868 | 3.02746611264371 |
| 23.3524994780309 | 2.04790360414815 |
| 23.3549994779751 | 3.05240069073000 |
| 23.3574994779192 | 2.05039658370424 |
| 23.3599994778633 | 3.08664873744017 |
| 23.3624994778074 | 2.08092254938068 |
| 23.3649994777516 | 3.10639771397176 |
| 23.3674994776957 | 2.12675251802860 |
| 23.3699994776398 | 3.10909941157982 |
| 23.3724994775839 | 2.16883047263289 |
| 23.3749994775280 | 3.13661145310493 |
| 23.3774994774722 | 2.20069049472342 |
| 23.3799994774163 | 3.15545127684948 |
| 23.3824994773604 | 2.22532949918770 |
| 23.3849994773045 | 3.16163990284457 |
| 23.3874994772486 | 2.22831629594319 |
| 23.3899994771928 | 3.13843212496351 |
| 23.3924994771369 | 2.20020745081208 |
| 23.3949994770810 | 3.13734683459273 |
| 23.3974994770251 | 2.15557233615901 |
| 23.3999994769692 | 3.13292111585657 |
| 23.4024994769134 | 2.12038584989666 |
| 23.4049994768575 | 3.11537724086313 |
| 23.4074994768016 | 2.09462906350361 |
| 23.4099994767457 | 3.07068458386790 |
| 23.4124994766898 | 2.05996617477909 |

|                  |                  |
|------------------|------------------|
| 23.4149994766340 | 3.04151101170011 |
| 23.4174994765781 | 2.02802537107626 |
| 23.4199994765222 | 3.03805031440774 |
| 23.4224994764663 | 2.03753420820388 |
| 23.4249994764104 | 3.03412530262611 |
| 23.4274994763546 | 2.08801065615241 |
| 23.4299994762987 | 3.02401031080352 |
| 23.4324994762428 | 2.13646506616654 |
| 23.4349994761869 | 3.01816995692108 |
| 23.4374994761311 | 2.16168011608795 |
| 23.4399994760752 | 3.04405966441675 |
| 23.4424994760193 | 2.18106653305648 |
| 23.4449994759634 | 3.05039122787176 |
| 23.4474994759075 | 2.20548956017706 |
| 23.4499994758517 | 3.05392957375019 |
| 23.4524994757958 | 2.21546309006153 |
| 23.4549994757399 | 3.03982916042991 |
| 23.4574994756840 | 2.19236113351428 |
| 23.4599994756281 | 3.06324765691088 |
| 23.4624994755723 | 2.14296754085917 |
| 23.4649994755164 | 3.06879820861653 |
| 23.4674994754605 | 2.09933157273476 |
| 23.4699994754046 | 3.07052991941538 |
| 23.4724994753487 | 2.07284880355346 |
| 23.4749994752929 | 3.05538666811355 |
| 23.4774994752370 | 2.06253932002156 |
| 23.4799994751811 | 3.07174564105103 |
| 23.4824994751252 | 2.06170584727744 |
| 23.4849994750693 | 3.08806283663221 |
| 23.4874994750135 | 2.08153218502405 |
| 23.4899994749576 | 3.09659520514016 |
| 23.4924994749017 | 2.11430238377035 |
| 23.4949994748458 | 3.09753412198930 |
| 23.4974994747899 | 2.15562320561294 |
| 23.4999994747341 | 3.11545252607675 |
| 23.5024994746782 | 2.19623409390620 |
| 23.5049994746223 | 3.13064736645857 |
| 23.5074994745664 | 2.23200686704634 |
| 23.5099994745106 | 3.12152751378632 |
| 23.5124994744547 | 2.23926841596335 |
| 23.5149994743988 | 3.10419425231444 |
| 23.5174994743429 | 2.21370889507835 |
| 23.5199994742870 | 3.09584457177843 |
| 23.5224994742312 | 2.17198071879333 |
| 23.5249994741753 | 3.09801383702672 |
| 23.5274994741194 | 2.14131555856020 |
| 23.5299994740635 | 3.07003630685860 |
| 23.5324994740076 | 2.11337766095532 |
| 23.5349994739518 | 3.03837857275916 |
| 23.5374994738959 | 2.07134907731218 |
| 23.5399994738400 | 3.01130539239447 |
| 23.5424994737841 | 2.03287004276171 |

|                  |                  |
|------------------|------------------|
| 23.5449994737282 | 3.01325549250391 |
| 23.5474994736724 | 2.03693225615630 |
| 23.5499994736165 | 3.00112699583123 |
| 23.5524994735606 | 2.07778351314111 |
| 23.5549994735047 | 2.99817941680314 |
| 23.5574994734488 | 2.11381991360925 |
| 23.5599994733930 | 3.01054499805617 |
| 23.5624994733371 | 2.13572154854934 |
| 23.5649994732812 | 3.05194901776914 |
| 23.5674994732253 | 2.16282301827519 |
| 23.5699994731694 | 3.06817382235655 |
| 23.5724994731136 | 2.19966310958133 |
| 23.5749994730577 | 3.07415229819116 |
| 23.5774994730018 | 2.21817453010443 |
| 23.5799994729459 | 3.07874806733419 |
| 23.5824994728900 | 2.20565363766526 |
| 23.5849994728342 | 3.10496188302916 |
| 23.5874994727783 | 2.17079526461249 |
| 23.5899994727224 | 3.11728451716907 |
| 23.5924994726665 | 2.13995032099369 |
| 23.5949994726107 | 3.11102343272901 |
| 23.5974994725548 | 2.11157887712110 |
| 23.5999994724989 | 3.10700908326110 |
| 23.6024994724430 | 2.09101712454155 |
| 23.6049994723871 | 3.11262532968313 |
| 23.6074994723313 | 2.08136405824281 |
| 23.6099994722754 | 3.11145036359107 |
| 23.6124994722195 | 2.09362250447138 |
| 23.6149994721636 | 3.08441386431231 |
| 23.6174994721077 | 2.10986879039053 |
| 23.6199994720519 | 3.06562824749398 |
| 23.6224994719960 | 2.12817181471610 |
| 23.6249994719401 | 3.06885787928050 |
| 23.6274994718842 | 2.14265652562841 |
| 23.6299994718283 | 3.08124200149566 |
| 23.6324994717725 | 2.15957778572780 |
| 23.6349994717166 | 3.07519851162913 |
| 23.6374994716607 | 2.16690978885463 |
| 23.6399994716048 | 3.06247886802342 |
| 23.6424994715489 | 2.16314633696405 |
| 23.6449994714931 | 3.05418886685892 |
| 23.6474994714372 | 2.15362961785308 |
| 23.6499994713813 | 3.04996936581763 |
| 23.6524994713254 | 2.14611917024708 |
| 23.6549994712695 | 3.03505466309735 |
| 23.6574994712137 | 2.12990643960832 |
| 23.6599994711578 | 3.01707937397775 |
| 23.6624994711019 | 2.09753303876173 |
| 23.6649994710460 | 3.01802928635575 |
| 23.6674994709902 | 2.07093965848114 |
| 23.6699994709343 | 3.03419640776022 |
| 23.6724994708784 | 2.07294357596969 |

|                  |                  |
|------------------|------------------|
| 23.6749994708225 | 3.03944621739718 |
| 23.6774994707666 | 2.09963066019574 |
| 23.6799994707108 | 3.03632477543049 |
| 23.6824994706549 | 2.11648000479334 |
| 23.6849994705990 | 3.04177259719888 |
| 23.6874994705431 | 2.12187535962624 |
| 23.6899994704872 | 3.06784109308435 |
| 23.6924994704314 | 2.13543725117363 |
| 23.6949994703755 | 3.08442373502604 |
| 23.6974994703196 | 2.16523288393512 |
| 23.6999994702637 | 3.09653673376984 |
| 23.7024994702078 | 2.17702218136472 |
| 23.7049994701520 | 3.10930680485104 |
| 23.7074994700961 | 2.16069572846595 |
| 23.7099994700402 | 3.13866876267535 |
| 23.7124994699843 | 2.14113256547160 |
| 23.7149994699284 | 3.14046681013142 |
| 23.7174994698726 | 2.14578491140445 |
| 23.7199994698167 | 3.12439446277147 |
| 23.7224994697608 | 2.15456148888840 |
| 23.7249994697049 | 3.10133908448609 |
| 23.7274994696490 | 2.14992763904463 |
| 23.7299994695932 | 3.10173593516840 |
| 23.7324994695373 | 2.12938603007017 |
| 23.7349994694814 | 3.09025263747756 |
| 23.7374994694255 | 2.11427980944883 |
| 23.7399994693696 | 3.06660435586937 |
| 23.7424994693138 | 2.10407928489803 |
| 23.7449994692579 | 3.04341019974403 |
| 23.7474994692020 | 2.10302931685319 |
| 23.7499994691461 | 3.03822845717797 |
| 23.7524994690903 | 2.10699950498594 |
| 23.7549994690344 | 3.03415547679334 |
| 23.7574994689785 | 2.11472200975211 |
| 23.7599994689226 | 3.01350812383275 |
| 23.7624994688667 | 2.11216447474859 |
| 23.7649994688109 | 3.00443908766245 |
| 23.7674994687550 | 2.10752868863914 |
| 23.7699994686991 | 3.01771375215129 |
| 23.7724994686432 | 2.11397000035029 |
| 23.7749994685873 | 3.04205445458263 |
| 23.7774994685315 | 2.13249622081635 |
| 23.7799994684756 | 3.04162396638276 |
| 23.7824994684197 | 2.14292941683785 |
| 23.7849994683638 | 3.04461253484528 |
| 23.7874994683079 | 2.13453944967386 |
| 23.7899994682521 | 3.05695360944225 |
| 23.7924994681962 | 2.13022439769640 |
| 23.7949994681403 | 3.08245513645503 |
| 23.7974994680844 | 2.14341409674519 |
| 23.7999994680285 | 3.07853258298268 |
| 23.8024994679727 | 2.15997277108717 |



|                  |                  |
|------------------|------------------|
| 23.8049994679168 | 3.07341764068569 |
| 23.8074994678609 | 2.14446667650724 |
| 23.8099994678050 | 3.07795240283244 |
| 23.8124994677491 | 2.11240119912672 |
| 23.8149994676933 | 3.10376427945390 |
| 23.8174994676374 | 2.09758647643548 |
| 23.8199994675815 | 3.10455603164720 |
| 23.8224994675256 | 2.11470837426559 |
| 23.8249994674698 | 3.09705587150829 |
| 23.8274994674139 | 2.12609872776501 |
| 23.8299994673580 | 3.09409709568106 |
| 23.8324994673021 | 2.12146371144689 |
| 23.8349994672462 | 3.10976837373236 |
| 23.8374994671904 | 2.11973978806456 |
| 23.8399994671345 | 3.10620087715009 |
| 23.8424994670786 | 2.14246749814904 |
| 23.8449994670227 | 3.08927006270478 |
| 23.8474994669668 | 2.16525782420247 |
| 23.8499994669110 | 3.07700012993272 |
| 23.8524994668551 | 2.17494550717989 |
| 23.8549994667992 | 3.07507678463238 |
| 23.8574994667433 | 2.16756224176770 |
| 23.8599994666874 | 3.06393612288181 |
| 23.8624994666316 | 2.15706090466936 |
| 23.8649994665757 | 3.03267462478684 |
| 23.8674994665198 | 2.13596954366864 |
| 23.8699994664639 | 3.01678392055397 |
| 23.8724994664080 | 2.11230269730903 |
| 23.8749994663522 | 3.00953326679537 |
| 23.8774994662963 | 2.09041876967894 |
| 23.8799994662404 | 3.01106196269638 |
| 23.8824994661845 | 2.07851212369065 |
| 23.8849994661286 | 2.99182473958018 |
| 23.8874994660728 | 2.06630435640590 |
| 23.8899994660169 | 2.99749564185922 |
| 23.8924994659610 | 2.06141847705554 |
| 23.8949994659051 | 3.02257253343654 |
| 23.8974994658493 | 2.08261807182930 |
| 23.8999994657934 | 3.05741186471924 |
| 23.9024994657375 | 2.12687925680091 |
| 23.9049994656816 | 3.06645433842117 |
| 23.9074994656257 | 2.16768720477310 |
| 23.9099994655699 | 3.08150850257743 |
| 23.9124994655140 | 2.18513913382878 |
| 23.9149994654581 | 3.10652614857448 |
| 23.9174994654022 | 2.19951078733477 |
| 23.9199994653463 | 3.13098825732867 |
| 23.9224994652905 | 2.21312567703712 |
| 23.9249994652346 | 3.12820259001955 |
| 23.9274994651787 | 2.21514424206574 |
| 23.9299994651228 | 3.11550648684239 |
| 23.9324994650669 | 2.17631228932660 |

|                  |                  |
|------------------|------------------|
| 23.9349994650111 | 3.11694739624701 |
| 23.9374994649552 | 2.12679972066224 |
| 23.9399994648993 | 3.12167684229502 |
| 23.9424994648434 | 2.09521713312320 |
| 23.9449994647875 | 3.10446147712933 |
| 23.9474994647317 | 2.09287353973192 |
| 23.9499994646758 | 3.06988119862789 |
| 23.9524994646199 | 2.08086484538857 |
| 23.9549994645640 | 3.05584547896797 |
| 23.9574994645081 | 2.06501630033906 |
| 23.9599994644523 | 3.06039214761556 |
| 23.9624994643964 | 2.07392455079687 |
| 23.9649994643405 | 3.05292338041622 |
| 23.9674994642846 | 2.11980030433859 |
| 23.9699994642287 | 3.03218795802800 |
| 23.9724994641729 | 2.16128033893523 |
| 23.9749994641170 | 3.02751986782614 |
| 23.9774994640611 | 2.17859401756179 |
| 23.9799994640052 | 3.04153639436667 |
| 23.9824994639494 | 2.18115455650694 |
| 23.9849994638935 | 3.04374221131455 |
| 23.9874994638376 | 2.18576787947211 |
| 23.9899994637817 | 3.02139763567707 |
| 23.9924994637258 | 2.17739953240764 |
| 23.9949994636700 | 3.01219008462680 |
| 23.9974994636141 | 2.14646134336261 |
| 23.9999994635582 | 3.02752711876376 |
| 24.0024994635023 | 2.10331478086710 |
| 24.0049994634464 | 3.04320935022289 |
| 24.0074994633906 | 2.06933284058631 |
| 24.0099994633347 | 3.03369636465105 |
| 24.0124994632788 | 2.05309495829199 |
| 24.0149994632229 | 3.03721824115654 |
| 24.0174994631670 | 2.05621967119566 |
| 24.0199994631112 | 3.06330527866241 |
| 24.0224994630553 | 2.08797234369184 |
| 24.0249994629994 | 3.09456667388295 |
| 24.0274994629435 | 2.13370502293522 |
| 24.0299994628876 | 3.09978711454416 |
| 24.0324994628318 | 2.17254715511125 |
| 24.0349994627759 | 3.10633020662550 |
| 24.0374994627200 | 2.19259320968642 |
| 24.0399994626641 | 3.12862616492063 |
| 24.0424994626082 | 2.21600193670944 |
| 24.0449994625524 | 3.14891481504502 |
| 24.0474994624965 | 2.23473816018275 |
| 24.0499994624406 | 3.13874358212582 |
| 24.0524994623847 | 2.23249028191950 |
| 24.0549994623289 | 3.11579063881304 |
| 24.0574994622730 | 2.18653619038469 |
| 24.0599994622171 | 3.10587969995394 |
| 24.0624994621612 | 2.13378953905721 |

|                  |                  |
|------------------|------------------|
| 24.0649994621053 | 3.10028955506369 |
| 24.0674994620495 | 2.09981051328781 |
| 24.0699994619936 | 3.07324755275035 |
| 24.0724994619377 | 2.09020305455858 |
| 24.0749994618818 | 3.03421907261177 |
| 24.0774994618259 | 2.06486546565945 |
| 24.0799994617701 | 3.01710436734380 |
| 24.0824994617142 | 2.03836339418956 |
| 24.0849994616583 | 3.02443367365892 |
| 24.0874994616024 | 2.05030528030291 |
| 24.0899994615465 | 3.02084873984399 |
| 24.0924994614907 | 2.10794063384053 |
| 24.0949994614348 | 3.00740970716745 |
| 24.0974994613789 | 2.16147254636949 |
| 24.0999994613230 | 3.01341248127069 |
| 24.1024994612671 | 2.18470270683610 |
| 24.1049994612113 | 3.04196210635077 |
| 24.1074994611554 | 2.19282426343517 |
| 24.1099994610995 | 3.05878408011239 |
| 24.1124994610436 | 2.20093204735471 |
| 24.1149994609877 | 3.05310353152329 |
| 24.1174994609319 | 2.19771313115156 |
| 24.1199994608760 | 3.05942335765582 |
| 24.1224994608201 | 2.16797546769653 |
| 24.1249994607642 | 3.08289384085602 |
| 24.1274994607083 | 2.12692342289326 |
| 24.1299994606525 | 3.09953176592369 |
| 24.1324994605966 | 2.09392053479711 |
| 24.1349994605407 | 3.08332877354865 |
| 24.1374994604848 | 2.07683476943088 |
| 24.1399994604290 | 3.07955732213966 |
| 24.1424994603731 | 2.07161822903111 |
| 24.1449994603172 | 3.09407808362911 |
| 24.1474994602613 | 2.09011061991321 |
| 24.1499994602054 | 3.11249456160360 |
| 24.1524994601496 | 2.12253643182019 |
| 24.1549994600937 | 3.09712367299499 |
| 24.1574994600378 | 2.15105939535593 |
| 24.1599994599819 | 3.09090946435608 |
| 24.1624994599260 | 2.16321779034590 |
| 24.1649994598702 | 3.10678089584460 |
| 24.1674994598143 | 2.18307054496574 |
| 24.1699994597584 | 3.12129300784451 |
| 24.1724994597025 | 2.20590578931128 |
| 24.1749994596466 | 3.10288289856337 |
| 24.1774994595908 | 2.21441342620659 |
| 24.1799994595349 | 3.07230764408075 |
| 24.1824994594790 | 2.18305499742792 |
| 24.1849994594231 | 3.06597822141531 |
| 24.1874994593672 | 2.14355956713267 |
| 24.1899994593114 | 3.06355513223395 |
| 24.1924994592555 | 2.11551974464102 |

|                  |                  |
|------------------|------------------|
| 24.1949994591996 | 3.04511065283119 |
| 24.1974994591437 | 2.10396863339785 |
| 24.1999994590878 | 3.00921198895741 |
| 24.2024994590320 | 2.07517658186141 |
| 24.2049994589761 | 3.00604673372288 |
| 24.2074994589202 | 2.04932439743663 |
| 24.2099994588643 | 3.01919672443682 |
| 24.2124994588085 | 2.06029971932484 |
| 24.2149994587526 | 3.02368631412933 |
| 24.2174994586967 | 2.10578800609202 |
| 24.2199994586408 | 3.01033513032104 |
| 24.2224994585849 | 2.14098781093821 |
| 24.2249994585291 | 3.02541618606118 |
| 24.2274994584732 | 2.15054526875767 |
| 24.2299994584173 | 3.06546681632243 |
| 24.2324994583614 | 2.16388491012923 |
| 24.2349994583055 | 3.09567063630258 |
| 24.2374994582497 | 2.18576478176884 |
| 24.2399994581938 | 3.09942960143992 |
| 24.2424994581379 | 2.19922325543611 |
| 24.2449994580820 | 3.10900696949267 |
| 24.2474994580261 | 2.18088495386506 |
| 24.2499994579703 | 3.13754429462613 |
| 24.2524994579144 | 2.15738707531263 |
| 24.2549994578585 | 3.15336174963831 |
| 24.2574994578026 | 2.14697888768567 |
| 24.2599994577467 | 3.13352795973006 |
| 24.2624994576909 | 2.14951010711860 |
| 24.2649994576350 | 3.10901044714263 |
| 24.2674994575791 | 2.13633768187920 |
| 24.2699994575232 | 3.11212472359014 |
| 24.2724994574673 | 2.11864423083513 |
| 24.2749994574115 | 3.11746117050734 |
| 24.2774994573556 | 2.10901969987101 |
| 24.2799994572997 | 3.09424670898508 |
| 24.2824994572438 | 2.11475987493048 |
| 24.2849994571880 | 3.06605817244324 |
| 24.2874994571321 | 2.11832597297677 |
| 24.2899994570762 | 3.06369469862289 |
| 24.2924994570203 | 2.12956764998955 |
| 24.2949994569644 | 3.06809831861676 |
| 24.2974994569086 | 2.14386699850994 |
| 24.2999994568527 | 3.05069251544399 |
| 24.3024994567968 | 2.15184309107356 |
| 24.3049994567409 | 3.02700868582384 |
| 24.3074994566850 | 2.13748835016170 |
| 24.3099994566292 | 3.03658023758092 |
| 24.3124994565733 | 2.12667318239804 |
| 24.3149994565174 | 3.05598512221477 |
| 24.3174994564615 | 2.13389204471501 |
| 24.3199994564056 | 3.05500809520908 |
| 24.3224994563498 | 2.14614234459087 |

|                  |                  |
|------------------|------------------|
| 24.3249994562939 | 3.03744435973830 |
| 24.3274994562380 | 2.13516776676822 |
| 24.3299994561821 | 3.04212149474376 |
| 24.3324994561262 | 2.11667438463383 |
| 24.3349994560704 | 3.06028904362529 |
| 24.3374994560145 | 2.12259240693662 |
| 24.3399994559586 | 3.06206052705903 |
| 24.3424994559027 | 2.14308225024379 |
| 24.3449994558468 | 3.05178298694222 |
| 24.3474994557910 | 2.14409030579358 |
| 24.3499994557351 | 3.06384766466008 |
| 24.3524994556792 | 2.11436756597664 |
| 24.3549994556233 | 3.10391123159813 |
| 24.3574994555674 | 2.10702480849182 |
| 24.3599994555116 | 3.12462940185568 |
| 24.3624994554557 | 2.13471925982481 |
| 24.3649994553998 | 3.11727424473513 |
| 24.3674994553439 | 2.17084818889991 |
| 24.3699994552881 | 3.11240382541308 |
| 24.3724994552322 | 2.17311010083152 |
| 24.3749994551763 | 3.13552723527336 |
| 24.3774994551204 | 2.16688080352127 |
| 24.3799994550645 | 3.14996875529282 |
| 24.3824994550087 | 2.17015095560332 |
| 24.3849994549528 | 3.13619929359472 |
| 24.3874994548969 | 2.18702296726989 |
| 24.3899994548410 | 3.12122648068960 |
| 24.3924994547851 | 2.18807493404728 |
| 24.3949994547293 | 3.11936357276689 |
| 24.3974994546734 | 2.17832116918925 |
| 24.3999994546175 | 3.11751806282369 |
| 24.4024994545616 | 2.16586193454638 |
| 24.4049994545057 | 3.07814663732919 |
| 24.4074994544499 | 2.15333226140928 |
| 24.4099994543940 | 3.03791457310060 |
| 24.4124994543381 | 2.12843033165453 |
| 24.4149994542822 | 3.02470670421712 |
| 24.4174994542263 | 2.10459945501965 |
| 24.4199994541705 | 3.03612827358233 |
| 24.4224994541146 | 2.09274376927731 |
| 24.4249994540587 | 3.02548181427835 |
| 24.4274994540028 | 2.08791003772528 |
| 24.4299994539469 | 3.01221330290137 |
| 24.4324994538911 | 2.08509158823012 |
| 24.4349994538352 | 3.02287441405114 |
| 24.4374994537793 | 2.10189552318164 |
| 24.4399994537234 | 3.04636261107078 |
| 24.4424994536676 | 2.14718406244877 |
| 24.4449994536117 | 3.05508377360720 |
| 24.4474994535558 | 2.19290821515585 |
| 24.4499994534999 | 3.04920778105101 |
| 24.4524994534440 | 2.21376754823401 |

|                  |                  |
|------------------|------------------|
| 24.4549994533882 | 3.07038746869023 |
| 24.4574994533323 | 2.21314730842753 |
| 24.4599994532764 | 3.10707934127598 |
| 24.4624994532205 | 2.22139986911452 |
| 24.4649994531646 | 3.12936865111447 |
| 24.4674994531088 | 2.23353444434018 |
| 24.4699994530529 | 3.11975304080660 |
| 24.4724994529970 | 2.22893246201360 |
| 24.4749994529411 | 3.11979772904927 |
| 24.4774994528852 | 2.19357279272332 |
| 24.4799994528294 | 3.13313743059349 |
| 24.4824994527735 | 2.16633840170851 |
| 24.4849994527176 | 3.14241993026028 |
| 24.4874994526617 | 2.15537094621854 |
| 24.4899994526058 | 3.12843933296300 |
| 24.4924994525500 | 2.15104190933440 |
| 24.4949994524941 | 3.12231216384605 |
| 24.4974994524382 | 2.12604613776677 |
| 24.4999994523823 | 3.13608933834401 |
| 24.5024994523264 | 2.11659933461626 |
| 24.5049994522706 | 3.14489391460459 |
| 24.5074994522147 | 2.14240506541177 |
| 24.5099994521588 | 3.12293158708080 |
| 24.5124994521029 | 2.18973910633322 |
| 24.5149994520470 | 3.09844669959772 |
| 24.5174994519912 | 2.21694065033257 |
| 24.5199994519353 | 3.09748121587412 |
| 24.5224994518794 | 2.22891118049621 |
| 24.5249994518235 | 3.10447729845815 |
| 24.5274994517677 | 2.24104951450922 |
| 24.5299994517118 | 3.08651932455152 |
| 24.5324994516559 | 2.25138238781532 |
| 24.5349994516000 | 3.06186526030490 |
| 24.5374994515441 | 2.24312866381155 |
| 24.5399994514883 | 3.05640704797398 |
| 24.5424994514324 | 2.21255328338415 |
| 24.5449994513765 | 3.06447969855390 |
| 24.5474994513206 | 2.17890633563584 |
| 24.5499994512647 | 3.05603291123705 |
| 24.5524994512089 | 2.14637581293538 |
| 24.5549994511530 | 3.03397404919455 |
| 24.5574994510971 | 2.11732412252140 |
| 24.5599994510412 | 3.03929574780425 |
| 24.5624994509853 | 2.09232314153287 |
| 24.5649994509295 | 3.06511193376849 |
| 24.5674994508736 | 2.09347021421992 |
| 24.5699994508177 | 3.08347769688367 |
| 24.5724994507618 | 2.11126227472832 |
| 24.5749994507059 | 3.07978221123524 |
| 24.5774994506501 | 2.13489300846998 |
| 24.5799994505942 | 3.09900782816856 |
| 24.5824994505383 | 2.16178895939474 |



|                  |                  |
|------------------|------------------|
| 24.5849994504824 | 3.13357483660531 |
| 24.5874994504265 | 2.21213778178010 |
| 24.5899994503707 | 3.15885569428757 |
| 24.5924994503148 | 2.26182672031922 |
| 24.5949994502589 | 3.15746944224976 |
| 24.5974994502030 | 2.28769382438582 |
| 24.5999994501472 | 3.16367348944040 |
| 24.6024994500913 | 2.28144736686714 |
| 24.6049994500354 | 3.18274677225836 |
| 24.6074994499795 | 2.27693813245903 |
| 24.6099994499236 | 3.19168684297160 |
| 24.6124994498678 | 2.27396483072650 |
| 24.6149994498119 | 3.17477550872814 |
| 24.6174994497560 | 2.25724174805868 |
| 24.6199994497001 | 3.15449959443792 |
| 24.6224994496442 | 2.20486332906532 |
| 24.6249994495884 | 3.15127308674748 |
| 24.6274994495325 | 2.14531764181111 |
| 24.6299994494766 | 3.14382211462560 |
| 24.6324994494207 | 2.10812610791978 |
| 24.6349994493648 | 3.11626392523323 |
| 24.6374994493090 | 2.09695884595979 |
| 24.6399994492531 | 3.07956392905944 |
| 24.6424994491972 | 2.08708258965356 |
| 24.6449994491413 | 3.06347081222361 |
| 24.6474994490854 | 2.07742933247271 |
| 24.6499994490296 | 3.05800842995977 |
| 24.6524994489737 | 2.09048777118906 |
| 24.6549994489178 | 3.04359064044345 |
| 24.6574994488619 | 2.12205514107810 |
| 24.6599994488060 | 3.03056832078556 |
| 24.6624994487502 | 2.15745402751971 |
| 24.6649994486943 | 3.03301867744628 |
| 24.6674994486384 | 2.17880632234533 |
| 24.6699994485825 | 3.04580974237788 |
| 24.6724994485267 | 2.19862975099606 |
| 24.6749994484708 | 3.04026457741000 |
| 24.6774994484149 | 2.20383599025994 |
| 24.6799994483590 | 3.02745346073263 |
| 24.6824994483031 | 2.19359703773733 |
| 24.6849994482473 | 3.03309907769479 |
| 24.6874994481914 | 2.15985044181953 |
| 24.6899994481355 | 3.05751295506626 |
| 24.6924994480796 | 2.12951839374775 |
| 24.6949994480237 | 3.06958877928184 |
| 24.6974994479679 | 2.10094270941166 |
| 24.6999994479120 | 3.06272060082437 |
| 24.7024994478561 | 2.07948093447019 |
| 24.7049994478002 | 3.06884226849931 |
| 24.7074994477443 | 2.06838881454842 |
| 24.7099994476885 | 3.08917104372581 |
| 24.7124994476326 | 2.09021656650214 |

|                  |                  |
|------------------|------------------|
| 24.7149994475767 | 3.10260972282287 |
| 24.7174994475208 | 2.12413997902704 |
| 24.7199994474649 | 3.09725447224360 |
| 24.7224994474091 | 2.14695841858709 |
| 24.7249994473532 | 3.10861175765534 |
| 24.7274994472973 | 2.15450032514943 |
| 24.7299994472414 | 3.13814295883027 |
| 24.7324994471855 | 2.17693332116994 |
| 24.7349994471297 | 3.15421815708378 |
| 24.7374994470738 | 2.20968542403415 |
| 24.7399994470179 | 3.13202786340783 |
| 24.7424994469620 | 2.22337035298890 |
| 24.7449994469061 | 3.10886749320987 |
| 24.7474994468503 | 2.19877526670758 |
| 24.7499994467944 | 3.09929780780825 |
| 24.7524994467385 | 2.16397599877864 |
| 24.7549994466826 | 3.09230704108082 |
| 24.7574994466268 | 2.13941381592342 |
| 24.7599994465709 | 3.06225444317369 |
| 24.7624994465150 | 2.11402445386661 |
| 24.7649994464591 | 3.03574867235185 |
| 24.7674994464032 | 2.07524699229224 |
| 24.7699994463474 | 3.02512805045819 |
| 24.7724994462915 | 2.04263528157280 |
| 24.7749994462356 | 3.02345167182891 |
| 24.7774994461797 | 2.05190207190451 |
| 24.7799994461238 | 3.00192188178224 |
| 24.7824994460680 | 2.08617726463357 |
| 24.7849994460121 | 2.98547074328271 |
| 24.7874994459562 | 2.11837181441526 |
| 24.7899994459003 | 2.99836598116457 |
| 24.7924994458444 | 2.12864030004390 |
| 24.7949994457886 | 3.03412899468612 |
| 24.7974994457327 | 2.14564569466769 |
| 24.7999994456768 | 3.05801460728967 |
| 24.8024994456209 | 2.16441788885441 |
| 24.8049994455650 | 3.06804964506786 |
| 24.8074994455092 | 2.18204777285604 |
| 24.8099994454533 | 3.08074037457313 |
| 24.8124994453974 | 2.18010184795069 |
| 24.8149994453415 | 3.09564666047112 |
| 24.8174994452856 | 2.16941043395251 |
| 24.8199994452298 | 3.10565790314532 |
| 24.8224994451739 | 2.14576309077424 |
| 24.8249994451180 | 3.09708857829155 |
| 24.8274994450621 | 2.12297181320266 |
| 24.8299994450063 | 3.10354423554974 |
| 24.8324994449504 | 2.10236725248326 |
| 24.8349994448945 | 3.11324034840309 |
| 24.8374994448386 | 2.09913824226753 |
| 24.8399994447827 | 3.11983995513247 |
| 24.8424994447269 | 2.10557050658034 |

|                  |                  |
|------------------|------------------|
| 24.8449994446710 | 3.09670355067643 |
| 24.8474994446151 | 2.11152032628104 |
| 24.8499994445592 | 3.08653684877161 |
| 24.8524994445033 | 2.11702860715721 |
| 24.8549994444475 | 3.08356683757706 |
| 24.8574994443916 | 2.13844791059310 |
| 24.8599994443357 | 3.08582145543387 |
| 24.8624994442798 | 2.16459885667830 |
| 24.8649994442239 | 3.06916609156917 |
| 24.8674994441681 | 2.16824033648625 |
| 24.8699994441122 | 3.06515755825455 |
| 24.8724994440563 | 2.14870326194056 |
| 24.8749994440004 | 3.06496030988674 |
| 24.8774994439445 | 2.13347671847480 |
| 24.8799994438887 | 3.05736993106363 |
| 24.8824994438328 | 2.13758930839065 |
| 24.8849994437769 | 3.02837380325167 |
| 24.8874994437210 | 2.13509381562614 |
| 24.8899994436651 | 3.00920094152185 |
| 24.8924994436093 | 2.11075212965734 |
| 24.8949994435534 | 3.01684982220478 |
| 24.8974994434975 | 2.07774135051936 |
| 24.8999994434416 | 3.02615739107189 |
| 24.9024994433858 | 2.07269760130946 |
| 24.9049994433299 | 3.02387037005838 |
| 24.9074994432740 | 2.08735531822879 |
| 24.9099994432181 | 3.02045844571466 |
| 24.9124994431622 | 2.10559012842861 |
| 24.9149994431064 | 3.04359131786020 |
| 24.9174994430505 | 2.11480119581274 |
| 24.9199994429946 | 3.06594688578537 |
| 24.9224994429387 | 2.13351551003760 |
| 24.9249994428828 | 3.07881349060283 |
| 24.9274994428270 | 2.15089868051775 |
| 24.9299994427711 | 3.08710116521973 |
| 24.9324994427152 | 2.16434256968461 |
| 24.9349994426593 | 3.11800643815724 |
| 24.9374994426034 | 2.16732683280257 |
| 24.9399994425476 | 3.14047024957521 |
| 24.9424994424917 | 2.17243321517625 |
| 24.9449994424358 | 3.14183162907419 |
| 24.9474994423799 | 2.16902988366896 |
| 24.9499994423240 | 3.11784972607421 |
| 24.9524994422682 | 2.15566708357715 |
| 24.9549994422123 | 3.11409996026284 |
| 24.9574994421564 | 2.13674484329037 |
| 24.9599994421005 | 3.11411221814549 |
| 24.9624994420446 | 2.12778914439260 |
| 24.9649994419888 | 3.10480167881203 |
| 24.9674994419329 | 2.11825420016909 |
| 24.9699994418770 | 3.07264041482680 |
| 24.9724994418211 | 2.09751698261182 |

|                  |                  |
|------------------|------------------|
| 24.9749994417652 | 3.05739312696094 |
| 24.9774994417094 | 2.08227193733407 |
| 24.9799994416535 | 3.04950117166546 |
| 24.9824994415976 | 2.09329743889229 |
| 24.9849994415417 | 3.03779656414810 |
| 24.9874994414859 | 2.11785341336269 |
| 24.9899994414300 | 3.01601207974206 |
| 24.9924994413741 | 2.12288202393727 |
| 24.9949994413182 | 3.01445772334627 |
| 24.9974994412623 | 2.11485181786384 |
| 24.9999994412065 | 3.03265603564812 |
| 25.0024994411506 | 2.11728265658745 |
| 25.0049994410947 | 3.04473154651950 |
| 25.0074994410388 | 2.14041805693794 |
| 25.0099994409829 | 3.03940924322639 |
| 25.0124994409271 | 2.15525878276670 |
| 25.0149994408712 | 3.03512053229077 |
| 25.0174994408153 | 2.15070927146046 |
| 25.0199994407594 | 3.04871576914904 |
| 25.0224994407035 | 2.13442861095376 |
| 25.0249994406477 | 3.05681565183787 |
| 25.0274994405918 | 2.12742965275893 |
| 25.0299994405359 | 3.06198737750452 |
| 25.0324994404800 | 2.11858891893142 |
| 25.0349994404241 | 3.07181896212993 |
| 25.0374994403683 | 2.10582596664539 |
| 25.0399994403124 | 3.09729926349877 |
| 25.0424994402565 | 2.09560403984150 |
| 25.0449994402006 | 3.10782162635647 |
| 25.0474994401447 | 2.10761080742935 |
| 25.0499994400889 | 3.10202685557250 |
| 25.0524994400330 | 2.12740730780991 |
| 25.0549994399771 | 3.09576299131603 |
| 25.0574994399212 | 2.14281199770419 |
| 25.0599994398654 | 3.11115081330783 |
| 25.0624994398095 | 2.14488128323924 |
| 25.0649994397536 | 3.12790632495620 |
| 25.0674994396977 | 2.15062599728614 |
| 25.0699994396418 | 3.12707580704354 |
| 25.0724994395860 | 2.15755923822406 |
| 25.0749994395301 | 3.11274500937260 |
| 25.0774994394742 | 2.16173104256635 |
| 25.0799994394183 | 3.10710067010517 |
| 25.0824994393624 | 2.16235165832480 |
| 25.0849994393066 | 3.09035661683842 |
| 25.0874994392507 | 2.16168771269256 |
| 25.0899994391948 | 3.06024221940699 |
| 25.0924994391389 | 2.14606340660499 |
| 25.0949994390830 | 3.02124538088418 |
| 25.0974994390272 | 2.10846538688900 |
| 25.0999994389713 | 3.01599593088452 |
| 25.1024994389154 | 2.07335800221645 |

|                  |                  |
|------------------|------------------|
| 25.1049994388595 | 3.02414735807120 |
| 25.1074994388036 | 2.06504056693543 |
| 25.1099994387478 | 3.02455825772773 |
| 25.1124994386919 | 2.08154004240802 |
| 25.1149994386360 | 3.00244548137048 |
| 25.1174994385801 | 2.09007628621589 |
| 25.1199994385242 | 3.00401296113615 |
| 25.1224994384684 | 2.09652870897348 |
| 25.1249994384125 | 3.02629335029273 |
| 25.1274994383566 | 2.11886853867318 |
| 25.1299994383007 | 3.04836713608794 |
| 25.1324994382448 | 2.15820310115661 |
| 25.1349994381890 | 3.05695454436503 |
| 25.1374994381331 | 2.17434516003394 |
| 25.1399994380772 | 3.08341147967199 |
| 25.1424994380213 | 2.16471849250959 |
| 25.1449994379655 | 3.12005208013809 |
| 25.1474994379096 | 2.15687147095741 |
| 25.1499994378537 | 3.13336835204704 |
| 25.1524994377978 | 2.16906505116398 |
| 25.1549994377419 | 3.11741070716885 |
| 25.1574994376861 | 2.17262393360034 |
| 25.1599994376302 | 3.10039787149795 |
| 25.1624994375743 | 2.14762215360384 |
| 25.1649994375184 | 3.11340634918509 |
| 25.1674994374625 | 2.10587693195733 |
| 25.1699994374067 | 3.12231691046537 |
| 25.1724994373508 | 2.08473801329783 |
| 25.1749994372949 | 3.11551439837341 |
| 25.1774994372390 | 2.08642287392297 |
| 25.1799994371831 | 3.09676571346252 |
| 25.1824994371273 | 2.09845052841877 |
| 25.1849994370714 | 3.09571870136985 |
| 25.1874994370155 | 2.11438648546452 |
| 25.1899994369596 | 3.08576006026198 |
| 25.1924994369037 | 2.13767672425954 |
| 25.1949994368479 | 3.06602980488922 |
| 25.1974994367920 | 2.15546371115568 |
| 25.1999994367361 | 3.04285558767648 |
| 25.2024994366802 | 2.16163868236068 |
| 25.2049994366243 | 3.05127242992657 |
| 25.2074994365685 | 2.15988596347701 |
| 25.2099994365126 | 3.05303180709619 |
| 25.2124994364567 | 2.15499225253967 |
| 25.2149994364008 | 3.04516243024145 |
| 25.2174994363450 | 2.14226509858071 |
| 25.2199994362891 | 3.01275511789209 |
| 25.2224994362332 | 2.11494841027057 |
| 25.2249994361773 | 3.00760541252023 |
| 25.2274994361214 | 2.08910712171229 |
| 25.2299994360656 | 3.01327045941864 |
| 25.2324994360097 | 2.07764362323884 |

|                  |                  |
|------------------|------------------|
| 25.2349994359538 | 3.02182757570547 |
| 25.2374994358979 | 2.07807155872386 |
| 25.2399994358420 | 3.02302198710413 |
| 25.2424994357862 | 2.07017642485465 |
| 25.2449994357303 | 3.05235767771636 |
| 25.2474994356744 | 2.07445519066983 |
| 25.2499994356185 | 3.08895646102741 |
| 25.2524994355626 | 2.11246817113063 |
| 25.2549994355068 | 3.10530911480162 |
| 25.2574994354509 | 2.17203839943819 |
| 25.2599994353950 | 3.10517925656233 |
| 25.2624994353391 | 2.20541491858698 |
| 25.2649994352832 | 3.11578446922521 |
| 25.2674994352274 | 2.20490297196702 |
| 25.2699994351715 | 3.14881633574999 |
| 25.2724994351156 | 2.19572955141133 |
| 25.2749994350597 | 3.15756091147107 |
| 25.2774994350038 | 2.19503977765279 |
| 25.2799994349480 | 3.14561915713219 |
| 25.2824994348921 | 2.18189838567542 |
| 25.2849994348362 | 3.11822134369098 |
| 25.2874994347803 | 2.13987040977275 |
| 25.2899994347245 | 3.11724392933694 |
| 25.2924994346686 | 2.09352495096309 |
| 25.2949994346127 | 3.09550940475086 |
| 25.2974994345568 | 2.07323232714981 |
| 25.2999994345009 | 3.06321235078014 |
| 25.3024994344451 | 2.06881010519187 |
| 25.3049994343892 | 3.03463047358208 |
| 25.3074994343333 | 2.06236484645103 |
| 25.3099994342774 | 3.04774446806897 |
| 25.3124994342215 | 2.06686403869389 |
| 25.3149994341657 | 3.05331043973897 |
| 25.3174994341098 | 2.10220012571068 |
| 25.3199994340539 | 3.04049071700573 |
| 25.3224994339980 | 2.14859685177234 |
| 25.3249994339421 | 3.01791697250289 |
| 25.3274994338863 | 2.18012265270810 |
| 25.3299994338304 | 3.02820183417849 |
| 25.3324994337745 | 2.19008810509235 |
| 25.3349994337186 | 3.04565464488376 |
| 25.3374994336627 | 2.18769821612466 |
| 25.3399994336069 | 3.05008990910530 |
| 25.3424994335510 | 2.17118155077046 |
| 25.3449994334951 | 3.04055957500671 |
| 25.3474994334392 | 2.13783075875196 |
| 25.3499994333833 | 3.05054187365130 |
| 25.3524994333275 | 2.10309538183531 |
| 25.3549994332716 | 3.06773601025805 |
| 25.3574994332157 | 2.08363640066759 |
| 25.3599994331598 | 3.06724059542303 |
| 25.3624994331039 | 2.07333561816267 |



|                  |                  |
|------------------|------------------|
| 25.3649994330481 | 3.05578121001308 |
| 25.3674994329922 | 2.05788082949451 |
| 25.3699994329363 | 3.07157953060457 |
| 25.3724994328804 | 2.06012728711408 |
| 25.3749994328246 | 3.10858415853279 |
| 25.3774994327687 | 2.10037574906420 |
| 25.3799994327128 | 3.13062408325209 |
| 25.3824994326569 | 2.16094684385017 |
| 25.3849994326010 | 3.13145162940608 |
| 25.3874994325452 | 2.19999435277230 |
| 25.3899994324893 | 3.13101106253763 |
| 25.3924994324334 | 2.21389769226380 |
| 25.3949994323775 | 3.14424231864053 |
| 25.3974994323216 | 2.22198856960809 |
| 25.3999994322658 | 3.13777797537190 |
| 25.4024994322099 | 2.22818988570970 |
| 25.4049994321540 | 3.11877288507996 |
| 25.4074994320981 | 2.20699830970552 |
| 25.4099994320422 | 3.09413261294551 |
| 25.4124994319864 | 2.15035006854675 |
| 25.4149994319305 | 3.09161693996944 |
| 25.4174994318746 | 2.08938429380643 |
| 25.4199994318187 | 3.06682037689673 |
| 25.4224994317628 | 2.05839269418277 |
| 25.4249994317070 | 3.03173164661914 |
| 25.4274994316511 | 2.05125852310624 |
| 25.4299994315952 | 2.99765677033946 |
| 25.4324994315393 | 2.04668015810825 |
| 25.4349994314834 | 3.00373325486485 |
| 25.4374994314276 | 2.04689294536866 |
| 25.4399994313717 | 3.01517540013662 |
| 25.4424994313158 | 2.07498863926384 |
| 25.4449994312599 | 3.02660892516146 |
| 25.4474994312041 | 2.12419232583493 |
| 25.4499994311482 | 3.03298104807960 |
| 25.4524994310923 | 2.17300905293696 |
| 25.4549994310364 | 3.05974403134200 |
| 25.4574994309805 | 2.20693753163700 |
| 25.4599994309247 | 3.07865485767697 |
| 25.4624994308688 | 2.22402286422802 |
| 25.4649994308129 | 3.08126236256782 |
| 25.4674994307570 | 2.21519838901418 |
| 25.4699994307011 | 3.07864898392298 |
| 25.4724994306453 | 2.18186193780014 |
| 25.4749994305894 | 3.09914391036138 |
| 25.4774994305335 | 2.14041569946261 |
| 25.4799994304776 | 3.12185030771977 |
| 25.4824994304217 | 2.10933535829465 |
| 25.4849994303659 | 3.11759461377694 |
| 25.4874994303100 | 2.08500439748073 |
| 25.4899994302541 | 3.09670748666434 |
| 25.4924994301982 | 2.05825642048458 |

|                  |                  |
|------------------|------------------|
| 25.4949994301423 | 3.09113832821729 |
| 25.4974994300865 | 2.05270491586638 |
| 25.4999994300306 | 3.10353861006706 |
| 25.5024994299747 | 2.08681950765896 |
| 25.5049994299188 | 3.10155243101161 |
| 25.5074994298629 | 2.13634863089525 |
| 25.5099994298071 | 3.09251222729774 |
| 25.5124994297512 | 2.16033688428148 |
| 25.5149994296953 | 3.09723244826829 |
| 25.5174994296394 | 2.16715415026920 |
| 25.5199994295835 | 3.12168320835251 |
| 25.5224994295277 | 2.18599388187021 |
| 25.5249994294718 | 3.10643156461252 |
| 25.5274994294159 | 2.21353923027129 |
| 25.5299994293600 | 3.07629170187256 |
| 25.5324994293042 | 2.21436579408868 |
| 25.5349994292483 | 3.04074987284929 |
| 25.5374994291924 | 2.17190865171904 |
| 25.5399994291365 | 3.04259895760417 |
| 25.5424994290806 | 2.11291819423304 |
| 25.5449994290248 | 3.03263953873222 |
| 25.5474994289689 | 2.07176607174555 |
| 25.5499994289130 | 3.01992569001888 |
| 25.5524994288571 | 2.05176569123426 |
| 25.5549994288012 | 3.00194637583652 |
| 25.5574994287454 | 2.04054273644857 |
| 25.5599994286895 | 3.01557995709034 |
| 25.5624994286336 | 2.04588300490253 |
| 25.5649994285777 | 3.02652100177051 |
| 25.5674994285218 | 2.08024031205315 |
| 25.5699994284660 | 3.03004170561628 |
| 25.5724994284101 | 2.12523125382063 |
| 25.5749994283542 | 3.04206170212999 |
| 25.5774994282983 | 2.16251034717201 |
| 25.5799994282424 | 3.08212873425722 |
| 25.5824994281866 | 2.18687949812535 |
| 25.5849994281307 | 3.12421464039044 |
| 25.5874994280748 | 2.20670660995521 |
| 25.5899994280189 | 3.13699276183338 |
| 25.5924994279630 | 2.21264902326826 |
| 25.5949994279072 | 3.13757203191990 |
| 25.5974994278513 | 2.20067589105552 |
| 25.5999994277954 | 3.13420387578871 |
| 25.6024994277395 | 2.17603806511697 |
| 25.6049994276837 | 3.14116374723907 |
| 25.6074994276278 | 2.15115389982470 |
| 25.6099994275719 | 3.12381493829244 |
| 25.6124994275160 | 2.11900439943503 |
| 25.6149994274601 | 3.10294743367399 |
| 25.6174994274043 | 2.07920071325834 |
| 25.6199994273484 | 3.09016920522501 |
| 25.6224994272925 | 2.05529326847873 |

|                  |                  |
|------------------|------------------|
| 25.6249994272366 | 3.09170173698709 |
| 25.6274994271807 | 2.06854521877986 |
| 25.6299994271249 | 3.07065106551184 |
| 25.6324994270690 | 2.10230401021926 |
| 25.6349994270131 | 3.04627605927286 |
| 25.6374994269572 | 2.12555637020428 |
| 25.6399994269013 | 3.03352935792173 |
| 25.6424994268455 | 2.13885886269969 |
| 25.6449994267896 | 3.04468106187791 |
| 25.6474994267337 | 2.15564156646554 |
| 25.6499994266778 | 3.04368078454180 |
| 25.6524994266219 | 2.17437562144354 |
| 25.6549994265661 | 3.03770184698680 |
| 25.6574994265102 | 2.17287723766737 |
| 25.6599994264543 | 3.03125214473673 |
| 25.6624994263984 | 2.14782659721054 |
| 25.6649994263425 | 3.03970474331982 |
| 25.6674994262867 | 2.11910315249872 |
| 25.6699994262308 | 3.03616075262609 |
| 25.6724994261749 | 2.10454017933467 |
| 25.6749994261190 | 3.02488019707624 |
| 25.6774994260632 | 2.08967097430241 |
| 25.6799994260073 | 3.03163713602172 |
| 25.6824994259514 | 2.06832268786328 |
| 25.6849994258955 | 3.06190629754472 |
| 25.6874994258396 | 2.05998002502233 |
| 25.6899994257838 | 3.08337682064794 |
| 25.6924994257279 | 2.08632601697458 |
| 25.6949994256720 | 3.08264509934196 |
| 25.6974994256161 | 2.12553773691483 |
| 25.6999994255602 | 3.09164428304131 |
| 25.7024994255044 | 2.15581733692259 |
| 25.7049994254485 | 3.12011667871476 |
| 25.7074994253926 | 2.17409972621267 |
| 25.7099994253367 | 3.14415012487842 |
| 25.7124994252808 | 2.19201799083242 |
| 25.7149994252250 | 3.14114837828031 |
| 25.7174994251691 | 2.19870597884892 |
| 25.7199994251132 | 3.13834425996926 |
| 25.7224994250573 | 2.18951873427221 |
| 25.7249994250014 | 3.13906895549954 |
| 25.7274994249456 | 2.17103098052630 |
| 25.7299994248897 | 3.13322062130597 |
| 25.7324994248338 | 2.15206577701473 |
| 25.7349994247779 | 3.09715185279008 |
| 25.7374994247220 | 2.12255225215871 |
| 25.7399994246662 | 3.05886255692079 |
| 25.7424994246103 | 2.08327912910536 |
| 25.7449994245544 | 3.04495582599961 |
| 25.7474994244985 | 2.05780000845296 |
| 25.7499994244426 | 3.04285860689418 |
| 25.7524994243868 | 2.05834742460572 |

|                  |                  |
|------------------|------------------|
| 25.7549994243309 | 3.02925261483522 |
| 25.7574994242750 | 2.07198034852916 |
| 25.7599994242191 | 3.01203421773276 |
| 25.7624994241633 | 2.08219863290921 |
| 25.7649994241074 | 3.01015204372836 |
| 25.7674994240515 | 2.10385917045557 |
| 25.7699994239956 | 3.02342748080949 |
| 25.7724994239397 | 2.14013714350576 |
| 25.7749994238839 | 3.02896928942520 |
| 25.7774994238280 | 2.17427888512697 |
| 25.7799994237721 | 3.03398286233574 |
| 25.7824994237162 | 2.17559825958264 |
| 25.7849994236603 | 3.04927935140715 |
| 25.7874994236045 | 2.15372670912653 |
| 25.7899994235486 | 3.07910105434719 |
| 25.7924994234927 | 2.13510127672623 |
| 25.7949994234368 | 3.08740688515686 |
| 25.7974994233809 | 2.13334100926926 |
| 25.7999994233251 | 3.08092886677654 |
| 25.8024994232692 | 2.12434181784029 |
| 25.8049994232133 | 3.07718412636391 |
| 25.8074994231574 | 2.09696468253760 |
| 25.8099994231015 | 3.09518576542556 |
| 25.8124994230457 | 2.07034796601199 |
| 25.8149994229898 | 3.10371765186429 |
| 25.8174994229339 | 2.07285264994427 |
| 25.8199994228780 | 3.10526982345577 |
| 25.8224994228221 | 2.09730565652339 |
| 25.8249994227663 | 3.10569936337389 |
| 25.8274994227104 | 2.12419955404618 |
| 25.8299994226545 | 3.11995053628323 |
| 25.8324994225986 | 2.14618465881690 |
| 25.8349994225428 | 3.12249992665124 |
| 25.8374994224869 | 2.16877931086337 |
| 25.8399994224310 | 3.10328707173845 |
| 25.8424994223751 | 2.18290110428141 |
| 25.8449994223192 | 3.08748898912401 |
| 25.8474994222634 | 2.18195683183421 |
| 25.8499994222075 | 3.08097575764659 |
| 25.8524994221516 | 2.16699050881009 |
| 25.8549994220957 | 3.07739538723740 |
| 25.8574994220398 | 2.14491855624147 |
| 25.8599994219840 | 3.04229865495303 |
| 25.8624994219281 | 2.11123668852855 |
| 25.8649994218722 | 3.01428813280284 |
| 25.8674994218163 | 2.06878832055602 |
| 25.8699994217604 | 3.00037150960644 |
| 25.8724994217046 | 2.04105868712318 |
| 25.8749994216487 | 3.00600408848458 |
| 25.8774994215928 | 2.04324161436307 |
| 25.8799994215369 | 2.99520915202211 |
| 25.8824994214810 | 2.06252091973876 |

|                  |                  |
|------------------|------------------|
| 25.8849994214252 | 2.99525723143956 |
| 25.8874994213693 | 2.07454545835973 |
| 25.8899994213134 | 3.01556672194448 |
| 25.8924994212575 | 2.09822766230240 |
| 25.8949994212016 | 3.05445303028480 |
| 25.8974994211458 | 2.14486965651435 |
| 25.8999994210899 | 3.06849444788385 |
| 25.9024994210340 | 2.19586731842477 |
| 25.9049994209781 | 3.07337810694015 |
| 25.9074994209222 | 2.20738324127823 |
| 25.9099994208664 | 3.09195707441226 |
| 25.9124994208105 | 2.18385739558859 |
| 25.9149994207546 | 3.12713445709662 |
| 25.9174994206987 | 2.15777441376920 |
| 25.9199994206429 | 3.14097553937642 |
| 25.9224994205870 | 2.15064920490651 |
| 25.9249994205311 | 3.12274529690575 |
| 25.9274994204752 | 2.13639847240467 |
| 25.9299994204193 | 3.10707790789513 |
| 25.9324994203635 | 2.09846763586337 |
| 25.9349994203076 | 3.10744785518052 |
| 25.9374994202517 | 2.06197041906183 |
| 25.9399994201958 | 3.10615734109060 |
| 25.9424994201399 | 2.06145703279064 |
| 25.9449994200841 | 3.07942218402430 |
| 25.9474994200282 | 2.08338652690157 |
| 25.9499994199723 | 3.06445618006801 |
| 25.9524994199164 | 2.10363123537397 |
| 25.9549994198605 | 3.06980093645174 |
| 25.9574994198047 | 2.12048768712530 |
| 25.9599994197488 | 3.08304422313969 |
| 25.9624994196929 | 2.14702408347135 |
| 25.9649994196370 | 3.06083157055611 |
| 25.9674994195811 | 2.17100439364479 |
| 25.9699994195253 | 3.04279122206569 |
| 25.9724994194694 | 2.17862611877784 |
| 25.9749994194135 | 3.03791479382059 |
| 25.9774994193576 | 2.16791710536819 |
| 25.9799994193017 | 3.05052733592554 |
| 25.9824994192459 | 2.14843400436364 |
| 25.9849994191900 | 3.03959186008418 |
| 25.9874994191341 | 2.12204234358884 |
| 25.9899994190782 | 3.02490966548044 |
| 25.9924994190224 | 2.08761913840288 |
| 25.9949994189665 | 3.02418774329207 |
| 25.9974994189106 | 2.06345356839353 |
| 25.9999994188547 | 3.03562110919100 |
| 26.0024994187988 | 2.06124630193750 |
| 26.0049994187430 | 3.04223802912478 |
| 26.0074994186871 | 2.07598793059136 |
| 26.0099994186312 | 3.04198267568292 |
| 26.0124994185753 | 2.08535724895424 |

|                  |                  |
|------------------|------------------|
| 26.0149994185194 | 3.06789312384395 |
| 26.0174994184636 | 2.10443278403089 |
| 26.0199994184077 | 3.10349844470688 |
| 26.0224994183518 | 2.14142888681320 |
| 26.0249994182959 | 3.13100576212357 |
| 26.0274994182400 | 2.18776229605983 |
| 26.0299994181842 | 3.13488532554637 |
| 26.0324994181283 | 2.20823084984972 |
| 26.0349994180724 | 3.14415377625920 |
| 26.0374994180165 | 2.20379734348896 |
| 26.0399994179606 | 3.15517335594037 |
| 26.0424994179048 | 2.19279296336020 |
| 26.0449994178489 | 3.15547355918949 |
| 26.0474994177930 | 2.18816589999867 |
| 26.0499994177371 | 3.13242253426864 |
| 26.0524994176812 | 2.16595935631997 |
| 26.0549994176254 | 3.11127298777735 |
| 26.0574994175695 | 2.11767772891085 |
| 26.0599994175136 | 3.10092193165984 |
| 26.0624994174577 | 2.07109190361534 |
| 26.0649994174019 | 3.08190447545361 |
| 26.0674994173460 | 2.05875733292926 |
| 26.0699994172901 | 3.04439648144341 |
| 26.0724994172342 | 2.06711202232946 |
| 26.0749994171783 | 3.01698748212203 |
| 26.0774994171225 | 2.07172613313778 |
| 26.0799994170666 | 3.02498571153882 |
| 26.0824994170107 | 2.08072370344815 |
| 26.0849994169548 | 3.03636060393129 |
| 26.0874994168989 | 2.10960945980672 |
| 26.0899994168431 | 3.02803564335511 |
| 26.0924994167872 | 2.14571905728826 |
| 26.0949994167313 | 3.02497722107473 |
| 26.0974994166754 | 2.16838059397099 |
| 26.0999994166195 | 3.04511608319256 |
| 26.1024994165637 | 2.17915394562156 |
| 26.1049994165078 | 3.06706955054381 |
| 26.1074994164519 | 2.18177149850414 |
| 26.1099994163960 | 3.06039387521329 |
| 26.1124994163401 | 2.16938273020714 |
| 26.1149994162843 | 3.05146846799652 |
| 26.1174994162284 | 2.13331013212519 |
| 26.1199994161725 | 3.07092835676152 |
| 26.1224994161166 | 2.10006830886093 |
| 26.1249994160607 | 3.09747353978351 |
| 26.1274994160049 | 2.08793973623235 |
| 26.1299994159490 | 3.09475314202054 |
| 26.1324994158931 | 2.08869862425842 |
| 26.1349994158372 | 3.07811512618713 |
| 26.1374994157813 | 2.07609291962306 |
| 26.1399994157255 | 3.09095547578188 |
| 26.1424994156696 | 2.07715497132641 |



|                  |                  |
|------------------|------------------|
| 26.1449994156137 | 3.12121124683431 |
| 26.1474994155578 | 2.11161197479887 |
| 26.1499994155020 | 3.12790433467154 |
| 26.1524994154461 | 2.16128368234829 |
| 26.1549994153902 | 3.11660810497663 |
| 26.1574994153343 | 2.18063704267675 |
| 26.1599994152784 | 3.12149499443151 |
| 26.1624994152226 | 2.17752438569353 |
| 26.1649994151667 | 3.13950551839155 |
| 26.1674994151108 | 2.18204965489010 |
| 26.1699994150549 | 3.13263740024823 |
| 26.1724994149990 | 2.19790083536041 |
| 26.1749994149432 | 3.09451651215582 |
| 26.1774994148873 | 2.18848448365027 |
| 26.1799994148314 | 3.06492177139678 |
| 26.1824994147755 | 2.13925520802568 |
| 26.1849994147196 | 3.05952540841255 |
| 26.1874994146638 | 2.08541861349610 |
| 26.1899994146079 | 3.04996833098673 |
| 26.1924994145520 | 2.06247809210522 |
| 26.1949994144961 | 3.01802026495218 |
| 26.1974994144402 | 2.06156526793429 |
| 26.1999994143844 | 2.99728464448073 |
| 26.2024994143285 | 2.05664605163844 |
| 26.2049994142726 | 3.00740464421052 |
| 26.2074994142167 | 2.06004322090436 |
| 26.2099994141608 | 3.02777967486028 |
| 26.2124994141050 | 2.09000803934028 |
| 26.2149994140491 | 3.02524688819425 |
| 26.2174994139932 | 2.13310013520744 |
| 26.2199994139373 | 3.03536610598755 |
| 26.2224994138815 | 2.16352521341744 |
| 26.2249994138256 | 3.06763536709531 |
| 26.2274994137697 | 2.18247339582548 |
| 26.2299994137138 | 3.10700836886964 |
| 26.2324994136579 | 2.19659396450550 |
| 26.2349994136021 | 3.10900241150276 |
| 26.2374994135462 | 2.19851598483818 |
| 26.2399994134903 | 3.10360924744305 |
| 26.2424994134344 | 2.17523552842376 |
| 26.2449994133785 | 3.11573038529556 |
| 26.2474994133227 | 2.14406590233276 |
| 26.2499994132668 | 3.13502330481497 |
| 26.2524994132109 | 2.12167743495400 |
| 26.2549994131550 | 3.12549159005108 |
| 26.2574994130991 | 2.10523561337419 |
| 26.2599994130433 | 3.09745318609031 |
| 26.2624994129874 | 2.07554429092515 |
| 26.2649994129315 | 3.10029547204875 |
| 26.2674994128756 | 2.06052848360220 |
| 26.2699994128197 | 3.11026411946478 |
| 26.2724994127639 | 2.08362729341910 |

|                  |                  |
|------------------|------------------|
| 26.2749994127080 | 3.10265247002238 |
| 26.2774994126521 | 2.12869984393761 |
| 26.2799994125962 | 3.07087824683640 |
| 26.2824994125403 | 2.14853054334841 |
| 26.2849994124845 | 3.07450885272120 |
| 26.2874994124286 | 2.15247383767469 |
| 26.2899994123727 | 3.08858506302562 |
| 26.2924994123168 | 2.16698236902057 |
| 26.2949994122609 | 3.08615329214688 |
| 26.2974994122051 | 2.19161676770758 |
| 26.2999994121492 | 3.04782018209835 |
| 26.3024994120933 | 2.18870697069388 |
| 26.3049994120374 | 3.03024178180488 |
| 26.3074994119816 | 2.14801671299760 |
| 26.3099994119257 | 3.03461634788419 |
| 26.3124994118698 | 2.10598666684431 |
| 26.3149994118139 | 3.03368101804689 |
| 26.3174994117580 | 2.08654004860247 |
| 26.3199994117022 | 3.01007722670383 |
| 26.3224994116463 | 2.07507824961879 |
| 26.3249994115904 | 3.00428089038375 |
| 26.3274994115345 | 2.05013704124212 |
| 26.3299994114786 | 3.03566154669999 |
| 26.3324994114228 | 2.04631991130468 |
| 26.3349994113669 | 3.06103444446187 |
| 26.3374994113110 | 2.08266618884496 |
| 26.3399994112551 | 3.06030232846920 |
| 26.3424994111992 | 2.13515423313563 |
| 26.3449994111434 | 3.06467930656717 |
| 26.3474994110875 | 2.16517094432634 |
| 26.3499994110316 | 3.11032560170507 |
| 26.3524994109757 | 2.18451479530833 |
| 26.3549994109198 | 3.15145532195492 |
| 26.3574994108640 | 2.20458490014538 |
| 26.3599994108081 | 3.15649002590298 |
| 26.3624994107522 | 2.21773330089734 |
| 26.3649994106963 | 3.13983579183434 |
| 26.3674994106404 | 2.20395477923300 |
| 26.3699994105846 | 3.14597176550649 |
| 26.3724994105287 | 2.17776761269631 |
| 26.3749994104728 | 3.14910835225116 |
| 26.3774994104169 | 2.15144197971430 |
| 26.3799994103611 | 3.12449242437520 |
| 26.3824994103052 | 2.12189597058927 |
| 26.3849994102493 | 3.07963152810787 |
| 26.3874994101934 | 2.07615557635405 |
| 26.3899994101375 | 3.07235424745813 |
| 26.3924994100817 | 2.04496458140233 |
| 26.3949994100258 | 3.07755689717737 |
| 26.3974994099699 | 2.05542409997596 |
| 26.3999994099140 | 3.06164275093045 |
| 26.4024994098581 | 2.09155987564067 |

|                  |                  |
|------------------|------------------|
| 26.4049994098023 | 3.02464928876010 |
| 26.4074994097464 | 2.11404863921197 |
| 26.4099994096905 | 3.02082648297200 |
| 26.4124994096346 | 2.13006364038660 |
| 26.4149994095787 | 3.04089700728009 |
| 26.4174994095229 | 2.16029335858675 |
| 26.4199994094670 | 3.04548464626355 |
| 26.4224994094111 | 2.19119769558705 |
| 26.4249994093552 | 3.03298394101617 |
| 26.4274994092993 | 2.19181827615088 |
| 26.4299994092435 | 3.03780740095764 |
| 26.4324994091876 | 2.15763554760159 |
| 26.4349994091317 | 3.06175324245048 |
| 26.4374994090758 | 2.13020079261580 |
| 26.4399994090199 | 3.06293539093547 |
| 26.4424994089641 | 2.12071951741337 |
| 26.4449994089082 | 3.04392285533405 |
| 26.4474994088523 | 2.10937096938163 |
| 26.4499994087964 | 3.03969341623543 |
| 26.4524994087406 | 2.06810740398365 |
| 26.4549994086847 | 3.07697174019717 |
| 26.4574994086288 | 2.04382224602483 |
| 26.4599994085729 | 3.10258673503997 |
| 26.4624994085170 | 2.06752413876912 |
| 26.4649994084612 | 3.10005303429635 |
| 26.4674994084053 | 2.11855099721933 |
| 26.4699994083494 | 3.10143071113011 |
| 26.4724994082935 | 2.15152049291379 |
| 26.4749994082376 | 3.13306050865492 |
| 26.4774994081818 | 2.17830289465239 |
| 26.4799994081259 | 3.15751847938995 |
| 26.4824994080700 | 2.20811572029412 |
| 26.4849994080141 | 3.14088615836662 |
| 26.4874994079582 | 2.22657039635535 |
| 26.4899994079024 | 3.12513019848406 |
| 26.4924994078465 | 2.21248593833226 |
| 26.4949994077906 | 3.13195780969891 |
| 26.4974994077347 | 2.18326477783365 |
| 26.4999994076788 | 3.13829839793510 |
| 26.5024994076230 | 2.15980155936442 |
| 26.5049994075671 | 3.09889409028027 |
| 26.5074994075112 | 2.13226773260442 |
| 26.5099994074553 | 3.04283796300789 |
| 26.5124994073994 | 2.08413831992673 |
| 26.5149994073436 | 3.02356853820994 |
| 26.5174994072877 | 2.04103115790744 |
| 26.5199994072318 | 3.03114792006015 |
| 26.5224994071759 | 2.03747729487177 |
| 26.5249994071200 | 3.02098586243812 |
| 26.5274994070642 | 2.05979350947079 |
| 26.5299994070083 | 2.99489962732994 |
| 26.5324994069524 | 2.07682525298639 |

|                  |                  |
|------------------|------------------|
| 26.5349994068965 | 3.01149735814130 |
| 26.5374994068407 | 2.09956361985128 |
| 26.5399994067848 | 3.04433819858865 |
| 26.5424994067289 | 2.15040563166999 |
| 26.5449994066730 | 3.06131510764998 |
| 26.5474994066171 | 2.20325694256730 |
| 26.5499994065613 | 3.04675370415480 |
| 26.5524994065054 | 2.22045189026513 |
| 26.5549994064495 | 3.06373353987076 |
| 26.5574994063936 | 2.19428936224487 |
| 26.5599994063377 | 3.10253758783903 |
| 26.5624994062819 | 2.16980235044877 |
| 26.5649994062260 | 3.12789507184161 |
| 26.5674994061701 | 2.15825078353814 |
| 26.5699994061142 | 3.11032833017529 |
| 26.5724994060583 | 2.14183348419549 |
| 26.5749994060025 | 3.09786032802820 |
| 26.5774994059466 | 2.09547489527362 |
| 26.5799994058907 | 3.11035526559781 |
| 26.5824994058348 | 2.06097820523896 |
| 26.5849994057789 | 3.11778649365684 |
| 26.5874994057231 | 2.06473347168999 |
| 26.5899994056672 | 3.09883527395536 |
| 26.5924994056113 | 2.09408987139019 |
| 26.5949994055554 | 3.08773611545190 |
| 26.5974994054995 | 2.10928104001648 |
| 26.5999994054437 | 3.11231066148240 |
| 26.6024994053878 | 2.12602615360042 |
| 26.6049994053319 | 3.12901372165767 |
| 26.6074994052760 | 2.16106466916795 |
| 26.6099994052202 | 3.11188971192827 |
| 26.6124994051643 | 2.20020004175189 |
| 26.6149994051084 | 3.08084019876786 |
| 26.6174994050525 | 2.21283412764943 |
| 26.6199994049966 | 3.07910043281816 |
| 26.6224994049408 | 2.20031308925207 |
| 26.6249994048849 | 3.07777839364500 |
| 26.6274994048290 | 2.17740829613304 |
| 26.6299994047731 | 3.05767829592928 |
| 26.6324994047172 | 2.14256063213483 |
| 26.6349994046614 | 3.02427945672585 |
| 26.6374994046055 | 2.09441467555902 |
| 26.6399994045496 | 3.02394281540525 |
| 26.6424994044937 | 2.05338036699706 |
| 26.6449994044378 | 3.02474212488238 |
| 26.6474994043820 | 2.04621654714573 |
| 26.6499994043261 | 3.01382208498461 |
| 26.6524994042702 | 2.05545836973995 |
| 26.6549994042143 | 2.99276932250683 |
| 26.6574994041584 | 2.06155375241903 |
| 26.6599994041026 | 3.01940584968649 |
| 26.6624994040467 | 2.07871212260909 |

|                  |                  |
|------------------|------------------|
| 26.6649994039908 | 3.06262366439022 |
| 26.6674994039349 | 2.13190911785048 |
| 26.6699994038790 | 3.08875245857628 |
| 26.6724994038232 | 2.18730463131636 |
| 26.6749994037673 | 3.09455760572315 |
| 26.6774994037114 | 2.21059367381434 |
| 26.6799994036555 | 3.11866234192001 |
| 26.6824994035996 | 2.20457243314639 |
| 26.6849994035438 | 3.15206822280642 |
| 26.6874994034879 | 2.20955184482125 |
| 26.6899994034320 | 3.15470106294162 |
| 26.6924994033761 | 2.21306526669098 |
| 26.6949994033203 | 3.13558184038258 |
| 26.6974994032644 | 2.18966151804086 |
| 26.6999994032085 | 3.12407474319373 |
| 26.7024994031526 | 2.12576781757769 |
| 26.7049994030967 | 3.13926598037280 |
| 26.7074994030409 | 2.07631872103634 |
| 26.7099994029850 | 3.12720514132412 |
| 26.7124994029291 | 2.06584874713760 |
| 26.7149994028732 | 3.09110707714404 |
| 26.7174994028173 | 2.07946358441714 |
| 26.7199994027615 | 3.05681637285232 |
| 26.7224994027056 | 2.07942732498998 |
| 26.7249994026497 | 3.06375804213812 |
| 26.7274994025938 | 2.08533418786990 |
| 26.7299994025379 | 3.06639468002359 |
| 26.7324994024821 | 2.11289649993770 |
| 26.7349994024262 | 3.04883167461816 |
| 26.7374994023703 | 2.14920785095463 |
| 26.7399994023144 | 3.03431349471079 |
| 26.7424994022585 | 2.17196102876686 |
| 26.7449994022027 | 3.04279360945924 |
| 26.7474994021468 | 2.17846400907474 |
| 26.7499994020909 | 3.05383507146097 |
| 26.7524994020350 | 2.17935267253696 |
| 26.7549994019791 | 3.03547806309237 |
| 26.7574994019233 | 2.16225815962410 |
| 26.7599994018674 | 3.01777042496443 |
| 26.7624994018115 | 2.12807531176155 |
| 26.7649994017556 | 3.02544356206854 |
| 26.7674994016998 | 2.08734864921891 |
| 26.7699994016439 | 3.05263329449395 |
| 26.7724994015880 | 2.07281001741838 |
| 26.7749994015321 | 3.05396551204135 |
| 26.7774994014762 | 2.06929182043737 |
| 26.7799994014204 | 3.04617227532965 |
| 26.7824994013645 | 2.06747135499890 |
| 26.7849994013086 | 3.06183240867230 |
| 26.7874994012527 | 2.07603832762717 |
| 26.7899994011968 | 3.09780881229507 |
| 26.7924994011410 | 2.12147249195789 |

|                  |                  |
|------------------|------------------|
| 26.7949994010851 | 3.11661491942476 |
| 26.7974994010292 | 2.17049665646322 |
| 26.7999994009733 | 3.11737026586031 |
| 26.8024994009174 | 2.19345780733116 |
| 26.8049994008616 | 3.13704335762578 |
| 26.8074994008057 | 2.19087366668847 |
| 26.8099994007498 | 3.16343946889157 |
| 26.8124994006939 | 2.20050732304098 |
| 26.8149994006380 | 3.16668825363960 |
| 26.8174994005822 | 2.21295474422434 |
| 26.8199994005263 | 3.13298480827214 |
| 26.8224994004704 | 2.20025315320397 |
| 26.8249994004145 | 3.11059921615032 |
| 26.8274994003586 | 2.14767795563976 |
| 26.8299994003028 | 3.10182862337332 |
| 26.8324994002469 | 2.09810694547347 |
| 26.8349994001910 | 3.08842094699978 |
| 26.8374994001351 | 2.07344595861406 |
| 26.8399994000793 | 3.04864685307006 |
| 26.8424994000234 | 2.06341382682849 |
| 26.8449993999675 | 3.02674801914034 |
| 26.8474993999116 | 2.05109671986745 |
| 26.8499993998557 | 3.02557673734397 |
| 26.8524993997999 | 2.05689152715086 |
| 26.8549993997440 | 3.02555856893731 |
| 26.8574993996881 | 2.09185457004592 |
| 26.8599993996322 | 3.00549018551783 |
| 26.8624993995763 | 2.13095189815819 |
| 26.8649993995205 | 3.00711124668476 |
| 26.8674993994646 | 2.15696078412984 |
| 26.8699993994087 | 3.03763415540927 |
| 26.8724993993528 | 2.16991208735124 |
| 26.8749993992969 | 3.06445601188090 |
| 26.8774993992411 | 2.18513004675328 |
| 26.8799993991852 | 3.06513397400995 |
| 26.8824993991293 | 2.18337260256764 |
| 26.8849993990734 | 3.06194494193903 |
| 26.8874993990175 | 2.16277132282357 |
| 26.8899993989617 | 3.08415062153537 |
| 26.8924993989058 | 2.13191330092502 |
| 26.8949993988499 | 3.09942482233865 |
| 26.8974993987940 | 2.11569779855654 |
| 26.8999993987381 | 3.09686094089031 |
| 26.9024993986823 | 2.09589362624466 |
| 26.9049993986264 | 3.08237910671627 |
| 26.9074993985705 | 2.07382756378755 |
| 26.9099993985146 | 3.10510777353412 |
| 26.9124993984587 | 2.06820630575144 |
| 26.9149993984029 | 3.11981602599352 |
| 26.9174993983470 | 2.09968252193659 |
| 26.9199993982911 | 3.12270096500610 |
| 26.9224993982352 | 2.13681848972836 |



|                  |                  |
|------------------|------------------|
| 26.9249993981794 | 3.10353313748927 |
| 26.9274993981235 | 2.15718587837650 |
| 26.9299993980676 | 3.11505339539357 |
| 26.9324993980117 | 2.16587012492001 |
| 26.9349993979558 | 3.12436017721341 |
| 26.9374993979000 | 2.18595580758326 |
| 26.9399993978441 | 3.12031553273992 |
| 26.9424993977882 | 2.19998928981620 |
| 26.9449993977323 | 3.09062002876866 |
| 26.9474993976764 | 2.18566362425008 |
| 26.9499993976206 | 3.07322939582860 |
| 26.9524993975647 | 2.14413334720255 |
| 26.9549993975088 | 3.06442532955642 |
| 26.9574993974529 | 2.11150638739100 |
| 26.9599993973970 | 3.04283799798839 |
| 26.9624993973412 | 2.09380234320721 |
| 26.9649993972853 | 3.01434462608956 |
| 26.9674993972294 | 2.07398341943662 |
| 26.9699993971735 | 2.99856448456824 |
| 26.9724993971176 | 2.04690106136618 |
| 26.9749993970618 | 3.01471387532499 |
| 26.9774993970059 | 2.04270187305980 |
| 26.9799993969500 | 3.01912128350585 |
| 26.9824993968941 | 2.07646764749996 |
| 26.9849993968382 | 3.02294960372647 |
| 26.9874993967824 | 2.12119392235175 |
| 26.9899993967265 | 3.03081777697918 |
| 26.9924993966706 | 2.15614664914263 |
| 26.9949993966147 | 3.07141836004980 |
| 26.9974993965589 | 2.17659818152777 |
| 26.9999993965030 | 3.09621940625564 |
| 27.0024993964471 | 2.19555551923904 |
| 27.0049993963912 | 3.10960942534750 |
| 27.0074993963353 | 2.19860747007373 |
| 27.0099993962795 | 3.11627233220734 |
| 27.0124993962236 | 2.18996034619899 |
| 27.0149993961677 | 3.13722526228975 |
| 27.0174993961118 | 2.16902647800667 |
| 27.0199993960559 | 3.14135388540896 |
| 27.0224993960001 | 2.14971894873493 |
| 27.0249993959442 | 3.12165013810469 |
| 27.0274993958883 | 2.11552862459221 |
| 27.0299993958324 | 3.10308094619605 |
| 27.0324993957765 | 2.08188206691758 |
| 27.0349993957207 | 3.10607889798778 |
| 27.0374993956648 | 2.06568821880627 |
| 27.0399993956089 | 3.10819643623919 |
| 27.0424993955530 | 2.08421425570237 |
| 27.0449993954971 | 3.08484486488203 |
| 27.0474993954413 | 2.10289746103656 |
| 27.0499993953854 | 3.06558611841928 |
| 27.0524993953295 | 2.11151789068457 |

|                  |                  |
|------------------|------------------|
| 27.0549993952736 | 3.07052127144692 |
| 27.0574993952177 | 2.12679538280038 |
| 27.0599993951619 | 3.07864059407915 |
| 27.0624993951060 | 2.16569915260661 |
| 27.0649993950501 | 3.05911327902319 |
| 27.0674993949942 | 2.19581483821633 |
| 27.0699993949383 | 3.03694939734333 |
| 27.0724993948825 | 2.18448729584816 |
| 27.0749993948266 | 3.04028588636940 |
| 27.0774993947707 | 2.14863650218784 |
| 27.0799993947148 | 3.05224567556316 |
| 27.0824993946590 | 2.12709822613273 |
| 27.0849993946031 | 3.03790639337077 |
| 27.0874993945472 | 2.12314370289766 |
| 27.0899993944913 | 3.01128847486288 |
| 27.0924993944354 | 2.09975347612738 |
| 27.0949993943796 | 3.01456415588489 |
| 27.0974993943237 | 2.06191811672215 |
| 27.0999993942678 | 3.04088217374860 |
| 27.1024993942119 | 2.04693267018752 |
| 27.1049993941560 | 3.05208094020653 |
| 27.1074993941002 | 2.07449963414097 |
| 27.1099993940443 | 3.04846832897358 |
| 27.1124993939884 | 2.10663813412199 |
| 27.1149993939325 | 3.07253249553752 |
| 27.1174993938766 | 2.13442260721208 |
| 27.1199993938208 | 3.11420780030588 |
| 27.1224993937649 | 2.16136199908507 |
| 27.1249993937090 | 3.13748372789071 |
| 27.1274993936531 | 2.19479184806715 |
| 27.1299993935972 | 3.12981589392763 |
| 27.1324993935414 | 2.20746956204723 |
| 27.1349993934855 | 3.13596063895021 |
| 27.1374993934296 | 2.20378513248025 |
| 27.1399993933737 | 3.15377362382670 |
| 27.1424993933178 | 2.18848295670266 |
| 27.1449993932620 | 3.15627899839811 |
| 27.1474993932061 | 2.17419531581802 |
| 27.1499993931502 | 3.12283194269608 |
| 27.1524993930943 | 2.14140720541283 |
| 27.1549993930385 | 3.09146050333657 |
| 27.1574993929826 | 2.10023879564991 |
| 27.1599993929267 | 3.08291453726453 |
| 27.1624993928708 | 2.07054072665331 |
| 27.1649993928149 | 3.07092835169448 |
| 27.1674993927591 | 2.06968171773560 |
| 27.1699993927032 | 3.04196993295480 |
| 27.1724993926473 | 2.07415888649279 |
| 27.1749993925914 | 3.01491569421700 |
| 27.1774993925355 | 2.07391759177191 |
| 27.1799993924797 | 3.02889011642912 |
| 27.1824993924238 | 2.09168093159664 |

|                  |                  |
|------------------|------------------|
| 27.1849993923679 | 3.03688440071218 |
| 27.1874993923120 | 2.13445876972337 |
| 27.1899993922561 | 3.03422280856598 |
| 27.1924993922003 | 2.17658022432485 |
| 27.1949993921444 | 3.01781387069001 |
| 27.1974993920885 | 2.18210280511712 |
| 27.1999993920326 | 3.04091991501059 |
| 27.2024993919767 | 2.16908332199273 |
| 27.2049993919209 | 3.06029009444954 |
| 27.2074993918650 | 2.15852649388165 |
| 27.2099993918091 | 3.06790976223291 |
| 27.2124993917532 | 2.15629482520480 |
| 27.2149993916973 | 3.05541077014924 |
| 27.2174993916415 | 2.12793167928367 |
| 27.2199993915856 | 3.07025123288795 |
| 27.2224993915297 | 2.08683639690537 |
| 27.2249993914738 | 3.09073154933035 |
| 27.2274993914180 | 2.06780916870489 |
| 27.2299993913621 | 3.08949028060132 |
| 27.2324993913062 | 2.08532184808796 |
| 27.2349993912503 | 3.07809580164020 |
| 27.2374993911944 | 2.09856084211133 |
| 27.2399993911386 | 3.09429327735220 |
| 27.2424993910827 | 2.10384901713407 |
| 27.2449993910268 | 3.13573598343451 |
| 27.2474993909709 | 2.12536837706408 |
| 27.2499993909150 | 3.14130007359787 |
| 27.2524993908592 | 2.16786254494998 |
| 27.2549993908033 | 3.12666992843073 |
| 27.2574993907474 | 2.19619651565815 |
| 27.2599993906915 | 3.11620906068848 |
| 27.2624993906356 | 2.20178009854345 |
| 27.2649993905798 | 3.13559333729137 |
| 27.2674993905239 | 2.19758085637457 |
| 27.2699993904680 | 3.12186667622994 |
| 27.2724993904121 | 2.19091761578408 |
| 27.2749993903562 | 3.08518089038082 |
| 27.2774993903004 | 2.16105317788665 |
| 27.2799993902445 | 3.05302775197246 |
| 27.2824993901886 | 2.11270726151495 |
| 27.2849993901327 | 3.05854289549795 |
| 27.2874993900768 | 2.07665915586935 |
| 27.2899993900210 | 3.04504589532588 |
| 27.2924993899651 | 2.06709267937700 |
| 27.2949993899092 | 3.00623987731202 |
| 27.2974993898533 | 2.05959603105318 |
| 27.2999993897974 | 2.97719082276078 |
| 27.3024993897416 | 2.04710332074837 |
| 27.3049993896857 | 3.00309022796935 |
| 27.3074993896298 | 2.06382328290821 |
| 27.3099993895739 | 3.03221896161837 |
| 27.3124993895181 | 2.11181360542899 |

|                  |                  |
|------------------|------------------|
| 27.3149993894622 | 3.03768004115987 |
| 27.3174993894063 | 2.15711708032295 |
| 27.3199993893504 | 3.04175119235088 |
| 27.3224993892945 | 2.16888942599525 |
| 27.3249993892387 | 3.08049876213999 |
| 27.3274993891828 | 2.17707492191541 |
| 27.3299993891269 | 3.11563867068343 |
| 27.3324993890710 | 2.19645488659180 |
| 27.3349993890151 | 3.11425288198935 |
| 27.3374993889593 | 2.21146815984540 |
| 27.3399993889034 | 3.10201959691827 |
| 27.3424993888475 | 2.18126635640951 |
| 27.3449993887916 | 3.11742243318900 |
| 27.3474993887357 | 2.12717103968745 |
| 27.3499993886799 | 3.14481718857520 |
| 27.3524993886240 | 2.09458494834394 |
| 27.3549993885681 | 3.13268156483307 |
| 27.3574993885122 | 2.09776597917237 |
| 27.3599993884563 | 3.10238053090752 |
| 27.3624993884005 | 2.09640747103181 |
| 27.3649993883446 | 3.09242777369836 |
| 27.3674993882887 | 2.08250505411776 |
| 27.3699993882328 | 3.11055876400688 |
| 27.3724993881769 | 2.08712249718961 |
| 27.3749993881211 | 3.10139628910947 |
| 27.3774993880652 | 2.12040488874979 |
| 27.3799993880093 | 3.07624901972207 |
| 27.3824993879534 | 2.15015900754851 |
| 27.3849993878976 | 3.07002109787620 |
| 27.3874993878417 | 2.16265968858302 |
| 27.3899993877858 | 3.08646462942377 |
| 27.3924993877299 | 2.17200758542437 |
| 27.3949993876740 | 3.07703497495397 |
| 27.3974993876182 | 2.18206621486700 |
| 27.3999993875623 | 3.04008700658320 |
| 27.4024993875064 | 2.17150327413016 |
| 27.4049993874505 | 3.01755384152015 |
| 27.4074993873946 | 2.13663457900877 |
| 27.4099993873388 | 3.02716987572881 |
| 27.4124993872829 | 2.10234390106709 |
| 27.4149993872270 | 3.03230234470740 |
| 27.4174993871711 | 2.08312898534632 |
| 27.4199993871152 | 3.01100475650139 |
| 27.4224993870594 | 2.06470004644960 |
| 27.4249993870035 | 3.00058374582564 |
| 27.4274993869476 | 2.04270045189426 |
| 27.4299993868917 | 3.03125786937271 |
| 27.4324993868358 | 2.05516756902838 |
| 27.4349993867800 | 3.06182887800021 |
| 27.4374993867241 | 2.10519416034009 |
| 27.4399993866682 | 3.06897723847701 |
| 27.4424993866123 | 2.15332238930821 |

|                  |                  |
|------------------|------------------|
| 27.4449993865564 | 3.07435663481744 |
| 27.4474993865006 | 2.16438843793715 |
| 27.4499993864447 | 3.12290400133610 |
| 27.4524993863888 | 2.17497257197487 |
| 27.4549993863329 | 3.16190253188345 |
| 27.4574993862770 | 2.20419918441732 |
| 27.4599993862212 | 3.16444237671347 |
| 27.4624993861653 | 2.23289621449901 |
| 27.4649993861094 | 3.13707246285832 |
| 27.4674993860535 | 2.21382857543645 |
| 27.4699993859977 | 3.13886802204011 |
| 27.4724993859418 | 2.16316992572683 |
| 27.4749993858859 | 3.14879668760068 |
| 27.4774993858300 | 2.12435120947597 |
| 27.4799993857741 | 3.13010888197775 |
| 27.4824993857183 | 2.11133159699702 |
| 27.4849993856624 | 3.08479651384301 |
| 27.4874993856065 | 2.08972870802743 |
| 27.4899993855506 | 3.06416876642606 |
| 27.4924993854947 | 2.05284735246365 |
| 27.4949993854389 | 3.07193063810546 |
| 27.4974993853830 | 2.04484999759713 |
| 27.4999993853271 | 3.05521213991975 |
| 27.5024993852712 | 2.07826704065815 |
| 27.5049993852153 | 3.02139502392272 |
| 27.5074993851595 | 2.11940297094158 |
| 27.5099993851036 | 3.00961994451858 |
| 27.5124993850477 | 2.14069502870703 |
| 27.5149993849918 | 3.04077107987727 |
| 27.5174993849359 | 2.15804864346914 |
| 27.5199993848801 | 3.05101609389544 |
| 27.5224993848242 | 2.17616389942440 |
| 27.5249993847683 | 3.04180930613163 |
| 27.5274993847124 | 2.18249965315392 |
| 27.5299993846565 | 3.02958356604633 |
| 27.5324993846007 | 2.16527582766007 |
| 27.5349993845448 | 3.05068502234285 |
| 27.5374993844889 | 2.14185558309168 |
| 27.5399993844330 | 3.06068662873562 |
| 27.5424993843772 | 2.11903851433002 |
| 27.5449993843213 | 3.05095040332386 |
| 27.5474993842654 | 2.09027491521235 |
| 27.5499993842095 | 3.04445220459806 |
| 27.5524993841536 | 2.05648723314539 |
| 27.5549993840978 | 3.07834147775080 |
| 27.5574993840419 | 2.05422886934879 |
| 27.5599993839860 | 3.10586779586398 |
| 27.5624993839301 | 2.09076683770596 |
| 27.5649993838742 | 3.10816087279101 |
| 27.5674993838184 | 2.13135294641549 |
| 27.5699993837625 | 3.10232958155464 |
| 27.5724993837066 | 2.14789319266927 |



|                  |                  |
|------------------|------------------|
| 27.5749993836507 | 3.12968581102289 |
| 27.5774993835948 | 2.16769402729398 |
| 27.5799993835390 | 3.15540854460116 |
| 27.5824993834831 | 2.20279093668850 |
| 27.5849993834272 | 3.15118745077994 |
| 27.5874993833713 | 2.22832811526063 |
| 27.5899993833154 | 3.13173126807043 |
| 27.5924993832596 | 2.21092551606313 |
| 27.5949993832037 | 3.12599914631018 |
| 27.5974993831478 | 2.16999048122221 |
| 27.5999993830919 | 3.12478971002706 |
| 27.6024993830360 | 2.14176157883482 |
| 27.6049993829802 | 3.08610326286646 |
| 27.6074993829243 | 2.12441086806060 |
| 27.6099993828684 | 3.04054135308386 |
| 27.6124993828125 | 2.08909302137961 |
| 27.6149993827567 | 3.01931812183115 |
| 27.6174993827008 | 2.03847130017447 |
| 27.6199993826449 | 3.03197027435313 |
| 27.6224993825890 | 2.02287007290953 |
| 27.6249993825331 | 3.01787800452702 |
| 27.6274993824773 | 2.05267154704132 |
| 27.6299993824214 | 3.00106861413164 |
| 27.6324993823655 | 2.09677480167113 |
| 27.6349993823096 | 3.00512951681654 |
| 27.6374993822537 | 2.13029732446553 |
| 27.6399993821979 | 3.04376702159626 |
| 27.6424993821420 | 2.16680586153028 |
| 27.6449993820861 | 3.05700870566801 |
| 27.6474993820302 | 2.19861131718387 |
| 27.6499993819743 | 3.05627749066033 |
| 27.6524993819185 | 2.20876040652557 |
| 27.6549993818626 | 3.07352735002017 |
| 27.6574993818067 | 2.19147287617210 |
| 27.6599993817508 | 3.11150423435627 |
| 27.6624993816949 | 2.17189725438452 |
| 27.6649993816391 | 3.12604217353557 |
| 27.6674993815832 | 2.15539096615394 |
| 27.6699993815273 | 3.10117435355076 |
| 27.6724993814714 | 2.12453596610672 |
| 27.6749993814155 | 3.08843031760326 |
| 27.6774993813597 | 2.07921654146892 |
| 27.6799993813038 | 3.10405675483181 |
| 27.6824993812479 | 2.05782614921208 |
| 27.6849993811920 | 3.12182953895612 |
| 27.6874993811361 | 2.07404058245011 |
| 27.6899993810803 | 3.10752706868114 |
| 27.6924993810244 | 2.09626893902476 |
| 27.6949993809685 | 3.09781140024066 |
| 27.6974993809126 | 2.10543414023522 |
| 27.6999993808568 | 3.11416040551205 |
| 27.7024993808009 | 2.13225544130552 |



|                  |                  |
|------------------|------------------|
| 27.7049993807450 | 3.12800402171065 |
| 27.7074993806891 | 2.18337654662452 |
| 27.7099993806332 | 3.10833321671953 |
| 27.7124993805774 | 2.22275932750939 |
| 27.7149993805215 | 3.07858026640658 |
| 27.7174993804656 | 2.21619723102864 |
| 27.7199993804097 | 3.07526995796206 |
| 27.7224993803538 | 2.18164018200573 |
| 27.7249993802980 | 3.08257426255995 |
| 27.7274993802421 | 2.15399815204215 |
| 27.7299993801862 | 3.06238659897048 |
| 27.7324993801303 | 2.13261433366584 |
| 27.7349993800744 | 3.02355950288894 |
| 27.7374993800186 | 2.09683728950555 |
| 27.7399993799627 | 3.00515440750055 |
| 27.7424993799068 | 2.04786251972245 |
| 27.7449993798509 | 3.01087331735545 |
| 27.7474993797950 | 2.02709644068801 |
| 27.7499993797392 | 3.00942202573135 |
| 27.7524993796833 | 2.04427163889147 |
| 27.7549993796274 | 3.00268815880604 |
| 27.7574993795715 | 2.07841787236566 |
| 27.7599993795156 | 3.02706818504209 |
| 27.7624993794598 | 2.10846887238181 |
| 27.7649993794039 | 3.07661166837334 |
| 27.7674993793480 | 2.14948981968955 |
| 27.7699993792921 | 3.10290466781128 |
| 27.7724993792363 | 2.19477935519131 |
| 27.7749993791804 | 3.10712244471714 |
| 27.7774993791245 | 2.22647996012113 |
| 27.7799993790686 | 3.11912236851971 |
| 27.7824993790127 | 2.22998793529046 |
| 27.7849993789569 | 3.14920508006068 |
| 27.7874993789010 | 2.21909443006669 |
| 27.7899993788451 | 3.15790464693426 |
| 27.7924993787892 | 2.19633703999090 |
| 27.7949993787333 | 3.14080247062021 |
| 27.7974993786775 | 2.15603421985969 |
| 27.7999993786216 | 3.12639303096492 |
| 27.8024993785657 | 2.10480489694841 |
| 27.8049993785098 | 3.12797108431232 |
| 27.8074993784539 | 2.07359495706683 |
| 27.8099993783981 | 3.11135568605471 |
| 27.8124993783422 | 2.06967658922475 |
| 27.8149993782863 | 3.07447141836446 |
| 27.8174993782304 | 2.06816991350832 |
| 27.8199993781745 | 3.05007709304355 |
| 27.8224993781187 | 2.06433515264964 |
| 27.8249993780628 | 3.06255556383505 |
| 27.8274993780069 | 2.08767268708220 |
| 27.8299993779510 | 3.06616980016339 |
| 27.8324993778951 | 2.14023219976455 |

|                  |                  |
|------------------|------------------|
| 27.8349993778393 | 3.04926440878944 |
| 27.8374993777834 | 2.18168315737872 |
| 27.8399993777275 | 3.03545399637039 |
| 27.8424993776716 | 2.19021808386768 |
| 27.8449993776157 | 3.04350689558772 |
| 27.8474993775599 | 2.18411117763977 |
| 27.8499993775040 | 3.05112782877250 |
| 27.8524993774481 | 2.18399233805547 |
| 27.8549993773922 | 3.03399785843761 |
| 27.8574993773364 | 2.16912675854801 |
| 27.8599993772805 | 3.02281892579311 |
| 27.8624993772246 | 2.12407565663067 |
| 27.8649993771687 | 3.03321851250549 |
| 27.8674993771128 | 2.06966999685481 |
| 27.8699993770570 | 3.05495472784557 |
| 27.8724993770011 | 2.05127995564867 |
| 27.8749993769452 | 3.04667725192036 |
| 27.8774993768893 | 2.06239514217839 |
| 27.8799993768334 | 3.04266330506860 |
| 27.8824993767776 | 2.07692532382342 |
| 27.8849993767217 | 3.06484855907580 |
| 27.8874993766658 | 2.08986029256599 |
| 27.8899993766099 | 3.11164279375911 |
| 27.8924993765540 | 2.12575558674039 |
| 27.8949993764982 | 3.12593173388863 |
| 27.8974993764423 | 2.17165668920412 |
| 27.8999993763864 | 3.13162168675369 |
| 27.9024993763305 | 2.20591399742125 |
| 27.9049993762746 | 3.14319872195253 |
| 27.9074993762188 | 2.21968553273972 |
| 27.9099993761629 | 3.16591560483488 |
| 27.9124993761070 | 2.22477042474521 |
| 27.9149993760511 | 3.15795543441275 |
| 27.9174993759952 | 2.21558401265693 |
| 27.9199993759394 | 3.12503685065168 |
| 27.9224993758835 | 2.18174284930259 |
| 27.9249993758276 | 3.10700210845342 |
| 27.9274993757717 | 2.13292279634519 |
| 27.9299993757159 | 3.10118138720343 |
| 27.9324993756600 | 2.09286168246972 |
| 27.9349993756041 | 3.08465488749730 |
| 27.9374993755482 | 2.07097011002115 |
| 27.9399993754923 | 3.03647856349242 |
| 27.9424993754365 | 2.05044203119669 |
| 27.9449993753806 | 3.01363882013655 |
| 27.9474993753247 | 2.04060802805193 |
| 27.9499993752688 | 3.01337619893717 |
| 27.9524993752129 | 2.06210093452382 |
| 27.9549993751571 | 3.02270772618988 |
| 27.9574993751012 | 2.11280107499050 |
| 27.9599993750453 | 3.01061226917948 |
| 27.9624993749894 | 2.15070212103141 |

|                  |                  |
|------------------|------------------|
| 27.9649993749335 | 3.02283478370370 |
| 27.9674993748777 | 2.16547772254069 |
| 27.9699993748218 | 3.05008396799580 |
| 27.9724993747659 | 2.17634249951335 |
| 27.9749993747100 | 3.07559604041265 |
| 27.9774993746541 | 2.19890432314960 |
| 27.9799993745983 | 3.06585544256281 |
| 27.9824993745424 | 2.20304199165018 |
| 27.9849993744865 | 3.06324845804989 |
| 27.9874993744306 | 2.16679432181876 |
| 27.9899993743747 | 3.08358913231465 |
| 27.9924993743189 | 2.11321446200806 |
| 27.9949993742630 | 3.10455091455383 |
| 27.9974993742071 | 2.08720460860477 |
| 27.9999993741512 | 3.09964925830714 |
| 28.0024993740954 | 2.08528911802896 |
| 28.0049993740395 | 3.08856210326310 |
| 28.0074993739836 | 2.07908323221703 |
| 28.0099993739277 | 3.10636494158655 |
| 28.0124993738718 | 2.07492790545816 |
| 28.0149993738160 | 3.12386139791141 |
| 28.0174993737601 | 2.09996481966961 |
| 28.0199993737042 | 3.11826340941412 |
| 28.0224993736483 | 2.14143674663414 |
| 28.0249993735924 | 3.10218182754074 |
| 28.0274993735366 | 2.17093896792747 |
| 28.0299993734807 | 3.11869396085894 |
| 28.0324993734248 | 2.18583150734955 |
| 28.0349993733689 | 3.13523646596457 |
| 28.0374993733130 | 2.19907832216363 |
| 28.0399993732572 | 3.12323002458961 |
| 28.0424993732013 | 2.20342246594951 |
| 28.0449993731454 | 3.08295818594106 |
| 28.0474993730895 | 2.18238441431064 |
| 28.0499993730336 | 3.06801514127766 |
| 28.0524993729778 | 2.14705683114584 |
| 28.0549993729219 | 3.06030175544112 |
| 28.0574993728660 | 2.11558669217619 |
| 28.0599993728101 | 3.04052752572790 |
| 28.0624993727542 | 2.08882843994451 |
| 28.0649993726984 | 3.00059331883079 |
| 28.0674993726425 | 2.05106948164634 |
| 28.0699993725866 | 2.99679905998050 |
| 28.0724993725307 | 2.02751817009417 |
| 28.0749993724748 | 3.01625486553922 |
| 28.0774993724190 | 2.04750494934322 |
| 28.0799993723631 | 3.02560712891462 |
| 28.0824993723072 | 2.09941398335464 |
| 28.0849993722513 | 3.01831113104630 |
| 28.0874993721955 | 2.13557582173474 |
| 28.0899993721396 | 3.03693318128453 |
| 28.0924993720837 | 2.15299828947076 |

|                  |                  |
|------------------|------------------|
| 28.0949993720278 | 3.08221401414973 |
| 28.0974993719719 | 2.17544740390891 |
| 28.0999993719161 | 3.11065917406793 |
| 28.1024993718602 | 2.20742757732366 |
| 28.1049993718043 | 3.11377730276621 |
| 28.1074993717484 | 2.21627980708461 |
| 28.1099993716925 | 3.11871279695887 |
| 28.1124993716367 | 2.18795536921277 |
| 28.1149993715808 | 3.14182802181326 |
| 28.1174993715249 | 2.15135794081692 |
| 28.1199993714690 | 3.14434605497868 |
| 28.1224993714131 | 2.13238661679678 |
| 28.1249993713573 | 3.12199877990063 |
| 28.1274993713014 | 2.11769305836068 |
| 28.1299993712455 | 3.10037702826753 |
| 28.1324993711896 | 2.08773627598938 |
| 28.1349993711337 | 3.10831935701498 |
| 28.1374993710779 | 2.06308457916611 |
| 28.1399993710220 | 3.11141547838954 |
| 28.1424993709661 | 2.07230017837306 |
| 28.1449993709102 | 3.08696120133393 |
| 28.1474993708543 | 2.10262065382917 |
| 28.1499993707985 | 3.06558223693657 |
| 28.1524993707426 | 2.12929080602298 |
| 28.1549993706867 | 3.06916521790747 |
| 28.1574993706308 | 2.15117571845863 |
| 28.1599993705750 | 3.07857084857991 |
| 28.1624993705191 | 2.17542540002019 |
| 28.1649993704632 | 3.05910627808924 |
| 28.1674993704073 | 2.18788662644046 |
| 28.1699993703514 | 3.03636380568749 |
| 28.1724993702956 | 2.17381150125902 |
| 28.1749993702397 | 3.03898285124530 |
| 28.1774993701838 | 2.14769350812680 |
| 28.1799993701279 | 3.04683745816182 |
| 28.1824993700720 | 2.12839268421619 |
| 28.1849993700162 | 3.03259558446704 |
| 28.1874993699603 | 2.11005687554127 |
| 28.1899993699044 | 3.00173103456339 |
| 28.1924993698485 | 2.07175324114529 |
| 28.1949993697926 | 3.01139969906188 |
| 28.1974993697368 | 2.04045238674883 |
| 28.1999993696809 | 3.04250675509751 |
| 28.2024993696250 | 2.05154778951747 |
| 28.2049993695691 | 3.06032332994767 |
| 28.2074993695132 | 2.09515038662073 |
| 28.2099993694574 | 3.05270204359580 |
| 28.2124993694015 | 2.12005529150209 |
| 28.2149993693456 | 3.08304784696459 |
| 28.2174993692897 | 2.13278246625599 |
| 28.2199993692338 | 3.12911551875766 |
| 28.2224993691780 | 2.16658917138114 |

|                  |                  |
|------------------|------------------|
| 28.2249993691221 | 3.15433708051517 |
| 28.2274993690662 | 2.21605879060868 |
| 28.2299993690103 | 3.13771972443174 |
| 28.2324993689544 | 2.23381493502595 |
| 28.2349993688986 | 3.14020989943555 |
| 28.2374993688427 | 2.20417519670329 |
| 28.2399993687868 | 3.16335470640410 |
| 28.2424993687309 | 2.17083282478177 |
| 28.2449993686751 | 3.16635644780101 |
| 28.2474993686192 | 2.15908150727896 |
| 28.2499993685633 | 3.12372458290244 |
| 28.2524993685074 | 2.14585602479989 |
| 28.2549993684515 | 3.08325002720733 |
| 28.2574993683957 | 2.09954683946608 |
| 28.2599993683398 | 3.08104484593571 |
| 28.2624993682839 | 2.05311289399414 |
| 28.2649993682280 | 3.07586680401054 |
| 28.2674993681721 | 2.04734811442192 |
| 28.2699993681163 | 3.04085668809581 |
| 28.2724993680604 | 2.07233754670155 |
| 28.2749993680045 | 3.00738510896958 |
| 28.2774993679486 | 2.09232751520932 |
| 28.2799993678927 | 3.02144542617635 |
| 28.2824993678369 | 2.11127508238837 |
| 28.2849993677810 | 3.03825124216629 |
| 28.2874993677251 | 2.14236937715325 |
| 28.2899993676692 | 3.03405582145105 |
| 28.2924993676133 | 2.17186391787216 |
| 28.2949993675575 | 3.01517531251252 |
| 28.2974993675016 | 2.17790504016796 |
| 28.2999993674457 | 3.03886000813348 |
| 28.3024993673898 | 2.16767272806390 |
| 28.3049993673339 | 3.06169833948235 |
| 28.3074993672781 | 2.15734152895757 |
| 28.3099993672222 | 3.07074963220042 |
| 28.3124993671663 | 2.14211426881971 |
| 28.3149993671104 | 3.04923077577444 |
| 28.3174993670546 | 2.10800909408356 |
| 28.3199993669987 | 3.06557310526531 |
| 28.3224993669428 | 2.07512632885543 |
| 28.3249993668869 | 3.08957767108726 |
| 28.3274993668310 | 2.07368047696891 |
| 28.3299993667752 | 3.10466713773538 |
| 28.3324993667193 | 2.09446244780994 |
| 28.3349993666634 | 3.09225487740678 |
| 28.3374993666075 | 2.10328373706307 |
| 28.3399993665516 | 3.10862457364443 |
| 28.3424993664958 | 2.10802769446395 |
| 28.3449993664399 | 3.13902752709784 |
| 28.3474993663840 | 2.14189112671536 |
| 28.3499993663281 | 3.14887388679525 |
| 28.3524993662722 | 2.19222529597553 |



|                  |                  |
|------------------|------------------|
| 28.3549993662164 | 3.13026727053362 |
| 28.3574993661605 | 2.21712384605123 |
| 28.3599993661046 | 3.11769910426439 |
| 28.3624993660487 | 2.20019368032771 |
| 28.3649993659928 | 3.13183461348440 |
| 28.3674993659370 | 2.17843336662497 |
| 28.3699993658811 | 3.12128682800556 |
| 28.3724993658252 | 2.16754345147081 |
| 28.3749993657693 | 3.08862633510158 |
| 28.3774993657134 | 2.15140029183088 |
| 28.3799993656576 | 3.04643530393754 |
| 28.3824993656017 | 2.10592788530852 |
| 28.3849993655458 | 3.04483254589493 |
| 28.3874993654899 | 2.06009350235978 |
| 28.3899993654341 | 3.02869198965279 |
| 28.3924993653782 | 2.04396651168017 |
| 28.3949993653223 | 3.00152137192558 |
| 28.3974993652664 | 2.05374411147908 |
| 28.3999993652105 | 2.98018771132592 |
| 28.4024993651547 | 2.06523357156231 |
| 28.4049993650988 | 3.01282250213600 |
| 28.4074993650429 | 2.08694817417851 |
| 28.4099993649870 | 3.04120682997277 |
| 28.4124993649311 | 2.12860385994341 |
| 28.4149993648753 | 3.04585163788537 |
| 28.4174993648194 | 2.16906363161181 |
| 28.4199993647635 | 3.04352590018370 |
| 28.4224993647076 | 2.18766184374574 |
| 28.4249993646517 | 3.07987318017350 |
| 28.4274993645959 | 2.19271998141874 |
| 28.4299993645400 | 3.11623493701245 |
| 28.4324993644841 | 2.20011935954575 |
| 28.4349993644282 | 3.12030879596043 |
| 28.4374993643723 | 2.19157931229376 |
| 28.4399993643165 | 3.10548877333682 |
| 28.4424993642606 | 2.15111596248041 |
| 28.4449993642047 | 3.12137301767075 |
| 28.4474993641488 | 2.10512786551269 |
| 28.4499993640929 | 3.14403963317895 |
| 28.4524993640371 | 2.09431967368618 |
| 28.4549993639812 | 3.13140710376278 |
| 28.4574993639253 | 2.10259800210406 |
| 28.4599993638694 | 3.09343939473865 |
| 28.4624993638135 | 2.09011963931972 |
| 28.4649993637577 | 3.08856895639016 |
| 28.4674993637018 | 2.07106593998429 |
| 28.4699993636459 | 3.11294487632579 |
| 28.4724993635900 | 2.09399232446874 |
| 28.4749993635342 | 3.11213522700171 |
| 28.4774993634783 | 2.14441590901952 |
| 28.4799993634224 | 3.08303654998201 |
| 28.4824993633665 | 2.17516222313417 |



|                  |                  |
|------------------|------------------|
| 28.4849993633106 | 3.06747168882697 |
| 28.4874993632548 | 2.17186325689303 |
| 28.4899993631989 | 3.08123870045944 |
| 28.4924993631430 | 2.17349664520997 |
| 28.4949993630871 | 3.07308024283422 |
| 28.4974993630312 | 2.17987459715118 |
| 28.4999993629754 | 3.04186226250877 |
| 28.5024993629195 | 2.16871943933626 |
| 28.5049993628636 | 3.01715405028149 |
| 28.5074993628077 | 2.12139824493682 |
| 28.5099993627518 | 3.03129882969149 |
| 28.5124993626960 | 2.07686231823730 |
| 28.5149993626401 | 3.03400724129805 |
| 28.5174993625842 | 2.06165982179335 |
| 28.5199993625283 | 3.01506985908867 |
| 28.5224993624724 | 2.06647271865103 |
| 28.5249993624166 | 3.00214942268719 |
| 28.5274993623607 | 2.06725904042575 |
| 28.5299993623048 | 3.03302983323689 |
| 28.5324993622489 | 2.07607418630332 |
| 28.5349993621930 | 3.06777551246730 |
| 28.5374993621372 | 2.11154122511070 |
| 28.5399993620813 | 3.07934714943314 |
| 28.5424993620254 | 2.15376871717090 |
| 28.5449993619695 | 3.08828870564476 |
| 28.5474993619137 | 2.18265635915024 |
| 28.5499993618578 | 3.12454011138631 |
| 28.5524993618019 | 2.19706489177220 |
| 28.5549993617460 | 3.15461919363162 |
| 28.5574993616901 | 2.21253908761314 |
| 28.5599993616343 | 3.15351440526740 |
| 28.5624993615784 | 2.21304727850220 |
| 28.5649993615225 | 3.13241631481290 |
| 28.5674993614666 | 2.18951897894149 |
| 28.5699993614107 | 3.13595384416416 |
| 28.5724993613549 | 2.14842068732616 |
| 28.5749993612990 | 3.14028695305142 |
| 28.5774993612431 | 2.11992872438037 |
| 28.5799993611872 | 3.12217797977550 |
| 28.5824993611313 | 2.09806207875029 |
| 28.5849993610755 | 3.07828150048123 |
| 28.5874993610196 | 2.07072025819375 |
| 28.5899993609637 | 3.06283342023787 |
| 28.5924993609078 | 2.04940715760314 |
| 28.5949993608519 | 3.06113492805593 |
| 28.5974993607961 | 2.06954889483312 |
| 28.5999993607402 | 3.04966321534346 |
| 28.6024993606843 | 2.11035067799667 |
| 28.6049993606284 | 3.02172064795275 |
| 28.6074993605725 | 2.13555165550262 |
| 28.6099993605167 | 3.02215700300398 |
| 28.6124993604608 | 2.13967771731960 |

|                  |                  |
|------------------|------------------|
| 28.6149993604049 | 3.04598637440124 |
| 28.6174993603490 | 2.15919692733826 |
| 28.6199993602931 | 3.05097438144308 |
| 28.6224993602373 | 2.18734061037805 |
| 28.6249993601814 | 3.03643804651849 |
| 28.6274993601255 | 2.19177809611283 |
| 28.6299993600696 | 3.02663490071829 |
| 28.6324993600138 | 2.15563297520751 |
| 28.6349993599579 | 3.05046032281654 |
| 28.6374993599020 | 2.11514378874109 |
| 28.6399993598461 | 3.05993183014687 |
| 28.6424993597902 | 2.09674853241632 |
| 28.6449993597344 | 3.05629188750878 |
| 28.6474993596785 | 2.08825298599116 |
| 28.6499993596226 | 3.05132010316338 |
| 28.6524993595667 | 2.07413137925976 |
| 28.6549993595108 | 3.08380215313921 |
| 28.6574993594550 | 2.06816727081298 |
| 28.6599993593991 | 3.10375578867894 |
| 28.6624993593432 | 2.09237788515818 |
| 28.6649993592873 | 3.10711133056091 |
| 28.6674993592314 | 2.12912913794772 |
| 28.6699993591756 | 3.10329855791318 |
| 28.6724993591197 | 2.16431459560319 |
| 28.6749993590638 | 3.13191289028000 |
| 28.6774993590079 | 2.18673500802658 |
| 28.6799993589520 | 3.15217481057840 |
| 28.6824993588962 | 2.20626592140068 |
| 28.6849993588403 | 3.14967997268056 |
| 28.6874993587844 | 2.20707405959972 |
| 28.6899993587285 | 3.12828784764286 |
| 28.6924993586726 | 2.19302025186750 |
| 28.6949993586168 | 3.12190273382244 |
| 28.6974993585609 | 2.16848178192347 |
| 28.6999993585050 | 3.10943544842677 |
| 28.7024993584491 | 2.14970746472398 |
| 28.7049993583933 | 3.07587378183192 |
| 28.7074993583374 | 2.11436609490291 |
| 28.7099993582815 | 3.03573693725527 |
| 28.7124993582256 | 2.06616322880212 |
| 28.7149993581697 | 3.02514728193273 |
| 28.7174993581139 | 2.03108355067658 |
| 28.7199993580580 | 3.02915224542759 |
| 28.7224993580021 | 2.04547224629937 |
| 28.7249993579462 | 3.01570901517056 |
| 28.7274993578903 | 2.08403599579326 |
| 28.7299993578345 | 3.00205684254729 |
| 28.7324993577786 | 2.11096761184155 |
| 28.7349993577227 | 3.01257304240910 |
| 28.7374993576668 | 2.12772813260764 |
| 28.7399993576109 | 3.04440600170871 |
| 28.7424993575551 | 2.15966335089939 |

|                  |                  |
|------------------|------------------|
| 28.7449993574992 | 3.05583775693949 |
| 28.7474993574433 | 2.19621785823288 |
| 28.7499993573874 | 3.06507964786839 |
| 28.7524993573315 | 2.20362060340590 |
| 28.7549993572757 | 3.08253166785793 |
| 28.7574993572198 | 2.17970294002141 |
| 28.7599993571639 | 3.11504996016019 |
| 28.7624993571080 | 2.15263463417460 |
| 28.7649993570521 | 3.11413778920089 |
| 28.7674993569963 | 2.13900514727197 |
| 28.7699993569404 | 3.10038890580150 |
| 28.7724993568845 | 2.11822407559021 |
| 28.7749993568286 | 3.09555839328981 |
| 28.7774993567728 | 2.08696417604256 |
| 28.7799993567169 | 3.11627434575231 |
| 28.7824993566610 | 2.06488511993985 |
| 28.7849993566051 | 3.11868926986242 |
| 28.7874993565492 | 2.07677163970091 |
| 28.7899993564934 | 3.10372530181877 |
| 28.7924993564375 | 2.09970002608254 |
| 28.7949993563816 | 3.09842678779070 |
| 28.7974993563257 | 2.12613250378051 |
| 28.7999993562698 | 3.11522383384694 |
| 28.8024993562140 | 2.15482759016563 |
| 28.8049993561581 | 3.11833237433247 |
| 28.8074993561022 | 2.19278964790447 |
| 28.8099993560463 | 3.09304509397859 |
| 28.8124993559904 | 2.20589372482017 |
| 28.8149993559346 | 3.07430123544603 |
| 28.8174993558787 | 2.19415814477991 |
| 28.8199993558228 | 3.07816810597829 |
| 28.8224993557669 | 2.16740198608588 |
| 28.8249993557110 | 3.07707990877618 |
| 28.8274993556552 | 2.14988700237338 |
| 28.8299993555993 | 3.04478277193661 |
| 28.8324993555434 | 2.12001457980741 |
| 28.8349993554875 | 3.01014441863925 |
| 28.8374993554316 | 2.07618480716867 |
| 28.8399993553758 | 3.00579822835948 |
| 28.8424993553199 | 2.04021342064844 |
| 28.8449993552640 | 3.01572623339769 |
| 28.8474993552081 | 2.04203453931759 |
| 28.8499993551522 | 3.01404591935093 |
| 28.8524993550964 | 2.06442547504651 |
| 28.8549993550405 | 3.01352579076088 |
| 28.8574993549846 | 2.08217696124297 |
| 28.8599993549287 | 3.04662639838445 |
| 28.8624993548729 | 2.11100055969202 |
| 28.8649993548170 | 3.08582654672504 |
| 28.8674993547611 | 2.16098523072371 |
| 28.8699993547052 | 3.10310373204780 |
| 28.8724993546493 | 2.21155645887506 |

|                  |                  |
|------------------|------------------|
| 28.8749993545935 | 3.10694780886500 |
| 28.8774993545376 | 2.22427445414319 |
| 28.8799993544817 | 3.12966987522726 |
| 28.8824993544258 | 2.21005644717279 |
| 28.8849993543699 | 3.15833204964408 |
| 28.8874993543141 | 2.19265513580773 |
| 28.8899993542582 | 3.15693181162755 |
| 28.8924993542023 | 2.18276400111968 |
| 28.8949993541464 | 3.13562552685505 |
| 28.8974993540905 | 2.15056404452855 |
| 28.8999993540347 | 3.12298848061981 |
| 28.9024993539788 | 2.10167261078551 |
| 28.9049993539229 | 3.12494660945527 |
| 28.9074993538670 | 2.06464133374153 |
| 28.9099993538111 | 3.10044753598880 |
| 28.9124993537553 | 2.06419755379058 |
| 28.9149993536994 | 3.06599358198969 |
| 28.9174993536435 | 2.07218622456815 |
| 28.9199993535876 | 3.05123741406335 |
| 28.9224993535317 | 2.08533412387680 |
| 28.9249993534759 | 3.06769042602411 |
| 28.9274993534200 | 2.10830972302672 |
| 28.9299993533641 | 3.06266046240422 |
| 28.9324993533082 | 2.14795904938665 |
| 28.9349993532524 | 3.04378041934516 |
| 28.9374993531965 | 2.17378839858092 |
| 28.9399993531406 | 3.03508606160122 |
| 28.9424993530847 | 2.18607863604537 |
| 28.9449993530288 | 3.05040866631915 |
| 28.9474993529730 | 2.18553483640115 |
| 28.9499993529171 | 3.05004108423657 |
| 28.9524993528612 | 2.17723684227761 |
| 28.9549993528053 | 3.03005669019228 |
| 28.9574993527494 | 2.14092840827385 |
| 28.9599993526936 | 3.02170474026070 |
| 28.9624993526377 | 2.09065601452989 |
| 28.9649993525818 | 3.04326038784163 |
| 28.9674993525259 | 2.06133941415430 |
| 28.9699993524700 | 3.05704917842370 |
| 28.9724993524142 | 2.06640935538218 |
| 28.9749993523583 | 3.04750022564298 |
| 28.9774993523024 | 2.07464899269370 |
| 28.9799993522465 | 3.04831431694863 |
| 28.9824993521906 | 2.06704670603593 |
| 28.9849993521348 | 3.08798599469071 |
| 28.9874993520789 | 2.08761188504281 |
| 28.9899993520230 | 3.12559433254765 |
| 28.9924993519671 | 2.14703904195080 |
| 28.9949993519112 | 3.12752380352220 |
| 28.9974993518554 | 2.20913137030485 |
| 28.9999993517995 | 3.12611943963806 |
| 29.0024993517436 | 2.22139500057419 |

|                  |                  |
|------------------|------------------|
| 29.0049993516877 | 3.15040350533959 |
| 29.0074993516319 | 2.20901910769124 |
| 29.0099993515760 | 3.17961676672064 |
| 29.0124993515201 | 2.20391746361269 |
| 29.0149993514642 | 3.16001536430664 |
| 29.0174993514083 | 2.20997037941915 |
| 29.0199993513525 | 3.12246207724706 |
| 29.0224993512966 | 2.18163252588835 |
| 29.0249993512407 | 3.10061547718433 |
| 29.0274993511848 | 2.12301076483069 |
| 29.0299993511289 | 3.10315824944475 |
| 29.0324993510731 | 2.07109375893295 |
| 29.0349993510172 | 3.07011826623748 |
| 29.0374993509613 | 2.05574355526437 |
| 29.0399993509054 | 3.02480457053228 |
| 29.0424993508495 | 2.05007180291106 |
| 29.0449993507937 | 3.00704228028091 |
| 29.0474993507378 | 2.05202415663900 |
| 29.0499993506819 | 3.02840738049457 |
| 29.0524993506260 | 2.07521567350890 |
| 29.0549993505701 | 3.03091178886635 |
| 29.0574993505143 | 2.12082358802141 |
| 29.0599993504584 | 3.01322539586188 |
| 29.0624993504025 | 2.15480295552865 |
| 29.0649993503466 | 3.01990997799173 |
| 29.0674993502907 | 2.17566329380031 |
| 29.0699993502349 | 3.05280138371480 |
| 29.0724993501790 | 2.19137820799104 |
| 29.0749993501231 | 3.07681196992504 |
| 29.0774993500672 | 2.20205563629146 |
| 29.0799993500113 | 3.06671862500523 |
| 29.0824993499555 | 2.18226011240205 |
| 29.0849993498996 | 3.07012224006814 |
| 29.0874993498437 | 2.13470897824926 |
| 29.0899993497878 | 3.09401786190836 |
| 29.0924993497320 | 2.09808364973778 |
| 29.0949993496761 | 3.11408246405855 |
| 29.0974993496202 | 2.09330018885157 |
| 29.0999993495643 | 3.09665101472042 |
| 29.1024993495084 | 2.09412669572354 |
| 29.1049993494526 | 3.08251905627751 |
| 29.1074993493967 | 2.07237121893376 |
| 29.1099993493408 | 3.10428824646440 |
| 29.1124993492849 | 2.07039782177701 |
| 29.1149993492290 | 3.13030225217470 |
| 29.1174993491732 | 2.11028073563353 |
| 29.1199993491173 | 3.12670366854888 |
| 29.1224993490614 | 2.16674777971087 |
| 29.1249993490055 | 3.11069773185342 |
| 29.1274993489496 | 2.18719633332012 |
| 29.1299993488938 | 3.12345141129392 |
| 29.1324993488379 | 2.19085200898052 |



|                  |                  |
|------------------|------------------|
| 29.1349993487820 | 3.13658302397386 |
| 29.1374993487261 | 2.19836529061346 |
| 29.1399993486702 | 3.11695888271966 |
| 29.1424993486144 | 2.20882682290237 |
| 29.1449993485585 | 3.07617868439172 |
| 29.1474993485026 | 2.18313285516984 |
| 29.1499993484467 | 3.06310032047303 |
| 29.1524993483908 | 2.13074173350432 |
| 29.1549993483350 | 3.06573872963418 |
| 29.1574993482791 | 2.08404862366620 |
| 29.1599993482232 | 3.04203673629379 |
| 29.1624993481673 | 2.06554807778396 |
| 29.1649993481115 | 2.99995946634050 |
| 29.1674993480556 | 2.05129728502258 |
| 29.1699993479997 | 2.99344073608832 |
| 29.1724993479438 | 2.04208762109416 |
| 29.1749993478879 | 3.02072705372961 |
| 29.1774993478321 | 2.05949638278828 |
| 29.1799993477762 | 3.03009107774007 |
| 29.1824993477203 | 2.10491865855287 |
| 29.1849993476644 | 3.02153855558174 |
| 29.1874993476085 | 2.14342501031153 |
| 29.1899993475527 | 3.04525506415637 |
| 29.1924993474968 | 2.16702682621074 |
| 29.1949993474409 | 3.09791439104537 |
| 29.1974993473850 | 2.19133993818873 |
| 29.1999993473291 | 3.12292058000103 |
| 29.2024993472733 | 2.21471541770404 |
| 29.2049993472174 | 3.11318904464602 |
| 29.2074993471615 | 2.21112130454256 |
| 29.2099993471056 | 3.11267918324536 |
| 29.2124993470497 | 2.17761220833485 |
| 29.2149993469939 | 3.14114453208142 |
| 29.2174993469380 | 2.14782270371323 |
| 29.2199993468821 | 3.14803741111982 |
| 29.2224993468262 | 2.13086995725596 |
| 29.2249993467703 | 3.12237066499031 |
| 29.2274993467145 | 2.10607619370122 |
| 29.2299993466586 | 3.09514343878745 |
| 29.2324993466027 | 2.06289098028131 |
| 29.2349993465468 | 3.10874478779089 |
| 29.2374993464909 | 2.05524774636174 |
| 29.2399993464351 | 3.10754370640656 |
| 29.2424993463792 | 2.09099629600198 |
| 29.2449993463233 | 3.08276062177442 |
| 29.2474993462674 | 2.13233800190261 |
| 29.2499993462116 | 3.05485195840011 |
| 29.2524993461557 | 2.13750952268522 |
| 29.2549993460998 | 3.07081246390691 |
| 29.2574993460439 | 2.14608474941508 |
| 29.2599993459880 | 3.08509697033853 |
| 29.2624993459322 | 2.17215075400028 |



|                  |                  |
|------------------|------------------|
| 29.2649993458763 | 3.06719999983258 |
| 29.2674993458204 | 2.19737892974425 |
| 29.2699993457645 | 3.03866366639696 |
| 29.2724993457086 | 2.18139146526065 |
| 29.2749993456528 | 3.03344917914130 |
| 29.2774993455969 | 2.14133989958180 |
| 29.2799993455410 | 3.04678828631085 |
| 29.2824993454851 | 2.10928668698828 |
| 29.2849993454292 | 3.02855150004586 |
| 29.2874993453734 | 2.09530114694428 |
| 29.2899993453175 | 3.00932217885041 |
| 29.2924993452616 | 2.07604024727220 |
| 29.2949993452057 | 3.01469351222939 |
| 29.2974993451498 | 2.05256390904547 |
| 29.2999993450940 | 3.05593028002325 |
| 29.3024993450381 | 2.05755427216635 |
| 29.3049993449822 | 3.06209865474726 |
| 29.3074993449263 | 2.09310327518209 |
| 29.3099993448704 | 3.05973609787315 |
| 29.3124993448146 | 2.13168663912007 |
| 29.3149993447587 | 3.07636253438976 |
| 29.3174993447028 | 2.15937622527734 |
| 29.3199993446469 | 3.12751045683080 |
| 29.3224993445911 | 2.19011852318910 |
| 29.3249993445352 | 3.14783271335533 |
| 29.3274993444793 | 2.21389934670301 |
| 29.3299993444234 | 3.13957375494971 |
| 29.3324993443675 | 2.21221956564239 |
| 29.3349993443117 | 3.14143076922634 |
| 29.3374993442558 | 2.18655847310288 |
| 29.3399993441999 | 3.15921341551121 |
| 29.3424993441440 | 2.16998915914665 |
| 29.3449993440881 | 3.15459120670080 |
| 29.3474993440323 | 2.16061631375355 |
| 29.3499993439764 | 3.10599260994710 |
| 29.3524993439205 | 2.13145061389562 |
| 29.3549993438646 | 3.07341545013540 |
| 29.3574993438087 | 2.07323356377351 |
| 29.3599993437529 | 3.07516215281178 |
| 29.3624993436970 | 2.04373367568502 |
| 29.3649993436411 | 3.07757180761863 |
| 29.3674993435852 | 2.06431231869090 |
| 29.3699993435293 | 3.03812567818384 |
| 29.3724993434735 | 2.09940911961152 |
| 29.3749993434176 | 3.01035729501898 |
| 29.3774993433617 | 2.10436049982269 |
| 29.3799993433058 | 3.02089538918017 |
| 29.3824993432499 | 2.11438755631034 |
| 29.3849993431941 | 3.04488317406136 |
| 29.3874993431382 | 2.14831653301300 |
| 29.3899993430823 | 3.03315022166888 |
| 29.3924993430264 | 2.18491335070181 |

|                  |                  |
|------------------|------------------|
| 29.3949993429706 | 3.02240913076192 |
| 29.3974993429147 | 2.18182317860820 |
| 29.3999993428588 | 3.04100179598155 |
| 29.4024993428029 | 2.15319550511513 |
| 29.4049993427470 | 3.07469348373216 |
| 29.4074993426912 | 2.13582245829236 |
| 29.4099993426353 | 3.07081013418446 |
| 29.4124993425794 | 2.13197865159058 |
| 29.4149993425235 | 3.05053618915364 |
| 29.4174993424676 | 2.11399793821990 |
| 29.4199993424118 | 3.06124788984231 |
| 29.4224993423559 | 2.07961870998532 |
| 29.4249993423000 | 3.09648680890473 |
| 29.4274993422441 | 2.06941311935196 |
| 29.4299993421882 | 3.10763728237032 |
| 29.4324993421324 | 2.08880263888023 |
| 29.4349993420765 | 3.09228940928449 |
| 29.4374993420206 | 2.11363855582737 |
| 29.4399993419647 | 3.10418069553868 |
| 29.4424993419088 | 2.13089546189507 |
| 29.4449993418530 | 3.13379574370555 |
| 29.4474993417971 | 2.15998996321025 |
| 29.4499993417412 | 3.14500283945881 |
| 29.4524993416853 | 2.18980809926486 |
| 29.4549993416294 | 3.12020252398975 |
| 29.4574993415736 | 2.20051446523057 |
| 29.4599993415177 | 3.11467265051979 |
| 29.4624993414618 | 2.18634433150636 |
| 29.4649993414059 | 3.12160980144044 |
| 29.4674993413500 | 2.17223791947590 |
| 29.4699993412942 | 3.11574720511549 |
| 29.4724993412383 | 2.15756457534554 |
| 29.4749993411824 | 3.07428324622082 |
| 29.4774993411265 | 2.13052193177024 |
| 29.4799993410707 | 3.04238356194826 |
| 29.4824993410148 | 2.08799925268976 |
| 29.4849993409589 | 3.03419595747902 |
| 29.4874993409030 | 2.06272757149969 |
| 29.4899993408471 | 3.02580933712453 |
| 29.4924993407913 | 2.06074005795709 |
| 29.4949993407354 | 3.00653866901093 |
| 29.4974993406795 | 2.06810666458140 |
| 29.4999993406236 | 2.99704207978517 |
| 29.5024993405677 | 2.07137855303491 |
| 29.5049993405119 | 3.02164886986725 |
| 29.5074993404560 | 2.09698932861662 |
| 29.5099993404001 | 3.04048569881294 |
| 29.5124993403442 | 2.14363257289630 |
| 29.5149993402883 | 3.04744454959249 |
| 29.5174993402325 | 2.18219579589985 |
| 29.5199993401766 | 3.05280060339830 |
| 29.5224993401207 | 2.18560955745028 |

|                  |                  |
|------------------|------------------|
| 29.5249993400648 | 3.08603525403648 |
| 29.5274993400089 | 2.17380901324058 |
| 29.5299993399531 | 3.11426569362362 |
| 29.5324993398972 | 2.17246125188667 |
| 29.5349993398413 | 3.11763092060526 |
| 29.5374993397854 | 2.17098623342802 |
| 29.5399993397295 | 3.10901813513479 |
| 29.5424993396737 | 2.14666389134350 |
| 29.5449993396178 | 3.11692676288327 |
| 29.5474993395619 | 2.10504983438421 |
| 29.5499993395060 | 3.13009028948655 |
| 29.5524993394502 | 2.08443875257226 |
| 29.5549993393943 | 3.11441065959549 |
| 29.5574993393384 | 2.08705993542303 |
| 29.5599993392825 | 3.09110883802771 |
| 29.5624993392266 | 2.09587125149256 |
| 29.5649993391708 | 3.08781687294956 |
| 29.5674993391149 | 2.09724634062739 |
| 29.5699993390590 | 3.11072042934334 |
| 29.5724993390031 | 2.11601810007901 |
| 29.5749993389472 | 3.10237965990206 |
| 29.5774993388914 | 2.14431587749986 |
| 29.5799993388355 | 3.07826925694943 |
| 29.5824993387796 | 2.16814534511342 |
| 29.5849993387237 | 3.06352509668552 |
| 29.5874993386678 | 2.17399683833096 |
| 29.5899993386120 | 3.07462014716908 |
| 29.5924993385561 | 2.17900469450091 |
| 29.5949993385002 | 3.06682757457360 |
| 29.5974993384443 | 2.17187218815288 |
| 29.5999993383884 | 3.03596185786334 |
| 29.6024993383326 | 2.14289506841702 |
| 29.6049993382767 | 3.02103105760765 |
| 29.6074993382208 | 2.09769862707492 |
| 29.6099993381649 | 3.03127056011221 |
| 29.6124993381090 | 2.07579991393872 |
| 29.6149993380532 | 3.03576329882700 |
| 29.6174993379973 | 2.07863587276488 |
| 29.6199993379414 | 3.01210699714934 |
| 29.6224993378855 | 2.07584675937941 |
| 29.6249993378296 | 3.00985908069614 |
| 29.6274993377738 | 2.05910303995380 |
| 29.6299993377179 | 3.04024687420298 |
| 29.6324993376620 | 2.07266294930001 |
| 29.6349993376061 | 3.07669531680568 |
| 29.6374993375503 | 2.12599318049823 |
| 29.6399993374944 | 3.07956388980485 |
| 29.6424993374385 | 2.17330383674810 |
| 29.6449993373826 | 3.09540668096665 |
| 29.6474993373267 | 2.18392152061378 |
| 29.6499993372709 | 3.12484247606483 |
| 29.6524993372150 | 2.18144159544967 |

|                  |                  |
|------------------|------------------|
| 29.6549993371591 | 3.15589835081376 |
| 29.6574993371032 | 2.19442054888870 |
| 29.6599993370473 | 3.14478766253574 |
| 29.6624993369915 | 2.20325092379465 |
| 29.6649993369356 | 3.13337272176899 |
| 29.6674993368797 | 2.18492225719567 |
| 29.6699993368238 | 3.13175520253755 |
| 29.6724993367679 | 2.14102036137749 |
| 29.6749993367121 | 3.13385505364655 |
| 29.6774993366562 | 2.10598445975344 |
| 29.6799993366003 | 3.10533900354873 |
| 29.6824993365444 | 2.08499441206781 |
| 29.6849993364885 | 3.07242320735881 |
| 29.6874993364327 | 2.07635988779811 |
| 29.6899993363768 | 3.06003626236782 |
| 29.6924993363209 | 2.07172474431668 |
| 29.6949993362650 | 3.05707800343711 |
| 29.6974993362091 | 2.08566970105192 |
| 29.6999993361533 | 3.04348870636002 |
| 29.7024993360974 | 2.10598885354814 |
| 29.7049993360415 | 3.02040270383586 |
| 29.7074993359856 | 2.12687325711148 |
| 29.7099993359298 | 3.03006995582445 |
| 29.7124993358739 | 2.14427568062201 |
| 29.7149993358180 | 3.03893529385968 |
| 29.7174993357621 | 2.16829054415892 |
| 29.7199993357062 | 3.04620077708512 |
| 29.7224993356504 | 2.18046058757227 |
| 29.7249993355945 | 3.02481808947695 |
| 29.7274993355386 | 2.16588269200804 |
| 29.7299993354827 | 3.03889179181046 |
| 29.7324993354268 | 2.13312520062513 |
| 29.7349993353710 | 3.05218504431203 |
| 29.7374993353151 | 2.11124480301669 |
| 29.7399993352592 | 3.06722782964324 |
| 29.7424993352033 | 2.10224302531391 |
| 29.7449993351474 | 3.05148145620992 |
| 29.7474993350916 | 2.08499609676397 |
| 29.7499993350357 | 3.06115502996843 |
| 29.7524993349798 | 2.06398314808285 |
| 29.7549993349239 | 3.08542821473211 |
| 29.7574993348680 | 2.07228716761698 |
| 29.7599993348122 | 3.10476215173820 |
| 29.7624993347563 | 2.11207762335881 |
| 29.7649993347004 | 3.10506746260673 |
| 29.7674993346445 | 2.14747759713716 |
| 29.7699993345886 | 3.11310525294697 |
| 29.7724993345328 | 2.16113098840908 |
| 29.7749993344769 | 3.14301405161367 |
| 29.7774993344210 | 2.17511452362100 |
| 29.7799993343651 | 3.15379030405669 |
| 29.7824993343093 | 2.20103731138139 |

|                  |                  |
|------------------|------------------|
| 29.7849993342534 | 3.14183583578741 |
| 29.7874993341975 | 2.21493895357637 |
| 29.7899993341416 | 3.11419509983270 |
| 29.7924993340857 | 2.19597762734346 |
| 29.7949993340299 | 3.11314180477360 |
| 29.7974993339740 | 2.15602167497222 |
| 29.7999993339181 | 3.09858280770952 |
| 29.8024993338622 | 2.12534873431115 |
| 29.8049993338063 | 3.07155831764106 |
| 29.8074993337505 | 2.09960234053284 |
| 29.8099993336946 | 3.03057156102426 |
| 29.8124993336387 | 2.07094349505219 |
| 29.8149993335828 | 3.02374780652851 |
| 29.8174993335269 | 2.04446239064503 |
| 29.8199993334711 | 3.02027515865989 |
| 29.8224993334152 | 2.05042149059992 |
| 29.8249993333593 | 3.00975688963976 |
| 29.8274993333034 | 2.07689739000125 |
| 29.8299993332475 | 2.99491620150314 |
| 29.8324993331917 | 2.10912654407956 |
| 29.8349993331358 | 3.01414274322932 |
| 29.8374993330799 | 2.13430904816664 |
| 29.8399993330240 | 3.04724686334550 |
| 29.8424993329681 | 2.16492710951016 |
| 29.8449993329123 | 3.06755857457409 |
| 29.8474993328564 | 2.18578927980558 |
| 29.8499993328005 | 3.07033521447512 |
| 29.8524993327446 | 2.18883256847046 |
| 29.8549993326887 | 3.08770483299635 |
| 29.8574993326329 | 2.17715777256588 |
| 29.8599993325770 | 3.10907564639171 |
| 29.8624993325211 | 2.16715139076277 |
| 29.8649993324652 | 3.11369944914277 |
| 29.8674993324094 | 2.14749400230594 |
| 29.8699993323535 | 3.10193600805207 |
| 29.8724993322976 | 2.10726039869898 |
| 29.8749993322417 | 3.10526538339898 |
| 29.8774993321858 | 2.06848012551535 |
| 29.8799993321300 | 3.12197250158710 |
| 29.8824993320741 | 2.06966060206474 |
| 29.8849993320182 | 3.11945490004231 |
| 29.8874993319623 | 2.10165407610411 |
| 29.8899993319064 | 3.09908126716984 |
| 29.8924993318506 | 2.12093851892293 |
| 29.8949993317947 | 3.09498749552466 |
| 29.8974993317388 | 2.12345094834234 |
| 29.8999993316829 | 3.11031499332785 |
| 29.9024993316270 | 2.14156036217474 |
| 29.9049993315712 | 3.11268874599084 |
| 29.9074993315153 | 2.18215486540140 |
| 29.9099993314594 | 3.08903615481399 |
| 29.9124993314035 | 2.20509029035298 |

|                  |                  |
|------------------|------------------|
| 29.9149993313476 | 3.07373679725526 |
| 29.9174993312918 | 2.19168102166647 |
| 29.9199993312359 | 3.07421377008187 |
| 29.9224993311800 | 2.15883569373609 |
| 29.9249993311241 | 3.06386390796866 |
| 29.9274993310682 | 2.13611045572484 |
| 29.9299993310124 | 3.02974583564331 |
| 29.9324993309565 | 2.11290288125744 |
| 29.9349993309006 | 3.00378550865987 |
| 29.9374993308447 | 2.08330588599490 |
| 29.9399993307889 | 3.00982233349595 |
| 29.9424993307330 | 2.04848674070715 |
| 29.9449993306771 | 3.02212287778211 |
| 29.9474993306212 | 2.03991420222273 |
| 29.9499993305653 | 3.01831409094995 |
| 29.9524993305095 | 2.05685506735015 |
| 29.9549993304536 | 3.01723011885968 |
| 29.9574993303977 | 2.09277386424453 |
| 29.9599993303418 | 3.04869546394027 |
| 29.9624993302859 | 2.13332491246153 |
| 29.9649993302301 | 3.08360414545399 |
| 29.9674993301742 | 2.17787703687169 |
| 29.9699993301183 | 3.10503964613707 |
| 29.9724993300624 | 2.20545678931463 |
| 29.9749993300065 | 3.10728397618145 |
| 29.9774993299507 | 2.20884416021366 |
| 29.9799993298948 | 3.13971257177644 |
| 29.9824993298389 | 2.19983168297600 |
| 29.9849993297830 | 3.15689052330137 |
| 29.9874993297271 | 2.19630060273565 |
| 29.9899993296713 | 3.16057349738208 |
| 29.9924993296154 | 2.18559731730550 |
| 29.9949993295595 | 3.12493425532858 |
| 29.9974993295036 | 2.14417935280354 |
| 29.9999993294477 | 3.11464542193602 |
| 30.0024993293919 | 2.11667407444108 |
| 30.0049993293360 | 3.05166077105090 |
| 30.0074993292801 | 2.12278230134557 |
| 30.0099993292242 | 3.07095368177542 |
| 30.0124993291683 | 2.14456717919258 |
| 30.0149993291125 | 3.06809903901846 |
| 30.0174993290566 | 2.16458988057576 |
| 30.0199993290007 | 3.05025545605757 |
| 30.0224993289448 | 2.16986693013489 |
| 30.0249993288890 | 3.04159820829330 |
| 30.0274993288331 | 2.16798841771583 |
| 30.0299993287772 | 3.05180822530611 |
| 30.0324993287213 | 2.16087462348490 |
| 30.0349993286654 | 3.07515890346206 |
| 30.0374993286096 | 2.15229497965033 |
| 30.0399993285537 | 3.10812206002177 |
| 30.0424993284978 | 2.13273542842566 |



|                  |                  |
|------------------|------------------|
| 30.0449993284419 | 3.13000117079946 |
| 30.0474993283860 | 2.11975967769415 |
| 30.0499993283302 | 3.13451608404647 |
| 30.0524993282743 | 2.13057380261070 |
| 30.0549993282184 | 3.11604982646603 |
| 30.0574993281625 | 2.16573557120647 |
| 30.0599993281066 | 3.10523800479142 |
| 30.0624993280508 | 2.18707646926691 |
| 30.0649993279949 | 3.10478885877848 |
| 30.0674993279390 | 2.17818270226926 |
| 30.0699993278831 | 3.12284298931775 |
| 30.0724993278272 | 2.14791540703632 |
| 30.0749993277714 | 3.14491451104621 |
| 30.0774993277155 | 2.14100697309607 |
| 30.0799993276596 | 3.15187038868749 |
| 30.0824993276037 | 2.16586778873942 |
| 30.0849993275478 | 3.12110084353165 |
| 30.0874993274920 | 2.19844650360863 |
| 30.0899993274361 | 3.08562005773491 |
| 30.0924993273802 | 2.20077045476601 |
| 30.0949993273243 | 3.05770057195109 |
| 30.0974993272685 | 2.17510256257906 |
| 30.0999993272126 | 3.04155756799522 |
| 30.1024993271567 | 2.13608540889942 |
| 30.1049993271008 | 3.04519239361933 |
| 30.1074993270449 | 2.11239664535191 |
| 30.1099993269891 | 3.05955841850650 |
| 30.1124993269332 | 2.11165911239362 |
| 30.1149993268773 | 3.05852731951882 |
| 30.1174993268214 | 2.11881892111478 |
| 30.1199993267655 | 3.03809673095443 |
| 30.1224993267097 | 2.11932973284433 |
| 30.1249993266538 | 3.01454467765432 |
| 30.1274993265979 | 2.12205994517733 |
| 30.1299993265420 | 3.00916180892055 |
| 30.1324993264861 | 2.13560604693984 |
| 30.1349993264303 | 3.02710314664598 |
| 30.1374993263744 | 2.14767227656572 |
| 30.1399993263185 | 3.05737281969275 |
| 30.1424993262626 | 2.15464196128011 |
| 30.1449993262067 | 3.09083666506741 |
| 30.1474993261509 | 2.15274917385119 |
| 30.1499993260950 | 3.11374369829985 |
| 30.1524993260391 | 2.16008148553637 |
| 30.1549993259832 | 3.11800936551656 |
| 30.1574993259273 | 2.18237612462059 |
| 30.1599993258715 | 3.10757846721752 |
| 30.1624993258156 | 2.21098162791869 |
| 30.1649993257597 | 3.10341338785554 |
| 30.1674993257038 | 2.20765145151720 |
| 30.1699993256480 | 3.11043789112225 |
| 30.1724993255921 | 2.17871549571806 |

|                  |                  |
|------------------|------------------|
| 30.1749993255362 | 3.13297726059191 |
| 30.1774993254803 | 2.14420355833932 |
| 30.1799993254244 | 3.15474662696658 |
| 30.1824993253686 | 2.13605381574739 |
| 30.1849993253127 | 3.14991405015867 |
| 30.1874993252568 | 2.14813205646417 |
| 30.1899993252009 | 3.12000144926457 |
| 30.1924993251450 | 2.16086625176733 |
| 30.1949993250892 | 3.09075250977897 |
| 30.1974993250333 | 2.15665014109127 |
| 30.1999993249774 | 3.07109182070774 |
| 30.2024993249215 | 2.14736984917480 |
| 30.2049993248656 | 3.06087474046505 |
| 30.2074993248098 | 2.13276699881304 |
| 30.2099993247539 | 3.06990761781556 |
| 30.2124993246980 | 2.12067337988998 |
| 30.2149993246421 | 3.08517028225850 |
| 30.2174993245862 | 2.12277330718591 |
| 30.2199993245304 | 3.08010072294479 |
| 30.2224993244745 | 2.14141671882028 |
| 30.2249993244186 | 3.05355042242616 |
| 30.2274993243627 | 2.16255002098865 |
| 30.2299993243068 | 3.02886096011388 |
| 30.2324993242510 | 2.17206597760588 |
| 30.2349993241951 | 3.02774914340026 |
| 30.2374993241392 | 2.16478300543703 |
| 30.2399993240833 | 3.04633719916197 |
| 30.2424993240274 | 2.14335766329467 |
| 30.2449993239716 | 3.07299842137773 |
| 30.2474993239157 | 2.13550950813266 |
| 30.2499993238598 | 3.08985228817560 |
| 30.2524993238039 | 2.14335627738251 |
| 30.2549993237481 | 3.09428993217588 |
| 30.2574993236922 | 2.16187136147205 |
| 30.2599993236363 | 3.08584600936486 |
| 30.2624993235804 | 2.17247189052356 |
| 30.2649993235245 | 3.08047468518441 |
| 30.2674993234687 | 2.17332489293456 |
| 30.2699993234128 | 3.07773336513123 |
| 30.2724993233569 | 2.15837918802652 |
| 30.2749993233010 | 3.09290349932891 |
| 30.2774993232451 | 2.15433716953893 |
| 30.2799993231893 | 3.11910229246990 |
| 30.2824993231334 | 2.15987676036504 |
| 30.2849993230775 | 3.13683826682218 |
| 30.2874993230216 | 2.16970827382139 |
| 30.2899993229657 | 3.13035244329229 |
| 30.2924993229099 | 2.16972192817352 |
| 30.2949993228540 | 3.10896879712148 |
| 30.2974993227981 | 2.17071831958962 |
| 30.2999993227422 | 3.09509256818128 |
| 30.3024993226863 | 2.17690780188505 |

|                  |                  |
|------------------|------------------|
| 30.3049993226305 | 3.08872952189666 |
| 30.3074993225746 | 2.18635567144255 |
| 30.3099993225187 | 3.09121201525793 |
| 30.3124993224628 | 2.17514978339998 |
| 30.3149993224069 | 3.09940635096675 |
| 30.3174993223511 | 2.14143026692115 |
| 30.3199993222952 | 3.11470376043132 |
| 30.3224993222393 | 2.12224088276072 |
| 30.3249993221834 | 3.10442278991248 |
| 30.3274993221276 | 2.14133313643651 |
| 30.3299993220717 | 3.07475521731357 |
| 30.3324993220158 | 2.17763381689989 |
| 30.3349993219599 | 3.04461700842011 |
| 30.3374993219040 | 2.18474884511538 |
| 30.3399993218482 | 3.04356655273546 |
| 30.3424993217923 | 2.15586217010109 |
| 30.3449993217364 | 3.05828008365911 |
| 30.3474993216805 | 2.12171546883860 |
| 30.3499993216246 | 3.08401236510637 |
| 30.3524993215688 | 2.12491878174461 |
| 30.3549993215129 | 3.08822990299573 |
| 30.3574993214570 | 2.15476461521485 |
| 30.3599993214011 | 3.07643842220286 |
| 30.3624993213452 | 2.18162447827049 |
| 30.3649993212894 | 3.06519823881327 |
| 30.3674993212335 | 2.18057951725247 |
| 30.3699993211776 | 3.05494956290853 |
| 30.3724993211217 | 2.16689252312361 |
| 30.3749993210658 | 3.05479991190602 |
| 30.3774993210100 | 2.14967296079892 |
| 30.3799993209541 | 3.07547991155088 |
| 30.3824993208982 | 2.15002472679502 |
| 30.3849993208423 | 3.10768169721514 |
| 30.3874993207864 | 2.15762378761475 |
| 30.3899993207306 | 3.11862227651266 |
| 30.3924993206747 | 2.16138779960492 |
| 30.3949993206188 | 3.10823530368616 |
| 30.3974993205629 | 2.15586894005202 |
| 30.3999993205070 | 3.08822824125242 |
| 30.4024993204512 | 2.15965695204424 |
| 30.4049993203953 | 3.08827791087687 |
| 30.4074993203394 | 2.17125894808150 |
| 30.4099993202835 | 3.09279646763249 |
| 30.4124993202277 | 2.18045921828958 |
| 30.4149993201718 | 3.10163594462809 |
| 30.4174993201159 | 2.17017621081722 |
| 30.4199993200600 | 3.11135821070300 |
| 30.4224993200041 | 2.14909020307036 |
| 30.4249993199483 | 3.12715998714041 |
| 30.4274993198924 | 2.14741067592810 |
| 30.4299993198365 | 3.11076966825029 |
| 30.4324993197806 | 2.17364403721401 |

|                  |                  |
|------------------|------------------|
| 30.4349993197247 | 3.07979857504318 |
| 30.4374993196689 | 2.20024146561508 |
| 30.4399993196130 | 3.04982541081125 |
| 30.4424993195571 | 2.19150496247875 |
| 30.4449993195012 | 3.04670406045500 |
| 30.4474993194453 | 2.16229293230612 |
| 30.4499993193895 | 3.06190028981824 |
| 30.4524993193336 | 2.13424736695023 |
| 30.4549993192777 | 3.08040567911322 |
| 30.4574993192218 | 2.13061368903516 |
| 30.4599993191659 | 3.07530070020901 |
| 30.4624993191101 | 2.13866694021065 |
| 30.4649993190542 | 3.05792390472719 |
| 30.4674993189983 | 2.14818707513219 |
| 30.4699993189424 | 3.04370836912425 |
| 30.4724993188865 | 2.15050702713151 |
| 30.4749993188307 | 3.03294948348139 |
| 30.4774993187748 | 2.15209935806133 |
| 30.4799993187189 | 3.04014485992461 |
| 30.4824993186630 | 2.13992147596378 |
| 30.4849993186072 | 3.07233071857149 |
| 30.4874993185513 | 2.12729130270821 |
| 30.4899993184954 | 3.11572503839572 |
| 30.4924993184395 | 2.13329239185771 |
| 30.4949993183836 | 3.12644152354622 |
| 30.4974993183278 | 2.16282362604675 |
| 30.4999993182719 | 3.11151812037243 |
| 30.5024993182160 | 2.19197385563104 |
| 30.5049993181601 | 3.09269745995466 |
| 30.5074993181042 | 2.20603847179010 |
| 30.5099993180484 | 3.10123015219155 |
| 30.5124993179925 | 2.19767075571092 |
| 30.5149993179366 | 3.11433118948162 |
| 30.5174993178807 | 2.18184086212904 |
| 30.5199993178248 | 3.12573889903268 |
| 30.5224993177690 | 2.16956020832495 |
| 30.5249993177131 | 3.13430078100842 |
| 30.5274993176572 | 2.16350935145957 |
| 30.5299993176013 | 3.13399033500839 |
| 30.5324993175454 | 2.16456416401963 |
| 30.5349993174896 | 3.10760202534060 |
| 30.5374993174337 | 2.16613668857392 |
| 30.5399993173778 | 3.06931292447903 |
| 30.5424993173219 | 2.15646286014135 |
| 30.5449993172660 | 3.03837165742738 |
| 30.5474993172102 | 2.13293074784180 |
| 30.5499993171543 | 3.03679136755425 |
| 30.5524993170984 | 2.11776062326246 |
| 30.5549993170425 | 3.05488630572154 |
| 30.5574993169867 | 2.11142825222431 |
| 30.5599993169308 | 3.06704554457348 |
| 30.5624993168749 | 2.11431538200076 |

|                  |                  |
|------------------|------------------|
| 30.5649993168190 | 3.05222919348286 |
| 30.5674993167631 | 2.11942177309779 |
| 30.5699993167073 | 3.03453793987866 |
| 30.5724993166514 | 2.13986385132372 |
| 30.5749993165955 | 3.02607084783833 |
| 30.5774993165396 | 2.16774411798279 |
| 30.5799993164837 | 3.02651999237705 |
| 30.5824993164279 | 2.18887070649982 |
| 30.5849993163720 | 3.03644641666949 |
| 30.5874993163161 | 2.17092717828144 |
| 30.5899993162602 | 3.07411404417988 |
| 30.5924993162043 | 2.13628359006406 |
| 30.5949993161485 | 3.12052332611214 |
| 30.5974993160926 | 2.13081473906720 |
| 30.5999993160367 | 3.12850516760497 |
| 30.6024993159808 | 2.16614226610742 |
| 30.6049993159249 | 3.10346992193158 |
| 30.6074993158691 | 2.19777009558530 |
| 30.6099993158132 | 3.08450881403863 |
| 30.6124993157573 | 2.18938828472453 |
| 30.6149993157014 | 3.09862661204363 |
| 30.6174993156455 | 2.15208337320862 |
| 30.6199993155897 | 3.11768455601685 |
| 30.6224993155338 | 2.12834994387601 |
| 30.6249993154779 | 3.13622357191368 |
| 30.6274993154220 | 2.13584237620219 |
| 30.6299993153661 | 3.13806587900095 |
| 30.6324993153103 | 2.15644380736457 |
| 30.6349993152544 | 3.13453360156691 |
| 30.6374993151985 | 2.17205699957137 |
| 30.6399993151426 | 3.10926119649717 |
| 30.6424993150868 | 2.17866127024395 |
| 30.6449993150309 | 3.07506623779619 |
| 30.6474993149750 | 2.17886846663607 |
| 30.6499993149191 | 3.05209096157470 |
| 30.6524993148632 | 2.17078339118830 |
| 30.6549993148074 | 3.06074208646629 |
| 30.6574993147515 | 2.15995167528859 |
| 30.6599993146956 | 3.07910069111372 |
| 30.6624993146397 | 2.14576166520469 |
| 30.6649993145838 | 3.08471810878239 |
| 30.6674993145280 | 2.13492137166805 |
| 30.6699993144721 | 3.05860595418027 |
| 30.6724993144162 | 2.12770257510043 |
| 30.6749993143603 | 3.03111130489891 |
| 30.6774993143044 | 2.13335985794005 |
| 30.6799993142486 | 3.01996638823630 |
| 30.6824993141927 | 2.14149002475706 |
| 30.6849993141368 | 3.02276538212760 |
| 30.6874993140809 | 2.14241128834498 |
| 30.6899993140250 | 3.02788269694254 |
| 30.6924993139692 | 2.12229663306240 |

|                  |                  |
|------------------|------------------|
| 30.6949993139133 | 3.05859805881289 |
| 30.6974993138574 | 2.10837595660855 |
| 30.6999993138015 | 3.09476463380125 |
| 30.7024993137456 | 2.12818557561952 |
| 30.7049993136898 | 3.09424851251350 |
| 30.7074993136339 | 2.17532240813862 |
| 30.7099993135780 | 3.07633088661152 |
| 30.7124993135221 | 2.20444789999514 |
| 30.7149993134663 | 3.06127578322078 |
| 30.7174993134104 | 2.19822826622191 |
| 30.7199993133545 | 3.08285232560060 |
| 30.7224993132986 | 2.17699519640306 |
| 30.7249993132427 | 3.11038119974064 |
| 30.7274993131869 | 2.16343169488246 |
| 30.7299993131310 | 3.13929181294221 |
| 30.7324993130751 | 2.15975005269105 |
| 30.7349993130192 | 3.13553109448160 |
| 30.7374993129633 | 2.14994245846557 |
| 30.7399993129075 | 3.13649902184809 |
| 30.7424993128516 | 2.14073053969293 |
| 30.7449993127957 | 3.11407130940269 |
| 30.7474993127398 | 2.14341859639805 |
| 30.7499993126839 | 3.09178477773745 |
| 30.7524993126281 | 2.15026273843779 |
| 30.7549993125722 | 3.07605223808277 |
| 30.7574993125163 | 2.13782886987102 |
| 30.7599993124604 | 3.09692689502319 |
| 30.7624993124045 | 2.11603747054229 |
| 30.7649993123487 | 3.11968525260434 |
| 30.7674993122928 | 2.11734935507346 |
| 30.7699993122369 | 3.11691039107335 |
| 30.7724993121810 | 2.14951875000266 |
| 30.7749993121251 | 3.08061507067063 |
| 30.7774993120693 | 2.18363895676941 |
| 30.7799993120134 | 3.04716076488344 |
| 30.7824993119575 | 2.19686906362418 |
| 30.7849993119016 | 3.04487840267752 |
| 30.7874993118457 | 2.18620424915743 |
| 30.7899993117899 | 3.04198584614492 |
| 30.7924993117340 | 2.16726250485215 |
| 30.7949993116781 | 3.04804835393207 |
| 30.7974993116222 | 2.14690344891753 |
| 30.7999993115664 | 3.06282873988050 |
| 30.8024993115105 | 2.13512365735453 |
| 30.8049993114546 | 3.07805117698927 |
| 30.8074993113987 | 2.13430498157925 |
| 30.8099993113428 | 3.05807414075493 |
| 30.8124993112870 | 2.13420110739827 |
| 30.8149993112311 | 3.03335007108856 |
| 30.8174993111752 | 2.12180622860076 |
| 30.8199993111193 | 3.02301757396744 |
| 30.8224993110634 | 2.11107819027434 |



|                  |                  |
|------------------|------------------|
| 30.8249993110076 | 3.05231031522698 |
| 30.8274993109517 | 2.11581781846051 |
| 30.8299993108958 | 3.09024522927049 |
| 30.8324993108399 | 2.13316543645494 |
| 30.8349993107840 | 3.12103809933618 |
| 30.8374993107282 | 2.14829515099881 |
| 30.8399993106723 | 3.12224271954888 |
| 30.8424993106164 | 2.15995481535911 |
| 30.8449993105605 | 3.12886485997478 |
| 30.8474993105046 | 2.18597606883012 |
| 30.8499993104488 | 3.12579872795834 |
| 30.8524993103929 | 2.22341478962743 |
| 30.8549993103370 | 3.12061104429149 |
| 30.8574993102811 | 2.23920863558825 |
| 30.8599993102252 | 3.12062038370722 |
| 30.8624993101694 | 2.20623554736773 |
| 30.8649993101135 | 3.15115203440821 |
| 30.8674993100576 | 2.15702076879941 |
| 30.8699993100017 | 3.17748480148639 |
| 30.8724993099459 | 2.14158608944516 |
| 30.8749993098900 | 3.16134497007524 |
| 30.8774993098341 | 2.16289318238742 |
| 30.8799993097782 | 3.11166947178809 |
| 30.8824993097223 | 2.17549469509857 |
| 30.8849993096665 | 3.07099099463121 |
| 30.8874993096106 | 2.15023863877408 |
| 30.8899993095547 | 3.06305731637493 |
| 30.8924993094988 | 2.11099345297350 |
| 30.8949993094429 | 3.05699007216478 |
| 30.8974993093871 | 2.09257698919849 |
| 30.8999993093312 | 3.06130578778893 |
| 30.9024993092753 | 2.10089065774233 |
| 30.9049993092194 | 3.06190288257139 |
| 30.9074993091635 | 2.12244244097997 |
| 30.9099993091077 | 3.06555760435080 |
| 30.9124993090518 | 2.14681472986073 |
| 30.9149993089959 | 3.04146341022163 |
| 30.9174993089400 | 2.16602252976972 |
| 30.9199993088841 | 3.01828049913954 |
| 30.9224993088283 | 2.17397992195098 |
| 30.9249993087724 | 3.01907181718554 |
| 30.9274993087165 | 2.17217028876789 |
| 30.9299993086606 | 3.05649130700710 |
| 30.9324993086047 | 2.16269230028754 |
| 30.9349993085489 | 3.09744189739888 |
| 30.9374993084930 | 2.15626456580564 |
| 30.9399993084371 | 3.12127959265427 |
| 30.9424993083812 | 2.15305736430872 |
| 30.9449993083254 | 3.11399929331158 |
| 30.9474993082695 | 2.15320633187254 |
| 30.9499993082136 | 3.10847232206722 |
| 30.9524993081577 | 2.16113631204952 |

|                  |                  |
|------------------|------------------|
| 30.9549993081018 | 3.11277848265404 |
| 30.9574993080460 | 2.17465221415035 |
| 30.9599993079901 | 3.11449327902486 |
| 30.9624993079342 | 2.17145463102502 |
| 30.9649993078783 | 3.11422806643348 |
| 30.9674993078224 | 2.14652280482901 |
| 30.9699993077666 | 3.14660847343104 |
| 30.9724993077107 | 2.12973448894856 |
| 30.9749993076548 | 3.16965330662062 |
| 30.9774993075989 | 2.14800080314347 |
| 30.9799993075430 | 3.15606964589836 |
| 30.9824993074872 | 2.18575643824306 |
| 30.9849993074313 | 3.11471655949558 |
| 30.9874993073754 | 2.20213180273252 |
| 30.9899993073195 | 3.08705991865739 |
| 30.9924993072636 | 2.18986209147814 |
| 30.9949993072078 | 3.08795740205204 |
| 30.9974993071519 | 2.17077796489001 |
| 30.9999993070960 | 3.09619384980172 |
| 31.0024993070401 | 2.15649553961746 |
| 31.0049993069842 | 3.10061955831314 |
| 31.0074993069284 | 2.14136046397518 |
| 31.0099993068725 | 3.09011704850771 |
| 31.0124993068166 | 2.12574810627435 |
| 31.0149993067607 | 3.08529982453019 |
| 31.0174993067048 | 2.12835029890007 |
| 31.0199993066490 | 3.05255330709375 |
| 31.0224993065931 | 2.14464282645339 |
| 31.0249993065372 | 3.02528219214423 |
| 31.0274993064813 | 2.14864505654261 |
| 31.0299993064255 | 3.01659507938918 |
| 31.0324993063696 | 2.12402058324325 |
| 31.0349993063137 | 3.05408971854234 |
| 31.0374993062578 | 2.09973723906969 |
| 31.0399993062019 | 3.08473033310482 |
| 31.0424993061461 | 2.11296354554379 |
| 31.0449993060902 | 3.09899293915007 |
| 31.0474993060343 | 2.15289077444746 |
| 31.0499993059784 | 3.07969626684792 |
| 31.0524993059225 | 2.18480683047953 |
| 31.0549993058667 | 3.08093753758057 |
| 31.0574993058108 | 2.19296034766477 |
| 31.0599993057549 | 3.09140547781846 |
| 31.0624993056990 | 2.19127058961439 |
| 31.0649993056431 | 3.09798465683709 |
| 31.0674993055873 | 2.18498384315628 |
| 31.0699993055314 | 3.10777903660621 |
| 31.0724993054755 | 2.18126481276758 |
| 31.0749993054196 | 3.13405310266355 |
| 31.0774993053637 | 2.17727115887319 |
| 31.0799993053079 | 3.14570104420064 |
| 31.0824993052520 | 2.17298193186897 |

|                  |                  |
|------------------|------------------|
| 31.0849993051961 | 3.12159624743255 |
| 31.0874993051402 | 2.16116929005689 |
| 31.0899993050843 | 3.08511977472156 |
| 31.0924993050285 | 2.14746339998241 |
| 31.0949993049726 | 3.06540754953514 |
| 31.0974993049167 | 2.13614967419069 |
| 31.0999993048608 | 3.07006863922665 |
| 31.1024993048050 | 2.12936900587615 |
| 31.1049993047491 | 3.07511100367938 |
| 31.1074993046932 | 2.11666110875525 |
| 31.1099993046373 | 3.07860723809014 |
| 31.1124993045814 | 2.09828630388634 |
| 31.1149993045256 | 3.07471890206926 |
| 31.1174993044697 | 2.09921580395775 |
| 31.1199993044138 | 3.07566448891114 |
| 31.1224993043579 | 2.13861558393789 |
| 31.1249993043020 | 3.05339729552396 |
| 31.1274993042462 | 2.18923174122453 |
| 31.1299993041903 | 3.04025798841184 |
| 31.1324993041344 | 2.20319407010595 |
| 31.1349993040785 | 3.04272877975379 |
| 31.1374993040226 | 2.17595758171960 |
| 31.1399993039668 | 3.08208307296786 |
| 31.1424993039109 | 2.15246565641986 |
| 31.1449993038550 | 3.10360900652257 |
| 31.1474993037991 | 2.16632572417469 |
| 31.1499993037432 | 3.09959924627862 |
| 31.1524993036874 | 2.19323291864521 |
| 31.1549993036315 | 3.06930100068045 |
| 31.1574993035756 | 2.19177053323381 |
| 31.1599993035197 | 3.06093406136248 |
| 31.1624993034638 | 2.15501884440531 |
| 31.1649993034080 | 3.06512257169367 |
| 31.1674993033521 | 2.12057084113736 |
| 31.1699993032962 | 3.07164433941838 |
| 31.1724993032403 | 2.10533717433574 |
| 31.1749993031844 | 3.08299398858869 |
| 31.1774993031286 | 2.11335600940353 |
| 31.1799993030727 | 3.09851973757486 |
| 31.1824993030168 | 2.12611879522500 |
| 31.1849993029609 | 3.11015480150442 |
| 31.1874993029051 | 2.13984891589710 |
| 31.1899993028492 | 3.09474026313712 |
| 31.1924993027933 | 2.15334538978980 |
| 31.1949993027374 | 3.08214588311731 |
| 31.1974993026815 | 2.17709140286714 |
| 31.1999993026257 | 3.08420255041413 |
| 31.2024993025698 | 2.19827242113370 |
| 31.2049993025139 | 3.10763454797793 |
| 31.2074993024580 | 2.20939032999083 |
| 31.2099993024021 | 3.11789391850669 |
| 31.2124993023463 | 2.20479089877476 |

|                  |                  |
|------------------|------------------|
| 31.2149993022904 | 3.11876759985415 |
| 31.2174993022345 | 2.19049227825391 |
| 31.2199993021786 | 3.10234260725859 |
| 31.2224993021227 | 2.17750759468389 |
| 31.2249993020669 | 3.08900770876685 |
| 31.2274993020110 | 2.17360110393352 |
| 31.2299993019551 | 3.06576563179526 |
| 31.2324993018992 | 2.16465640922595 |
| 31.2349993018433 | 3.04422303661772 |
| 31.2374993017875 | 2.12942069488981 |
| 31.2399993017316 | 3.03936631088949 |
| 31.2424993016757 | 2.08563844974626 |
| 31.2449993016198 | 3.06214651688158 |
| 31.2474993015639 | 2.06852884458980 |
| 31.2499993015081 | 3.06904828892395 |
| 31.2524993014522 | 2.09641443840239 |
| 31.2549993013963 | 3.05507673995548 |
| 31.2574993013404 | 2.13440878982823 |
| 31.2599993012846 | 3.03455069229927 |
| 31.2624993012287 | 2.15632516087579 |
| 31.2649993011728 | 3.03884825353784 |
| 31.2674993011169 | 2.16414079454757 |
| 31.2699993010610 | 3.05693627679299 |
| 31.2724993010052 | 2.17736023138547 |
| 31.2749993009493 | 3.07991417210334 |
| 31.2774993008934 | 2.18353099085495 |
| 31.2799993008375 | 3.09917479167391 |
| 31.2824993007816 | 2.17821593818726 |
| 31.2849993007258 | 3.11691796827122 |
| 31.2874993006699 | 2.17076315546492 |
| 31.2899993006140 | 3.11804362869252 |
| 31.2924993005581 | 2.17696839476576 |
| 31.2949993005022 | 3.09532033773469 |
| 31.2974993004464 | 2.17680023846448 |
| 31.2999993003905 | 3.07877746112008 |
| 31.3024993003346 | 2.15481856142228 |
| 31.3049993002787 | 3.09045272872649 |
| 31.3074993002228 | 2.11231645887116 |
| 31.3099993001670 | 3.11814577112104 |
| 31.3124993001111 | 2.09204499923257 |
| 31.3149993000552 | 3.12453941234656 |
| 31.3174992999993 | 2.10791914859441 |
| 31.3199992999434 | 3.11407689098214 |
| 31.3224992998876 | 2.14142230387890 |
| 31.3249992998317 | 3.09343902968379 |
| 31.3274992997758 | 2.16823935218301 |
| 31.3299992997199 | 3.08874964790123 |
| 31.3324992996641 | 2.18642198481583 |
| 31.3349992996082 | 3.07144112196913 |
| 31.3374992995523 | 2.19456249488503 |
| 31.3399992994964 | 3.05948975111652 |
| 31.3424992994405 | 2.19112642358514 |

|                  |                  |
|------------------|------------------|
| 31.3449992993847 | 3.06864483719980 |
| 31.3474992993288 | 2.18461420986681 |
| 31.3499992992729 | 3.08846837567070 |
| 31.3524992992170 | 2.17551355255006 |
| 31.3549992991611 | 3.07376634190272 |
| 31.3574992991053 | 2.16124767345300 |
| 31.3599992990494 | 3.03929803140495 |
| 31.3624992989935 | 2.13478298227665 |
| 31.3649992989376 | 3.01283488518571 |
| 31.3674992988817 | 2.11437351622200 |
| 31.3699992988259 | 3.01413260560099 |
| 31.3724992987700 | 2.09970207908289 |
| 31.3749992987141 | 3.02619395687785 |
| 31.3774992986582 | 2.09452552040934 |
| 31.3799992986023 | 3.04623635696723 |
| 31.3824992985465 | 2.08186779713746 |
| 31.3849992984906 | 3.07097288266862 |
| 31.3874992984347 | 2.08357952889109 |
| 31.3899992983788 | 3.09584455722586 |
| 31.3924992983229 | 2.12404998246910 |
| 31.3949992982671 | 3.09889775941350 |
| 31.3974992982112 | 2.19719192200704 |
| 31.3999992981553 | 3.09139759531268 |
| 31.4024992980994 | 2.24616931499943 |
| 31.4049992980435 | 3.09598383239141 |
| 31.4074992979877 | 2.24605696019135 |
| 31.4099992979318 | 3.12647335822537 |
| 31.4124992978759 | 2.21696576649753 |
| 31.4149992978200 | 3.16568338029911 |
| 31.4174992977642 | 2.20458443873239 |
| 31.4199992977083 | 3.17583497070896 |
| 31.4224992976524 | 2.21283443071143 |
| 31.4249992975965 | 3.15779464047807 |
| 31.4274992975406 | 2.21351087215604 |
| 31.4299992974848 | 3.12447352362042 |
| 31.4324992974289 | 2.18338292947550 |
| 31.4349992973730 | 3.10408789169411 |
| 31.4374992973171 | 2.13923698107035 |
| 31.4399992972612 | 3.08022372637346 |
| 31.4424992972054 | 2.10203977300336 |
| 31.4449992971495 | 3.06841734133429 |
| 31.4474992970936 | 2.08091178834496 |
| 31.4499992970377 | 3.07334128936537 |
| 31.4524992969818 | 2.08160952603580 |
| 31.4549992969260 | 3.08873211135605 |
| 31.4574992968701 | 2.10163640831377 |
| 31.4599992968142 | 3.07131419010967 |
| 31.4624992967583 | 2.13386616527607 |
| 31.4649992967024 | 3.04215538652269 |
| 31.4674992966466 | 2.16832194666244 |
| 31.4699992965907 | 3.02638872328655 |
| 31.4724992965348 | 2.20653798793336 |

|                  |                  |
|------------------|------------------|
| 31.4749992964789 | 3.03883429603261 |
| 31.4774992964230 | 2.22737576975238 |
| 31.4799992963672 | 3.05417412770081 |
| 31.4824992963113 | 2.23300146679889 |
| 31.4849992962554 | 3.07114644337094 |
| 31.4874992961995 | 2.21463983730515 |
| 31.4899992961437 | 3.09064872374118 |
| 31.4924992960878 | 2.19297182667858 |
| 31.4949992960319 | 3.09675336407164 |
| 31.4974992959760 | 2.17944896681524 |
| 31.4999992959201 | 3.08635138494971 |
| 31.5024992958643 | 2.17829502706819 |
| 31.5049992958084 | 3.06325744891382 |
| 31.5074992957525 | 2.15278483828296 |
| 31.5099992956966 | 3.05830436252084 |
| 31.5124992956407 | 2.11111722284908 |
| 31.5149992955849 | 3.08061350612974 |
| 31.5174992955290 | 2.08104045823285 |
| 31.5199992954731 | 3.11365534824457 |
| 31.5224992954172 | 2.09064221664779 |
| 31.5249992953613 | 3.12467649271953 |
| 31.5274992953055 | 2.12686759919136 |
| 31.5299992952496 | 3.12333544919178 |
| 31.5324992951937 | 2.16416535830398 |
| 31.5349992951378 | 3.11620104428228 |
| 31.5374992950819 | 2.19715841505159 |
| 31.5399992950261 | 3.11801568355148 |
| 31.5424992949702 | 2.23261106004293 |
| 31.5449992949143 | 3.11508427384220 |
| 31.5474992948584 | 2.25828871723724 |
| 31.5499992948025 | 3.12320786837588 |
| 31.5524992947467 | 2.25060150318043 |
| 31.5549992946908 | 3.14476802749074 |
| 31.5574992946349 | 2.22607309143298 |
| 31.5599992945790 | 3.16747833202707 |
| 31.5624992945231 | 2.21506673672578 |
| 31.5649992944673 | 3.14544389598638 |
| 31.5674992944114 | 2.21964041187959 |
| 31.5699992943555 | 3.10006489564170 |
| 31.5724992942996 | 2.20672476114897 |
| 31.5749992942438 | 3.07467731304685 |
| 31.5774992941879 | 2.16503347101540 |
| 31.5799992941320 | 3.07944436916483 |
| 31.5824992940761 | 2.10901847077094 |
| 31.5849992940202 | 3.07823520635867 |
| 31.5874992939644 | 2.08301488040508 |
| 31.5899992939085 | 3.07244777833147 |
| 31.5924992938526 | 2.08569568690305 |
| 31.5949992937967 | 3.07455308858588 |
| 31.5974992937408 | 2.11074001475999 |
| 31.5999992936850 | 3.07441711559720 |
| 31.6024992936291 | 2.14225520442103 |



|                  |                  |
|------------------|------------------|
| 31.6049992935732 | 3.06978335797984 |
| 31.6074992935173 | 2.17733426988164 |
| 31.6099992934614 | 3.04489136983473 |
| 31.6124992934056 | 2.19491465688145 |
| 31.6149992933497 | 3.04888339036737 |
| 31.6174992932938 | 2.21193839415523 |
| 31.6199992932379 | 3.07753744581638 |
| 31.6224992931820 | 2.22264572904051 |
| 31.6249992931262 | 3.11197576711339 |
| 31.6274992930703 | 2.22290217215716 |
| 31.6299992930144 | 3.11245346534643 |
| 31.6324992929585 | 2.20122042583495 |
| 31.6349992929026 | 3.10481689197221 |
| 31.6374992928468 | 2.17034902987469 |
| 31.6399992927909 | 3.09624291130299 |
| 31.6424992927350 | 2.15165609015079 |
| 31.6449992926791 | 3.09064703664022 |
| 31.6474992926233 | 2.14866326877294 |
| 31.6499992925674 | 3.08407944092447 |
| 31.6524992925115 | 2.13390720916585 |
| 31.6549992924556 | 3.08118473428793 |
| 31.6574992923997 | 2.08443995025187 |
| 31.6599992923439 | 3.10895485796964 |
| 31.6624992922880 | 2.05664879624184 |
| 31.6649992922321 | 3.13295306242689 |
| 31.6674992921762 | 2.09597618500927 |
| 31.6699992921203 | 3.12084808955290 |
| 31.6724992920645 | 2.17750008415821 |
| 31.6749992920086 | 3.08915133291815 |
| 31.6774992919527 | 2.22575917097538 |
| 31.6799992918968 | 3.08832593815954 |
| 31.6824992918409 | 2.23358391500857 |
| 31.6849992917851 | 3.10474906977698 |
| 31.6874992917292 | 2.22563169114052 |
| 31.6899992916733 | 3.11875498581950 |
| 31.6924992916174 | 2.23198579070051 |
| 31.6949992915615 | 3.12629889837952 |
| 31.6974992915057 | 2.23648869112947 |
| 31.6999992914498 | 3.12481043586215 |
| 31.7024992913939 | 2.22853687204094 |
| 31.7049992913380 | 3.11741705021705 |
| 31.7074992912821 | 2.20295168616767 |
| 31.7099992912263 | 3.09200799446185 |
| 31.7124992911704 | 2.17058502236171 |
| 31.7149992911145 | 3.06355457098874 |
| 31.7174992910586 | 2.12990587490011 |
| 31.7199992910028 | 3.05747766845042 |
| 31.7224992909469 | 2.09663917830918 |
| 31.7249992908910 | 3.08890466232498 |
| 31.7274992908351 | 2.08283795628609 |
| 31.7299992907792 | 3.11184351757555 |
| 31.7324992907234 | 2.09658375860756 |

|                  |                  |
|------------------|------------------|
| 31.7349992906675 | 3.10661804254562 |
| 31.7374992906116 | 2.12465394760582 |
| 31.7399992905557 | 3.09938013770899 |
| 31.7424992904998 | 2.16394025782991 |
| 31.7449992904440 | 3.11209212159698 |
| 31.7474992903881 | 2.21608300048058 |
| 31.7499992903322 | 3.12937167898190 |
| 31.7524992902763 | 2.27135311432943 |
| 31.7549992902204 | 3.12786687827359 |
| 31.7574992901646 | 2.30537902218637 |
| 31.7599992901087 | 3.14143441574593 |
| 31.7624992900528 | 2.30567612317190 |
| 31.7649992899969 | 3.18143134970032 |
| 31.7674992899410 | 2.30036369739091 |
| 31.7699992898852 | 3.20773779891375 |
| 31.7724992898293 | 2.30535177411648 |
| 31.7749992897734 | 3.18917760478607 |
| 31.7774992897175 | 2.30681722661203 |
| 31.7799992896616 | 3.15414275943258 |
| 31.7824992896058 | 2.27316818686542 |
| 31.7849992895499 | 3.14778672052126 |
| 31.7874992894940 | 2.22751046137184 |
| 31.7899992894381 | 3.15881279593584 |
| 31.7924992893822 | 2.18110610008867 |
| 31.7949992893264 | 3.15812266648542 |
| 31.7974992892705 | 2.14355932469456 |
| 31.7999992892146 | 3.15559316103423 |
| 31.8024992891587 | 2.10372754386708 |
| 31.8049992891029 | 3.15790642846333 |
| 31.8074992890470 | 2.08672541768437 |
| 31.8099992889911 | 3.15035888341662 |
| 31.8124992889352 | 2.11130991222535 |
| 31.8149992888793 | 3.12058746128786 |
| 31.8174992888235 | 2.16391717790793 |
| 31.8199992887676 | 3.09235819152407 |
| 31.8224992887117 | 2.19739263454418 |
| 31.8249992886558 | 3.09072763804836 |
| 31.8274992885999 | 2.20175447439377 |
| 31.8299992885441 | 3.12348706666460 |
| 31.8324992884882 | 2.20522522731557 |
| 31.8349992884323 | 3.14955506026899 |
| 31.8374992883764 | 2.23439035741945 |
| 31.8399992883205 | 3.13519633984157 |
| 31.8424992882647 | 2.27037484148103 |
| 31.8449992882088 | 3.10266914451606 |
| 31.8474992881529 | 2.28050851076355 |
| 31.8499992880970 | 3.08129236395137 |
| 31.8524992880411 | 2.25681424196898 |
| 31.8549992879853 | 3.07494458726657 |
| 31.8574992879294 | 2.21363124864125 |
| 31.8599992878735 | 3.05803636656989 |
| 31.8624992878176 | 2.16421569445123 |

|                  |                  |
|------------------|------------------|
| 31.8649992877617 | 3.06027018986265 |
| 31.8674992877059 | 2.11357503240836 |
| 31.8699992876500 | 3.08141683510135 |
| 31.8724992875941 | 2.08692620558850 |
| 31.8749992875382 | 3.09382941269182 |
| 31.8774992874824 | 2.08547928809662 |
| 31.8799992874265 | 3.07019292130592 |
| 31.8824992873706 | 2.09262948471773 |
| 31.8849992873147 | 3.04224979901947 |
| 31.8874992872588 | 2.09817591640978 |
| 31.8899992872030 | 3.05062683037093 |
| 31.8924992871471 | 2.13028185979743 |
| 31.8949992870912 | 3.08052316713200 |
| 31.8974992870353 | 2.17454278492146 |
| 31.8999992869794 | 3.10523337689682 |
| 31.9024992869236 | 2.20925412606631 |
| 31.9049992868677 | 3.12316558507006 |
| 31.9074992868118 | 2.21697745504572 |
| 31.9099992867559 | 3.14564328056155 |
| 31.9124992867000 | 2.22379607103214 |
| 31.9149992866442 | 3.15014444514708 |
| 31.9174992865883 | 2.24493192406652 |
| 31.9199992865324 | 3.12968625539654 |
| 31.9224992864765 | 2.27343327682406 |
| 31.9249992864206 | 3.09636955241231 |
| 31.9274992863648 | 2.25948158607080 |
| 31.9299992863089 | 3.09052419215738 |
| 31.9324992862530 | 2.19311473714737 |
| 31.9349992861971 | 3.11615446363639 |
| 31.9374992861412 | 2.11860701968298 |
| 31.9399992860854 | 3.13618303743356 |
| 31.9424992860295 | 2.09056136245100 |
| 31.9449992859736 | 3.11134508190606 |
| 31.9474992859177 | 2.10340838144427 |
| 31.9499992858618 | 3.06767808609492 |
| 31.9524992858060 | 2.11057189234814 |
| 31.9549992857501 | 3.05094673030832 |
| 31.9574992856942 | 2.10513356145519 |
| 31.9599992856383 | 3.04881449509149 |
| 31.9624992855825 | 2.10754727267884 |
| 31.9649992855266 | 3.03889480688819 |
| 31.9674992854707 | 2.12483559462091 |
| 31.9699992854148 | 3.05125236255558 |
| 31.9724992853589 | 2.14171609718399 |
| 31.9749992853031 | 3.08710041968463 |
| 31.9774992852472 | 2.17007869773011 |
| 31.9799992851913 | 3.10710025783849 |
| 31.9824992851354 | 2.20736418604520 |
| 31.9849992850795 | 3.08390727826697 |
| 31.9874992850237 | 2.23305065276608 |
| 31.9899992849678 | 3.04851151923705 |
| 31.9924992849119 | 2.22451405775576 |

|                  |                  |
|------------------|------------------|
| 31.9949992848560 | 3.05316507058151 |
| 31.9974992848001 | 2.19828678959070 |
| 31.9999992847443 | 3.08401220805155 |
| 32.0024992846884 | 2.16422161271044 |
| 32.0049992846325 | 3.10270373624715 |
| 32.0074992845766 | 2.14002916920331 |
| 32.0099992845207 | 3.09679618355374 |
| 32.0124992844649 | 2.11208717408018 |
| 32.0149992844090 | 3.09752953156560 |
| 32.0174992843531 | 2.09481565788544 |
| 32.0199992842972 | 3.09303379314323 |
| 32.0224992842413 | 2.10402934608955 |
| 32.0249992841855 | 3.08117986517178 |
| 32.0274992841296 | 2.13584396150164 |
| 32.0299992840737 | 3.05292746758304 |
| 32.0324992840178 | 2.14475723088768 |
| 32.0349992839620 | 3.05933203262706 |
| 32.0374992839061 | 2.13799502859712 |
| 32.0399992838502 | 3.10241815000461 |
| 32.0424992837943 | 2.14492254003192 |
| 32.0449992837384 | 3.12888161000077 |
| 32.0474992836826 | 2.17790339636105 |
| 32.0499992836267 | 3.10868955974781 |
| 32.0524992835708 | 2.20784315582425 |
| 32.0549992835149 | 3.07501894943186 |
| 32.0574992834590 | 2.21298383095178 |
| 32.0599992834032 | 3.06922301703232 |
| 32.0624992833473 | 2.20583665418158 |
| 32.0649992832914 | 3.06744953666739 |
| 32.0674992832355 | 2.18842220767223 |
| 32.0699992831796 | 3.06372649220210 |
| 32.0724992831238 | 2.15355397664512 |
| 32.0749992830679 | 3.07091107563114 |
| 32.0774992830120 | 2.09593379412471 |
| 32.0799992829561 | 3.10107930633933 |
| 32.0824992829002 | 2.06776876477473 |
| 32.0849992828444 | 3.10191521407807 |
| 32.0874992827885 | 2.09104270962838 |
| 32.0899992827326 | 3.06788722803658 |
| 32.0924992826767 | 2.13553326133053 |
| 32.0949992826208 | 3.03605347234415 |
| 32.0974992825650 | 2.14527089672750 |
| 32.0999992825091 | 3.05468480420845 |
| 32.1024992824532 | 2.13100032327590 |
| 32.1049992823973 | 3.09833395332718 |
| 32.1074992823415 | 2.13062118331603 |
| 32.1099992822856 | 3.12351252390302 |
| 32.1124992822297 | 2.16569452796672 |
| 32.1149992821738 | 3.12458164816636 |
| 32.1174992821179 | 2.20324402273103 |
| 32.1199992820621 | 3.11599288973162 |
| 32.1224992820062 | 2.22192469611236 |

|                  |                  |
|------------------|------------------|
| 32.1249992819503 | 3.11513723534438 |
| 32.1274992818944 | 2.22344487342614 |
| 32.1299992818385 | 3.09469643818727 |
| 32.1324992817827 | 2.21565508608199 |
| 32.1349992817268 | 3.06634167516048 |
| 32.1374992816709 | 2.18269524263512 |
| 32.1399992816150 | 3.07217607852447 |
| 32.1424992815591 | 2.13968803317376 |
| 32.1449992815033 | 3.11178188571468 |
| 32.1474992814474 | 2.11443586962031 |
| 32.1499992813915 | 3.11795327868748 |
| 32.1524992813356 | 2.11196020641110 |
| 32.1549992812797 | 3.07624717759936 |
| 32.1574992812239 | 2.10672851502608 |
| 32.1599992811680 | 3.03961315583891 |
| 32.1624992811121 | 2.10355323217503 |
| 32.1649992810562 | 3.04819971794992 |
| 32.1674992810003 | 2.12462534997420 |
| 32.1699992809445 | 3.06088740297222 |
| 32.1724992808886 | 2.15545792505398 |
| 32.1749992808327 | 3.05815809515793 |
| 32.1774992807768 | 2.16386115100623 |
| 32.1799992807209 | 3.07737423510027 |
| 32.1824992806651 | 2.14802395449771 |
| 32.1849992806092 | 3.11962790435670 |
| 32.1874992805533 | 2.16117475978853 |
| 32.1899992804974 | 3.12862688664021 |
| 32.1924992804416 | 2.21081880851959 |
| 32.1949992803857 | 3.09212789269057 |
| 32.1974992803298 | 2.25628500097793 |
| 32.1999992802739 | 3.05863404114091 |
| 32.2024992802180 | 2.23877171187707 |
| 32.2049992801622 | 3.07811024062654 |
| 32.2074992801063 | 2.18502008499007 |
| 32.2099992800504 | 3.12210635065143 |
| 32.2124992799945 | 2.14257362043455 |
| 32.2149992799386 | 3.14193344279824 |
| 32.2174992798828 | 2.14225987094447 |
| 32.2199992798269 | 3.12790382872540 |
| 32.2224992797710 | 2.14883917606204 |
| 32.2249992797151 | 3.11199346258857 |
| 32.2274992796592 | 2.14223220548124 |
| 32.2299992796034 | 3.11423779418769 |
| 32.2324992795475 | 2.13957750194448 |
| 32.2349992794916 | 3.09920151787279 |
| 32.2374992794357 | 2.15298497544549 |
| 32.2399992793798 | 3.07547276917013 |
| 32.2424992793240 | 2.15747176553136 |
| 32.2449992792681 | 3.09210891873119 |
| 32.2474992792122 | 2.14975340384752 |
| 32.2499992791563 | 3.14411432120828 |
| 32.2524992791004 | 2.16551987338168 |

|                  |                  |
|------------------|------------------|
| 32.2549992790446 | 3.15881982576879 |
| 32.2574992789887 | 2.20837796361674 |
| 32.2599992789328 | 3.11818208248300 |
| 32.2624992788769 | 2.24300356523413 |
| 32.2649992788211 | 3.08286769076018 |
| 32.2674992787652 | 2.25220052844990 |
| 32.2699992787093 | 3.09179096526447 |
| 32.2724992786534 | 2.25354894864678 |
| 32.2749992785975 | 3.10844061760121 |
| 32.2774992785417 | 2.25246511614209 |
| 32.2799992784858 | 3.09923623169887 |
| 32.2824992784299 | 2.24086048675414 |
| 32.2849992783740 | 3.10674050532548 |
| 32.2874992783181 | 2.20970950565136 |
| 32.2899992782623 | 3.13347392081089 |
| 32.2924992782064 | 2.18964620804503 |
| 32.2949992781505 | 3.13653271197671 |
| 32.2974992780946 | 2.19348248916307 |
| 32.2999992780387 | 3.10064540037877 |
| 32.3024992779829 | 2.20138903041739 |
| 32.3049992779270 | 3.05932750102813 |
| 32.3074992778711 | 2.17757613855842 |
| 32.3099992778152 | 3.07432537446348 |
| 32.3124992777593 | 2.15527130399354 |
| 32.3149992777035 | 3.11042760766008 |
| 32.3174992776476 | 2.15556317277527 |
| 32.3199992775917 | 3.13299998276364 |
| 32.3224992775358 | 2.17723873980921 |
| 32.3249992774799 | 3.12588455949416 |
| 32.3274992774241 | 2.19272081219566 |
| 32.3299992773682 | 3.12911105360388 |
| 32.3324992773123 | 2.21463515790254 |
| 32.3349992772564 | 3.13333601814520 |
| 32.3374992772005 | 2.25844112396781 |
| 32.3399992771447 | 3.12556529151672 |
| 32.3424992770888 | 2.30803306302401 |
| 32.3449992770329 | 3.10688741747846 |
| 32.3474992769770 | 2.32523691336560 |
| 32.3499992769212 | 3.12591656413347 |
| 32.3524992768653 | 2.30177840924990 |
| 32.3549992768094 | 3.18565988319563 |
| 32.3574992767535 | 2.29236050269084 |
| 32.3599992766976 | 3.21422885482335 |
| 32.3624992766418 | 2.31683689261739 |
| 32.3649992765859 | 3.19099993057537 |
| 32.3674992765300 | 2.34771388865211 |
| 32.3699992764741 | 3.15383954152490 |
| 32.3724992764182 | 2.34001939095662 |
| 32.3749992763624 | 3.16701208075956 |
| 32.3774992763065 | 2.30840457709518 |
| 32.3799992762506 | 3.18313192235352 |
| 32.3824992761947 | 2.27629537324575 |



|                  |                  |
|------------------|------------------|
| 32.3849992761388 | 3.17589188930889 |
| 32.3874992760830 | 2.25817611544826 |
| 32.3899992760271 | 3.17533483789741 |
| 32.3924992759712 | 2.23715101186800 |
| 32.3949992759153 | 3.20208385340687 |
| 32.3974992758594 | 2.22326996434666 |
| 32.3999992758036 | 3.21034658192990 |
| 32.4024992757477 | 2.22236610954586 |
| 32.4049992756918 | 3.17182051819172 |
| 32.4074992756359 | 2.21896236456322 |
| 32.4099992755800 | 3.11948988466015 |
| 32.4124992755242 | 2.19922612762240 |
| 32.4149992754683 | 3.11534071801625 |
| 32.4174992754124 | 2.18782191723778 |
| 32.4199992753565 | 3.13120168972329 |
| 32.4224992753007 | 2.19499912759049 |
| 32.4249992752448 | 3.12855873771838 |
| 32.4274992751889 | 2.19849838623980 |
| 32.4299992751330 | 3.10768505250098 |
| 32.4324992750771 | 2.18065793797056 |
| 32.4349992750213 | 3.10454742395554 |
| 32.4374992749654 | 2.16938938396476 |
| 32.4399992749095 | 3.09871631292702 |
| 32.4424992748536 | 2.19197705184840 |
| 32.4449992747977 | 3.06955230412417 |
| 32.4474992747419 | 2.22326621577556 |
| 32.4499992746860 | 3.02964756452298 |
| 32.4524992746301 | 2.22271462301079 |
| 32.4549992745742 | 3.02513201981352 |
| 32.4574992745183 | 2.17923963614835 |
| 32.4599992744625 | 3.06805331728199 |
| 32.4624992744066 | 2.14449459696125 |
| 32.4649992743507 | 3.09713737970872 |
| 32.4674992742948 | 2.14486702255991 |
| 32.4699992742389 | 3.09002176788627 |
| 32.4724992741831 | 2.16703821588937 |
| 32.4749992741272 | 3.06304658400962 |
| 32.4774992740713 | 2.16736002500761 |
| 32.4799992740154 | 3.07410605997142 |
| 32.4824992739595 | 2.16499337718641 |
| 32.4849992739037 | 3.08934526533212 |
| 32.4874992738478 | 2.16905252964330 |
| 32.4899992737919 | 3.09499617946937 |
| 32.4924992737360 | 2.17525472061228 |
| 32.4949992736802 | 3.11449877970003 |
| 32.4974992736243 | 2.16568298585804 |
| 32.4999992735684 | 3.16934785857674 |
| 32.5024992735125 | 2.17107112014001 |
| 32.5049992734566 | 3.20020491942641 |
| 32.5074992734008 | 2.21140953985688 |
| 32.5099992733449 | 3.18066631579281 |
| 32.5124992732890 | 2.25820352381312 |

|                  |                  |
|------------------|------------------|
| 32.5149992732331 | 3.15180001249461 |
| 32.5174992731772 | 2.27756865998679 |
| 32.5199992731214 | 3.16395247512490 |
| 32.5224992730655 | 2.26943404541242 |
| 32.5249992730096 | 3.19998074162049 |
| 32.5274992729537 | 2.26521855041605 |
| 32.5299992728978 | 3.21202244765459 |
| 32.5324992728420 | 2.26673311083021 |
| 32.5349992727861 | 3.20907882429616 |
| 32.5374992727302 | 2.26732827149886 |
| 32.5399992726743 | 3.20610182254619 |
| 32.5424992726184 | 2.26418436795726 |
| 32.5449992725626 | 3.20127404188942 |
| 32.5474992725067 | 2.26376363997746 |
| 32.5499992724508 | 3.17521731213534 |
| 32.5524992723949 | 2.25354183054165 |
| 32.5549992723390 | 3.13142939353213 |
| 32.5574992722832 | 2.22734049162695 |
| 32.5599992722273 | 3.11526384544247 |
| 32.5624992721714 | 2.18917170736902 |
| 32.5649992721155 | 3.13445648055688 |
| 32.5674992720596 | 2.17026351854585 |
| 32.5699992720038 | 3.14337955796639 |
| 32.5724992719479 | 2.17163053649050 |
| 32.5749992718920 | 3.11677932747652 |
| 32.5774992718361 | 2.16701681447122 |
| 32.5799992717803 | 3.08305557188287 |
| 32.5824992717244 | 2.15074069849529 |
| 32.5849992716685 | 3.07516794256086 |
| 32.5874992716126 | 2.16096109108771 |
| 32.5899992715567 | 3.06904987274580 |
| 32.5924992715009 | 2.19864294308512 |
| 32.5949992714450 | 3.05263697143732 |
| 32.5974992713891 | 2.21722122214045 |
| 32.5999992713332 | 3.05518269247585 |
| 32.6024992712773 | 2.19609966679771 |
| 32.6049992712215 | 3.09997901014458 |
| 32.6074992711656 | 2.17608554446580 |
| 32.6099992711097 | 3.13024783472236 |
| 32.6124992710538 | 2.19828659181509 |
| 32.6149992709979 | 3.11577783540178 |
| 32.6174992709421 | 2.23919087446895 |
| 32.6199992708862 | 3.08525119720162 |
| 32.6224992708303 | 2.25883157009238 |
| 32.6249992707744 | 3.09676972079698 |
| 32.6274992707185 | 2.23876063947087 |
| 32.6299992706627 | 3.12778602278752 |
| 32.6324992706068 | 2.21444633945440 |
| 32.6349992705509 | 3.14631569683495 |
| 32.6374992704950 | 2.19721445834447 |
| 32.6399992704391 | 3.16366281300220 |
| 32.6424992703833 | 2.19328323497422 |

|                  |                  |
|------------------|------------------|
| 32.6449992703274 | 3.18236634716260 |
| 32.6474992702715 | 2.19910761449207 |
| 32.6499992702156 | 3.19113696294675 |
| 32.6524992701598 | 2.21583695523024 |
| 32.6549992701039 | 3.17113452093979 |
| 32.6574992700480 | 2.22494365773024 |
| 32.6599992699921 | 3.14081611415536 |
| 32.6624992699362 | 2.21869517116886 |
| 32.6649992698804 | 3.14186748908129 |
| 32.6674992698245 | 2.20327014738910 |
| 32.6699992697686 | 3.17087380272773 |
| 32.6724992697127 | 2.19688711775753 |
| 32.6749992696568 | 3.18811758660122 |
| 32.6774992696010 | 2.20940263586269 |
| 32.6799992695451 | 3.16767735490627 |
| 32.6824992694892 | 2.21771958248219 |
| 32.6849992694333 | 3.13768293412034 |
| 32.6874992693774 | 2.21679344406149 |
| 32.6899992693216 | 3.11822088956475 |
| 32.6924992692657 | 2.21782407501294 |
| 32.6949992692098 | 3.10178140897936 |
| 32.6974992691539 | 2.22589247520203 |
| 32.6999992690980 | 3.07384783077400 |
| 32.7024992690422 | 2.20588708523669 |
| 32.7049992689863 | 3.06207664035994 |
| 32.7074992689304 | 2.16679757500210 |
| 32.7099992688745 | 3.08531329780381 |
| 32.7124992688186 | 2.13784270537381 |
| 32.7149992687628 | 3.09011945402326 |
| 32.7174992687069 | 2.14115368755094 |
| 32.7199992686510 | 3.06019520694007 |
| 32.7224992685951 | 2.14986531950934 |
| 32.7249992685392 | 3.01823275907790 |
| 32.7274992684834 | 2.14066110689338 |
| 32.7299992684275 | 3.01795719508064 |
| 32.7324992683716 | 2.12207225194714 |
| 32.7349992683157 | 3.03138608269913 |
| 32.7374992682599 | 2.12489848931120 |
| 32.7399992682040 | 3.04483264813717 |
| 32.7424992681481 | 2.13737156303086 |
| 32.7449992680922 | 3.06143196368562 |
| 32.7474992680363 | 2.13750239577059 |
| 32.7499992679805 | 3.09629549866708 |
| 32.7524992679246 | 2.14228050218663 |
| 32.7549992678687 | 3.11536386395522 |
| 32.7574992678128 | 2.17742883548900 |
| 32.7599992677569 | 3.10192815872596 |
| 32.7624992677011 | 2.22172431661401 |
| 32.7649992676452 | 3.08654867024594 |
| 32.7674992675893 | 2.23542419905395 |
| 32.7699992675334 | 3.11046578928526 |
| 32.7724992674775 | 2.21098294703555 |

|                  |                  |
|------------------|------------------|
| 32.7749992674217 | 3.16131895848948 |
| 32.7774992673658 | 2.17888071492682 |
| 32.7799992673099 | 3.18631552481561 |
| 32.7824992672540 | 2.17178445437387 |
| 32.7849992671981 | 3.17932661921436 |
| 32.7874992671423 | 2.17928113464165 |
| 32.7899992670864 | 3.15675221882444 |
| 32.7924992670305 | 2.18612872964128 |
| 32.7949992669746 | 3.15006243256892 |
| 32.7974992669187 | 2.18373666067317 |
| 32.7999992668629 | 3.13297515719196 |
| 32.8024992668070 | 2.17142617698737 |
| 32.8049992667511 | 3.09962882542184 |
| 32.8074992666952 | 2.13527457186002 |
| 32.8099992666394 | 3.09314876284701 |
| 32.8124992665835 | 2.10646696703129 |
| 32.8149992665276 | 3.11764803539479 |
| 32.8174992664717 | 2.11278470390099 |
| 32.8199992664158 | 3.11008424286835 |
| 32.8224992663600 | 2.14762472137313 |
| 32.8249992663041 | 3.06265102997681 |
| 32.8274992662482 | 2.16334856835485 |
| 32.8299992661923 | 3.01475319728780 |
| 32.8324992661364 | 2.15427288298442 |
| 32.8349992660806 | 3.01514924474826 |
| 32.8374992660247 | 2.14467391852771 |
| 32.8399992659688 | 3.02556026519949 |
| 32.8424992659129 | 2.15061417955825 |
| 32.8449992658570 | 3.02938729227908 |
| 32.8474992658012 | 2.15147157184310 |
| 32.8499992657453 | 3.03404486122470 |
| 32.8524992656894 | 2.12659330055420 |
| 32.8549992656335 | 3.05911804197795 |
| 32.8574992655776 | 2.11005614089886 |
| 32.8599992655218 | 3.06816406153745 |
| 32.8624992654659 | 2.12877315542779 |
| 32.8649992654100 | 3.05257738534472 |
| 32.8674992653541 | 2.16241358508196 |
| 32.8699992652982 | 3.04313668275761 |
| 32.8724992652424 | 2.15836484495903 |
| 32.8749992651865 | 3.07945429316105 |
| 32.8774992651306 | 2.13112071512901 |
| 32.8799992650747 | 3.13485212192378 |
| 32.8824992650189 | 2.12344601162309 |
| 32.8849992649630 | 3.15808639425412 |
| 32.8874992649071 | 2.15315975057263 |
| 32.8899992648512 | 3.15274017670645 |
| 32.8924992647953 | 2.18667987064431 |
| 32.8949992647395 | 3.14453109677516 |
| 32.8974992646836 | 2.20316692529209 |
| 32.8999992646277 | 3.15757990842956 |
| 32.9024992645718 | 2.20917274069865 |

|                  |                  |
|------------------|------------------|
| 32.9049992645159 | 3.14526800530241 |
| 32.9074992644601 | 2.21101343490219 |
| 32.9099992644042 | 3.12621086816373 |
| 32.9124992643483 | 2.19126468796515 |
| 32.9149992642924 | 3.13419972400292 |
| 32.9174992642365 | 2.15780253336236 |
| 32.9199992641807 | 3.15887631006692 |
| 32.9224992641248 | 2.14433205511507 |
| 32.9249992640689 | 3.14252640500951 |
| 32.9274992640130 | 2.15652910201787 |
| 32.9299992639571 | 3.08074100951849 |
| 32.9324992639013 | 2.15701447279104 |
| 32.9349992638454 | 3.03830631074897 |
| 32.9374992637895 | 2.13661500226714 |
| 32.9399992637336 | 3.04005264686058 |
| 32.9424992636777 | 2.11445362699989 |
| 32.9449992636219 | 3.05484305391488 |
| 32.9474992635660 | 2.10792567969224 |
| 32.9499992635101 | 3.04715966619703 |
| 32.9524992634542 | 2.11018900613997 |
| 32.9549992633983 | 3.04757631586249 |
| 32.9574992633425 | 2.11610614691088 |
| 32.9599992632866 | 3.05982449745570 |
| 32.9624992632307 | 2.14392434007639 |
| 32.9649992631748 | 3.06487328312444 |
| 32.9674992631190 | 2.18529769387537 |
| 32.9699992630631 | 3.04842834812514 |
| 32.9724992630072 | 2.20931942886197 |
| 32.9749992629513 | 3.03869234470306 |
| 32.9774992628954 | 2.18824654529374 |
| 32.9799992628396 | 3.08091801850422 |
| 32.9824992627837 | 2.16690711119743 |
| 32.9849992627278 | 3.13252676989759 |
| 32.9874992626719 | 2.17184812903228 |
| 32.9899992626160 | 3.14708449314488 |
| 32.9924992625602 | 2.19189464356730 |
| 32.9949992625043 | 3.12432778940831 |
| 32.9974992624484 | 2.18079282227565 |
| 32.9999992623925 | 3.12147681274121 |
| 33.0024992623366 | 2.15082933959787 |
| 33.0049992622808 | 3.13638294671728 |
| 33.0074992622249 | 2.14030952919689 |
| 33.0099992621690 | 3.13393051196018 |
| 33.0124992621131 | 2.15525927713350 |
| 33.0149992620572 | 3.11479091828553 |
| 33.0174992620014 | 2.15274019629007 |
| 33.0199992619455 | 3.12917437384848 |
| 33.0224992618896 | 2.12157453820647 |
| 33.0249992618337 | 3.16082977835678 |
| 33.0274992617778 | 2.11636389031022 |
| 33.0299992617220 | 3.15079325460796 |
| 33.0324992616661 | 2.15739042457641 |

|                  |                  |
|------------------|------------------|
| 33.0349992616102 | 3.09736232538236 |
| 33.0374992615543 | 2.20493025264429 |
| 33.0399992614985 | 3.06252277161836 |
| 33.0424992614426 | 2.21412540071808 |
| 33.0449992613867 | 3.07321391693338 |
| 33.0474992613308 | 2.19258041383777 |
| 33.0499992612749 | 3.08183587630701 |
| 33.0524992612191 | 2.16554170178018 |
| 33.0549992611632 | 3.07177821290079 |
| 33.0574992611073 | 2.15024055328607 |
| 33.0599992610514 | 3.06003815458076 |
| 33.0624992609955 | 2.14401085484892 |
| 33.0649992609397 | 3.05119525701290 |
| 33.0674992608838 | 2.14923345657586 |
| 33.0699992608279 | 3.03622093958559 |
| 33.0724992607720 | 2.14908555184199 |
| 33.0749992607161 | 3.00504767172802 |
| 33.0774992606603 | 2.12662040871003 |
| 33.0799992606044 | 2.98731310106222 |
| 33.0824992605485 | 2.08604687272506 |
| 33.0849992604926 | 3.02670131149227 |
| 33.0874992604367 | 2.07858378671368 |
| 33.0899992603809 | 3.06944955383909 |
| 33.0924992603250 | 2.11704611177249 |
| 33.0949992602691 | 3.08347564351707 |
| 33.0974992602132 | 2.16216367049490 |
| 33.0999992601573 | 3.07154407237158 |
| 33.1024992601015 | 2.17402480395740 |
| 33.1049992600456 | 3.08774240129338 |
| 33.1074992599897 | 2.18333684634621 |
| 33.1099992599338 | 3.11393229227146 |
| 33.1124992598779 | 2.21266367802475 |
| 33.1149992598221 | 3.12878447836121 |
| 33.1174992597662 | 2.24612292226272 |
| 33.1199992597103 | 3.13171958804823 |
| 33.1224992596544 | 2.24322785575474 |
| 33.1249992595986 | 3.15767664925733 |
| 33.1274992595427 | 2.21007001478822 |
| 33.1299992594868 | 3.18902506233410 |
| 33.1324992594309 | 2.19184611549739 |
| 33.1349992593750 | 3.17918728006153 |
| 33.1374992593192 | 2.20281949540992 |
| 33.1399992592633 | 3.13896058171188 |
| 33.1424992592074 | 2.21430350856855 |
| 33.1449992591515 | 3.10801404598596 |
| 33.1474992590956 | 2.18945044520880 |
| 33.1499992590398 | 3.11843235331007 |
| 33.1524992589839 | 2.15474800388909 |
| 33.1549992589280 | 3.11602488928330 |
| 33.1574992588721 | 2.13315706143031 |
| 33.1599992588162 | 3.10362390656052 |
| 33.1624992587604 | 2.13433761520641 |



|                  |                  |
|------------------|------------------|
| 33.1649992587045 | 3.08045699215311 |
| 33.1674992586486 | 2.14198093674500 |
| 33.1699992585927 | 3.07315739073888 |
| 33.1724992585368 | 2.16279941013539 |
| 33.1749992584810 | 3.05132651183874 |
| 33.1774992584251 | 2.18599645868194 |
| 33.1799992583692 | 3.01424252461228 |
| 33.1824992583133 | 2.19716390385856 |
| 33.1849992582574 | 2.99649862131522 |
| 33.1874992582016 | 2.18261232275890 |
| 33.1899992581457 | 3.02692401362324 |
| 33.1924992580898 | 2.16581612068846 |
| 33.1949992580339 | 3.06089196590977 |
| 33.1974992579781 | 2.17173478774665 |
| 33.1999992579222 | 3.05516551022494 |
| 33.2024992578663 | 2.18768444393267 |
| 33.2049992578104 | 3.03164574918509 |
| 33.2074992577545 | 2.18639140197175 |
| 33.2099992576987 | 3.03258660131628 |
| 33.2124992576428 | 2.17106765914285 |
| 33.2149992575869 | 3.06321796793519 |
| 33.2174992575310 | 2.15963036807922 |
| 33.2199992574751 | 3.07969065700128 |
| 33.2224992574193 | 2.15237163339907 |
| 33.2249992573634 | 3.08866032138029 |
| 33.2274992573075 | 2.14429791572603 |
| 33.2299992572516 | 3.11658771021032 |
| 33.2324992571957 | 2.14868990776985 |
| 33.2349992571399 | 3.14838774083403 |
| 33.2374992570840 | 2.17991019450389 |
| 33.2399992570281 | 3.14731143453250 |
| 33.2424992569722 | 2.21624614510686 |
| 33.2449992569163 | 3.12252541244071 |
| 33.2474992568605 | 2.22738166187611 |
| 33.2499992568046 | 3.11651122739418 |
| 33.2524992567487 | 2.21891587376043 |
| 33.2549992566928 | 3.14475223638588 |
| 33.2574992566369 | 2.23199701103608 |
| 33.2599992565811 | 3.15656472600500 |
| 33.2624992565252 | 2.25536926474801 |
| 33.2649992564693 | 3.14328118255256 |
| 33.2674992564134 | 2.25793174267514 |
| 33.2699992563576 | 3.12034415665404 |
| 33.2724992563017 | 2.22604399380965 |
| 33.2749992562458 | 3.11719043374655 |
| 33.2774992561899 | 2.20523729674654 |
| 33.2799992561340 | 3.09879034191263 |
| 33.2824992560782 | 2.20580438297098 |
| 33.2849992560223 | 3.06076974765254 |
| 33.2874992559664 | 2.20870216996339 |
| 33.2899992559105 | 3.03519803840310 |
| 33.2924992558546 | 2.17361356032506 |

|                  |                  |
|------------------|------------------|
| 33.2949992557988 | 3.05558250464048 |
| 33.2974992557429 | 2.12154739541708 |
| 33.2999992556870 | 3.08170861944263 |
| 33.3024992556311 | 2.10546585734227 |
| 33.3049992555752 | 3.06842022643787 |
| 33.3074992555194 | 2.13629154506823 |
| 33.3099992554635 | 3.03521503822349 |
| 33.3124992554076 | 2.17661745762295 |
| 33.3149992553517 | 3.02744988606335 |
| 33.3174992552958 | 2.19548470956393 |
| 33.3199992552400 | 3.05481778548148 |
| 33.3224992551841 | 2.20598583467392 |
| 33.3249992551282 | 3.06467989462423 |
| 33.3274992550723 | 2.21418960609542 |
| 33.3299992550164 | 3.08185100036098 |
| 33.3324992549606 | 2.22900506880290 |
| 33.3349992549047 | 3.11727764288040 |
| 33.3374992548488 | 2.25042121962756 |
| 33.3399992547929 | 3.15106974098861 |
| 33.3424992547370 | 2.28582356516617 |
| 33.3449992546812 | 3.15141622183821 |
| 33.3474992546253 | 2.30888748700776 |
| 33.3499992545694 | 3.12860882204231 |
| 33.3524992545135 | 2.30262923896032 |
| 33.3549992544577 | 3.13635468341975 |
| 33.3574992544018 | 2.27463710333099 |
| 33.3599992543459 | 3.17559001574290 |
| 33.3624992542900 | 2.26396871662154 |
| 33.3649992542341 | 3.21162335338283 |
| 33.3674992541783 | 2.27004717544746 |
| 33.3699992541224 | 3.21164080928892 |
| 33.3724992540665 | 2.26646727839384 |
| 33.3749992540106 | 3.20426816489553 |
| 33.3774992539547 | 2.24261280317089 |
| 33.3799992538989 | 3.20440819477934 |
| 33.3824992538430 | 2.22737628607472 |
| 33.3849992537871 | 3.20126779440677 |
| 33.3874992537312 | 2.23398710865887 |
| 33.3899992536753 | 3.17440335993648 |
| 33.3924992536195 | 2.24620598645160 |
| 33.3949992535636 | 3.14264391470669 |
| 33.3974992535077 | 2.23458938226892 |
| 33.3999992534518 | 3.14706885981432 |
| 33.4024992533959 | 2.21490497128906 |
| 33.4049992533401 | 3.16042345459275 |
| 33.4074992532842 | 2.21442471027804 |
| 33.4099992532283 | 3.14486133590020 |
| 33.4124992531724 | 2.22993606581310 |
| 33.4149992531165 | 3.09874830500462 |
| 33.4174992530607 | 2.23695786474645 |
| 33.4199992530048 | 3.06640344825498 |
| 33.4224992529489 | 2.23256100696174 |

|                  |                  |
|------------------|------------------|
| 33.4249992528930 | 3.05508052195519 |
| 33.4274992528372 | 2.23997238798741 |
| 33.4299992527813 | 3.04075477258147 |
| 33.4324992527254 | 2.24172868834679 |
| 33.4349992526695 | 3.02873442782113 |
| 33.4374992526136 | 2.22513216197713 |
| 33.4399992525578 | 3.05037734209327 |
| 33.4424992525019 | 2.18976743958668 |
| 33.4449992524460 | 3.08649762001172 |
| 33.4474992523901 | 2.17892017259238 |
| 33.4499992523342 | 3.08751188469777 |
| 33.4524992522784 | 2.19275600296636 |
| 33.4549992522225 | 3.05928976212797 |
| 33.4574992521666 | 2.20995869174358 |
| 33.4599992521107 | 3.05642051098176 |
| 33.4624992520548 | 2.19806323244214 |
| 33.4649992519990 | 3.09885255491964 |
| 33.4674992519431 | 2.17809224423623 |
| 33.4699992518872 | 3.14042410675883 |
| 33.4724992518313 | 2.17165873454763 |
| 33.4749992517754 | 3.16307428767979 |
| 33.4774992517196 | 2.18775524625608 |
| 33.4799992516637 | 3.17789972252445 |
| 33.4824992516078 | 2.21508339077020 |
| 33.4849992515519 | 3.19648140456112 |
| 33.4874992514960 | 2.24870640830923 |
| 33.4899992514402 | 3.20632788085093 |
| 33.4924992513843 | 2.27834242103399 |
| 33.4949992513284 | 3.19298748920349 |
| 33.4974992512725 | 2.28950175899234 |
| 33.4999992512167 | 3.18213378236271 |
| 33.5024992511608 | 2.28327259339769 |
| 33.5049992511049 | 3.21080863882854 |
| 33.5074992510490 | 2.27914194962622 |
| 33.5099992509931 | 3.23878990815891 |
| 33.5124992509373 | 2.29256257308301 |
| 33.5149992508814 | 3.23021714986810 |
| 33.5174992508255 | 2.29844859852619 |
| 33.5199992507696 | 3.19439447542175 |
| 33.5224992507137 | 2.27290827292832 |
| 33.5249992506579 | 3.17185758180329 |
| 33.5274992506020 | 2.23555152816414 |
| 33.5299992505461 | 3.16157696716227 |
| 33.5324992504902 | 2.22043768791696 |
| 33.5349992504343 | 3.13967351192843 |
| 33.5374992503785 | 2.20465412259202 |
| 33.5399992503226 | 3.11348903526622 |
| 33.5424992502667 | 2.16598460006091 |
| 33.5449992502108 | 3.11032767110380 |
| 33.5474992501549 | 2.11597574384963 |
| 33.5499992500991 | 3.11972325379512 |
| 33.5524992500432 | 2.10304894120631 |

|                  |                  |
|------------------|------------------|
| 33.5549992499873 | 3.09464814659987 |
| 33.5574992499314 | 2.12759669974363 |
| 33.5599992498755 | 3.05286586266839 |
| 33.5624992498197 | 2.15790964110039 |
| 33.5649992497638 | 3.03138805200126 |
| 33.5674992497079 | 2.16307867183189 |
| 33.5699992496520 | 3.05152996894394 |
| 33.5724992495961 | 2.16412849761769 |
| 33.5749992495403 | 3.06735842247967 |
| 33.5774992494844 | 2.17583155217517 |
| 33.5799992494285 | 3.08112193892241 |
| 33.5824992493726 | 2.19144964936774 |
| 33.5849992493168 | 3.08994048607639 |
| 33.5874992492609 | 2.20330263020812 |
| 33.5899992492050 | 3.10448083866820 |
| 33.5924992491491 | 2.21456027690330 |
| 33.5949992490932 | 3.10525765134296 |
| 33.5974992490374 | 2.22594410257446 |
| 33.5999992489815 | 3.09053547843234 |
| 33.6024992489256 | 2.21334994689904 |
| 33.6049992488697 | 3.09802221237938 |
| 33.6074992488138 | 2.18110187147277 |
| 33.6099992487580 | 3.14326876175121 |
| 33.6124992487021 | 2.14715221912304 |
| 33.6149992486462 | 3.18699973657451 |
| 33.6174992485903 | 2.14639387919692 |
| 33.6199992485344 | 3.18136687531916 |
| 33.6224992484786 | 2.16134383785760 |
| 33.6249992484227 | 3.16100997303093 |
| 33.6274992483668 | 2.17172686032613 |
| 33.6299992483109 | 3.15883757643615 |
| 33.6324992482550 | 2.18029440799265 |
| 33.6349992481992 | 3.17270451147865 |
| 33.6374992481433 | 2.20091066024180 |
| 33.6399992480874 | 3.16642768588357 |
| 33.6424992480315 | 2.21074431643757 |
| 33.6449992479756 | 3.16400746415017 |
| 33.6474992479198 | 2.19891388287900 |
| 33.6499992478639 | 3.18604303104164 |
| 33.6524992478080 | 2.19828734193826 |
| 33.6549992477521 | 3.19694411362742 |
| 33.6574992476963 | 2.22742896702656 |
| 33.6599992476404 | 3.15972564676492 |
| 33.6624992475845 | 2.25925727586169 |
| 33.6649992475286 | 3.10188202404846 |
| 33.6674992474727 | 2.25020367800339 |
| 33.6699992474169 | 3.07681761029834 |
| 33.6724992473610 | 2.21153272837528 |
| 33.6749992473051 | 3.08350954304377 |
| 33.6774992472492 | 2.17058277528363 |
| 33.6799992471933 | 3.08594167056913 |
| 33.6824992471375 | 2.15353640322842 |

|                  |                  |
|------------------|------------------|
| 33.6849992470816 | 3.07260826919199 |
| 33.6874992470257 | 2.13496628943550 |
| 33.6899992469698 | 3.05968184487489 |
| 33.6924992469139 | 2.11035809615856 |
| 33.6949992468581 | 3.05184622787109 |
| 33.6974992468022 | 2.10139674966033 |
| 33.6999992467463 | 3.03219239492104 |
| 33.7024992466904 | 2.12425790186667 |
| 33.7049992466345 | 3.00414269387158 |
| 33.7074992465787 | 2.13782305281471 |
| 33.7099992465228 | 3.01266409898083 |
| 33.7124992464669 | 2.13229810975412 |
| 33.7149992464110 | 3.06895854249711 |
| 33.7174992463551 | 2.12972588918762 |
| 33.7199992462993 | 3.11327945042860 |
| 33.7224992462434 | 2.15689910336135 |
| 33.7249992461875 | 3.11359157595372 |
| 33.7274992461316 | 2.19687529414393 |
| 33.7299992460757 | 3.10099785239655 |
| 33.7324992460199 | 2.22859140780113 |
| 33.7349992459640 | 3.10972968639575 |
| 33.7374992459081 | 2.24711838982151 |
| 33.7399992458522 | 3.12502070694468 |
| 33.7424992457964 | 2.25145480271068 |
| 33.7449992457405 | 3.11939605050032 |
| 33.7474992456846 | 2.23178112310885 |
| 33.7499992456287 | 3.12973533185316 |
| 33.7524992455728 | 2.18668959537905 |
| 33.7549992455170 | 3.16884101341626 |
| 33.7574992454611 | 2.15899188915498 |
| 33.7599992454052 | 3.17996467300598 |
| 33.7624992453493 | 2.16359816054461 |
| 33.7649992452934 | 3.13659385985770 |
| 33.7674992452376 | 2.17011208791182 |
| 33.7699992451817 | 3.07793159149875 |
| 33.7724992451258 | 2.13812517278900 |
| 33.7749992450699 | 3.06922961011473 |
| 33.7774992450140 | 2.10499004931164 |
| 33.7799992449582 | 3.07953819012494 |
| 33.7824992449023 | 2.09159159609734 |
| 33.7849992448464 | 3.07851964673737 |
| 33.7874992447905 | 2.10581812751102 |
| 33.7899992447346 | 3.06659213546308 |
| 33.7924992446788 | 2.11476687772766 |
| 33.7949992446229 | 3.06464515336278 |
| 33.7974992445670 | 2.13174183557695 |
| 33.7999992445111 | 3.06147222074217 |
| 33.8024992444552 | 2.16699917905799 |
| 33.8049992443994 | 3.03538520323682 |
| 33.8074992443435 | 2.21114463173669 |
| 33.8099992442876 | 3.00459713286590 |
| 33.8124992442317 | 2.21637766850824 |

|                  |                  |
|------------------|------------------|
| 33.8149992441759 | 3.01070432381710 |
| 33.8174992441200 | 2.18358035658136 |
| 33.8199992440641 | 3.06309752395741 |
| 33.8224992440082 | 2.15486708849270 |
| 33.8249992439523 | 3.08856903960362 |
| 33.8274992438965 | 2.15312090170431 |
| 33.8299992438406 | 3.07313532282976 |
| 33.8324992437847 | 2.15580622035957 |
| 33.8349992437288 | 3.04696060433508 |
| 33.8374992436729 | 2.13478420947200 |
| 33.8399992436171 | 3.06295357285970 |
| 33.8424992435612 | 2.11119364288049 |
| 33.8449992435053 | 3.07719015375602 |
| 33.8474992434494 | 2.10495928982534 |
| 33.8499992433935 | 3.07040183271473 |
| 33.8524992433377 | 2.11164203487286 |
| 33.8549992432818 | 3.08297195644025 |
| 33.8574992432259 | 2.10781949290422 |
| 33.8599992431700 | 3.13247267845356 |
| 33.8624992431141 | 2.12221176666444 |
| 33.8649992430583 | 3.16160913388626 |
| 33.8674992430024 | 2.16884531641171 |
| 33.8699992429465 | 3.13144121513226 |
| 33.8724992428906 | 2.21899467375048 |
| 33.8749992428347 | 3.09638320624741 |
| 33.8774992427789 | 2.23484647907949 |
| 33.8799992427230 | 3.10629656288336 |
| 33.8824992426671 | 2.23325535551737 |
| 33.8849992426112 | 3.13427930137743 |
| 33.8874992425554 | 2.21975272135749 |
| 33.8899992424995 | 3.13064360221553 |
| 33.8924992424436 | 2.19838131547623 |
| 33.8949992423877 | 3.11388594113689 |
| 33.8974992423318 | 2.15842149788150 |
| 33.8999992422760 | 3.10267113735455 |
| 33.9024992422201 | 2.13025961474136 |
| 33.9049992421642 | 3.08774240791326 |
| 33.9074992421083 | 2.12474389521208 |
| 33.9099992420524 | 3.05023653835059 |
| 33.9124992419966 | 2.12503838758786 |
| 33.9149992419407 | 3.00485312102372 |
| 33.9174992418848 | 2.08757148995238 |
| 33.9199992418289 | 3.00594925727448 |
| 33.9224992417730 | 2.04810792451130 |
| 33.9249992417172 | 3.04922836111876 |
| 33.9274992416613 | 2.06551638133543 |
| 33.9299992416054 | 3.06320767897983 |
| 33.9324992415495 | 2.13371925805763 |
| 33.9349992414936 | 3.04204198348100 |
| 33.9374992414378 | 2.18961571686129 |
| 33.9399992413819 | 3.02964862549702 |
| 33.9424992413260 | 2.20671429253653 |



|                  |                  |
|------------------|------------------|
| 33.9449992412701 | 3.05625351467806 |
| 33.9474992412142 | 2.21820493025194 |
| 33.9499992411584 | 3.07529600134833 |
| 33.9524992411025 | 2.23492015896698 |
| 33.9549992410466 | 3.07969530259959 |
| 33.9574992409907 | 2.24272577716002 |
| 33.9599992409348 | 3.09729869721165 |
| 33.9624992408790 | 2.21104620625101 |
| 33.9649992408231 | 3.13900017523813 |
| 33.9674992407672 | 2.16989881508378 |
| 33.9699992407113 | 3.15502610050202 |
| 33.9724992406555 | 2.14665968702447 |
| 33.9749992405996 | 3.12133749145555 |
| 33.9774992405437 | 2.13969549892970 |
| 33.9799992404878 | 3.09003687098164 |
| 33.9824992404319 | 2.11730614710013 |
| 33.9849992403761 | 3.10405588063827 |
| 33.9874992403202 | 2.09462418024237 |
| 33.9899992402643 | 3.13331997216291 |
| 33.9924992402084 | 2.09002720945422 |
| 33.9949992401525 | 3.12634780351835 |
| 33.9974992400967 | 2.10691451509310 |
| 33.9999992400408 | 3.11619079078432 |
| 34.0024992399849 | 2.13330933527231 |
| 34.0049992399290 | 3.11586768179234 |
| 34.0074992398731 | 2.17902497277888 |
| 34.0099992398173 | 3.11963639735338 |
| 34.0124992397614 | 2.23364930456350 |
| 34.0149992397055 | 3.09067231313415 |
| 34.0174992396496 | 2.27005532886183 |
| 34.0199992395937 | 3.05586236055258 |
| 34.0224992395379 | 2.25950262537953 |
| 34.0249992394820 | 3.06752278205134 |
| 34.0274992394261 | 2.22479335860996 |
| 34.0299992393702 | 3.10439409005139 |
| 34.0324992393143 | 2.20248713864327 |
| 34.0349992392585 | 3.10471846571585 |
| 34.0374992392026 | 2.19878464114519 |
| 34.0399992391467 | 3.06588157505880 |
| 34.0424992390908 | 2.17533145343738 |
| 34.0449992390350 | 3.04204224210184 |
| 34.0474992389791 | 2.12569634113742 |
| 34.0499992389232 | 3.05610440851634 |
| 34.0524992388673 | 2.08802764223537 |
| 34.0549992388114 | 3.07404652903530 |
| 34.0574992387556 | 2.08325336250971 |
| 34.0599992386997 | 3.07505048477029 |
| 34.0624992386438 | 2.09315560810633 |
| 34.0649992385879 | 3.09191103977492 |
| 34.0674992385320 | 2.09937421665981 |
| 34.0699992384762 | 3.13629407005561 |
| 34.0724992384203 | 2.13797460778513 |

|                  |                  |
|------------------|------------------|
| 34.0749992383644 | 3.15928688278478 |
| 34.0774992383085 | 2.20808296748582 |
| 34.0799992382526 | 3.14856760531468 |
| 34.0824992381968 | 2.27552564169315 |
| 34.0849992381409 | 3.13833311807940 |
| 34.0874992380850 | 2.30164455896691 |
| 34.0899992380291 | 3.17311528913684 |
| 34.0924992379732 | 2.31880165529461 |
| 34.0949992379174 | 3.21026259789242 |
| 34.0974992378615 | 2.34358975937791 |
| 34.0999992378056 | 3.21630629895693 |
| 34.1024992377497 | 2.36728630248962 |
| 34.1049992376938 | 3.20209423766338 |
| 34.1074992376380 | 2.36019495212768 |
| 34.1099992375821 | 3.19920781047981 |
| 34.1124992375262 | 2.32801126601784 |
| 34.1149992374703 | 3.20690952761845 |
| 34.1174992374144 | 2.29547687329605 |
| 34.1199992373586 | 3.18317182625962 |
| 34.1224992373027 | 2.27180983230397 |
| 34.1249992372468 | 3.14674687335763 |
| 34.1274992371909 | 2.23338898587796 |
| 34.1299992371351 | 3.14436216650865 |
| 34.1324992370792 | 2.17552208860149 |
| 34.1349992370233 | 3.17344115056353 |
| 34.1374992369674 | 2.13184774691862 |
| 34.1399992369115 | 3.16357594291239 |
| 34.1424992368557 | 2.11998061292881 |
| 34.1449992367998 | 3.11915360411779 |
| 34.1474992367439 | 2.12389368218492 |
| 34.1499992366880 | 3.08629844398917 |
| 34.1524992366321 | 2.13667459899864 |
| 34.1549992365763 | 3.09427186745008 |
| 34.1574992365204 | 2.17269070684831 |
| 34.1599992364645 | 3.09321256802665 |
| 34.1624992364086 | 2.21444408562352 |
| 34.1649992363527 | 3.07796831184095 |
| 34.1674992362969 | 2.24050324294298 |
| 34.1699992362410 | 3.09229507101845 |
| 34.1724992361851 | 2.25578208880845 |
| 34.1749992361292 | 3.13395504528623 |
| 34.1774992360733 | 2.29924326423065 |
| 34.1799992360175 | 3.14376704235635 |
| 34.1824992359616 | 2.36445063743610 |
| 34.1849992359057 | 3.11361568741825 |
| 34.1874992358498 | 2.41609944063091 |
| 34.1899992357939 | 3.09710216379408 |
| 34.1924992357381 | 2.42568861913437 |
| 34.1949992356822 | 3.13179133737993 |
| 34.1974992356263 | 2.42477211138820 |
| 34.1999992355704 | 3.18501957108335 |
| 34.2024992355146 | 2.43500851075412 |

|                  |                  |
|------------------|------------------|
| 34.2049992354587 | 3.21765672267148 |
| 34.2074992354028 | 2.46248177115913 |
| 34.2099992353469 | 3.24606746548035 |
| 34.2124992352910 | 2.48439675949777 |
| 34.2149992352352 | 3.27774627355032 |
| 34.2174992351793 | 2.49954704592012 |
| 34.2199992351234 | 3.31133301487014 |
| 34.2224992350675 | 2.51226458100535 |
| 34.2249992350116 | 3.32067946892530 |
| 34.2274992349558 | 2.51598641765769 |
| 34.2299992348999 | 3.33442500461684 |
| 34.2324992348440 | 2.50345047036166 |
| 34.2349992347881 | 3.37256776161992 |
| 34.2374992347322 | 2.50152339648663 |
| 34.2399992346764 | 3.42102404826917 |
| 34.2424992346205 | 2.53753232554267 |
| 34.2449992345646 | 3.43737051595446 |
| 34.2474992345087 | 2.58714333261862 |
| 34.2499992344528 | 3.43873306015588 |
| 34.2524992343970 | 2.61614133055135 |
| 34.2549992343411 | 3.45971302628209 |
| 34.2574992342852 | 2.62087583021020 |
| 34.2599992342293 | 3.49468434473187 |
| 34.2624992341734 | 2.62687652594978 |
| 34.2649992341176 | 3.51685185430180 |
| 34.2674992340617 | 2.65780838543056 |
| 34.2699992340058 | 3.50649315755072 |
| 34.2724992339499 | 2.71268663811101 |
| 34.2749992338941 | 3.50208190351240 |
| 34.2774992338382 | 2.76778591567664 |
| 34.2799992337823 | 3.51003592187901 |
| 34.2824992337264 | 2.82205155845229 |
| 34.2849992336705 | 3.53062798308941 |
| 34.2874992336147 | 2.86677040869704 |
| 34.2899992335588 | 3.53937102013465 |
| 34.2924992335029 | 2.90430569506758 |
| 34.2949992334470 | 3.56765577637599 |
| 34.2974992333911 | 2.93931883513136 |
| 34.2999992333353 | 3.59729292928127 |
| 34.3024992332794 | 2.98921267056678 |
| 34.3049992332235 | 3.60896655307264 |
| 34.3074992331676 | 3.05161418672512 |
| 34.3099992331117 | 3.59804502558501 |
| 34.3124992330559 | 3.11534930883473 |
| 34.3149992330000 | 3.58514672481350 |
| 34.3174992329441 | 3.16081654113079 |
| 34.3199992328882 | 3.60593761754318 |
| 34.3224992328323 | 3.20278448714302 |
| 34.3249992327765 | 3.64542604543612 |
| 34.3274992327206 | 3.25017417364762 |
| 34.3299992326647 | 3.69464507066931 |
| 34.3324992326088 | 3.31974221568995 |

|                  |                  |
|------------------|------------------|
| 34.3349992325529 | 3.72481999685394 |
| 34.3374992324971 | 3.40372193937240 |
| 34.3399992324412 | 3.75435638650062 |
| 34.3424992323853 | 3.48744843177673 |
| 34.3449992323294 | 3.77714375077333 |
| 34.3474992322735 | 3.56195068179867 |
| 34.3499992322177 | 3.80042280292206 |
| 34.3524992321618 | 3.62109841706905 |
| 34.3549992321059 | 3.83016088769467 |
| 34.3574992320500 | 3.66081785383772 |
| 34.3599992319942 | 3.87789080494036 |
| 34.3624992319383 | 3.69151483893929 |
| 34.3649992318824 | 3.94260875437812 |
| 34.3674992318265 | 3.73631600923650 |
| 34.3699992317706 | 3.99092035178679 |
| 34.3724992317148 | 3.80742309074812 |
| 34.3749992316589 | 4.02194684985878 |
| 34.3774992316030 | 3.90189147359624 |
| 34.3799992315471 | 4.04194735629164 |
| 34.3824992314912 | 3.98761710021474 |
| 34.3849992314354 | 4.08891675982454 |
| 34.3874992313795 | 4.05318897969031 |
| 34.3899992313236 | 4.14659674223200 |
| 34.3924992312677 | 4.09673240570262 |
| 34.3949992312118 | 4.21899351392734 |
| 34.3974992311560 | 4.14185911549693 |
| 34.3999992311001 | 4.28877971021327 |
| 34.4024992310442 | 4.19820700555868 |
| 34.4049992309883 | 4.33637060072810 |
| 34.4074992309324 | 4.27624009313100 |
| 34.4099992308766 | 4.36355796000890 |
| 34.4124992308207 | 4.35179031738157 |
| 34.4149992307648 | 4.37676435396561 |
| 34.4174992307089 | 4.41736156553411 |
| 34.4199992306530 | 4.41279351393525 |
| 34.4224992305972 | 4.45925972023541 |
| 34.4249992305413 | 4.47350946372834 |
| 34.4274992304854 | 4.50112093408831 |
| 34.4299992304295 | 4.55682143743608 |
| 34.4324992303737 | 4.54914974782420 |
| 34.4349992303178 | 4.61589797254976 |
| 34.4374992302619 | 4.62563539660315 |
| 34.4399992302060 | 4.66036747970747 |
| 34.4424992301501 | 4.71084827602641 |
| 34.4449992300943 | 4.68671637206872 |
| 34.4474992300384 | 4.79089765670109 |
| 34.4499992299825 | 4.71799763218031 |
| 34.4524992299266 | 4.84571775651513 |
| 34.4549992298707 | 4.75720125828223 |
| 34.4574992298149 | 4.88088708576976 |
| 34.4599992297590 | 4.81005749721830 |
| 34.4624992297031 | 4.90212395384909 |

|                  |                  |
|------------------|------------------|
| 34.4649992296472 | 4.87894569112324 |
| 34.4674992295913 | 4.93766976275864 |
| 34.4699992295355 | 4.93577198161453 |
| 34.4724992294796 | 4.99048157208069 |
| 34.4749992294237 | 4.97283622794005 |
| 34.4774992293678 | 5.06427335148578 |
| 34.4799992293119 | 4.98415663149564 |
| 34.4824992292561 | 5.14312735844340 |
| 34.4849992292002 | 5.01341570256457 |
| 34.4874992291443 | 5.20521798150404 |
| 34.4899992290884 | 5.06018369964540 |
| 34.4924992290325 | 5.24255220672565 |
| 34.4949992289767 | 5.13261240422516 |
| 34.4974992289208 | 5.26840595127046 |
| 34.4999992288649 | 5.20323182650427 |
| 34.5024992288090 | 5.30779048724994 |
| 34.5049992287531 | 5.25355763577416 |
| 34.5074992286973 | 5.36755005117735 |
| 34.5099992286414 | 5.27559543776463 |
| 34.5124992285855 | 5.43678743313126 |
| 34.5149992285296 | 5.28597967806101 |
| 34.5174992284738 | 5.49182599248346 |
| 34.5199992284179 | 5.30714533620373 |
| 34.5224992283620 | 5.53778883667380 |
| 34.5249992283061 | 5.35364475789887 |
| 34.5274992282502 | 5.57732131988278 |
| 34.5299992281944 | 5.42670817630292 |
| 34.5324992281385 | 5.62631382283827 |
| 34.5349992280826 | 5.48796650074014 |
| 34.5374992280267 | 5.68070036875498 |
| 34.5399992279708 | 5.53836197064231 |
| 34.5424992279150 | 5.75052490426300 |
| 34.5449992278591 | 5.56595732766161 |
| 34.5474992278032 | 5.81669396096047 |
| 34.5499992277473 | 5.58969608073596 |
| 34.5524992276914 | 5.87213086314440 |
| 34.5549992276356 | 5.61846032671114 |
| 34.5574992275797 | 5.90467719518527 |
| 34.5599992275238 | 5.66640207219034 |
| 34.5624992274679 | 5.94132961414505 |
| 34.5649992274120 | 5.72701778310710 |
| 34.5674992273562 | 5.99052626177050 |
| 34.5699992273003 | 5.78215713039251 |
| 34.5724992272444 | 6.05836266632182 |
| 34.5749992271885 | 5.82172173831883 |
| 34.5774992271326 | 6.12104173005119 |
| 34.5799992270768 | 5.84668413110295 |
| 34.5824992270209 | 6.18376140000566 |
| 34.5849992269650 | 5.87549990478436 |
| 34.5874992269091 | 6.23545912715952 |
| 34.5899992268533 | 5.91135212305586 |
| 34.5924992267974 | 6.27963112219269 |

|                  |                  |
|------------------|------------------|
| 34.5949992267415 | 5.96628593047542 |
| 34.5974992266856 | 6.31275999850303 |
| 34.5999992266297 | 6.02638998726676 |
| 34.6024992265739 | 6.36171420823641 |
| 34.6049992265180 | 6.07843467433854 |
| 34.6074992264621 | 6.43192292686169 |
| 34.6099992264062 | 6.10728638506612 |
| 34.6124992263503 | 6.51102884260829 |
| 34.6149992262945 | 6.12711000025918 |
| 34.6174992262386 | 6.56977994271247 |
| 34.6199992261827 | 6.15056277207777 |
| 34.6224992261268 | 6.60864255800736 |
| 34.6249992260709 | 6.18756502427126 |
| 34.6274992260151 | 6.64787505381750 |
| 34.6299992259592 | 6.22973503078558 |
| 34.6324992259033 | 6.69502592273622 |
| 34.6349992258474 | 6.27054342707384 |
| 34.6374992257915 | 6.74614915558817 |
| 34.6399992257357 | 6.31651434324224 |
| 34.6424992256798 | 6.80049048055014 |
| 34.6449992256239 | 6.36125893386411 |
| 34.6474992255680 | 6.86715879011313 |
| 34.6499992255121 | 6.38999806880386 |
| 34.6524992254563 | 6.92927815137955 |
| 34.6549992254004 | 6.41026263224027 |
| 34.6574992253445 | 6.97816541105010 |
| 34.6599992252886 | 6.43477017495147 |
| 34.6624992252328 | 7.01421342747710 |
| 34.6649992251769 | 6.46869629914421 |
| 34.6674992251210 | 7.05812597387763 |
| 34.6699992250651 | 6.50386987496690 |
| 34.6724992250092 | 7.10131390582067 |
| 34.6749992249534 | 6.54056803239206 |
| 34.6774992248975 | 7.14482252756848 |
| 34.6799992248416 | 6.58345379822240 |
| 34.6824992247857 | 7.18788586488774 |
| 34.6849992247298 | 6.62461977755426 |
| 34.6874992246740 | 7.25110156624868 |
| 34.6899992246181 | 6.65424048059987 |
| 34.6924992245622 | 7.31665132728197 |
| 34.6949992245063 | 6.66359601125496 |
| 34.6974992244504 | 7.37012122767407 |
| 34.6999992243946 | 6.67718310505059 |
| 34.7024992243387 | 7.39845959301705 |
| 34.7049992242828 | 6.70472065960275 |
| 34.7074992242269 | 7.42800861890406 |
| 34.7099992241710 | 6.74465202160111 |
| 34.7124992241152 | 7.46570042737880 |
| 34.7149992240593 | 6.78557795365855 |
| 34.7174992240034 | 7.51331449442149 |
| 34.7199992239475 | 6.83026784812931 |
| 34.7224992238916 | 7.55672746211818 |



|                  |                  |
|------------------|------------------|
| 34.7249992238358 | 6.87211570720386 |
| 34.7274992237799 | 7.61149401137681 |
| 34.7299992237240 | 6.89042474709571 |
| 34.7324992236681 | 7.66937043736720 |
| 34.7349992236122 | 6.89779595643311 |
| 34.7374992235564 | 7.71607421548717 |
| 34.7399992235005 | 6.90691315897558 |
| 34.7424992234446 | 7.74182604785957 |
| 34.7449992233887 | 6.94191232458153 |
| 34.7474992233329 | 7.76607179677152 |
| 34.7499992232770 | 6.98296072243672 |
| 34.7524992232211 | 7.79773912663004 |
| 34.7549992231652 | 7.02528682281613 |
| 34.7574992231093 | 7.84601160871822 |
| 34.7599992230535 | 7.05666506154182 |
| 34.7624992229976 | 7.89959192244093 |
| 34.7649992229417 | 7.08795718279738 |
| 34.7674992228858 | 7.95166698549738 |
| 34.7699992228299 | 7.11415110130464 |
| 34.7724992227741 | 7.99676518647140 |
| 34.7749992227182 | 7.13073204924249 |
| 34.7774992226623 | 8.03593234534824 |
| 34.7799992226064 | 7.14835692355509 |
| 34.7824992225505 | 8.07033691071569 |
| 34.7849992224947 | 7.17132917305523 |
| 34.7874992224388 | 8.10639018848038 |
| 34.7899992223829 | 7.21131273523427 |
| 34.7924992223270 | 8.15206249299851 |
| 34.7949992222711 | 7.23840569557420 |
| 34.7974992222153 | 8.19610162463534 |
| 34.7999992221594 | 7.26849407769980 |
| 34.8024992221035 | 8.22734526941097 |
| 34.8049992220476 | 7.29725434039886 |
| 34.8074992219917 | 8.24896817616907 |
| 34.8099992219359 | 7.33890965824236 |
| 34.8124992218800 | 8.28838102150076 |
| 34.8149992218241 | 7.37022539821802 |
| 34.8174992217682 | 8.34459426319255 |
| 34.8199992217124 | 7.38855932739814 |
| 34.8224992216565 | 8.40676428500514 |
| 34.8249992216006 | 7.40805371480830 |
| 34.8274992215447 | 8.44919737445800 |
| 34.8299992214888 | 7.43596897803588 |
| 34.8324992214330 | 8.47600335346530 |
| 34.8349992213771 | 7.48265747115141 |
| 34.8374992213212 | 8.50247341550804 |
| 34.8399992212653 | 7.51601914212238 |
| 34.8424992212094 | 8.53647008147150 |
| 34.8449992211536 | 7.55508180328962 |
| 34.8474992210977 | 8.56285118832209 |
| 34.8499992210418 | 7.58649107886367 |
| 34.8524992209859 | 8.60282456045676 |

|                  |                  |
|------------------|------------------|
| 34.8549992209300 | 7.62077143500295 |
| 34.8574992208742 | 8.66042878954027 |
| 34.8599992208183 | 7.63762344638193 |
| 34.8624992207624 | 8.72872826185888 |
| 34.8649992207065 | 7.66305340642860 |
| 34.8674992206506 | 8.76805517580404 |
| 34.8699992205948 | 7.71568837354555 |
| 34.8724992205389 | 8.78666495425198 |
| 34.8749992204830 | 7.77466471397925 |
| 34.8774992204271 | 8.81339877960081 |
| 34.8799992203712 | 7.82019128950443 |
| 34.8824992203154 | 8.86349933346063 |
| 34.8849992202595 | 7.83761275588671 |
| 34.8874992202036 | 8.91371557618931 |
| 34.8899992201477 | 7.87197793101486 |
| 34.8924992200918 | 8.95444612591248 |
| 34.8949992200360 | 7.90371578275238 |
| 34.8974992199801 | 8.98674216196031 |
| 34.8999992199242 | 7.94885929439061 |
| 34.9024992198683 | 9.02128500205980 |
| 34.9049992198125 | 7.98339775997495 |
| 34.9074992197566 | 9.04832220278677 |
| 34.9099992197007 | 8.03426854616274 |
| 34.9124992196448 | 9.07829527026275 |
| 34.9149992195889 | 8.08995351781436 |
| 34.9174992195331 | 9.13020693213478 |
| 34.9199992194772 | 8.13247627291350 |
| 34.9224992194213 | 9.20120287985897 |
| 34.9249992193654 | 8.15741327716121 |
| 34.9274992193095 | 9.25217607322326 |
| 34.9299992192537 | 8.18864137999595 |
| 34.9324992191978 | 9.26453448924586 |
| 34.9349992191419 | 8.25329925347221 |
| 34.9374992190860 | 9.27585045953604 |
| 34.9399992190301 | 8.30745379262533 |
| 34.9424992189743 | 9.31156898255547 |
| 34.9449992189184 | 8.34735049790249 |
| 34.9474992188625 | 9.35329462918832 |
| 34.9499992188066 | 8.37497799116893 |
| 34.9524992187507 | 9.38366930416295 |
| 34.9549992186949 | 8.42281051337919 |
| 34.9574992186390 | 9.43172577939213 |
| 34.9599992185831 | 8.46366991783659 |
| 34.9624992185272 | 9.49833676591313 |
| 34.9649992184713 | 8.50026589917104 |
| 34.9674992184155 | 9.55304156144947 |
| 34.9699992183596 | 8.54692274552338 |
| 34.9724992183037 | 9.57048650179269 |
| 34.9749992182478 | 8.60840558174782 |
| 34.9774992181920 | 9.58111620357884 |
| 34.9799992181361 | 8.66523118535195 |
| 34.9824992180802 | 9.61024106751303 |

|                  |                  |
|------------------|------------------|
| 34.9849992180243 | 8.69307003427949 |
| 34.9874992179684 | 9.65670985696811 |
| 34.9899992179126 | 8.72383052974644 |
| 34.9924992178567 | 9.68761297877367 |
| 34.9949992178008 | 8.76910968555263 |
| 34.9974992177449 | 9.71967106027385 |
| 34.9999992176890 | 8.82700595782681 |
| 35.0024992176332 | 9.76356399183725 |
| 35.0049992175773 | 8.86504560130370 |
| 35.0074992175214 | 9.81541774926615 |
| 35.0099992174655 | 8.90015101044303 |
| 35.0124992174096 | 9.84343869743795 |
| 35.0149992173538 | 8.94938869654129 |
| 35.0174992172979 | 9.86419105998307 |
| 35.0199992172420 | 9.00201853071299 |
| 35.0224992171861 | 9.89363273172574 |
| 35.0249992171302 | 9.03809068497589 |
| 35.0274992170744 | 9.93019940924305 |
| 35.0299992170185 | 9.06657410294572 |
| 35.0324992169626 | 9.94876977933217 |
| 35.0349992169067 | 9.11820030229135 |
| 35.0374992168508 | 9.97451914605015 |
| 35.0399992167950 | 9.17400242305778 |
| 35.0424992167391 | 10.0255153708343 |
| 35.0449992166832 | 9.21583834723440 |
| 35.0474992166273 | 10.0782745455278 |
| 35.0499992165715 | 9.24406558989988 |
| 35.0524992165156 | 10.1035022919927 |
| 35.0549992164597 | 9.29015022069493 |
| 35.0574992164038 | 10.1127211739736 |
| 35.0599992163479 | 9.34049609040874 |
| 35.0624992162921 | 10.1390160237490 |
| 35.0649992162362 | 9.37937742494319 |
| 35.0674992161803 | 10.1779625949187 |
| 35.0699992161244 | 9.40966393517547 |
| 35.0724992160685 | 10.2082067295811 |
| 35.0749992160127 | 9.45481501637568 |
| 35.0774992159568 | 10.2239011762214 |
| 35.0799992159009 | 9.51587457073106 |
| 35.0824992158450 | 10.2566631291695 |
| 35.0849992157891 | 9.56844388764202 |
| 35.0874992157333 | 10.2988430107365 |
| 35.0899992156774 | 9.60849727335263 |
| 35.0924992156215 | 10.3382946723278 |
| 35.0949992155656 | 9.64467239423818 |
| 35.0974992155097 | 10.3583572613706 |
| 35.0999992154539 | 9.68869570493867 |
| 35.1024992153980 | 10.3905762205551 |
| 35.1049992153421 | 9.72121557687607 |
| 35.1074992152862 | 10.4251983912015 |
| 35.1099992152303 | 9.75520065662890 |
| 35.1124992151745 | 10.4565484937708 |

|                  |                  |
|------------------|------------------|
| 35.1149992151186 | 9.80699067881738 |
| 35.1174992150627 | 10.4635743862461 |
| 35.1199992150068 | 9.87879788173328 |
| 35.1224992149509 | 10.4867056261310 |
| 35.1249992148951 | 9.93448834706786 |
| 35.1274992148392 | 10.5222656337230 |
| 35.1299992147833 | 9.96365808437739 |
| 35.1324992147274 | 10.5743805897154 |
| 35.1349992146716 | 9.98271527734804 |
| 35.1374992146157 | 10.6108858069514 |
| 35.1399992145598 | 10.0186665162069 |
| 35.1424992145039 | 10.6432533133636 |
| 35.1449992144480 | 10.0679038793327 |
| 35.1474992143922 | 10.6602754206939 |
| 35.1499992143363 | 10.1294532482802 |
| 35.1524992142804 | 10.6760620864647 |
| 35.1549992142245 | 10.1909514178552 |
| 35.1574992141686 | 10.6863530982978 |
| 35.1599992141128 | 10.2446542770302 |
| 35.1624992140569 | 10.7202005587695 |
| 35.1649992140010 | 10.2790374137615 |
| 35.1674992139451 | 10.7661420267246 |
| 35.1699992138892 | 10.2917981768484 |
| 35.1724992138334 | 10.8109763935490 |
| 35.1749992137775 | 10.3171032406415 |
| 35.1774992137216 | 10.8287121984287 |
| 35.1799992136657 | 10.3672508879985 |
| 35.1824992136098 | 10.8359602294011 |
| 35.1849992135540 | 10.4423114140009 |
| 35.1874992134981 | 10.8539605377792 |
| 35.1899992134422 | 10.5015573166597 |
| 35.1924992133863 | 10.8894781977976 |
| 35.1949992133304 | 10.5471450590130 |
| 35.1974992132746 | 10.9339274789048 |
| 35.1999992132187 | 10.5722077169709 |
| 35.2024992131628 | 10.9731036932340 |
| 35.2049992131069 | 10.5996102439850 |
| 35.2074992130511 | 11.0046972920571 |
| 35.2099992129952 | 10.6318148543504 |
| 35.2124992129393 | 11.0179116195986 |
| 35.2149992128834 | 10.6875897453889 |
| 35.2174992128275 | 11.0223827670981 |
| 35.2199992127717 | 10.7535217080094 |
| 35.2224992127158 | 11.0314267468822 |
| 35.2249992126599 | 10.8097741061095 |
| 35.2274992126040 | 11.0700869198964 |
| 35.2299992125481 | 10.8414813000923 |
| 35.2324992124923 | 11.1223438873704 |
| 35.2349992124364 | 10.8568789041992 |
| 35.2374992123805 | 11.1766982905873 |
| 35.2399992123246 | 10.8890943432037 |
| 35.2424992122687 | 11.2027611004138 |

|                  |                  |
|------------------|------------------|
| 35.2449992122129 | 10.9375587186865 |
| 35.2474992121570 | 11.2145704267319 |
| 35.2499992121011 | 11.0130642808603 |
| 35.2524992120452 | 11.2162899132248 |
| 35.2549992119893 | 11.0769180377753 |
| 35.2574992119335 | 11.2342281883791 |
| 35.2599992118776 | 11.1295990890158 |
| 35.2624992118217 | 11.2622955875488 |
| 35.2649992117658 | 11.1511371626444 |
| 35.2674992117099 | 11.3097438454700 |
| 35.2699992116541 | 11.1660153855999 |
| 35.2724992115982 | 11.3501519976083 |
| 35.2749992115423 | 11.1873246003515 |
| 35.2774992114864 | 11.3848717514088 |
| 35.2799992114305 | 11.2400783571622 |
| 35.2824992113747 | 11.4009672069820 |
| 35.2849992113188 | 11.3101512909687 |
| 35.2874992112629 | 11.4184008020297 |
| 35.2899992112070 | 11.3789060289037 |
| 35.2924992111512 | 11.4384874315314 |
| 35.2949992110953 | 11.4344013055821 |
| 35.2974992110394 | 11.4691404955908 |
| 35.2999992109835 | 11.4635642675064 |
| 35.3024992109276 | 11.4975997946107 |
| 35.3049992108718 | 11.4843792596478 |
| 35.3074992108159 | 11.5255691961835 |
| 35.3099992107600 | 11.5029393820071 |
| 35.3124992107041 | 11.5467163738630 |
| 35.3149992106482 | 11.5475321718811 |
| 35.3174992105924 | 11.5705955235467 |
| 35.3199992105365 | 11.6017366689613 |
| 35.3224992104806 | 11.5972690168961 |
| 35.3249992104247 | 11.6625047875907 |
| 35.3274992103688 | 11.6251978836477 |
| 35.3299992103130 | 11.7090188381462 |
| 35.3324992102571 | 11.6484245345868 |
| 35.3349992102012 | 11.7488444266475 |
| 35.3374992101453 | 11.6626118021442 |
| 35.3399992100894 | 11.7825250203792 |
| 35.3424992100336 | 11.6727649072502 |
| 35.3449992099777 | 11.8127636207438 |
| 35.3474992099218 | 11.6864223140605 |
| 35.3499992098659 | 11.8490800010939 |
| 35.3524992098100 | 11.7108926992216 |
| 35.3549992097542 | 11.8907867470965 |
| 35.3574992096983 | 11.7428098662303 |
| 35.3599992096424 | 11.9416823084875 |
| 35.3624992095865 | 11.7805171732439 |
| 35.3649992095307 | 11.9831781468174 |
| 35.3674992094748 | 11.8108596688446 |
| 35.3699992094189 | 12.0179688429462 |
| 35.3724992093630 | 11.8256492136881 |

|                  |                  |
|------------------|------------------|
| 35.3749992093071 | 12.0486278378519 |
| 35.3774992092513 | 11.8283662775267 |
| 35.3799992091954 | 12.0873493176479 |
| 35.3824992091395 | 11.8338665631076 |
| 35.3849992090836 | 12.1257018871355 |
| 35.3874992090277 | 11.8523346302819 |
| 35.3899992089719 | 12.1617194586091 |
| 35.3924992089160 | 11.8844994168473 |
| 35.3949992088601 | 12.2054545158088 |
| 35.3974992088042 | 11.9199688086126 |
| 35.3999992087483 | 12.2555720794061 |
| 35.4024992086925 | 11.9535872545778 |
| 35.4049992086366 | 12.3027144788368 |
| 35.4074992085807 | 11.9861261830543 |
| 35.4099992085248 | 12.3301187733905 |
| 35.4124992084689 | 12.0035190397939 |
| 35.4149992084131 | 12.3532081876923 |
| 35.4174992083572 | 12.0083094522734 |
| 35.4199992083013 | 12.3859622767492 |
| 35.4224992082454 | 12.0127165138219 |
| 35.4249992081895 | 12.4337613770346 |
| 35.4274992081337 | 12.0344872217674 |
| 35.4299992080778 | 12.4805331744740 |
| 35.4324992080219 | 12.0698348832930 |
| 35.4349992079660 | 12.5260716413629 |
| 35.4374992079102 | 12.1090356295487 |
| 35.4399992078543 | 12.5756552728034 |
| 35.4424992077984 | 12.1433779951097 |
| 35.4449992077425 | 12.6168037817721 |
| 35.4474992076866 | 12.1816387130790 |
| 35.4499992076308 | 12.6411363616497 |
| 35.4524992075749 | 12.2102558173821 |
| 35.4549992075190 | 12.6600739180694 |
| 35.4574992074631 | 12.2217624907226 |
| 35.4599992074072 | 12.7073923316580 |
| 35.4624992073514 | 12.2241844392718 |
| 35.4649992072955 | 12.7707706016385 |
| 35.4674992072396 | 12.2435450638688 |
| 35.4699992071837 | 12.8321340040083 |
| 35.4724992071278 | 12.2864802319428 |
| 35.4749992070720 | 12.8741244993779 |
| 35.4774992070161 | 12.3330337830925 |
| 35.4799992069602 | 12.9178102957254 |
| 35.4824992069043 | 12.3711293152597 |
| 35.4849992068484 | 12.9627881096528 |
| 35.4874992067926 | 12.4004173889517 |
| 35.4899992067367 | 12.9983370047438 |
| 35.4924992066808 | 12.4285398312614 |
| 35.4949992066249 | 13.0291409980340 |
| 35.4974992065690 | 12.4427341506814 |
| 35.4999992065132 | 13.0808293372452 |
| 35.5024992064573 | 12.4622301069689 |



|                  |                  |
|------------------|------------------|
| 35.5049992064014 | 13.1486409735749 |
| 35.5074992063455 | 12.4935581502754 |
| 35.5099992062896 | 13.2029955142424 |
| 35.5124992062338 | 12.5430917793523 |
| 35.5149992061779 | 13.2429653597524 |
| 35.5174992061220 | 12.5783082710636 |
| 35.5199992060661 | 13.2849141371206 |
| 35.5224992060103 | 12.6067376926836 |
| 35.5249992059544 | 13.3415723419241 |
| 35.5274992058985 | 12.6293041855887 |
| 35.5299992058426 | 13.3837501358630 |
| 35.5324992057867 | 12.6707972560073 |
| 35.5349992057309 | 13.4138431524386 |
| 35.5374992056750 | 12.6991659997878 |
| 35.5399992056191 | 13.4468703213562 |
| 35.5424992055632 | 12.7229701566343 |
| 35.5449992055073 | 13.5079260270714 |
| 35.5474992054515 | 12.7426001956655 |
| 35.5499992053956 | 13.5691420737304 |
| 35.5524992053397 | 12.7844156831124 |
| 35.5549992052838 | 13.6159237378179 |
| 35.5574992052279 | 12.8168771061772 |
| 35.5599992051721 | 13.6588957488430 |
| 35.5624992051162 | 12.8417799211612 |
| 35.5649992050603 | 13.7106818143929 |
| 35.5674992050044 | 12.8643060740319 |
| 35.5699992049485 | 13.7485742336663 |
| 35.5724992048927 | 12.9119330569427 |
| 35.5749992048368 | 13.7643361924848 |
| 35.5774992047809 | 12.9530705432679 |
| 35.5799992047250 | 13.7930335936378 |
| 35.5824992046691 | 12.9730279539914 |
| 35.5849992046133 | 13.8505798133805 |
| 35.5874992045574 | 12.9755097669992 |
| 35.5899992045015 | 13.9227447771785 |
| 35.5924992044456 | 12.9959393141967 |
| 35.5949992043898 | 13.9691430169938 |
| 35.5974992043339 | 13.0355075740942 |
| 35.5999992042780 | 14.0000727719503 |
| 35.6024992042221 | 13.0777389900519 |
| 35.6049992041662 | 14.0281931364132 |
| 35.6074992041104 | 13.1115024815411 |
| 35.6099992040545 | 14.0690424146123 |
| 35.6124992039986 | 13.1438199158914 |
| 35.6149992039427 | 14.1010283362215 |
| 35.6174992038868 | 13.1763772365338 |
| 35.6199992038310 | 14.1391171312734 |
| 35.6224992037751 | 13.1881202279783 |
| 35.6249992037192 | 14.2002146598062 |
| 35.6274992036633 | 13.2046916001170 |
| 35.6299992036074 | 14.2660930788825 |
| 35.6324992035516 | 13.2380307913140 |

|                  |                  |
|------------------|------------------|
| 35.6349992034957 | 14.3040991915451 |
| 35.6374992034398 | 13.2943101754105 |
| 35.6399992033839 | 14.3183376446940 |
| 35.6424992033280 | 13.3293974532224 |
| 35.6449992032722 | 14.3524078817881 |
| 35.6474992032163 | 13.3578631724041 |
| 35.6499992031604 | 14.4083855218474 |
| 35.6524992031045 | 13.3840499609780 |
| 35.6549992030486 | 14.4667510543660 |
| 35.6574992029928 | 13.4298731764656 |
| 35.6599992029369 | 14.5130973939673 |
| 35.6624992028810 | 13.4587639259579 |
| 35.6649992028251 | 14.5628087200664 |
| 35.6674992027692 | 13.4924969926929 |
| 35.6699992027134 | 14.6091719220947 |
| 35.6724992026575 | 13.5249913634257 |
| 35.6749992026016 | 14.6494268619491 |
| 35.6774992025457 | 13.5819558164591 |
| 35.6799992024899 | 14.6813376945412 |
| 35.6824992024340 | 13.6196418795846 |
| 35.6849992023781 | 14.7249031560241 |
| 35.6874992023222 | 13.6448666088576 |
| 35.6899992022663 | 14.7887024925379 |
| 35.6924992022105 | 13.6612366751735 |
| 35.6949992021546 | 14.8525021305758 |
| 35.6974992020987 | 13.7129461089478 |
| 35.6999992020428 | 14.8868874763104 |
| 35.7024992019869 | 13.7655869600318 |
| 35.7049992019311 | 14.9157212621062 |
| 35.7074992018752 | 13.8063888291499 |
| 35.7099992018193 | 14.9604337098196 |
| 35.7124992017634 | 13.8284508749089 |
| 35.7149992017075 | 15.0181068803488 |
| 35.7174992016517 | 13.8639087472920 |
| 35.7199992015958 | 15.0606440630101 |
| 35.7224992015399 | 13.9016299492371 |
| 35.7249992014840 | 15.1011949419063 |
| 35.7274992014281 | 13.9394988540107 |
| 35.7299992013723 | 15.1465735930922 |
| 35.7324992013164 | 13.9718118641539 |
| 35.7349992012605 | 15.1953505620124 |
| 35.7374992012046 | 14.0123387676152 |
| 35.7399992011487 | 15.2281947204084 |
| 35.7424992010929 | 14.0530716307496 |
| 35.7449992010370 | 15.2539773921970 |
| 35.7474992009811 | 14.0837248271045 |
| 35.7499992009252 | 15.2991600736211 |
| 35.7524992008694 | 14.1101190704188 |
| 35.7549992008135 | 15.3526645784436 |
| 35.7574992007576 | 14.1425107699045 |
| 35.7599992007017 | 15.4003257413561 |
| 35.7624992006458 | 14.1881775329065 |

|                  |                  |
|------------------|------------------|
| 35.7649992005900 | 15.4203641606420 |
| 35.7674992005341 | 14.2202727036177 |
| 35.7699992004782 | 15.4515053220334 |
| 35.7724992004223 | 14.2499066907516 |
| 35.7749992003664 | 15.4900735562414 |
| 35.7774992003106 | 14.2808638720448 |
| 35.7799992002547 | 15.5346920221987 |
| 35.7824992001988 | 14.3295817624840 |
| 35.7849992001429 | 15.5619858166157 |
| 35.7874992000870 | 14.3557062238862 |
| 35.7899992000312 | 15.6015871513556 |
| 35.7924991999753 | 14.3782342473771 |
| 35.7949991999194 | 15.6467720362165 |
| 35.7974991998635 | 14.4029466402484 |
| 35.7999991998076 | 15.6788538213992 |
| 35.8024991997518 | 14.4584273842197 |
| 35.8049991996959 | 15.6985598851468 |
| 35.8074991996400 | 14.5004763707922 |
| 35.8099991995841 | 15.7260293192248 |
| 35.8124991995282 | 14.5320701711895 |
| 35.8149991994724 | 15.7796600804614 |
| 35.8174991994165 | 14.5510081117782 |
| 35.8199991993606 | 15.8234775013532 |
| 35.8224991993047 | 14.6004414150451 |
| 35.8249991992489 | 15.8538235992191 |
| 35.8274991991930 | 14.6442772719501 |
| 35.8299991991371 | 15.8736241883979 |
| 35.8324991990812 | 14.6822067042647 |
| 35.8349991990253 | 15.9163225950978 |
| 35.8374991989695 | 14.7030803266127 |
| 35.8399991989136 | 15.9541014859258 |
| 35.8424991988577 | 14.7457512926320 |
| 35.8449991988018 | 15.9809364944658 |
| 35.8474991987459 | 14.7882306593636 |
| 35.8499991986901 | 16.0108792765169 |
| 35.8524991986342 | 14.8258975006808 |
| 35.8549991985783 | 16.0620980951026 |
| 35.8574991985224 | 14.8578440640603 |
| 35.8599991984665 | 16.1092043688729 |
| 35.8624991984107 | 14.9084454671200 |
| 35.8649991983548 | 16.1224780237432 |
| 35.8674991982989 | 14.9553061229903 |
| 35.8699991982430 | 16.1345319152385 |
| 35.8724991981871 | 14.9842315561316 |
| 35.8749991981313 | 16.1678810214566 |
| 35.8774991980754 | 15.0094260573759 |
| 35.8799991980195 | 16.2235197706818 |
| 35.8824991979636 | 15.0492257870720 |
| 35.8849991979077 | 16.2575969135885 |
| 35.8874991978519 | 15.0974715875646 |
| 35.8899991977960 | 16.2862731074598 |
| 35.8924991977401 | 15.1303545924114 |

|                  |                  |
|------------------|------------------|
| 35.8949991976842 | 16.3165906237616 |
| 35.8974991976283 | 15.1645923024399 |
| 35.8999991975725 | 16.3492494817133 |
| 35.9024991975166 | 15.2108284336508 |
| 35.9049991974607 | 16.3597105288568 |
| 35.9074991974048 | 15.2690720469369 |
| 35.9099991973490 | 16.3683202864274 |
| 35.9124991972931 | 15.2910661370085 |
| 35.9149991972372 | 16.4045569298346 |
| 35.9174991971813 | 15.3009728907417 |
| 35.9199991971254 | 16.4578308094980 |
| 35.9224991970696 | 15.3239596810176 |
| 35.9249991970137 | 16.4910142060724 |
| 35.9274991969578 | 15.3842180227519 |
| 35.9299991969019 | 16.4940250265335 |
| 35.9324991968460 | 15.4261698208025 |
| 35.9349991967902 | 16.5091436319083 |
| 35.9374991967343 | 15.4562803909960 |
| 35.9399991966784 | 16.5307382464431 |
| 35.9424991966225 | 15.4770236757046 |
| 35.9449991965666 | 16.5471554920459 |
| 35.9474991965108 | 15.5200021252782 |
| 35.9499991964549 | 16.5529658505746 |
| 35.9524991963990 | 15.5447626035484 |
| 35.9549991963431 | 16.5819740470818 |
| 35.9574991962872 | 15.5688446405846 |
| 35.9599991962314 | 16.6146373659398 |
| 35.9624991961755 | 15.5903130732142 |
| 35.9649991961196 | 16.6363605593211 |
| 35.9674991960637 | 15.6366160664156 |
| 35.9699991960078 | 16.6289972064945 |
| 35.9724991959520 | 15.6692762028837 |
| 35.9749991958961 | 16.6319411573263 |
| 35.9774991958402 | 15.6946487652879 |
| 35.9799991957843 | 16.6553174752990 |
| 35.9824991957285 | 15.7116154156363 |
| 35.9849991956726 | 16.6822699454544 |
| 35.9874991956167 | 15.7495731821845 |
| 35.9899991955608 | 16.6917961866560 |
| 35.9924991955049 | 15.7841730420573 |
| 35.9949991954491 | 16.7020117174773 |
| 35.9974991953932 | 15.8173620248196 |
| 35.9999991953373 | 16.7249232330850 |
| 36.0024991952814 | 15.8468819621628 |
| 36.0049991952255 | 16.7493071984883 |
| 36.0074991951697 | 15.8870670191002 |
| 36.0099991951138 | 16.7663823072703 |
| 36.0124991950579 | 15.9182814445019 |
| 36.0149991950020 | 16.7800501889622 |
| 36.0174991949461 | 15.9392571053080 |
| 36.0199991948903 | 16.8056945186723 |
| 36.0224991948344 | 15.9742005493617 |

|                  |                  |
|------------------|------------------|
| 36.0249991947785 | 16.8197810884708 |
| 36.0274991947226 | 16.0293272876027 |
| 36.0299991946667 | 16.8292065682991 |
| 36.0324991946109 | 16.0894577708397 |
| 36.0349991945550 | 16.8397413625190 |
| 36.0374991944991 | 16.1266102708303 |
| 36.0399991944432 | 16.8787797444564 |
| 36.0424991943873 | 16.1555403047033 |
| 36.0449991943315 | 16.9222000935281 |
| 36.0474991942756 | 16.1865885601551 |
| 36.0499991942197 | 16.9636536933465 |
| 36.0524991941638 | 16.2409469385367 |
| 36.0549991941079 | 16.9821039116165 |
| 36.0574991940521 | 16.2923211856611 |
| 36.0599991939962 | 16.9991647000243 |
| 36.0624991939403 | 16.3529525658839 |
| 36.0649991938844 | 17.0133508946299 |
| 36.0674991938286 | 16.3999426118334 |
| 36.0699991937727 | 17.0309365431962 |
| 36.0724991937168 | 16.4503548150273 |
| 36.0749991936609 | 17.0627615522402 |
| 36.0774991936050 | 16.4784623423262 |
| 36.0799991935492 | 17.1164911274004 |
| 36.0824991934933 | 16.5194196176898 |
| 36.0849991934374 | 17.1744142558058 |
| 36.0874991933815 | 16.5675887795224 |
| 36.0899991933256 | 17.2034030912861 |
| 36.0924991932698 | 16.6442528626119 |
| 36.0949991932139 | 17.2199280461362 |
| 36.0974991931580 | 16.7060011540386 |
| 36.0999991931021 | 17.2311212481832 |
| 36.1024991930462 | 16.7634954369897 |
| 36.1049991929904 | 17.2699626683236 |
| 36.1074991929345 | 16.7933718404638 |
| 36.1099991928786 | 17.3122211266695 |
| 36.1124991928227 | 16.8274332788026 |
| 36.1149991927668 | 17.3600713422473 |
| 36.1174991927110 | 16.8624671977181 |
| 36.1199991926551 | 17.3919672633434 |
| 36.1224991925992 | 16.9197931826347 |
| 36.1249991925433 | 17.4174275174349 |
| 36.1274991924874 | 16.9842111861482 |
| 36.1299991924316 | 17.4313265300738 |
| 36.1324991923757 | 17.0567328410815 |
| 36.1349991923198 | 17.4486809869169 |
| 36.1374991922639 | 17.1059556848460 |
| 36.1399991922081 | 17.4802782654960 |
| 36.1424991921522 | 17.1414433249978 |
| 36.1449991920963 | 17.5292481487173 |
| 36.1474991920404 | 17.1678550940934 |
| 36.1499991919845 | 17.5811852219040 |
| 36.1524991919287 | 17.2098800772379 |

|                  |                  |
|------------------|------------------|
| 36.1549991918728 | 17.6035953944597 |
| 36.1574991918169 | 17.2669537679602 |
| 36.1599991917610 | 17.6108532532803 |
| 36.1624991917051 | 17.3249714209571 |
| 36.1649991916493 | 17.6092288039237 |
| 36.1674991915934 | 17.3716227015520 |
| 36.1699991915375 | 17.6270229037966 |
| 36.1724991914816 | 17.3996544769149 |
| 36.1749991914257 | 17.6530304754279 |
| 36.1774991913699 | 17.4254054104135 |
| 36.1799991913140 | 17.6977925150551 |
| 36.1824991912581 | 17.4522796966215 |
| 36.1849991912022 | 17.7330794951785 |
| 36.1874991911463 | 17.4980913917738 |
| 36.1899991910905 | 17.7565070970885 |
| 36.1924991910346 | 17.5539553737185 |
| 36.1949991909787 | 17.7589599498891 |
| 36.1974991909228 | 17.6132584079068 |
| 36.1999991908669 | 17.7632558104157 |
| 36.2024991908111 | 17.6475649413186 |
| 36.2049991907552 | 17.7858672083609 |
| 36.2074991906993 | 17.6719837576735 |
| 36.2099991906434 | 17.8243134336656 |
| 36.2124991905876 | 17.6862035156440 |
| 36.2149991905317 | 17.8583965745594 |
| 36.2174991904758 | 17.7200047671948 |
| 36.2199991904199 | 17.8739877905834 |
| 36.2224991903640 | 17.7611797142731 |
| 36.2249991903082 | 17.8796056620442 |
| 36.2274991902523 | 17.8152192255343 |
| 36.2299991901964 | 17.8844483447240 |
| 36.2324991901405 | 17.8651047353950 |
| 36.2349991900846 | 17.9050212095805 |
| 36.2374991900288 | 17.9120259223377 |
| 36.2399991899729 | 17.9348619618056 |
| 36.2424991899170 | 17.9436412601967 |
| 36.2449991898611 | 17.9835904737821 |
| 36.2474991898052 | 17.9805352004575 |
| 36.2499991897494 | 18.0271841405842 |
| 36.2524991896935 | 18.0177136947655 |
| 36.2549991896376 | 18.0506108144536 |
| 36.2574991895817 | 18.0674508324360 |
| 36.2599991895258 | 18.0507744672313 |
| 36.2624991894700 | 18.1137504611436 |
| 36.2649991894141 | 18.0498761439226 |
| 36.2674991893582 | 18.1561126298536 |
| 36.2699991893023 | 18.0603256687557 |
| 36.2724991892464 | 18.1891330133052 |
| 36.2749991891906 | 18.0975255715142 |
| 36.2774991891347 | 18.2210302151145 |
| 36.2799991890788 | 18.1515301014403 |
| 36.2824991890229 | 18.2614923506603 |



|                  |                  |
|------------------|------------------|
| 36.2849991889670 | 18.2032535733308 |
| 36.2874991889112 | 18.3197329699220 |
| 36.2899991888553 | 18.2354484952607 |
| 36.2924991887994 | 18.3855119001814 |
| 36.2949991887435 | 18.2481962330290 |
| 36.2974991886877 | 18.4452756287787 |
| 36.2999991886318 | 18.2523992319960 |
| 36.3024991885759 | 18.4880011282961 |
| 36.3049991885200 | 18.2658808781764 |
| 36.3074991884641 | 18.5187808544686 |
| 36.3099991884083 | 18.2998175694342 |
| 36.3124991883524 | 18.5530651328463 |
| 36.3149991882965 | 18.3438890021643 |
| 36.3174991882406 | 18.5945724369033 |
| 36.3199991881847 | 18.3963820238172 |
| 36.3224991881289 | 18.6452318472744 |
| 36.3249991880730 | 18.4397708964717 |
| 36.3274991880171 | 18.7086504356254 |
| 36.3299991879612 | 18.4685713350915 |
| 36.3324991879053 | 18.7767130175631 |
| 36.3349991878495 | 18.4815276560680 |
| 36.3374991877936 | 18.8371411740891 |
| 36.3399991877377 | 18.4997348994713 |
| 36.3424991876818 | 18.8851219341943 |
| 36.3449991876259 | 18.5302450622908 |
| 36.3474991875701 | 18.9288213460087 |
| 36.3499991875142 | 18.5718189212324 |
| 36.3524991874583 | 18.9724567580000 |
| 36.3549991874024 | 18.6185248758865 |
| 36.3574991873465 | 19.0168517659342 |
| 36.3599991872907 | 18.6681211685621 |
| 36.3624991872348 | 19.0611273146293 |
| 36.3649991871789 | 18.7098297158195 |
| 36.3674991871230 | 19.1190267825876 |
| 36.3699991870672 | 18.7344339128426 |
| 36.3724991870113 | 19.1799507288221 |
| 36.3749991869554 | 18.7463136683115 |
| 36.3774991868995 | 19.2396105368957 |
| 36.3799991868436 | 18.7599243047054 |
| 36.3824991867878 | 19.2826616801065 |
| 36.3849991867319 | 18.7914002810322 |
| 36.3874991866760 | 19.3267355866655 |
| 36.3899991866201 | 18.8371783637064 |
| 36.3924991865642 | 19.3711612446493 |
| 36.3949991865084 | 18.8834300862870 |
| 36.3974991864525 | 19.4171051842764 |
| 36.3999991863966 | 18.9258135234301 |
| 36.4024991863407 | 19.4518753912583 |
| 36.4049991862848 | 18.9585630190356 |
| 36.4074991862290 | 19.4999388380390 |
| 36.4099991861731 | 18.9755564003645 |
| 36.4124991861172 | 19.5557868905215 |

|                  |                  |
|------------------|------------------|
| 36.4149991860613 | 18.9824205857843 |
| 36.4174991860054 | 19.6135443379501 |
| 36.4199991859496 | 18.9984422706817 |
| 36.4224991858937 | 19.6525736326878 |
| 36.4249991858378 | 19.0339657072870 |
| 36.4274991857819 | 19.6879867898975 |
| 36.4299991857260 | 19.0766903080642 |
| 36.4324991856702 | 19.7225044813052 |
| 36.4349991856143 | 19.1151010232054 |
| 36.4374991855584 | 19.7634473659951 |
| 36.4399991855025 | 19.1455011743549 |
| 36.4424991854466 | 19.8010835434926 |
| 36.4449991853908 | 19.1705134951640 |
| 36.4474991853349 | 19.8451128214468 |
| 36.4499991852790 | 19.1809271092839 |
| 36.4524991852231 | 19.8967628396552 |
| 36.4549991851673 | 19.1928714488667 |
| 36.4574991851114 | 19.9439159495117 |
| 36.4599991850555 | 19.2147487623098 |
| 36.4624991849996 | 19.9852872140183 |
| 36.4649991849437 | 19.2607485703923 |
| 36.4674991848879 | 20.0216128311475 |
| 36.4699991848320 | 19.3093921377414 |
| 36.4724991847761 | 20.0716510121342 |
| 36.4749991847202 | 19.3435094324041 |
| 36.4774991846643 | 20.1158641944769 |
| 36.4799991846085 | 19.3599495170632 |
| 36.4824991845526 | 20.1555007161557 |
| 36.4849991844967 | 19.3827059225373 |
| 36.4874991844408 | 20.1819071945515 |
| 36.4899991843849 | 19.4134792564274 |
| 36.4924991843291 | 20.2295986955920 |
| 36.4949991842732 | 19.4445148936955 |
| 36.4974991842173 | 20.2733207540366 |
| 36.4999991841614 | 19.4752783433829 |
| 36.5024991841055 | 20.3221637069315 |
| 36.5049991840497 | 19.5066152096542 |
| 36.5074991839938 | 20.3566220952188 |
| 36.5099991839379 | 19.5416399119312 |
| 36.5124991838820 | 20.4091351913193 |
| 36.5149991838261 | 19.5651612946859 |
| 36.5174991837703 | 20.4468441724747 |
| 36.5199991837144 | 19.5914997353669 |
| 36.5224991836585 | 20.4834786095220 |
| 36.5249991836026 | 19.6150528899061 |
| 36.5274991835468 | 20.4933176443414 |
| 36.5299991834909 | 19.6511816145480 |
| 36.5324991834350 | 20.5231949550964 |
| 36.5349991833791 | 19.6739539664040 |
| 36.5374991833232 | 20.5522292251130 |
| 36.5399991832674 | 19.6993886885287 |
| 36.5424991832115 | 20.6004101211260 |

|                  |                  |
|------------------|------------------|
| 36.5449991831556 | 19.7143410993165 |
| 36.5474991830997 | 20.6324735341544 |
| 36.5499991830438 | 19.7341956961609 |
| 36.5524991829880 | 20.6738637087536 |
| 36.5549991829321 | 19.7514525071604 |
| 36.5574991828762 | 20.6952359183958 |
| 36.5599991828203 | 19.7831933800974 |
| 36.5624991827644 | 20.7193732453478 |
| 36.5649991827086 | 19.8224590334252 |
| 36.5674991826527 | 20.7379473967107 |
| 36.5699991825968 | 19.8609258808784 |
| 36.5724991825409 | 20.7774639738810 |
| 36.5749991824850 | 19.8797712956476 |
| 36.5774991824292 | 20.8155400012886 |
| 36.5799991823733 | 19.8786884392907 |
| 36.5824991823174 | 20.8507304011549 |
| 36.5849991822615 | 19.8903568281850 |
| 36.5874991822056 | 20.8710786737919 |
| 36.5899991821498 | 19.9131305905855 |
| 36.5924991820939 | 20.8941279037123 |
| 36.5949991820380 | 19.9542590508515 |
| 36.5974991819821 | 20.9254418966175 |
| 36.5999991819263 | 19.9812994787674 |
| 36.6024991818704 | 20.9526102306043 |
| 36.6049991818145 | 20.0117241850701 |
| 36.6074991817586 | 20.9866944490469 |
| 36.6099991817027 | 20.0313146673109 |
| 36.6124991816469 | 21.0212614279588 |
| 36.6149991815910 | 20.0551754647703 |
| 36.6174991815351 | 21.0681394507105 |
| 36.6199991814792 | 20.0663408939745 |
| 36.6224991814233 | 21.0944150836121 |
| 36.6249991813675 | 20.0916956308277 |
| 36.6274991813116 | 21.1115545042088 |
| 36.6299991812557 | 20.1278111662597 |
| 36.6324991811998 | 21.1203831260682 |
| 36.6349991811439 | 20.1690301426516 |
| 36.6374991810881 | 21.1583711220410 |
| 36.6399991810322 | 20.2027680512576 |
| 36.6424991809763 | 21.1944896727986 |
| 36.6449991809204 | 20.2249093081769 |
| 36.6474991808645 | 21.2418866638176 |
| 36.6499991808087 | 20.2466382434894 |
| 36.6524991807528 | 21.2714925608314 |
| 36.6549991806969 | 20.2654112029775 |
| 36.6574991806410 | 21.3068604792501 |
| 36.6599991805851 | 20.3004383015326 |
| 36.6624991805293 | 21.3199805342763 |
| 36.6649991804734 | 20.3392840338898 |
| 36.6674991804175 | 21.3480860991953 |
| 36.6699991803616 | 20.3889255613654 |
| 36.6724991803057 | 21.3693661026556 |

|                  |                  |
|------------------|------------------|
| 36.6749991802499 | 20.4215706910273 |
| 36.6774991801940 | 21.4138222646135 |
| 36.6799991801381 | 20.4412823443914 |
| 36.6824991800822 | 21.4431606305935 |
| 36.6849991800264 | 20.4523037449597 |
| 36.6874991799705 | 21.4764656010990 |
| 36.6899991799146 | 20.4776521179957 |
| 36.6924991798587 | 21.4970621370197 |
| 36.6949991798028 | 20.5078207381435 |
| 36.6974991797470 | 21.5273028890556 |
| 36.6999991796911 | 20.5346251193713 |
| 36.7024991796352 | 21.5426494783481 |
| 36.7049991795793 | 20.5628667477638 |
| 36.7074991795234 | 21.5610287592066 |
| 36.7099991794676 | 20.5924684451964 |
| 36.7124991794117 | 21.5792813441116 |
| 36.7149991793558 | 20.6278460872592 |
| 36.7174991792999 | 21.6134020209465 |
| 36.7199991792440 | 20.6457566212017 |
| 36.7224991791882 | 21.6421246898025 |
| 36.7249991791323 | 20.6626361944067 |
| 36.7274991790764 | 21.6654405328886 |
| 36.7299991790205 | 20.6766510914880 |
| 36.7324991789646 | 21.6821307961526 |
| 36.7349991789088 | 20.7017123529053 |
| 36.7374991788529 | 21.7048824757728 |
| 36.7399991787970 | 20.7269571453085 |
| 36.7424991787411 | 21.7266137743879 |
| 36.7449991786852 | 20.7558236714322 |
| 36.7474991786294 | 21.7421710850558 |
| 36.7499991785735 | 20.7857503014606 |
| 36.7524991785176 | 21.7561253942813 |
| 36.7549991784617 | 20.8168498315385 |
| 36.7574991784059 | 21.7702747600835 |
| 36.7599991783500 | 20.8430767792759 |
| 36.7624991782941 | 21.7985902632256 |
| 36.7649991782382 | 20.8538743878119 |
| 36.7674991781823 | 21.8251395129212 |
| 36.7699991781265 | 20.8696324876493 |
| 36.7724991780706 | 21.8519594314152 |
| 36.7749991780147 | 20.8905928753244 |
| 36.7774991779588 | 21.8653935041872 |
| 36.7799991779029 | 20.9252338731254 |
| 36.7824991778471 | 21.8844916236097 |
| 36.7849991777912 | 20.9613034093488 |
| 36.7874991777353 | 21.9024146667796 |
| 36.7899991776794 | 21.0027774455462 |
| 36.7924991776235 | 21.9353231320840 |
| 36.7949991775677 | 21.0405140402969 |
| 36.7974991775118 | 21.9657013491075 |
| 36.7999991774559 | 21.0662808240187 |
| 36.8024991774000 | 21.9964333976014 |

|                  |                  |
|------------------|------------------|
| 36.8049991773441 | 21.0845040718409 |
| 36.8074991772883 | 22.0139076122140 |
| 36.8099991772324 | 21.1059642381736 |
| 36.8124991771765 | 22.0385210665289 |
| 36.8149991771206 | 21.1482479920018 |
| 36.8174991770647 | 22.0609127847838 |
| 36.8199991770089 | 21.1987566187823 |
| 36.8224991769530 | 22.1014395635595 |
| 36.8249991768971 | 21.2522220328700 |
| 36.8274991768412 | 22.1412097988994 |
| 36.8299991767853 | 21.2986588664692 |
| 36.8324991767295 | 22.1921986010015 |
| 36.8349991766736 | 21.3411755265623 |
| 36.8374991766177 | 22.2364200030667 |
| 36.8399991765618 | 21.3857051192420 |
| 36.8424991765060 | 22.2702047846286 |
| 36.8449991764501 | 21.4319249342085 |
| 36.8474991763942 | 22.2964946927286 |
| 36.8499991763383 | 21.4805238748806 |
| 36.8524991762824 | 22.3275091328773 |
| 36.8549991762266 | 21.5197342377384 |
| 36.8574991761707 | 22.3600631274724 |
| 36.8599991761148 | 21.5658766981972 |
| 36.8624991760589 | 22.4036501505151 |
| 36.8649991760030 | 21.6020335246293 |
| 36.8674991759472 | 22.4524185470919 |
| 36.8699991758913 | 21.6434829629542 |
| 36.8724991758354 | 22.4899782850017 |
| 36.8749991757795 | 21.6844765433771 |
| 36.8774991757236 | 22.5064212723823 |
| 36.8799991756678 | 21.7489112223793 |
| 36.8824991756119 | 22.5203214881434 |
| 36.8849991755560 | 21.8037510470266 |
| 36.8874991755001 | 22.5544916273651 |
| 36.8899991754442 | 21.8462977634997 |
| 36.8924991753884 | 22.6039457407675 |
| 36.8949991753325 | 21.8724513273154 |
| 36.8974991752766 | 22.6478245343121 |
| 36.8999991752207 | 21.8972123020984 |
| 36.9024991751648 | 22.6684534185141 |
| 36.9049991751090 | 21.9317448945797 |
| 36.9074991750531 | 22.6689315359111 |
| 36.9099991749972 | 21.9743462431413 |
| 36.9124991749413 | 22.6684532465906 |
| 36.9149991748855 | 22.0234469934296 |
| 36.9174991748296 | 22.6778158661958 |
| 36.9199991747737 | 22.0645936503554 |
| 36.9224991747178 | 22.6982277129522 |
| 36.9249991746619 | 22.1045863532799 |
| 36.9274991746061 | 22.7387323486603 |
| 36.9299991745502 | 22.1211011307463 |
| 36.9324991744943 | 22.7854371047980 |

|                  |                  |
|------------------|------------------|
| 36.9349991744384 | 22.1401848308127 |
| 36.9374991743825 | 22.8117218578665 |
| 36.9399991743267 | 22.1675377831937 |
| 36.9424991742708 | 22.8133961743978 |
| 36.9449991742149 | 22.2233756043658 |
| 36.9474991741590 | 22.8018819197834 |
| 36.9499991741031 | 22.2707299966852 |
| 36.9524991740473 | 22.8058311298987 |
| 36.9549991739914 | 22.3006452255226 |
| 36.9574991739355 | 22.8234416396112 |
| 36.9599991738796 | 22.3113442817131 |
| 36.9624991738237 | 22.8508374815304 |
| 36.9649991737679 | 22.3224548543713 |
| 36.9674991737120 | 22.8764071860791 |
| 36.9699991736561 | 22.3346411502576 |
| 36.9724991736002 | 22.8914415302505 |
| 36.9749991735443 | 22.3693581674982 |
| 36.9774991734885 | 22.8856680587212 |
| 36.9799991734326 | 22.4222990616517 |
| 36.9824991733767 | 22.8804017393336 |
| 36.9849991733208 | 22.4768032230519 |
| 36.9874991732650 | 22.8929223495254 |
| 36.9899991732091 | 22.5150351265945 |
| 36.9924991731532 | 22.9316344815345 |
| 36.9949991730973 | 22.5333986886411 |
| 36.9974991730414 | 22.9633715761539 |
| 36.9999991729856 | 22.5469813172888 |
| 37.0024991729297 | 22.9737105999954 |
| 37.0049991728738 | 22.5743254617424 |
| 37.0074991728179 | 22.9661404618285 |
| 37.0099991727620 | 22.6188843497293 |
| 37.0124991727062 | 22.9603636834277 |
| 37.0149991726503 | 22.6672281934621 |
| 37.0174991725944 | 22.9695134731093 |
| 37.0199991725385 | 22.7205451603437 |
| 37.0224991724826 | 22.9963522814084 |
| 37.0249991724268 | 22.7667143325254 |
| 37.0274991723709 | 23.0415520944435 |
| 37.0299991723150 | 22.8103660897058 |
| 37.0324991722591 | 23.0965088819547 |
| 37.0349991722032 | 22.8490474701628 |
| 37.0374991721474 | 23.1355173107615 |
| 37.0399991720915 | 22.9028579939470 |
| 37.0424991720356 | 23.1512033277119 |
| 37.0449991719797 | 22.9638294783184 |
| 37.0474991719238 | 23.1636215803509 |
| 37.0499991718680 | 23.0268497056385 |
| 37.0524991718121 | 23.1807149112821 |
| 37.0549991717562 | 23.0746277872834 |
| 37.0574991717003 | 23.2145264310668 |
| 37.0599991716444 | 23.1193149138274 |
| 37.0624991715886 | 23.2558470980380 |



|                  |                  |
|------------------|------------------|
| 37.0649991715327 | 23.1656306166633 |
| 37.0674991714768 | 23.2989091818124 |
| 37.0699991714209 | 23.2229223337758 |
| 37.0724991713651 | 23.3312965289063 |
| 37.0749991713092 | 23.2935883586208 |
| 37.0774991712533 | 23.3613467025471 |
| 37.0799991711974 | 23.3626237919883 |
| 37.0824991711415 | 23.3866166357644 |
| 37.0849991710857 | 23.4192869793309 |
| 37.0874991710298 | 23.4249467746792 |
| 37.0899991709739 | 23.4568140479466 |
| 37.0924991709180 | 23.4584791496003 |
| 37.0949991708621 | 23.4949224509835 |
| 37.0974991708063 | 23.4904173087886 |
| 37.0999991707504 | 23.5376146375703 |
| 37.1024991706945 | 23.5038222832329 |
| 37.1049991706386 | 23.6037871971613 |
| 37.1074991705827 | 23.5167303446002 |
| 37.1099991705269 | 23.6725752743056 |
| 37.1124991704710 | 23.5312651334319 |
| 37.1149991704151 | 23.7384867652167 |
| 37.1174991703592 | 23.5636615589087 |
| 37.1199991703033 | 23.7782078916244 |
| 37.1224991702475 | 23.6011453212438 |
| 37.1249991701916 | 23.8006825581900 |
| 37.1274991701357 | 23.6451872674940 |
| 37.1299991700798 | 23.8179354494021 |
| 37.1324991700239 | 23.6674234591902 |
| 37.1349991699681 | 23.8515952146285 |
| 37.1374991699122 | 23.6761921100150 |
| 37.1399991698563 | 23.9089902020834 |
| 37.1424991698004 | 23.6694487055488 |
| 37.1449991697446 | 23.9760163397435 |
| 37.1474991696887 | 23.6691008985943 |
| 37.1499991696328 | 24.0401046625044 |
| 37.1524991695769 | 23.6809754279486 |
| 37.1549991695210 | 24.0769768148239 |
| 37.1574991694652 | 23.7098432239127 |
| 37.1599991694093 | 24.0944122483936 |
| 37.1624991693534 | 23.7413452604148 |
| 37.1649991692975 | 24.0959901089097 |
| 37.1674991692416 | 23.7635721356779 |
| 37.1699991691858 | 24.1127164220848 |
| 37.1724991691299 | 23.7689464341781 |
| 37.1749991690740 | 24.1554632424479 |
| 37.1774991690181 | 23.7644895932272 |
| 37.1799991689622 | 24.2202498448533 |
| 37.1824991689064 | 23.7670704734494 |
| 37.1849991688505 | 24.2790042387033 |
| 37.1874991687946 | 23.7746349548754 |
| 37.1899991687387 | 24.3246868344073 |
| 37.1924991686828 | 23.7905649359007 |

|                  |                  |
|------------------|------------------|
| 37.1949991686270 | 24.3549942125311 |
| 37.1974991685711 | 23.8107992382768 |
| 37.1999991685152 | 24.3759504679618 |
| 37.2024991684593 | 23.8442315259442 |
| 37.2049991684034 | 24.3945499526317 |
| 37.2074991683476 | 23.8708739142200 |
| 37.2099991682917 | 24.4271268143750 |
| 37.2124991682358 | 23.8933178887063 |
| 37.2149991681799 | 24.4790981057266 |
| 37.2174991681240 | 23.9008136749170 |
| 37.2199991680682 | 24.5443979715138 |
| 37.2224991680123 | 23.9183622733490 |
| 37.2249991679564 | 24.6024605504516 |
| 37.2274991679005 | 23.9328935888712 |
| 37.2299991678447 | 24.6487737107912 |
| 37.2324991677888 | 23.9570570397575 |
| 37.2349991677329 | 24.6819289871646 |
| 37.2374991676770 | 23.9780552647645 |
| 37.2399991676211 | 24.7110758723814 |
| 37.2424991675653 | 24.0085913941023 |
| 37.2449991675094 | 24.7402684286285 |
| 37.2474991674535 | 24.0325436376175 |
| 37.2499991673976 | 24.7755795247424 |
| 37.2524991673417 | 24.0582021549614 |
| 37.2549991672859 | 24.8263412414083 |
| 37.2574991672300 | 24.0681849841481 |
| 37.2599991671741 | 24.8858489902250 |
| 37.2624991671182 | 24.0856593345050 |
| 37.2649991670623 | 24.9375706681501 |
| 37.2674991670065 | 24.1000208730958 |
| 37.2699991669506 | 24.9698827716256 |
| 37.2724991668947 | 24.1199470572026 |
| 37.2749991668388 | 24.9975754671956 |
| 37.2774991667829 | 24.1357232542472 |
| 37.2799991667271 | 25.0236095644906 |
| 37.2824991666712 | 24.1621172283120 |
| 37.2849991666153 | 25.0499657298804 |
| 37.2874991665594 | 24.1818067523497 |
| 37.2899991665035 | 25.0781640903279 |
| 37.2924991664477 | 24.1939500440854 |
| 37.2949991663918 | 25.1183441021168 |
| 37.2974991663359 | 24.2015771090016 |
| 37.2999991662800 | 25.1660363353163 |
| 37.3024991662242 | 24.2183497549253 |
| 37.3049991661683 | 25.2042906113819 |
| 37.3074991661124 | 24.2364368849751 |
| 37.3099991660565 | 25.2332363679823 |
| 37.3124991660006 | 24.2486835055047 |
| 37.3149991659448 | 25.2519672174595 |
| 37.3174991658889 | 24.2568719298310 |
| 37.3199991658330 | 25.2768396367507 |
| 37.3224991657771 | 24.2637224860877 |

|                  |                  |
|------------------|------------------|
| 37.3249991657212 | 25.3001907098351 |
| 37.3274991656654 | 24.2799683298883 |
| 37.3299991656095 | 25.3306795702399 |
| 37.3324991655536 | 24.3000023206248 |
| 37.3349991654977 | 25.3546945965590 |
| 37.3374991654418 | 24.3223879375967 |
| 37.3399991653860 | 25.3840857886068 |
| 37.3424991653301 | 24.3301481660279 |
| 37.3449991652742 | 25.4143261098855 |
| 37.3474991652183 | 24.3410868933939 |
| 37.3499991651624 | 25.4426146585466 |
| 37.3524991651066 | 24.3485213502905 |
| 37.3549991650507 | 25.4702388612674 |
| 37.3574991649948 | 24.3704105082804 |
| 37.3599991649389 | 25.4972724613520 |
| 37.3624991648830 | 24.3902784488293 |
| 37.3649991648272 | 25.5357380557590 |
| 37.3674991647713 | 24.4251971147953 |
| 37.3699991647154 | 25.5649929287256 |
| 37.3724991646595 | 24.4540738046833 |
| 37.3749991646037 | 25.5995010488656 |
| 37.3774991645478 | 24.4920680600087 |
| 37.3799991644919 | 25.6264976586615 |
| 37.3824991644360 | 24.5079539215736 |
| 37.3849991643801 | 25.6674438003023 |
| 37.3874991643243 | 24.5241926407634 |
| 37.3899991642684 | 25.6995503749691 |
| 37.3924991642125 | 24.5310350060296 |
| 37.3949991641566 | 25.7355214553101 |
| 37.3974991641007 | 24.5592816599647 |
| 37.3999991640449 | 25.7625224904575 |
| 37.4024991639890 | 24.5936012320255 |
| 37.4049991639331 | 25.7984136896334 |
| 37.4074991638772 | 24.6362383973928 |
| 37.4099991638213 | 25.8385762428654 |
| 37.4124991637655 | 24.6649631619189 |
| 37.4149991637096 | 25.8727696516187 |
| 37.4174991636537 | 24.6952906677082 |
| 37.4199991635978 | 25.8998381375872 |
| 37.4224991635419 | 24.7078487013453 |
| 37.4249991634861 | 25.9249032053643 |
| 37.4274991634302 | 24.7210668658487 |
| 37.4299991633743 | 25.9589535368666 |
| 37.4324991633184 | 24.7409636005093 |
| 37.4349991632625 | 25.9799387222494 |
| 37.4374991632067 | 24.7704148748848 |
| 37.4399991631508 | 26.0042300456086 |
| 37.4424991630949 | 24.7910424816394 |
| 37.4449991630390 | 26.0305599059401 |
| 37.4474991629831 | 24.8045875010474 |
| 37.4499991629273 | 26.0696630755774 |
| 37.4524991628714 | 24.8273009962951 |

|                  |                  |
|------------------|------------------|
| 37.4549991628155 | 26.0949970275019 |
| 37.4574991627596 | 24.8564612519525 |
| 37.4599991627038 | 26.1133964446606 |
| 37.4624991626479 | 24.8853920261293 |
| 37.4649991625920 | 26.1319608584190 |
| 37.4674991625361 | 24.8964196923276 |
| 37.4699991624802 | 26.1540425182730 |
| 37.4724991624244 | 24.9128496049952 |
| 37.4749991623685 | 26.1794648989209 |
| 37.4774991623126 | 24.9275466248828 |
| 37.4799991622567 | 26.1986539502182 |
| 37.4824991622008 | 24.9524195070088 |
| 37.4849991621450 | 26.2235026289424 |
| 37.4874991620891 | 24.9595064055452 |
| 37.4899991620332 | 26.2493807536309 |
| 37.4924991619773 | 24.9799498877502 |
| 37.4949991619214 | 26.2742333554982 |
| 37.4974991618656 | 25.0072642365490 |
| 37.4999991618097 | 26.2841413454928 |
| 37.5024991617538 | 25.0464922169205 |
| 37.5049991616979 | 26.3011306717587 |
| 37.5074991616420 | 25.0614324617646 |
| 37.5099991615862 | 26.3296473707130 |
| 37.5124991615303 | 25.0863386554083 |
| 37.5149991614744 | 26.3572954665302 |
| 37.5174991614185 | 25.0980750765413 |
| 37.5199991613626 | 26.3811861390950 |
| 37.5224991613068 | 25.1216190755642 |
| 37.5249991612509 | 26.4018028519230 |
| 37.5274991611950 | 25.1366970534684 |
| 37.5299991611391 | 26.4341729638417 |
| 37.5324991610833 | 25.1750726319318 |
| 37.5349991610274 | 26.4560094000283 |
| 37.5374991609715 | 25.2100670030285 |
| 37.5399991609156 | 26.4758950144873 |
| 37.5424991608597 | 25.2465249387303 |
| 37.5449991608039 | 26.4925446077536 |
| 37.5474991607480 | 25.2627841957527 |
| 37.5499991606921 | 26.5262973468234 |
| 37.5524991606362 | 25.2927170921746 |
| 37.5549991605803 | 26.5598494582925 |
| 37.5574991605245 | 25.3290088982348 |
| 37.5599991604686 | 26.5946254892364 |
| 37.5624991604127 | 25.3727237644796 |
| 37.5649991603568 | 26.6265862658578 |
| 37.5674991603009 | 25.3998822824383 |
| 37.5699991602451 | 26.6641147852382 |
| 37.5724991601892 | 25.4322919095040 |
| 37.5749991601333 | 26.6982104516599 |
| 37.5774991600774 | 25.4759753048359 |
| 37.5799991600215 | 26.7171610750320 |
| 37.5824991599657 | 25.5245983416887 |

|                  |                  |
|------------------|------------------|
| 37.5849991599098 | 26.7352110599758 |
| 37.5874991598539 | 25.5602144070249 |
| 37.5899991597980 | 26.7695978114862 |
| 37.5924991597421 | 25.5905778902587 |
| 37.5949991596863 | 26.8180625901446 |
| 37.5974991596304 | 25.6335494822256 |
| 37.5999991595745 | 26.8588674113566 |
| 37.6024991595186 | 25.6748243693797 |
| 37.6049991594627 | 26.8977164519151 |
| 37.6074991594069 | 25.7183784084885 |
| 37.6099991593510 | 26.9367886446730 |
| 37.6124991592951 | 25.7525653239170 |
| 37.6149991592392 | 26.9691913911984 |
| 37.6174991591834 | 25.8008735461644 |
| 37.6199991591275 | 26.9868989243737 |
| 37.6224991590716 | 25.8407834316315 |
| 37.6249991590157 | 27.0035444220090 |
| 37.6274991589598 | 25.8859029273915 |
| 37.6299991589040 | 27.0390864204725 |
| 37.6324991588481 | 25.9187528183420 |
| 37.6349991587922 | 27.0846854801365 |
| 37.6374991587363 | 25.9616140392844 |
| 37.6399991586804 | 27.1275177420002 |
| 37.6424991586246 | 25.9887185469298 |
| 37.6449991585687 | 27.1595575231518 |
| 37.6474991585128 | 26.0243201638445 |
| 37.6499991584569 | 27.1835546901466 |
| 37.6524991584010 | 26.0547730905055 |
| 37.6549991583452 | 27.2047999121963 |
| 37.6574991582893 | 26.1084175490973 |
| 37.6599991582334 | 27.2183806856001 |
| 37.6624991581775 | 26.1542247394510 |
| 37.6649991581216 | 27.2358046547626 |
| 37.6674991580658 | 26.1973192410809 |
| 37.6699991580099 | 27.2613234677051 |
| 37.6724991579540 | 26.2156788564215 |
| 37.6749991578981 | 27.3047127986389 |
| 37.6774991578422 | 26.2446546926234 |
| 37.6799991577864 | 27.3322997207290 |
| 37.6824991577305 | 26.2693526797477 |
| 37.6849991576746 | 27.3534439618056 |
| 37.6874991576187 | 26.2990117724779 |
| 37.6899991575629 | 27.3624339504585 |
| 37.6924991575070 | 26.3266750321493 |
| 37.6949991574511 | 27.3767686008731 |
| 37.6974991573952 | 26.3674617712004 |
| 37.6999991573393 | 27.3829478337633 |
| 37.7024991572835 | 26.4109675400394 |
| 37.7049991572276 | 27.3983523912391 |
| 37.7074991571717 | 26.4523368961569 |
| 37.7099991571158 | 27.4224993176976 |
| 37.7124991570599 | 26.4761368958363 |

|                  |                  |
|------------------|------------------|
| 37.7149991570041 | 27.4529766442860 |
| 37.7174991569482 | 26.4919881190534 |
| 37.7199991568923 | 27.4756510304196 |
| 37.7224991568364 | 26.5118933011606 |
| 37.7249991567805 | 27.4801113405719 |
| 37.7274991567247 | 26.5372724160482 |
| 37.7299991566688 | 27.4829045483888 |
| 37.7324991566129 | 26.5699276674054 |
| 37.7349991565570 | 27.4866033340104 |
| 37.7374991565011 | 26.6052990952790 |
| 37.7399991564453 | 27.5070113346979 |
| 37.7424991563894 | 26.6468116424062 |
| 37.7449991563335 | 27.5251398521289 |
| 37.7474991562776 | 26.6840382169822 |
| 37.7499991562217 | 27.5577097246888 |
| 37.7524991561659 | 26.7245324740930 |
| 37.7549991561100 | 27.5865573561098 |
| 37.7574991560541 | 26.7594030382904 |
| 37.7599991559982 | 27.6099067278571 |
| 37.7624991559424 | 26.7982011728569 |
| 37.7649991558865 | 27.6199527322458 |
| 37.7674991558306 | 26.8236416641725 |
| 37.7699991557747 | 27.6327336117099 |
| 37.7724991557188 | 26.8517192606047 |
| 37.7749991556630 | 27.6541390386590 |
| 37.7774991556071 | 26.8831364200862 |
| 37.7799991555512 | 27.6847669701914 |
| 37.7824991554953 | 26.9288890707072 |
| 37.7849991554394 | 27.7228583439698 |
| 37.7874991553836 | 26.9847568110759 |
| 37.7899991553277 | 27.7507170719063 |
| 37.7924991552718 | 27.0430442806771 |
| 37.7949991552159 | 27.7714232662579 |
| 37.7974991551600 | 27.0843119818385 |
| 37.7999991551042 | 27.7869756169209 |
| 37.8024991550483 | 27.1203252913644 |
| 37.8049991549924 | 27.8040859556393 |
| 37.8074991549365 | 27.1441867843706 |
| 37.8099991548806 | 27.8272469054780 |
| 37.8124991548248 | 27.1655077845339 |
| 37.8149991547689 | 27.8591133650068 |
| 37.8174991547130 | 27.1954101950390 |
| 37.8199991546571 | 27.8949699275320 |
| 37.8224991546012 | 27.2429566568765 |
| 37.8249991545454 | 27.9170182237118 |
| 37.8274991544895 | 27.3049132920922 |
| 37.8299991544336 | 27.9327803135229 |
| 37.8324991543777 | 27.3634364658758 |
| 37.8349991543218 | 27.9443305300650 |
| 37.8374991542660 | 27.4022454436924 |
| 37.8399991542101 | 27.9686860984387 |
| 37.8424991541542 | 27.4251415153329 |



|                  |                  |
|------------------|------------------|
| 37.8449991540983 | 27.9951243060986 |
| 37.8474991540425 | 27.4485653159318 |
| 37.8499991539866 | 28.0297963619637 |
| 37.8524991539307 | 27.4850844835288 |
| 37.8549991538748 | 28.0574745011467 |
| 37.8574991538189 | 27.5350915164195 |
| 37.8599991537631 | 28.0794169737915 |
| 37.8624991537072 | 27.5898810491723 |
| 37.8649991536513 | 28.0977194837565 |
| 37.8674991535954 | 27.6365444556043 |
| 37.8699991535395 | 28.1082064033317 |
| 37.8724991534837 | 27.6702436954064 |
| 37.8749991534278 | 28.1259523015186 |
| 37.8774991533719 | 27.6947594491453 |
| 37.8799991533160 | 28.1421401549310 |
| 37.8824991532601 | 27.7257445060159 |
| 37.8849991532043 | 28.1666254725222 |
| 37.8874991531484 | 27.7671392209185 |
| 37.8899991530925 | 28.1756429660273 |
| 37.8924991530366 | 27.8177327985528 |
| 37.8949991529807 | 28.1964428545174 |
| 37.8974991529249 | 27.8588180889438 |
| 37.8999991528690 | 28.2155724185452 |
| 37.9024991528131 | 27.8920899829105 |
| 37.9049991527572 | 28.2454703905875 |
| 37.9074991527013 | 27.9163713076069 |
| 37.9099991526455 | 28.2666328761908 |
| 37.9124991525896 | 27.9424538244853 |
| 37.9149991525337 | 28.2795991087078 |
| 37.9174991524778 | 27.9715045218876 |
| 37.9199991524220 | 28.2835770146205 |
| 37.9224991523661 | 28.0161984147277 |
| 37.9249991523102 | 28.2789513441545 |
| 37.9274991522543 | 28.0568893693176 |
| 37.9299991521984 | 28.2887422465692 |
| 37.9324991521426 | 28.0965733748213 |
| 37.9349991520867 | 28.3082667158413 |
| 37.9374991520308 | 28.1181325704032 |
| 37.9399991519749 | 28.3527605193060 |
| 37.9424991519190 | 28.1423193904462 |
| 37.9449991518632 | 28.3844162882278 |
| 37.9474991518073 | 28.1715616705738 |
| 37.9499991517514 | 28.4088183340185 |
| 37.9524991516955 | 28.2214812113066 |
| 37.9549991516396 | 28.4014674833372 |
| 37.9574991515838 | 28.2703762582194 |
| 37.9599991515279 | 28.3949805648654 |
| 37.9624991514720 | 28.3099578373711 |
| 37.9649991514161 | 28.3934176551943 |
| 37.9674991513602 | 28.3248900377866 |
| 37.9699991513044 | 28.4138344653856 |
| 37.9724991512485 | 28.3360011984253 |

|                  |                  |
|------------------|------------------|
| 37.9749991511926 | 28.4469948783298 |
| 37.9774991511367 | 28.3540871677360 |
| 37.9799991510808 | 28.4727491991720 |
| 37.9824991510250 | 28.3960988897760 |
| 37.9849991509691 | 28.4866153707420 |
| 37.9874991509132 | 28.4540237004011 |
| 37.9899991508573 | 28.4787817175102 |
| 37.9924991508015 | 28.5052367264596 |
| 37.9949991507456 | 28.4861683089746 |
| 37.9974991506897 | 28.5404396544214 |
| 37.9999991506338 | 28.4948729605937 |
| 38.0024991505779 | 28.5576171831960 |
| 38.0049991505221 | 28.5295294116877 |
| 38.0074991504662 | 28.5679174319517 |
| 38.0099991504103 | 28.5539594897795 |
| 38.0124991503544 | 28.5865835550690 |
| 38.0149991502985 | 28.5784636130324 |
| 38.0174991502427 | 28.6308338499985 |
| 38.0199991501868 | 28.5784241445073 |
| 38.0224991501309 | 28.6835844912335 |
| 38.0249991500750 | 28.5767710102230 |
| 38.0274991500191 | 28.7402396479597 |
| 38.0299991499633 | 28.5839836610001 |
| 38.0324991499074 | 28.7700277959144 |
| 38.0349991498515 | 28.6150696854807 |
| 38.0374991497956 | 28.7934780067066 |
| 38.0399991497397 | 28.6649819970039 |
| 38.0424991496839 | 28.8122054525012 |
| 38.0449991496280 | 28.7035322131735 |
| 38.0474991495721 | 28.8579349831468 |
| 38.0499991495162 | 28.7234898104873 |
| 38.0524991494603 | 28.9076409628127 |
| 38.0549991494045 | 28.7175068112593 |
| 38.0574991493486 | 28.9684614555186 |
| 38.0599991492927 | 28.7185505753704 |
| 38.0624991492368 | 29.0078719395971 |
| 38.0649991491809 | 28.7255664236475 |
| 38.0674991491251 | 29.0400331222174 |
| 38.0699991490692 | 28.7631638645938 |
| 38.0724991490133 | 29.0532546406005 |
| 38.0749991489574 | 28.8041298962953 |
| 38.0774991489016 | 29.0859923973970 |
| 38.0799991488457 | 28.8427442766961 |
| 38.0824991487898 | 29.1270363542802 |
| 38.0849991487339 | 28.8524787905317 |
| 38.0874991486780 | 29.1918475332986 |
| 38.0899991486222 | 28.8540919301620 |
| 38.0924991485663 | 29.2453607213465 |
| 38.0949991485104 | 28.8601158820360 |
| 38.0974991484545 | 29.2925043137098 |
| 38.0999991483986 | 28.8853479063220 |
| 38.1024991483428 | 29.3228466888353 |

|                  |                  |
|------------------|------------------|
| 38.1049991482869 | 28.9220027551241 |
| 38.1074991482310 | 29.3544715047149 |
| 38.1099991481751 | 28.9570983331843 |
| 38.1124991481192 | 29.3818003113765 |
| 38.1149991480634 | 28.9850600428837 |
| 38.1174991480075 | 29.4202035330711 |
| 38.1199991479516 | 28.9980982014655 |
| 38.1224991478957 | 29.4649283073432 |
| 38.1249991478398 | 29.0019305698951 |
| 38.1274991477840 | 29.5154783399024 |
| 38.1299991477281 | 29.0048991763368 |
| 38.1324991476722 | 29.5595271579690 |
| 38.1349991476163 | 29.0297835330007 |
| 38.1374991475604 | 29.5956116939228 |
| 38.1399991475046 | 29.0673849160145 |
| 38.1424991474487 | 29.6380692996738 |
| 38.1449991473928 | 29.1049994490574 |
| 38.1474991473369 | 29.6815049993948 |
| 38.1499991472811 | 29.1203933682496 |
| 38.1524991472252 | 29.7210620016932 |
| 38.1549991471693 | 29.1307363181833 |
| 38.1574991471134 | 29.7444829861302 |
| 38.1599991470575 | 29.1357402537439 |
| 38.1624991470017 | 29.7706839288853 |
| 38.1649991469458 | 29.1497721641523 |
| 38.1674991468899 | 29.7998713992953 |
| 38.1699991468340 | 29.1665017079598 |
| 38.1724991467781 | 29.8454324198885 |
| 38.1749991467223 | 29.1910418351156 |
| 38.1774991466664 | 29.8808782407076 |
| 38.1799991466105 | 29.2185639714102 |
| 38.1824991465546 | 29.9233569815092 |
| 38.1849991464987 | 29.2401278018795 |
| 38.1874991464429 | 29.9600468012673 |
| 38.1899991463870 | 29.2501715256649 |
| 38.1924991463311 | 29.9967953542749 |
| 38.1949991462752 | 29.2506351821469 |
| 38.1974991462193 | 30.0122087487105 |
| 38.1999991461635 | 29.2657582962309 |
| 38.2024991461076 | 30.0329948207285 |
| 38.2049991460517 | 29.2828501836926 |
| 38.2074991459958 | 30.0547184044611 |
| 38.2099991459399 | 29.3081877253450 |
| 38.2124991458841 | 30.0963498820932 |
| 38.2149991458282 | 29.3291416603804 |
| 38.2174991457723 | 30.1323613401198 |
| 38.2199991457164 | 29.3587104556919 |
| 38.2224991456605 | 30.1763413550088 |
| 38.2249991456047 | 29.3758145962154 |
| 38.2274991455488 | 30.2152667114531 |
| 38.2299991454929 | 29.3876358459873 |
| 38.2324991454370 | 30.2546196908864 |

|                  |                  |
|------------------|------------------|
| 38.2349991453812 | 29.3890191748863 |
| 38.2374991453253 | 30.2781608746421 |
| 38.2399991452694 | 29.3987910051818 |
| 38.2424991452135 | 30.2989134302717 |
| 38.2449991451576 | 29.4266259498477 |
| 38.2474991451018 | 30.3206149377212 |
| 38.2499991450459 | 29.4585745162717 |
| 38.2524991449900 | 30.3570964829481 |
| 38.2549991449341 | 29.4915248313217 |
| 38.2574991448782 | 30.3948917035914 |
| 38.2599991448224 | 29.5154964707767 |
| 38.2624991447665 | 30.4370952214383 |
| 38.2649991447106 | 29.5423499270666 |
| 38.2674991446547 | 30.4880486635549 |
| 38.2699991445988 | 29.5504989427715 |
| 38.2724991445430 | 30.5352958610014 |
| 38.2749991444871 | 29.5562834939349 |
| 38.2774991444312 | 30.5630300126214 |
| 38.2799991443753 | 29.5694567511753 |
| 38.2824991443194 | 30.5734910840617 |
| 38.2849991442636 | 29.6016797470433 |
| 38.2874991442077 | 30.5905427644655 |
| 38.2899991441518 | 29.6417664895224 |
| 38.2924991440959 | 30.6192515895235 |
| 38.2949991440400 | 29.6729680565770 |
| 38.2974991439842 | 30.6689941084130 |
| 38.2999991439283 | 29.6979666911778 |
| 38.3024991438724 | 30.7165410894062 |
| 38.3049991438165 | 29.7103984602927 |
| 38.3074991437607 | 30.7665372819070 |
| 38.3099991437048 | 29.7342025566551 |
| 38.3124991436489 | 30.8039224791371 |
| 38.3149991435930 | 29.7559330221614 |
| 38.3174991435371 | 30.8374008645472 |
| 38.3199991434813 | 29.7893802186464 |
| 38.3224991434254 | 30.8626928939174 |
| 38.3249991433695 | 29.8254408716782 |
| 38.3274991433136 | 30.8948783459521 |
| 38.3299991432577 | 29.8641104561321 |
| 38.3324991432019 | 30.9282069989924 |
| 38.3349991431460 | 29.8904702298720 |
| 38.3374991430901 | 30.9734895721186 |
| 38.3399991430342 | 29.9026724888599 |
| 38.3424991429783 | 31.0063461396356 |
| 38.3449991429225 | 29.9292549732333 |
| 38.3474991428666 | 31.0388531361725 |
| 38.3499991428107 | 29.9566817366464 |
| 38.3524991427548 | 31.0626382403687 |
| 38.3549991426989 | 30.0015347644826 |
| 38.3574991426431 | 31.1008210055040 |
| 38.3599991425872 | 30.0273985616025 |
| 38.3624991425313 | 31.1402263038770 |

|                  |                  |
|------------------|------------------|
| 38.3649991424754 | 30.0630896435481 |
| 38.3674991424195 | 31.1857728270164 |
| 38.3699991423637 | 30.0880414663146 |
| 38.3724991423078 | 31.2222304580012 |
| 38.3749991422519 | 30.1194346338543 |
| 38.3774991421960 | 31.2471250780822 |
| 38.3799991421402 | 30.1388258618628 |
| 38.3824991420843 | 31.2562927142557 |
| 38.3849991420284 | 30.1666291422430 |
| 38.3874991419725 | 31.2696807397810 |
| 38.3899991419166 | 30.1983563568079 |
| 38.3924991418608 | 31.2897817206511 |
| 38.3949991418049 | 30.2269180104620 |
| 38.3974991417490 | 31.3323570575597 |
| 38.3999991416931 | 30.2491927495617 |
| 38.4024991416372 | 31.3789672110450 |
| 38.4049991415814 | 30.2599589384831 |
| 38.4074991415255 | 31.4141264562245 |
| 38.4099991414696 | 30.2944881491693 |
| 38.4124991414137 | 31.4335261599120 |
| 38.4149991413578 | 30.3272466672961 |
| 38.4174991413020 | 31.4498626567458 |
| 38.4199991412461 | 30.3667450663857 |
| 38.4224991411902 | 31.4704330014688 |
| 38.4249991411343 | 30.3874965660792 |
| 38.4274991410784 | 31.4892380559732 |
| 38.4299991410226 | 30.4131519765582 |
| 38.4324991409667 | 31.5059055585468 |
| 38.4349991409108 | 30.4305950256752 |
| 38.4374991408549 | 31.5242354246217 |
| 38.4399991407990 | 30.4439634538338 |
| 38.4424991407432 | 31.5501776183861 |
| 38.4449991406873 | 30.4582848844033 |
| 38.4474991406314 | 31.5645098931480 |
| 38.4499991405755 | 30.4845377702182 |
| 38.4524991405196 | 31.5789024170386 |
| 38.4549991404638 | 30.5266903370138 |
| 38.4574991404079 | 31.5950577786999 |
| 38.4599991403520 | 30.5551309915901 |
| 38.4624991402961 | 31.6299166707840 |
| 38.4649991402403 | 30.5798473455530 |
| 38.4674991401844 | 31.6573200683871 |
| 38.4699991401285 | 30.5980633119675 |
| 38.4724991400726 | 31.6687184701555 |
| 38.4749991400167 | 30.6277848429979 |
| 38.4774991399609 | 31.6664107724313 |
| 38.4799991399050 | 30.6492113181549 |
| 38.4824991398491 | 31.6764718051694 |
| 38.4849991397932 | 30.6669237614971 |
| 38.4874991397373 | 31.6833961425441 |
| 38.4899991396815 | 30.6897980385234 |
| 38.4924991396256 | 31.7080560744893 |

|                  |                  |
|------------------|------------------|
| 38.4949991395697 | 30.7175271909499 |
| 38.4974991395138 | 31.7373371274101 |
| 38.4999991394579 | 30.7462930259454 |
| 38.5024991394021 | 31.7798108672590 |
| 38.5049991393462 | 30.7633475222447 |
| 38.5074991392903 | 31.8009383002528 |
| 38.5099991392344 | 30.7993059243306 |
| 38.5124991391785 | 31.8037307222572 |
| 38.5149991391227 | 30.8360869026454 |
| 38.5174991390668 | 31.8034636622297 |
| 38.5199991390109 | 30.8751318149538 |
| 38.5224991389550 | 31.8244874847944 |
| 38.5249991388991 | 30.8908984994954 |
| 38.5274991388433 | 31.8463524350326 |
| 38.5299991387874 | 30.9145031442980 |
| 38.5324991387315 | 31.8681501627864 |
| 38.5349991386756 | 30.9413219916821 |
| 38.5374991386198 | 31.8890981002036 |
| 38.5399991385639 | 30.9710589190976 |
| 38.5424991385080 | 31.9141529247110 |
| 38.5449991384521 | 30.9984059936506 |
| 38.5474991383962 | 31.9286727961192 |
| 38.5499991383404 | 31.0295528929454 |
| 38.5524991382845 | 31.9321928447592 |
| 38.5549991382286 | 31.0702207658148 |
| 38.5574991381727 | 31.9376537798473 |
| 38.5599991381168 | 31.1005257973761 |
| 38.5624991380610 | 31.9582966182887 |
| 38.5649991380051 | 31.1293197800064 |
| 38.5674991379492 | 31.9878818637300 |
| 38.5699991378933 | 31.1537604626160 |
| 38.5724991378374 | 32.0038874855945 |
| 38.5749991377816 | 31.1950860739068 |
| 38.5774991377257 | 32.0154606406799 |
| 38.5799991376698 | 31.2302008097038 |
| 38.5824991376139 | 32.0285594355917 |
| 38.5849991375580 | 31.2598208019582 |
| 38.5874991375022 | 32.0442372091057 |
| 38.5899991374463 | 31.2834244605541 |
| 38.5924991373904 | 32.0482688038309 |
| 38.5949991373345 | 31.3167672380659 |
| 38.5974991372786 | 32.0608286762492 |
| 38.5999991372228 | 31.3530030814793 |
| 38.6024991371669 | 32.0787523245722 |
| 38.6049991371110 | 31.3854123430410 |
| 38.6074991370551 | 32.1076393110763 |
| 38.6099991369992 | 31.4243373776371 |
| 38.6124991369434 | 32.1236707570119 |
| 38.6149991368875 | 31.4669324993222 |
| 38.6174991368316 | 32.1426275142363 |
| 38.6199991367757 | 31.5077681106417 |
| 38.6224991367199 | 32.1614027653533 |



|                  |                  |
|------------------|------------------|
| 38.6249991366640 | 31.5306492182881 |
| 38.6274991366081 | 32.1805317849416 |
| 38.6299991365522 | 31.5578265141214 |
| 38.6324991364963 | 32.1804530414055 |
| 38.6349991364405 | 31.5928562197596 |
| 38.6374991363846 | 32.1879760285745 |
| 38.6399991363287 | 31.6377604658848 |
| 38.6424991362728 | 32.2026456857582 |
| 38.6449991362169 | 31.6761283770531 |
| 38.6474991361611 | 32.2380716987747 |
| 38.6499991361052 | 31.7095743011016 |
| 38.6524991360493 | 32.2630438354881 |
| 38.6549991359934 | 31.7429258816656 |
| 38.6574991359375 | 32.2828276605255 |
| 38.6599991358817 | 31.7785420693752 |
| 38.6624991358258 | 32.2938354003100 |
| 38.6649991357699 | 31.8100177961335 |
| 38.6674991357140 | 32.3095700054155 |
| 38.6699991356581 | 31.8382728006754 |
| 38.6724991356023 | 32.3174093487093 |
| 38.6749991355464 | 31.8712081970458 |
| 38.6774991354905 | 32.3307811758502 |
| 38.6799991354346 | 31.9119929754485 |
| 38.6824991353787 | 32.3525502918865 |
| 38.6849991353229 | 31.9548950642968 |
| 38.6874991352670 | 32.3828105860980 |
| 38.6899991352111 | 31.9932281252131 |
| 38.6924991351552 | 32.4084261471356 |
| 38.6949991350994 | 32.0342914830413 |
| 38.6974991350435 | 32.4256863691250 |
| 38.6999991349876 | 32.0694381235599 |
| 38.7024991349317 | 32.4379367168630 |
| 38.7049991348758 | 32.1008737459031 |
| 38.7074991348200 | 32.4517392464506 |
| 38.7099991347641 | 32.1216997515491 |
| 38.7124991347082 | 32.4663837277021 |
| 38.7149991346523 | 32.1523817319244 |
| 38.7174991345964 | 32.4796980311235 |
| 38.7199991345406 | 32.1859409200130 |
| 38.7224991344847 | 32.4992571919345 |
| 38.7249991344288 | 32.2362628181407 |
| 38.7274991343729 | 32.5147540596439 |
| 38.7299991343170 | 32.2862200895222 |
| 38.7324991342612 | 32.5318137748874 |
| 38.7349991342053 | 32.3385245660806 |
| 38.7374991341494 | 32.5446749764776 |
| 38.7399991340935 | 32.3772038737944 |
| 38.7424991340376 | 32.5707806437713 |
| 38.7449991339818 | 32.4020845855736 |
| 38.7474991339259 | 32.5981974253471 |
| 38.7499991338700 | 32.4151035506677 |
| 38.7524991338141 | 32.6243537841740 |

|                  |                  |
|------------------|------------------|
| 38.7549991337582 | 32.4348804912582 |
| 38.7574991337024 | 32.6287764281625 |
| 38.7599991336465 | 32.4813401351514 |
| 38.7624991335906 | 32.6304299426001 |
| 38.7649991335347 | 32.5357141708553 |
| 38.7674991334789 | 32.6301815218764 |
| 38.7699991334230 | 32.5980519531680 |
| 38.7724991333671 | 32.6572887728421 |
| 38.7749991333112 | 32.6334407549102 |
| 38.7774991332553 | 32.6941147254465 |
| 38.7799991331995 | 32.6638027785697 |
| 38.7824991331436 | 32.7411931027760 |
| 38.7849991330877 | 32.6813085936000 |
| 38.7874991330318 | 32.7747541104037 |
| 38.7899991329759 | 32.7174782543286 |
| 38.7924991329201 | 32.7961006887778 |
| 38.7949991328642 | 32.7593433012750 |
| 38.7974991328083 | 32.7976590346235 |
| 38.7999991327524 | 32.8154981299299 |
| 38.8024991326965 | 32.7954775393477 |
| 38.8049991326407 | 32.8711506991358 |
| 38.8074991325848 | 32.7953519340112 |
| 38.8099991325289 | 32.9136275411544 |
| 38.8124991324730 | 32.8230931979380 |
| 38.8149991324171 | 32.9419224623261 |
| 38.8174991323613 | 32.8624405142771 |
| 38.8199991323054 | 32.9541958318745 |
| 38.8224991322495 | 32.9032711395360 |
| 38.8249991321936 | 32.9874633323178 |
| 38.8274991321377 | 32.9258345047408 |
| 38.8299991320819 | 33.0360984465440 |
| 38.8324991320260 | 32.9354333045599 |
| 38.8349991319701 | 33.1115697688500 |
| 38.8374991319142 | 32.9450031410280 |
| 38.8399991318583 | 33.1684769814522 |
| 38.8424991318025 | 32.9671946412740 |
| 38.8449991317466 | 33.2125485641166 |
| 38.8474991316907 | 32.9979927308684 |
| 38.8499991316348 | 33.2270046049994 |
| 38.8524991315790 | 33.0271729373637 |
| 38.8549991315231 | 33.2449104021374 |
| 38.8574991314672 | 33.0474106431913 |
| 38.8599991314113 | 33.2738044293626 |
| 38.8624991313554 | 33.0561988237104 |
| 38.8649991312996 | 33.3180550462820 |
| 38.8674991312437 | 33.0640851598218 |
| 38.8699991311878 | 33.3798840253889 |
| 38.8724991311319 | 33.0785611525176 |
| 38.8749991310760 | 33.4349211154733 |
| 38.8774991310202 | 33.1186563463649 |
| 38.8799991309643 | 33.4782219718946 |
| 38.8824991309084 | 33.1659876637390 |

|                  |                  |
|------------------|------------------|
| 38.8849991308525 | 33.5005496777550 |
| 38.8874991307966 | 33.2062020255527 |
| 38.8899991307408 | 33.5301847808751 |
| 38.8924991306849 | 33.2251418739062 |
| 38.8949991306290 | 33.5641975783107 |
| 38.8974991305731 | 33.2258365865400 |
| 38.8999991305172 | 33.6136412399075 |
| 38.9024991304614 | 33.2183470444195 |
| 38.9049991304055 | 33.6582037438229 |
| 38.9074991303496 | 33.2213739405020 |
| 38.9099991302937 | 33.6994828626317 |
| 38.9124991302378 | 33.2368036611853 |
| 38.9149991301820 | 33.7287194006595 |
| 38.9174991301261 | 33.2764358223352 |
| 38.9199991300702 | 33.7508804068531 |
| 38.9224991300143 | 33.3149302856153 |
| 38.9249991299585 | 33.7783961138049 |
| 38.9274991299026 | 33.3440926426445 |
| 38.9299991298467 | 33.8185859239675 |
| 38.9324991297908 | 33.3547214807085 |
| 38.9349991297349 | 33.8789027319592 |
| 38.9374991296791 | 33.3572454505204 |
| 38.9399991296232 | 33.9364244875048 |
| 38.9424991295673 | 33.3677722936728 |
| 38.9449991295114 | 33.9719352301127 |
| 38.9474991294555 | 33.3913799536605 |
| 38.9499991293997 | 33.9846269685688 |
| 38.9524991293438 | 33.4135292020826 |
| 38.9549991292879 | 33.9966328534213 |
| 38.9574991292320 | 33.4305085240854 |
| 38.9599991291761 | 34.0278585533396 |
| 38.9624991291203 | 33.4410687034200 |
| 38.9649991290644 | 34.0675862070628 |
| 38.9674991290085 | 33.4535494034700 |
| 38.9699991289526 | 34.1200782401136 |
| 38.9724991288967 | 33.4707628971329 |
| 38.9749991288409 | 34.1676528259341 |
| 38.9774991287850 | 33.4954969380819 |
| 38.9799991287291 | 34.2113416303898 |
| 38.9824991286732 | 33.5306786315372 |
| 38.9849991286173 | 34.2331274952013 |
| 38.9874991285615 | 33.5618341873864 |
| 38.9899991285056 | 34.2507233942040 |
| 38.9924991284497 | 33.5750103590039 |
| 38.9949991283938 | 34.2763613080416 |
| 38.9974991283379 | 33.5698614886528 |
| 38.9999991282821 | 34.3207650619296 |
| 39.0024991282262 | 33.5619881844762 |
| 39.0049991281703 | 34.3698634126445 |
| 39.0074991281144 | 33.5735497557368 |
| 39.0099991280586 | 34.4016841762169 |
| 39.0124991280027 | 33.6045641828187 |

|                  |                  |
|------------------|------------------|
| 39.0149991279468 | 34.4279838470541 |
| 39.0174991278909 | 33.6357626802679 |
| 39.0199991278350 | 34.4486978452162 |
| 39.0224991277792 | 33.6590069704146 |
| 39.0249991277233 | 34.4821599789043 |
| 39.0274991276674 | 33.6775418289911 |
| 39.0299991276115 | 34.5071185013104 |
| 39.0324991275556 | 33.6853210536390 |
| 39.0349991274998 | 34.5538948167275 |
| 39.0374991274439 | 33.6881200420847 |
| 39.0399991273880 | 34.6012788234644 |
| 39.0424991273321 | 33.6941199266363 |
| 39.0449991272762 | 34.6465940178190 |
| 39.0474991272204 | 33.7231061859163 |
| 39.0499991271645 | 34.6632127004132 |
| 39.0524991271086 | 33.7580507932175 |
| 39.0549991270527 | 34.6711559475115 |
| 39.0574991269968 | 33.7829289470171 |
| 39.0599991269410 | 34.6938426361583 |
| 39.0624991268851 | 33.7871249086630 |
| 39.0649991268292 | 34.7314966014820 |
| 39.0674991267733 | 33.7959509705191 |
| 39.0699991267174 | 34.7750707362611 |
| 39.0724991266616 | 33.8142680926942 |
| 39.0749991266057 | 34.8090075827841 |
| 39.0774991265498 | 33.8404450108780 |
| 39.0799991264939 | 34.8571172044159 |
| 39.0824991264381 | 33.8632051971860 |
| 39.0849991263822 | 34.8950104244988 |
| 39.0874991263263 | 33.8994396443092 |
| 39.0899991262704 | 34.9241161507022 |
| 39.0924991262145 | 33.9273491603348 |
| 39.0949991261587 | 34.9355804461904 |
| 39.0974991261028 | 33.9426043473099 |
| 39.0999991260469 | 34.9604576842892 |
| 39.1024991259910 | 33.9386966130751 |
| 39.1049991259351 | 34.9973709777572 |
| 39.1074991258793 | 33.9514745363315 |
| 39.1099991258234 | 35.0306757359200 |
| 39.1124991257675 | 33.9851240280126 |
| 39.1149991257116 | 35.0605054275604 |
| 39.1174991256557 | 34.0163276518101 |
| 39.1199991255999 | 35.0948972121508 |
| 39.1224991255440 | 34.0291924729935 |
| 39.1249991254881 | 35.1467769605117 |
| 39.1274991254322 | 34.0470447941226 |
| 39.1299991253763 | 35.1790342686478 |
| 39.1324991253205 | 34.0767827872397 |
| 39.1349991252646 | 35.2015066297108 |
| 39.1374991252087 | 34.1018097098426 |
| 39.1399991251528 | 35.2136610384210 |
| 39.1424991250969 | 34.1125246254930 |

|                  |                  |
|------------------|------------------|
| 39.1449991250411 | 35.2496039655442 |
| 39.1474991249852 | 34.1246560401494 |
| 39.1499991249293 | 35.2798865082868 |
| 39.1524991248734 | 34.1530494860648 |
| 39.1549991248176 | 35.3028850094673 |
| 39.1574991247617 | 34.1733928163489 |
| 39.1599991247058 | 35.3321314299297 |
| 39.1624991246499 | 34.1787240311856 |
| 39.1649991245940 | 35.3762408180314 |
| 39.1674991245382 | 34.1845750517632 |
| 39.1699991244823 | 35.4197839838097 |
| 39.1724991244264 | 34.2211645166352 |
| 39.1749991243705 | 35.4298654094264 |
| 39.1774991243146 | 34.2592089282635 |
| 39.1799991242588 | 35.4437806033758 |
| 39.1824991242029 | 34.2853528781381 |
| 39.1849991241470 | 35.4663668362408 |
| 39.1874991240911 | 34.2922553666910 |
| 39.1899991240352 | 35.5114839220043 |
| 39.1924991239794 | 34.3148248305475 |
| 39.1949991239235 | 35.5321560501349 |
| 39.1974991238676 | 34.3256388687469 |
| 39.1999991238117 | 35.5523774442968 |
| 39.2024991237558 | 34.3279543130723 |
| 39.2049991237000 | 35.5825642831711 |
| 39.2074991236441 | 34.3327688226526 |
| 39.2099991235882 | 35.6159064449760 |
| 39.2124991235323 | 34.3727465488981 |
| 39.2149991234764 | 35.6319777573125 |
| 39.2174991234206 | 34.4131238764976 |
| 39.2199991233647 | 35.6374366521869 |
| 39.2224991233088 | 34.4384428652157 |
| 39.2249991232529 | 35.6693554338704 |
| 39.2274991231970 | 34.4382807056959 |
| 39.2299991231412 | 35.7094218164819 |
| 39.2324991230853 | 34.4586044690705 |
| 39.2349991230294 | 35.7433903248548 |
| 39.2374991229735 | 34.4843810222964 |
| 39.2399991229177 | 35.7525044000963 |
| 39.2424991228618 | 34.5057211210202 |
| 39.2449991228059 | 35.7761872023003 |
| 39.2474991227500 | 34.5117184290277 |
| 39.2499991226941 | 35.8059252269536 |
| 39.2524991226383 | 34.5359331410552 |
| 39.2549991225824 | 35.8259328403913 |
| 39.2574991225265 | 34.5710768548784 |
| 39.2599991224706 | 35.8365466700897 |
| 39.2624991224147 | 34.5972487472936 |
| 39.2649991223589 | 35.8611444485136 |
| 39.2674991223030 | 34.6069484518831 |
| 39.2699991222471 | 35.9114257431827 |
| 39.2724991221912 | 34.6308989700390 |

|                  |                  |
|------------------|------------------|
| 39.2749991221353 | 35.9389092367560 |
| 39.2774991220795 | 34.6729397838452 |
| 39.2799991220236 | 35.9522918053888 |
| 39.2824991219677 | 34.7044425575078 |
| 39.2849991219118 | 35.9638708649599 |
| 39.2874991218559 | 34.7200112924648 |
| 39.2899991218001 | 36.0061249617331 |
| 39.2924991217442 | 34.7333351283456 |
| 39.2949991216883 | 36.0328339878962 |
| 39.2974991216324 | 34.7622421547292 |
| 39.2999991215765 | 36.0464298728806 |
| 39.3024991215207 | 34.7846346778942 |
| 39.3049991214648 | 36.0617061776207 |
| 39.3074991214089 | 34.8057928232152 |
| 39.3099991213530 | 36.0983874270329 |
| 39.3124991212972 | 34.8345768197556 |
| 39.3149991212413 | 36.1335519481947 |
| 39.3174991211854 | 34.8850313943169 |
| 39.3199991211295 | 36.1438782755289 |
| 39.3224991210736 | 34.9172411926699 |
| 39.3249991210178 | 36.1635311104151 |
| 39.3274991209619 | 34.9332668982604 |
| 39.3299991209060 | 36.1976810986626 |
| 39.3324991208501 | 34.9402451418639 |
| 39.3349991207942 | 36.2434857615012 |
| 39.3374991207384 | 34.9801751463675 |
| 39.3399991206825 | 36.2518728742651 |
| 39.3424991206266 | 35.0192766365632 |
| 39.3449991205707 | 36.2610836654945 |
| 39.3474991205148 | 35.0442873716160 |
| 39.3499991204590 | 36.2819227069032 |
| 39.3524991204031 | 35.0558547735015 |
| 39.3549991203472 | 36.3212096041957 |
| 39.3574991202913 | 35.0928116690379 |
| 39.3599991202354 | 36.3393851376887 |
| 39.3624991201796 | 35.1333247758961 |
| 39.3649991201237 | 36.3590536791151 |
| 39.3674991200678 | 35.1652798460120 |
| 39.3699991200119 | 36.3973849811232 |
| 39.3724991199560 | 35.1870290033460 |
| 39.3749991199002 | 36.4332675099282 |
| 39.3774991198443 | 35.2303625301545 |
| 39.3799991197884 | 36.4520807400435 |
| 39.3824991197325 | 35.2747796631746 |
| 39.3849991196766 | 36.4552209693820 |
| 39.3874991196208 | 35.3054533468468 |
| 39.3899991195649 | 36.4859921065451 |
| 39.3924991195090 | 35.3147203435287 |
| 39.3949991194531 | 36.5242679551360 |
| 39.3974991193973 | 35.3350904939737 |
| 39.3999991193414 | 36.5580691650904 |
| 39.4024991192855 | 35.3813933502135 |



|                  |                  |
|------------------|------------------|
| 39.4049991192296 | 36.5689874793087 |
| 39.4074991191737 | 35.4332272678978 |
| 39.4099991191179 | 36.5945072710475 |
| 39.4124991190620 | 35.4739406090991 |
| 39.4149991190061 | 36.6334029865247 |
| 39.4174991189502 | 35.5149590195858 |
| 39.4199991188943 | 36.6622837258670 |
| 39.4224991188385 | 35.5569823589651 |
| 39.4249991187826 | 36.6830645920572 |
| 39.4274991187267 | 35.5795718606551 |
| 39.4299991186708 | 36.7134120325415 |
| 39.4324991186149 | 35.5964210855535 |
| 39.4349991185591 | 36.7624074116003 |
| 39.4374991185032 | 35.6331334948391 |
| 39.4399991184473 | 36.7829551997702 |
| 39.4424991183914 | 35.6942515055548 |
| 39.4449991183355 | 36.7905774066069 |
| 39.4474991182797 | 35.7414066704374 |
| 39.4499991182238 | 36.8017723252349 |
| 39.4524991181679 | 35.7684353727194 |
| 39.4549991181120 | 36.8447717138530 |
| 39.4574991180561 | 35.7922792677150 |
| 39.4599991180003 | 36.8857803320354 |
| 39.4624991179444 | 35.8358219793065 |
| 39.4649991178885 | 36.9168056680556 |
| 39.4674991178326 | 35.8830612562690 |
| 39.4699991177768 | 36.9432717591318 |
| 39.4724991177209 | 35.9258615811825 |
| 39.4749991176650 | 36.9675597925664 |
| 39.4774991176091 | 35.9637964562792 |
| 39.4799991175532 | 36.9958095001778 |
| 39.4824991174974 | 36.0143785783130 |
| 39.4849991174415 | 37.0017589408475 |
| 39.4874991173856 | 36.0516100633958 |
| 39.4899991173297 | 37.0253620444051 |
| 39.4924991172738 | 36.0663741865207 |
| 39.4949991172180 | 37.0579751490724 |
| 39.4974991171621 | 36.0812494390965 |
| 39.4999991171062 | 37.1046831433163 |
| 39.5024991170503 | 36.1302713112122 |
| 39.5049991169944 | 37.1142332718858 |
| 39.5074991169386 | 36.1974848329789 |
| 39.5099991168827 | 37.1245401385594 |
| 39.5124991168268 | 36.2511180278604 |
| 39.5149991167709 | 37.1455445645750 |
| 39.5174991167150 | 36.2811718537918 |
| 39.5199991166592 | 37.1830337445191 |
| 39.5224991166033 | 36.3087923031761 |
| 39.5249991165474 | 37.2129942942315 |
| 39.5274991164915 | 36.3352515994991 |
| 39.5299991164356 | 37.2331974713795 |
| 39.5324991163798 | 36.3614057618395 |

|                  |                  |
|------------------|------------------|
| 39.5349991163239 | 37.2625249749922 |
| 39.5374991162680 | 36.3973480848876 |
| 39.5399991162121 | 37.2759119382442 |
| 39.5424991161563 | 36.4473011170804 |
| 39.5449991161004 | 37.2893522620380 |
| 39.5474991160445 | 36.4977511587959 |
| 39.5499991159886 | 37.2886189153485 |
| 39.5524991159327 | 36.5328735343170 |
| 39.5549991158769 | 37.3208510213811 |
| 39.5574991158210 | 36.5581015743303 |
| 39.5599991157651 | 37.3618780567306 |
| 39.5624991157092 | 36.5965864244800 |
| 39.5649991156533 | 37.4039178338992 |
| 39.5674991155975 | 36.6528468962458 |
| 39.5699991155416 | 37.4190749625177 |
| 39.5724991154857 | 36.7060310166246 |
| 39.5749991154298 | 37.4327695412195 |
| 39.5774991153739 | 36.7454628220179 |
| 39.5799991153181 | 37.4542890981619 |
| 39.5824991152622 | 36.7768753609273 |
| 39.5849991152063 | 37.4739411446953 |
| 39.5874991151504 | 36.8088887925939 |
| 39.5899991150945 | 37.4973854030067 |
| 39.5924991150387 | 36.8418610732340 |
| 39.5949991149828 | 37.5183093664619 |
| 39.5974991149269 | 36.8814093411317 |
| 39.5999991148710 | 37.5524675243639 |
| 39.6024991148151 | 36.9413130384239 |
| 39.6049991147593 | 37.5689446779743 |
| 39.6074991147034 | 37.0068208686516 |
| 39.6099991146475 | 37.5918384054260 |
| 39.6124991145916 | 37.0572467900210 |
| 39.6149991145357 | 37.6169502288723 |
| 39.6174991144799 | 37.0867054045185 |
| 39.6199991144240 | 37.6596125928078 |
| 39.6224991143681 | 37.1052145321254 |
| 39.6249991143122 | 37.6960636551269 |
| 39.6274991142564 | 37.1351993671588 |
| 39.6299991142005 | 37.7164774999771 |
| 39.6324991141446 | 37.1877694193112 |
| 39.6349991140887 | 37.7215396687020 |
| 39.6374991140328 | 37.2463650900989 |
| 39.6399991139770 | 37.7245422232411 |
| 39.6424991139211 | 37.3001847383170 |
| 39.6449991138652 | 37.7482653340786 |
| 39.6474991138093 | 37.3398425042230 |
| 39.6499991137534 | 37.7733110907642 |
| 39.6524991136976 | 37.3698870574601 |
| 39.6549991136417 | 37.8131166972203 |
| 39.6574991135858 | 37.3945072466386 |
| 39.6599991135299 | 37.8520379551180 |
| 39.6624991134740 | 37.4331313179234 |

|                  |                  |
|------------------|------------------|
| 39.6649991134182 | 37.8802001005710 |
| 39.6674991133623 | 37.4908882491674 |
| 39.6699991133064 | 37.8814024348311 |
| 39.6724991132505 | 37.5565386834456 |
| 39.6749991131946 | 37.8790556882924 |
| 39.6774991131388 | 37.6093712445022 |
| 39.6799991130829 | 37.8867720738042 |
| 39.6824991130270 | 37.6417215805040 |
| 39.6849991129711 | 37.9166842940823 |
| 39.6874991129152 | 37.6604850229658 |
| 39.6899991128594 | 37.9540667409550 |
| 39.6924991128035 | 37.6860246881347 |
| 39.6949991127476 | 37.9810975036151 |
| 39.6974991126917 | 37.7253537710654 |
| 39.6999991126359 | 37.9926309683426 |
| 39.7024991125800 | 37.7766825237202 |
| 39.7049991125241 | 37.9947609393491 |
| 39.7074991124682 | 37.8360494026440 |
| 39.7099991124123 | 38.0005198286818 |
| 39.7124991123565 | 37.8911828448164 |
| 39.7149991123006 | 38.0143511604885 |
| 39.7174991122447 | 37.9373402355122 |
| 39.7199991121888 | 38.0402961610711 |
| 39.7224991121329 | 37.9700807969221 |
| 39.7249991120771 | 38.0712621929458 |
| 39.7274991120212 | 37.9971410903351 |
| 39.7299991119653 | 38.0939458249912 |
| 39.7324991119094 | 38.0274052060994 |
| 39.7349991118535 | 38.1005838379244 |
| 39.7374991117977 | 38.0667540268063 |
| 39.7399991117418 | 38.0997223144074 |
| 39.7424991116859 | 38.1077459036673 |
| 39.7449991116300 | 38.1045705538651 |
| 39.7474991115741 | 38.1563902959467 |
| 39.7499991115183 | 38.1206318969692 |
| 39.7524991114624 | 38.2027916393635 |
| 39.7549991114065 | 38.1484132515126 |
| 39.7574991113506 | 38.2524221106780 |
| 39.7599991112947 | 38.1789434283389 |
| 39.7624991112389 | 38.2983015196129 |
| 39.7649991111830 | 38.1963899274232 |
| 39.7674991111271 | 38.3382868074905 |
| 39.7699991110712 | 38.2062205116359 |
| 39.7724991110153 | 38.3669166401080 |
| 39.7749991109595 | 38.2111988496819 |
| 39.7774991109036 | 38.3931954544868 |
| 39.7799991108477 | 38.2213943086575 |
| 39.7824991107918 | 38.4203565599917 |
| 39.7849991107360 | 38.2387485494862 |
| 39.7874991106801 | 38.4628115476689 |
| 39.7899991106242 | 38.2647067231853 |
| 39.7924991105683 | 38.5104529113524 |

|                  |                  |
|------------------|------------------|
| 39.7949991105124 | 38.2922112028457 |
| 39.7974991104566 | 38.5653445598854 |
| 39.7999991104007 | 38.3138507669532 |
| 39.8024991103448 | 38.6204645142644 |
| 39.8049991102889 | 38.3225222293216 |
| 39.8074991102330 | 38.6658637040648 |
| 39.8099991101772 | 38.3224670440400 |
| 39.8124991101213 | 38.6910232239508 |
| 39.8149991100654 | 38.3324190819294 |
| 39.8174991100095 | 38.7076820355440 |
| 39.8199991099536 | 38.3544676622457 |
| 39.8224991098978 | 38.7317519380600 |
| 39.8249991098419 | 38.3835043646579 |
| 39.8274991097860 | 38.7728608188735 |
| 39.8299991097301 | 38.4101371852344 |
| 39.8324991096742 | 38.8200290862122 |
| 39.8349991096184 | 38.4364600982936 |
| 39.8374991095625 | 38.8666739769846 |
| 39.8399991095066 | 38.4543504301656 |
| 39.8424991094507 | 38.9183145399734 |
| 39.8449991093948 | 38.4587763029374 |
| 39.8474991093390 | 38.9691235494839 |
| 39.8499991092831 | 38.4531211706432 |
| 39.8524991092272 | 39.0054697612399 |
| 39.8549991091713 | 38.4568116956025 |
| 39.8574991091155 | 39.0220933034835 |
| 39.8599991090596 | 38.4823740039062 |
| 39.8624991090037 | 39.0416565410690 |
| 39.8649991089478 | 38.5141569404145 |
| 39.8674991088919 | 39.0746352494606 |
| 39.8699991088361 | 38.5423032109658 |
| 39.8724991087802 | 39.1222493699274 |
| 39.8749991087243 | 38.5619105205672 |
| 39.8774991086684 | 39.1664841374377 |
| 39.8799991086125 | 38.5799307066679 |
| 39.8824991085567 | 39.2182040287861 |
| 39.8849991085008 | 38.5833462080032 |
| 39.8874991084449 | 39.2709743118712 |
| 39.8899991083890 | 38.5734149360319 |
| 39.8924991083331 | 39.3111458529333 |
| 39.8949991082773 | 38.5753671453039 |
| 39.8974991082214 | 39.3275101273552 |
| 39.8999991081655 | 38.6024098260658 |
| 39.9024991081096 | 39.3454755973379 |
| 39.9049991080537 | 38.6431387856033 |
| 39.9074991079979 | 39.3713362107208 |
| 39.9099991079420 | 38.6692833950585 |
| 39.9124991078861 | 39.4135973987615 |
| 39.9149991078302 | 38.6866915356947 |
| 39.9174991077743 | 39.4526762612802 |
| 39.9199991077185 | 38.6957506732280 |
| 39.9224991076626 | 39.5026074699024 |

|                  |                  |
|------------------|------------------|
| 39.9249991076067 | 38.7057502332316 |
| 39.9274991075508 | 39.5550501927996 |
| 39.9299991074950 | 38.7097735227908 |
| 39.9324991074391 | 39.6002008445936 |
| 39.9349991073832 | 38.7209509310736 |
| 39.9374991073273 | 39.6232027012142 |
| 39.9399991072714 | 38.7539624773459 |
| 39.9424991072156 | 39.6455908778239 |
| 39.9449991071597 | 38.7935570411236 |
| 39.9474991071038 | 39.6838163266525 |
| 39.9499991070479 | 38.8223879170902 |
| 39.9524991069920 | 39.7345746521698 |
| 39.9549991069362 | 38.8268820340989 |
| 39.9574991068803 | 39.7713690899768 |
| 39.9599991068244 | 38.8429597590351 |
| 39.9624991067685 | 39.7989541930915 |
| 39.9649991067126 | 38.8599382875543 |
| 39.9674991066568 | 39.8355289370223 |
| 39.9699991066009 | 38.8839712310334 |
| 39.9724991065450 | 39.8863746639015 |
| 39.9749991064891 | 38.9002245593029 |
| 39.9774991064332 | 39.9339212000966 |
| 39.9799991063774 | 38.9336700838419 |
| 39.9824991063215 | 39.9692238853893 |
| 39.9849991062656 | 38.9770807763330 |
| 39.9874991062097 | 40.0063477550574 |
| 39.9899991061538 | 39.0056013759622 |
| 39.9924991060980 | 40.0446791527312 |
| 39.9949991060421 | 39.0197533107291 |
| 39.9974991059862 | 40.0760970369810 |
| 39.9999991059303 | 39.0298739810695 |
| 40.0024991058744 | 40.0972289435096 |

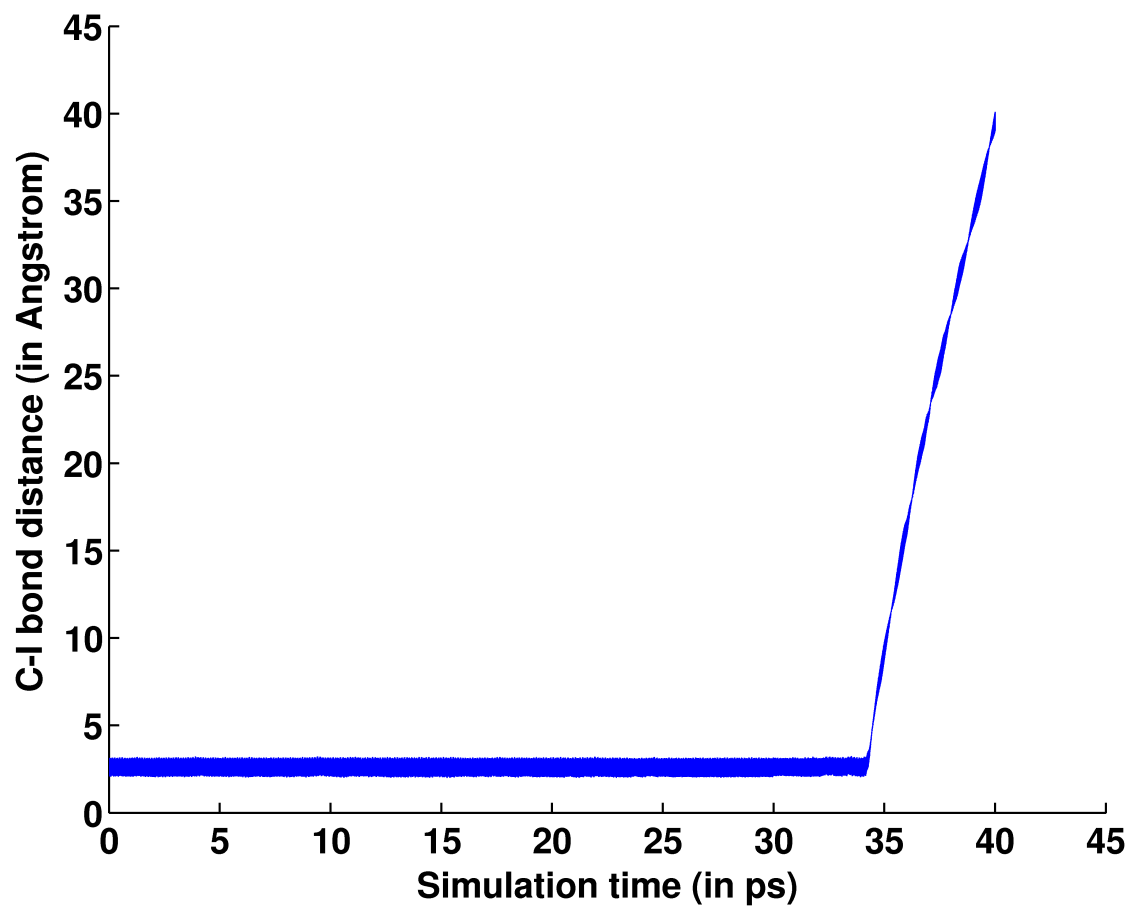

**Plot Of BOMD simulation**

-----  
-----
